# Supplementary material for: Two complementary approaches for the synthesis and isolation of stable phosphanylphosphaalkenes
Source: Royal Society of Chemistry journal article supplement (doi:10.1039/d1qi00550b), 2021-01-01
Supplement: d1qi00550b1.pdf [file d1qi00550b1.pdf]

# Two complimentary approaches for the synthesis and isolation of stable phosphanylphosphaalkenes

Aleksandra Ziólkowska, Natalia Szykiewicz, Łukasz Ponikiewski\*

Department of Inorganic Chemistry, Chemical Faculty, Gdansk University of Technology, ul. Narutowicza 11/12, 80-233 Gdańsk

**KEYWORDS:** *Stable phosphanylphosphaalkenes; phospha-Wittig reaction; phospha-Peterson reaction; organophosphorus compounds.*

|                                                                                                                                                                    |    |
|--------------------------------------------------------------------------------------------------------------------------------------------------------------------|----|
| PART A. Experimental section .....                                                                                                                                 | 5  |
| <b>A.1. Materials and method</b> .....                                                                                                                             | 5  |
| <b>A.2. General method for the phospha-Wittig reaction of [(BDI*)Ti(Cl){<math>\eta^2</math>-P-PtBu<sub>2</sub>}] (1) with selected ketones and aldehydes</b> ..... | 5  |
| A.2.1. Reaction of <b>1</b> with benzophenone.....                                                                                                                 | 5  |
| A.2.2. Reaction of <b>1</b> with 9-fluorenone .....                                                                                                                | 6  |
| A.2.3. Reaction of <b>1</b> with 4-cyanobenzophenone .....                                                                                                         | 7  |
| A.2.4. Reaction of <b>1</b> with 4,4'-dicyanobenzophenone .....                                                                                                    | 8  |
| A.2.5. Reaction of <b>1</b> with 4,4'-dimethoxybenzophenone .....                                                                                                  | 9  |
| A.2.6. Reaction of <b>1</b> with <i>tert</i> -butyl phenyl ketone .....                                                                                            | 10 |
| A.2.7. Reaction of <b>1</b> with acetone.....                                                                                                                      | 11 |
| A.2.8. Reaction of <b>1</b> with cyclohexanone .....                                                                                                               | 12 |
| A.2.9. Reaction of <b>1</b> with acetophenone.....                                                                                                                 | 13 |
| A.2.10. Reaction of <b>1</b> with cyclopropyl methyl ketone .....                                                                                                  | 14 |
| A.2.11. Reaction of <b>1</b> with isobutyraldehyde .....                                                                                                           | 15 |
| A.2.12. Reaction of <b>1</b> with cyclohexanecarboxaldehyde.....                                                                                                   | 16 |
| A.2.13. Reaction of <b>1</b> with <i>p</i> -tolualdehyde.....                                                                                                      | 17 |
| A.2.14. Reaction of <b>1</b> with 4-(dimethylamino)benzaldehyde.....                                                                                               | 18 |
| A.2.15. Reaction of <b>1</b> with biphenyl-4-carboxaldehyde.....                                                                                                   | 19 |
| <b>A.3. General method for the phospha-Peterson reaction of <i>t</i>Bu<sub>2</sub>P-P(SiMe<sub>3</sub>)Li·3THF (2) with selected ketones and aldehydes</b> .....   | 20 |
| A.3.1. Reaction of <b>2</b> benzophenone.....                                                                                                                      | 20 |
| A.3.2. Reaction of <b>2</b> with 9-fluorenone .....                                                                                                                | 21 |

|                                                                                                                                           |           |
|-------------------------------------------------------------------------------------------------------------------------------------------|-----------|
| A.3.3. Reaction of <b>2</b> with 4-cyanobenzophenone .....                                                                                | 22        |
| A.3.4. Reaction of <b>2</b> with 4,4'-dicyanobenzophenone .....                                                                           | 23        |
| A.3.5. Reaction of <b>2</b> with 4,4'-dimethoxybenzophenone .....                                                                         | 24        |
| A.3.6. Reaction of <b>2</b> with <i>tert</i> -butyl phenyl ketone .....                                                                   | 25        |
| A.3.7. Reaction of <b>2</b> with acetone.....                                                                                             | 26        |
| A.3.8. Reaction of <b>2</b> with cyclohexanone .....                                                                                      | 27        |
| A.3.9. Reaction of <b>2</b> with acetophenone .....                                                                                       | 28        |
| A.3.10. Reaction of <b>2</b> with cyclopropyl methyl ketone .....                                                                         | 29        |
| A.3.11. Reaction of <b>2</b> with isobutyraldehyde .....                                                                                  | 30        |
| A.3.12. Reaction of <b>2</b> with cyclohexanecarbaldehyde.....                                                                            | 31        |
| A.3.13. Reaction of <b>2</b> with <i>p</i> -tolualdehyde .....                                                                            | 32        |
| A.3.14. Reaction of <b>2</b> with 4-(dimethylamino)benzaldehyde .....                                                                     | 33        |
| A.3.15. Reaction of <b>2</b> with biphenyl-4-carboxaldehyde .....                                                                         | 34        |
| PART B. NMR Spectra .....                                                                                                                 | 35        |
| <b>B.1. Reaction of [(BDI*)Ti(Cl){<math>\eta^2</math>-P-<i>t</i>Bu<sub>2</sub>}] (1) with selected ketones and aldehydes .....</b>        | <b>35</b> |
| B.1.1. Benzophenone .....                                                                                                                 | 35        |
| B.1.2. 9-fluorenone .....                                                                                                                 | 36        |
| B.1.3. 4-cyanobenzophenone.....                                                                                                           | 37        |
| B.1.4. 4,4'-dicyanobenzophenone .....                                                                                                     | 38        |
| B.1.5. 4,4'-dimethoxybenzophenone.....                                                                                                    | 39        |
| B.1.6. <i>Tert</i> -butyl phenyl ketone .....                                                                                             | 40        |
| B.1.7. Acetone .....                                                                                                                      | 41        |
| B.1.8. Cyclohexanone.....                                                                                                                 | 42        |
| B.1.9. Acetophenone .....                                                                                                                 | 43        |
| B.1.10. Cyclopropyl methyl ketone .....                                                                                                   | 44        |
| B.1.11. Isobutyraldehyde.....                                                                                                             | 50        |
| B.1.12. Cyclohexanecarboxaldehyde .....                                                                                                   | 57        |
| B.1.13. <i>p</i> -Tolualdehyde .....                                                                                                      | 62        |
| B.1.14. 4-(dimethylamino)benzaldehyde .....                                                                                               | 68        |
| B.1.15. Biphenyl-4-carboxaldehyde .....                                                                                                   | 69        |
| <b>B.2. Phospha-Peterson reaction of <i>t</i>Bu<sub>2</sub>P-P(SiMe<sub>3</sub>)Li·3THF (2) with selected ketones and aldehydes .....</b> | <b>70</b> |
| B.2.1. Benzophenone .....                                                                                                                 | 70        |
| B.2.2. 9-fluorenone .....                                                                                                                 | 75        |
| B.2.3. 4-cyanobenzophenone.....                                                                                                           | 78        |
| B.2.4. 4,4'-dicyanobenzophenone .....                                                                                                     | 83        |
| B.2.5. 4,4'-dimethoxybenzophenone.....                                                                                                    | 88        |
| B.2.6. <i>Tert</i> -butyl phenyl ketone .....                                                                                             | 93        |

|                                                                                                                                    |            |
|------------------------------------------------------------------------------------------------------------------------------------|------------|
| B.2.7. Acetone .....                                                                                                               | 97         |
| B.2.8. Cyclohexanone.....                                                                                                          | 102        |
| B.2.9. Acetophenone .....                                                                                                          | 107        |
| B.2.10. Cyclopropyl methyl ketone.....                                                                                             | 111        |
| B.2.11. Isobutyraldehyde.....                                                                                                      | 115        |
| B.2.12. Cyclohexanecarboxaldehyde .....                                                                                            | 116        |
| B.2.13. <i>p</i> -Tolualdehyde .....                                                                                               | 117        |
| B.2.14. 4-(dimethylamino)benzaldehyde .....                                                                                        | 118        |
| B.2.15. Biphenyl-4-carboxaldehyde .....                                                                                            | 124        |
| <b>B.3. Decomposition of the isolated crystals of phosphanylphosphaalkenes .....</b>                                               | <b>127</b> |
| B.3.1. (Ph) <sub>2</sub> C=P-PtBu <sub>2</sub> ( <b>3a</b> ) .....                                                                 | 127        |
| B.3.2. (Ph)(4-CN-Ph)C=P-PtBu <sub>2</sub> ( <b>3c</b> ).....                                                                       | 133        |
| B.3.3. (4-CN-Ph) <sub>2</sub> C=P-PtBu <sub>2</sub> ( <b>3d</b> ).....                                                             | 134        |
| B.3.4. (4-MeO-Ph) <sub>2</sub> C=P-PtBu <sub>2</sub> ( <b>3e</b> ).....                                                            | 135        |
| B.3.5. {(Me) <sub>2</sub> N-Ph}(H)C=P-PtBu <sub>2</sub> ( <b>4d</b> ) .....                                                        | 136        |
| B.3.6. PhPh(H)C=P-PtBu <sub>2</sub> ( <b>4e</b> ).....                                                                             | 137        |
| B.3.7. Stability of (Ph) <sub>2</sub> C=P-PtBu <sub>2</sub> ( <b>3a</b> ) in water .....                                           | 138        |
| PART C. Crystallographic data .....                                                                                                | 139        |
| PART E. DFT calculations .....                                                                                                     | 143        |
| <b>E.1. General methods .....</b>                                                                                                  | <b>143</b> |
| <b>E.2. Philicity of selected atoms in 1, [(BDI*)Ti(Cl){η<sup>2</sup>-P(SiMe<sub>3</sub>)-PtBu<sub>2</sub>}] and ketones .....</b> | <b>149</b> |
| <b>E.3. Optimized structures and Cartesian coordinates.....</b>                                                                    | <b>150</b> |
| E.3.1. Substrates and by-products.....                                                                                             | 150        |
| E.3.2. Reaction of <b>1</b> with benzophenone leading to <b>3a</b> .....                                                           | 160        |
| E.3.3. Reaction of <b>1</b> with 9-fluorenone leading to <b>3b</b> .....                                                           | 168        |
| E.3.4. Reaction of <b>1</b> with 4-cyanobenzophenone leading to <b>Z-3c</b> .....                                                  | 176        |
| E.3.5. Reaction of <b>1</b> with 4-cyanobenzophenone leading to <b>E-3c</b> .....                                                  | 184        |
| E.3.6. Reaction of <b>1</b> with 4,4'-dicyanobenzophenone leading to <b>3d</b> .....                                               | 192        |
| E.3.7. Reaction of <b>1</b> with 4,4'-dimethoxybenzophenone leading to <b>3e</b> .....                                             | 200        |
| E.3.8. Reaction of <b>1</b> with <i>tert</i> -butyl phenyl ketone leading to <b>Z-3f</b> .....                                     | 209        |
| E.3.9. Reaction of <b>1</b> with <i>tert</i> -butyl phenyl ketone leading to <b>E-3f</b> .....                                     | 217        |
| E.3.10. Reaction of <b>1</b> with acetone leading to <b>3g</b> .....                                                               | 225        |
| E.3.11. Reaction of <b>1</b> with cyclohexanone leading to <b>3h</b> .....                                                         | 232        |
| E.3.12. Reaction of <b>1</b> with acetophenone leading to <b>Z-3i</b> .....                                                        | 239        |
| E.3.13. Reaction of <b>1</b> with acetophenone leading to <b>E-3i</b> .....                                                        | 247        |
| E.3.14. Reaction of <b>1</b> with cyclopropyl methyl ketone leading to <b>Z-3j</b> .....                                           | 254        |
| E.3.15. Reaction <b>1</b> with cyclopropyl methyl ketone leading to <b>E-3j</b> .....                                              | 262        |

|                                                                                                             |     |
|-------------------------------------------------------------------------------------------------------------|-----|
| E.3.16. Reaction of acetone with $t\text{Bu}_2\text{P-P}(\text{SiMe}_3)\text{Li}(\text{THF})_3$ .....       | 269 |
| E.3.17. Optimized structures of <b>4a-4e</b> .....                                                          | 273 |
| PART F. Experimental and theoretical UV-VIS spectra of phosphalkenes isolated in the solid state form ..... | 284 |
| PART G. References .....                                                                                    | 292 |

## PART A. Experimental section

### A.1. Materials and method

All synthetic procedures were performed under inert gas (Ar) and were carried out using mBraun glovebox and standard Schlenk techniques. All spectra in solution were recorded on Bruker AV400 MHz spectrometer (external standard tetramethylsilane for  $^1\text{H}$ ,  $^{13}\text{C}$ ; 85%  $\text{H}_3\text{PO}_4$  for  $^{31}\text{P}$ ). Melting point of the all crystalline products were measured on the Stuart SMP 30 apparatus. Elemental analysis for solid and liquid samples were recorded on Elementary Vario El Cube CHNS.  $[(\text{BDI}^*)\text{Ti}(\text{Cl})\{\eta^2\text{-P-P}t\text{Bu}_2\}]$  (**1**) and  $t\text{Bu}_2\text{P-P}(\text{SiMe}_3)\text{Li}\cdot 3\text{THF}$  (**2**), were prepared according to procedures in the literature.<sup>1-3</sup> All ketones and aldehydes were commercially purchased. THF and toluene were dried over  $\text{Na}/\text{Ph}_2\text{CO}$ , while pentane was dried over  $\text{Na}/\text{K}$  alloy. All solvents were distilled under argon atmosphere. Elemental analysis were recorded on Elementary Vario El Cube CHNS.

### A.2. General method for the phospho-Wittig reaction of $[(\text{BDI}^*)\text{Ti}(\text{Cl})\{\eta^2\text{-P-P}t\text{Bu}_2\}]$ (**1**) with selected ketones and aldehydes

To the  $[(\text{BDI}^*)\text{Ti}(\text{Cl})\{\eta^2\text{-P-P}t\text{Bu}_2\}]$  (**1**) (0.400 g, 0.591 mmol) dissolved in 15 mL of THF the appropriate amount of ketone or aldehyde in 5 mL of THF was dropwise added. The initial green solution of the titanium complex, after the right time for each reaction was changed. In the next step the solvent was evaporated and in results a slightly oily residue for each reaction was obtained.

#### A.2.1. Reaction of **1** with benzophenone

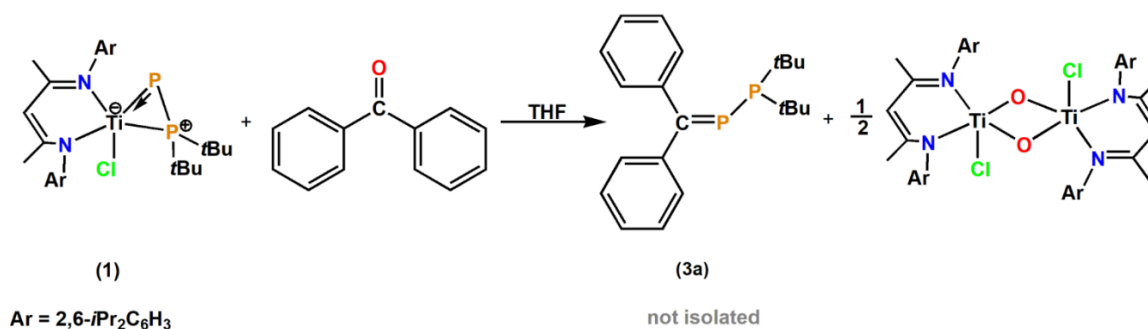

Benzophenone (0.108 g, 0.591 mmol); deep orange reaction solution after 3 months. An oily residue obtained after evaporation of the solvent was dissolved in  $\text{C}_6\text{D}_6$  and investigated by NMR spectroscopy.

$^{31}\text{P}\{^1\text{H}\}$  NMR (400 MHz,  $\text{C}_6\text{D}_6$ , 298 K)  $\delta$ : 277.32 (d,  $J_{\text{P-P}} = 228.9$  Hz,  $(\text{Ph})_2\text{C}=\text{P-P}t\text{Bu}_2$ , **3a**), 27.39 (d,  $J_{\text{P-P}} = 228.9$  Hz,  $(\text{Ph})_2\text{C}=\text{P-P}t\text{Bu}_2$ , **3a**) ppm.

$^{31}\text{P}\{^1\text{H}\}$ ,  $^1\text{H}$ ,  $^{13}\text{C}\{^1\text{H}\}$ -NMR spectra of isolated  $(\text{Ph})_2\text{C}=\text{P-P}t\text{Bu}_2$  (**3a**) see point A.3.1. page 20.

### A.2.2. Reaction of **1** with 9-fluorenone

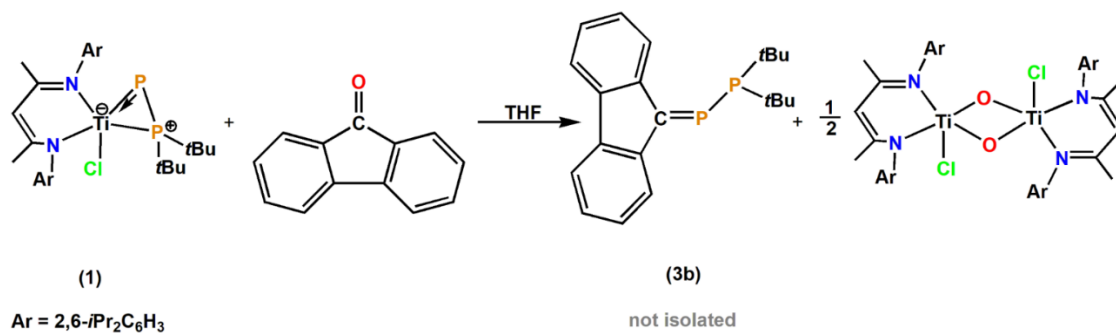

9-fluorenone (0.106 g, 0.591 mmol); red reaction solution after 24 hours. An oily residue obtained after evaporation of the solvent was dissolved in  $\text{C}_6\text{D}_6$  and investigated by NMR spectroscopy.

$^{31}\text{P}\{^1\text{H}\}$  NMR (400 MHz,  $\text{C}_6\text{D}_6$ , 298 K)  $\delta$ : 297.84 (d,  $J_{\text{P-P}} = 228.4$  Hz, (fluorenyl)C=P-P*t*Bu<sub>2</sub>, **3b**), 19.50 (s, *t*Bu<sub>2</sub>PH), 9.61 (d,  $J_{\text{P-P}} = 228.9$  Hz, (fluorenyl)C=P-P*t*Bu<sub>2</sub>, **3b**) ppm.

$^{31}\text{P}\{^1\text{H}\}$ ,  $^1\text{H}$ ,  $^{13}\text{C}\{^1\text{H}\}$  NMR spectra of isolated (fluorenyl)C=P-P*t*Bu<sub>2</sub> (**3b**) see point A.3.2. page 21.

### A.2.3. Reaction of 1 with 4-cyanobenzophenone

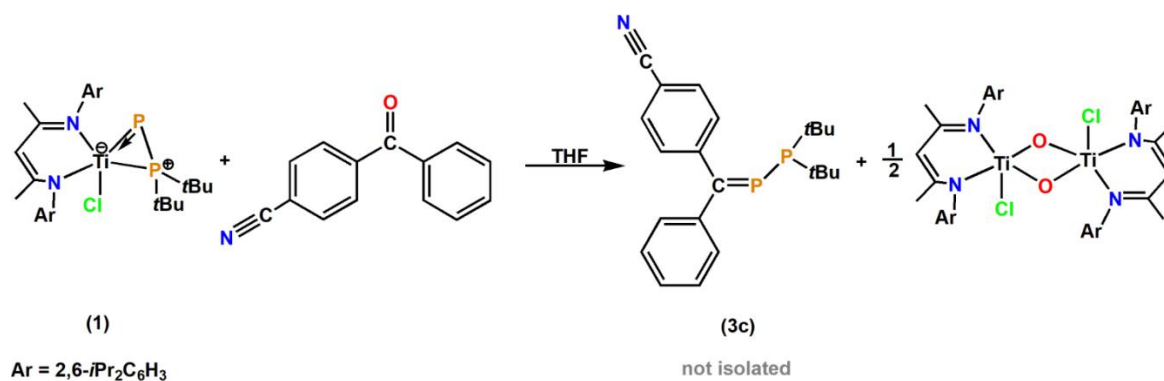

4-cyanobenzophenone (0.122 g, 0.591 mmol); yellow-red reaction solution after 3 months. An oily residue obtained after evaporation of the solvent was dissolved in C<sub>6</sub>D<sub>6</sub> and investigated by NMR spectroscopy.

<sup>31</sup>P{<sup>1</sup>H} NMR (400 MHz, C<sub>6</sub>D<sub>6</sub>, 298 K) δ: 843.47 (d, *J*<sub>P-P</sub> = 450.5 Hz, unreacted [(BDI\*)Ti(Cl){η<sup>2</sup>-P-P*t*Bu<sub>2</sub>}], 302.86 (d *J*<sub>P-P</sub> = 228.9 Hz, (Ph)(4-CN-Ph)C=P-P*t*Bu<sub>2</sub>, *E*-**3c**), 285.73 (d, *J*<sub>P-P</sub> = 228.9 Hz, (Ph)(4-CN-Ph)C=P-P*t*Bu<sub>2</sub>, *Z*-**3c**), 143.57 (d *J*<sub>P-P</sub> = 450.5 Hz, unreacted [(BDI\*)Ti(Cl){η<sup>2</sup>-P-P*t*Bu<sub>2</sub>}], 28.98 (d, *J*<sub>P-P</sub> = 228.9 Hz, (Ph)(4-CN-Ph)C=P-P*t*Bu<sub>2</sub>, *E*-**3c**), 27.81 (d, *J*<sub>P-P</sub> = 228.9 Hz, (Ph)(4-CN-Ph)C=P-P*t*Bu<sub>2</sub>, *Z*-**3c**) ppm.

<sup>31</sup>P{<sup>1</sup>H}, <sup>1</sup>H, <sup>13</sup>C{<sup>1</sup>H} NMR spectra of isolated (Ph)(4-CN-Ph)C=P-P*t*Bu<sub>2</sub> (**3c**) see point A.3.3. page 22.

A.2.4. Reaction of 1 with 4,4'-dicyanobenzophenone

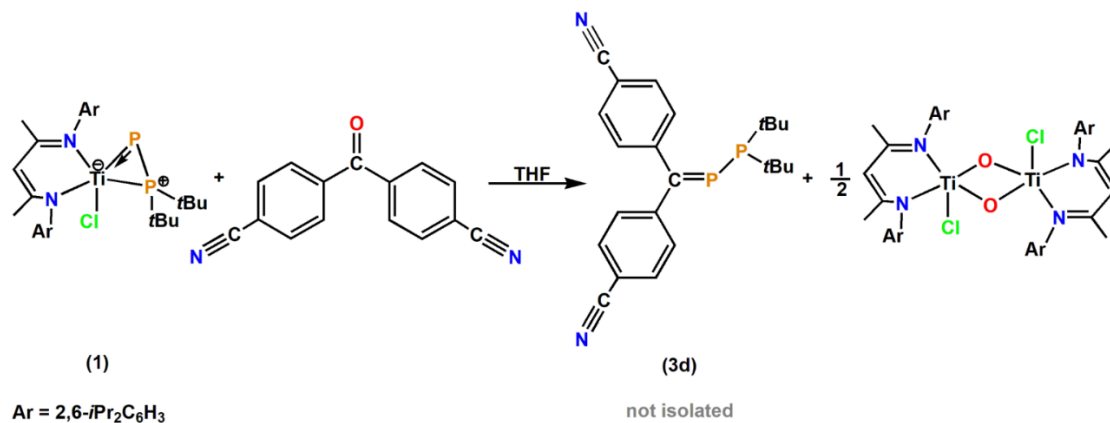

4,4'-dicyanobenzophenone (0.137 g, 0.591 mmol); yellow-red reaction solution after 3 months. An oily residue obtained after evaporation of the solvent was dissolved in C<sub>6</sub>D<sub>6</sub> and investigated by NMR spectroscopy.

<sup>31</sup>P{<sup>1</sup>H} NMR (400 MHz, C<sub>6</sub>D<sub>6</sub>, 298 K) δ: 843.85 (d, *J*<sub>P-P</sub> = 450.5 Hz, unreacted [(BDI\*)Ti(Cl){η<sup>2</sup>-P-P*t*Bu<sub>2</sub>}]}, 312.22 (d, *J*<sub>P-P</sub> = 232.5 Hz, (4-CN-Ph)<sub>2</sub>C=P-P*t*Bu<sub>2</sub>, **3d**), 143.56 (d, *J*<sub>P-P</sub> = 450.5 Hz, [(BDI\*)Ti(Cl){η<sup>2</sup>-P-P*t*Bu<sub>2</sub>}]}, 29.54 (d, *J*<sub>P-P</sub> = 232.5 Hz, (4-CN-Ph)<sub>2</sub>C=P-P*t*Bu<sub>2</sub>, **3d**), 19.51 (s, *t*Bu<sub>2</sub>PH) ppm.

<sup>31</sup>P{<sup>1</sup>H}, <sup>1</sup>H, <sup>13</sup>C{<sup>1</sup>H} NMR spectra of isolated (4-CN-Ph)<sub>2</sub>C=P-P*t*Bu<sub>2</sub> (**3d**) see point A.3.4. page 23.



### A.2.5. Reaction of 1 with 4,4'-dimethoxybenzophenone

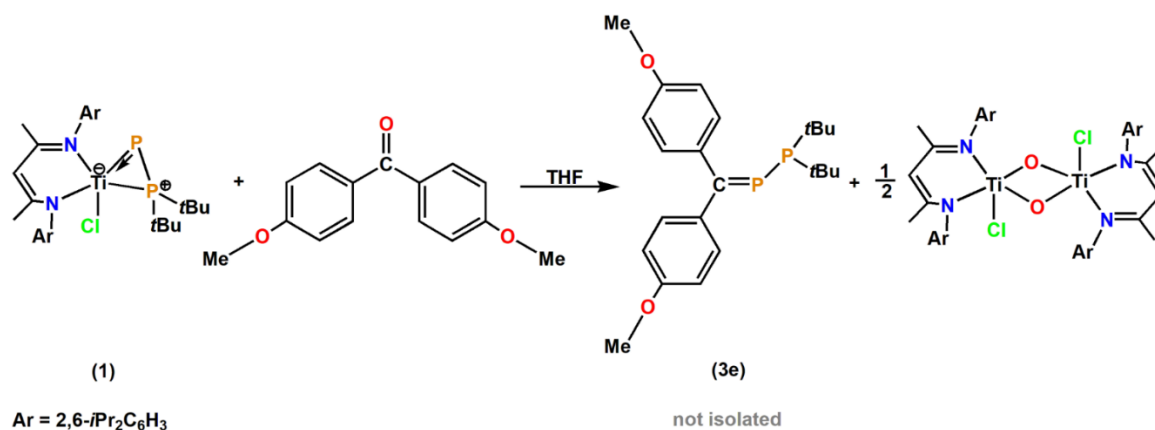

4,4'-dimethoxybenzophenone (0.143 g, 0.591 mmol); yellow-red reaction solution after 3 months. An oily residue obtained after evaporation of the solvent was dissolved in  $\text{C}_6\text{D}_6$  and investigated by NMR spectroscopy.

$^{31}\text{P}\{^1\text{H}\}$  NMR (400 MHz,  $\text{C}_6\text{D}_6$ , 298 K)  $\delta$ : 844.38 (d,  $J_{\text{P-P}} = 450.5$  Hz, unreacted  $[(\text{BDI}^*)\text{Ti}(\text{Cl})\{\eta^2\text{-P-}t\text{Bu}_2\}]$ ), 257.68 (d,  $J_{\text{P-P}} = 228.9$  Hz,  $(4\text{-MeO-Ph})_2\text{C}=\text{P-}t\text{Bu}_2$ , **3e**), 143.78 (d,  $J_{\text{P-P}} = 450.5$  Hz,  $[(\text{BDI}^*)\text{Ti}(\text{Cl})\{\eta^2\text{-P-}t\text{Bu}_2\}]$ ), 28.38 (d,  $J_{\text{P-P}} = 228.9$  Hz,  $(4\text{-MeO-Ph})_2\text{C}=\text{P-}t\text{Bu}_2$ , **3e**), 19.66 (s,  $t\text{Bu}_2\text{PH}$ ) ppm.

$^{31}\text{P}\{^1\text{H}\}$ ,  $^1\text{H}$ ,  $^{13}\text{C}\{^1\text{H}\}$  NMR spectra of isolated  $(4\text{-MeO-Ph})_2\text{C}=\text{P-}t\text{Bu}_2$  (**3e**) see point A.3.5. page 24.

### A.2.6. Reaction of **1** with *tert*-butyl phenyl ketone

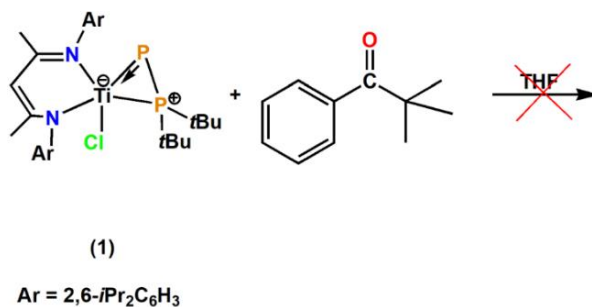

*Tert*-butyl phenyl ketone (0.099 mL, 0.591 mmol, 0.970 g/mL); still green reaction solution after 3 months. An oily residue obtained after evaporation of the solvent was dissolved in C<sub>6</sub>D<sub>6</sub> and investigated by NMR spectroscopy.

<sup>31</sup>P{<sup>1</sup>H} NMR (400 MHz, C<sub>6</sub>D<sub>6</sub>, 298 K) δ: 838.89 (d, *J*<sub>P-P</sub> = 450.5 Hz, unreacted [(BDI\*)Ti(Cl){η<sup>2</sup>-P-P*t*Bu<sub>2</sub>}]}, 142.05 (d, *J*<sub>P-P</sub> = 450.5 Hz, unreacted [(BDI\*)Ti(Cl){η<sup>2</sup>-P-P*t*Bu<sub>2</sub>}]}, 19.56 (s, *t*Bu<sub>2</sub>PH) ppm.

### A.2.7. Reaction of **1** with acetone

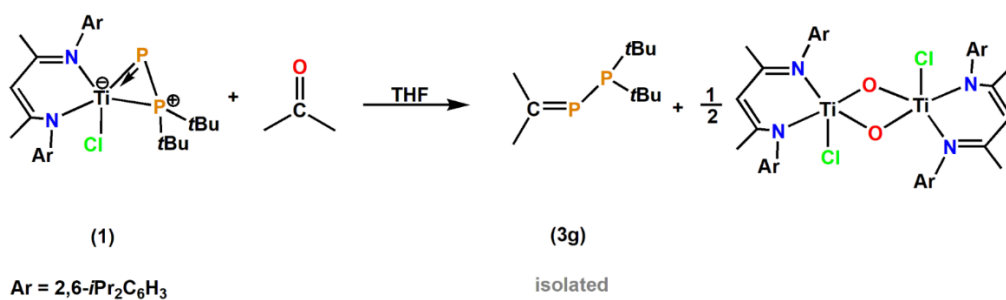

Acetone (0.044 mL, 0.591 mmol, 0.784 g/mL); dark yellow reaction solution after 24 hours. An oily residue obtained after evaporation of the solvent was distilled using the Kugelrohr apparatus (125°C, 0.01 Torr), finally resulting clear yellow oil characterized as (Me)<sub>2</sub>C=P-P*t*Bu<sub>2</sub> (**3g**) (0.100 g, yield: 72%).

<sup>31</sup>P{<sup>1</sup>H} NMR data from the reaction mixture (400 MHz, C<sub>6</sub>D<sub>6</sub>, 298 K) δ: 234.73 (d, *J*<sub>P-P</sub> = 228.9 Hz, (Me)<sub>2</sub>C=P-P*t*Bu<sub>2</sub>), 23.14 (d, *J*<sub>P-P</sub> = 228.9 Hz, (Me)<sub>2</sub>C=P-P*t*Bu<sub>2</sub>) ppm.

The <sup>31</sup>P{<sup>1</sup>H}, <sup>1</sup>H and <sup>13</sup>C{<sup>1</sup>H}-NMR shifts of isolated **3g** are analogical to these presented in our earlier publication.<sup>4</sup>

### A.2.8. Reaction of **1** with cyclohexanone

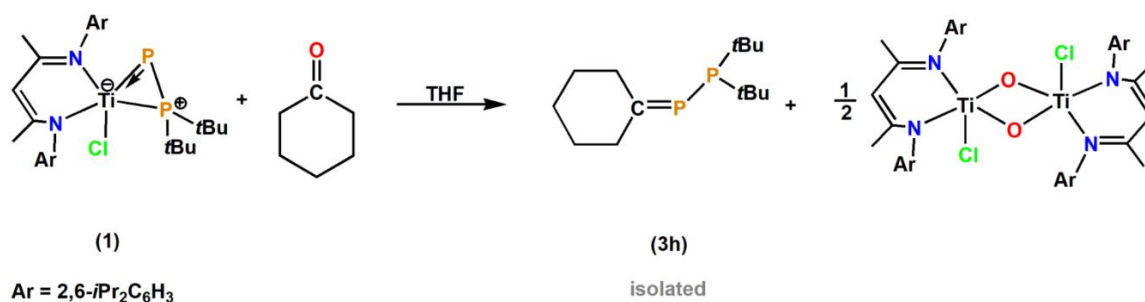

Cyclohexanone (0.061 mL, 0.591 mmol, 0.948 g/mL); dark yellow reaction solution after 24 hours. An oily residue obtained after evaporation of the solvent was distilled using the Kugelrohr apparatus (130°C, 0.01 Torr) finally resulting clear yellow oil characterized as  $(\text{CH}_2)_5\text{C}=\text{P}-\text{P}t\text{Bu}_2$  (**3h**) (0.09 g, yield: 55%).

$^{31}\text{P}\{^1\text{H}\}$  NMR data from the reaction mixture (400 MHz,  $\text{C}_6\text{D}_6$ , 298 K)  $\delta$ : 221.02 (d,  $J_{\text{P-P}} = 228.8$  Hz,  $(\text{CH}_2)_5\text{C}=\text{P}-\text{P}t\text{Bu}_2$ ), 19.51 (s,  $t\text{Bu}_2\text{PH}$ ), 17.76 (d,  $J_{\text{P-P}} = 228.8$  Hz,  $(\text{CH}_2)_5\text{C}=\text{P}-\text{P}t\text{Bu}_2$ ) ppm.

The  $^{31}\text{P}\{^1\text{H}\}$ ,  $^1\text{H}$  and  $^{13}\text{C}\{^1\text{H}\}$ -NMR shifts of isolated **3h** are analogical to these presented in our earlier publication.<sup>5</sup>

### A.2.9. Reaction of **1** with acetophenone

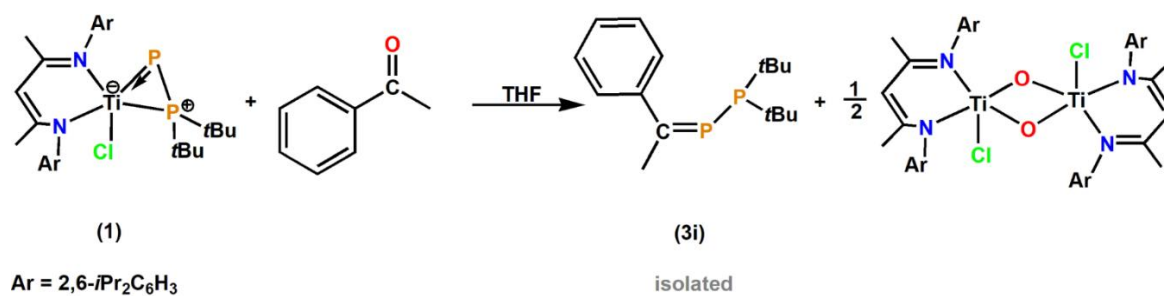

Acetophenone (0.069 mL, 0.591 mmol, 1.030 g/mL); dark yellow reaction solution after 24 hours. An oily residue obtained after evaporation of the solvent was distilled using the Kugelrohr apparatus (160°C, 0.01 Torr) finally resulting yellow oil characterized as (Ph)MeC=P–PtBu<sub>2</sub> (**3i**) (0.09 g, yield: 55%).

<sup>31</sup>P{<sup>1</sup>H} NMR data from the reaction mixture (400 MHz, C<sub>6</sub>D<sub>6</sub>, 298 K) δ: 263.63 (d, *J*<sub>P-P</sub> = 234.9 Hz, (Ph)MeC=P–PtBu<sub>2</sub>, *E*-**3i**), 253.06 (d, *J*<sub>P-P</sub> = 222.8 Hz, (Ph)MeC=P–PtBu<sub>2</sub>, *Z*-**3i**), 24.65 (d, *J*<sub>P-P</sub> = 222.8 Hz, (Ph)MeC=P–PtBu<sub>2</sub>, *Z*-**3i**), 21.91 (d, *J*<sub>P-P</sub> = 234.9 Hz, (Ph)MeC=P–PtBu<sub>2</sub>, *E*-**3i**), 19.65 (s, *t*Bu<sub>2</sub>PH) ppm.

The <sup>31</sup>P{<sup>1</sup>H}, <sup>1</sup>H and <sup>13</sup>C{<sup>1</sup>H}-NMR shifts of isolated **3i** are analogical to these presented in our earlier publication.<sup>5</sup>

### A.2.10. Reaction of **1** with cyclopropyl methyl ketone

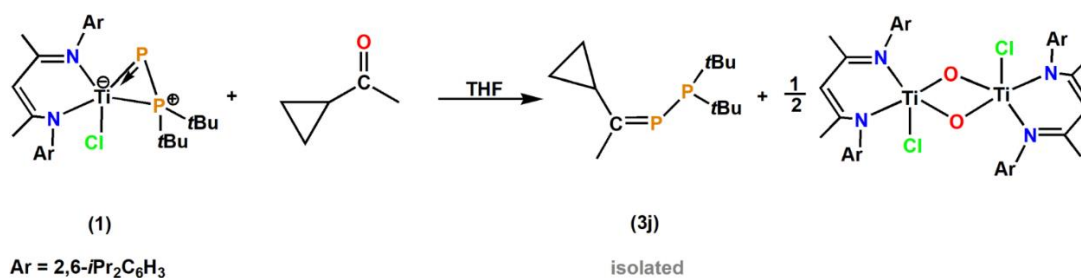

Cyclopropyl methyl ketone (0.059 mL, 0.591 mmol, 0.849 g/mL); orange reaction solution after 24 hours. An oily residue obtained after evaporation of the solvent was distilled using the Kugelrohr apparatus (140°C, 0.01 Torr) finally resulting clear dark yellow oil characterized as (*cyclo*-CH<sub>2</sub>CH<sub>2</sub>CH)(Me)C=P-PtBu<sub>2</sub> (**3j**) (0.094 g, yield: 61%). Calculated elemental analysis (%) for C<sub>13</sub>H<sub>26</sub>P<sub>2</sub>: C, 63.91; H, 10.73. Found (conducted for oil): C, 63.65; H, 10.94.

<sup>1</sup>H NMR (400 MHz, C<sub>6</sub>D<sub>6</sub>, 298 K) δ: 3.64 (broad m, 1H, (*cyclo*-CH<sub>2</sub>CH<sub>2</sub>CH)(Me)C=P-PtBu<sub>2</sub>, **Z-3j**), 2.29 (ddd, 3H, *J*<sub>P-H</sub> = 10.8 Hz, *J*<sub>H-H</sub> = 1.3 Hz, *J*<sub>P-H</sub> = 0.4 Hz, (*cyclo*-CH<sub>2</sub>CH<sub>2</sub>CH)(Me)C=P-PtBu<sub>2</sub>, **E-3j**), 2.04 (broad m, 1H, (*cyclo*-CH<sub>2</sub>CH<sub>2</sub>CH)(Me)C=P-PtBu<sub>2</sub>, **E-3j**), 1.73 (dd, 3H, *J*<sub>P-H</sub> = 21.9 Hz, *J*<sub>PH</sub> = 1.6 Hz, (*cyclo*-CH<sub>2</sub>CH<sub>2</sub>CH)(Me)C=P-PtBu<sub>2</sub>, **Z-3j**), 1.24 (d, 18H, *J*<sub>P-H</sub> = 11.2 Hz, (*cyclo*-CH<sub>2</sub>CH<sub>2</sub>CH)(Me)C=P-PtBu<sub>2</sub>, **E-3j**), 1.17 (d, 18H, *J*<sub>P-H</sub> = 11.2 Hz, (*cyclo*-CH<sub>2</sub>CH<sub>2</sub>CH)(Me)C=P-PtBu<sub>2</sub>, **Z-3j**), 0.74 (broad m, 2H, (*cyclo*-CH<sub>2</sub>CH<sub>2</sub>CH)(Me)C=P-PtBu<sub>2</sub>, **Z-3j**), 0.60 (broad m, 2H, (*cyclo*-CH<sub>2</sub>CH<sub>2</sub>CH)(Me)C=P-PtBu<sub>2</sub>, **Z-3j**), 0.53 ppm, (broad m, 2H, (*cyclo*-CH<sub>2</sub>CH<sub>2</sub>CH)(Me)C=P-PtBu<sub>2</sub>, **E-3j**), 0.50 (broad m, 2H, (*cyclo*-CH<sub>2</sub>CH<sub>2</sub>CH)(Me)C=P-PtBu<sub>2</sub>, **E-3j**) ppm;

<sup>13</sup>C{<sup>1</sup>H} NMR (400 MHz, C<sub>6</sub>D<sub>6</sub>, 298 K) δ: 213.28 (dd, *J*<sub>P-C</sub> = 53.6 Hz, *J*<sub>P-C</sub> = 14.5 Hz, (*cyclo*-CH<sub>2</sub>CH<sub>2</sub>CH)(Me)C=P-PtBu<sub>2</sub>, **E-3j**), 210.41 (dd, *J*<sub>P-C</sub> = 55.4 Hz, *J*<sub>P-C</sub> = 11.8 Hz, (*cyclo*-CH<sub>2</sub>CH<sub>2</sub>CH)(Me)C=P-PtBu<sub>2</sub>, **Z-3j**), 33.36 (dd, *J*<sub>P-C</sub> = 9.1 Hz, *J*<sub>P-C</sub> = 4.5 Hz, (*cyclo*-CH<sub>2</sub>CH<sub>2</sub>CH)(Me)C=P-P{C(CH<sub>3</sub>)<sub>3</sub>}<sub>2</sub>, **E-3j**), 33.36 (dd, *J*<sub>P-C</sub> = 9.1 Hz, *J*<sub>P-C</sub> = 4.5 Hz, (*cyclo*-CH<sub>2</sub>CH<sub>2</sub>CH)(Me)C=P-P{C(CH<sub>3</sub>)<sub>3</sub>}<sub>2</sub>, **E-3j**), 31.15 (dd, *J*<sub>P-C</sub> = 10.9 Hz, *J*<sub>P-C</sub> = 5.4 Hz, (*cyclo*-CH<sub>2</sub>CH<sub>2</sub>CH)(Me)C=P-P{C(CH<sub>3</sub>)<sub>3</sub>}<sub>2</sub>, **Z-3j**), 31.01 (dd, *J*<sub>P-C</sub> = 10.9 Hz, *J*<sub>P-C</sub> = 4.5 Hz, (*cyclo*-CH<sub>2</sub>CH<sub>2</sub>CH)(Me)C=P-P{C(CH<sub>3</sub>)<sub>3</sub>}<sub>2</sub>, **Z-3j**), 26.45 (dd, *J*<sub>P-C</sub> = 45.4 Hz, *J*<sub>P-C</sub> = 5.4 Hz, (*cyclo*-CH<sub>2</sub>CH<sub>2</sub>CH)(Me)C=P-PtBu<sub>2</sub>, **E-3j**), 25.19 (dd, *J*<sub>P-C</sub> = 29.1 Hz, *J*<sub>P-C</sub> = 15.4 Hz, (*cyclo*-CH<sub>2</sub>CH<sub>2</sub>CH)(CH<sub>3</sub>)C=P-PtBu<sub>2</sub>, **E-3j**), 24.43 (dd, *J*<sub>P-C</sub> = 38.1 Hz, *J*<sub>P-C</sub> = 17.2 Hz, (*cyclo*-CH<sub>2</sub>CH<sub>2</sub>CH)(CH<sub>3</sub>)C=P-PtBu<sub>2</sub>, **Z-3j**), 23.63 (dd, *J*<sub>P-C</sub> = 45.4 Hz, *J*<sub>P-C</sub> = 3.6 Hz, (*cyclo*-CH<sub>2</sub>CH<sub>2</sub>CH)(Me)C=P-PtBu<sub>2</sub>, **Z-3j**), 9.52 (d, *J*<sub>P-C</sub> = 2.7 Hz, (*cyclo*-CH<sub>2</sub>CH<sub>2</sub>CH)(Me)C=P-PtBu<sub>2</sub>, **Z-3j**), 9.37 (d, *J*<sub>P-C</sub> = 12.7 Hz, (*cyclo*-CH<sub>2</sub>CH<sub>2</sub>CH)(Me)C=P-PtBu<sub>2</sub>, **E-3j**) ppm;

<sup>31</sup>P{<sup>1</sup>H} NMR (400 MHz, C<sub>6</sub>D<sub>6</sub>, 298 K) δ: 232.48 (d, *J*<sub>P-P</sub> = 232.9 Hz, (*cyclo*-CH<sub>2</sub>CH<sub>2</sub>CH)(Me)C=P-PtBu<sub>2</sub>, **Z-3j**), 225.87 (d, *J*<sub>P-P</sub> = 232.9 Hz, (*cyclo*-CH<sub>2</sub>CH<sub>2</sub>CH)(Me)C=P-PtBu<sub>2</sub>, **E-3j**), 18.52 (d, *J*<sub>P-P</sub> = 232.9 Hz, (*cyclo*-CH<sub>2</sub>CH<sub>2</sub>CH)(Me)C=P-PtBu<sub>2</sub>, **Z-3j**), 17.00 (d, *J*<sub>P-P</sub> = 232.9 Hz, (*cyclo*-CH<sub>2</sub>CH<sub>2</sub>CH)(Me)C=P-PtBu<sub>2</sub>, **E-3j**) ppm.

### A.2.11. Reaction of 1 with isobutyraldehyde

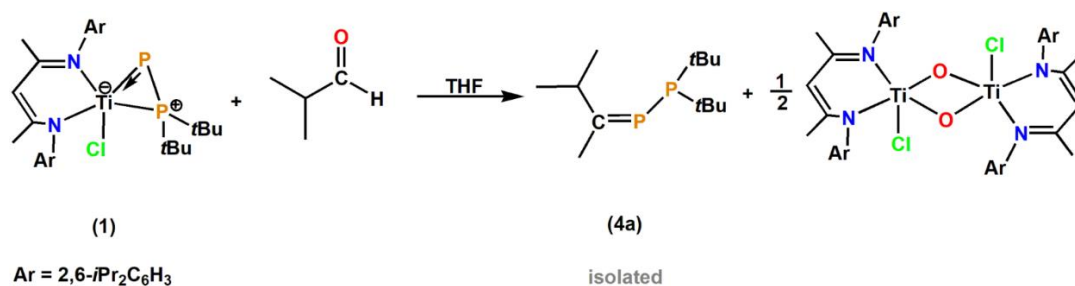

Isobutyraldehyde (0.054 mL, 0.591 mmol, 0.790 g/mL); pale orange reaction solution after 24 hours. An oily residue obtained after evaporation of the solvent was distilled using the Kugelrohr apparatus (160°C, 0.01 Torr) finally resulting clear yellow oil characterized as  $\{(Me)_2CH\}(H)C=P-PtBu_2$  (**4a**) (0.110 g, yield: 58%). Calculated elemental analysis (%) for C<sub>12</sub>H<sub>26</sub>P<sub>2</sub>: C, 62.05; H, 11.28 N. Found (conducted for oil): C, 61.95; H, 11.51.

<sup>1</sup>H NMR (400 MHz, C<sub>6</sub>D<sub>6</sub>, 298 K)  $\delta$ : 9.49 (ddd, 1H,  $J_{P-H} = 24.1$  Hz,  $J_{P-H} = 12.0$  Hz,  $J_{P-H} = 8.1$  Hz,  $\{(Me)_2CH\}(H)C=P-PtBu_2$ , **E-4a**), 8.42 (ddd, 1H,  $J_{P-H} = 36.1$  Hz,  $J_{H-H} = 20.9$  Hz,  $J_{P-H} = 8.0$  Hz,  $\{(Me)_2CH\}(H)C=P-PtBu_2$ , **Z-4a**), 4.12 (br. m, 1H,  $J_{H-H} = 6.7$  Hz,  $\{(Me)_2CH\}(H)C=P-PtBu_2$ , **Z-4a**), 3.55 (q, THF protons), 2.77 (br. m, 1H,  $J_{H-H} = 6.7$  Hz,  $\{(Me)_2CH\}(H)C=P-PtBu_2$ , **E-4a**), 1.39 (q, THF protons), 1.25 (d, 18H,  $J_{P-H} = 11.3$  Hz,  $\{(Me)_2CH\}(H)C=P-PtBu_2$ , **E-4a**), 1.23 (d, 18H,  $J_{P-H} = 11.2$  Hz,  $\{(Me)_2CH\}(H)C=P-PtBu_2$ , **Z-4a**), 1.04 (dd, 6H,  $J_{H-H} = 6.7$  Hz,  $J_{P-H} = 0.8$  Hz,  $\{(Me)_2CH\}(H)C=P-PtBu_2$ , **E-4a**), 0.94 (br. d, 6H,  $J_{H-H} = 6.7$  Hz,  $\{(Me)_2CH\}(H)C=P-PtBu_2$ , **Z-4a**) ppm;

<sup>13</sup>C{<sup>1</sup>H} NMR (400 MHz, C<sub>6</sub>D<sub>6</sub>, 298 K)  $\delta$ : 213.12 (dd,  $J_{P-C} = 49.0$  Hz,  $J_{P-C} = 33.6$  Hz,  $\{(Me)_2CH\}(H)C=P-PtBu_2$ , **E-4a**), 38.50 (dd,  $J_{P-C} = 19.9$  Hz,  $J_{P-C} = 13.6$  Hz,  $\{(Me)_2CH\}(H)C=P-PtBu_2$ , **E-4a**), 32.51 (dd,  $J_{P-C} = 28.2$  Hz,  $J_{P-C} = 2.7$  Hz,  $\{(Me)_2CH\}(H)C=P-P\{C(CH_3)_3\}_2$ , **E-4a**), 31.04 (dd,  $J_{P-C} = 19.9$  Hz,  $J_{P-C} = 5.4$  Hz,  $\{(Me)_2CH\}(H)C=P-P\{C(CH_3)_3\}_2$ , **E-4a**), 23.02 (d,  $J_{P-C} = 12.7$  Hz,  $\{(Me)_2CH\}(H)C=P-PtBu_2$ , **E-4a**) ppm;

<sup>31</sup>P{<sup>1</sup>H} NMR (400 MHz, C<sub>6</sub>D<sub>6</sub>, 298 K)  $\delta$ : 254.39 (d,  $J_{P-P} = 220.8$  Hz,  $\{(Me)_2CH\}(H)C=P-PtBu_2$ , **E-4a**), 249.40 (d,  $J_{P-P} = 212.8$  Hz,  $\{(Me)_2CH\}(H)C=P-PtBu_2$ , **Z-4a**), 52.83 (d,  $J_{P-P} = 220.8$  Hz,  $\{(Me)_2CH\}(H)C=P-PtBu_2$ , **E-4a**), 12.85 (d,  $J_{P-P} = 212.8$  Hz,  $\{(Me)_2CH\}(H)C=P-PtBu_2$ , **Z-4a**) ppm.

4bA.2.12. Reaction of **1** with cyclohexanecarboxaldehyde

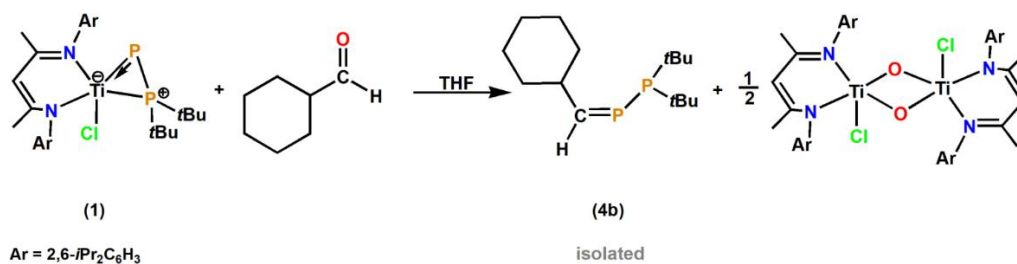

Cyclohexanecarboxaldehyde (0.072 mL, 0.591 mmol, 0.926 g/mL); orange reaction solution after 24 hours. An oily residue obtained after evaporation of the solvent was distilled using the Kugelrohr apparatus (165°C, 0.01 Torr) finally resulting clear yellow oil characterized as {*cyclo*-(CH<sub>2</sub>)<sub>4</sub>CH}(H)C=P-P*t*Bu<sub>2</sub> (**4b**) (0.085 g, yield: 53%). Calculated elemental analysis (%) for C<sub>15</sub>H<sub>30</sub>P<sub>2</sub>: C, 66.15; H, 11.10 N. Found (conducted for oil): C, 66.03; H, 11.19.

<sup>1</sup>H NMR (400 MHz, C<sub>6</sub>D<sub>6</sub>, 298 K) δ: 9.44 (ddd, 1H, *J*<sub>P-H</sub> = 22.7 Hz, *J*<sub>P-H</sub> = 14.2 Hz, *J*<sub>H-H</sub> = 8.4 Hz, {*cyclo*-(CH<sub>2</sub>)<sub>4</sub>CH}(H)C=P-P*t*Bu<sub>2</sub>, **E-4b**), 8.49 (ddd, 1H, *J*<sub>P-H</sub> = 31.9 Hz, *J*<sub>P-H</sub> = 21.5 Hz, *J*<sub>H-H</sub> = 10.9 Hz, {*cyclo*-(CH<sub>2</sub>)<sub>4</sub>CH}(H)C=P-P*t*Bu<sub>2</sub>, **Z-4b**), 2.51 (broad m, 1H, {*cyclo*-(CH<sub>2</sub>)<sub>4</sub>CH}(H)C=P-P*t*Bu<sub>2</sub>, **E-4b**), 1.83 (broad m, 2H, {*cyclo*-(CH<sub>2</sub>)<sub>4</sub>CH}(H)C=P-P*t*Bu<sub>2</sub>, **E-4b**), 1.65, (broad m, 2H, {*cyclo*-(CH<sub>2</sub>)<sub>4</sub>CH}(H)C=P-P*t*Bu<sub>2</sub>, **E-4b**), 1.29 (d, 18H, *J*<sub>P-H</sub> = 11.1 Hz, {*cyclo*-(CH<sub>2</sub>)<sub>4</sub>CH}(H)C=P-P*t*Bu<sub>2</sub>, **E-4b**), 1.19 (broad m, 6H, {*cyclo*-(CH<sub>2</sub>)<sub>4</sub>CH}(H)C=P-P*t*Bu<sub>2</sub>, **E-4b**) ppm;

<sup>13</sup>C{<sup>1</sup>H} NMR (400 MHz, C<sub>6</sub>D<sub>6</sub>, 298 K) δ: 211.64 (dd, *J*<sub>P-C</sub> = 48.2 Hz, *J*<sub>P-C</sub> = 34.6 Hz, {*cyclo*-(CH<sub>2</sub>)<sub>4</sub>CH}(H)C=P-P*t*Bu<sub>2</sub>, **E-4b**), 203.01 (dd, *J*<sub>P-C</sub> = 55.7 Hz, *J*<sub>P-C</sub> = 14.2 Hz, {*cyclo*-(CH<sub>2</sub>)<sub>4</sub>CH}(H)C=P-P*t*Bu<sub>2</sub>, **Z-4b**), 48.07 (dd, *J*<sub>P-C</sub> = 18.6 Hz, *J*<sub>P-C</sub> = 13.4 Hz, {*cyclo*-(CH<sub>2</sub>)<sub>4</sub>CH}(H)C=P-P*t*Bu<sub>2</sub>, **E-4b**), 33.98 (s, {*cyclo*-(CH<sub>2</sub>)<sub>4</sub>CH}(H)C=P-P*t*Bu<sub>2</sub>, **E-4b**), 33.85 (s, {*cyclo*-(CH<sub>2</sub>)<sub>4</sub>CH}(H)C=P-P*t*Bu<sub>2</sub>, **E-4b**), 33.27 (s, {*cyclo*-(CH<sub>2</sub>)<sub>4</sub>CH}(H)C=P-P*t*Bu<sub>2</sub>, **Z-4b**), 33.18 (s, {*cyclo*-(CH<sub>2</sub>)<sub>4</sub>CH}(H)C=P-P*t*Bu<sub>2</sub>, **Z-4b**), 32.46 (dd, *J*<sub>P-C</sub> = 28.2 Hz, *J*<sub>P-C</sub> = 2.8 Hz, {*cyclo*-(CH<sub>2</sub>)<sub>4</sub>CH}(H)C=P-P{C(CH<sub>3</sub>)<sub>3</sub>}<sub>2</sub>, **E-4b**), 31.02 (dd, *J*<sub>P-C</sub> = 13.8 Hz, *J*<sub>P-C</sub> = 5.0 Hz, {*cyclo*-(CH<sub>2</sub>)<sub>4</sub>CH}(H)C=P-P{C(CH<sub>3</sub>)<sub>3</sub>}<sub>2</sub>, **E-4b**), 30.18 (dd, *J*<sub>P-C</sub> = 14.8 Hz, *J*<sub>P-C</sub> = 5.42 Hz, {*cyclo*-(CH<sub>2</sub>)<sub>4</sub>CH}(H)C=P-P{C(CH<sub>3</sub>)<sub>3</sub>}<sub>2</sub>, **Z-4b**), 25.86 (s, {*cyclo*-(CH<sub>2</sub>)<sub>4</sub>CH}(H)C=P-P*t*Bu<sub>2</sub>, **E-4b**), 25.84 (s, {*cyclo*-(CH<sub>2</sub>)<sub>4</sub>CH}(H)C=P-P*t*Bu<sub>2</sub>, **E-4b**) ppm;

<sup>31</sup>P{<sup>1</sup>H} NMR (400 MHz, C<sub>6</sub>D<sub>6</sub>, 298 K) δ: 256.25 (d, *J*<sub>PP</sub> = 220.8 Hz, {*cyclo*-(CH<sub>2</sub>)<sub>4</sub>CH}(H)C=P-P*t*Bu<sub>2</sub>, **E-4b**), 251.24 (d, *J*<sub>PP</sub> = 212.8 Hz, {*cyclo*-(CH<sub>2</sub>)<sub>4</sub>CH}(H)C=P-P*t*Bu<sub>2</sub>, **Z-4b**), 52.23 (d, *J*<sub>PP</sub> = 220.8 Hz, {*cyclo*-(CH<sub>2</sub>)<sub>4</sub>CH}(H)C=P-P*t*Bu<sub>2</sub>, **E-4b**), 13.17 (d, *J*<sub>PP</sub> = 212.8 Hz, {*cyclo*-(CH<sub>2</sub>)<sub>4</sub>CH}(H)C=P-P*t*Bu<sub>2</sub>, **Z-4b**) ppm.



A.2.13. Reaction of **1** with *p*-tolualdehyde

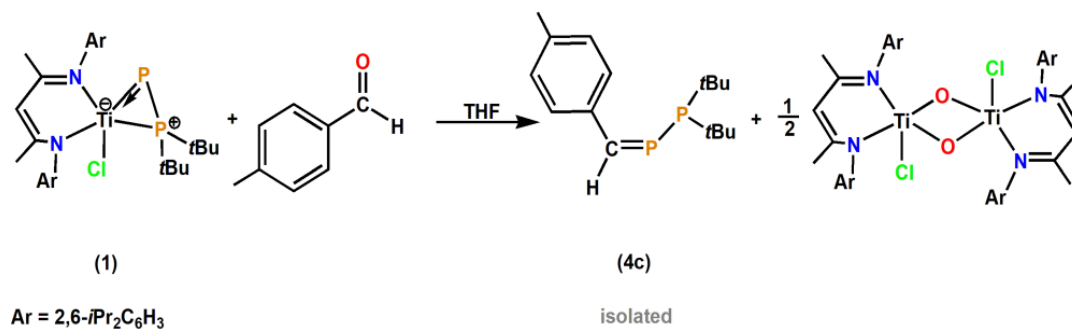

*p*-Tolualdehyde (0.065 mL, 0.591 mmol, 1.019 g/mL); pale orange reaction solution after 24 hours. An oily residue obtained after evaporation of the solvent was distilled using the Kugelrohr apparatus (150°C, 0.01 Torr) finally resulting clear yellow oil characterized as (*p*-Me-Ph)(H)C=P-*Pt*Bu<sub>2</sub> (**4c**) (0.115 g; yield: 69%). Calculated elemental analysis (%) for C<sub>16</sub>H<sub>26</sub>P<sub>2</sub>: C, 68.55 H, 9.35 N. Found (conducted for oil): C, 68.45; H, 9.58.

<sup>1</sup>H NMR (400 MHz, 298 K, C<sub>6</sub>D<sub>6</sub>) only *E* isomer visible; δ: 10.16 (dd, 1H, *J*<sub>P-H</sub> = 22.7 Hz, *J*<sub>P-H</sub> = 13.6 Hz, (*p*-Me-Ph)(H)C=P-*Pt*Bu<sub>2</sub>, **E-4c**), 7.56 (dd, 2H, *J*<sub>P-H</sub> = 7.6 Hz, *J*<sub>P-H</sub> = 2.7 Hz, (*p*-Me-Ph)(H)C=P-*Pt*Bu<sub>2</sub>, *o*-H<sub>Ar</sub>, **E-4c**), 6.83 (d, 2H, *J*<sub>P-H</sub> = 7.9 Hz, (*p*-Me-Ph)(H)C=P-*Pt*Bu<sub>2</sub>, *m*-H<sub>Ar</sub>, **E-4c**), 1.97 (d, 3H, *J*<sub>P-H</sub> = 1.9 Hz, (*p*-Me-Ph)(H)C=P-*Pt*Bu<sub>2</sub>, **E-4c**), 1.28 (d, 18H, *J*<sub>P-H</sub> = 11.1 Hz, (*p*-Me-Ph)(H)C=P-*Pt*Bu<sub>2</sub>, **E-4c**) ppm;

<sup>13</sup>C{<sup>1</sup>H} NMR (400 MHz, 298 K, C<sub>6</sub>D<sub>6</sub>) only *E* isomer visible; δ: 197.67 (dd, *J*<sub>P-C</sub> = 45.1 Hz, *J*<sub>P-C</sub> = 39.2 Hz, (*p*-Me-Ph)(H)C=P-*Pt*Bu<sub>2</sub>, **E-4c**), 129.30 (d, *J*<sub>P-C</sub> = 2.6 Hz, (*p*-Me-Ph)(H)C=P-*Pt*Bu<sub>2</sub>, *m*-C<sub>Ar</sub>, **E-4c**), 126.73 (d, *J*<sub>P-C</sub> = 19.5 Hz, (*p*-Me-Ph)(H)C=P-*Pt*Bu<sub>2</sub>, *o*-C<sub>Ar</sub>, **E-4c**), 33.10 (dd, *J*<sub>P-C</sub> = 27.7 Hz, *J*<sub>P-C</sub> = 2.5 Hz, (*p*-Me-Ph)(H)C=P-*Pt*Bu<sub>2</sub>, **E-4c**), 31.15 (dd, *J*<sub>P-C</sub> = 13.8 Hz, *J*<sub>P-C</sub> = 5.1 Hz, (*p*-Me-Ph)(H)C=P-*Pt*Bu<sub>2</sub>, **E-4c**), 20.95 (d, *J*<sub>P-C</sub> = 1.0 Hz, (*p*-Me-Ph)(H)C=P-*Pt*Bu<sub>2</sub>, **E-4c**) ppm;

<sup>31</sup>P{<sup>1</sup>H} NMR (400 MHz, 298 K, C<sub>6</sub>D<sub>6</sub>) only *E* isomer visible; δ: 266.61 (d, *J*<sub>P-P</sub> = 220.8 Hz, (*p*-Me-Ph)(H)C=P-*Pt*Bu<sub>2</sub>, **E-4c**), 56.72 (d, *J*<sub>P-P</sub> = 220.8 Hz, (*p*-Me-Ph)(H)C=P-*Pt*Bu<sub>2</sub>, **E-4c**) ppm.

A.2.14. Reaction of **1** with 4-(dimethylamino)benzaldehyde

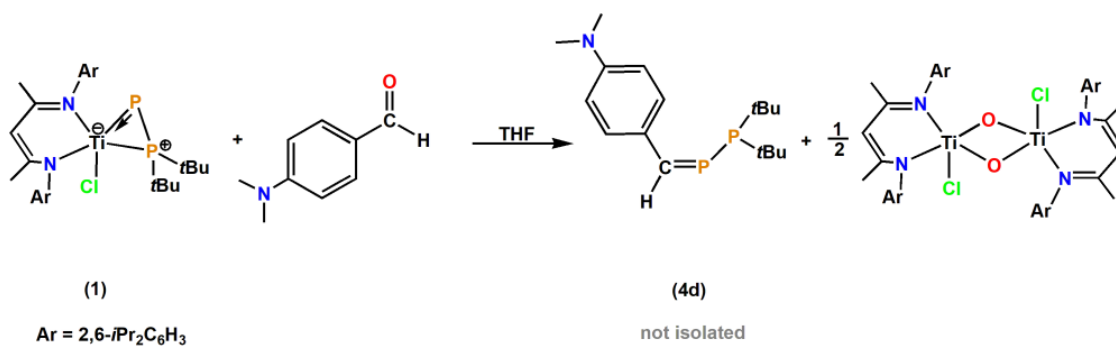

4-(dimethylamino)benzaldehyde (0.088 g, 0.591 mmol); orange-red reaction solution after 24 hours. An oily residue obtained after evaporation of the solvent was dissolved in C<sub>6</sub>D<sub>6</sub> and investigated by NMR spectroscopy.

<sup>31</sup>P{<sup>1</sup>H} NMR (400 MHz, C<sub>6</sub>D<sub>6</sub>, 298 K) only *E* isomer visible; δ: 230.63 (d, *J*<sub>P-P</sub> = 224.9 Hz, {(Me)<sub>2</sub>N-Ph}(H)C=P-*P*tBu<sub>2</sub>, *E*-**4d**), 57.72 (d, *J*<sub>P-P</sub> = 224.9 Hz, {4-(Me)<sub>2</sub>N-Ph}(H)C=P-*P*tBu<sub>2</sub>, *E*-**4d**), 19.56 (s, *t*Bu<sub>2</sub>PH) ppm.

<sup>31</sup>P{<sup>1</sup>H}, <sup>1</sup>H, <sup>13</sup>C{<sup>1</sup>H} NMR spectra of isolated {4-(Me)<sub>2</sub>N-Ph}(H)C=P-*P*tBu<sub>2</sub> (**4d**) see point A.3.14. page 33.

### A.2.15. Reaction of **1** with biphenyl-4-carboxaldehyde

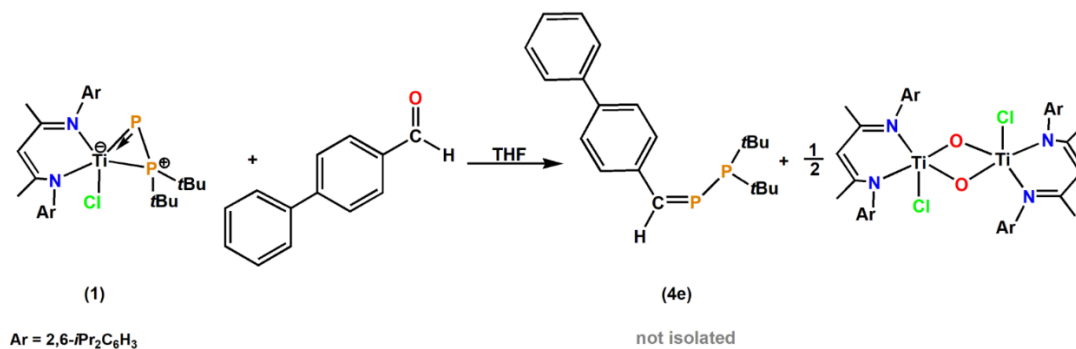

Biphenyl-4-carboxaldehyde (0.108 g, 0.591 mmol); dark orange reaction solution after 24 hours. An oily residue obtained after evaporation of the solvent was dissolved in  $\text{C}_6\text{D}_6$  and investigated by NMR spectroscopy.

$^{31}\text{P}\{^1\text{H}\}$  NMR (400 MHz,  $\text{C}_6\text{D}_6$ , 298 K) only *E* isomer visible;  $\delta$ : 274.76 (d,  $J_{\text{P-P}} = 224.9$  Hz,  $\text{PhPh}(\text{H})\text{C}=\text{P}-\text{P}t\text{Bu}_2$ , *E-4e*), 57.13 (d,  $J_{\text{P-P}} = 224.9$  Hz,  $\text{PhPh}(\text{H})\text{C}=\text{P}-\text{P}t\text{Bu}_2$ , *E-4e*), 19.57 (s,  $t\text{Bu}_2\text{PH}$ ) ppm.

$^{31}\text{P}\{^1\text{H}\}$ ,  $^1\text{H}$ ,  $^{13}\text{C}\{^1\text{H}\}$  NMR spectra of isolated  $\text{PhPh}(\text{H})\text{C}=\text{P}-\text{P}t\text{Bu}_2$  (**4e**) see point A.3.15. page 34.

### A.3. General method for the phospho-Peterson reaction of *t*Bu<sub>2</sub>P-P(SiMe<sub>3</sub>)Li·3THF (**2**) with selected ketones and aldehydes

Lithium salt of diphosphane *t*Bu<sub>2</sub>P-P(SiMe<sub>3</sub>)Li·3THF (**2**) (0.200 g; 0.424 mmol) was dissolved in 5 mL of toluene, and was added to following amount of the ketone or aldehyde solution in 5 mL of toluene. Each of the presented below reaction was conducted only 1 hour, and the solution was evaporated.

#### A.3.1. Reaction of **2** benzophenone

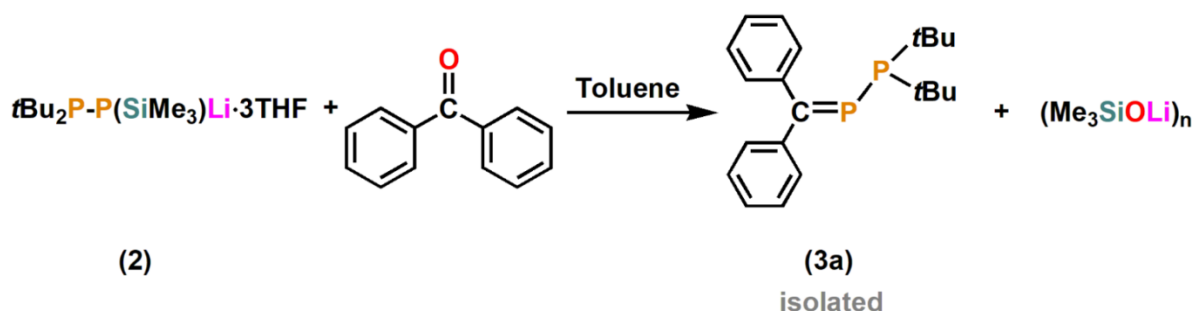

Benzophenone (0.077 g, 0.424 mmol). The solid residue was treated with petroleum ether (10 mL), the resulting solution was filtered, and concentrated by about half its volume. The solution was placed in -30°C, and after three hours dark orange crystals of (Ph)<sub>2</sub>C=P-P*t*Bu<sub>2</sub> (**3a**) appeared (0.109 g; yield: 75 %). M<sub>P</sub> at 85-86°C. Calculated elemental analysis (%) for C<sub>21</sub>H<sub>28</sub>P<sub>2</sub> (**3a**): C, 73.45; H, 8.51. Found: C, 73.41; H, 8.50.

<sup>1</sup>H NMR (400 MHz, C<sub>6</sub>D<sub>6</sub>, 298 K) δ: 7.70 – 7.00 (10H, (Ph)<sub>2</sub>C=P-P*t*Bu<sub>2</sub>), 1.20 (d, 18H, J<sub>P-H</sub> = 10.9 Hz, (Ph)<sub>2</sub>C=P-P*t*Bu<sub>2</sub>) ppm;

<sup>13</sup>C{<sup>1</sup>H} NMR (400 MHz, C<sub>6</sub>D<sub>6</sub>, 298 K) δ: 207.29 (dd, J<sub>P-C</sub> = 54.5 Hz, J<sub>P-C</sub> = 16.8 Hz, (Ph)<sub>2</sub>C=P-P*t*Bu<sub>2</sub>), 146.53 (dd, J<sub>P-C</sub> = 23.2 Hz, J<sub>P-C</sub> = 4.3 Hz, (Ph)<sub>2</sub>C=P-P*t*Bu<sub>2</sub>, *i*-C<sub>Ar</sub>), 145.61 (dd, J<sub>P-C</sub> = 13.9 Hz, J<sub>P-C</sub> = 5.9 Hz, (Ph)<sub>2</sub>C=P-P*t*Bu<sub>2</sub>, *i*-C<sub>Ar</sub>), 129.70 (dd, J<sub>P-C</sub> = 10.6 Hz, J<sub>P-C</sub> = 6.5 Hz, (Ph)<sub>2</sub>C=P-P*t*Bu<sub>2</sub>, *o*-C<sub>Ar</sub>), 129.29 (d, J<sub>P-C</sub> = 4.8 Hz, (Ph)<sub>2</sub>C=P-P*t*Bu<sub>2</sub>, *o*-C<sub>Ar</sub>), 128.04 (d, J<sub>P-C</sub> = 1.1 Hz, (Ph)<sub>2</sub>C=P-P*t*Bu<sub>2</sub>, *p*-C<sub>Ar</sub>), 127.32 (s, (Ph)<sub>2</sub>C=P-P*t*Bu<sub>2</sub>, *m*-C<sub>Ar</sub>), 127.20 (s, (Ph)<sub>2</sub>C=P-P*t*Bu<sub>2</sub>, *p*-C<sub>Ar</sub>), 127.13 (s, (Ph)<sub>2</sub>C=P-P*t*Bu<sub>2</sub>, *m*-Ar), 33.92 (dd, J<sub>P-C</sub> = 30.1 Hz, J<sub>PC</sub> = 4.3 Hz, (Ph)<sub>2</sub>C=P-P{C(Me<sub>3</sub>)<sub>2</sub>}), 31.08 (dd, J<sub>P-C</sub> = 14.4 Hz, J<sub>PC</sub> = 5.4 Hz, (Ph)<sub>2</sub>C=P-P{C(Me<sub>3</sub>)<sub>2</sub>}) ppm;

<sup>31</sup>P{<sup>1</sup>H} NMR (400 MHz, C<sub>6</sub>D<sub>6</sub>, 298 K) δ: 277.32 (d, J<sub>P-P</sub> = 228.9 Hz, (Ph)<sub>2</sub>C=P-P*t*Bu<sub>2</sub>), 27.39 (d, J<sub>P-P</sub> = 228.9 Hz, (Ph)<sub>2</sub>C=P-P*t*Bu<sub>2</sub>) ppm.

### A.3.2. Reaction of 2 with 9-fluorenone

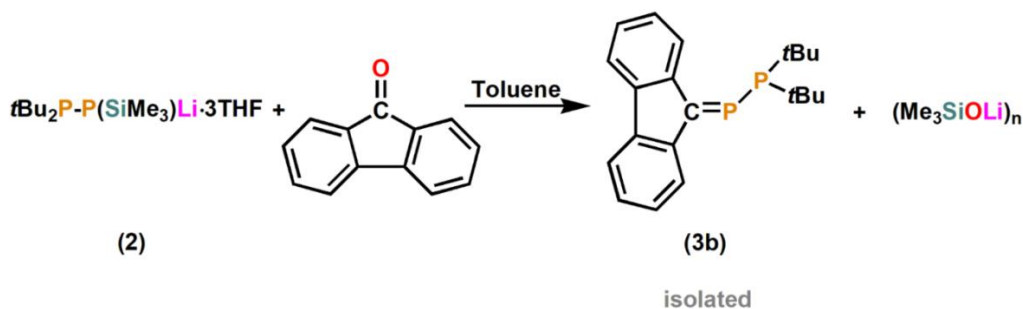

9-fluorenone (0.076 g, 0.424 mmol). The oily, red residue was treated with petroleum ether (10 mL), and the resulting solution was filtered. In the next step, from the obtained filtrate, the solvent was evaporated to dryness and red oil (0.128 g; yield 89 %) was NMR investigated. Calculated elemental analysis (%) for  $\text{C}_{21}\text{H}_{26}\text{P}_2$ : C, 74.10; H, 7.70. Found (conducted for oil): C, 73.90; H, 7.84.

$^1\text{H NMR}$  (400 MHz, Toluene- $d_8$ , 298 K)  $\delta$ : 9.43 – 6.76 ((**fluorenyl**)C=P-P*t*Bu<sub>2</sub>), 1.07 (d, 18H,  $J_{\text{PH}} = 11.9$  Hz, (fluorenyl)C=P-P*t*Bu<sub>2</sub>) ppm;

$^{13}\text{C}\{^1\text{H}\}$  NMR (400 MHz, Toluene- $d_8$ , 298 K)  $\delta$ : 189.46 (dd,  $J_{\text{P-C}} = 54.5$  Hz,  $J_{\text{P-C}} = 10.9$  Hz, (fluorenyl)C=P-P*t*Bu<sub>2</sub>), 143.81 (dd,  $J_{\text{P-C}} = 26.3$  Hz,  $J_{\text{P-C}} = 8.2$  Hz, (**fluorenyl**)C=P-P*t*Bu<sub>2</sub>), 141.36 (d,  $J_{\text{P-C}} = 9.1$  Hz, (fluorenyl)C=P-P*t*Bu<sub>2</sub>), 140.52 (dd,  $J_{\text{P-C}} = 18.6$  Hz,  $J_{\text{P-C}} = 1.3$  Hz, (fluorenyl)C=P-P*t*Bu<sub>2</sub>), 138.34 (d,  $J_{\text{P-C}} = 13.6$  Hz, (fluorenyl)C=P-P*t*Bu<sub>2</sub>), 129.72 (dd,  $J_{\text{P-C}} = 59.0$  Hz,  $J_{\text{P-C}} = 5.4$  Hz, (fluorenyl)C=P-P*t*Bu<sub>2</sub>), 129.65 (dd,  $J_{\text{P-C}} = 5.7$  Hz,  $J_{\text{P-C}} = 3.9$  Hz, (fluorenyl)C=P-P*t*Bu<sub>2</sub>), 121.38 (d,  $J_{\text{P-C}} = 25.4$  Hz, (fluorenyl)C=P-P*t*Bu<sub>2</sub>), 34.99 (dd,  $J_{\text{P-C}} = 27.9$  Hz,  $J_{\text{P-C}} = 3.1$  Hz, (fluorenyl)C=P-P{C(Me<sub>3</sub>)}<sub>2</sub>), 30.77 (dd,  $J_{\text{P-C}} = 14.1$  Hz,  $J_{\text{P-C}} = 5.3$  Hz, (fluorenyl)C=P-P{C(Me<sub>3</sub>)}<sub>2</sub>) ppm;

$^{31}\text{P}\{^1\text{H}\}$  NMR (400 MHz, Toluene- $d_8$ , 298 K)  $\delta$ : 297.17 (d,  $J_{\text{P-P}} = 228.4$  Hz, (fluorenyl)C=P-P*t*Bu<sub>2</sub>), 9.57 (d,  $J_{\text{P-P}} = 228.4$  Hz, (fluorenyl)C=P-P*t*Bu<sub>2</sub>) ppm.

### A.3.3. Reaction of **2** with 4-cyanobenzophenone

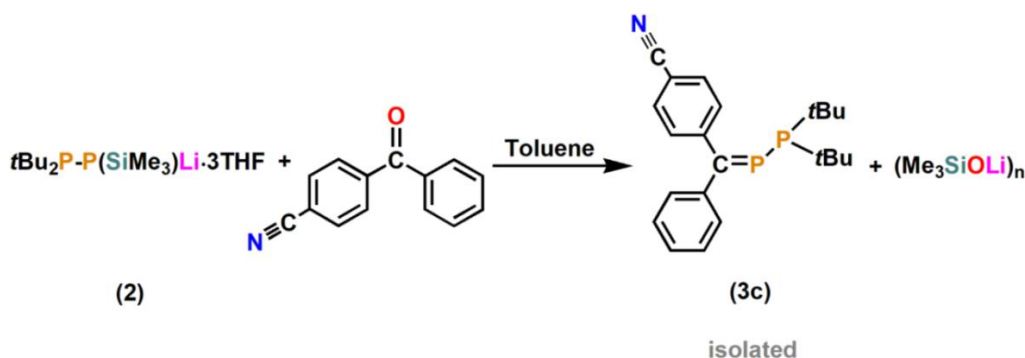

4-cyanobenzophenone 0.088 g, 0.424 mmol. The solid residue was treated with toluene (10 mL), and the resulting solution was filtered. During concentrating on the Schlenk appeared pale red crystals; therefore, the solution was left at room temperature for 24 hours. After this time a lot of crystals appeared, and were characterized as (Ph)(4-CN-Ph)C=P-PtBu<sub>2</sub> (**3c**) (0.100 g; yield: 65 %). M<sub>P</sub> at 92-93°C. Calculated elemental analysis (%) for C<sub>22</sub>H<sub>27</sub>NP<sub>2</sub> (**3c**): C, 71.72; H, 7.66; N, 3.80. Found: C, 71.68 ; H, 7.61; N, 3.82.

<sup>1</sup>H NMR (400 MHz, C<sub>6</sub>D<sub>6</sub>, 298 K) δ: 7.50 - 6.70 (10H, (Ph)(4-CN-Ph)C=P-PtBu<sub>2</sub>), 1.14 (d, 18H, J<sub>P-H</sub> = 10.9 Hz, (Ph)(4-CN-Ph)C=P-PtBu<sub>2</sub>, **E-3c**), 1.10 (d, 18H, J<sub>PH</sub> = 10.9 Hz, (Ph)(4-CN-Ph)C=P-PtBu<sub>2</sub>, **Z-3c**) ppm;

<sup>13</sup>C{<sup>1</sup>H} NMR (400 MHz, C<sub>6</sub>D<sub>6</sub>, 298 K) δ: 204.62 (dd, J<sub>P-C</sub> = 54.4 Hz, J<sub>P-C</sub> = 16.8 Hz, (Ph)(4-CN-Ph)C=P-PtBu<sub>2</sub>, **E-3c**), 204.40 (dd, J<sub>P-C</sub> = 55.5 Hz, J<sub>P-C</sub> = 17.1 Hz, (Ph)(4-CN-Ph)C=P-PtBu<sub>2</sub>, **Z-3c**), 149.57 (dd, J<sub>P-C</sub> = 24.1 Hz, J<sub>P-C</sub> = 3.7 Hz, (Ph)(4-CN-Ph)C=P-PtBu<sub>2</sub>, *i*-C<sub>Ar</sub>, **Z-3c**), 149.34 (dd, J<sub>P-C</sub> = 13.7 Hz, J<sub>P-C</sub> = 6.2 Hz, (Ph)(4-CN-Ph)C=P-PtBu<sub>2</sub>, *i*-C<sub>Ar</sub>, **E-3c**), 145.21 (dd, J<sub>P-C</sub> = 22.1 Hz, J<sub>P-C</sub> = 4.2 Hz, (Ph)(4-CN-Ph)C=P-PtBu<sub>2</sub>, *i*-C<sub>Ar</sub>, **E-3c**), 144.56 (dd, J<sub>P-C</sub> = 20.1 Hz, J<sub>P-C</sub> = 5.6 Hz, (Ph)(4-CN-Ph)C=P-PtBu<sub>2</sub>, *i*-C<sub>Ar</sub>, **Z-3c**), 131.58 (d, J<sub>P-C</sub> = 1.0 Hz, (Ph)(4-CN-Ph)C=P-PtBu<sub>2</sub>, *p*-Ar, **Z-3c**), 131.24 (s, (Ph)(4-CN-Ph)C=P-PtBu<sub>2</sub>, *o*-C<sub>Ar</sub>, **E-3c**), 130.00 (dd, J<sub>P-C</sub> = 6.6 Hz, J<sub>P-C</sub> = 4.1 Hz, (Ph)(4-CN-Ph)C=P-PtBu<sub>2</sub>, *o*-C<sub>Ar</sub>, **Z-3c**), 129.72 (d, J<sub>P-C</sub> = 4.8 Hz, (Ph)(4-CN-Ph)C=P-PtBu<sub>2</sub>, *o*-C<sub>Ar</sub>, **E-3c**), 129.44 (dd, J<sub>P-C</sub> = 6.5 Hz, J<sub>P-C</sub> = 4.2 Hz, (Ph)(4-CN-Ph)C=P-PtBu<sub>2</sub>, *o*-C<sub>Ar</sub>, **E-3c**), 128.24 (d, J<sub>P-C</sub> = 0.9 Hz, (Ph)(4-CN-Ph)C=P-PtBu<sub>2</sub>, *p*-C<sub>Ar</sub>, **E-3c**), 127.33 (s, (Ph)(4-CN-Ph)C=P-PtBu<sub>2</sub>, *m*-C<sub>Ar</sub>, **Z-3c**), 127.13 (s, (Ph)(4-CN-Ph)C=P-PtBu<sub>2</sub>, *m*-C<sub>Ar</sub>, **Z-3c**), 126.93 (s, (Ph)(4-CN-Ph)C=P-PtBu<sub>2</sub>, *m*-C<sub>Ar</sub>, **E-3c**), 126.73 (s, (Ph)(4-CN-Ph)C=P-PtBu<sub>2</sub>, *m*-C<sub>Ar</sub>, **E-3c**), 118.64 (s, (Ph)(4-CN-Ph)C=P-PtBu<sub>2</sub>, *m*-C<sub>Ar</sub>, **Z-3c**), 110.67 (s, (Ph)(4-CN-Ph)C=P-PtBu<sub>2</sub>, *m*-C<sub>Ar</sub>, **E-3c**), 34.15 (dd, J<sub>P-C</sub> = 30.2 Hz, J<sub>P-C</sub> = 4.1 Hz, (Ph)(4-CN-Ph)C=P-P{C(Me<sub>3</sub>)<sub>2</sub>}, **E-3c**), 34.04 (dd, J<sub>P-C</sub> = 29.5 Hz, J<sub>P-C</sub> = 4.1 Hz, (Ph)(4-CN-Ph)C=P-P{C(Me<sub>3</sub>)<sub>2</sub>}, **Z-3c**), 30.99 (dd, J<sub>P-C</sub> = 14.3 Hz, J<sub>P-C</sub> = 5.6 Hz, (Ph)(4-CN-Ph)C=P-P{C(Me<sub>3</sub>)<sub>2</sub>}, **E-3c**), 30.98 (dd, J<sub>P-C</sub> = 14.2 Hz, J<sub>P-C</sub> = 5.3 Hz, (Ph)(4-CN-Ph)C=P-P{C(Me<sub>3</sub>)<sub>2</sub>}, **Z-3c**) ppm;

<sup>31</sup>P{<sup>1</sup>H} NMR (400 MHz, C<sub>6</sub>D<sub>6</sub>, 298 K) δ: 303.89 (d, J<sub>P-P</sub> = 228.9 Hz, (Ph)(4-CN-Ph)C=P-PtBu<sub>2</sub>, **E-3c**), 286.27 (d, J<sub>P-P</sub> = 228.9 Hz, (Ph)(4-CN-Ph)C=P-PtBu<sub>2</sub>, **Z-3c**), 28.96 (d, J<sub>P-P</sub> = 228.9 Hz, (Ph)(4-CN-Ph)C=P-PtBu<sub>2</sub>, **E-3c**), 27.77 (d, J<sub>P-P</sub> = 228.9 Hz, (Ph)(4-CN-Ph)C=P-PtBu<sub>2</sub>, **Z-3c**) ppm.

### A.3.4. Reaction of **2** with 4,4'-dicyanobenzophenone

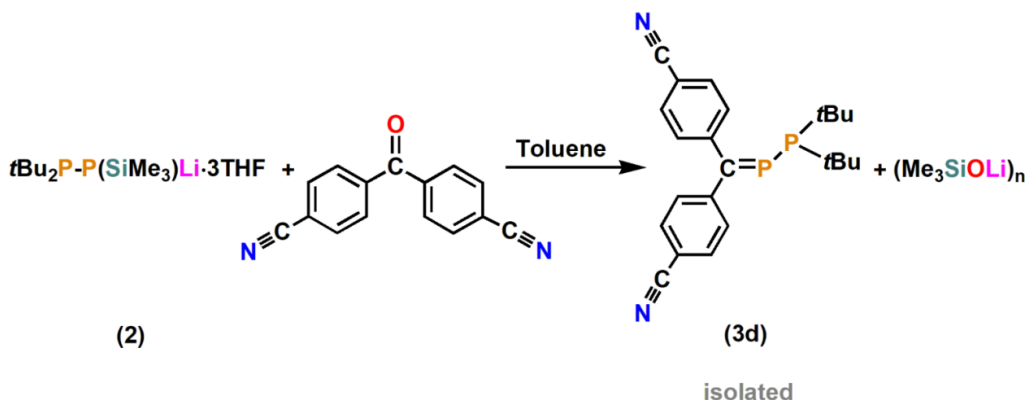

4,4'-dicyanobenzophenone (0.098 g, 0.424 mmol). The solid residue was treated with toluene (10 mL), and the resulting solution was filtered. The solution was concentrated to 2 mL, and 0.5 mL of pentane was added. The solution was stored at +4 °C for 24 hours. During this time dark red crystals appeared and were characterized as (4-CN-Ph)<sub>2</sub>C=P-PtBu<sub>2</sub> (**3d**) (0.118 g; yield: 71 %). M<sub>P</sub> at 158-159°C. Calculated elemental analysis (%) for C<sub>26.5</sub>H<sub>30</sub>N<sub>2</sub>P<sub>2</sub> (**3d**): C, 71.92; H, 7.41; N, 3.81. Found: C, 71.84; H, 7.36; N, 3.88.

<sup>1</sup>H NMR (400 MHz, C<sub>6</sub>D<sub>6</sub>, 298 K) δ: 7.13 (broad s, aromatic protons of toluene), 7.10 – 6.55 ppm (8H, (4-CN-Ph)<sub>2</sub>C=P-PtBu<sub>2</sub>), 1.05 (d, 18H, J<sub>P-H</sub> = 11.4 Hz, (4-CN-Ph)<sub>2</sub>C=P-PtBu<sub>2</sub>) ppm;

<sup>13</sup>C{<sup>1</sup>H} NMR (400 MHz, C<sub>6</sub>D<sub>6</sub>, 298 K) δ: 201.99 (dd, J<sub>P-C</sub> = 55.6 Hz, J<sub>P-C</sub> = 17.6 Hz, (4-CN-Ph)<sub>2</sub>C=P-PtBu<sub>2</sub>), 147.89 (dd, J<sub>P-C</sub> = 23.0 Hz, J<sub>P-C</sub> = 4.0 Hz, (4-CN-Ph)<sub>2</sub>C=P-PtBu<sub>2</sub>, *i*-C<sub>Ar</sub>), 137.53 (s, toluene, *i*-C<sub>Ar</sub>), 131.67 (d, J<sub>P-C</sub> = 1.0 Hz, (4-CN-Ph)<sub>2</sub>C=P-PtBu<sub>2</sub>, *m*-C<sub>Ar</sub>), 131.36 (s, (4-CN-Ph)<sub>2</sub>C=P-PtBu<sub>2</sub>, *m*-C<sub>Ar</sub>), 129.67 (dd, J<sub>P-C</sub> = 6.7 Hz, J<sub>P-C</sub> = 4.2 Hz, (4-CN-Ph)<sub>2</sub>C=P-PtBu<sub>2</sub>, *o*-C<sub>Ar</sub>), 129.47 (s, toluene, *o*-C<sub>Ar</sub>), 128.20 (toluene, *m*-C<sub>Ar</sub>), 126.75 (d, J<sub>P-C</sub> = 20.2 Hz, (4-CN-Ph)<sub>2</sub>C=P-PtBu<sub>2</sub>, *o*-C<sub>Ar</sub>), 125.33 (s, toluene, *p*-C<sub>Ar</sub>), 118.27 (s, (4-CN-Ph)<sub>2</sub>C=P-PtBu<sub>2</sub>), 111.64 (s, (4-CN-Ph)<sub>2</sub>C=P-PtBu<sub>2</sub>, *o*-C<sub>Ar</sub>), 34.26 (dd, J<sub>P-C</sub> = 29.4 Hz, J<sub>P-C</sub> = 3.9 Hz, (4-CN-Ph)<sub>2</sub>C=P-P{C(Me)<sub>3</sub>}<sub>2</sub>), 30.91 (dd, J<sub>P-C</sub> = 14.2 Hz, J<sub>P-C</sub> = 5.3 Hz, (4-CN-Ph)<sub>2</sub>C=P-P{C(Me)<sub>3</sub>}<sub>2</sub>), 21.06 (s, methyl group of toluene) ppm;

<sup>31</sup>P{<sup>1</sup>H} NMR (400 MHz, C<sub>6</sub>D<sub>6</sub>, 298 K) δ: 311.26 (d, J<sub>P-P</sub> = 232.5 Hz, (4-CN-Ph)<sub>2</sub>C=P-PtBu<sub>2</sub>), 29.40 (d, J<sub>P-P</sub> = 232.5 Hz, (4-CN-Ph)<sub>2</sub>C=P-PtBu<sub>2</sub>) ppm.

### A.3.5. Reaction of **2** with 4,4'-dimethoxybenzophenone

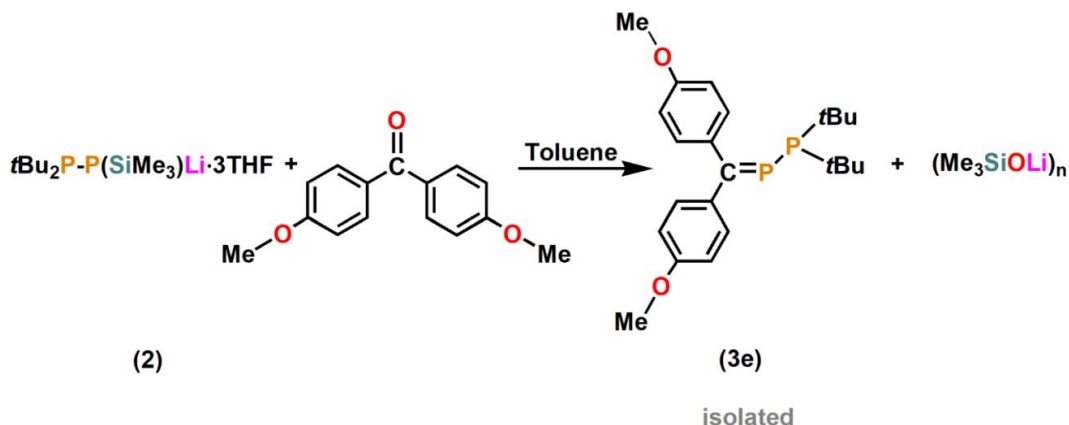

4,4'-dimethoxybenzophenone (0.143 g, 0.591 mmol). The slightly oily residue was treated with pentane (15 mL), and the resulting mixture was filtered. The solution was concentrated to 5 mL and stored at -23 °C for 24 hours. During this time orange crystals grown and were characterized as (4-MeO-Ph)<sub>2</sub>C=P-PtBu<sub>2</sub> (**3e**) (0.119 g; yield: 70 %). M<sub>P</sub> at 32-33°C. Calculated elemental analysis (%) for C<sub>26.5</sub>H<sub>30</sub>N<sub>2</sub>P<sub>2</sub> (**3e**): C, 71.92; H, 7.41; N, 3.81. Found: C, 71.84; H, 7.36; N, 3.88.

<sup>1</sup>H NMR (400 MHz, C<sub>6</sub>D<sub>6</sub>, 298 K) δ: 7.65 (dd, 2H, J<sub>P-H</sub> = 8.9 Hz, J<sub>P-H</sub> = 2.69 Hz, (4-MeO-Ph)<sub>2</sub>C=P-PtBu<sub>2</sub>, *o*-H<sub>Ar</sub>), 7.18 (dd, 2H, J<sub>P-H</sub> = 8.9 Hz, J<sub>P-H</sub> = 1.13 Hz, (4-MeO-Ph)<sub>2</sub>C=P-PtBu<sub>2</sub>, *o*-H<sub>Ar</sub>), 6.75 (d, 2H, J<sub>P-H</sub> = 8.7 Hz, (4-MeO-Ph)<sub>2</sub>C=P-PtBu<sub>2</sub>, *m*-H), 6.64 (d, 2H, J<sub>P-H</sub> = 9.3 Hz, (4-MeO-Ph)<sub>2</sub>C=P-PtBu<sub>2</sub>, *m*-H<sub>Ar</sub>), 3.23 (s, 3H, (4-MeO-Ph)<sub>2</sub>C=P-PtBu<sub>2</sub>), 3.20 (s, 3H, (4-MeO-Ph)<sub>2</sub>C=P-PtBu<sub>2</sub>), 1.24 (d, 18H, J<sub>P-H</sub> = 11.8 Hz, (4-MeO-Ph)<sub>2</sub>C=P-PtBu<sub>2</sub>) ppm;

<sup>13</sup>C{<sup>1</sup>H} NMR (400 MHz, C<sub>6</sub>D<sub>6</sub>, 298 K) δ: 206.36 (dd, J<sub>P-C</sub> = 55.0 Hz, J<sub>P-C</sub> = 16.1 Hz, (4-MeO-Ph)<sub>2</sub>C=P-PtBu<sub>2</sub>), 161.39 (d, J<sub>P-C</sub> = 4.4 Hz, (4-MeO-Ph)<sub>2</sub>C=P-PtBu<sub>2</sub>, *i*-C<sub>Ar</sub>), 159.31 (s, (4-MeO-Ph)<sub>2</sub>C=P-PtBu<sub>2</sub>, *i*-C<sub>Ar</sub>), 140.25 (dd, J<sub>P-C</sub> = 24.2 Hz, J<sub>P-C</sub> = 4.4 Hz, (4-MeO-Ph)<sub>2</sub>C=P-PtBu<sub>2</sub>, *i*-C<sub>Ar</sub>), 138.47 (dd, J<sub>P-C</sub> = 13.9 Hz, J<sub>P-C</sub> = 5.1 Hz, (4-MeO-Ph)<sub>2</sub>C=P-PtBu<sub>2</sub>, *i*-C<sub>Ar</sub>), 131.40 (dd, J<sub>P-C</sub> = 5.8 Hz, J<sub>P-C</sub> = 4.5 Hz, (4-MeO-Ph)<sub>2</sub>C=P-PtBu<sub>2</sub>, *o*-C<sub>Ar</sub>), 128.98 (d, J<sub>P-C</sub> = 19.8 Hz, (4-MeO-Ph)<sub>2</sub>C=P-PtBu<sub>2</sub>, *o*-C<sub>Ar</sub>), 113.44 (s, (4-MeO-Ph)<sub>2</sub>C=P-PtBu<sub>2</sub>, *m*-C<sub>Ar</sub>), 112.86 (s, (4-MeO-Ph)<sub>2</sub>C=P-PtBu<sub>2</sub>, *m*-C<sub>Ar</sub>), 54.49 (s, (4-MeO-Ph)<sub>2</sub>C=P-PtBu<sub>2</sub>), 54.32 (s, (4-MeO-Ph)<sub>2</sub>C=P-PtBu<sub>2</sub>), 33.96 (dd, J<sub>P-C</sub> = 30.1 Hz, J<sub>P-C</sub> = 4.4 Hz, (4-MeO-Ph)<sub>2</sub>C=P-P{C(CH<sub>3</sub>)<sub>2</sub>}), 31.13 (dd, J<sub>P-C</sub> = 14.7 Hz, J<sub>P-C</sub> = 5.1 Hz, (4-MeO-Ph)<sub>2</sub>C=P-P{C(CH<sub>3</sub>)<sub>2</sub>}) ppm;

<sup>31</sup>P{<sup>1</sup>H} NMR (400 MHz, C<sub>6</sub>D<sub>6</sub>, 298 K) δ: 258.28 (d, J<sub>P-P</sub> = 228.9 Hz, (4-MeO-Ph)<sub>2</sub>C=P-PtBu<sub>2</sub>), 28.28 (d, J<sub>P-P</sub> = 228.9 Hz, (4-MeO-Ph)<sub>2</sub>C=P-PtBu<sub>2</sub>) ppm.



### A.3.6. Reaction of **2** with *tert*-butyl phenyl ketone

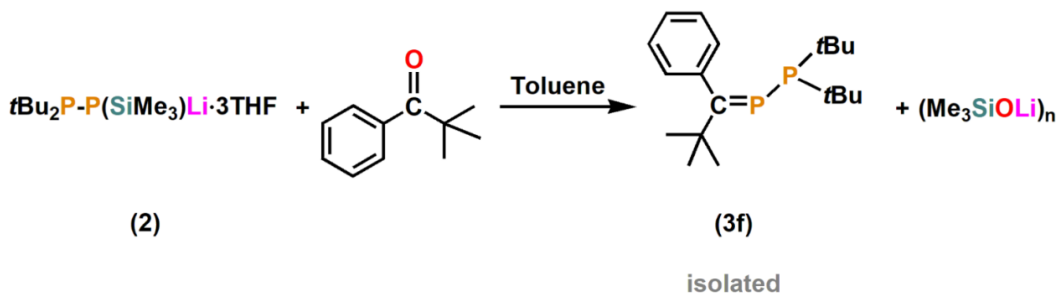

*tert*-butyl phenyl ketone (0.071 mL, 0.424 mmol, 0.970 g/mL). The yellow oily residue was treated with pentane (10 mL), and the resulting solution was filtered. From the resulting filtrate, the solvent was evaporated under reduced pressure to give an intensive yellow oil characterized as *t*Bu(Ph)C=P-*Pt*Bu<sub>2</sub> (**3f**). After 1 month the oil crystallized and the yellow crystals of **3f** were isolated (0.098 g; yield: 72 %). Calculated elemental analysis (%) for C<sub>19</sub>H<sub>32</sub>P<sub>2</sub> (**3f**): C, 70.78; H, 10.00; Found: C, 70.69; H, 10.22.

<sup>1</sup>H NMR (400 MHz, Toluene-d<sub>8</sub>, 298 K) δ: 7.57 – 6.81 (5H, *t*Bu(Ph)C=P-*Pt*Bu<sub>2</sub>), 1.29 (d, 9H, *J*<sub>P-H</sub> = 1.9 Hz, *t*Bu(Ph)C=P-*Pt*Bu<sub>2</sub>, **Z-3f**); 1.17 (d, 18H, *J*<sub>P-H</sub> = 10.7 Hz, *t*Bu(Ph)C=P-*Pt*Bu<sub>2</sub>, **Z-3f**) ppm;

<sup>13</sup>C{<sup>1</sup>H} NMR (400 MHz, Toluene-d<sub>8</sub>, 298 K) δ: 225.56 (dd, *J*<sub>P-C</sub> = 62.0 Hz, *J*<sub>P-C</sub> = 16.5 Hz, *t*Bu(Ph)C=P-*Pt*Bu<sub>2</sub>, **Z-3f**), 145.71 (dd, *J*<sub>P-C</sub> = 13.8 Hz, *J*<sub>P-C</sub> = 8.9 Hz, *t*Bu(Ph)C=P-*Pt*Bu<sub>2</sub> (*i*-C<sub>Ar</sub>), **Z-3f**), 129.42, (s, *t*Bu(Ph)C=P-*Pt*Bu<sub>2</sub> (*p*-C<sub>Ar</sub>), **Z-3f**), 128.08 (dd, *J*<sub>P-C</sub> = 8.2 Hz, *J*<sub>P-C</sub> = 2.7 Hz, *t*Bu(Ph)C=P-*Pt*Bu<sub>2</sub> (*o*-C<sub>Ar</sub>), **Z-3f**), 127.00 (s, *J*<sub>P-C</sub> = 3.6 Hz, *t*Bu(Ph)C=P-*Pt*Bu<sub>2</sub> (*m*-C<sub>Ar</sub>), **Z-3f**), 44.18 (dd, *J*<sub>P-C</sub> = 21.6 Hz, *J*<sub>PC</sub> = 3.2 Hz, {(CH<sub>3</sub>)<sub>3</sub>C}(Ph)C=P-P{(CH<sub>3</sub>)<sub>3</sub>C}, **Z-3f**), 32.93 (dd, *J*<sub>P-C</sub> = 30.2 Hz, *J*<sub>PC</sub> = 5.0 Hz, {(CH<sub>3</sub>)<sub>3</sub>C}(Ph)C=P-P{(CH<sub>3</sub>)<sub>3</sub>C}, **Z-3f**), 31.19 (dd, *J*<sub>P-C</sub> = 14.53 Hz, *J*<sub>P-C</sub> = 5.3 Hz, {(CH<sub>3</sub>)<sub>3</sub>C}(Ph)C=P-P{(CH<sub>3</sub>)<sub>3</sub>C}, **Z-3f**), 30.66 (d, *J*<sub>P-C</sub> = 15.0 Hz, {(CH<sub>3</sub>)<sub>3</sub>C}(Ph)C=P-P{(CH<sub>3</sub>)<sub>3</sub>C}, **Z-3f**) ppm;

<sup>31</sup>P{<sup>1</sup>H} NMR (400 MHz, Toluene-d<sub>8</sub>, 298 K) δ: 265.96 (d, *J*<sub>P-P</sub> = 216.9 Hz, *t*Bu(Ph)C=P-*Pt*Bu<sub>2</sub>, **Z-3f**), 261.05 (d, *J*<sub>P-P</sub> = 230.4 Hz, *t*Bu(Ph)C=P-*Pt*Bu<sub>2</sub>, **E-3f**), 21.31 (d), *J*<sub>P-P</sub> = 216.9 Hz, *t*Bu(Ph)C=P-*Pt*Bu<sub>2</sub>, **Z-3f**), 16.15 (d, *J*<sub>P-P</sub> = 230.4 Hz, *t*Bu(Ph)C=P-*Pt*Bu<sub>2</sub>, **E-3f**) ppm.

A.3.7. Reaction of **2** with acetone

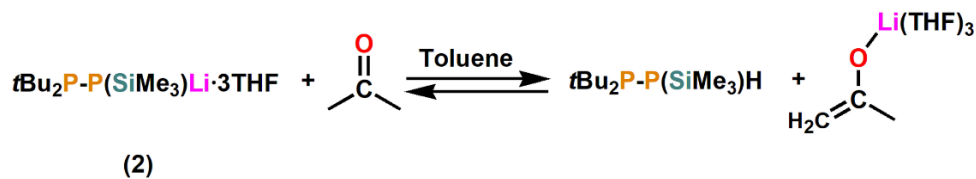

Acetone (0.031 mL, 0.424 mmol, 0.784 g/mL). The pale yellow oily residue was treated with C<sub>6</sub>D<sub>6</sub> and NMR investigated.

<sup>1</sup>H NMR (400 MHz, Toluene-d<sub>8</sub>, 298 K) δ: 3.86 and 3.82 (broad t, 2H, (Me)(CH<sub>2</sub>=)C-OLi(THF)<sub>3</sub>), 3.51 (quint., THF protons), 2.40 (d, 3 H, J<sub>P-H</sub> = 10.5 Hz, (Me)<sub>2</sub>C=P-PtBu<sub>2</sub>), 2.13 (d, 3 H, J<sub>P-H</sub> = 20.4 Hz, (Me)<sub>2</sub>C=P-PtBu<sub>2</sub>, **3g**), 1.94 (broad s, 3H, (Me)(CH<sub>2</sub>=)C-OLi(THF)<sub>3</sub>), 1.86 (s, 6H, Me<sub>2</sub>C=O), 1.43 (broad d, 18 H, J<sub>P-H</sub> = 10.4 Hz, tBu<sub>2</sub>P-P(SiMe<sub>3</sub>)Li), 1.39 (quint., THF protons), 1.38 (dd, 1H, J<sub>P-H</sub> = 187.2 Hz, J<sub>P-H</sub> = 2.5 Hz, tBu<sub>2</sub>P-P(SiMe<sub>3</sub>)H), 1.16 (d, 18 H, J<sub>P-H</sub> = 14.2 Hz, (Me)<sub>2</sub>C=P-PtBu<sub>2</sub>, **3g**), 1.09 (dd, 18 H, J<sub>P-H</sub> = 11.2 Hz, J<sub>P-H</sub> = 0.5 Hz, tBu<sub>2</sub>P-P(SiMe<sub>3</sub>)H), 0.46 (broad s, 9 H, tBu<sub>2</sub>P-P(SiMe<sub>3</sub>)Li), 0.20 (dd, 9 H, J<sub>P-H</sub> = 4.1 Hz, J<sub>P-H</sub> = 0.6 Hz, tBu<sub>2</sub>P-P(SiMe<sub>3</sub>)H) ppm.

<sup>13</sup>C{<sup>1</sup>H} NMR (400 MHz, Toluene-d<sub>8</sub>, 298 K) δ: 164.47 (s, (Me)(CH<sub>2</sub>=)C-OLi(THF)<sub>3</sub>), 137.06, 128.45, 127.55, 124.71 and 20.03 (Toluene-d<sub>8</sub>), 81.81 (s, (Me)(CH<sub>2</sub>=)C-OLi(THF)<sub>3</sub>), 67.59 (s, THF), 34.57 (s, Me<sub>2</sub>C=O), 32.23 (broad dd, J<sub>P-C</sub> = 29.8 Hz, J<sub>P-C</sub> = 9.9 Hz, {(CH<sub>3</sub>)<sub>3</sub>C}P-P(SiMe<sub>3</sub>)Li), 31.80 (dd, J<sub>P-C</sub> = 14.9 Hz, J<sub>P-C</sub> = 2.5 Hz, {(CH<sub>3</sub>)<sub>3</sub>C}P-P(SiMe<sub>3</sub>)Li), 30.82 (broad dd, J<sub>P-C</sub> = 22.4 Hz, J<sub>P-C</sub> = 9.9 Hz, {(CH<sub>3</sub>)<sub>3</sub>C}P-P(SiMe<sub>3</sub>)H), 30.19 (dd, J<sub>P-C</sub> = 14.9 Hz, J<sub>P-C</sub> = 7.5 Hz, {(CH<sub>3</sub>)<sub>3</sub>C}P-P(SiMe<sub>3</sub>)H), 26.06 (s, (Me)(CH<sub>2</sub>=)C-OLi(THF)<sub>3</sub>), 25.34 (s, THF), 5.66 (broad dd, J<sub>P-C</sub> = 9.9 Hz, J<sub>P-C</sub> = 7.5 Hz, tBu<sub>2</sub>P-P(SiMe<sub>3</sub>)Li), 1.03 (dd, J<sub>P-C</sub> = 9.9 Hz, J<sub>P-C</sub> = 4.9 Hz, tBu<sub>2</sub>P-P(SiMe<sub>3</sub>)H) ppm.

<sup>31</sup>P{<sup>1</sup>H} NMR (400 MHz, Toluene-d<sub>8</sub>, 298 K) δ: 235.53 (d, J<sub>P-P</sub> = 228.9 Hz, (Me)<sub>2</sub>C=P-PtBu<sub>2</sub>, **3g**), 46.57 (d, J<sub>P-P</sub> = 278.4 Hz, tBu<sub>2</sub>P-P(SiMe<sub>3</sub>)Li), 23.07 (d, J<sub>P-P</sub> = 228.9 Hz, (Me)<sub>2</sub>C=P-PtBu<sub>2</sub>, **3g**), and 19.02 (d, J<sub>P-P</sub> = 188.7 Hz, tBu<sub>2</sub>P-P(SiMe<sub>3</sub>)H), -197.35 (d, J<sub>P-P</sub> = 188.7 Hz, tBu<sub>2</sub>P-P(SiMe<sub>3</sub>)H), -245.14 (d, J<sub>P-P</sub> = 278.4 Hz, tBu<sub>2</sub>P-P(SiMe<sub>3</sub>)Li) ppm.

A.3.8. Reaction of **2** with cyclohexanone

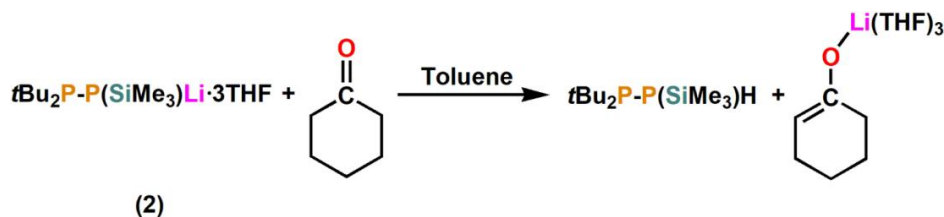

Cyclohexanone (0.044 mL, 0.424 mmol, 0.948 g/mL). The almost colorless oily residue was treated with C<sub>6</sub>D<sub>6</sub> and NMR investigated.

<sup>1</sup>H NMR (400 MHz, Toluene-d<sub>8</sub>, 298 K) δ: 4.49 (broad s, (*cyclo*-CH<sub>2</sub>CH<sub>2</sub>CH<sub>2</sub>CH<sub>2</sub>CH=C)OLi(THF)<sub>3</sub>), 3.63 (quintet, 12H, (*cyclo*-CH<sub>2</sub>CH<sub>2</sub>CH<sub>2</sub>CH<sub>2</sub>CH=C)OLi(THF)<sub>3</sub>), 1.85 (broad m, 2 H, (*cyclo*-CH<sub>2</sub>CH<sub>2</sub>CH<sub>2</sub>CH<sub>2</sub>CH=C)OLi(THF)<sub>3</sub>), 1.74 (broad m, 2H, (*cyclo*-CH<sub>2</sub>CH<sub>2</sub>CH<sub>2</sub>CH<sub>2</sub>CH=C)OLi(THF)<sub>3</sub>), 1.52, (quintet, 12H, (*cyclo*-CH<sub>2</sub>CH<sub>2</sub>CH<sub>2</sub>CH<sub>2</sub>CH=C)OLi(THF)<sub>3</sub>), 1.48 (dd, 1H, J<sub>P-H</sub> = 188.4 Hz, J<sub>P-H</sub> = 2.5 Hz, *t*Bu<sub>2</sub>P-P(SiMe<sub>3</sub>)H), 1.30 (broad m, 4H, (*cyclo*-CH<sub>2</sub>CH<sub>2</sub>CH<sub>2</sub>CH<sub>2</sub>CH=C)OLi(THF)<sub>3</sub>), 1.20 (d, 18H, J<sub>P-H</sub> = 11.4 Hz, *t*Bu<sub>2</sub>P-P(SiMe<sub>3</sub>)H), 0.31 (dd, 9H, J<sub>P-H</sub> = 4.2 Hz, J<sub>P-H</sub> = 0.6 Hz, *t*Bu<sub>2</sub>P-P(SiMe<sub>3</sub>)H) ppm;

<sup>13</sup>C{<sup>1</sup>H} NMR (400 MHz, Toluene-d<sub>8</sub>, 298 K) δ: 159.32 (s, (*cyclo*-CH<sub>2</sub>CH<sub>2</sub>CH<sub>2</sub>CH<sub>2</sub>CH=C)OLi(THF)<sub>3</sub>), 137.06, 128.45, 127.55 (toluene-d<sub>8</sub>), 89.53 (broad s, (*cyclo*-CH<sub>2</sub>CH<sub>2</sub>CH<sub>2</sub>CH<sub>2</sub>CH=C)OLi(THF)<sub>3</sub>), 33.56 (s, (*cyclo*-CH<sub>2</sub>CH<sub>2</sub>CH<sub>2</sub>CH<sub>2</sub>CH=C)OLi(THF)<sub>3</sub>), 31.21 (dd, J<sub>P-C</sub> = 32.3 Hz, J<sub>P-C</sub> = 13.7 Hz, {(CH<sub>3</sub>)<sub>3</sub>C}<sub>2</sub>P-P(SiMe<sub>3</sub>)H), 30.18 ppm, (dd, J<sub>P-C</sub> = 14.9 Hz, J<sub>P-C</sub> = 6.2 Hz, {(CH<sub>3</sub>)<sub>3</sub>C}<sub>2</sub>P-P(SiMe<sub>3</sub>)H), 25.59 (s, (*cyclo*-CH<sub>2</sub>CH<sub>2</sub>CH<sub>2</sub>CH<sub>2</sub>CH=C)OLi(THF)<sub>3</sub>), 24.95 (s, (*cyclo*-CH<sub>2</sub>CH<sub>2</sub>CH<sub>2</sub>CH<sub>2</sub>CH=C)OLi(THF)<sub>3</sub>), 24.41 (s, (*cyclo*-CH<sub>2</sub>CH<sub>2</sub>CH<sub>2</sub>CH<sub>2</sub>CH=C)OLi(THF)<sub>3</sub>), 20.03 (toluene-d<sub>8</sub>), 1.01 (dd, J<sub>P-C</sub> = 9.9 Hz, J<sub>P-C</sub> = 4.9 Hz, *t*Bu<sub>2</sub>P-P(SiMe<sub>3</sub>)H) ppm;

<sup>31</sup>P{<sup>1</sup>H} NMR (400 MHz, Toluene-d<sub>8</sub>, 298 K) δ: 19.06 (d, J<sub>P-P</sub> = 188.7 Hz, *t*Bu<sub>2</sub>P-P(SiMe<sub>3</sub>)H), -197.24 (d, J<sub>P-P</sub> = 188.7 Hz, *t*Bu<sub>2</sub>P-P(SiMe<sub>3</sub>)H) ppm.

A.3.9. Reaction of **2** with acetophenone

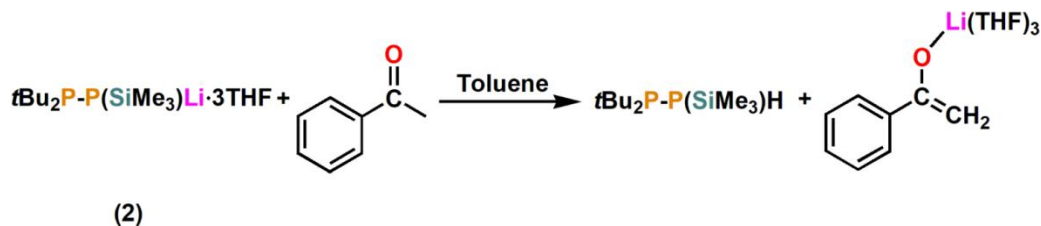

Acetophenone (0.050 mL, 0.424 mmol, 1.030 g/mL). The pale yellow oily residue was treated with C<sub>6</sub>D<sub>6</sub> and NMR investigated.

**<sup>1</sup>H NMR** (400 MHz, Toluene-d<sub>8</sub>, 298 K)  $\delta$ : 7.93 (dd, 2H,  $J_{\text{H-H}} = 9.2$  Hz,  $J_{\text{H-H}} = 1.1$  Hz, (Ph)(CH<sub>2</sub>=)C-OLi(THF)<sub>3</sub>, *m*-H<sub>Ar</sub>), 7.15 (t, 2H,  $J_{\text{H-H}} = 7.5$  Hz, (Ph)(CH<sub>2</sub>=)C-OLi(THF)<sub>3</sub>, *o*-H<sub>Ar</sub>), 7.00 (t, 1H,  $J_{\text{H-H}} = 7.5$  Hz, (Ph)(CH<sub>2</sub>=)C-OLi(THF)<sub>3</sub>, *p*-H<sub>Ar</sub>), 4.59, 4.29 (s, 2H, (Ph)(CH<sub>2</sub>=)C-OLi(THF)<sub>3</sub>), 3.44 (quintet, 12H, (Ph)(CH<sub>2</sub>=)C-OLi(THF)<sub>3</sub>), 1.38 (dd, 1H,  $J_{\text{P-H}} = 187.2$  Hz,  $J_{\text{P-H}} = 2.4$  Hz, *t*Bu<sub>2</sub>P-P(SiMe<sub>3</sub>)H), 1.28 (quintet, 12H, (Ph)(CH<sub>2</sub>=)C-OLi(THF)<sub>3</sub>), 1.09 (d, 18H,  $J_{\text{P-H}} = 11.2$  Hz, *t*Bu<sub>2</sub>P-P(SiMe<sub>3</sub>)H), 0.21 (d, 9H,  $J_{\text{P-H}} = 4.2$  Hz, *t*Bu<sub>2</sub>P-P(SiMe<sub>3</sub>)H) ppm;

**<sup>13</sup>C{<sup>1</sup>H} NMR** (400 MHz, Toluene-d<sub>8</sub>, 298 K)  $\delta$ : 165.92 (s, (Ph)(CH<sub>2</sub>=)C-OLi(THF)<sub>3</sub>, *i*-C<sub>Ar</sub>), 144.23 (s, (Ph)(CH<sub>2</sub>=)C-OLi(THF)<sub>3</sub>, *i*-C<sub>Ar</sub>), 137.06, 128.46, 127.56 (toluene-d<sub>8</sub>), 127.56, (s, (Ph)(CH<sub>2</sub>=)C-OLi(THF)<sub>3</sub>, *o*-C<sub>Ar</sub>), 126.29 (s, (Ph)(CH<sub>2</sub>=)C-OLi(THF)<sub>3</sub>, *p*-C<sub>Ar</sub>), 125.98 (s, (Ph)(CH<sub>2</sub>=)C-OLi(THF)<sub>3</sub>, *m*-C<sub>Ar</sub>), 124.72 (toluene-d<sub>8</sub>), 80.39 (s, (Ph)(CH<sub>2</sub>=)C-OLi(THF)<sub>3</sub>), 67.47 ((Ph)(CH<sub>2</sub>=)C-OLi(THF)<sub>3</sub>), 25.23 ((Ph)(CH<sub>2</sub>=)C-OLi(THF)<sub>3</sub>), 20.04 (toluene-d<sub>8</sub>), 4.67 (dd,  $J_{\text{P-C}} = 10.4$  Hz,  $J_{\text{P-C}} = 5.2$  Hz, {(CH<sub>3</sub>)C}<sub>2</sub>P-P(SiMe<sub>3</sub>)H) ppm;

**<sup>31</sup>P{<sup>1</sup>H} NMR** (400 MHz, 298 K, Toluene-d<sub>8</sub>)  $\delta$ : 263.61 (d,  $J_{\text{P-P}} = 234.9$  Hz, (Ph)MeC=P-*Pt*Bu<sub>2</sub>, ***E*-3i**), 21.89 (d,  $J_{\text{P-P}} = 234.9$  Hz, (Ph)MeC=P-*Pt*Bu<sub>2</sub>, ***E*-3i**), 19.07 (d,  $J_{\text{P-P}} = 188.7$  Hz, *t*Bu<sub>2</sub>P-P(SiMe<sub>3</sub>)H), -197.30 (d,  $J_{\text{P-P}} = 188.7$  Hz, *t*Bu<sub>2</sub>P-P(SiMe<sub>3</sub>)H) ppm.

A.3.10. Reaction of 2 with cyclopropyl methyl ketone

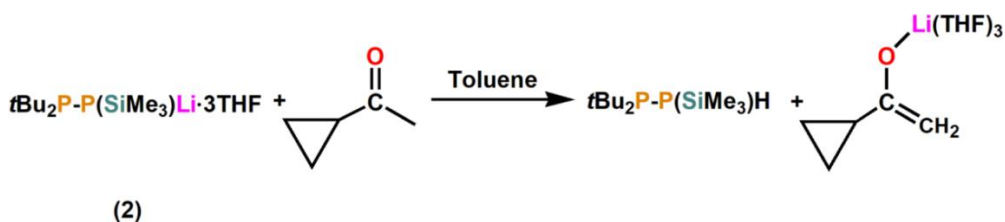

Cyclopropyl methyl ketone (0.042 mL, 0.424 mmol, 0.849 g/mL). The almost colorless, oily residue, was treated with C<sub>6</sub>D<sub>6</sub> and NMR investigated.

<sup>1</sup>H NMR (400 MHz, Toluene-d<sub>8</sub>, 298 K) δ: 3.79 (broad s, 2H, (*cyclo*-CH<sub>2</sub>CH<sub>2</sub>CH)(CH<sub>2</sub>=)C-OLi(THF)<sub>3</sub>), 3.76 (quintet, 12H, (*cyclo*-CH<sub>2</sub>CH<sub>2</sub>CH)(CH<sub>2</sub>=)C-OLi(THF)<sub>3</sub>), 2.13 (sept., 1H, (*cyclo*-CH<sub>2</sub>CH<sub>2</sub>CH)(CH<sub>2</sub>=)C-OLi(THF)<sub>3</sub>), 1.52 (quintet, 12H, (*cyclo*-CH<sub>2</sub>CH<sub>2</sub>CH)(CH<sub>2</sub>=)C-OLi(THF)<sub>3</sub>), 1.50 (dd, 1H, J<sub>P-H</sub> = 188.3 Hz, J<sub>P-H</sub> = 2.7 Hz, *t*Bu<sub>2</sub>P-P(SiMe<sub>3</sub>)H), 1.21 (d, 18H, 1H, J<sub>P-H</sub> = 11.4 Hz, *t*Bu<sub>2</sub>P-P(SiMe<sub>3</sub>)<sub>3</sub>), 0.79 (broad m, 2H, (*cyclo*-CH<sub>2</sub>CH<sub>2</sub>CH)(CH<sub>2</sub>=)C-OLi(THF)<sub>3</sub>), 0.55 (broad m, 2H, (*cyclo*-CH<sub>2</sub>CH<sub>2</sub>CH)(CH<sub>2</sub>=)C-OLi(THF)<sub>3</sub>) ppm;

<sup>13</sup>C{<sup>1</sup>H} NMR (400 MHz, Toluene-d<sub>8</sub>, 298 K) δ: 174.14 (s, (*cyclo*-CH<sub>2</sub>CH<sub>2</sub>CH)(CH<sub>2</sub>=)C-OLi(THF)<sub>3</sub>), 142.07, 133.46, 132.56, 129.72 (toluene-d<sub>8</sub>), 80.4 (s, (*cyclo*-CH<sub>2</sub>CH<sub>2</sub>CH)(CH<sub>2</sub>=)C-OLi(THF)<sub>3</sub>), 72.49 (s, (*cyclo*-CH<sub>2</sub>CH<sub>2</sub>CH)(CH<sub>2</sub>=)C-OLi(THF)<sub>3</sub>), 37.02 (broad d, J<sub>P-C</sub> = 34.5 Hz, {(CH<sub>3</sub>)C}<sub>2</sub>P-P(SiMe<sub>3</sub>)H), 35.18 (dd, J<sub>P-C</sub> = 30.2 Hz, J<sub>P-C</sub> = 5.4 Hz, {(CH<sub>3</sub>)C}<sub>2</sub>P-P(SiMe<sub>3</sub>)H), 30.40 (s, (*cyclo*-CH<sub>2</sub>CH<sub>2</sub>CH)(CH<sub>2</sub>=)C-OLi(THF)<sub>3</sub>), 25.03 (toluene-d<sub>8</sub>), 22.93 (s, (*cyclo*-CH<sub>2</sub>CH<sub>2</sub>CH)(CH<sub>2</sub>=)C-OLi(THF)<sub>3</sub>), 10.10 (s, (*cyclo*-CH<sub>2</sub>CH<sub>2</sub>CH)(CH<sub>2</sub>=)C-OLi(THF)<sub>3</sub>), 7.82 ppm, (dd, J<sub>P-C</sub> = 10.4 Hz, J<sub>P-C</sub> = 5.1 Hz, {(CH<sub>3</sub>)C}<sub>2</sub>P-P(SiMe<sub>3</sub>)H) ppm;

<sup>31</sup>P{<sup>1</sup>H} NMR (400 MHz, Toluene-d<sub>8</sub>, 298 K) δ: 19.01 (d, J<sub>P-P</sub> = 188.9 Hz, *t*Bu<sub>2</sub>P-P(SiMe<sub>3</sub>)H), -197.35 (d, J<sub>P-P</sub> = 188.9 Hz, *t*Bu<sub>2</sub>P-P(SiMe<sub>3</sub>)H) ppm.

### A.3.11. Reaction of **2** with isobutyraldehyde

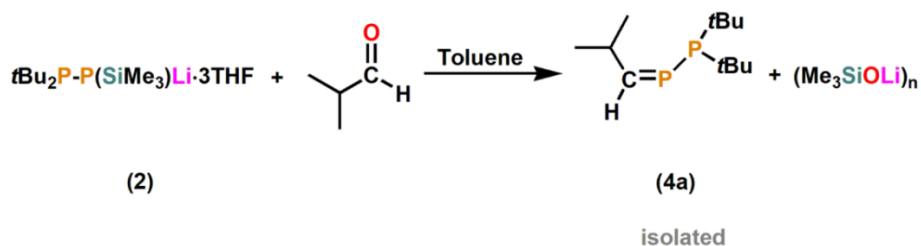

Isobutyraldehyde (0.039 mL, 0.424 mmol, 0.790 g/mL). The yellow oily residue was treated with pentane (10 mL), and the resulting solution was filtered. From the resulting filtrate, the solvent was evaporated under reduced pressure to give a yellow oil characterized as  $\{(\text{Me})_2\text{CH}\}(\text{H})\text{C}=\text{P-P}t\text{Bu}_2$  (**4a**) (0.075 g; 76 %).

$^{31}\text{P}\{^1\text{H}\}$  NMR (400 MHz, Toluene- $d_8$ , 298 K)  $\delta$ : 254.78 (d,  $J_{\text{P-P}} = 220.8$  Hz,  $\{(\text{Me})_2\text{CH}\}(\text{H})\text{C}=\text{P-P}t\text{Bu}_2$ , **E-4a**), 249.85 (d,  $J_{\text{P-P}} = 212.8$  Hz,  $\{(\text{Me})_2\text{CH}\}(\text{H})\text{C}=\text{P-P}t\text{Bu}_2$ , **Z-4a**), 52.83 (d,  $J_{\text{P-P}} = 220.8$  Hz,  $\{(\text{Me})_2\text{CH}\}(\text{H})\text{C}=\text{P-P}t\text{Bu}_2$ , **E-4a**), 19.47 (s,  $t\text{Bu}_2\text{PH}$ ), 18.98 (d,  $J_{\text{P-P}} = 188.7$  Hz,  $t\text{Bu}_2\text{P-P}(\text{SiMe}_3)\text{H}$ ), 12.65 (d,  $J_{\text{P-P}} = 212.8$  Hz,  $\{(\text{Me})_2\text{CH}\}(\text{H})\text{C}=\text{P-P}t\text{Bu}_2$ , **Z-4a**), -197.35 (d,  $J_{\text{P-P}} = 188.7$  Hz,  $t\text{Bu}_2\text{P-P}(\text{SiMe}_3)\text{H}$ ) ppm.

The  $^1\text{H}$  and  $^{13}\text{C}\{^1\text{H}\}$  NMR were analogical to these obtained in the reaction of **1** with isobutyraldehyde (see point A.2.11. page 15).

### A.3.12. Reaction of **2** with cyclohexanecarbaldehyde

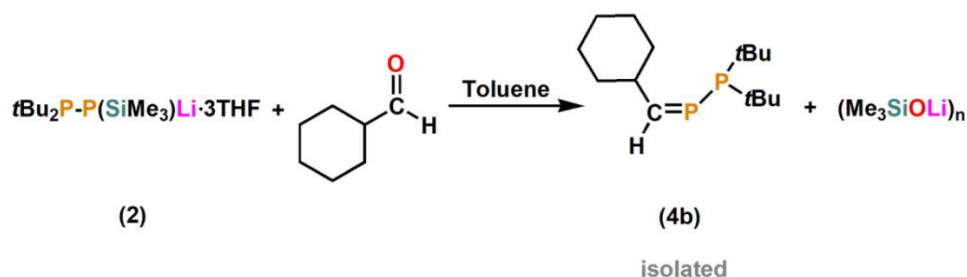

Cyclohexanecarbaldehyde (0.051 mL, 0.424 mmol, 0.926 g/mL). The yellow oily residue was treated with pentane (10 mL), and the resulting solution was filtered. From the resulting filtrate, the solvent was evaporated under reduced pressure to give a yellow oil characterized as  $\{\text{cyclo}-(\text{CH}_2)_4\text{CH}\}(\text{H})\text{C}=\text{P-P}t\text{Bu}_2$  (**4b**) (0.072 g; 62 %).

$^{31}\text{P}\{^1\text{H}\}$  NMR (400 MHz,  $\text{C}_6\text{D}_6$ , 298 K)  $\delta$ : 256.37 (d,  $J_{\text{P-P}} = 220.8$  Hz,  $\{\text{cyclo}-(\text{CH}_2)_4\text{CH}\}(\text{H})\text{C}=\text{P-P}t\text{Bu}_2$ , **E-4b**), 251.56 (d,  $J_{\text{P-P}} = 212.8$  Hz,  $\{\text{cyclo}-(\text{CH}_2)_4\text{CH}\}(\text{H})\text{C}=\text{P-P}t\text{Bu}_2$ , **Z-4b**), 53.16 (d,  $J_{\text{P-P}} = 220.8$  Hz,  $\{\text{cyclo}-(\text{CH}_2)_4\text{CH}\}(\text{H})\text{C}=\text{P-P}t\text{Bu}_2$ , **E-4b**), 13.03 (d,  $J_{\text{P-P}} = 212.8$  Hz,  $\{\text{cyclo}-(\text{CH}_2)_4\text{CH}\}(\text{H})\text{C}=\text{P-P}t\text{Bu}_2$ , **Z-4b**) ppm.

The  $^1\text{H}$  and  $^{13}\text{C}\{^1\text{H}\}$  NMR were analogical to these obtained in the reaction of **1** with cyclohexanecarbaldehyde (see point A.2.12. page 16).

A.3.13. Reaction of **2** with *p*-tolualdehyde

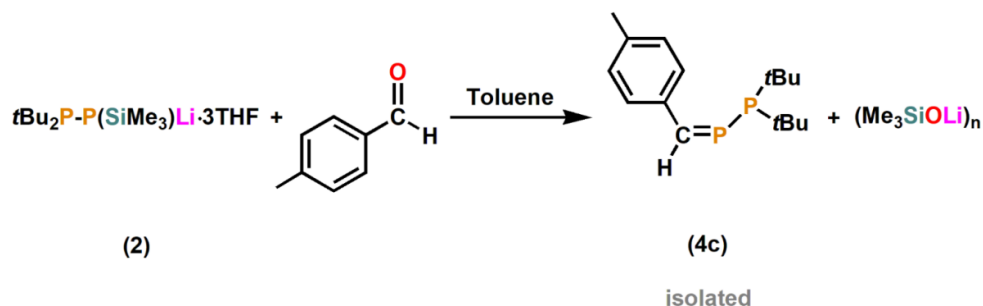

*p*-Tolualdehyde (0.050 mL, 0.424 mmol, 1.019 g/mL). The yellow oily residue was treated with pentane (10 mL), and the resulting solution was filtered. From the resulting filtrate, the solvent was evaporated under reduced pressure to give an intensive yellow oil characterized as (*p*-Me-Ph)(H)C=P-*Pt*Bu<sub>2</sub> (***E*-4c**) (0.089 g; 75 %).

<sup>31</sup>P{<sup>1</sup>H} NMR (400 MHz, C<sub>6</sub>D<sub>6</sub>, 298 K) δ: 266.64 (d *J*<sub>P-P</sub> = 220.8 Hz, (*p*-Me-Ph)(H)C=P-*Pt*Bu<sub>2</sub>, ***4c*<sub>E</sub>**), 56.69 (d, *J*<sub>P-P</sub> = 220.8 Hz, (*p*-Me-Ph)(H)C=P-*Pt*Bu<sub>2</sub>, ***4c*<sub>E</sub>**), 19.13 (d, *J*<sub>P-P</sub> = 188.9 Hz, *t*Bu<sub>2</sub>P-P(SiMe<sub>3</sub>)H, -197.20 (d, *J*<sub>P-P</sub> = 188.9 Hz, *t*Bu<sub>2</sub>P-P(SiMe<sub>3</sub>)H) ppm.

The <sup>1</sup>H and <sup>13</sup>C{<sup>1</sup>H} NMR were analogical to these obtained in the reaction of **1** with *p*-Tolualdehyde (see point A.2.13. page 17).



A.3.14. Reaction of **2** with 4-(dimethylamino)benzaldehyde

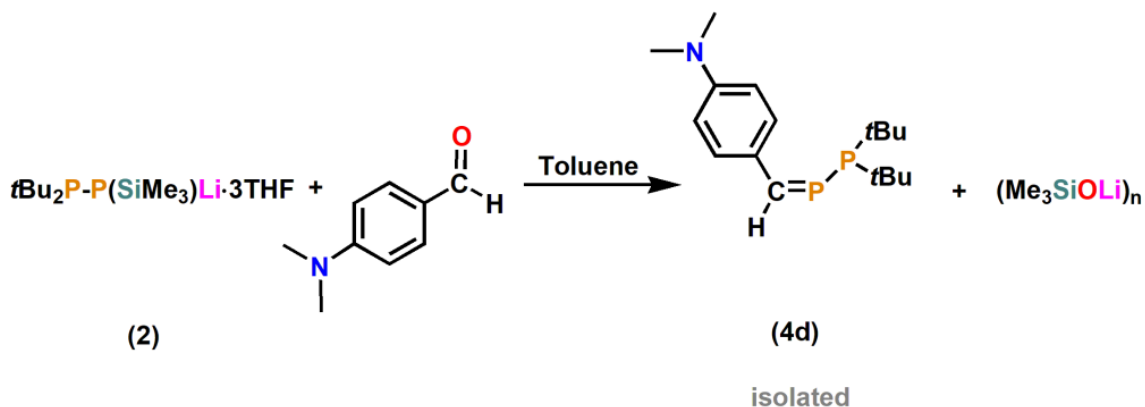

4-(dimethylamino)benzaldehyde (0.063 g, 0.424 mmol). The solid, intensive yellow residue was treated with pentane (15 mL), and the resulting solution was filtered. The solution was concentrated to 10 mL. The solution was stored at room temperature for 24 hours. During this time bright yellow crystals appeared and were characterized as {4-(Me)<sub>2</sub>N-Ph}(H)C=P-PtBu<sub>2</sub> (**E-4d**) (0.100 g; yield: 76 %). M<sub>P</sub> at 115-116°C. Calculated elemental analysis (%) for C<sub>17</sub>H<sub>29</sub>NP<sub>2</sub> (**E-4d**): C, 66.00; H, 8.45; N, 4.53. Found: C, 65.92; H, 9.38; N, 4.59.

<sup>1</sup>H NMR (400 MHz, C<sub>6</sub>D<sub>6</sub>, 298 K) δ: 10.14, (dd, 1H, J<sub>P-H</sub> = 21.8 Hz, J<sub>P-H</sub> = 14.4 Hz, {4-(Me)<sub>2</sub>N-Ph}(H)C=P-PtBu<sub>2</sub>, **E-4d**), 7.60, (dd, 2H, J<sub>P-H</sub> = 9.2 Hz, J<sub>P-H</sub> = 2.6 Hz, {4-(Me)<sub>2</sub>N-Ph}(H)C=P-PtBu<sub>2</sub>, *o*-H<sub>Ar</sub>, **E-4d**), 6.21, (d, 2H, J<sub>P-H</sub> = 8.9 Hz, {4-(Me)<sub>2</sub>N-Ph}(H)C=P-PtBu<sub>2</sub>, *m*-H<sub>Ar</sub>, **E-4d**), 2.22 (s, 6H, {4-(Me)<sub>2</sub>N-Ph}(H)C=P-PtBu<sub>2</sub>, **E-4d**), 1.25 (d, 18H, J<sub>P-H</sub> = 11.1 Hz, {4-(Me)<sub>2</sub>N-Ph}(H)C=P-PtBu<sub>2</sub>, **E-4d**) ppm;

<sup>13</sup>C{<sup>1</sup>H} NMR (400 MHz, C<sub>6</sub>D<sub>6</sub>, 298 K) δ: 197.40 (dd, J<sub>P-C</sub> = 46.3 Hz, J<sub>P-C</sub> = 39.9 Hz, {4-(Me)<sub>2</sub>N-Ph}(H)C=P-PtBu<sub>2</sub>, **E-4d**), 151.20 (d, J<sub>P-C</sub> = 5.5 Hz, {4-(Me)<sub>2</sub>N-Ph}(H)C=P-PtBu<sub>2</sub>, *p*-C<sub>Ar</sub>, **E-4d**), 131.49 (dd, J<sub>P-C</sub> = 16.3 Hz, J<sub>P-C</sub> = 11.8 Hz, {4-(Me)<sub>2</sub>N-Ph}(H)C=P-PtBu<sub>2</sub>, *i*-C<sub>Ar</sub>, **E-4d**), 128.56 (d, J<sub>P-C</sub> = 19.9 Hz, {4-(Me)<sub>2</sub>N-Ph}(H)C=P-PtBu<sub>2</sub>, *o*-C<sub>Ar</sub>, **E-4d**), 111.60 (d, J<sub>P-C</sub> = 19.9 Hz, {4-(Me)<sub>2</sub>N-Ph}(H)C=P-PtBu<sub>2</sub>, *m*-C<sub>Ar</sub>, **E-4d**), 39.22 (s, {4-(Me)<sub>2</sub>N-Ph}(H)C=P-PtBu<sub>2</sub>, **E-4d**), 33.04 (dd, J<sub>P-C</sub> = 22.7 Hz, J<sub>P-C</sub> = 1.8 Hz, {4-(Me)<sub>2</sub>N-Ph}(H)C=P-P{C(Me)<sub>3</sub>}<sub>2</sub>, **E-4d**), 31.32 (dd, J<sub>P-C</sub> = 13.6 Hz, J<sub>P-C</sub> = 5.5 Hz, {4-(Me)<sub>2</sub>N-Ph}(H)C=P-P{C(Me)<sub>3</sub>}<sub>2</sub>, **E-4d**) ppm;

<sup>31</sup>P{<sup>1</sup>H} NMR (400 MHz, C<sub>6</sub>D<sub>6</sub>, 298 K) δ: 231.17 (d, J<sub>P-P</sub> = 224.9 Hz, {4-(Me)<sub>2</sub>N-Ph}(H)C=P-PtBu<sub>2</sub>, **E-4d**), 57.73 (d, J<sub>P-P</sub> = 224.9 Hz, {4-(Me)<sub>2</sub>N-Ph}(H)C=P-PtBu<sub>2</sub>, **E-4d**) ppm.

A.3.15. Reaction of **2** with biphenyl-4-carboxaldehyde

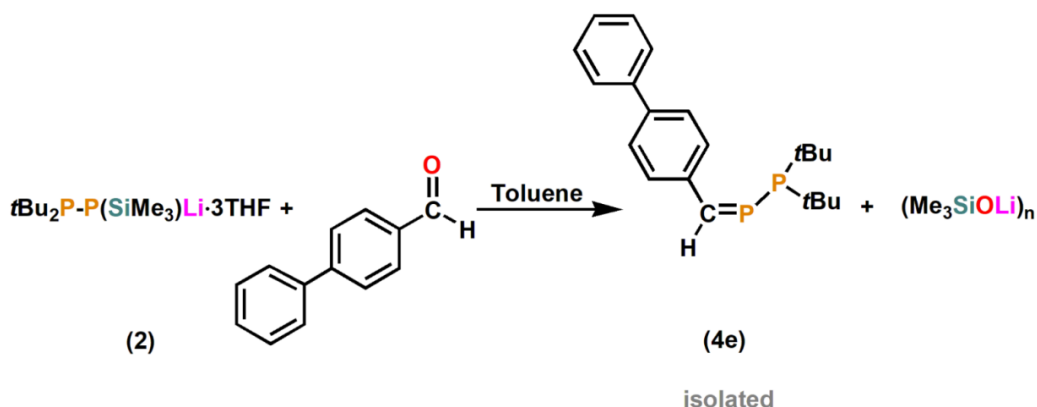

Biphenyl-4-carboxaldehyde (0.077 g, 0.424 mmol). The solid, residue was treated with pentane (15 mL), and the resulting solution was filtered. The solution was concentrated to 8 mL. The solution was stored at +4°C for 24 hours. During this time orange crystals appeared and were characterized as PhPh(H)C=P-PtBu<sub>2</sub> (**E-4e**) (0.122 g; yield: 84 %). M<sub>p</sub> at 134-135°C. Calculated elemental analysis (%) for C<sub>21</sub>H<sub>28</sub>P<sub>2</sub> (**4e**): C, 73.66; H, 8.24. Found: C, 73.61; H, 8.18.

<sup>1</sup>H NMR (400 MHz, C<sub>6</sub>D<sub>6</sub>, 298 K) δ: 10.16 (dd, 1H, *J*<sub>PH</sub> = 22.5 Hz, *J*<sub>P-H</sub> = 13.4 Hz, PhPh(**H**)C=P-PtBu<sub>2</sub>), 7.67 – 7.04 (9H, aromatic protons, PhPh(**H**)C=P-PtBu<sub>2</sub>, **E-4e**), 1.28 (d, 18 H, *J*<sub>P-H</sub> = 11.1 Hz, PhPh(**H**)C=P-PtBu<sub>2</sub>, **E-4e**) ppm;

<sup>13</sup>C{<sup>1</sup>H} NMR (400 MHz, C<sub>6</sub>D<sub>6</sub>, 298 K) δ: 196.94 (dd, *J*<sub>P-C</sub> = 44.9 Hz, *J*<sub>P-C</sub> = 39.5 Hz, PhPh(**H**)C=P-PtBu<sub>2</sub>, **E-4e**), 142.24 (d, *J*<sub>P-C</sub> = 7.18 Hz, PhPh(**H**)C=P-PtBu<sub>2</sub>, *i*-C<sub>Ar</sub>, **E-4e**), 140.47 (d, *J*<sub>P-C</sub> = 1.5 Hz, PhPh(**H**)C=P-PtBu<sub>2</sub>, *i*-C<sub>Ar</sub>, **E-4e**), 140.46 (dd, *J*<sub>P-C</sub> = 15.8 Hz, *J*<sub>P-C</sub> = 12.4 Hz, PhPh(**H**)C=P-PtBu<sub>2</sub>, *i*-C<sub>Ar</sub>, **E-4e**), 128.72 (s, PhPh(**H**)C=P-PtBu<sub>2</sub>, **E-4e**), 127.34 (s, PhPh(**H**)C=P-PtBu<sub>2</sub>, *o*-C<sub>Ar</sub>, **E-4e**), 127.28 (d, *J*<sub>P-C</sub> = 2.6 Hz, PhPh(**H**)C=P-PtBu<sub>2</sub>, *o*-C<sub>Ar</sub>, **E-4e**), 126.90 (s, PhPh(**H**)C=P-PtBu<sub>2</sub>, *m*-C<sub>Ar</sub>, **E-4e**), 33.21 (dd, *J*<sub>P-C</sub> = 27.7 Hz, *J*<sub>P-C</sub> = 2.27 Hz, PhPh(**H**)C=P-P{C(CH<sub>3</sub>)<sub>3</sub>}<sub>2</sub>, **E-4e**), 31.18 (dd, *J*<sub>P-C</sub> = 13.8 Hz, *J*<sub>P-C</sub> = 5.0 Hz, PhPh(**H**)C=P-P{C(CH<sub>3</sub>)<sub>3</sub>}<sub>2</sub>, **E-4e**) ppm;

<sup>31</sup>P{<sup>1</sup>H} NMR (400 MHz, C<sub>6</sub>D<sub>6</sub>, 298 K) δ: 274.72 (d, *J*<sub>P-P</sub> = 224.9 Hz, PhPh(**H**)C=P-PtBu<sub>2</sub>, **E-4e**), 57.13 (d, *J*<sub>P-P</sub> = 224.9 Hz, PhPh(**H**)C=P-PtBu<sub>2</sub>, **E-4e**) ppm.

## PART B. NMR Spectra

### B.1. Reaction of [(BDI\*)Ti(Cl){ $\eta^2$ -P-PtBu<sub>2</sub>}] (1) with selected ketones and aldehydes

#### B.1.1. Benzophenone

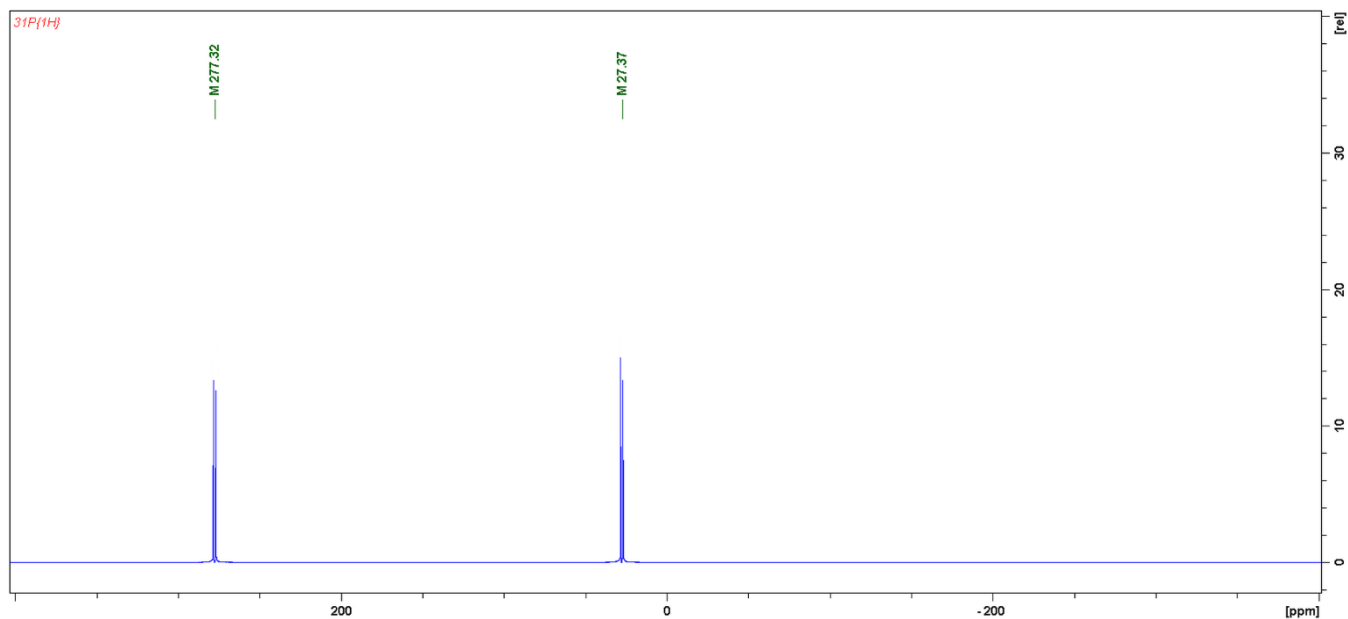

**Figure S1.** <sup>31</sup>P{<sup>1</sup>H} NMR (400 MHz, C<sub>6</sub>D<sub>6</sub>, 298 K) spectrum of reaction mixture conducted 3 months after starting the reaction of [(BDI\*)Ti(Cl){ $\eta^2$ -P-PtBu<sub>2</sub>}] (1) with benzophenone.

- 277.32 ppm, (d),  $J_{P-P} = 228.9$  Hz, (Ph)<sub>2</sub>C=P-PtBu<sub>2</sub>;
- 27.39 ppm, (d),  $J_{P-P} = 228.9$  Hz, (Ph)<sub>2</sub>C=P-PtBu<sub>2</sub>;

### B.1.2. 9-fluorenone

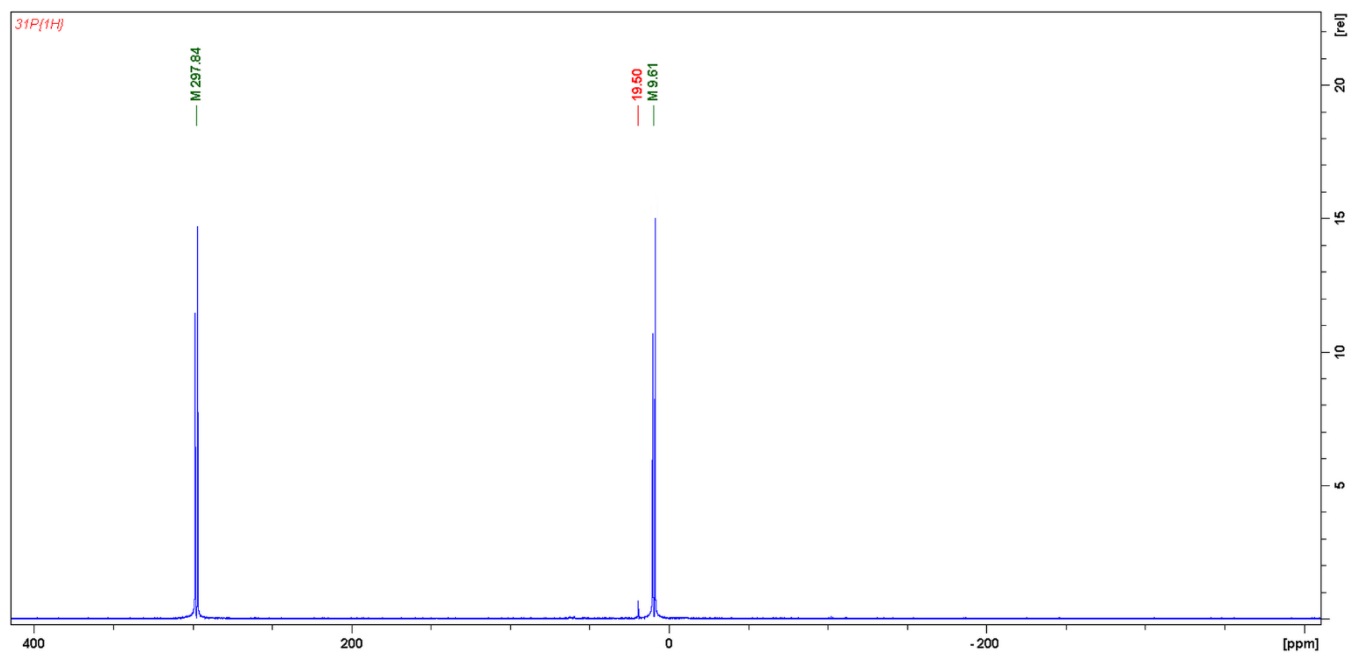

**Figure S2.**  $^{31}\text{P}\{^1\text{H}\}$  NMR (400 MHz,  $\text{C}_6\text{D}_6$ , 298 K) spectrum of reaction mixture conducted 24 hours after starting the reaction of 1 with 9-fluorenone.

- 297.84 ppm, (d),  $J_{\text{P-P}} = 228.4$  Hz, (fluorenyl)C=P-P*t*Bu<sub>2</sub>;
- 19.50 ppm, (s), *t*Bu<sub>2</sub>PH;
- 9.61 ppm, (d),  $J_{\text{P-P}} = 228.4$  Hz, (fluorenyl)C=P-P*t*Bu<sub>2</sub>;

### B.1.3. 4-cyanobenzophenone

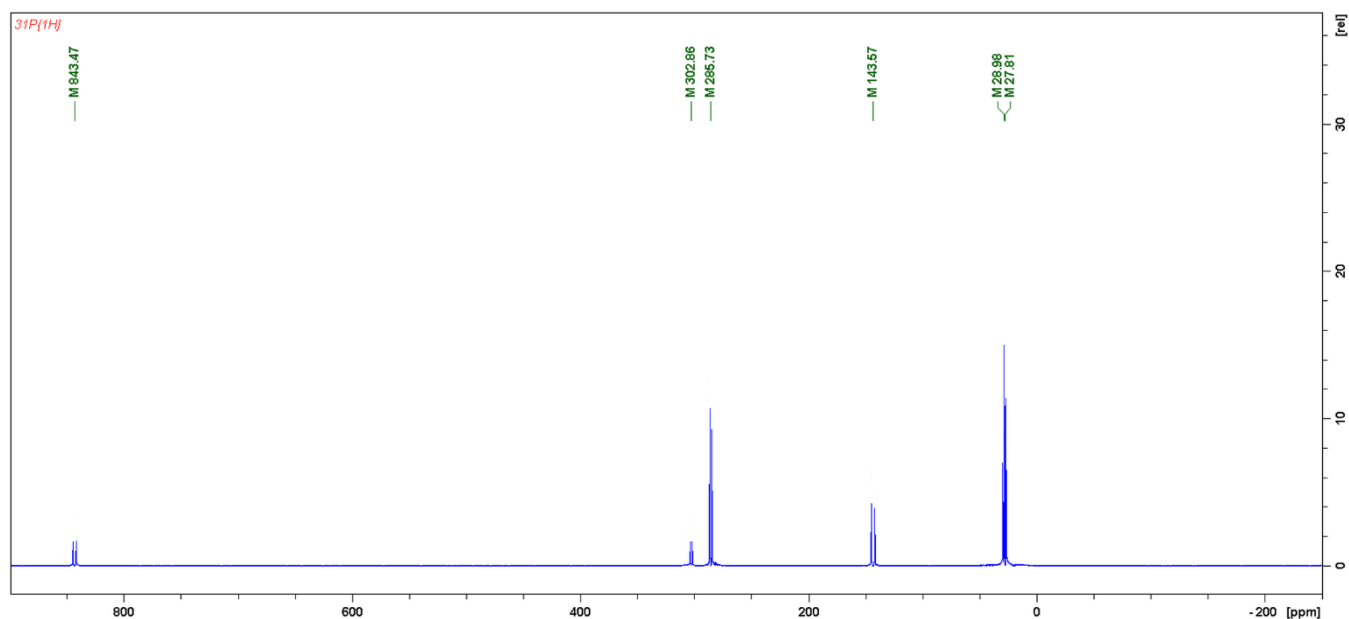

**Figure S3.**  $^{31}\text{P}\{^1\text{H}\}$  NMR (400 MHz,  $\text{C}_6\text{D}_6$ , 298 K) spectrum of reaction mixture conducted 3 months after starting the reaction of **1** with 4-cyanobenzophenone.

- 843.47 ppm, (d),  $J_{\text{P-P}} = 450.5$  Hz,  $[(\text{BDI}^*)\text{Ti}(\text{Cl})\{\eta^2\text{-P-P}t\text{Bu}_2\}]$ ;
- 302.86 ppm, (d),  $J_{\text{P-P}} = 228.9$  Hz,  $(\text{Ph})(4\text{-CN-Ph})\text{C}=\text{P-P}t\text{Bu}_2$  – *E* isomer;
- 285.73 ppm, (d),  $J_{\text{P-P}} = 228.9$  Hz,  $(\text{Ph})(4\text{-CN-Ph})\text{C}=\text{P-P}t\text{Bu}_2$  – *Z* isomer;
- 143.57 ppm, (d),  $J_{\text{P-P}} = 450.5$  Hz,  $[(\text{BDI}^*)\text{Ti}(\text{Cl})\{\eta^2\text{-P-P}t\text{Bu}_2\}]$ ;
- 28.98 ppm, (d),  $J_{\text{P-P}} = 228.9$  Hz,  $(\text{Ph})(4\text{-CN-Ph})\text{C}=\text{P-P}t\text{Bu}_2$  – *E* isomer;
- 27.81 ppm, (d),  $J_{\text{P-P}} = 228.9$  Hz,  $(\text{Ph})(4\text{-CN-Ph})\text{C}=\text{P-P}t\text{Bu}_2$  – *Z* isomer;

### B.1.4. 4,4'-dicyanobenzophenone

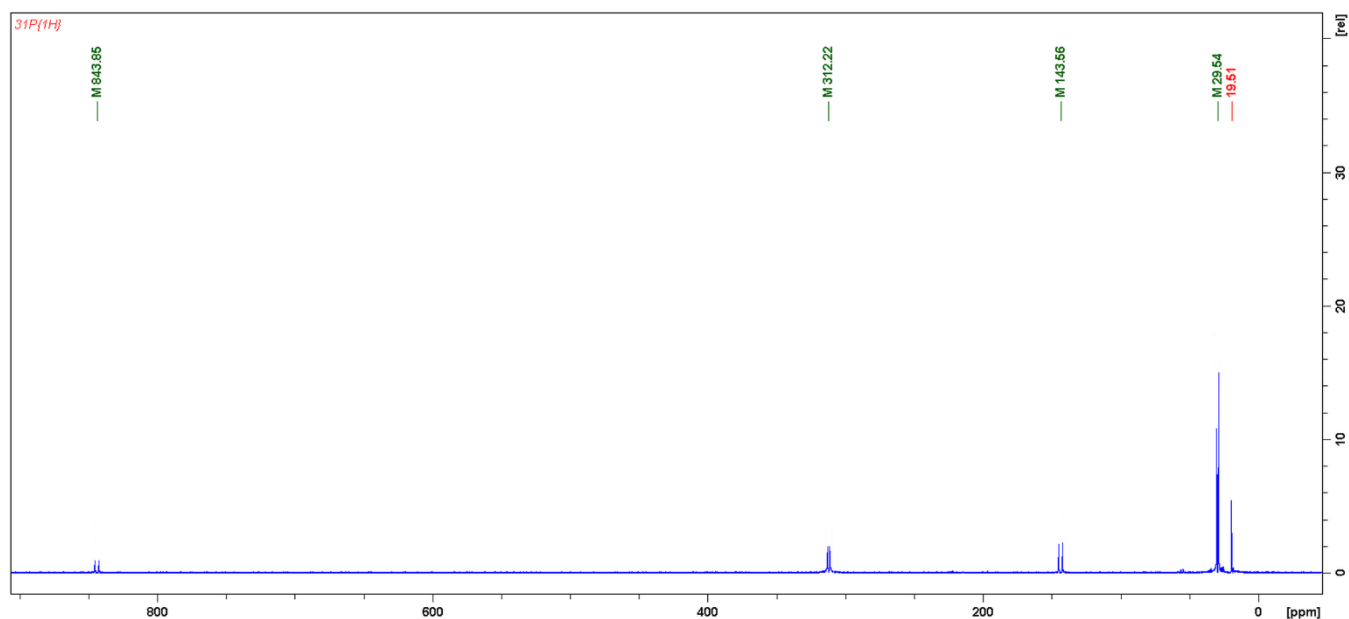

**Figure S4.**  $^{31}\text{P}\{^1\text{H}\}$  NMR (400 MHz,  $\text{C}_6\text{D}_6$ , 298 K) spectrum of reaction mixture conducted 3 months after starting the reaction of **1** with 4,4'-dicyanobenzophenone.

- 843.85 ppm, (d),  $J_{\text{P-P}} = 450.5$  Hz,  $[(\text{BDI}^*)\text{Ti}(\text{Cl})\{\eta^2\text{-P-P}t\text{Bu}_2\}]$ ;
- 312.22 ppm, (d),  $J_{\text{P-P}} = 232.5$  Hz,  $(4\text{-CN-Ph})_2\text{C}=\text{P-P}t\text{Bu}_2$ ;
- 143.56 ppm, (d),  $J_{\text{P-P}} = 450.5$  Hz,  $[(\text{BDI}^*)\text{Ti}(\text{Cl})\{\eta^2\text{-P-P}t\text{Bu}_2\}]$ ;
- 29.54 ppm, (d),  $J_{\text{P-P}} = 232.5$  Hz,  $(4\text{-CN-Ph})_2\text{C}=\text{P-P}t\text{Bu}_2$ ;
- 19.51 ppm, (s),  $t\text{Bu}_2\text{PH}$ ;

### B.1.5. 4,4'-dimethoxybenzophenone

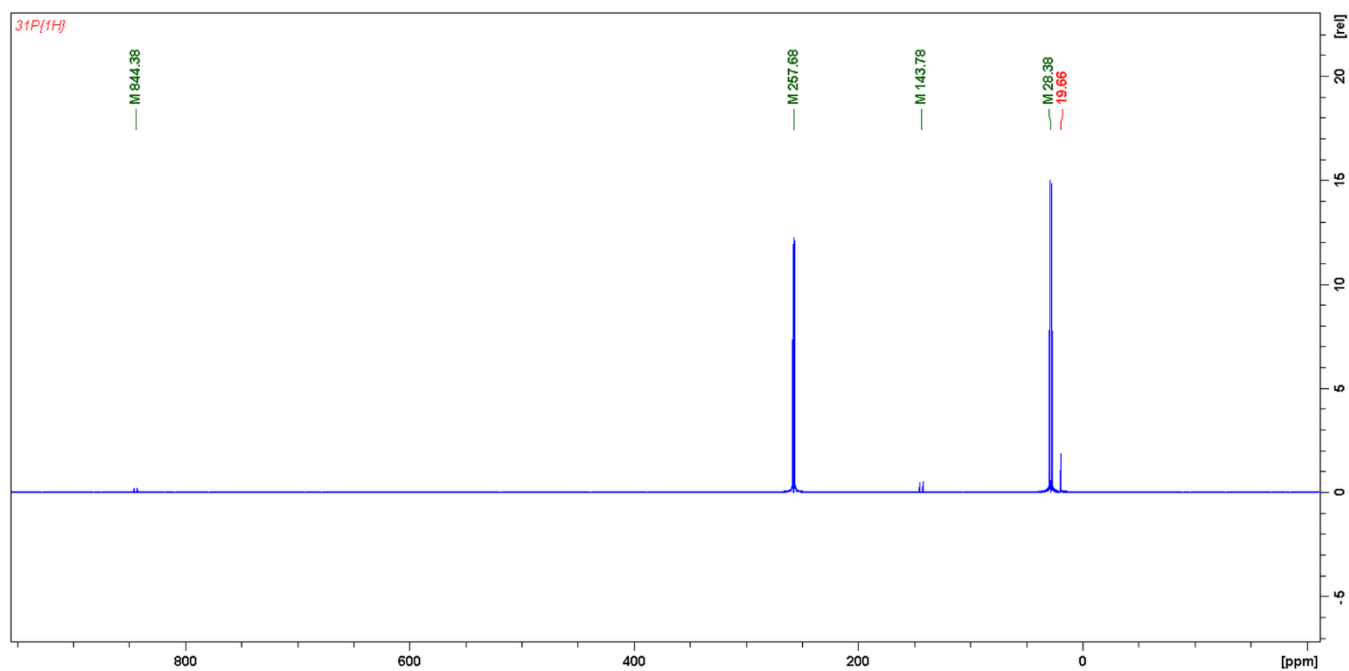

**Figure S5.**  $^{31}\text{P}\{^1\text{H}\}$  NMR (400 MHz,  $\text{C}_6\text{D}_6$ , 298 K) spectrum of reaction mixture conducted 3 months after starting the reaction of **1** with 4,4'-dimethoxybenzophenone.

- 844.38 ppm, (d),  $J_{\text{P-P}} = 450.5$  Hz,  $[(\text{BDI}^*)\text{Ti}(\text{Cl})\{\eta^2\text{-P-P}t\text{Bu}_2\}]$ ;
- 257.68 ppm, (d),  $J_{\text{P-P}} = 228.9$  Hz,  $(4\text{-MeO-Ph})_2\text{C}=\text{P-P}t\text{Bu}_2$ ;
- 143.78 ppm, (d),  $J_{\text{P-P}} = 450.5$  Hz,  $[(\text{BDI}^*)\text{Ti}(\text{Cl})\{\eta^2\text{-P-P}t\text{Bu}_2\}]$ ;
- 28.38 ppm, (d),  $J_{\text{P-P}} = 228.9$  Hz,  $(4\text{-MeO-Ph})_2\text{C}=\text{P-P}t\text{Bu}_2$ ;
- 19.66 ppm, (s),  $t\text{Bu}_2\text{PH}$ ;

### B.1.6. *Tert*-butyl phenyl ketone

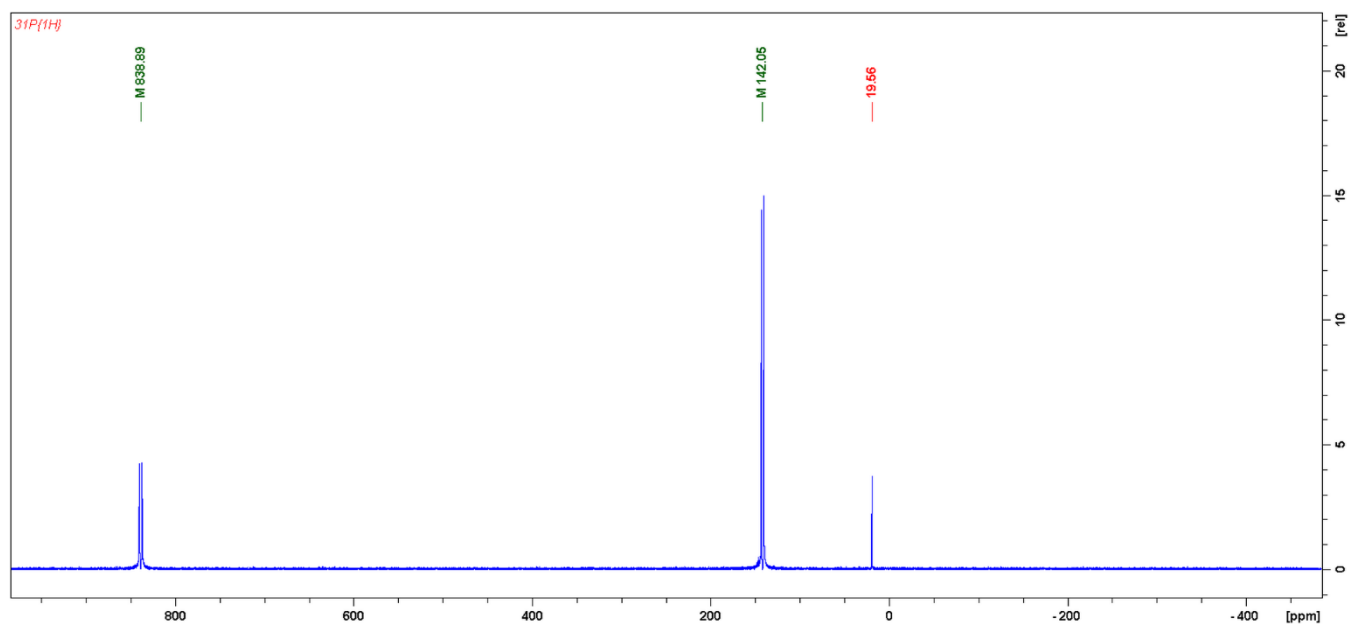

**Figure S6.**  $^{31}\text{P}\{^1\text{H}\}$  NMR (400 MHz,  $\text{C}_6\text{D}_6$ , 298 K) spectrum of reaction mixture conducted 3 months after starting the reaction of **1** with *tert*-butyl phenyl ketone.

- 838.89 ppm, (d),  $J_{\text{P-P}} = 450.5$  Hz,  $[(\text{BDI}^*)\text{Ti}(\text{Cl})\{\eta^2\text{-P-P}t\text{Bu}_2\}]$ ;
- 142.05 ppm, (d),  $J_{\text{P-P}} = 450.5$  Hz,  $[(\text{BDI}^*)\text{Ti}(\text{Cl})\{\eta^2\text{-P-P}t\text{Bu}_2\}]$ ;
- 19.56 ppm, (s),  $t\text{Bu}_2\text{PH}$ ;



### B.1.7. Acetone

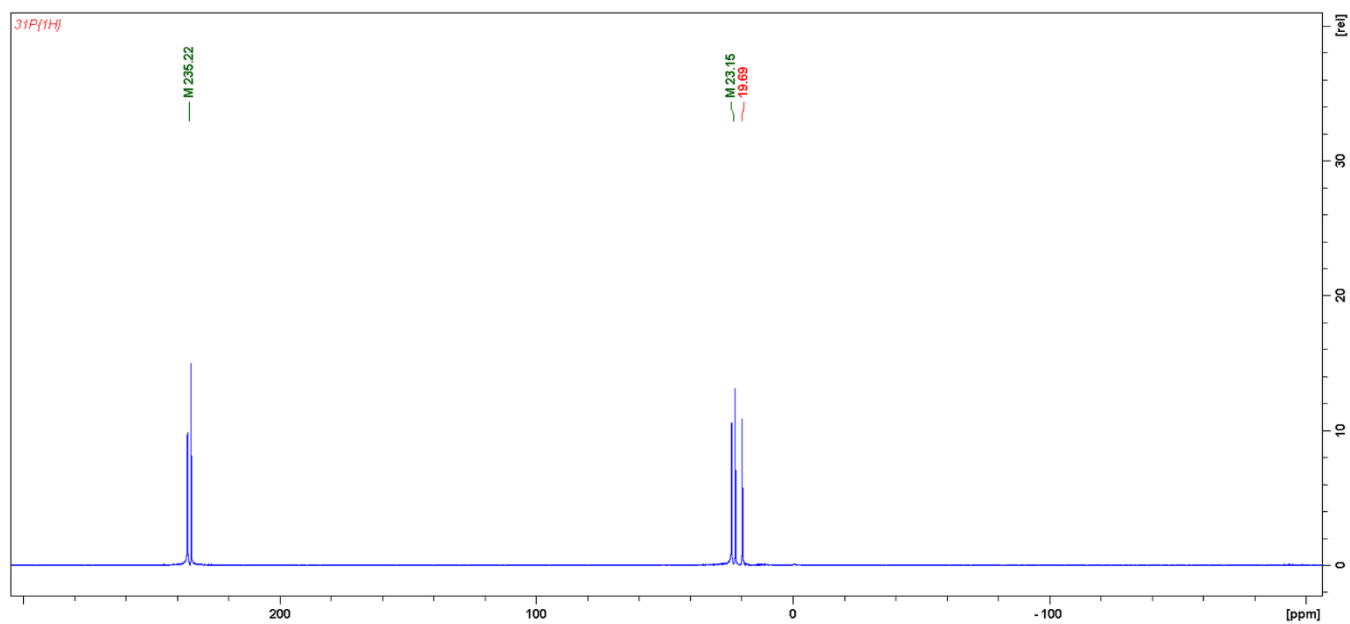

**Figure S7.**  $^{31}\text{P}\{^1\text{H}\}$  NMR (400 MHz,  $\text{C}_6\text{D}_6$ , 298 K) spectrum of the reaction mixture conducted 24 hours after starting the reaction of **1** with acetone.

- 234.73 ppm, (d),  $J_{\text{P-P}} = 228.9$  Hz,  $(\text{Me})_2\text{C}=\text{P}-\text{P}t\text{Bu}_2$ ;
- 23.14 ppm, (d),  $J_{\text{P-P}} = 228.9$  Hz,  $(\text{Me})_2\text{C}=\text{P}-\text{P}t\text{Bu}_2$ ;
- 19.69 ppm, (s),  $t\text{Bu}_2\text{PH}$ ;

### B.1.8. Cyclohexanone

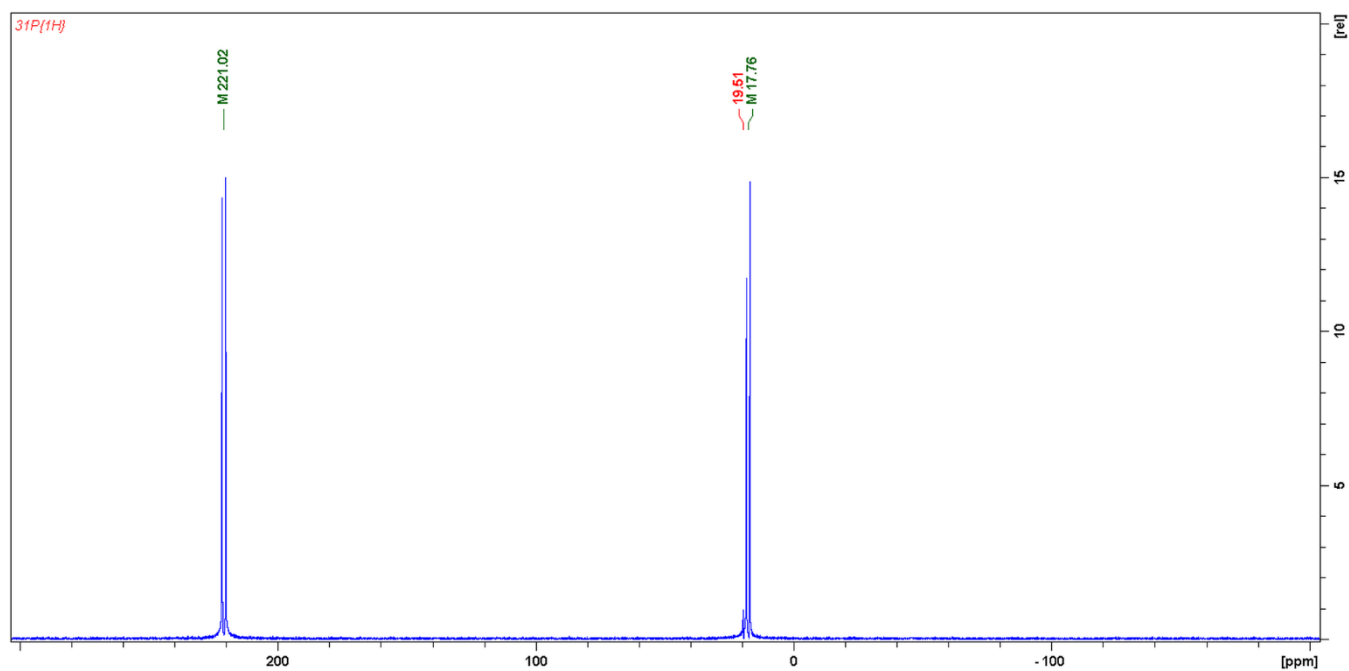

**Figure S8.**  $^{31}\text{P}\{^1\text{H}\}$  NMR (400 MHz,  $\text{C}_6\text{D}_6$ , 298 K) spectrum of the reaction mixture conducted 24 hours after starting the reaction of **1** with cyclohexanone.

- 221.02 ppm, (d),  $J_{\text{P-P}} = 228.8$  Hz,  $(\text{CH}_2)_5\text{C}=\text{P}-\text{P}t\text{Bu}_2$ ;
- 19.51 ppm, (s),  $t\text{Bu}_2\text{PH}$ ;
- 17.76 ppm, (d),  $J_{\text{P-P}} = 228.8$  Hz,  $(\text{CH}_2)_5\text{C}=\text{P}-\text{P}t\text{Bu}_2$ ;

### B.1.9. Acetophenone

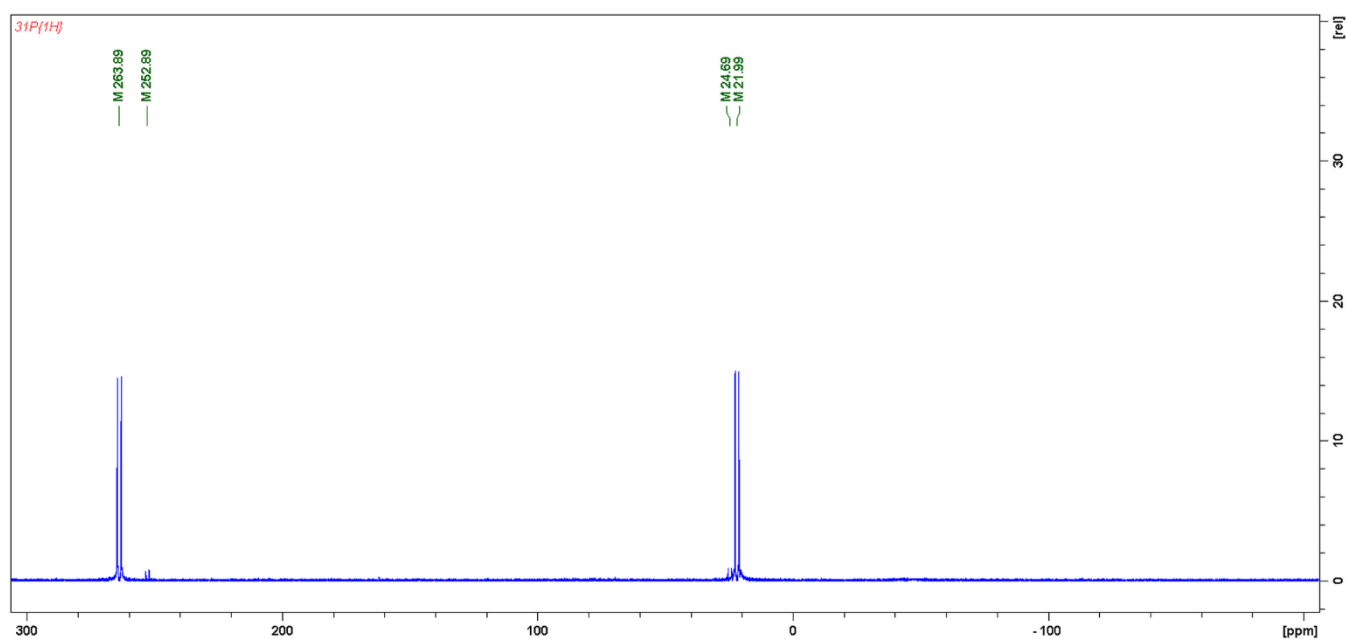

**Figure S9.**  $^{31}\text{P}\{^1\text{H}\}$  NMR (400 MHz,  $\text{C}_6\text{D}_6$ , 298 K) spectrum of the reaction mixture conducted 24 hours after starting the reaction of **1** with acetophenone.

- 263.63 ppm, (d),  $J_{\text{P-P}} = 234.9$  Hz,  $(\text{Ph})(\text{Me})\text{C}=\text{P}-\text{P}t\text{Bu}_2 - E$  isomer;
- 253.06 ppm, (d),  $J_{\text{P-P}} = 222.8$  Hz,  $(\text{Ph})(\text{Me})\text{C}=\text{P}-\text{P}t\text{Bu}_2 - Z$  isomer;
- 24.65 ppm, (d),  $J_{\text{P-P}} = 222.8$  Hz,  $(\text{Ph})(\text{Me})\text{C}=\text{P}-\text{P}t\text{Bu}_2 - Z$  isomer;
- 21.91 ppm, (d),  $J_{\text{P-P}} = 234.9$  Hz,  $(\text{Ph})(\text{Me})\text{C}=\text{P}-\text{P}t\text{Bu}_2 - E$  isomer;
- 19.65  $t\text{Bu}_2\text{PH}$ ;

### B.1.10. Cyclopropyl methyl ketone

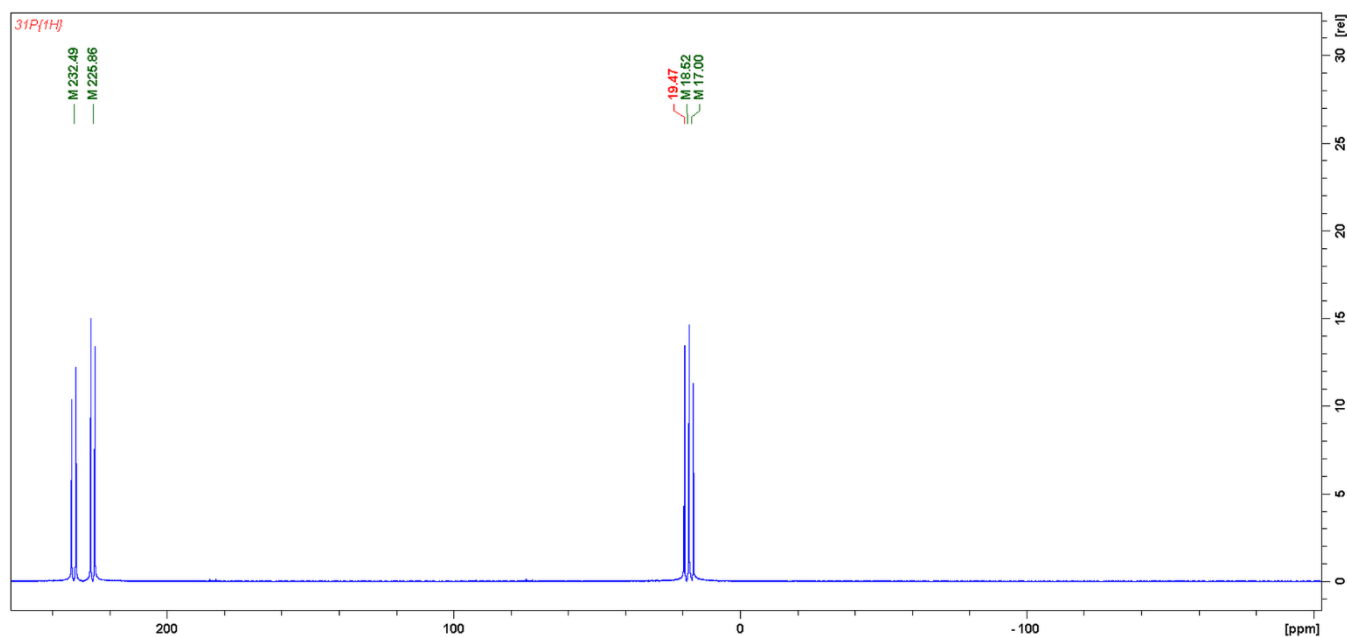

**Figure S10.**  $^{31}\text{P}\{^1\text{H}\}$  NMR (400 MHz,  $\text{C}_6\text{D}_6$ , 298 K) spectrum of the reaction mixture conducted 24 hours after starting the reaction of **1** with cyclopropyl methyl ketone.

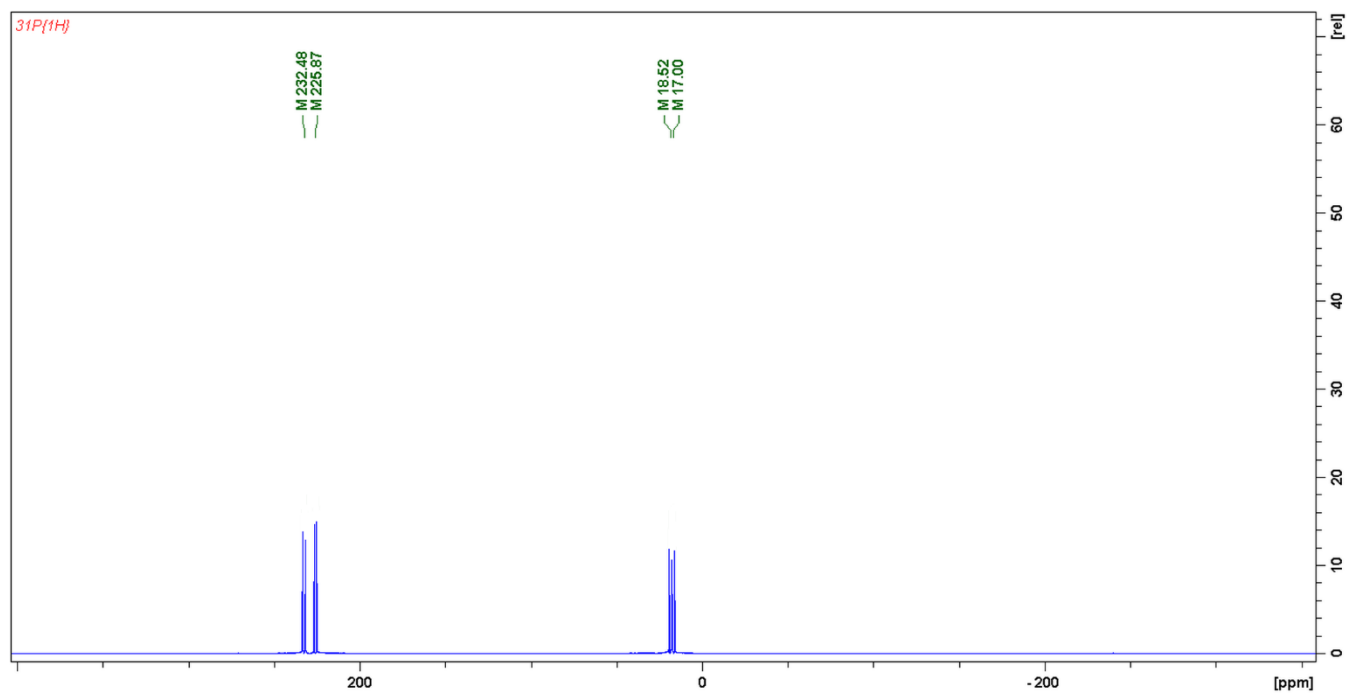

**Figure S11.**  $^{31}\text{P}\{^1\text{H}\}$  NMR (400 MHz,  $\text{C}_6\text{D}_6$ , 298 K) spectrum of isolated (*cyclo*- $\text{CH}_2\text{CH}_2\text{CH}$ )(Me) $\text{C}=\text{P}-\text{PtBu}_2$  (**3j**).

- 232.48 ppm, (d),  $J_{\text{P-P}} = 232.9$  Hz, (*cyclo*- $\text{CH}_2\text{CH}_2\text{CH}$ )(Me) $\text{C}=\text{P}-\text{PtBu}_2$  – Z isomer;
- 225.87 ppm, (d),  $J_{\text{P-P}} = 232.9$  Hz, (*cyclo*- $\text{CH}_2\text{CH}_2\text{CH}$ )(Me) $\text{C}=\text{P}-\text{PtBu}_2$  – E isomer;
- 18.52 ppm, (d),  $J_{\text{P-P}} = 232.9$  Hz, (*cyclo*- $\text{CH}_2\text{CH}_2\text{CH}$ )(Me) $\text{C}=\text{P}-\text{PtBu}_2$  – Z isomer;
- 17.00 ppm, (d),  $J_{\text{P-P}} = 232.9$  Hz, (*cyclo*- $\text{CH}_2\text{CH}_2\text{CH}$ )(Me) $\text{C}=\text{P}-\text{PtBu}_2$  – E isomer;

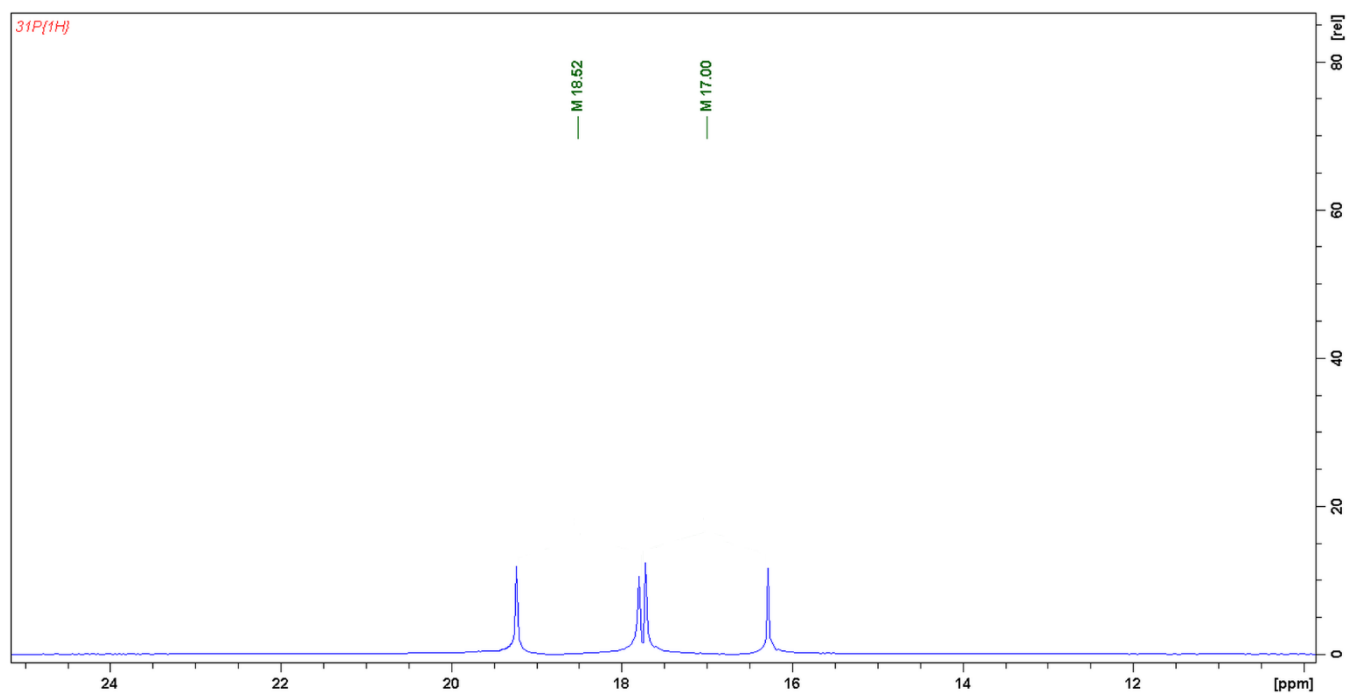

**Figure S12.**  $^{31}\text{P}\{^1\text{H}\}$  NMR (400 MHz,  $\text{C}_6\text{D}_6$ , 298 K) spectrum of isolated (*cyclo*- $\text{CH}_2\text{CH}_2\text{CH}$ )(Me)C=P-PtBu<sub>2</sub> (**3j**) in the range from 25 ppm to 10 ppm.

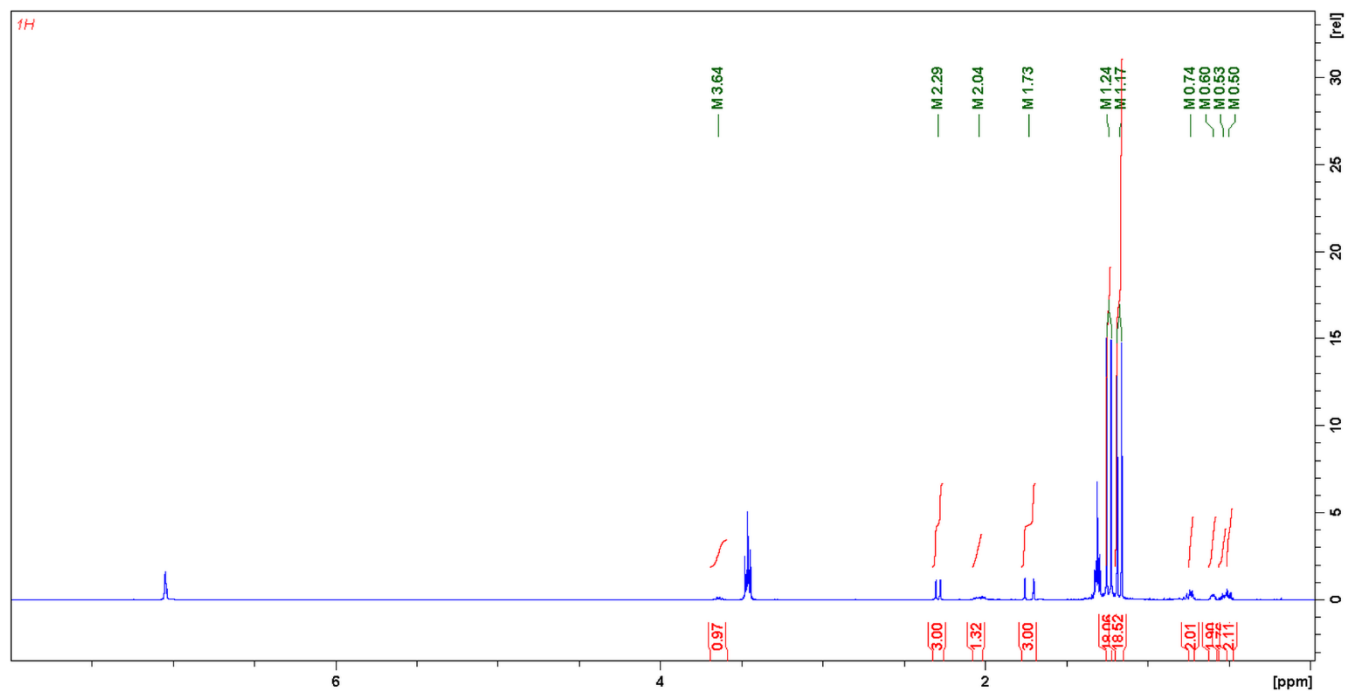

**Figure S13.**  $^1\text{H}$  NMR (400 MHz,  $\text{C}_6\text{D}_6$ , 298 K) spectrum of isolated (*cyclo*- $\text{CH}_2\text{CH}_2\text{CH}$ )( $\text{Me}$ ) $\text{C}=\text{P}-\text{PtBu}_2$  (**3j**).

- 3.64 ppm, (broad m), 1H, (*cyclo*- $\text{CH}_2\text{CH}_2\text{CH}$ )( $\text{Me}$ ) $\text{C}=\text{P}-\text{PtBu}_2$  – *Z* isomer;
- 2.29 ppm, (ddd),  $J_{\text{P-H}} = 10.8$  Hz,  $J_{\text{HH}} = 1.3$  Hz,  $J_{\text{PH}} = 0.4$  Hz, 3H, (*cyclo*- $\text{CH}_2\text{CH}_2\text{CH}$ )( $\text{Me}$ ) $\text{C}=\text{P}-\text{PtBu}_2$  – *E* isomer;
- 2.04 ppm, (broad m), 1H, (*cyclo*- $\text{CH}_2\text{CH}_2\text{CH}$ )( $\text{Me}$ ) $\text{C}=\text{P}-\text{PtBu}_2$  – *E* isomer;
- 1.73 ppm, (dd),  $J_{\text{P-H}} = 21.9$  Hz,  $J_{\text{PH}} = 1.6$  Hz, 3H, (*cyclo*- $\text{CH}_2\text{CH}_2\text{CH}$ )( $\text{Me}$ ) $\text{C}=\text{P}-\text{PtBu}_2$  – *Z* isomer;
- 1.24 ppm, (d),  $J_{\text{P-H}} = 11.2$  Hz, 18H, ( $\text{CH}_2\text{CH}_2\text{CH}$ )(*cyclo*- $\text{CH}_3$ ) $\text{C}=\text{P}-\text{PtBu}_2$  – *E* isomer;
- 1.17 ppm, (d),  $J_{\text{P-H}} = 11.2$  Hz, 18H, (*cyclo*- $\text{CH}_2\text{CH}_2\text{CH}$ )( $\text{Me}$ ) $\text{C}=\text{P}-\text{PtBu}_2$  – *Z* isomer;
- 0.74 ppm, (broad m), 2H, (*cyclo*- $\text{CH}_2\text{CH}_2\text{CH}$ )( $\text{Me}$ ) $\text{C}=\text{P}-\text{PtBu}_2$  – *Z* isomer;
- 0.60 ppm, (broad m), 2H, (*cyclo*- $\text{CH}_2\text{CH}_2\text{CH}$ )( $\text{Me}$ ) $\text{C}=\text{P}-\text{PtBu}_2$  – *Z* isomer;
- 0.53 ppm, (broad m), 2H, (*cyclo*- $\text{CH}_2\text{CH}_2\text{CH}$ )( $\text{Me}$ ) $\text{C}=\text{P}-\text{PtBu}_2$  – *E* isomer;
- 0.50 ppm, (broad m), 2H, (*cyclo*- $\text{CH}_2\text{CH}_2\text{CH}$ )( $\text{Me}$ ) $\text{C}=\text{P}-\text{PtBu}_2$  – *E* isomer;

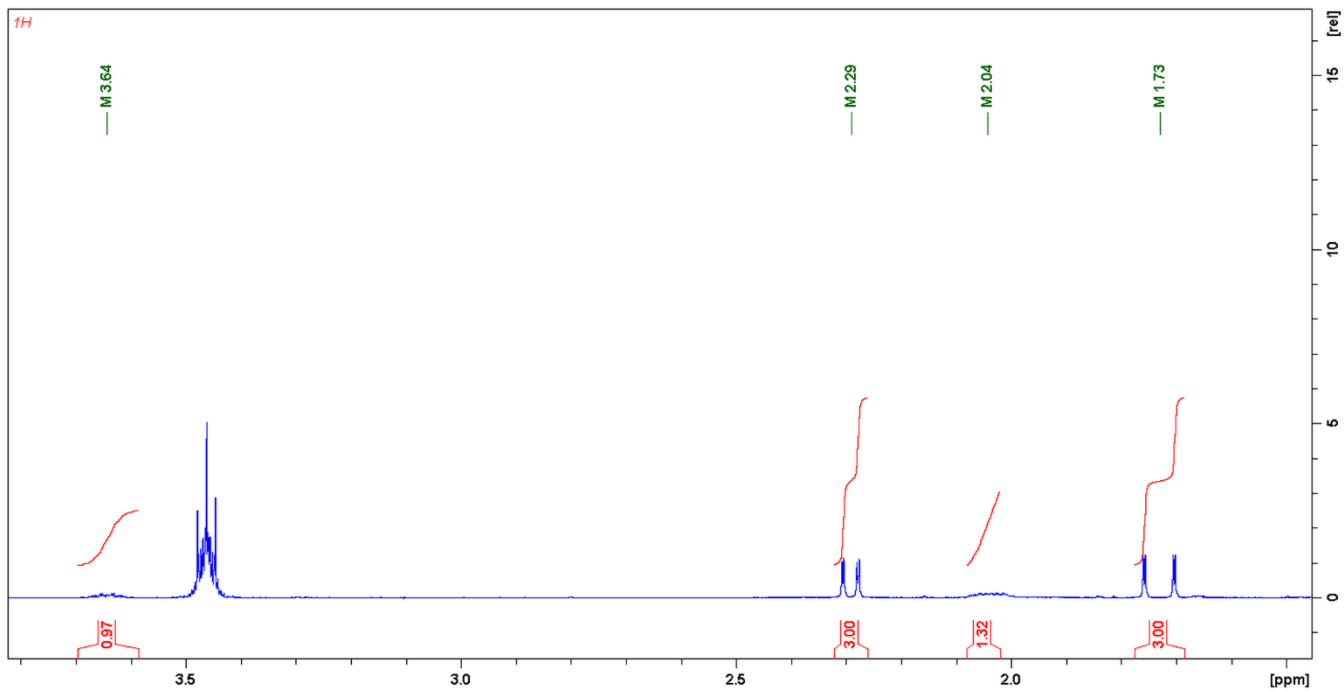

**Figure S14.**  $^1\text{H}$  NMR (400 MHz,  $\text{C}_6\text{D}_6$ , 298 K) spectrum of isolated  $(\text{cyclo-CH}_2\text{CH}_2\text{CH})(\text{Me})\text{C}=\text{P-PtBu}_2$  (**3j**) in the range from 4 ppm to 1.5 ppm.

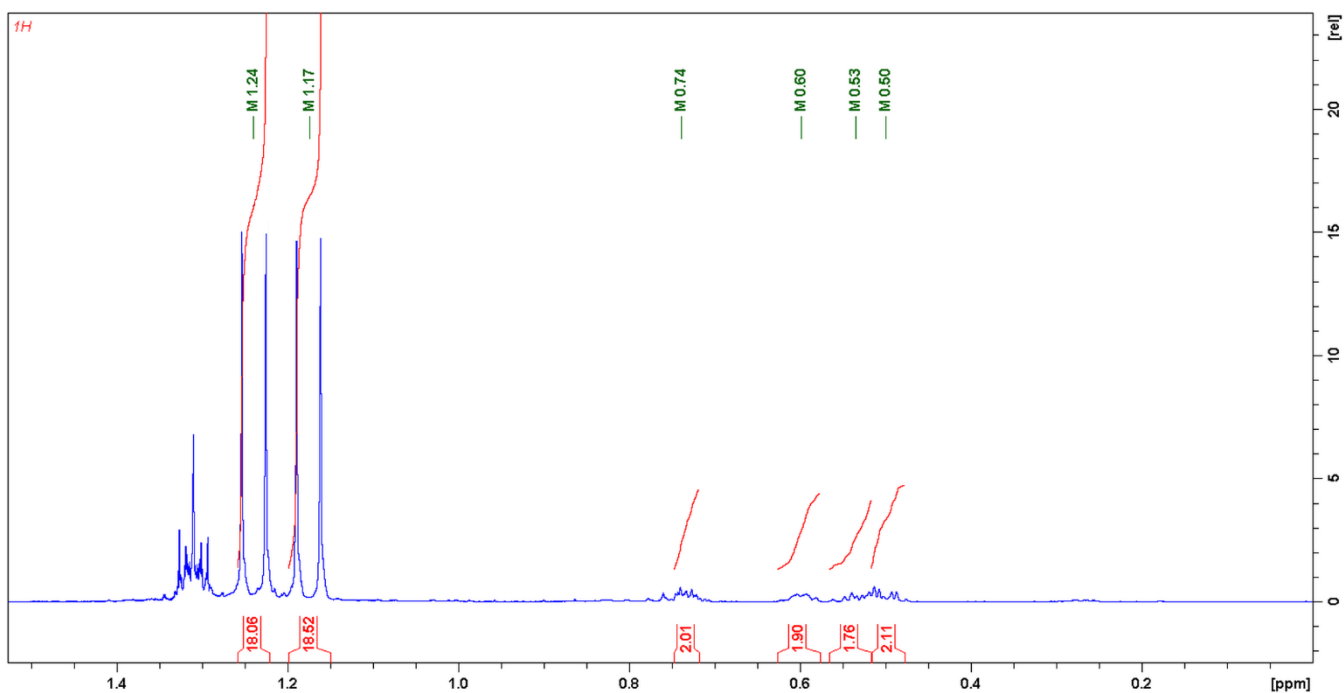

**Figure S15.**  $^1\text{H}$  NMR (400 MHz,  $\text{C}_6\text{D}_6$ , 298 K) spectrum of isolated  $(\text{cyclo-CH}_2\text{CH}_2\text{CH})(\text{Me})\text{C}=\text{P-PtBu}_2$  (**3j**) in the range from 1.5 ppm to 0 ppm.

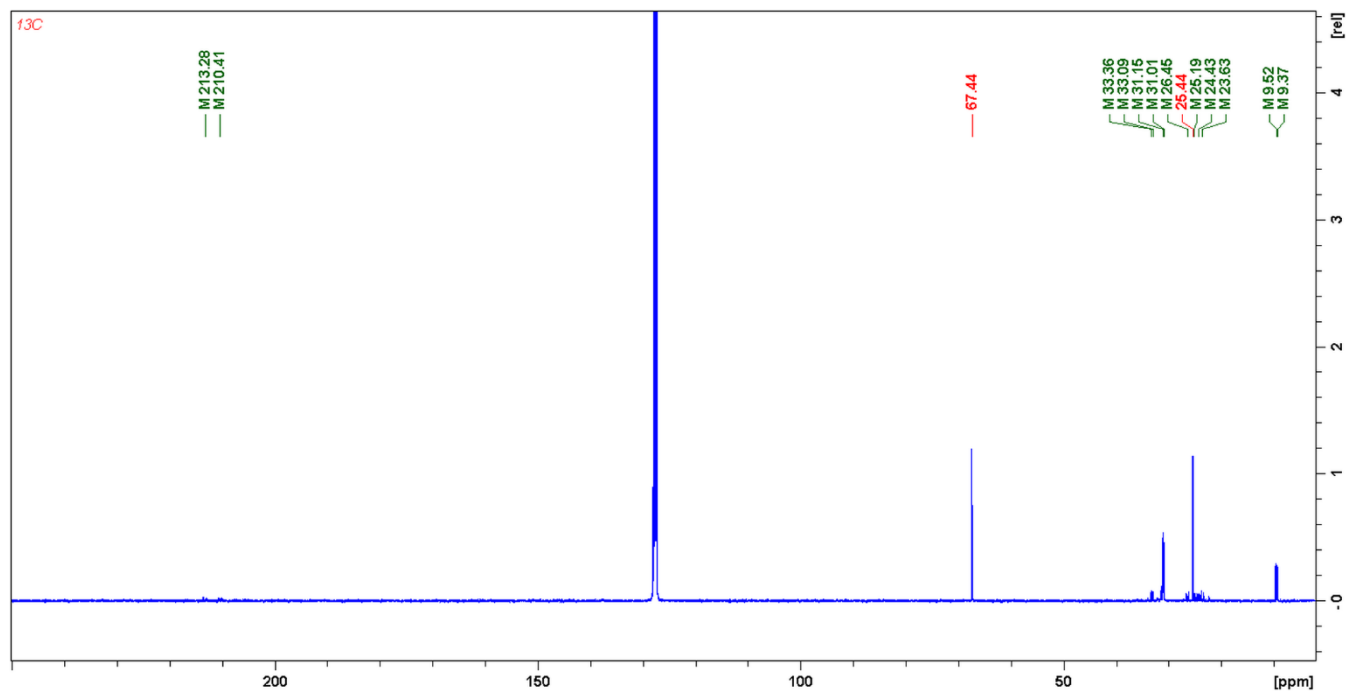

**Figure S16.**  $^{13}\text{C}\{^1\text{H}\}$  NMR (400 MHz,  $\text{C}_6\text{D}_6$ , 298 K) spectrum of isolated  $(\text{cyclo-CH}_2\text{CH}_2\text{CH})(\text{Me})\text{C}=\text{P}t\text{Bu}_2$  (**3j**).

- 213.28 ppm, (dd),  $J_{\text{P-C}} = 53.6$  Hz,  $J_{\text{P-C}} = 14.5$  Hz,  $(\text{cyclo-CH}_2\text{CH}_2\text{CH})(\text{Me})\text{C}=\text{P}t\text{Bu}_2 - E$  isomer;
- 210.41 ppm, (dd),  $J_{\text{P-C}} = 55.4$  Hz,  $J_{\text{P-C}} = 11.8$  Hz,  $(\text{cyclo-CH}_2\text{CH}_2\text{CH})(\text{Me})\text{C}=\text{P}t\text{Bu}_2 - Z$  isomer;
- 33.36 ppm, (dd),  $J_{\text{P-C}} = 9.1$  Hz,  $J_{\text{P-C}} = 4.5$  Hz,  $(\text{cyclo-CH}_2\text{CH}_2\text{CH})(\text{Me})\text{C}=\text{P}-\text{P}\{\text{C}(\text{CH}_3)_3\}_2 - E$  isomer;
- 33.36 ppm, (dd),  $J_{\text{P-C}} = 9.1$  Hz,  $J_{\text{P-C}} = 4.5$  Hz,  $(\text{cyclo-CH}_2\text{CH}_2\text{CH})(\text{Me})\text{C}=\text{P}-\text{P}\{\text{C}(\text{CH}_3)_3\}_2 - Z$  isomer;
- 31.15 ppm, (dd),  $J_{\text{P-C}} = 10.9$  Hz,  $J_{\text{P-C}} = 5.4$  Hz,  $(\text{cyclo-CH}_2\text{CH}_2\text{CH})(\text{Me})\text{C}=\text{P}-\text{P}\{\text{C}(\text{CH}_3)_3\}_2 - E$  isomer;
- 31.01 ppm, (dd),  $J_{\text{P-C}} = 10.9$  Hz,  $J_{\text{P-C}} = 4.5$  Hz,  $(\text{cyclo-CH}_2\text{CH}_2\text{CH})(\text{Me})\text{C}=\text{P}-\text{P}\{\text{C}(\text{CH}_3)_3\}_2 - Z$  isomer;
- 26.45 ppm, (dd),  $J_{\text{P-C}} = 45.4$  Hz,  $J_{\text{P-C}} = 5.4$  Hz,  $(\text{cyclo-CH}_2\text{CH}_2\text{CH})(\text{Me})\text{C}=\text{P}t\text{Bu}_2 - E$  isomer;
- 25.19 ppm, (dd),  $J_{\text{P-C}} = 29.1$  Hz,  $J_{\text{P-C}} = 15.4$  Hz,  $(\text{cyclo-CH}_2\text{CH}_2\text{CH})(\text{CH}_3)\text{C}=\text{P}t\text{Bu}_2 - E$  isomer;
- 24.43 ppm, (dd),  $J_{\text{P-C}} = 38.1$  Hz,  $J_{\text{P-C}} = 17.2$  Hz,  $(\text{cyclo-CH}_2\text{CH}_2\text{CH})(\text{CH}_3)\text{C}=\text{P}t\text{Bu}_2 - Z$  isomer;
- 23.63 ppm, (dd),  $J_{\text{P-C}} = 45.4$  Hz,  $J_{\text{P-C}} = 3.6$  Hz,  $(\text{cyclo-CH}_2\text{CH}_2\text{CH})(\text{Me})\text{C}=\text{P}t\text{Bu}_2 - Z$  isomer;
- 9.52 ppm, (d),  $J_{\text{P-C}} = 2.7$  Hz,  $(\text{cyclo-CH}_2\text{CH}_2\text{CH})(\text{Me})\text{C}=\text{P}t\text{Bu}_2 - Z$  isomer;
- 9.37 ppm, (d),  $J_{\text{P-C}} = 12.7$  Hz,  $(\text{cyclo-CH}_2\text{CH}_2\text{CH})(\text{Me})\text{C}=\text{P}t\text{Bu}_2 - E$  isomer;



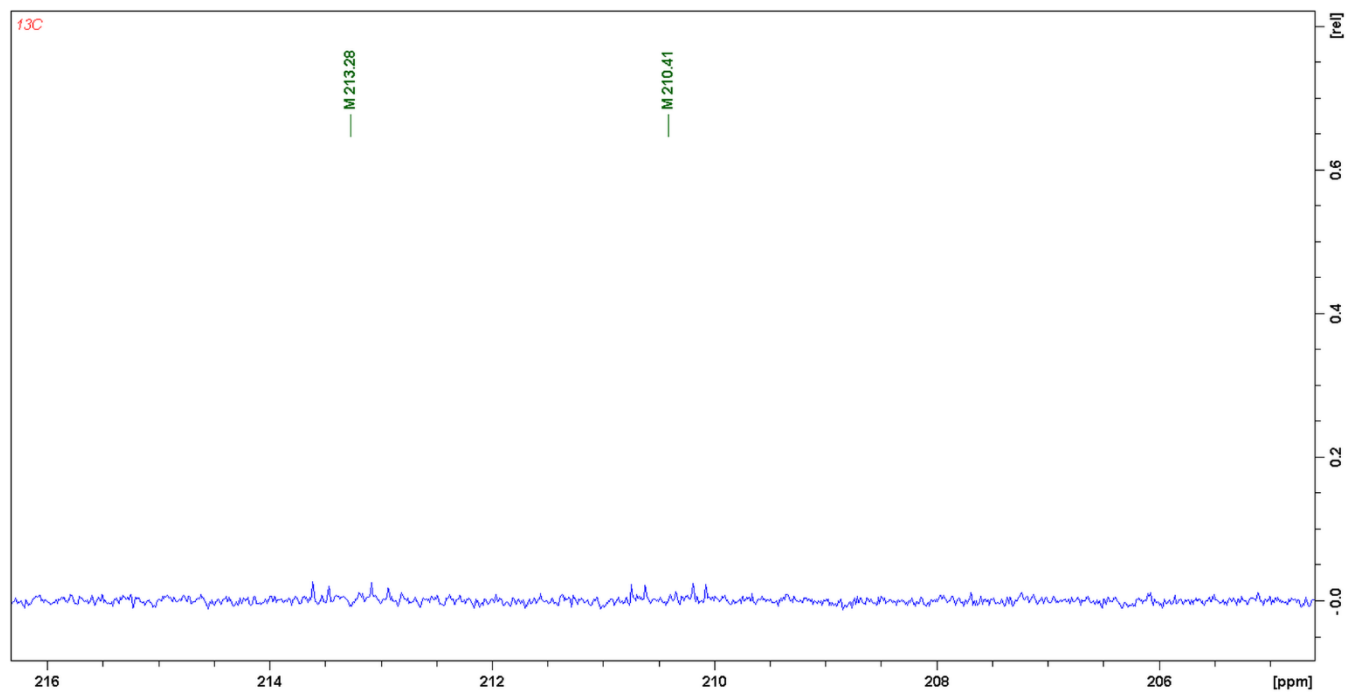

**Figure S17.**  $^{13}\text{C}\{^1\text{H}\}$  NMR (400 MHz,  $\text{C}_6\text{D}_6$ , 298 K) spectrum of isolated  $(\text{CH}_2\text{CH}_2\text{CH})(\text{Me})\text{C}=\text{P}-\text{PtBu}_2$  (**3j**) in the range from 216 ppm to 205 ppm.

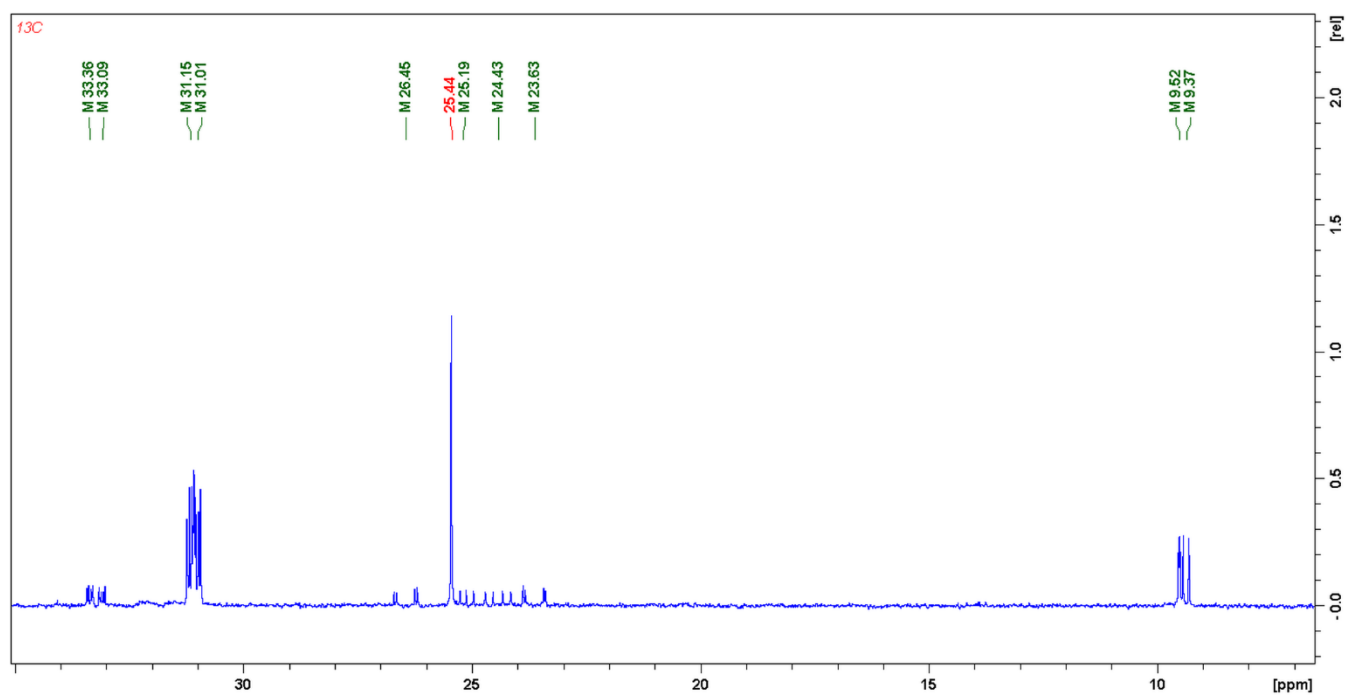

**Figure S18.**  $^{13}\text{C}\{^1\text{H}\}$  NMR (400 MHz,  $\text{C}_6\text{D}_6$ , 298 K) spectrum of isolated  $(\text{CH}_2\text{CH}_2\text{CH})(\text{Me})\text{C}=\text{P}-\text{PtBu}_2$  (**3j**) in the range from 35 ppm to 5 ppm.

### B.1.11. Isobutyraldehyde

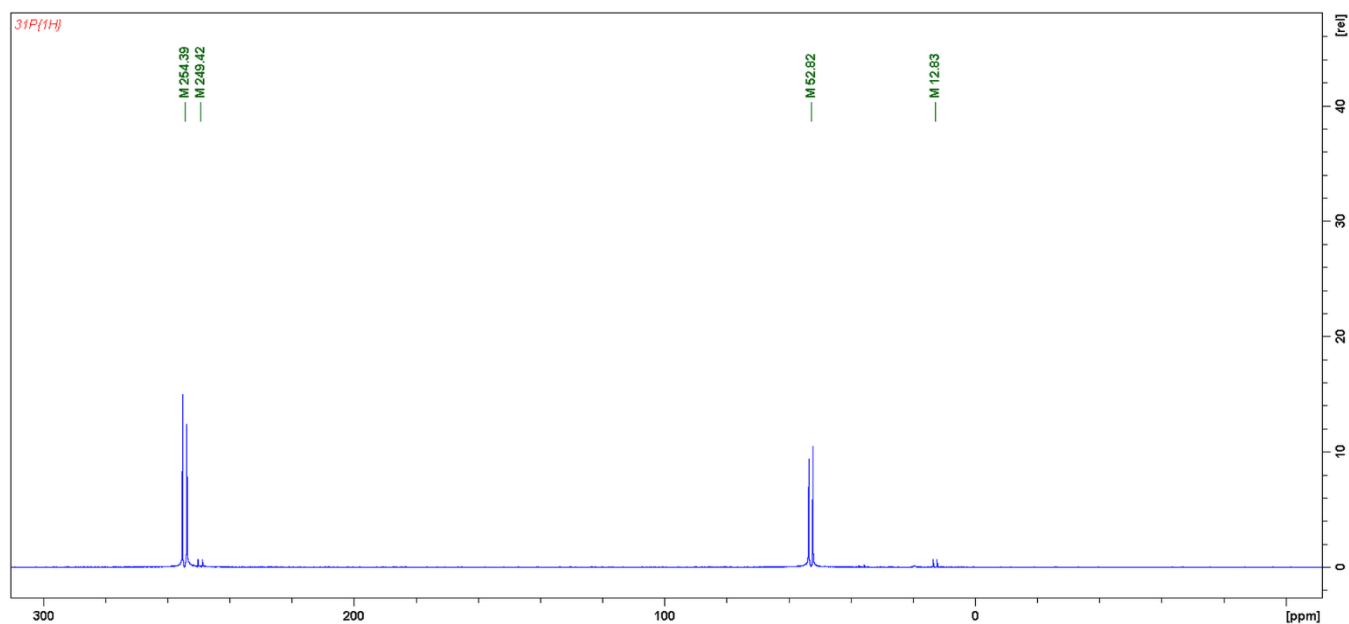

**Figure S19.**  $^{31}\text{P}\{^1\text{H}\}$  NMR (400 MHz,  $\text{C}_6\text{D}_6$ , 298 K) spectrum of the reaction mixture conducted 24 hours after starting the reaction of **1** with isobutyraldehyde.

- 254.39 ppm, (d),  $J_{\text{P-P}} = 220.8$  Hz,  $\{(\text{Me})_2\text{CH}\}(\text{H})\text{C}=\text{P}-\text{P}t\text{Bu}_2 - E$  isomer;
- 249.42 ppm, (d),  $J_{\text{P-P}} = 212.8$  Hz,  $\{(\text{Me})_2\text{CH}\}(\text{H})\text{C}=\text{P}-\text{P}t\text{Bu}_2 - Z$  isomer;
- 52.82 ppm, (d),  $J_{\text{P-P}} = 220.8$  Hz,  $\{(\text{Me})_2\text{CH}\}(\text{H})\text{C}=\text{P}-\text{P}t\text{Bu}_2 - E$  isomer;
- 12.83 ppm, (d),  $J_{\text{P-P}} = 212.8$  Hz,  $\{(\text{Me})_2\text{CH}\}(\text{H})\text{C}=\text{P}-\text{P}t\text{Bu}_2 - Z$  isomer;

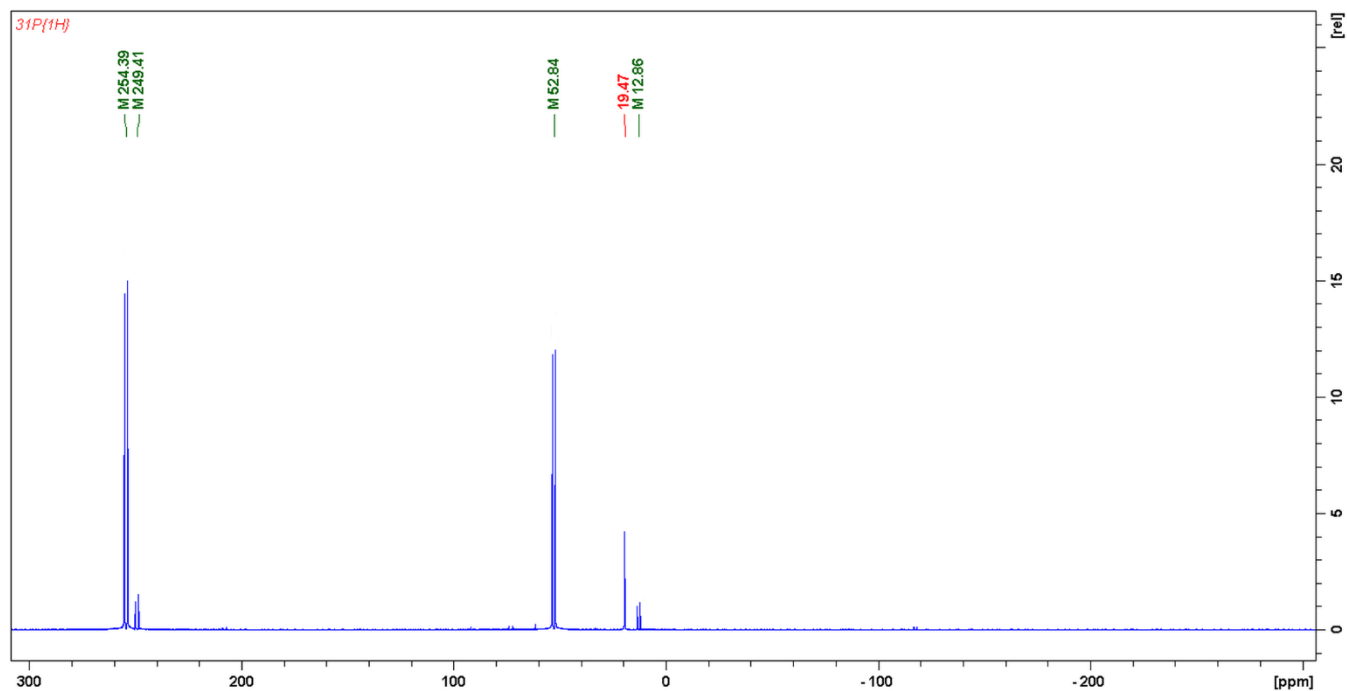

**Figure S20.**  $^{31}\text{P}\{^1\text{H}\}$  NMR (400 MHz,  $\text{C}_6\text{D}_6$ , 298 K) spectrum of isolated  $\{(\text{Me})_2\text{CH}\}(\text{H})\text{C}=\text{P}-\text{PtBu}_2$  (**4a**).

- 254.39 ppm, (d),  $J_{\text{P-P}} = 220.8$  Hz,  $\{(\text{Me})_2\text{CH}\}(\text{H})\text{C}=\text{P}-\text{PtBu}_2 - E$  isomer;
- 249.40 ppm, (d),  $J_{\text{P-P}} = 212.8$  Hz,  $\{(\text{Me})_2\text{CH}\}(\text{H})\text{C}=\text{P}-\text{PtBu}_2 - Z$  isomer;
- 52.83 ppm, (d),  $J_{\text{P-P}} = 220.8$  Hz,  $\{(\text{Me})_2\text{CH}\}(\text{H})\text{C}=\text{P}-\text{PtBu}_2 - E$  isomer;
- 12.85 ppm, (d),  $J_{\text{P-P}} = 212.8$  Hz,  $\{(\text{Me})_2\text{CH}\}(\text{H})\text{C}=\text{P}-\text{PtBu}_2 - Z$  isomer;
- 19.47 ppm, (s),  $t\text{Bu}_2\text{PH}$ ;

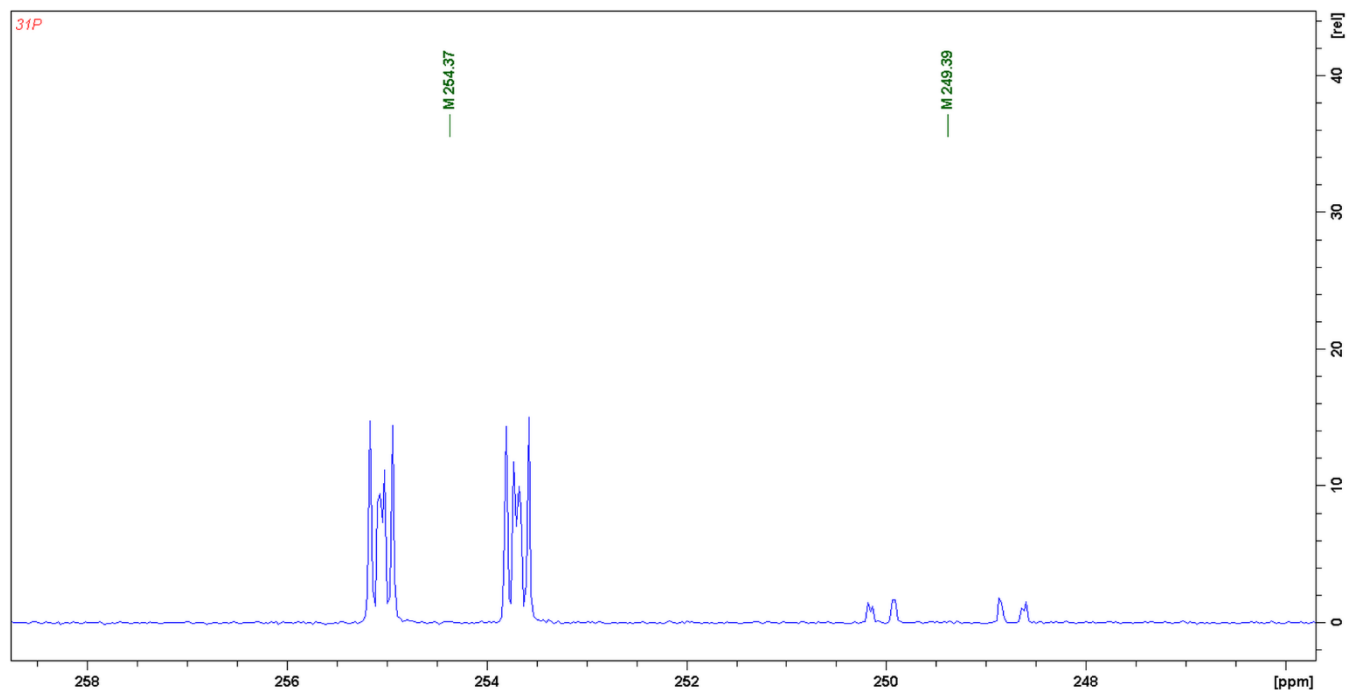

**Figure S21.**  $^{31}\text{P}$  NMR (400 MHz,  $\text{C}_6\text{D}_6$ , 298 K) spectrum of isolated  $\{(\text{Me})_2\text{CH}\}(\text{H})\text{C}=\text{P}-\text{PtBu}_2$  (**4a**) in the range from 258 ppm to 247 ppm.

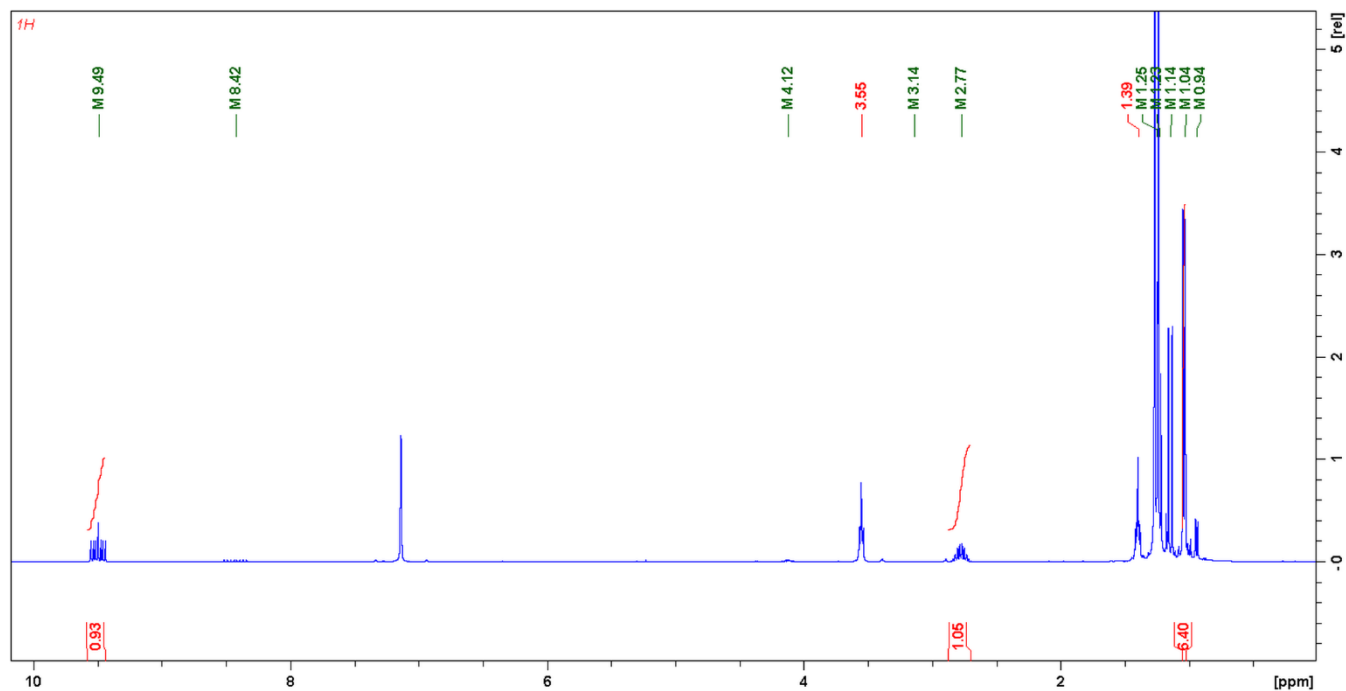

**Figure S22.**  $^1\text{H}$  NMR (400 MHz,  $\text{C}_6\text{D}_6$ , 298 K) spectrum of isolated  $\{(\text{Me})_2\text{CH}\}(\text{H})\text{C}=\text{P}-\text{PtBu}_2$  (**4a**).

- 9.49 ppm, (ddd), 1H,  $J_{\text{P-H}} = 24.1$  Hz,  $J_{\text{P-H}} = 12.0$  Hz,  $J_{\text{P-H}} = 8.1$  Hz,  $\{(\text{Me})_2\text{CH}\}(\text{H})\text{C}=\text{P}-\text{PtBu}_2 - E$  isomer;
- 8.42 ppm, (ddd), 1H,  $J_{\text{P-H}} = 36.1$  Hz,  $J_{\text{H-H}} = 20.9$  Hz,  $J_{\text{P-H}} = 8.0$  Hz,  $\{(\text{Me})_2\text{CH}\}(\text{H})\text{C}=\text{P}-\text{PtBu}_2 - Z$  isomer;
- 4.12 ppm, (br. m), 1H,  $J_{\text{H-H}} = 6.7$  Hz,  $\{(\text{Me})_2\text{CH}\}(\text{H})\text{C}=\text{P}-\text{PtBu}_2 - Z$  isomer;
- 3.55 ppm, (m), 4H, THF;
- 3.14 ppm, (d), 1H,  $J_{\text{P-H}} = 197.8$  Hz,  $t\text{Bu}_2\text{PH}$ ;
- 2.77 ppm, (br. m), 1H,  $J_{\text{H-H}} = 6.7$  Hz,  $\{(\text{Me})_2\text{CH}\}(\text{H})\text{C}=\text{P}-\text{PtBu}_2 - E$  isomer;
- 1.39 ppm, (m), 4H, THF;
- 1.25 ppm, (d), 18H,  $J_{\text{P-H}} = 11.3$  Hz,  $\{(\text{Me})_2\text{CH}\}(\text{H})\text{C}=\text{P}-\text{PtBu}_2 - E$  isomer;
- 1.23 ppm, (d), 18H,  $J_{\text{P-H}} = 11.2$  Hz,  $\{(\text{Me})_2\text{CH}\}(\text{H})\text{C}=\text{P}-\text{PtBu}_2 - Z$  isomer;
- 1.14 ppm, (d),  $J_{\text{P-H}} = 11.4$  Hz,  $t\text{Bu}_2\text{PH}$ ;
- 1.04 ppm, (dd), 6H,  $J_{\text{H-H}} = 6.7$  Hz,  $J_{\text{P-H}} = 0.8$  Hz,  $\{(\text{Me})_2\text{CH}\}(\text{H})\text{C}=\text{P}-\text{PtBu}_2 - E$  isomer;
- 0.94 ppm, (br. d), 6H,  $J_{\text{H-H}} = 6.7$  Hz,  $\{(\text{Me})_2\text{CH}\}(\text{H})\text{C}=\text{P}-\text{PtBu}_2 - Z$  isomer;

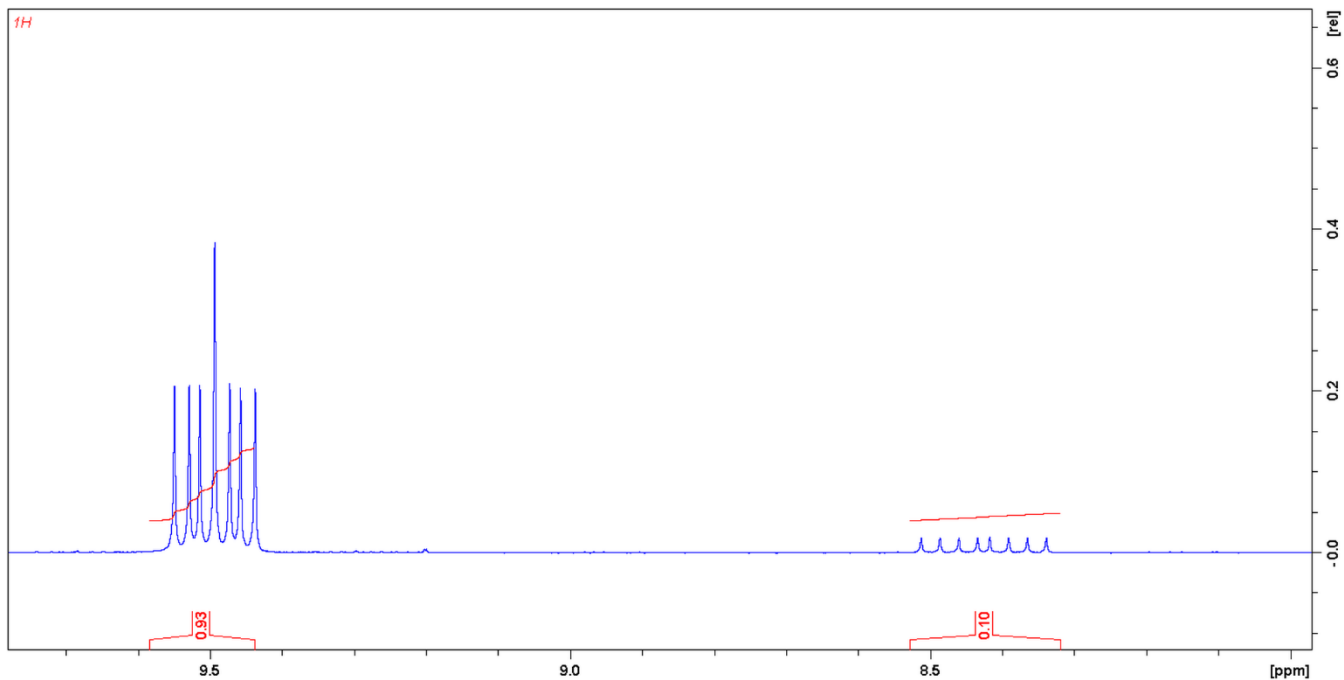

**Figure S23.**  $^1\text{H}$  NMR (400 MHz,  $\text{C}_6\text{D}_6$ , 298 K) spectrum of isolated  $\{(\text{Me})_2\text{CH}\}(\text{H})\text{C}=\text{P}-\text{PtBu}_2$  (**4a**) in the aldehyde proton range. The integration shows the ratio of two isomers *E* : *Z* (90 % : 10 %).

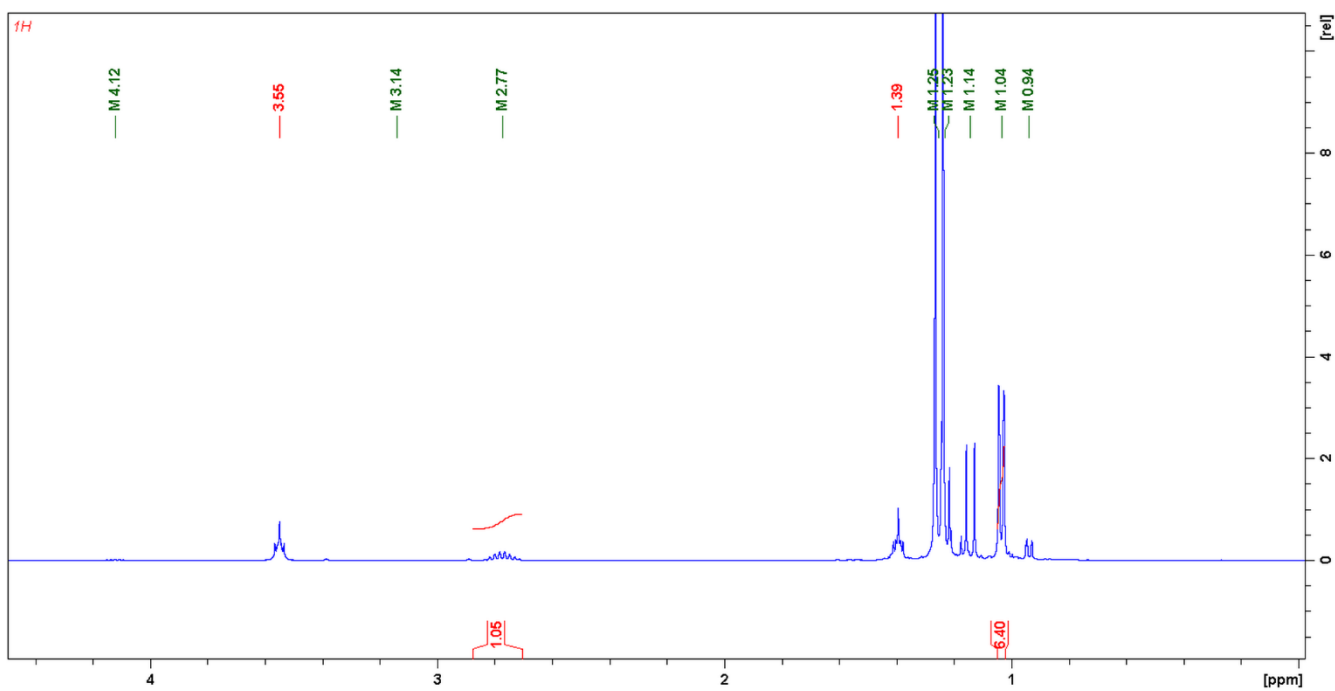

**Figure S24.**  $^1\text{H}$  NMR (400 MHz,  $\text{C}_6\text{D}_6$ , 298 K) spectrum of isolated  $\{(\text{Me})_2\text{CH}\}(\text{H})\text{C}=\text{P}-\text{PtBu}_2$  (**4a**) in the range of 4.5 ppm to 0 ppm.

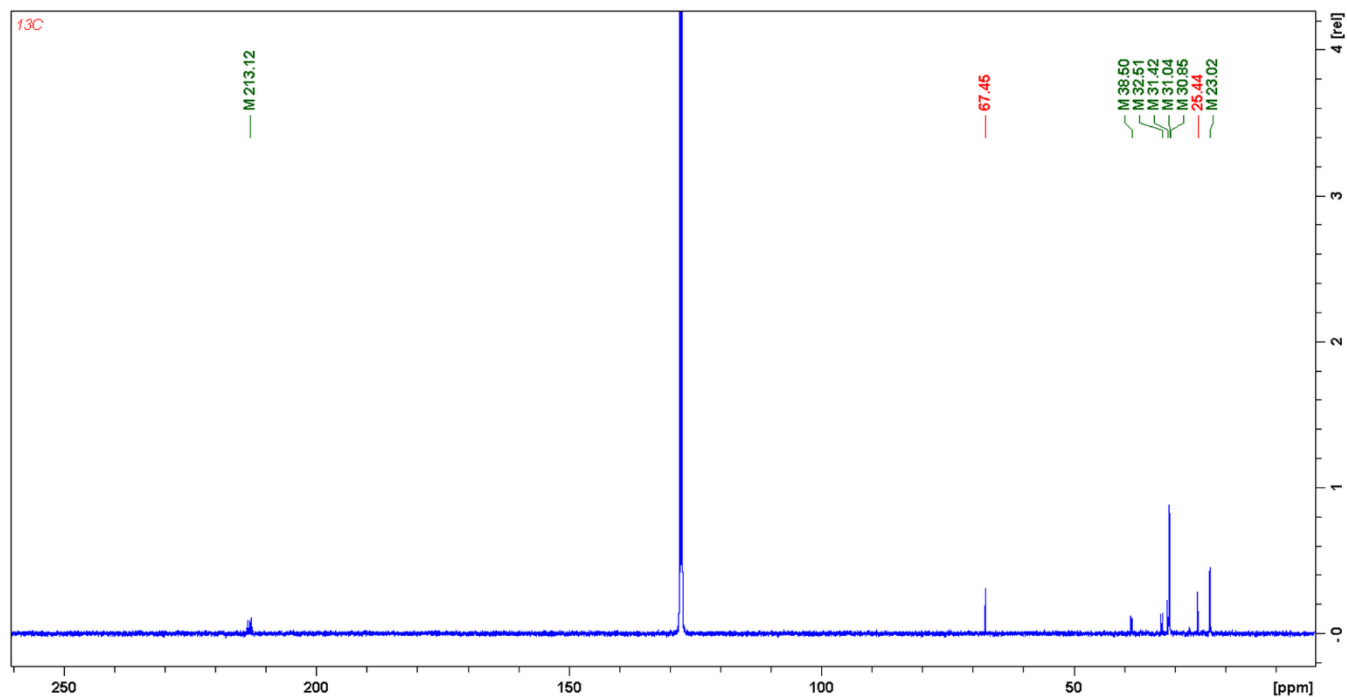

**Figure S25.**  $^{13}\text{C}\{^1\text{H}\}$  NMR (400 MHz,  $\text{C}_6\text{D}_6$ , 298 K) spectrum of isolated  $\{(\text{Me})_2\text{CH}\}(\text{H})\text{C}=\text{P}-\text{PtBu}_2$  (**4a**).

Only *E* isomer was visible, the weak signals of the *Z* isomer were not visible.

- 213.12 ppm, (dd),  $J_{\text{P-C}} = 49.0$  Hz,  $J_{\text{P-C}} = 33.6$  Hz,  $\{(\text{Me})_2\text{CH}\}(\text{H})\text{C}=\text{P}-\text{PtBu}_2$ ;
- 38.50 ppm, (dd),  $J_{\text{P-C}} = 19.9$  Hz,  $J_{\text{P-C}} = 13.6$  Hz,  $\{(\text{Me})_2\text{CH}\}(\text{H})\text{C}=\text{P}-\text{PtBu}_2$ ;
- 32.51 ppm, (dd),  $J_{\text{P-C}} = 28.2$  Hz,  $J_{\text{P-C}} = 2.7$  Hz Hz,  $\{(\text{Me})_2\text{CH}\}(\text{H})\text{C}=\text{P}-\text{P}\{\text{C}(\text{CH}_3)_3\}_2$ ;
- 31.04 ppm, (dd),  $J_{\text{P-C}} = 19.9$  Hz,  $J_{\text{P-C}} = 5.4$  Hz,  $\{(\text{Me})_2\text{CH}\}(\text{H})\text{C}=\text{P}-\text{P}\{\text{C}(\text{CH}_3)_3\}_2$ ;
- 23.02 ppm, (d),  $J_{\text{P-C}} = 12.7$  Hz,  $\{(\text{Me})_2\text{CH}\}(\text{H})\text{C}=\text{P}-\text{PtBu}_2$
- 31.42 ppm, (d),  $J_{\text{P-C}} = 13.6$  Hz,  $\{(\text{CH}_3)_3\text{C}\}_2\text{PH}$ ;
- 30.85 ppm, (d),  $J_{\text{P-C}} = 4.5$  Hz,  $\{(\text{CH}_3)_3\text{C}\}_2\text{PH}$ ;

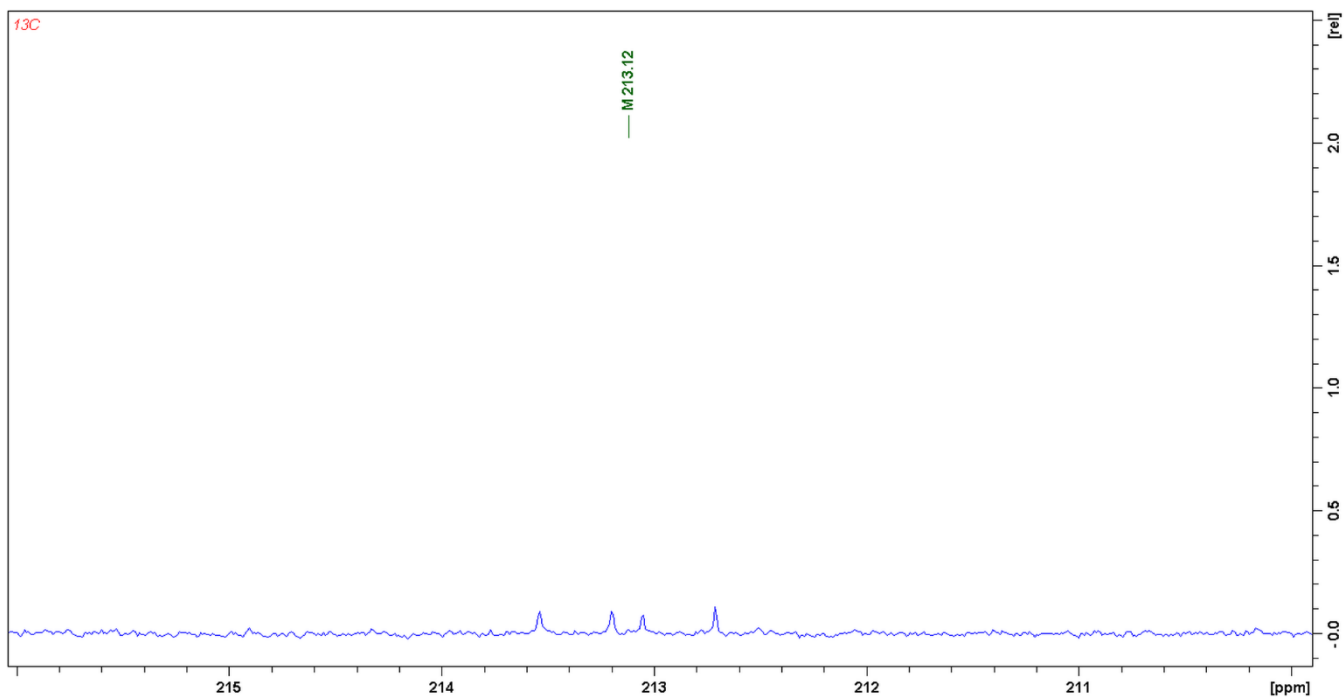

**Figure S26.**  $^{13}\text{C}\{^1\text{H}\}$  NMR (400 MHz,  $\text{C}_6\text{D}_6$ , 298 K) spectrum of isolated  $\{(\text{Me})_2\text{CH}\}(\text{H})\text{C}=\text{P}-\text{P}t\text{Bu}_2$  (**4a**) in the range from 216 ppm to 210 ppm.

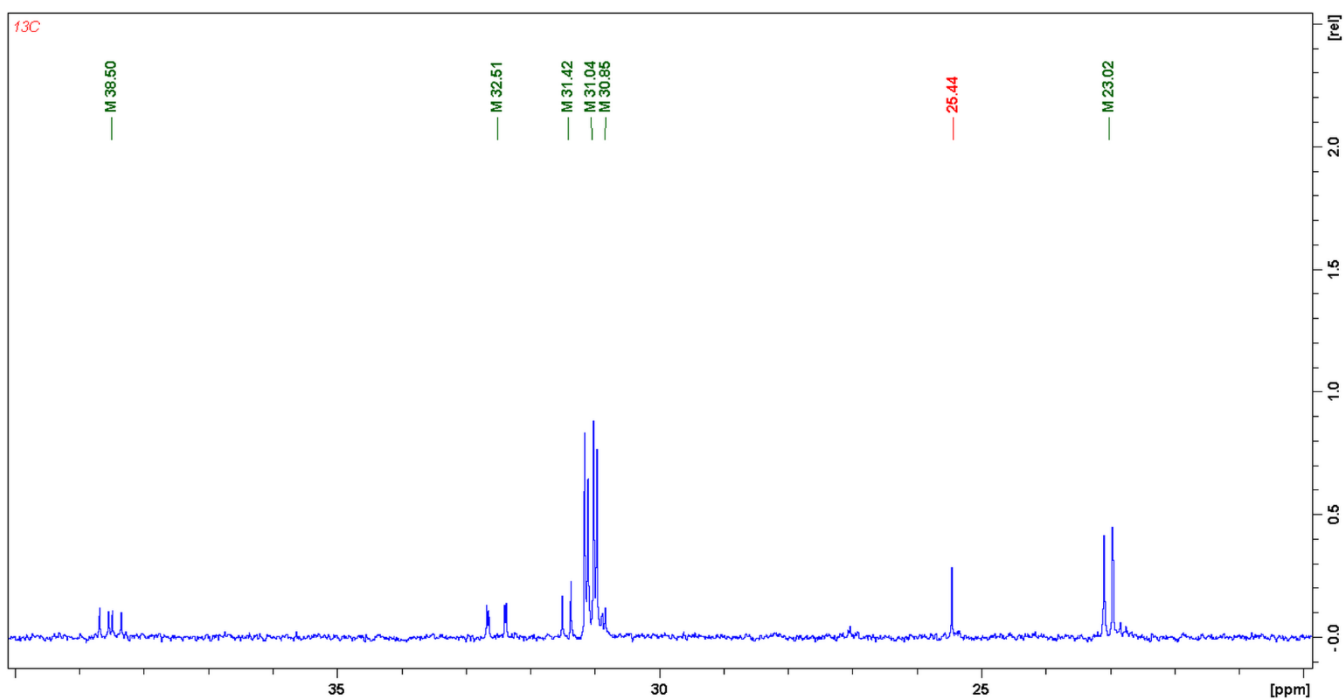

**Figure S27.**  $^{13}\text{C}\{^1\text{H}\}$  NMR (400 MHz,  $\text{C}_6\text{D}_6$ , 298 K) spectrum of isolated  $\{(\text{Me})_2\text{CH}\}(\text{H})\text{C}=\text{P}-\text{P}t\text{Bu}_2$  (**4a**) in the range from 40 ppm to 20 ppm.

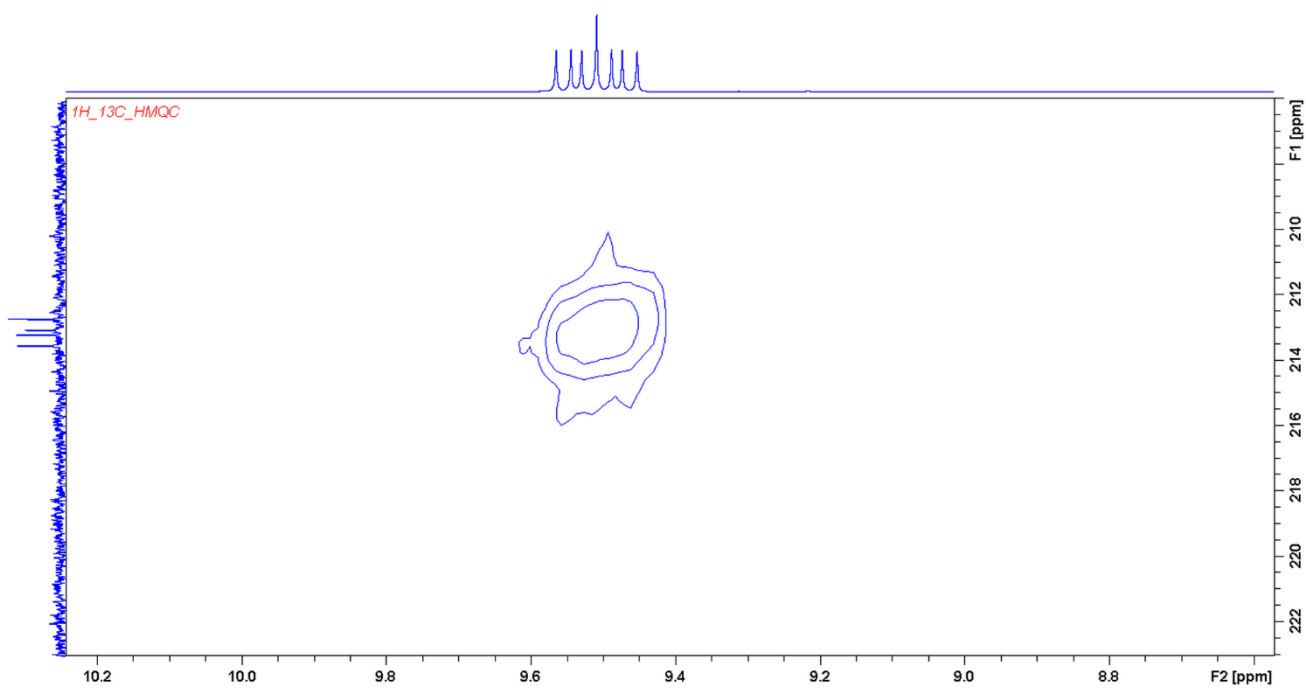

**Figure S28.**  $^{13}\text{C}\{^1\text{H}\}/^1\text{H}$ -HMQC (400 MHz,  $\text{C}_6\text{D}_6$ , 298 K) spectrum of isolated  $\{(\text{Me})_2\text{CH}\}(\text{H})\text{C}=\text{P}-\text{PtBu}_2$  (**4a**).



## B.1.12. Cyclohexanecarboxaldehyde

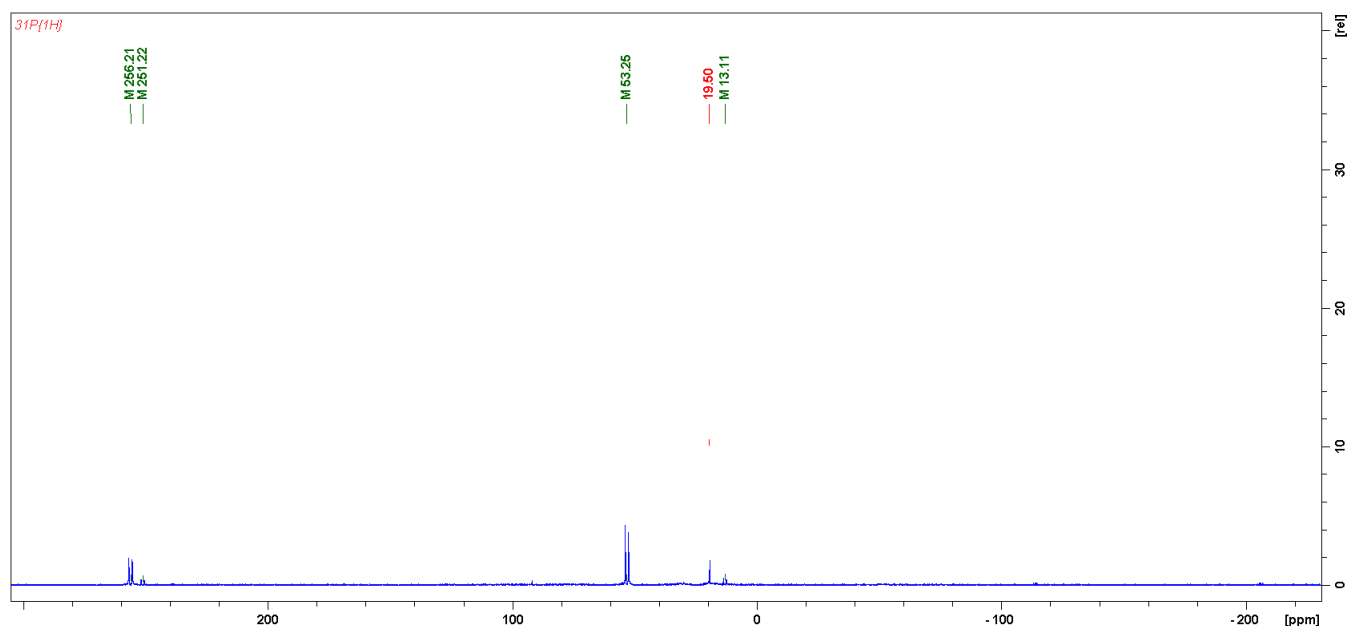

**Figure S29.**  $^{31}\text{P}\{^1\text{H}\}$ -NMR (400 MHz,  $\text{C}_6\text{D}_6$ , 298 K) spectrum of the reaction mixture conducted 24 hours after starting the reaction of **1** with cyclohexanecarboxaldehyde.

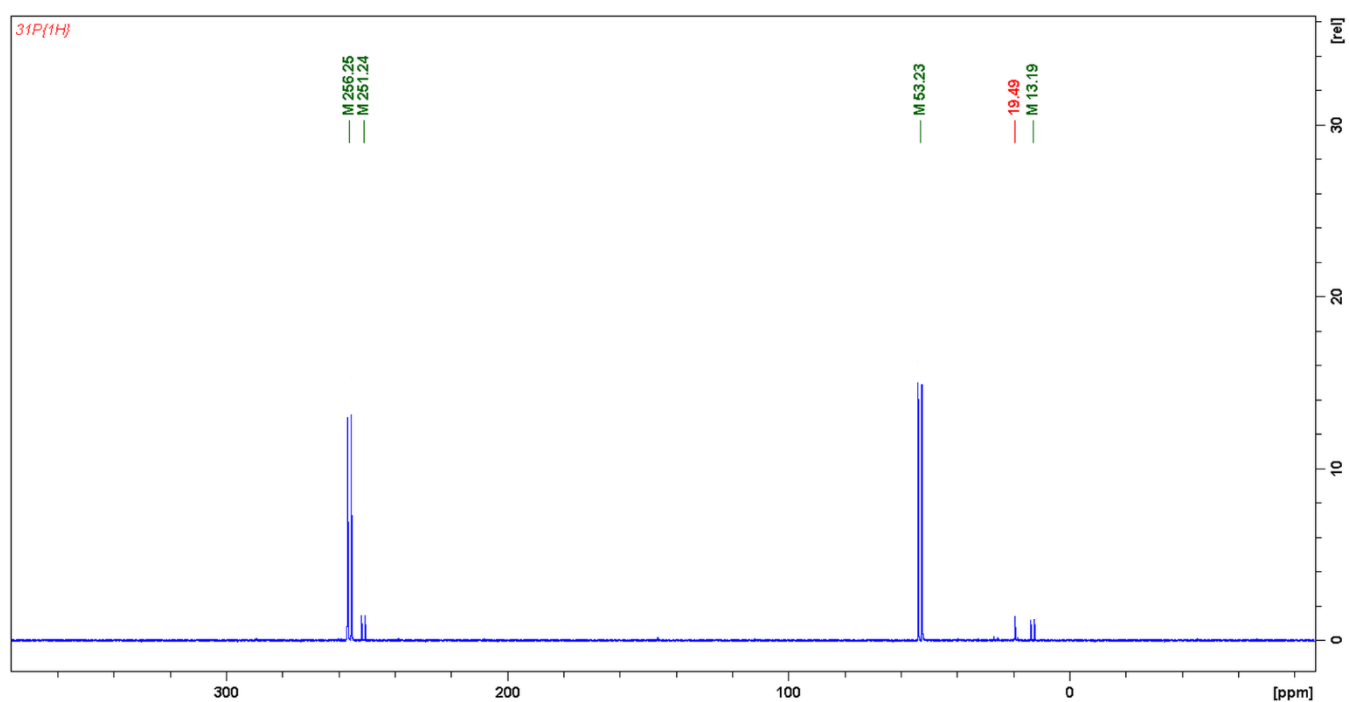

**Figure S30.**  $^{31}\text{P}\{^1\text{H}\}$  NMR (400 MHz,  $\text{C}_6\text{D}_6$ , 298 K) spectrum of isolated  $\{\text{cyclo}-(\text{CH}_2)_4\text{CH}\}(\text{H})\text{C}=\text{P}-\text{PtBu}_2$  (**4b**).

- 256.25 ppm, (d),  $J_{\text{P-P}} = 220.8$  Hz,  $\{\text{cyclo}-(\text{CH}_2)_4\text{CH}\}(\text{H})\text{C}=\text{P}-\text{PtBu}_2$  – *E* isomer;
- 251.24 ppm, (d),  $J_{\text{P-P}} = 212.8$  Hz,  $\{\text{cyclo}-(\text{CH}_2)_4\text{CH}\}(\text{H})\text{C}=\text{P}-\text{PtBu}_2$  – *Z* isomer;
- 53.23 ppm, (d),  $J_{\text{P-P}} = 220.8$  Hz,  $\{\text{cyclo}-(\text{CH}_2)_4\text{CH}\}(\text{H})\text{C}=\text{P}-\text{PtBu}_2$  – *E* isomer;
- 13.17 ppm, (d),  $J_{\text{P-P}} = 212.8$  Hz,  $\{\text{cyclo}-(\text{CH}_2)_4\text{CH}\}(\text{H})\text{C}=\text{P}-\text{PtBu}_2$  – *Z* isomer;
- 19.49 ppm, (s),  $t\text{Bu}_2\text{PH}$ ;

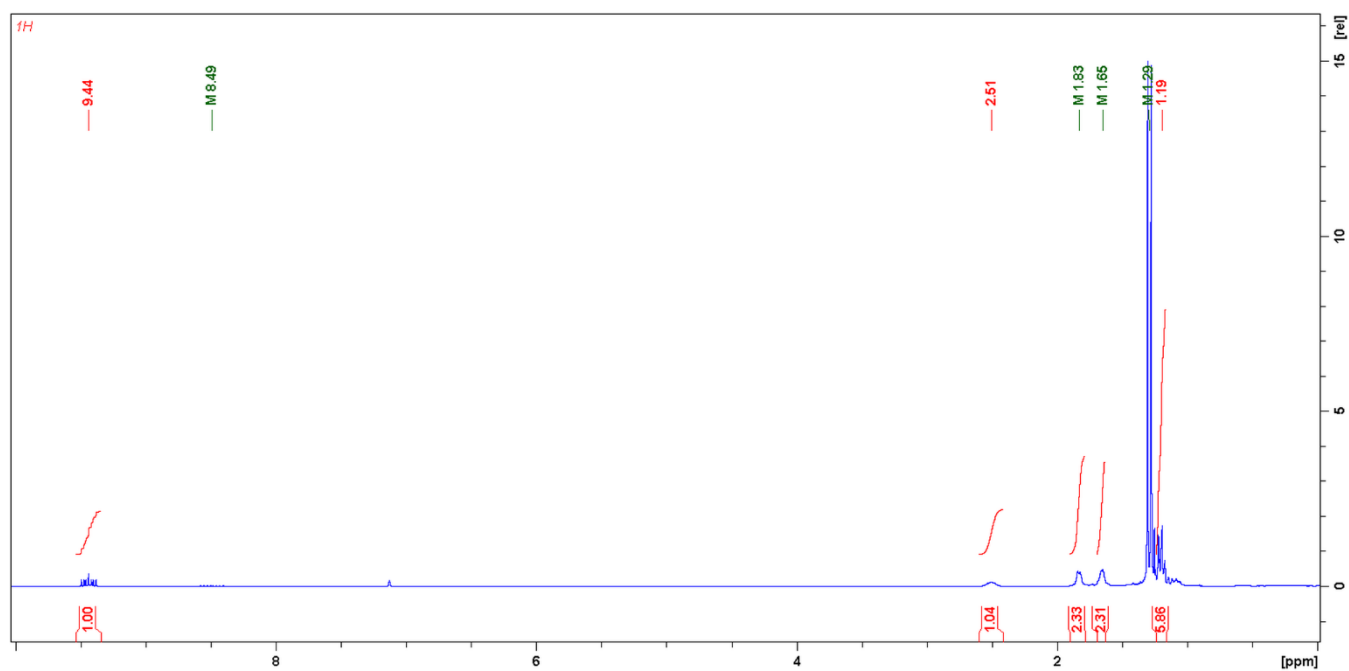

**Figure S31.**  $^1\text{H}$  NMR (400 MHz,  $\text{C}_6\text{D}_6$ , 298 K) spectrum of isolated  $\{\text{cyclo}-(\text{CH}_2)_4\text{CH}\}(\text{H})\text{C}=\text{P}-\text{PtBu}_2$  (**4b**).

- 9.44 ppm, (ddd), 1H,  $J_{\text{P-H}} = 22.7$  Hz,  $J_{\text{P-H}} = 14.2$  Hz,  $J_{\text{H-H}} = 8.4$  Hz,  $\{\text{cyclo}-(\text{CH}_2)_4\text{CH}\}(\text{H})\text{C}=\text{P}-\text{PtBu}_2 - E$  isomer;
- 8.49 ppm, (ddd), 1H,  $J_{\text{P-H}} = 31.9$  Hz,  $J_{\text{P-H}} = 21.5$  Hz,  $J_{\text{H-H}} = 10.9$  Hz,  $\{\text{cyclo}-(\text{CH}_2)_4\text{CH}\}(\text{H})\text{C}=\text{P}-\text{PtBu}_2 - Z$  isomer;
- 2.51 ppm, (broad m), 1H,  $\{\text{cyclo}-(\text{CH}_2)_4\text{CH}\}(\text{H})\text{C}=\text{P}-\text{PtBu}_2 - E$  isomer;
- 1.83 ppm, (broad m), 2H,  $\{\text{cyclo}-(\text{CH}_2)_4\text{CH}\}(\text{H})\text{C}=\text{P}-\text{PtBu}_2 - E$  isomer;
- 1.65 ppm, (broad m), 2H,  $\{\text{cyclo}-(\text{CH}_2)_4\text{CH}\}(\text{H})\text{C}=\text{P}-\text{PtBu}_2 - E$  isomer;
- 1.29 ppm, (d),  $J_{\text{P-H}} = 11.1$  Hz,  $\{\text{cyclo}-(\text{CH}_2)_4\text{CH}\}(\text{H})\text{C}=\text{P}-\text{PtBu}_2 - E$  isomer;
- 1.19 ppm, (broad m), 6H,  $\{\text{cyclo}-(\text{CH}_2)_4\text{CH}\}(\text{H})\text{C}=\text{P}-\text{PtBu}_2 - E$  isomer;

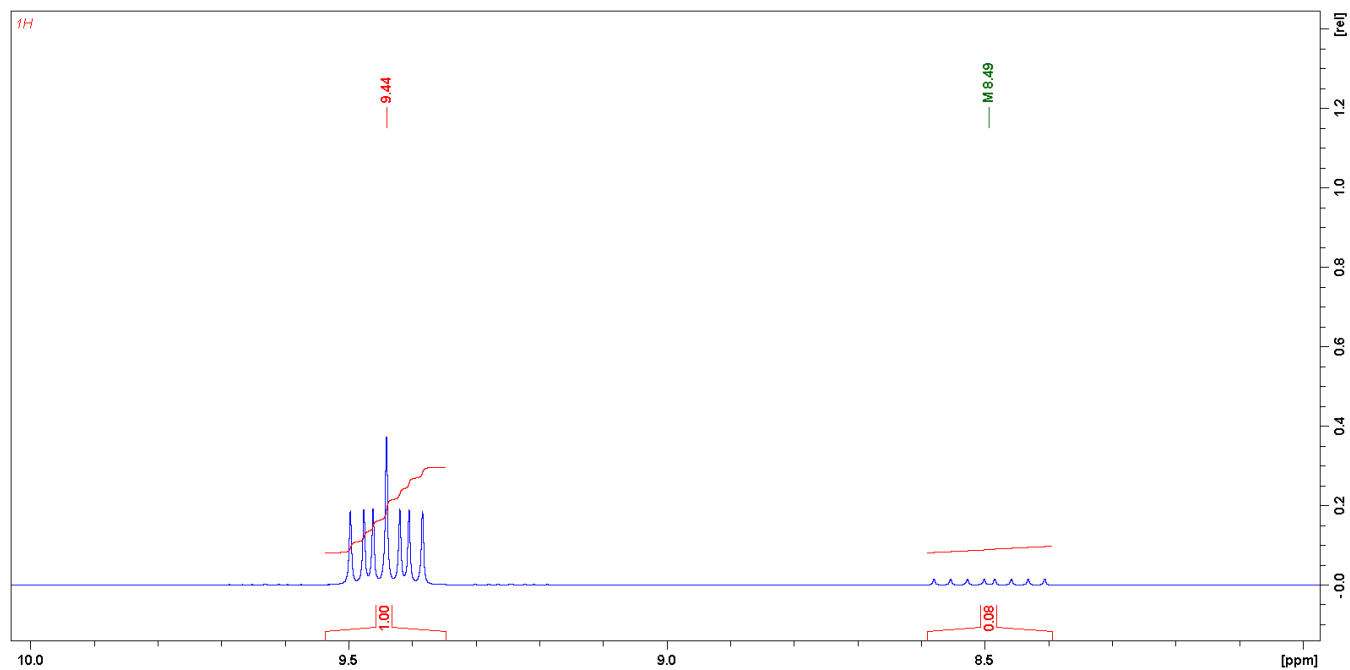

**Figure S32.**  $^1\text{H}$  NMR (400 MHz,  $\text{C}_6\text{D}_6$ , 298 K) spectrum of isolated  $\{\text{cyclo}-(\text{CH}_2)_4\text{CH}\}(\text{H})\text{C}=\text{P}-\text{PtBu}_2$  (**4b**) with aldehyde proton of *Z* isomer and with integration (ratio of isomers *E* : *Z* = 93 % : 7 %)

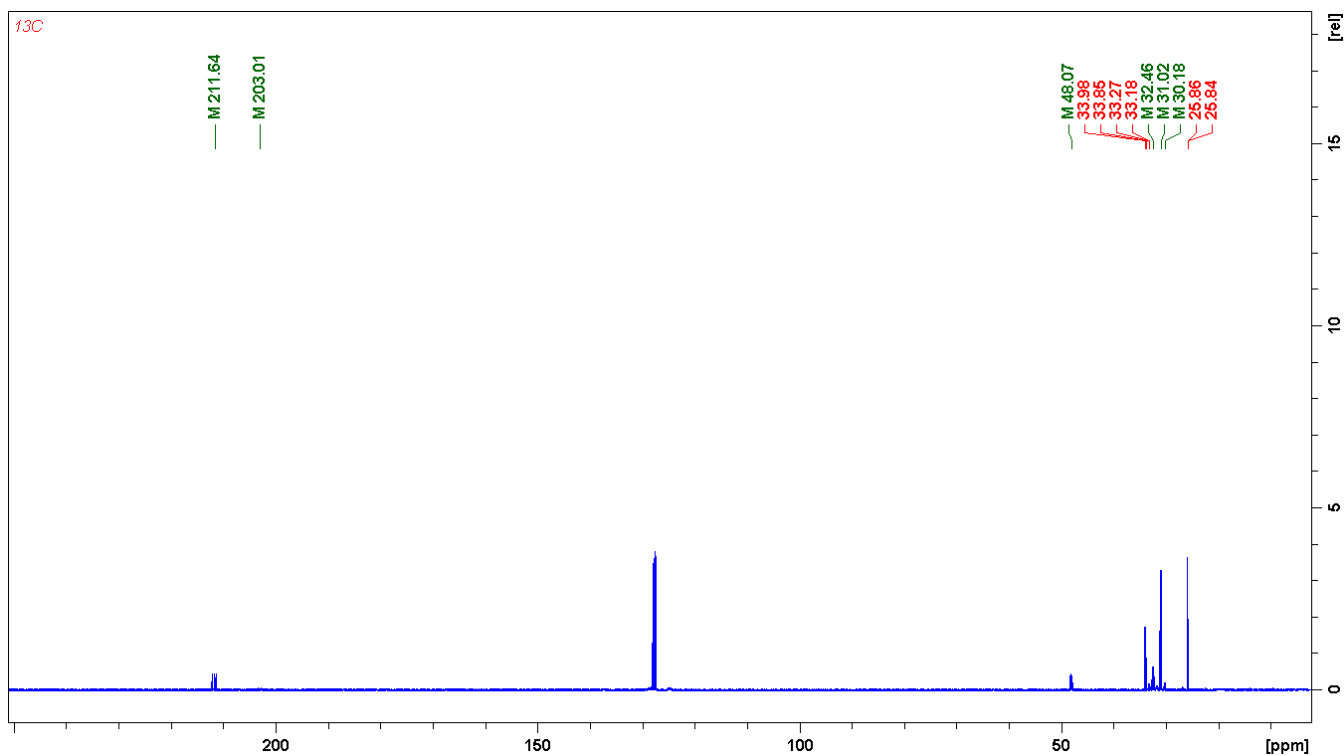

**Figure S33.**  $^{13}\text{C}\{^1\text{H}\}$  NMR (400 MHz,  $\text{C}_6\text{D}_6$ , 298 K) spectrum of isolated  $\{\text{cyclo}-(\text{CH}_2)_4\text{CH}\}(\text{H})\text{C}=\text{P}-\text{PtBu}_2$  (**4b**).

*E* isomer:

- 211.64 ppm, (dd),  $J_{\text{P-C}} = 48.2$  Hz,  $J_{\text{P-C}} = 34.6$  Hz,  $\{\text{cyclo}-(\text{CH}_2)_4\text{CH}\}(\text{H})\text{C}=\text{P}-\text{PtBu}_2 - E$  isomer;
- 48.07 ppm, (dd),  $J_{\text{P-C}} = 18.6$  Hz,  $J_{\text{P-C}} = 13.4$  Hz,  $\{\text{cyclo}-(\text{CH}_2)_4\text{CH}\}(\text{H})\text{C}=\text{P}-\text{PtBu}_2 - E$  isomer;
- 33.98 ppm, (s),  $\{\text{cyclo}-(\text{CH}_2)_4\text{CH}\}(\text{H})\text{C}=\text{P}-\text{PtBu}_2 - E$  isomer;
- 33.85 ppm, (s),  $\{\text{cyclo}-(\text{CH}_2)_4\text{CH}\}(\text{H})\text{C}=\text{P}-\text{PtBu}_2 - E$  isomer;
- 32.46 ppm, (dd),  $J_{\text{P-C}} = 28.2$  Hz,  $J_{\text{P-C}} = 2.8$  Hz,  $\{\text{cyclo}-(\text{CH}_2)_4\text{CH}\}(\text{H})\text{C}=\text{P}-\text{P}\{\text{C}(\text{CH}_3)_3\}_2 - E$  isomer;
- 31.02 ppm, (dd),  $J_{\text{P-C}} = 13.8$  Hz,  $J_{\text{P-C}} = 5.0$  Hz,  $\{\text{cyclo}-(\text{CH}_2)_4\text{CH}\}(\text{H})\text{C}=\text{P}-\text{P}\{\text{C}(\text{CH}_3)_3\}_2 - E$  isomer;
- 25.86 ppm, (s),  $\{\text{cyclo}-(\text{CH}_2)_4\text{CH}\}(\text{H})\text{C}=\text{P}-\text{PtBu}_2 - E$  isomer;
- 25.84 ppm, (s),  $\{\text{cyclo}-(\text{CH}_2)_4\text{CH}\}(\text{H})\text{C}=\text{P}-\text{PtBu}_2 - E$  isomer;

*Z* isomer: only few signals are visible

- 203.01 ppm, (dd),  $J_{\text{P-C}} = 55.7$  Hz,  $J_{\text{P-C}} = 14.2$  Hz,  $\{\text{cyclo}-(\text{CH}_2)_4\text{CH}\}(\text{H})\text{C}=\text{P}-\text{PtBu}_2 - Z$  isomer;
- 33.27 ppm, (s),  $\{\text{cyclo}-(\text{CH}_2)_4\text{CH}\}(\text{H})\text{C}=\text{P}-\text{PtBu}_2 - Z$  isomer;
- 33.18 ppm, (s),  $\{\text{cyclo}-(\text{CH}_2)_4\text{CH}\}(\text{H})\text{C}=\text{P}-\text{PtBu}_2 - Z$  isomer;
- 30.18 ppm, (dd),  $J_{\text{P-C}} = 14.8$  Hz,  $J_{\text{P-C}} = 5.42$  Hz,  $\{\text{cyclo}-(\text{CH}_2)_4\text{CH}\}(\text{H})\text{C}=\text{P}-\text{P}\{\text{C}(\text{CH}_3)_3\}_2 - Z$  isomer;

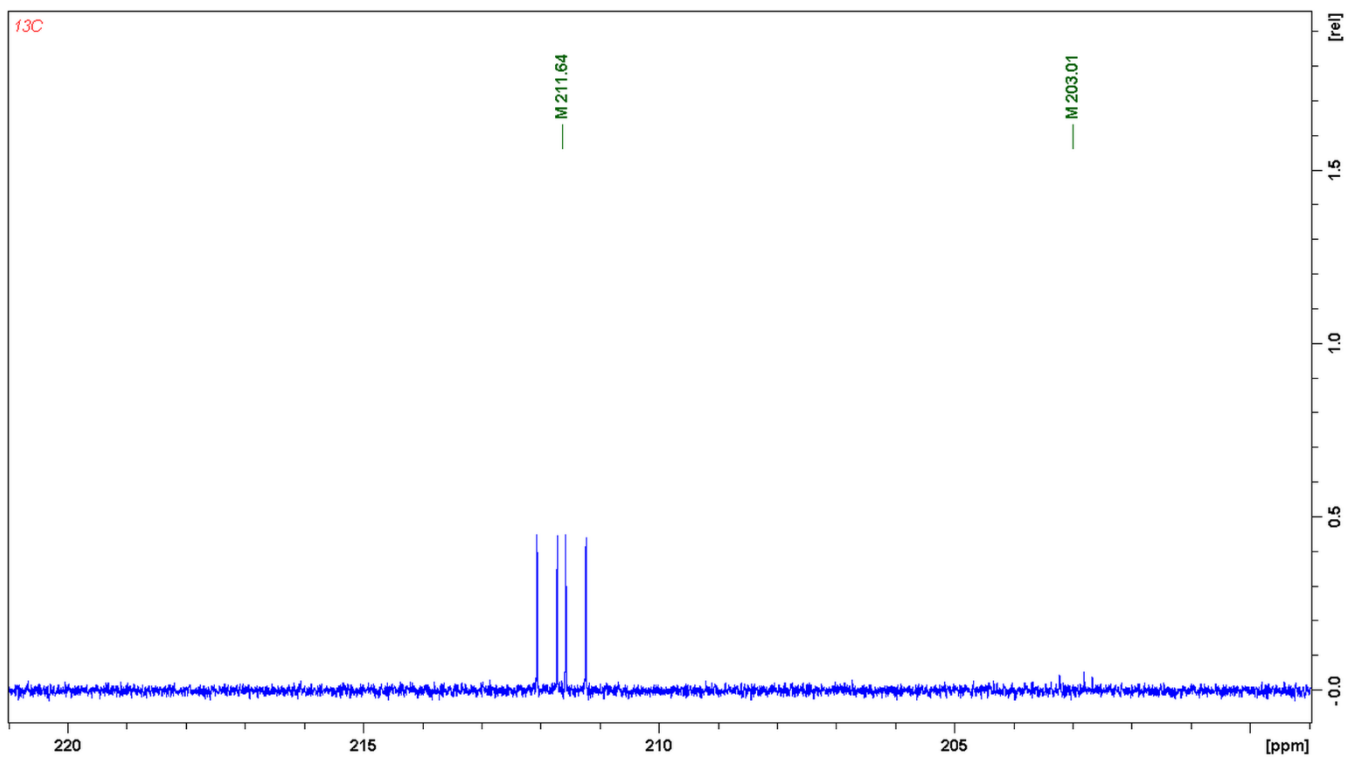

**Figure S34.**  $^{13}\text{C}\{^1\text{H}\}$  NMR (400 MHz,  $\text{C}_6\text{D}_6$ , 298 K) spectrum of isolated  $\{\text{cyclo}-(\text{CH}_2)_4\text{CH}\}(\text{H})\text{C}=\text{P}-\text{PtBu}_2$  (**4b**) in the range of 220 ppm to 200 ppm.

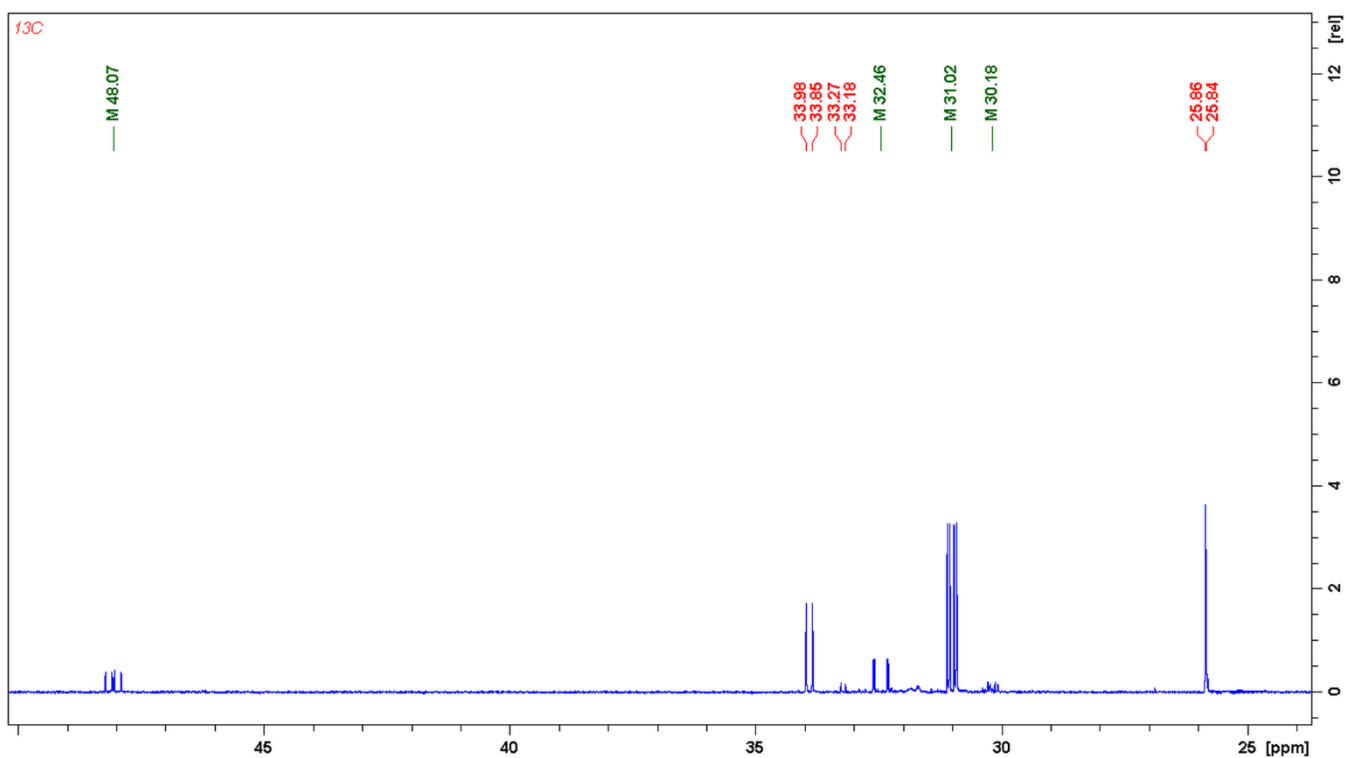

**Figure S35.**  $^{13}\text{C}\{^1\text{H}\}$  NMR (400 MHz,  $\text{C}_6\text{D}_6$ , 298 K) spectrum of isolated  $\{\text{cyclo}-(\text{CH}_2)_4\text{CH}\}(\text{H})\text{C}=\text{P}-\text{PtBu}_2$  (**4b**) in the range of 50 ppm to 25 ppm.

### B.1.13. *p*-Tolualdehyde

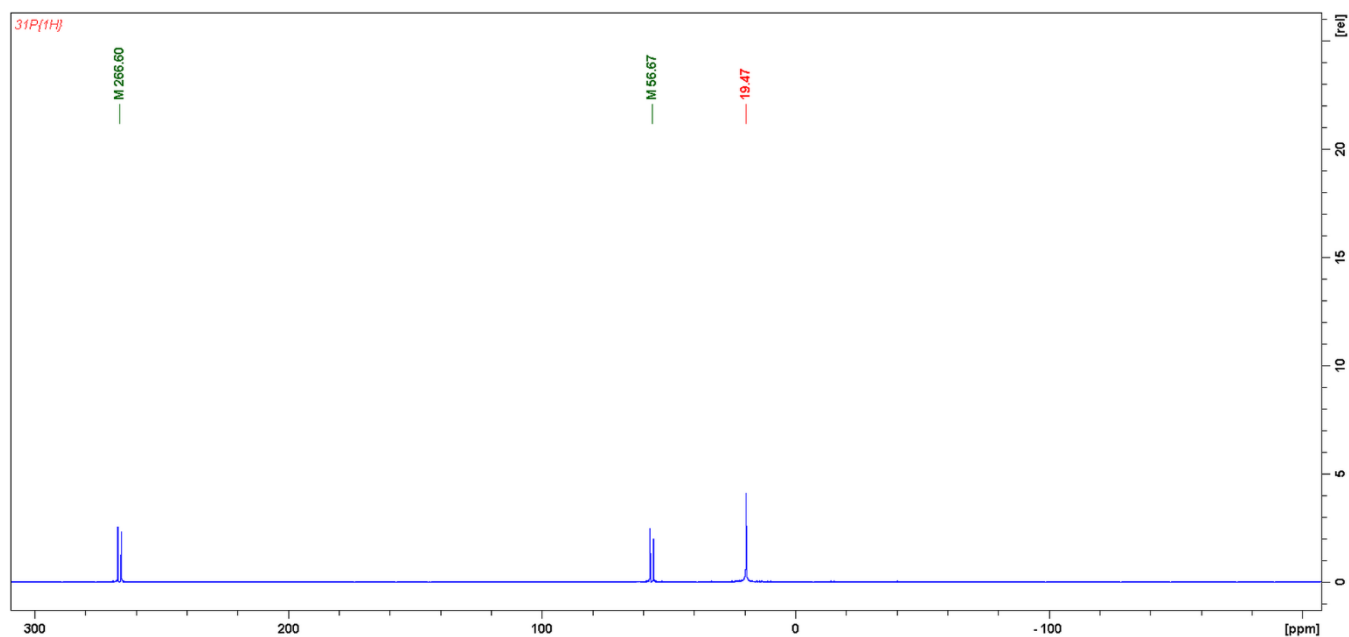

**Figure S36.**  $^{31}\text{P}\{^1\text{H}\}$  NMR (400 MHz,  $\text{C}_6\text{D}_6$ , 298 K) spectrum of the reaction mixture conducted 24 hours after starting the reaction of **1** with *p*-Tolualdehyde.

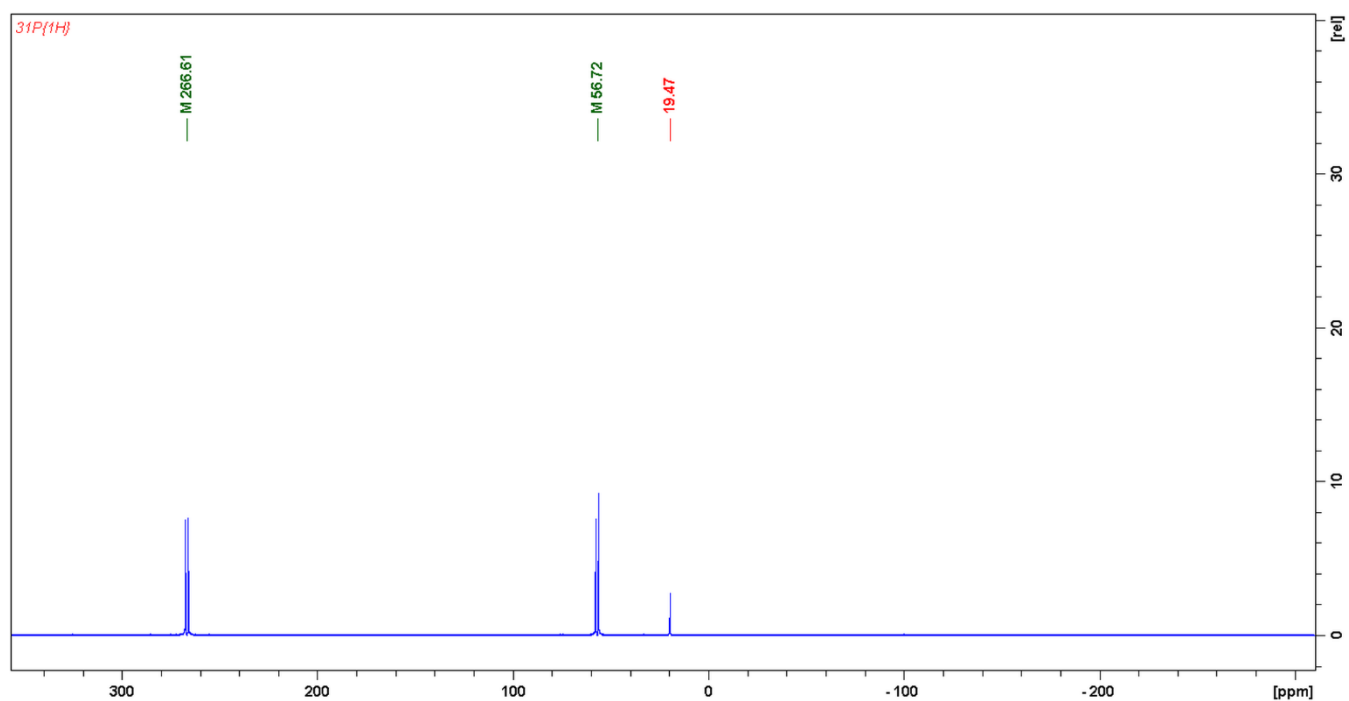

**Figure S37.**  $^{31}\text{P}\{^1\text{H}\}$  NMR (400 MHz,  $\text{C}_6\text{D}_6$ , 298 K) spectrum of isolated (*p*-Me-Ph)(H)C=P-*Pt*Bu<sub>2</sub> (**4c**).

Visible only one *E* isomer:

- 266.61 ppm, (d),  $J_{\text{P-P}} = 220.8$  Hz, (*p*-Me-Ph)(H)C=P-*Pt*Bu<sub>2</sub>;
- 56.72 ppm, (d),  $J_{\text{P-P}} = 220.8$  Hz, (*p*-Me-Ph)(H)C=P-*Pt*Bu<sub>2</sub>;

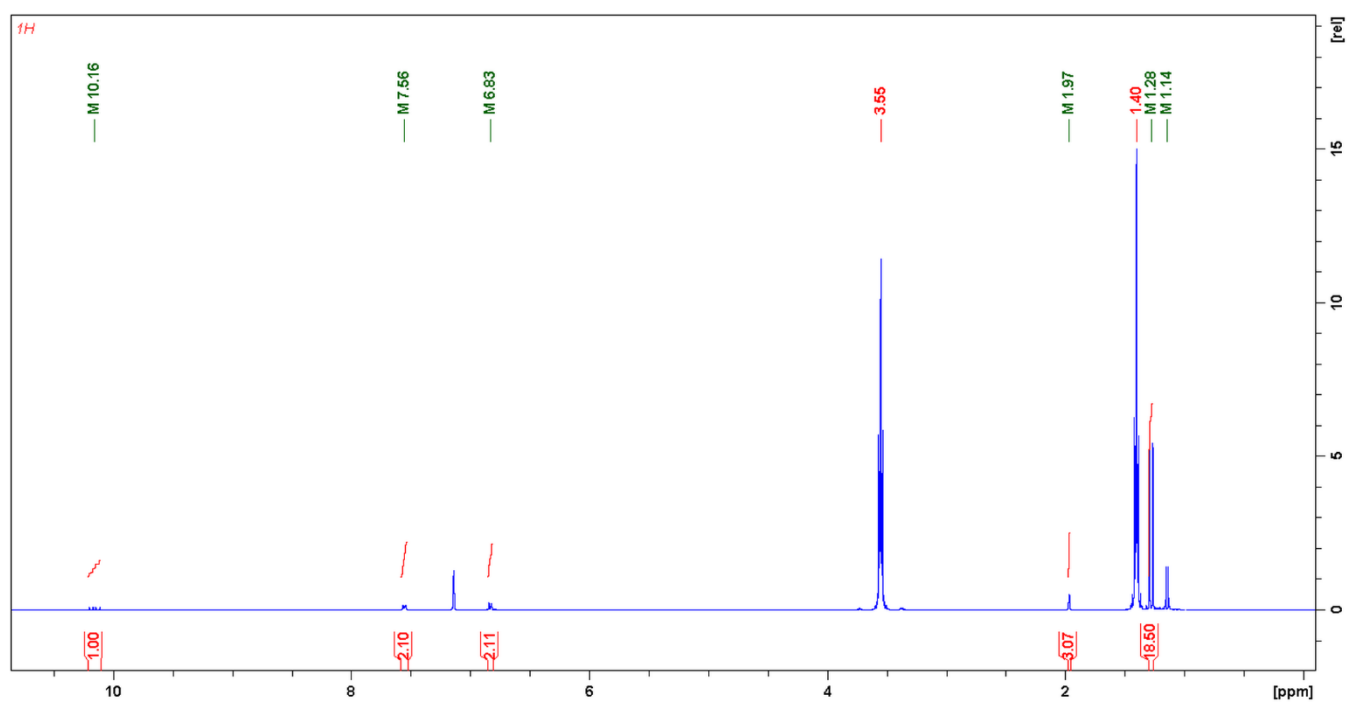

**Figure S38.**  $^1\text{H}$  NMR (400 MHz,  $\text{C}_6\text{D}_6$ , 298 K) spectrum of isolated  $(p\text{-Me-Ph})(\text{H})\text{C}=\text{P-PtBu}_2$  (**4c**).

Visible only one *E* isomer:

- 10.16 ppm, (dd), 1H,  $J_{\text{P-H}} = 22.7$  Hz,  $J_{\text{P-H}} = 13.6$  Hz ( $p\text{-Me-Ph})(\text{H})\text{C}=\text{P-PtBu}_2$ ;
- 7.56 ppm, (dd),  $J_{\text{P-H}} = 7.6$  Hz,  $J_{\text{P-H}} = 2.7$  Hz ( $p\text{-Me-Ph})(\text{H})\text{C}=\text{P-PtBu}_2$  (*o*- $\text{H}_{\text{Ar}}$ );
- 6.83 ppm, (d),  $J_{\text{P-H}} = 7.9$  Hz, ( $p\text{-Me-Ph})(\text{H})\text{C}=\text{P-PtBu}_2$  (*m*- $\text{H}_{\text{Ar}}$ );
- 1.97 ppm, (d),  $J_{\text{P-H}} = 1.9$  Hz, ( $p\text{-Me-Ph})(\text{H})\text{C}=\text{P-PtBu}_2$ ;
- 1.28 ppm, (d),  $J_{\text{P-H}} = 11.1$  Hz, ( $p\text{-Me-Ph})(\text{H})\text{C}=\text{P-PtBu}_2$ ;

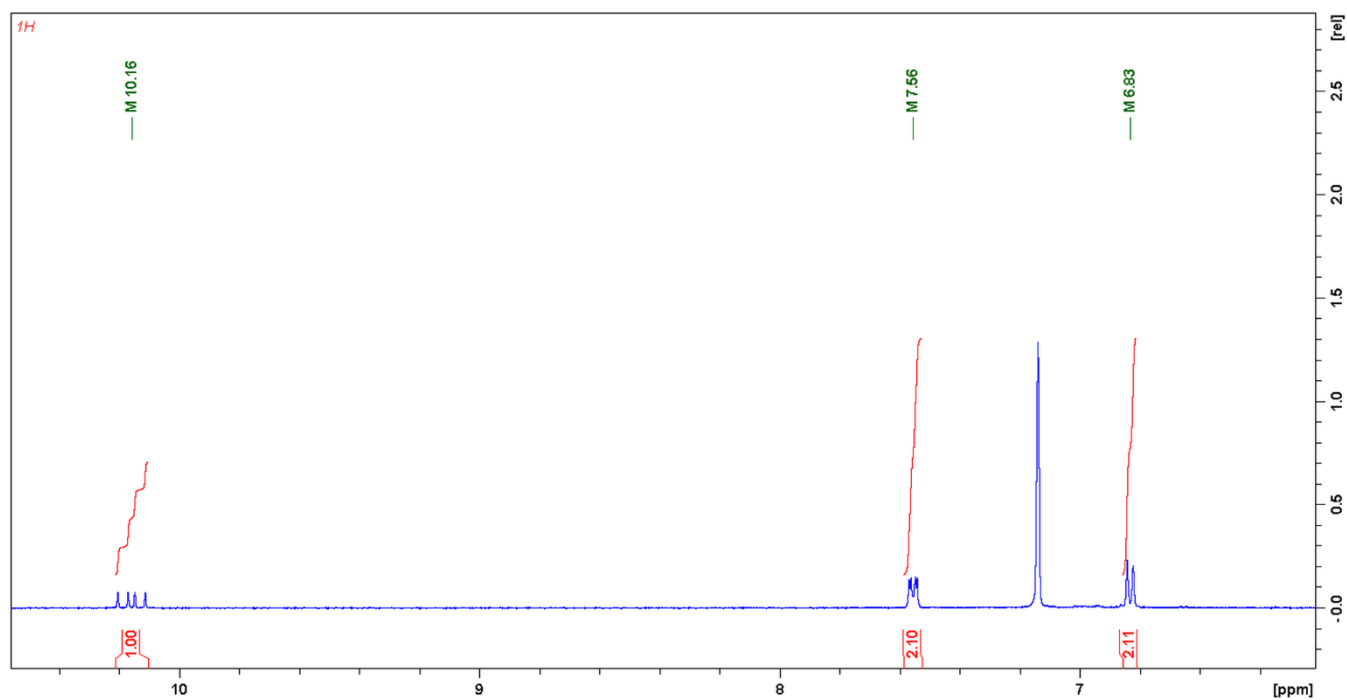

**Figure S39.**  $^1\text{H}$  NMR (400 MHz,  $\text{C}_6\text{D}_6$ , 298 K) spectrum of isolated (*p*-Me-Ph)(H)C=P-*Pt*Bu<sub>2</sub> (**4c**) in the range from 10.5 ppm to 6 ppm.

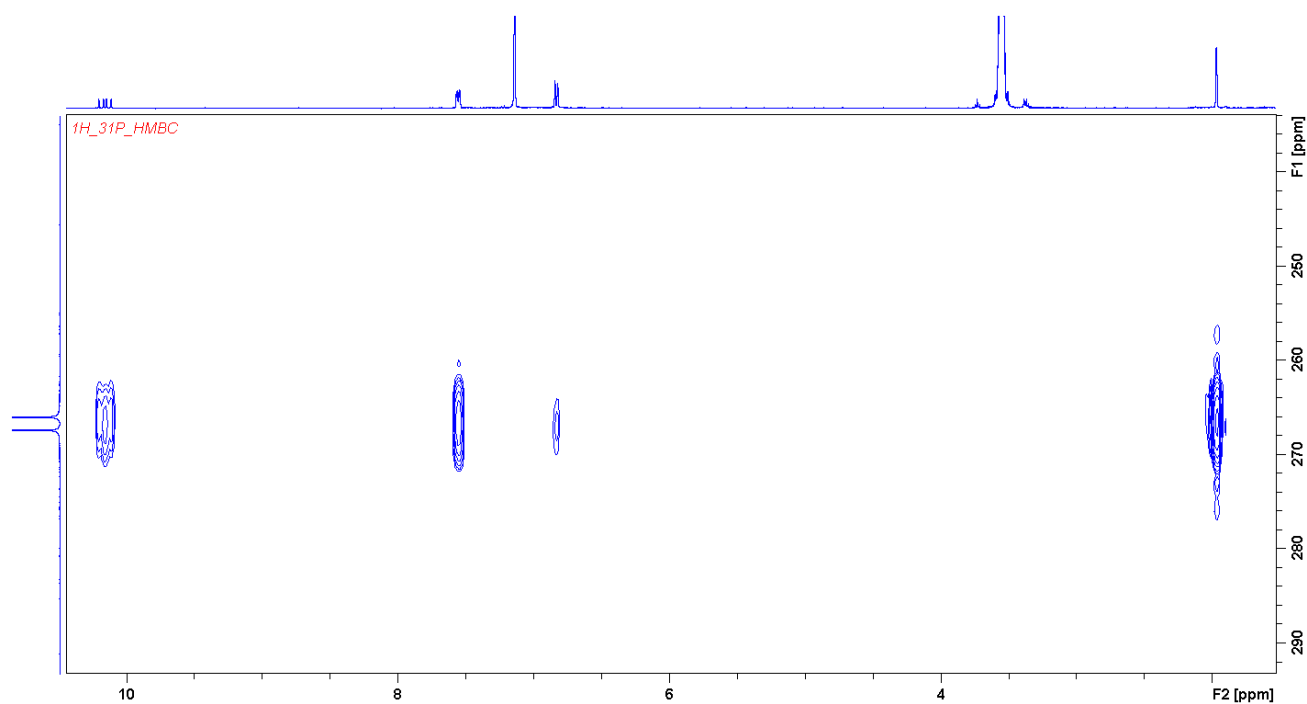

**Figure S40.**  $^{31}\text{P}\{^1\text{H}\}/^1\text{H}$ -HMBC (400 MHz,  $\text{C}_6\text{D}_6$ , 298 K) spectrum of isolated (*p*-Me-Ph)(H)C=P-*Pt*Bu<sub>2</sub> (**4c**).

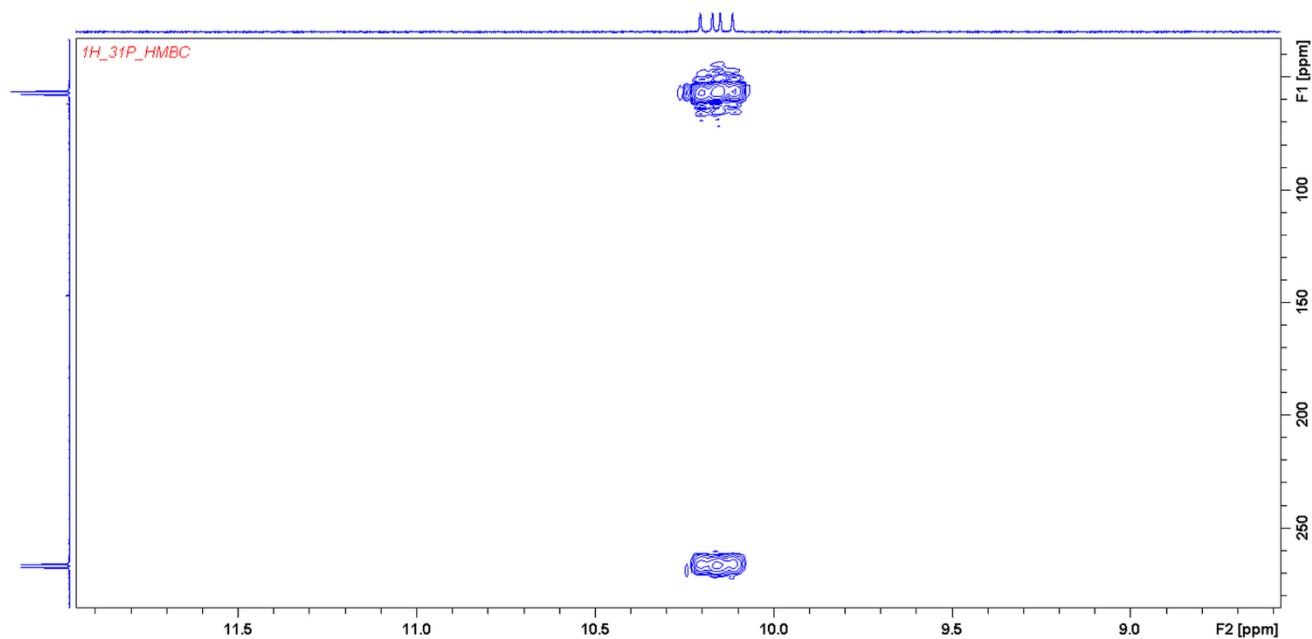

**Figure S41.**  $^{31}\text{P}\{^1\text{H}\}/^1\text{H}$ -HMBC (400 MHz,  $\text{C}_6\text{D}_6$ , 298 K) spectrum of isolated (*p*-Me-Ph)(H)C=P-*Pt*Bu<sub>2</sub> (**4c**).



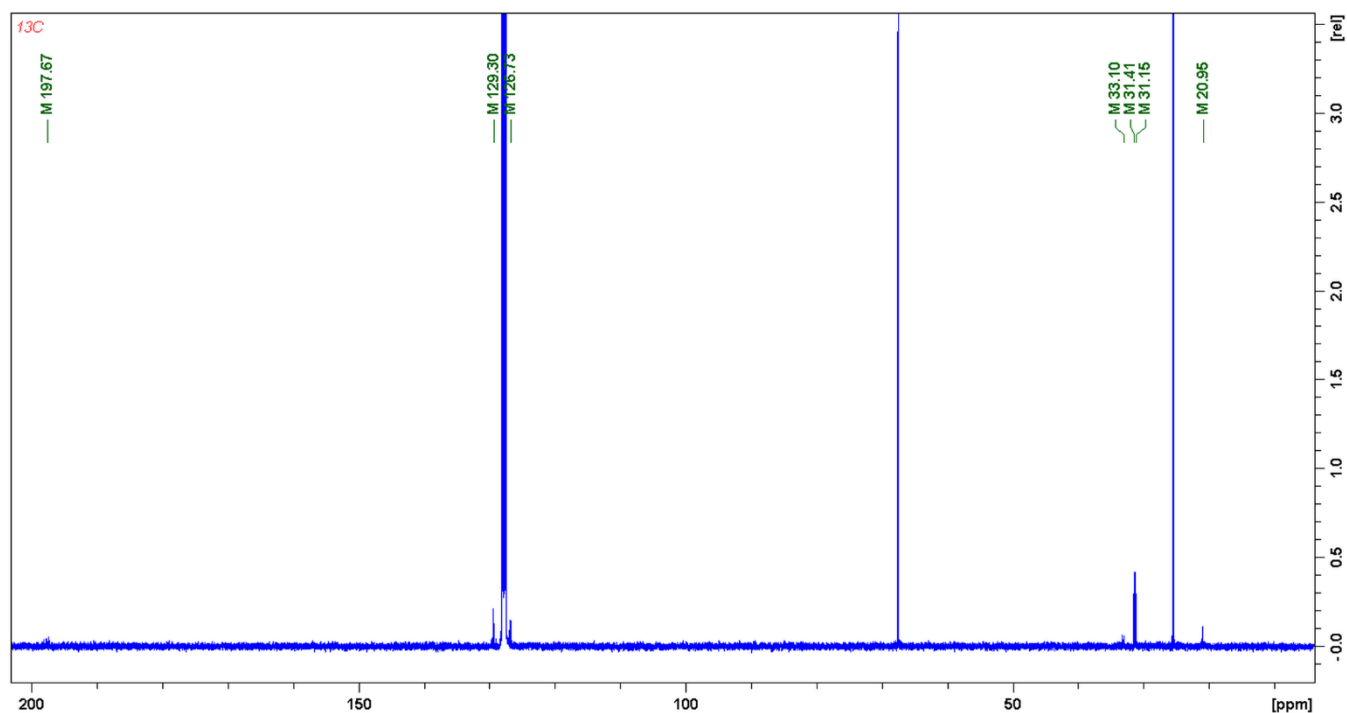

**Figure S42.**  $^{13}\text{C}\{^1\text{H}\}$  NMR (400 MHz,  $\text{C}_6\text{D}_6$ , 298 K) spectrum of isolated (*p*-Me-Ph)(H)C=P-PtBu<sub>2</sub> (**4c**).

Visible only *E* isomer:

- 197.67 ppm, (dd),  $J_{\text{P-C}} = 45.1$  Hz,  $J_{\text{P-C}} = 39.2$  Hz, (*p*-Me-Ph)(H)C=P-PtBu<sub>2</sub>;
- 129.30 ppm, (d),  $J_{\text{P-C}} = 2.6$  Hz, (*p*-Me-Ph)(H)C=P-PtBu<sub>2</sub> (*m*-C<sub>Ar</sub>);
- 126.73 ppm, (d),  $J_{\text{P-C}} = 19.5$  Hz, (*p*-Me-Ph)(H)C=P-PtBu<sub>2</sub> (*o*-C<sub>Ar</sub>);
- 33.10 ppm, (dd),  $J_{\text{P-C}} = 27.7$  Hz,  $J_{\text{P-C}} = 2.5$  Hz, (*p*-Me-Ph)(H)C=P-P{C(CH<sub>3</sub>)<sub>3</sub>}<sub>2</sub>;
- 31.15 ppm, (dd),  $J_{\text{P-C}} = 13.8$  Hz,  $J_{\text{P-C}} = 5.1$  Hz, (*p*-Me-Ph)(H)C=P-P{C(CH<sub>3</sub>)<sub>3</sub>}<sub>2</sub>;
- 20.95 ppm, (d),  $J_{\text{P-C}} = 1.0$  Hz, (*p*-Me-Ph)(H)C=P-PtBu<sub>2</sub>;

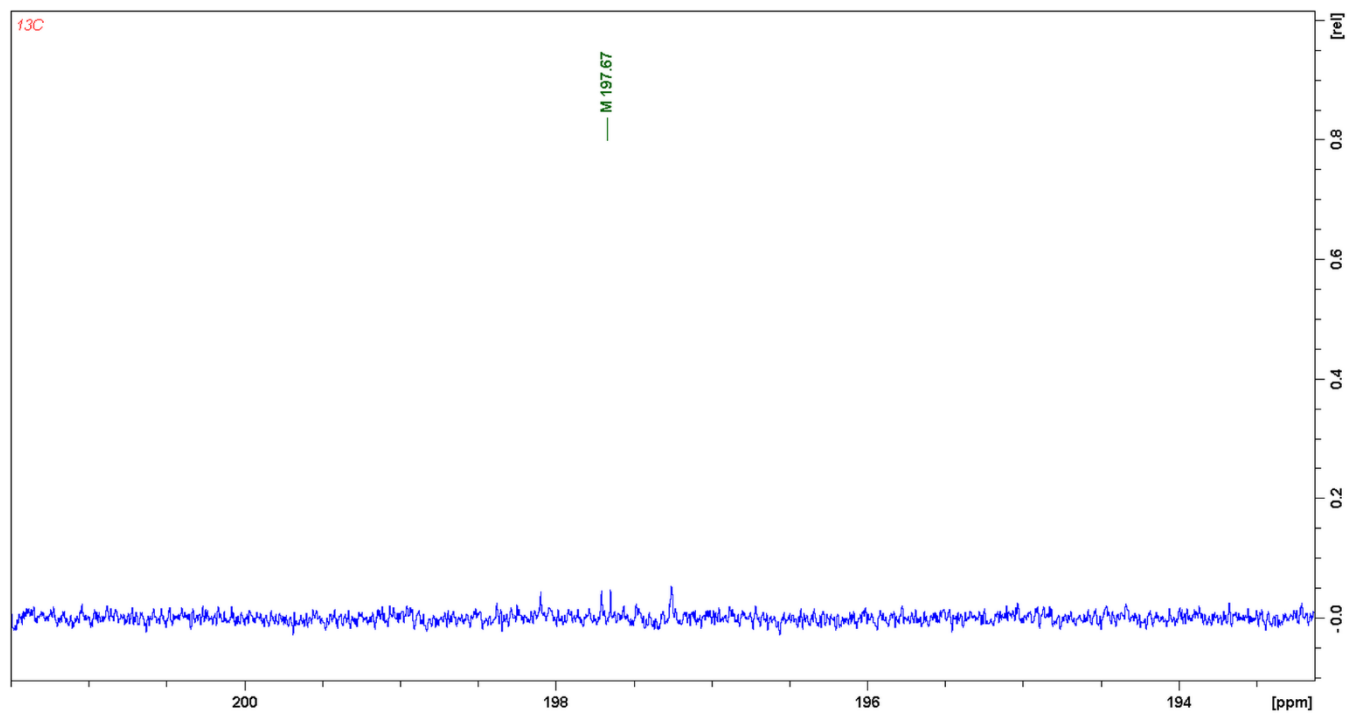

**Figure S43.**  $^{13}\text{C}\{^1\text{H}\}$  NMR (400 MHz,  $\text{C}_6\text{D}_6$ , 298 K) spectrum of isolated (*p*-Me-Ph)(H)C=P-*t*Bu<sub>2</sub> (**4c**) in the range from 202 ppm to 192 ppm.

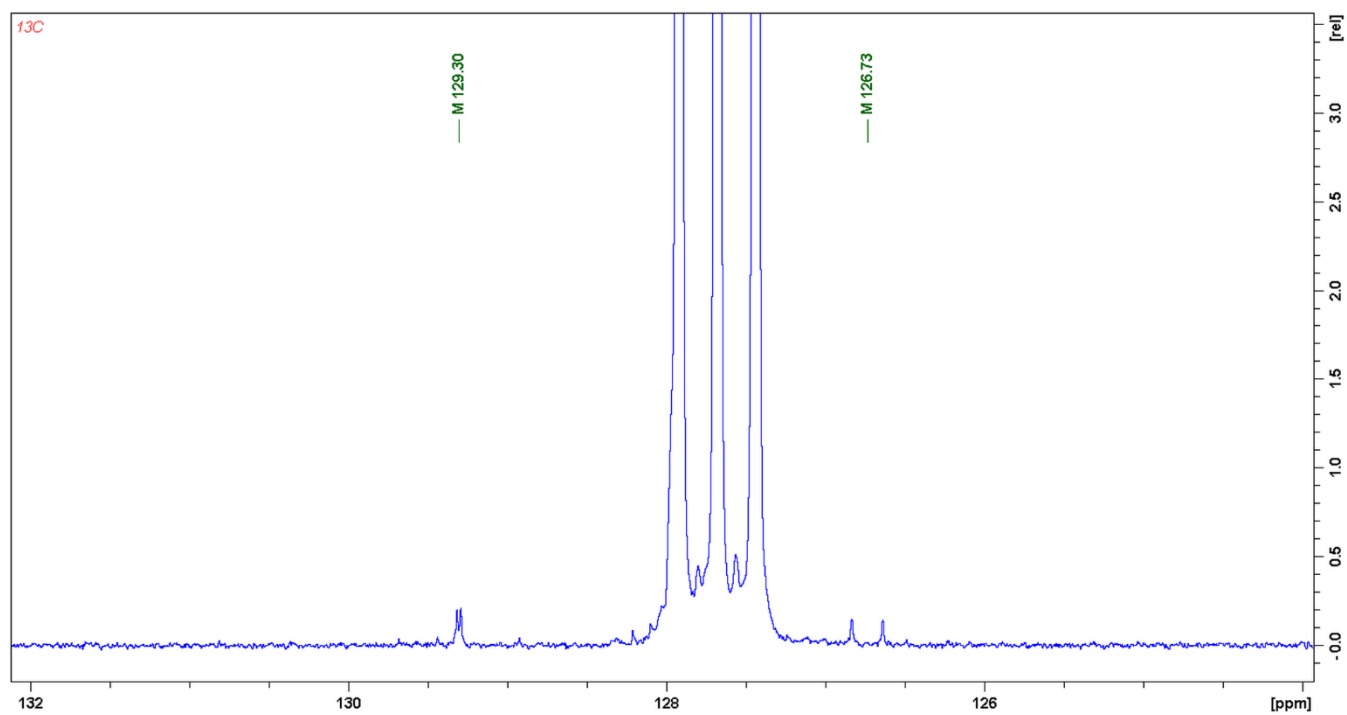

**Figure S44.**  $^{13}\text{C}\{^1\text{H}\}$  NMR (400 MHz,  $\text{C}_6\text{D}_6$ , 298 K) spectrum of isolated (*p*-Me-Ph)(H)C=P-*t*Bu<sub>2</sub> (**4c**) in the range from 132 ppm to 124 ppm.

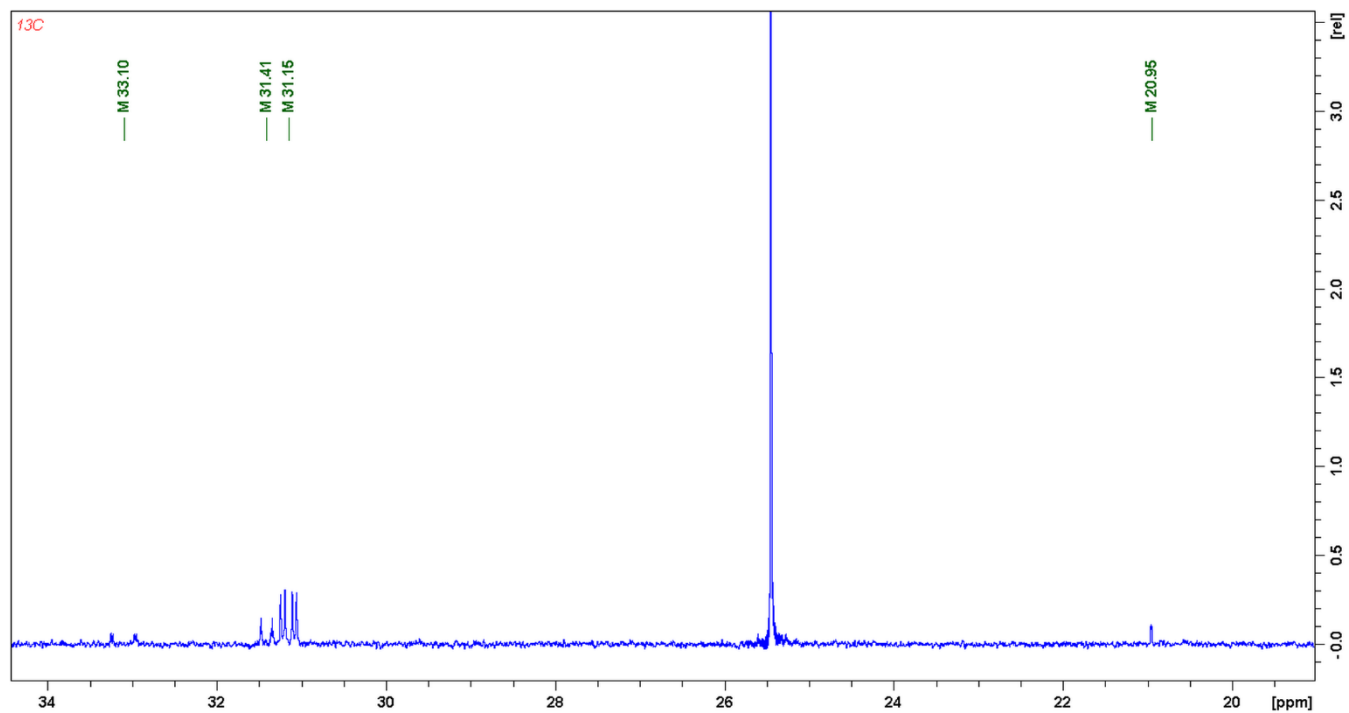

**Figure S45.**  $^{13}\text{C}\{^1\text{H}\}$  NMR (400 MHz,  $\text{C}_6\text{D}_6$ , 298 K) spectrum of isolated  $(p\text{-Me-Ph})(\text{H})\text{C}=\text{P-P}t\text{Bu}_2$  (**4c**) in the range from 34 ppm to 20 ppm.

### B.1.14. 4-(dimethylamino)benzaldehyde

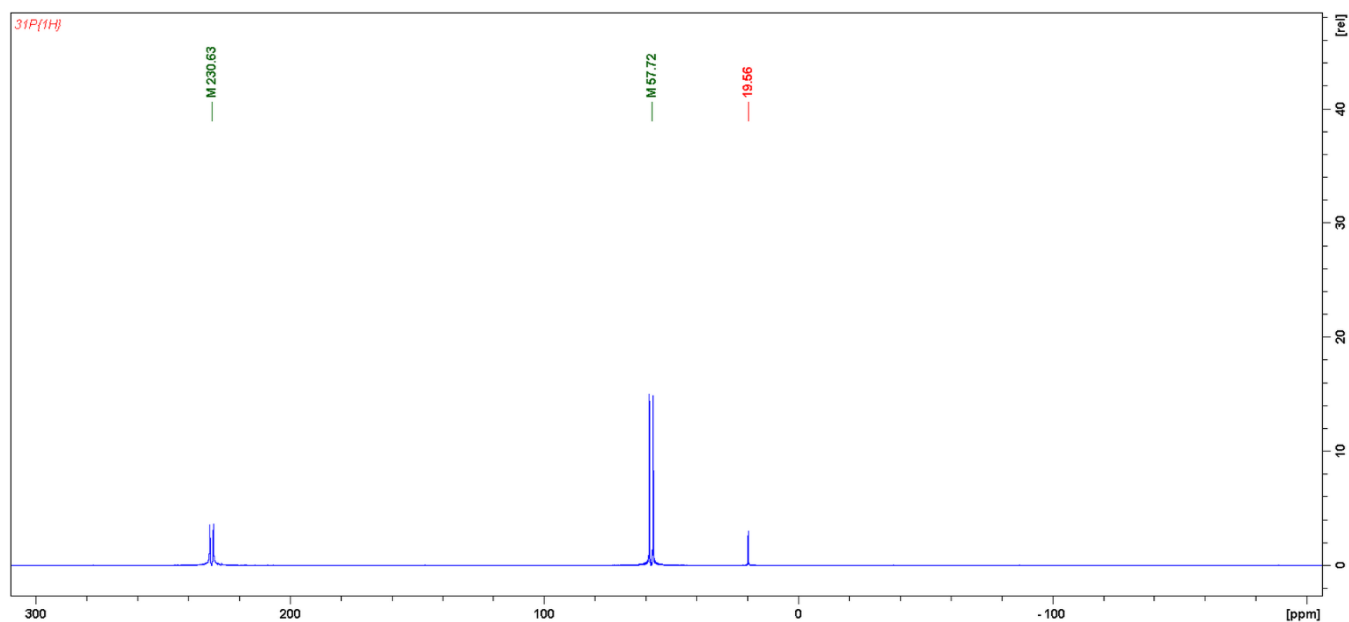

**Figure S46.**  $^{31}\text{P}\{^1\text{H}\}$  NMR (400 MHz,  $\text{C}_6\text{D}_6$ , 298 K) spectrum of the reaction mixture conducted 24 hours after starting the reaction of **1** with 4-(dimethylamino)benzaldehyde.

- 230.63 ppm, (d),  $J_{\text{P-P}} = 224.9$  Hz,  $\{4-(\text{Me})_2\text{N-Ph}\}(\text{H})\text{C}=\text{P-P}t\text{Bu}_2 - E$  isomer;
- 57.72 ppm, (d),  $J_{\text{P-P}} = 224.9$  Hz,  $\{4-(\text{Me})_2\text{N-Ph}\}(\text{H})\text{C}=\text{P-P}t\text{Bu}_2 - E$  isomer;
- 19.56 ppm, (s),  $t\text{Bu}_2\text{PH}$ ;

### B.1.15. Biphenyl-4-carboxaldehyde

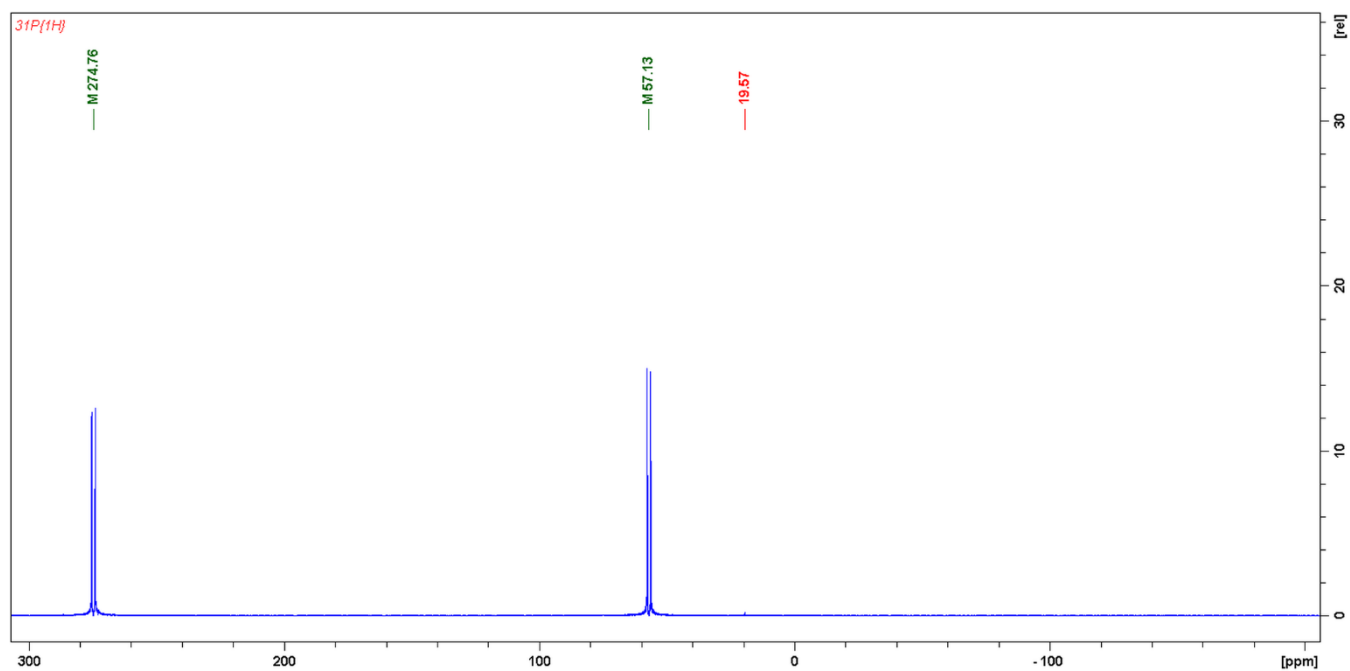

**Figure S47.**  $^{31}\text{P}\{^1\text{H}\}$  NMR (400 MHz,  $\text{C}_6\text{D}_6$ , 298 K) spectrum of reaction mixture conducted 24 hours after starting the reaction of **1** with biphenyl-4-carboxaldehyde.

- 274.76 ppm, (d),  $J_{\text{P-P}} = 224.9$  Hz,  $\text{PhPh(H)C}=\text{P-P}t\text{Bu}_2$ ;
- 57.13 ppm, (d),  $J_{\text{P-P}} = 224.9$  Hz,  $\text{PhPh(H)C}=\text{P-P}t\text{Bu}_2$ ;
- 19.57 ppm, (s),  $t\text{Bu}_2\text{PH}$ ;

## B.2. Phospha-Peterson reaction of *t*Bu<sub>2</sub>P-P(SiMe<sub>3</sub>)Li·3THF (**2**) with selected ketones and aldehydes

### B.2.1. Benzophenone

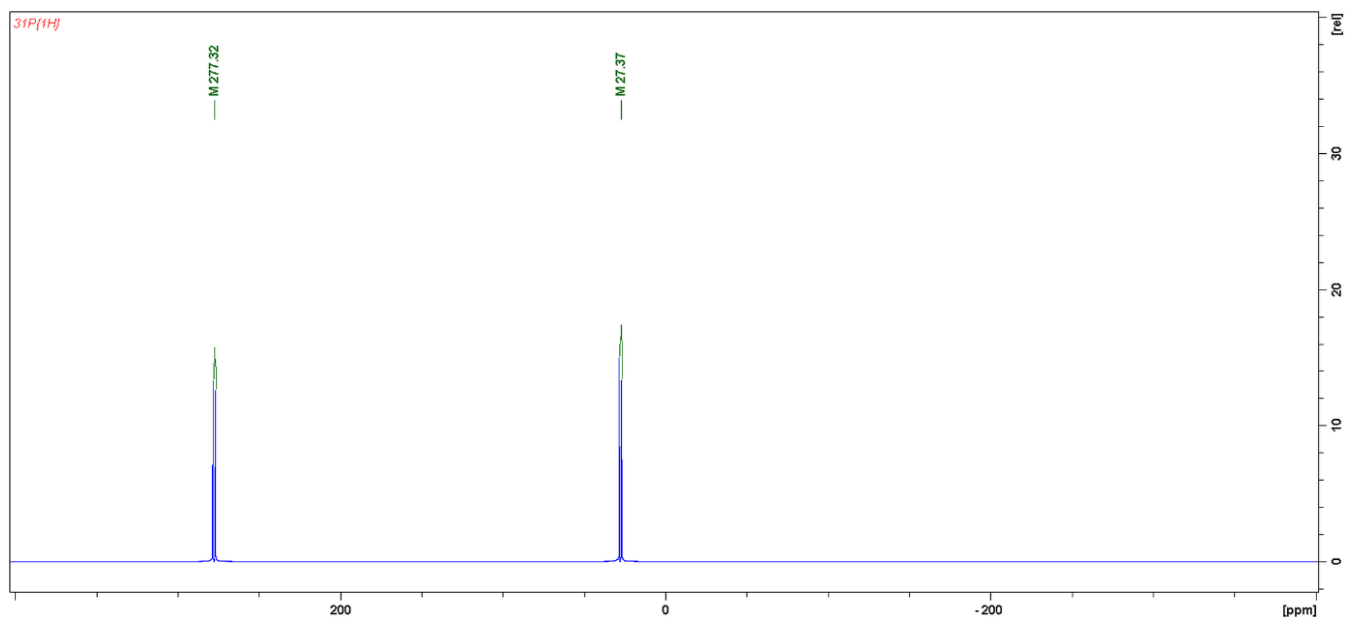

**Figure S48.** <sup>31</sup>P{<sup>1</sup>H} NMR (400 MHz, C<sub>6</sub>D<sub>6</sub>, 298 K) spectrum of isolated (Ph)<sub>2</sub>C=P-P*t*Bu<sub>2</sub> (**3a**).

- 277.32 ppm, (d),  $J_{P-P} = 228.9$  Hz, (Ph)<sub>2</sub>C=P-P*t*Bu<sub>2</sub>;
- 27.37 ppm, (d),  $J_{P-P} = 228.9$  Hz, (Ph)<sub>2</sub>C=P-P*t*Bu<sub>2</sub>;

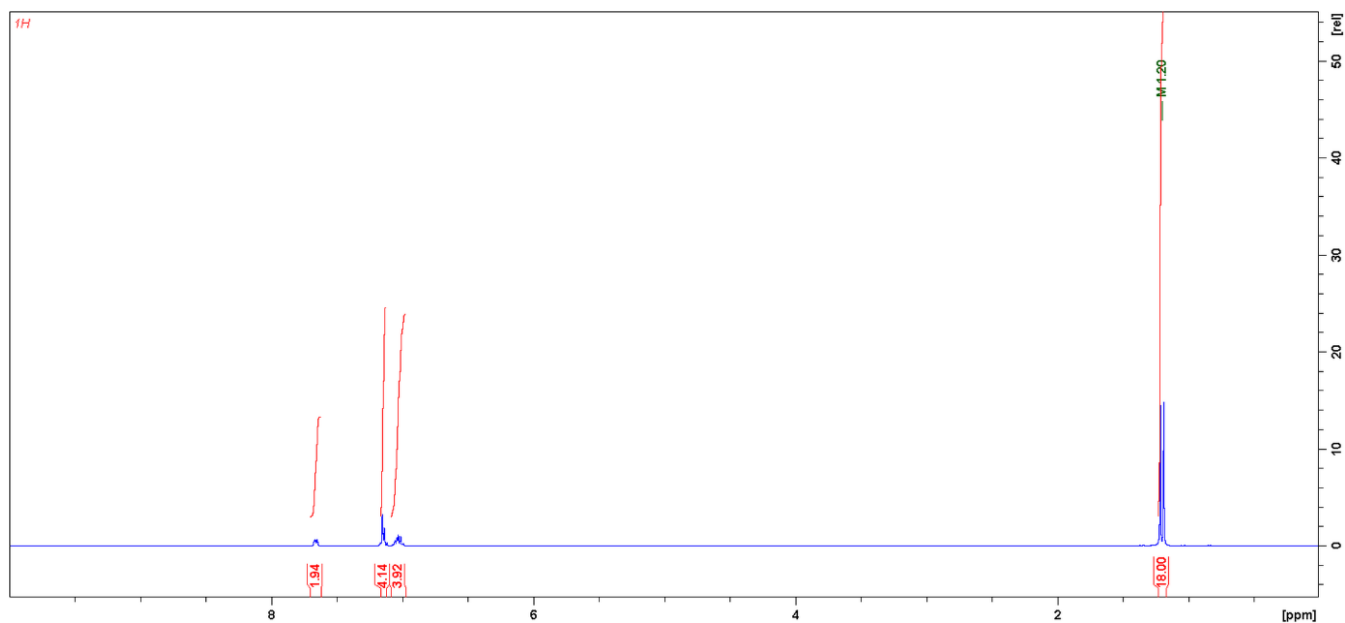

**Figure S49.** <sup>1</sup>H NMR (400 MHz, C<sub>6</sub>D<sub>6</sub>, 298 K) spectrum of isolated (Ph)<sub>2</sub>C=P-P*t*Bu<sub>2</sub> (**3a**).

- 7.70 ppm – 7.00 ppm, 10H, (Ph)<sub>2</sub>C=P-P*t*Bu<sub>2</sub>;
- 1.20 ppm, (d),  $J_{P-H} = 10.9$  Hz, 18H, (Ph)<sub>2</sub>C=P-P*t*Bu<sub>2</sub>;

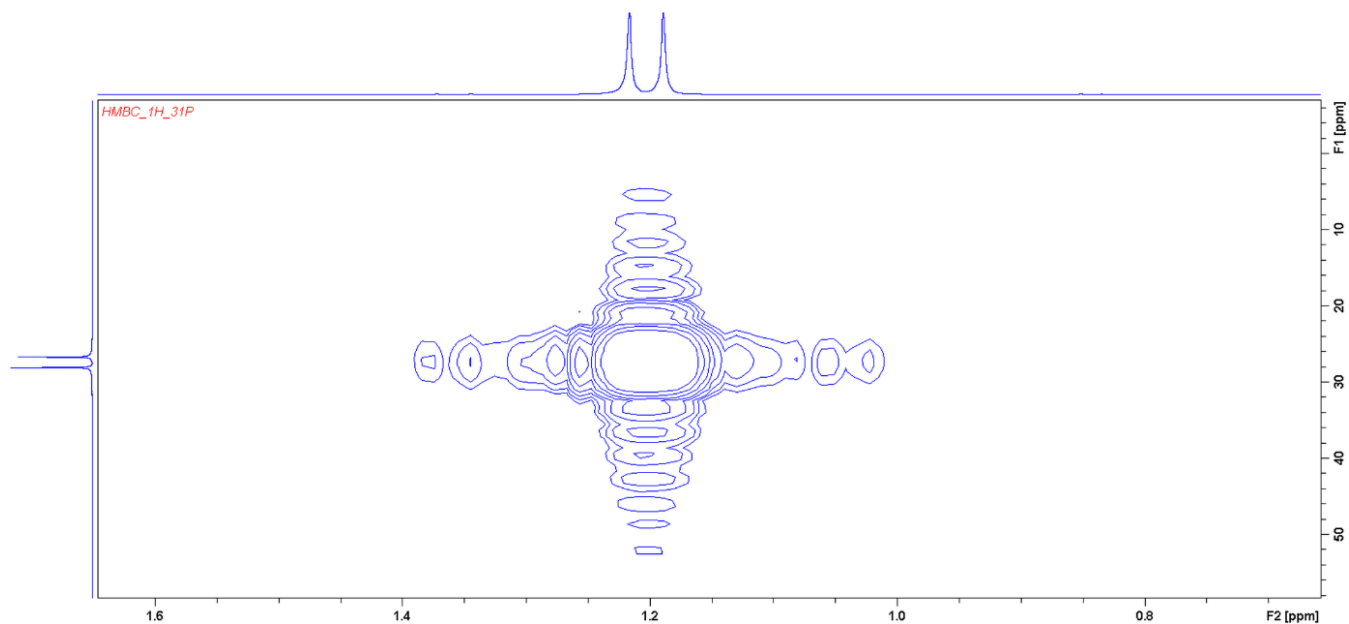

**Figure S50.**  $^{31}\text{P}\{^1\text{H}\}/^1\text{H}$ -HMBC (400 MHz,  $\text{C}_6\text{D}_6$ , 298 K) spectrum of isolated  $(\text{Ph})_2\text{C}=\text{P}-\text{P}t\text{Bu}_2$  (**3a**) (correlation of *tert*-butyl groups).

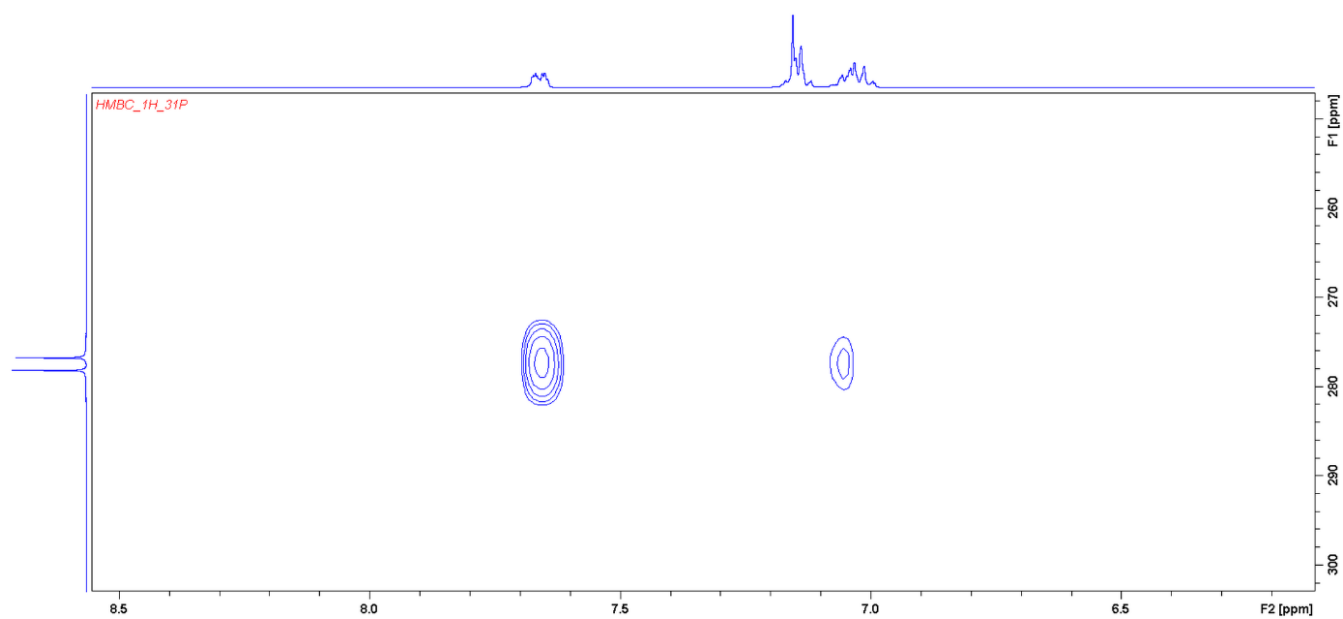

**Figure S51.**  $^{31}\text{P}\{^1\text{H}\}/^1\text{H}$ -HMBC (400 MHz,  $\text{C}_6\text{D}_6$ , 298 K) spectrum of isolated  $(\text{Ph})_2\text{C}=\text{P}-\text{P}t\text{Bu}_2$  (**3a**) (correlation of aromatic protons).

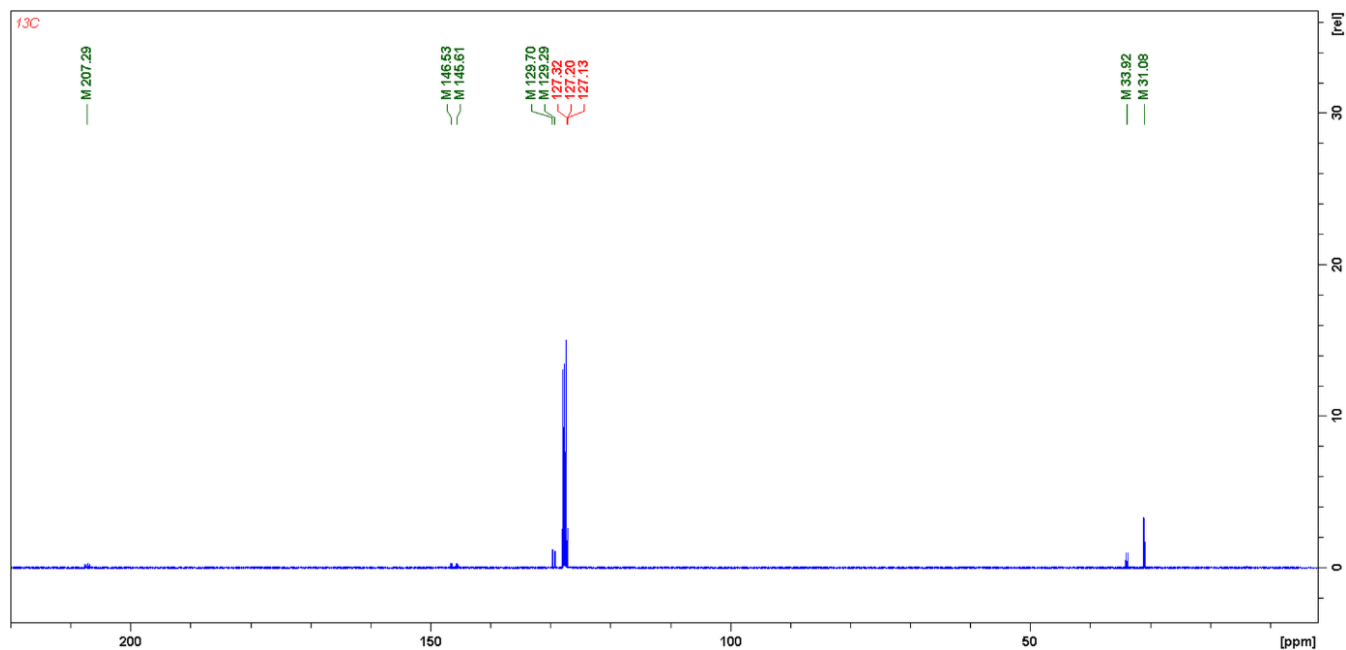

**Figure S52.**  $^{13}\text{C}\{^1\text{H}\}$  NMR (400 MHz,  $\text{C}_6\text{D}_6$ , 298 K) spectrum of isolated  $(\text{Ph})_2\text{C}=\text{P}-\text{PtBu}_2$  (**3a**).

- 207.29 ppm, (dd),  $J_{\text{P-C}} = 54.5$  Hz,  $J_{\text{P-C}} = 16.8$  Hz,  $(\text{Ph})_2\text{C}=\text{P}-\text{PtBu}_2$ ;
- 146.53 ppm, (dd),  $J_{\text{P-C}} = 23.2$  Hz,  $J_{\text{P-C}} = 4.3$  Hz,  $(\text{Ph})_2\text{C}=\text{P}-\text{PtBu}_2$  (*i*- $\text{C}_{\text{Ar}}$ );
- 145.61 ppm, (dd),  $J_{\text{P-C}} = 13.9$  Hz,  $J_{\text{P-C}} = 5.9$  Hz,  $(\text{Ph})_2\text{C}=\text{P}-\text{PtBu}_2$  (*i*- $\text{C}_{\text{Ar}}$ );
- 129.70 ppm, (dd),  $J_{\text{P-C}} = 10.6$  Hz,  $J_{\text{P-C}} = 6.5$  Hz,  $(\text{Ph})_2\text{C}=\text{P}-\text{PtBu}_2$  (*o*- $\text{C}_{\text{Ar}}$ );
- 129.29 ppm, (d),  $J_{\text{P-C}} = 4.8$  Hz,  $(\text{Ph})_2\text{C}=\text{P}-\text{PtBu}_2$  (*o*- $\text{C}_{\text{Ar}}$ );
- 128.04 ppm, (d),  $J_{\text{P-C}} = 1.1$  Hz,  $(\text{Ph})_2\text{C}=\text{P}-\text{PtBu}_2$  (*p*- $\text{C}_{\text{Ar}}$ );
- 127.32 ppm, (s),  $(\text{Ph})_2\text{C}=\text{P}-\text{PtBu}_2$  (*m*- $\text{C}_{\text{Ar}}$ );
- 127.20 ppm, (s),  $(\text{Ph})_2\text{C}=\text{P}-\text{PtBu}_2$  (*p*- $\text{C}_{\text{Ar}}$ );
- 127.13 ppm, (s),  $(\text{Ph})_2\text{C}=\text{P}-\text{PtBu}_2$  (*m*- $\text{C}_{\text{Ar}}$ );
- 33.92 ppm, (dd),  $J_{\text{P-C}} = 30.1$  Hz,  $J_{\text{P-C}} = 4.3$  Hz, -  $(\text{Ph})_2\text{C}=\text{P}-\text{P}\{\text{C}(\text{Me}_3)\}_2$ ;
- 31.08 ppm, (dd),  $J_{\text{P-C}} = 14.4$  Hz,  $J_{\text{P-C}} = 5.4$  Hz,  $(\text{Ph})_2\text{C}=\text{P}-\text{P}\{\text{C}(\text{Me}_3)\}_2$ ;



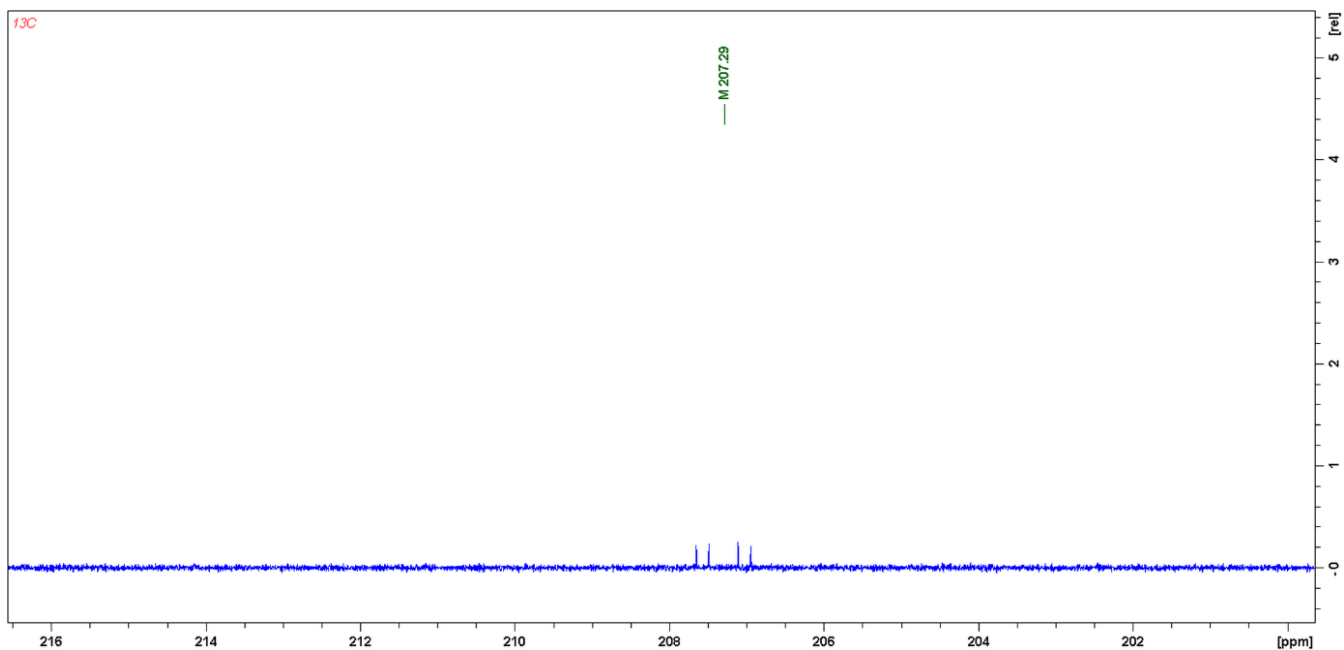

**Figure S53.** <sup>13</sup>C {<sup>1</sup>H} NMR (400 MHz, C<sub>6</sub>D<sub>6</sub>, 298 K) spectrum of isolated (Ph)<sub>2</sub>C=P-PtBu<sub>2</sub> (**3a**) in the range from 216 to 201 ppm.

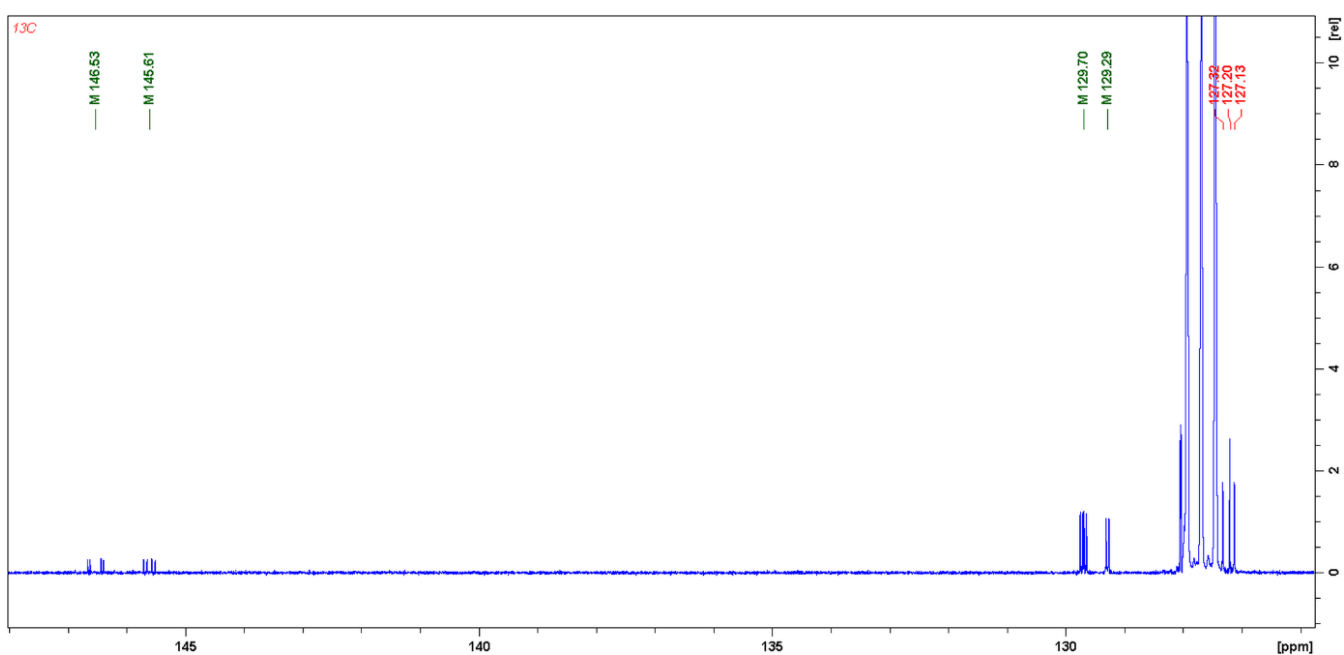

**Figure S54.** <sup>13</sup>C {<sup>1</sup>H} NMR (400 MHz, C<sub>6</sub>D<sub>6</sub>, 298 K) spectrum of isolated (Ph)<sub>2</sub>C=P-PtBu<sub>2</sub> (**3a**) in the range from 146 to 125 ppm.

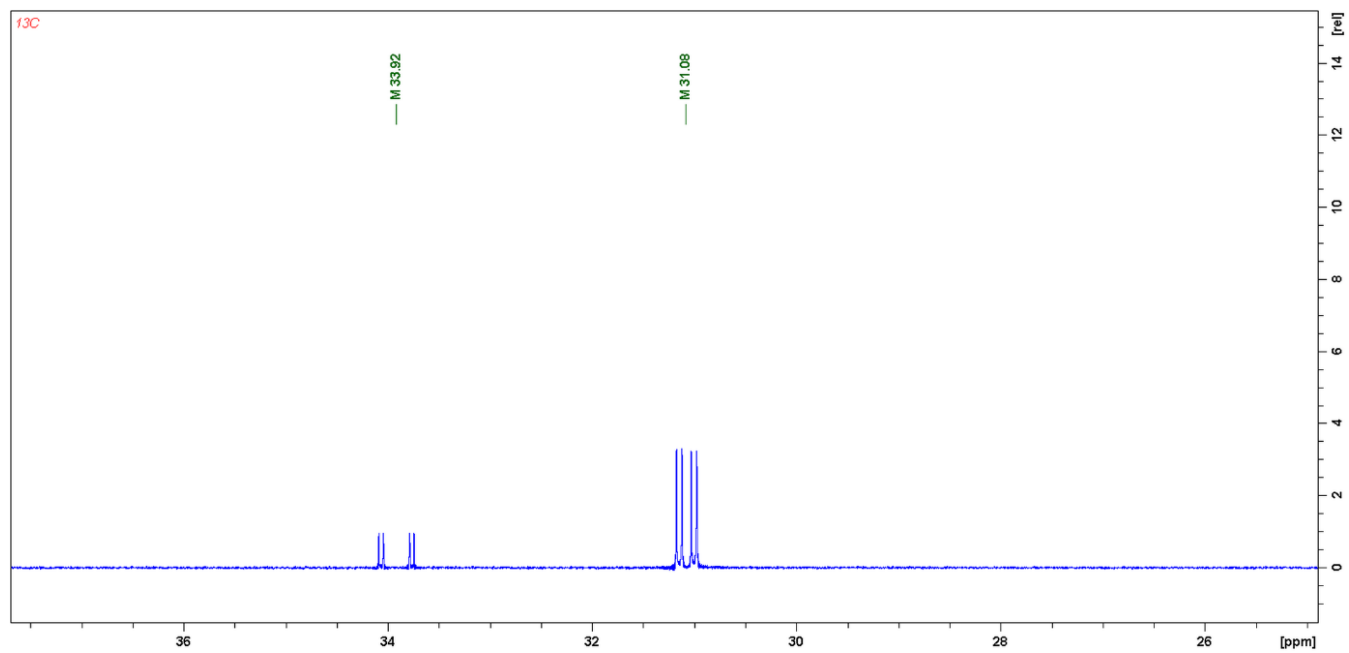

**Figure S55.**  $^{13}\text{C}\{^1\text{H}\}$  NMR (400 MHz,  $\text{C}_6\text{D}_6$ , 298 K) spectrum of isolated  $(\text{Ph})_2\text{C}=\text{P}-\text{PtBu}_2$  (**3a**) in the range from 37 to 25 ppm.

## B.2.2. 9-fluorenone

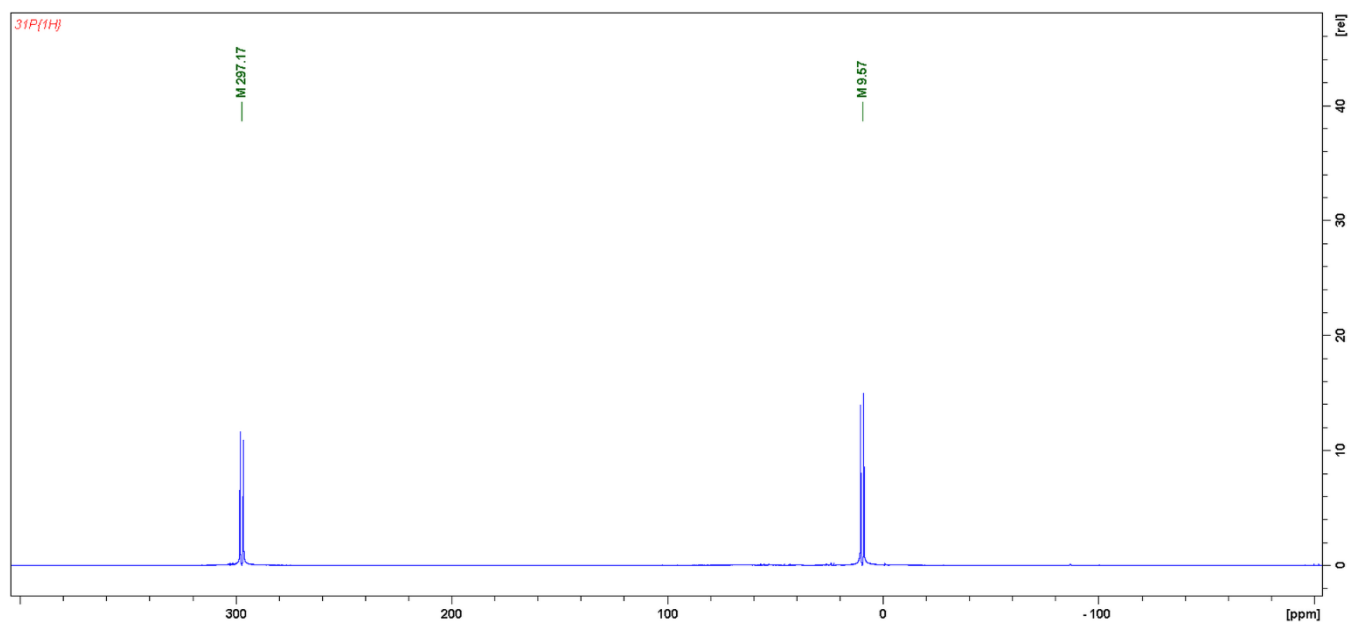

**Figure S56.**  $^{31}\text{P}\{^1\text{H}\}$  NMR(400 MHz, Toluene- $d_8$ , 298 K) spectrum isolated (fluorenyl)C=P-PtBu $_2$  (**3b**).

- 297.17 ppm, (d),  $J_{\text{P-P}} = 228.4$  Hz, (fluorenyl)C=P-PtBu $_2$ ;
- 9.57 ppm, (d),  $J_{\text{P-P}} = 228.4$  Hz, (fluorenyl)C=P-PtBu $_2$ ;

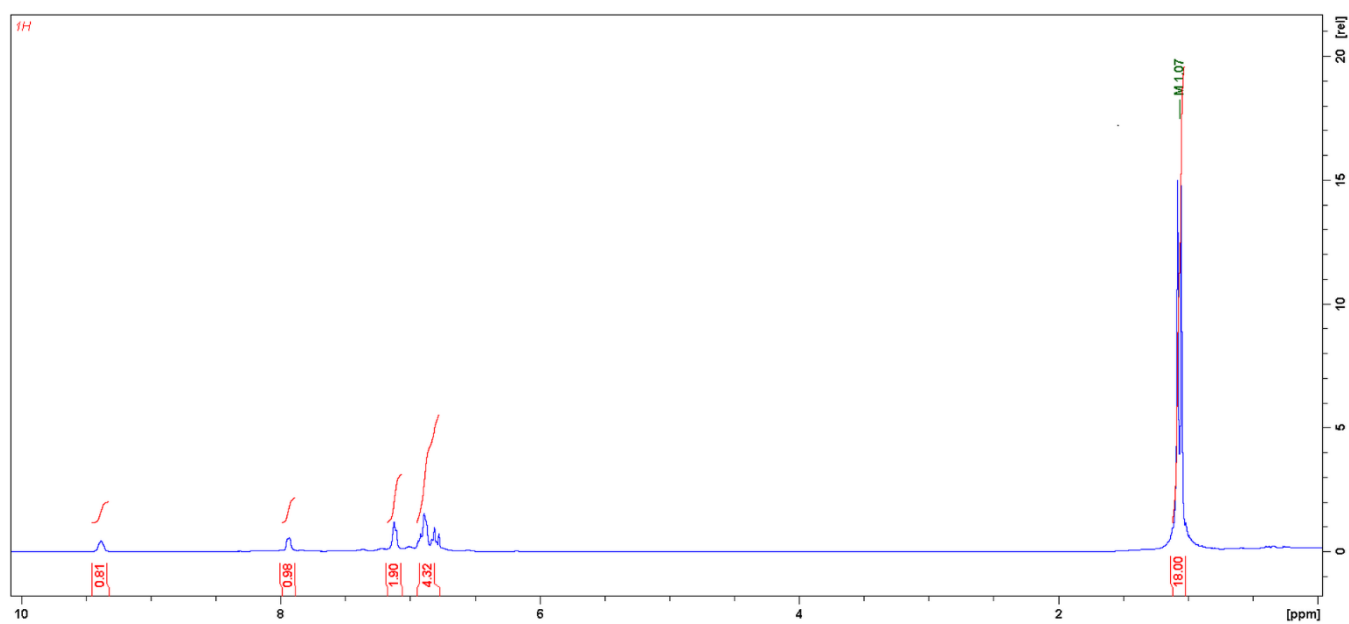

**Figure S57.**  $^1\text{H}$  NMR (400 MHz, Toluene- $d_8$ , 298 K) spectrum of isolated (fluorenyl)C=P-PtBu $_2$  (**3b**).

- 9.43 – 6.76 ppm, aromatic protons of fluorenyl;
- 1.07 ppm, (d),  $J_{\text{P-H}} = 11.9$  Hz, (fluorenyl)C=P-PtBu $_2$ ;

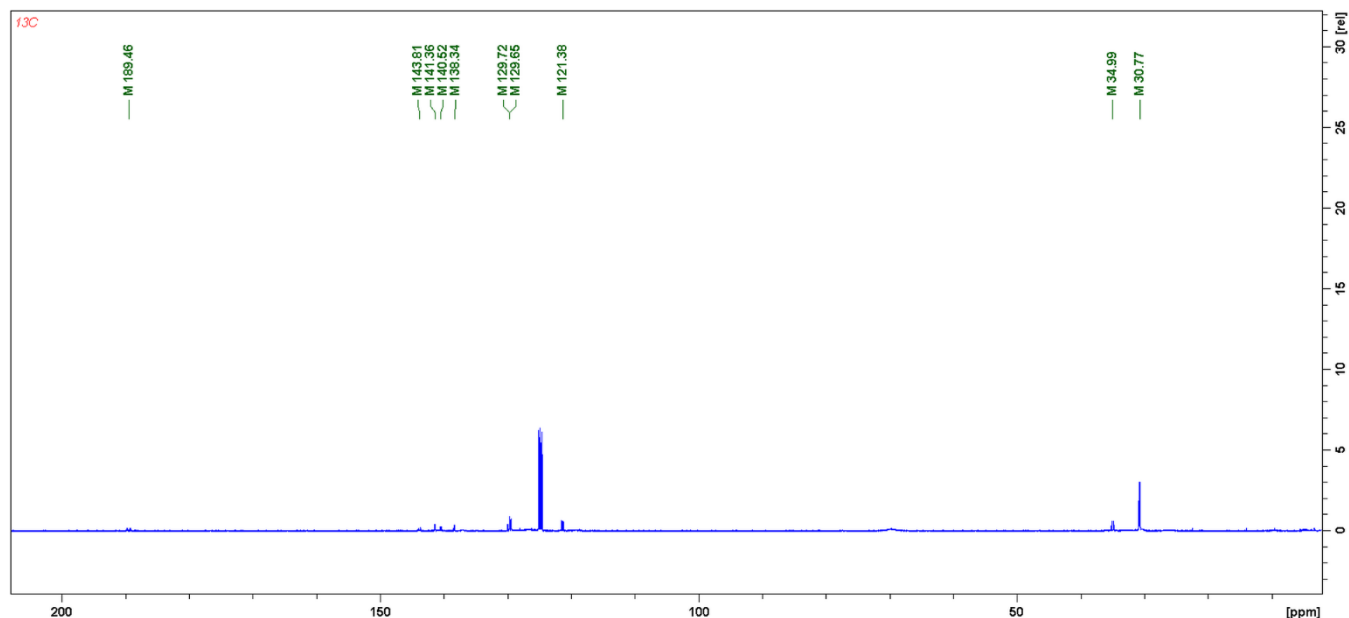

**Figure S58.**  $^{13}\text{C}\{^1\text{H}\}$  NMR (400 MHz, Toluene- $d_8$ , 298 K) spectrum of isolated (fluorenyl)C=P-PtBu $_2$  (**3b**).

- 189.46 ppm, (dd),  $J_{\text{P-C}} = 54.5$  Hz,  $J_{\text{P-C}} = 10.9$  Hz, (fluorenyl)C=P-PtBu $_2$ ;
- 143.81 ppm, (dd),  $J_{\text{P-C}} = 26.3$  Hz,  $J_{\text{P-C}} = 8.2$  Hz, (fluorenyl)C=P-PtBu $_2$ ;
- 141.36 ppm, (d),  $J_{\text{P-C}} = 9.1$  Hz, (fluorenyl)C=P-PtBu $_2$ ;
- 140.52 ppm, (dd),  $J_{\text{P-C}} = 18.6$  Hz,  $J_{\text{P-C}} = 1.3$  Hz, (fluorenyl)C=P-PtBu $_2$ ;
- 138.34 ppm, (d),  $J_{\text{P-C}} = 13.6$  Hz, (fluorenyl)C=P-PtBu $_2$ ;
- 129.72 ppm, (dd),  $J_{\text{P-C}} = 59.0$  Hz,  $J_{\text{P-C}} = 5.4$  Hz, (fluorene)C=P-PtBu $_2$ ;
- 129.65 ppm, (dd),  $J_{\text{P-C}} = 5.7$  Hz,  $J_{\text{P-C}} = 3.9$  Hz, (fluorenyl)C=P-PtBu $_2$ ;
- 121.38 ppm, (d),  $J_{\text{P-C}} = 25.4$  Hz, (fluorenyl)C=P-PtBu $_2$ ;
- 34.99 ppm, (dd),  $J_{\text{P-C}} = 27.9$  Hz,  $J_{\text{P-C}} = 3.1$  Hz, (fluorenyl)C=P-P{C(CH $_3$ ) $_3$ } $_2$ ;
- 30.77 ppm, (dd),  $J_{\text{P-C}} = 14.1$  Hz,  $J_{\text{P-C}} = 5.3$  Hz, (fluorenyl)C=P-P{C(CH $_3$ ) $_3$ } $_2$ ;

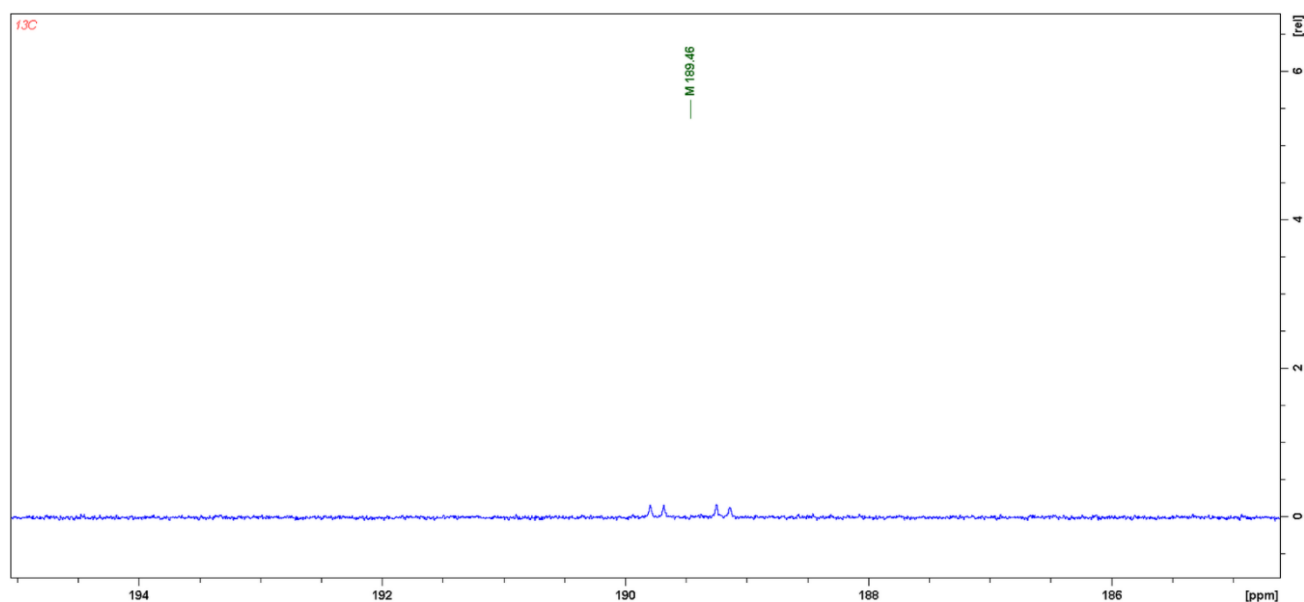

**Figure S59.**  $^{13}\text{C}\{^1\text{H}\}$  NMR (400 MHz, Toluene- $d_8$ , 298 K) spectrum of isolated (fluorenyl)C=P-PtBu $_2$  (**3b**) in the range from 195 ppm to 185 ppm.

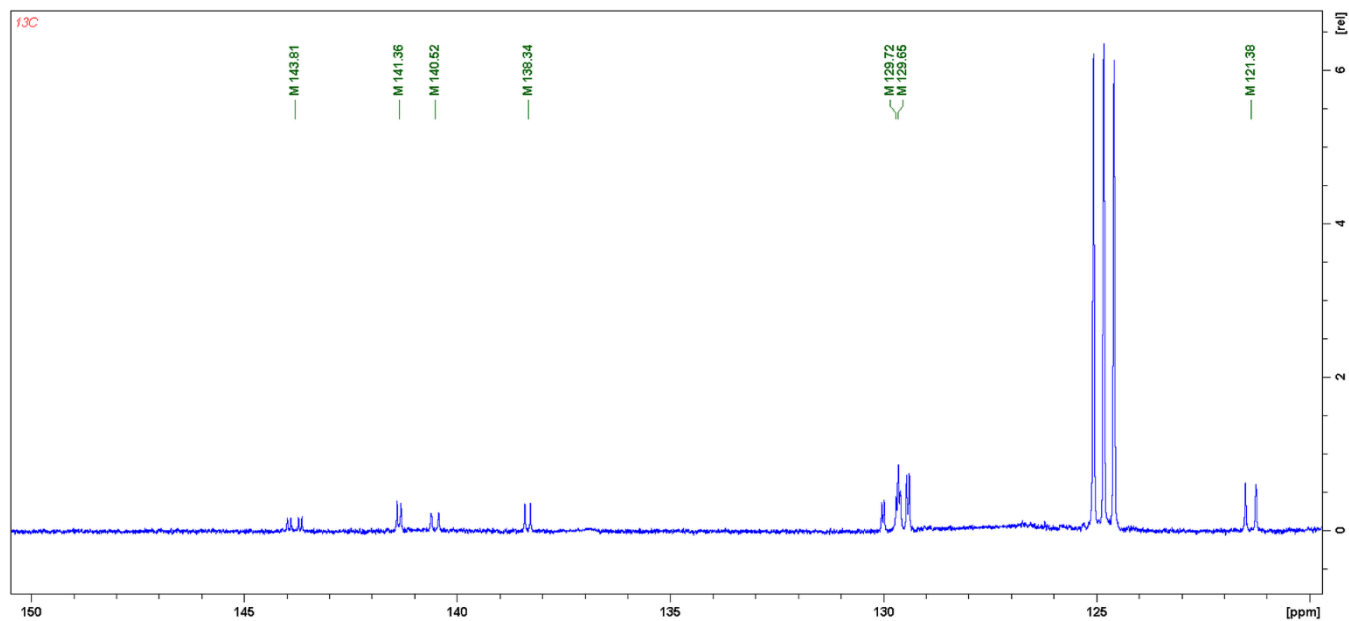

**Figure S60.**  $^{13}\text{C}\{^1\text{H}\}$  NMR (400 MHz, Toluene- $d_8$ , 298 K) spectrum of isolated (fluorenyl)C=P-PtBu $_2$  (**3b**) in the range from 150 ppm to 120 ppm.

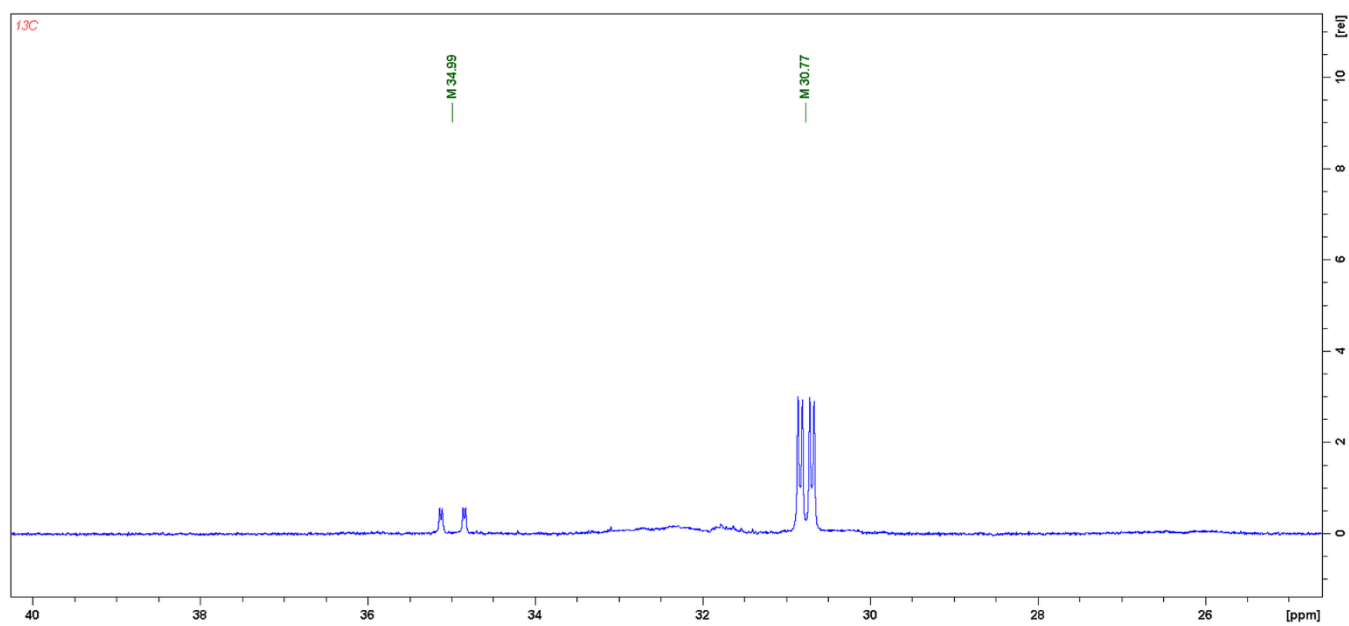

**Figure S61.**  $^{13}\text{C}\{^1\text{H}\}$  NMR (400 MHz, Toluene- $d_8$ , 298 K) spectrum of isolated (fluorenyl)C=P-PtBu $_2$  (**3b**) in the range from 40 ppm to 25 ppm.

### B.2.3. 4-cyanobenzophenone

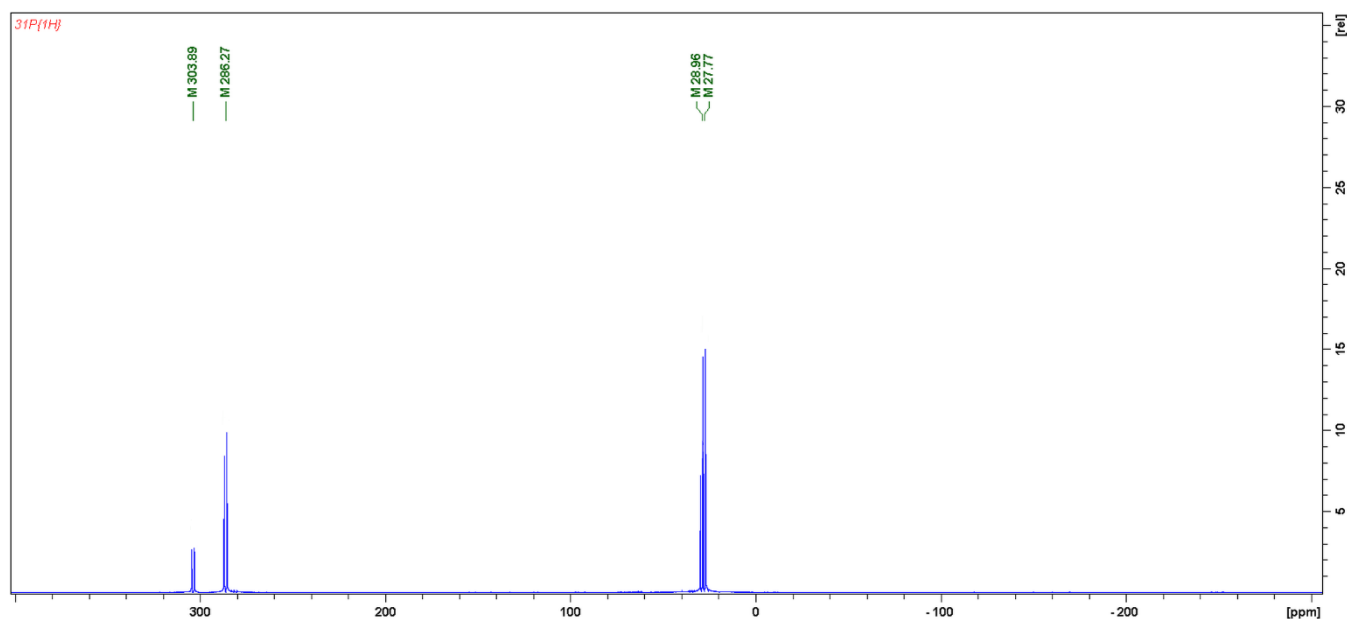

**Figure S62.**  $^{31}\text{P}\{^1\text{H}\}$  NMR (400 MHz, C<sub>6</sub>D<sub>6</sub>, 298 K) spectrum of isolated (Ph)(4-CN-Ph)C=P-PtBu<sub>2</sub> (**3c**).

- 303.89 ppm, (d),  $J_{\text{P-P}} = 228.9$  Hz, (Ph)(4-CN-Ph)C=P-PtBu<sub>2</sub> – *E* isomer;
- 286.27 ppm, (d),  $J_{\text{P-P}} = 228.9$  Hz, (Ph)(4-CN-Ph)C=P-PtBu<sub>2</sub> – *Z* isomer;
- 28.96 ppm, (d),  $J_{\text{P-P}} = 228.9$  Hz, (Ph)(4-CN-Ph)C=P-PtBu<sub>2</sub> – *E* isomer;
- 27.77 ppm, (d),  $J_{\text{P-P}} = 228.9$  Hz, (Ph)(4-CN-Ph)C=P-PtBu<sub>2</sub> – *Z* isomer;

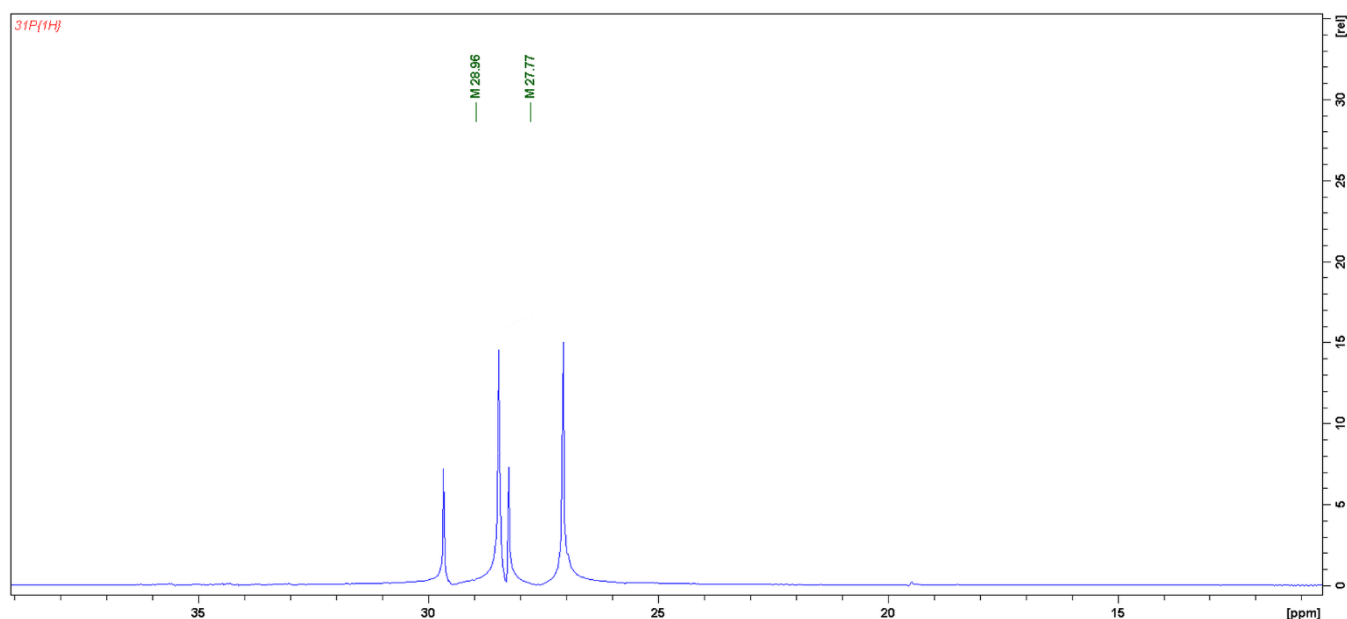

**Figure S63.**  $^{31}\text{P}\{^1\text{H}\}$  NMR (400 MHz, C<sub>6</sub>D<sub>6</sub>, 298 K) spectrum of isolated (Ph)(4-CN-Ph)C=P-PtBu<sub>2</sub> (**3c**) in the range from 40 ppm to 10 ppm.

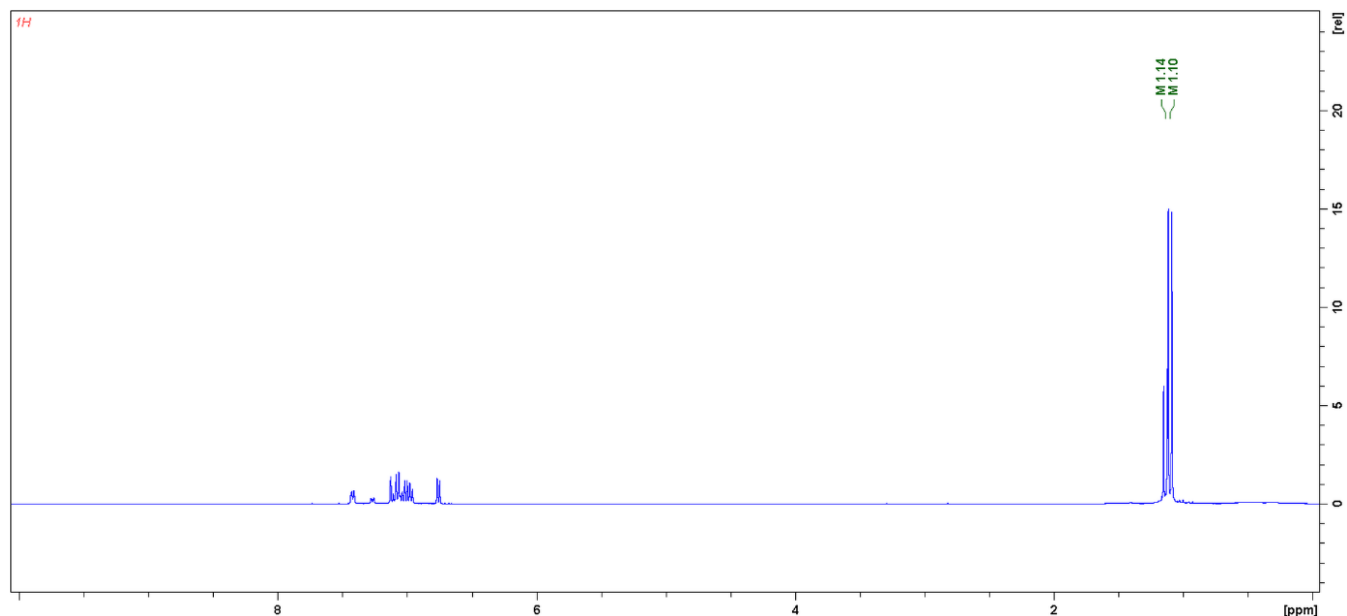

**Figure S64.**  $^1\text{H}$  NMR (400 MHz,  $\text{C}_6\text{D}_6$ , 298 K) spectrum of isolated  $(\text{Ph})(4\text{-CN-Ph})\text{C}=\text{P-P}t\text{Bu}_2$  (**3c**).

- 7.50 ppm – 6.70 ppm, 10H,  $(\text{Ph})(4\text{-CN-Ph})\text{C}=\text{P-P}t\text{Bu}_2$ ;
- 1.14 ppm, (d),  $J_{\text{P-H}} = 10.9$  Hz, 18H,  $(\text{Ph})(4\text{-CN-Ph})\text{C}=\text{P-P}t\text{Bu}_2$  – *E* isomer ;
- 1.10 ppm, (d),  $J_{\text{P-H}} = 10.9$  Hz, 18H,  $(\text{Ph})(4\text{-CN-Ph})\text{C}=\text{P-P}t\text{Bu}_2$  – *Z* isomer;

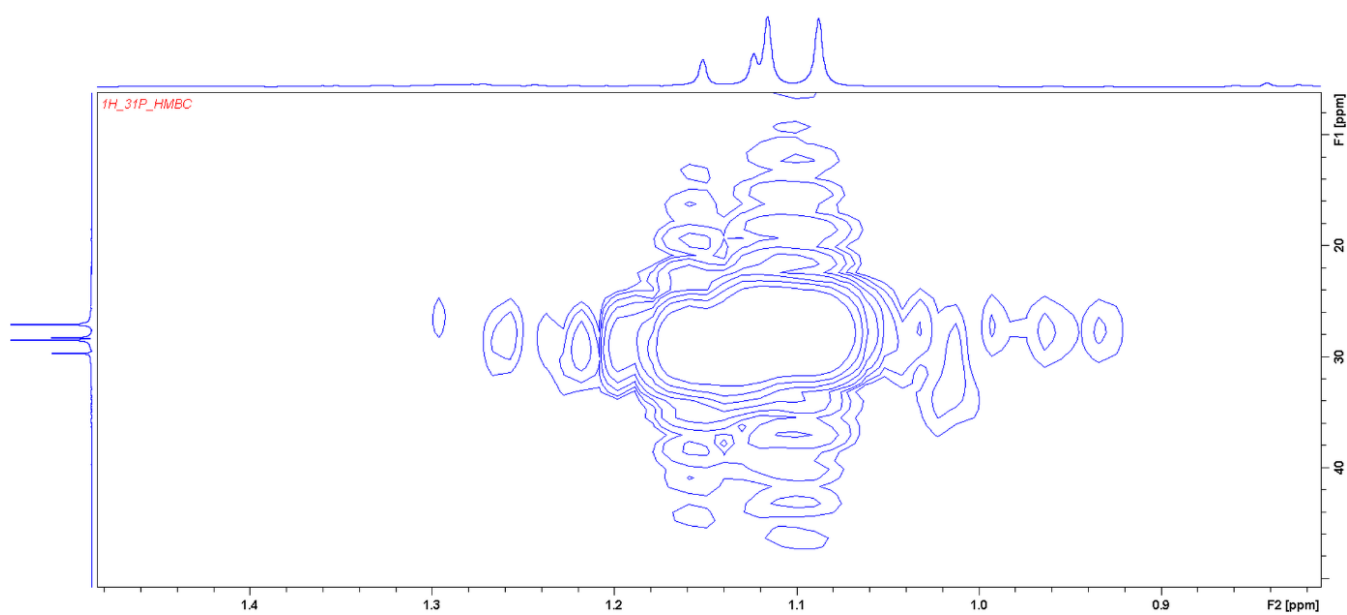

**Figure S65.**  $^{31}\text{P}\{^1\text{H}\}/^1\text{H}$ -HMBC (400 MHz,  $\text{C}_6\text{D}_6$ , 298 K) spectrum of isolated  $(\text{Ph})(4\text{-CN-Ph})\text{C}=\text{P-P}t\text{Bu}_2$  (**3c**).

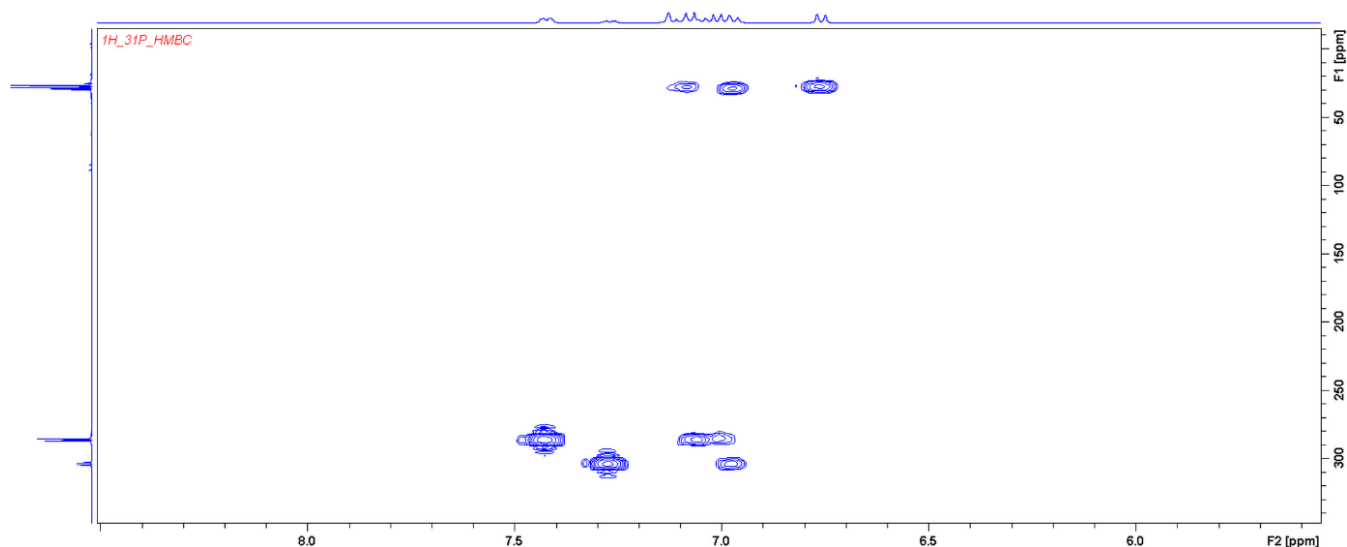

**Figure S66.**  $^{31}\text{P}\{^1\text{H}\}/^1\text{H}$ -HMBC (400 MHz,  $\text{C}_6\text{D}_6$ , 298 K) spectrum of isolated  $(\text{Ph})(4\text{-CN-Ph})\text{C}=\text{P-P}t\text{Bu}_2$  (**3c**) (correlation of aromatic protons).

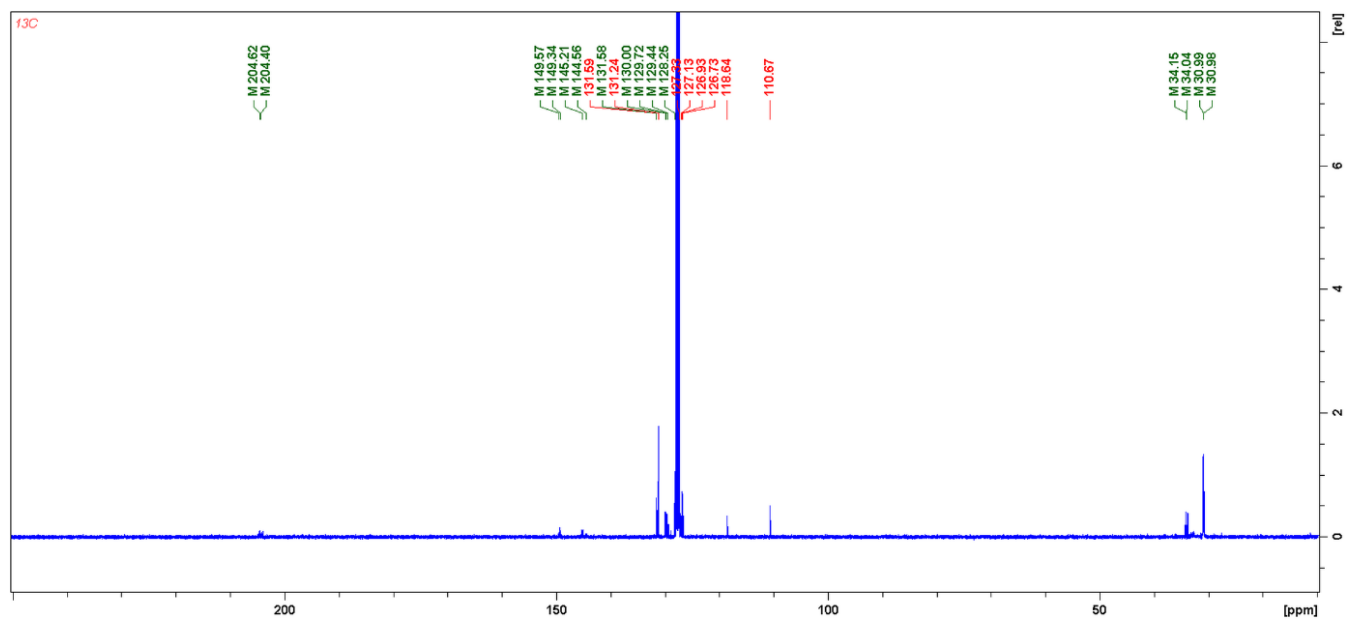

**Figure S67.**  $^{13}\text{C}\{^1\text{H}\}$  NMR (400 MHz,  $\text{C}_6\text{D}_6$ , 298 K) spectrum of isolated  $(\text{Ph})(4\text{-CN-Ph})\text{C}=\text{P-P}t\text{Bu}_2$  (**3c**).

- 204.62 ppm, (dd),  $J_{\text{P-C}} = 54.4$  Hz,  $J_{\text{P-C}} = 16.8$  Hz,  $(\text{Ph})(4\text{-CN-Ph})\text{C}=\text{P-P}t\text{Bu}_2$  – *E* isomer;
- 204.40 ppm, (dd),  $J_{\text{P-C}} = 55.5$  Hz,  $J_{\text{P-C}} = 17.1$  Hz,  $(\text{Ph})(4\text{-CN-Ph})\text{C}=\text{P-P}t\text{Bu}_2$  – *Z* isomer;
- 149.57 ppm, (dd),  $J_{\text{P-C}} = 24.1$  Hz,  $J_{\text{P-C}} = 3.7$  Hz,  $(\text{Ph})(4\text{-CN-Ph})\text{C}=\text{P-P}t\text{Bu}_2$  (*i*- $\text{C}_{\text{Ar}}$ ) – *Z* isomer;
- 149.34 ppm, (dd),  $J_{\text{P-C}} = 13.7$  Hz,  $J_{\text{P-C}} = 6.2$  Hz,  $(\text{Ph})(4\text{-CN-Ph})\text{C}=\text{P-P}t\text{Bu}_2$  (*i*- $\text{C}_{\text{Ar}}$ ) – *E* isomer;
- 145.21 ppm, (dd),  $J_{\text{P-C}} = 22.1$  Hz,  $J_{\text{P-C}} = 4.2$  Hz,  $(\text{Ph})(4\text{-CN-Ph})\text{C}=\text{P-P}t\text{Bu}_2$  (*i*- $\text{C}_{\text{Ar}}$ ) – *E* isomer;
- 144.56 ppm, (dd),  $J_{\text{P-C}} = 20.1$  Hz,  $J_{\text{P-C}} = 5.6$  Hz,  $(\text{Ph})(4\text{-CN-Ph})\text{C}=\text{P-P}t\text{Bu}_2$  (*i*- $\text{C}_{\text{Ar}}$ ) – *Z* isomer;
- 131.58 ppm, (d),  $J_{\text{P-C}} = 1.0$  Hz,  $(\text{Ph})(4\text{-CN-Ph})\text{C}=\text{P-P}t\text{Bu}_2$  (*p*- $\text{C}_{\text{Ar}}$ ) – *Z* isomer;
- 131.24 ppm, (s),  $(\text{Ph})(4\text{-CN-Ph})\text{C}=\text{P-P}t\text{Bu}_2$  (*o*- $\text{C}_{\text{Ar}}$ ) – *E* isomer;
- 130.00 ppm, (dd),  $J_{\text{P-C}} = 6.6$  Hz,  $J_{\text{P-C}} = 4.1$  Hz,  $(\text{Ph})(4\text{-CN-Ph})\text{C}=\text{P-P}t\text{Bu}_2$  (*o*- $\text{C}_{\text{Ar}}$ ) – *Z* isomer;



- 129.72 ppm, (d),  $J_{P-C} = 4.8$  Hz, **(Ph)(4-CN-Ph)C=P-PtBu<sub>2</sub>** (*o*-C<sub>Ar</sub>) – *E* isomer;
- 129.44 ppm, (dd),  $J_{P-C} = 6.5$  Hz,  $J_{P-C} = 4.2$  Hz, **(Ph)(4-CN-Ph)C=P-PtBu<sub>2</sub>** (*o*-C<sub>Ar</sub>) – *E* isomer;
- 128.24 ppm, (d),  $J_{P-C} = 0.9$  Hz, **(Ph)(4-CN-Ph)C=P-PtBu<sub>2</sub>** (*p*-C<sub>Ar</sub>) – *E* isomer;
- 127.33 ppm, (s), **(Ph)(4-CN-Ph)C=P-PtBu<sub>2</sub>** (*m*-C<sub>Ar</sub>) – *Z* isomer;
- 127.13 ppm, (s), **(Ph)(4-CN-Ph)C=P-PtBu<sub>2</sub>** (*m*-C<sub>Ar</sub>) – *Z* isomer;
- 126.93 ppm, (s), **(Ph)(4-CN-Ph)C=P-PtBu<sub>2</sub>** (*m*-C<sub>Ar</sub>) – *E* isomer;
- 126.73 ppm, (s), **(Ph)(4-CN-Ph)C=P-PtBu<sub>2</sub>** (*m*-C<sub>Ar</sub>) – *E* isomer;
- 118.64 ppm, (s), **(Ph)(4-CN-Ph)C=P-PtBu<sub>2</sub>** (*m*-C<sub>Ar</sub>) – *Z* isomer;
- 110.67 ppm, (s), **(Ph)(4-CN-Ph)C=P-PtBu<sub>2</sub>** (*m*-C<sub>Ar</sub>) – *E* isomer;
- 34.15 ppm, (dd),  $J_{P-C} = 30.2$  Hz,  $J_{P-C} = 4.1$  Hz, **(Ph)(4-CN-Ph)C=P-P{C(CH<sub>3</sub>)<sub>3</sub>}<sub>2</sub>** – *E* isomer;
- 34.04 ppm, (dd),  $J_{P-C} = 29.5$  Hz,  $J_{P-C} = 4.1$  Hz, **(Ph)(4-CN-Ph)C=P-P{C(CH<sub>3</sub>)<sub>3</sub>}<sub>2</sub>** – *Z* isomer;
- 30.99 ppm, (dd),  $J_{P-C} = 14.3$  Hz,  $J_{P-C} = 5.6$  Hz, **(Ph)(4-CN-Ph)C=P-P{C(CH<sub>3</sub>)<sub>3</sub>}<sub>2</sub>** – *E* isomer;
- 30.98 ppm, (dd),  $J_{P-C} = 14.2$  Hz,  $J_{P-C} = 5.3$  Hz, **(Ph)(4-CN-Ph)C=P-P{C(CH<sub>3</sub>)<sub>3</sub>}<sub>2</sub>** – *Z* isomer;

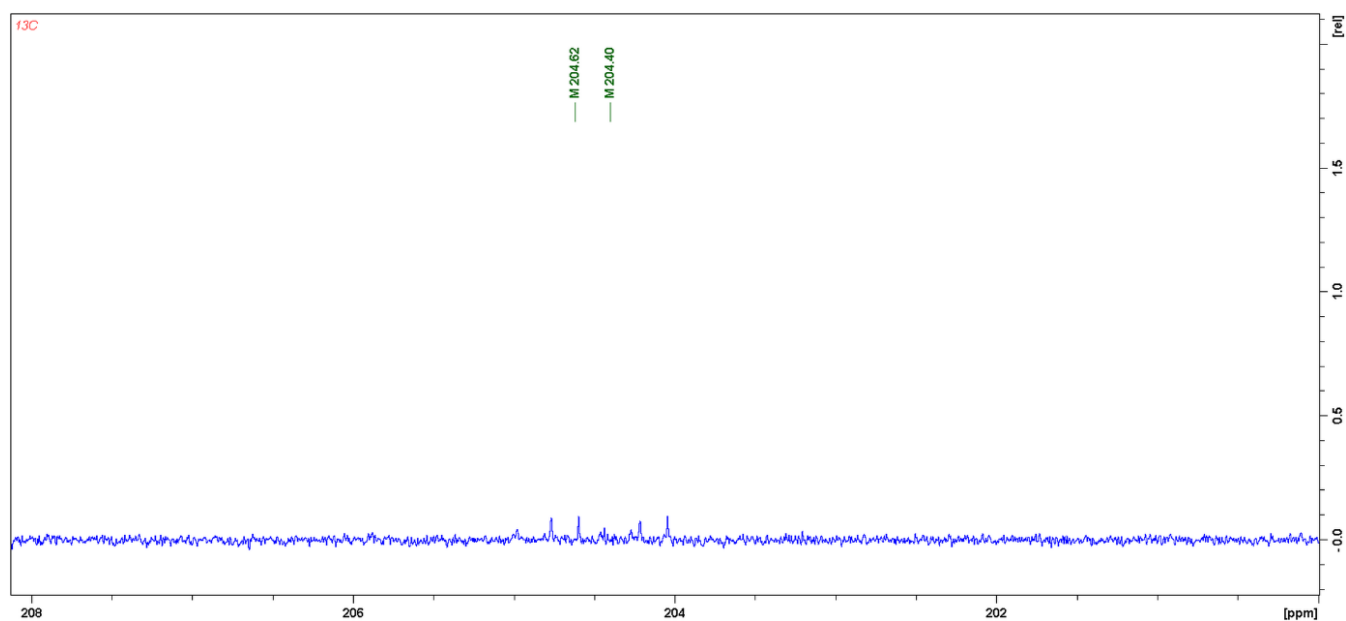

**Figure S68.**  $^{13}\text{C}\{^1\text{H}\}$  NMR (400 MHz,  $\text{C}_6\text{D}_6$ , 298 K) spectrum of isolated **(Ph)(4-CN-Ph)C=P-PtBu<sub>2</sub>** (**3c**) in the range from 208 to 201 ppm.

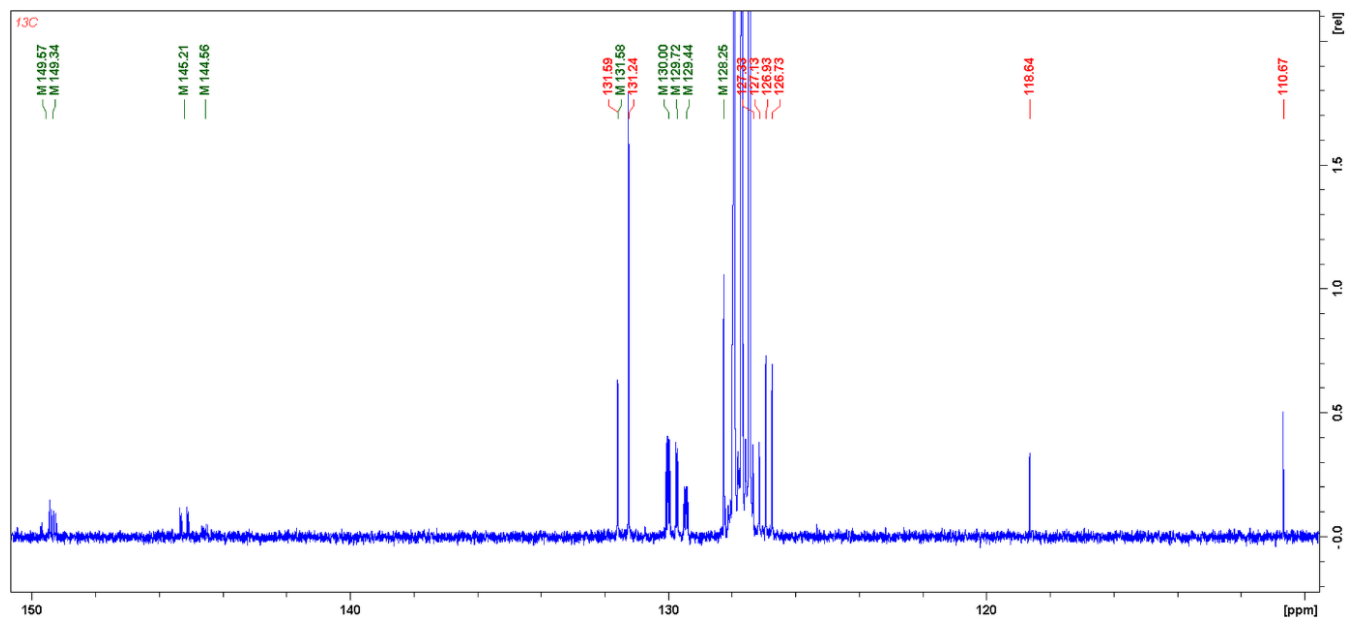

**Figure S69.** <sup>13</sup>C{<sup>1</sup>H} NMR (400 MHz, C<sub>6</sub>D<sub>6</sub>, 298 K) spectrum of isolated (Ph)(4-CN-Ph)C=P-P*t*Bu<sub>2</sub> (**3c**) in the range from 150 to 110 ppm.

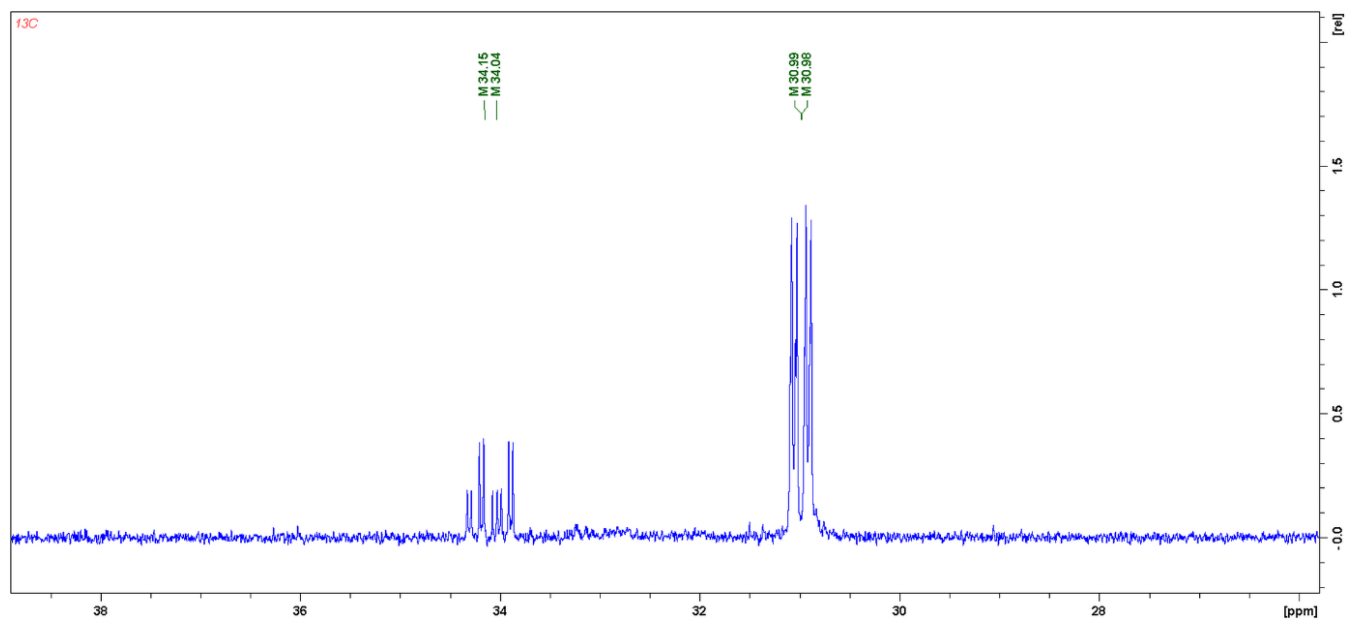

**Figure S70.** <sup>13</sup>C{<sup>1</sup>H} NMR (400 MHz, C<sub>6</sub>D<sub>6</sub>, 298 K) spectrum of isolated (Ph)(4-CN-Ph)C=P-P*t*Bu<sub>2</sub> (**3c**) in the range from 38 to 27 ppm.

### B.2.4. 4,4'-dicyanobenzophenone

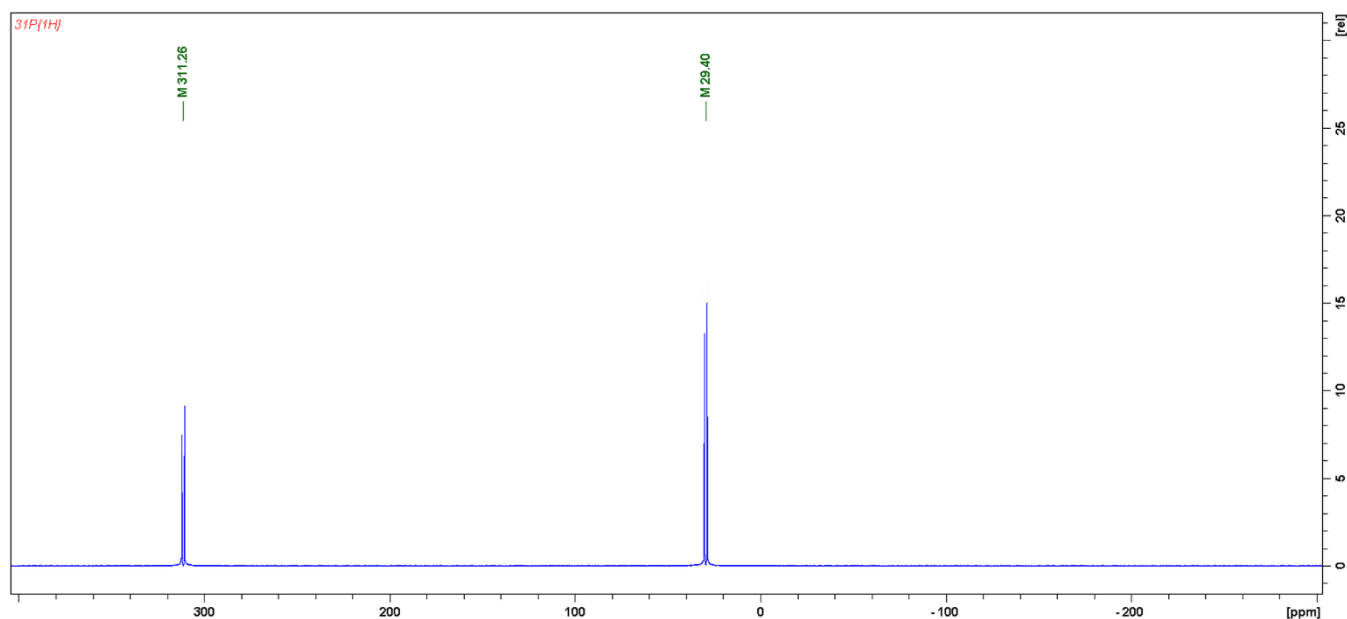

**Figure S71.**  $^{31}\text{P}\{^1\text{H}\}$  NMR (400 MHz,  $\text{C}_6\text{D}_6$ , 298 K) spectrum of isolated  $(4\text{-CN-Ph})_2\text{C}=\text{P-P}t\text{Bu}_2$  (**3d**).

- 311.26 ppm, (d),  $J_{\text{P-P}} = 232.5$  Hz,  $(4\text{-CN-Ph})_2\text{C}=\text{P-P}t\text{Bu}_2$ ;
- 29.40 ppm, (d),  $J_{\text{P-P}} = 232.5$  Hz,  $(4\text{-CN-Ph})_2\text{C}=\text{P-P}t\text{Bu}_2$ ;

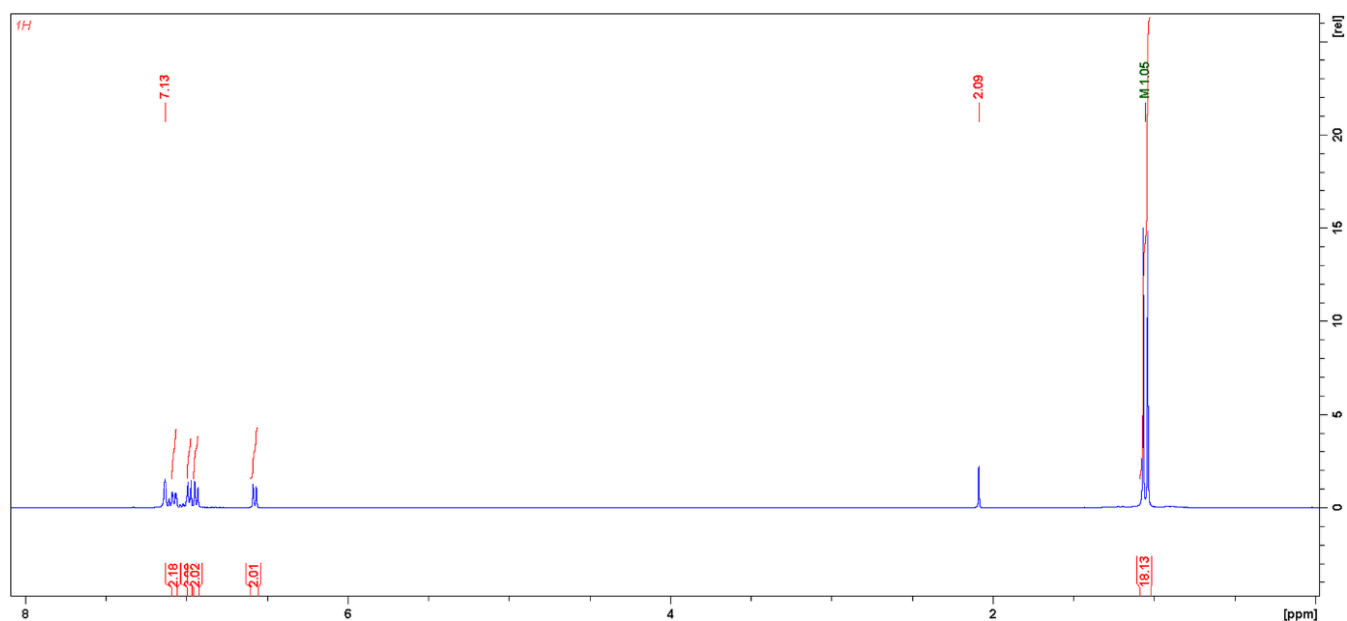

**Figure S72.**  $^1\text{H}$  NMR (400 MHz,  $\text{C}_6\text{D}_6$ , 298 K) spectrum of isolated  $(4\text{-CN-Ph})_2\text{C}=\text{P-P}t\text{Bu}_2$  (**3d**).

- 7.13 ppm, (broad s), aromatic protons of toluene (toluene molecule is present in the unit cell with two molecules of phosphanylphosphaalkenes);
- 7.10 ppm – 6.55 ppm, 8H,  $(4\text{-CN-Ph})_2\text{C}=\text{P-P}t\text{Bu}_2$ ;
- 1.05 ppm, (d),  $J_{\text{P-H}} = 11.4$  Hz, 18H,  $(4\text{-CN-Ph})_2\text{C}=\text{P-P}t\text{Bu}_2$ ;

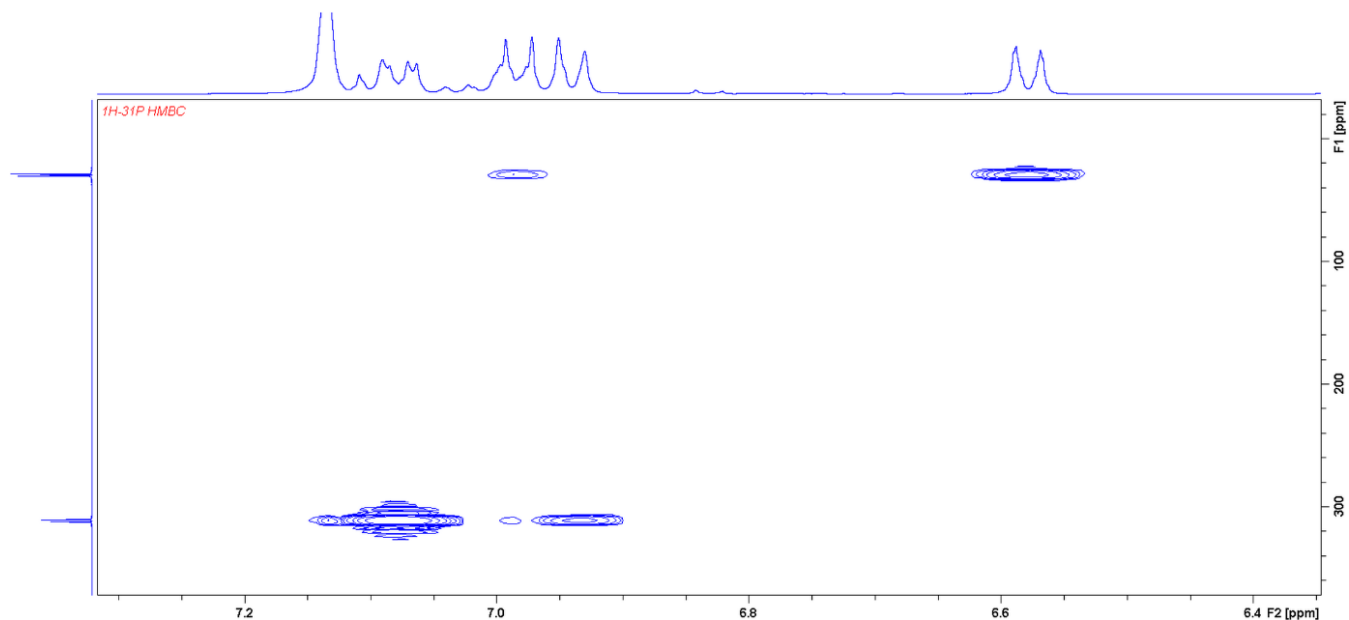

**Figure S73.**  $^{31}\text{P}\{^1\text{H}\}/^1\text{H}$ -HMBC (400 MHz,  $\text{C}_6\text{D}_6$ , 298 K) spectrum of isolated  $(4\text{-CN-Ph})_2\text{C}=\text{P-P}t\text{Bu}_2$  (**3d**) (correlation of aromatic protons).

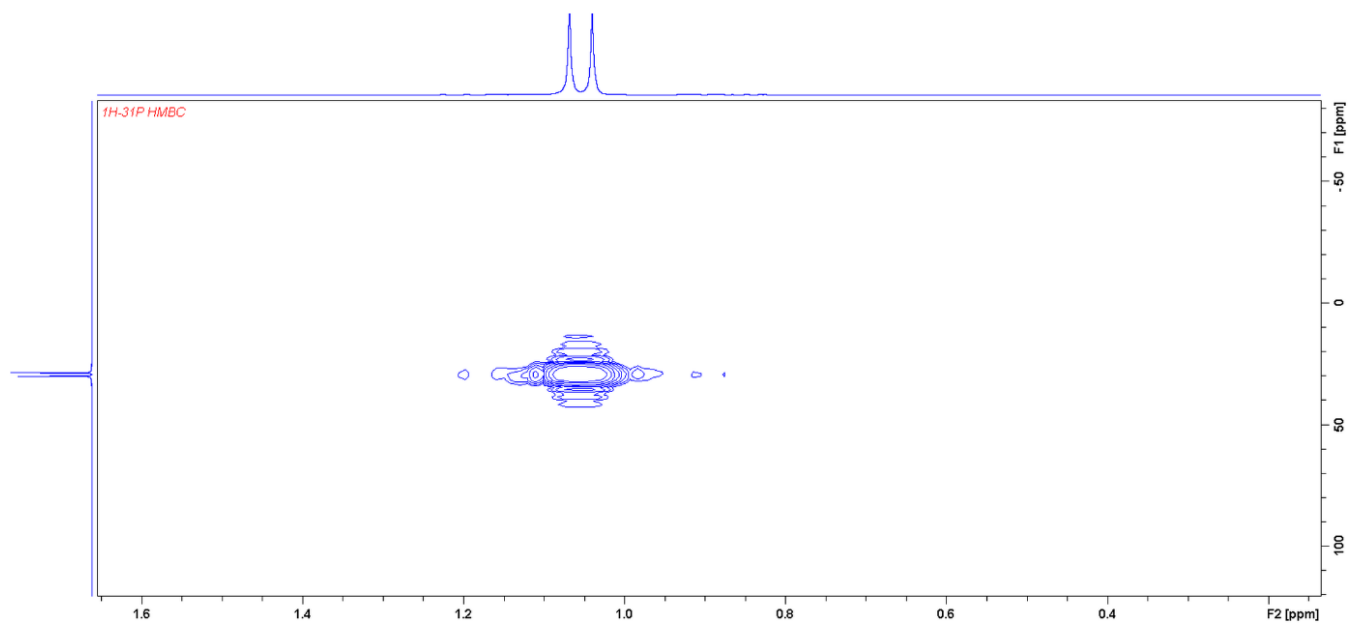

**Figure S74.**  $^{31}\text{P}\{^1\text{H}\}/^1\text{H}$ -HMBC (400 MHz,  $\text{C}_6\text{D}_6$ , 298 K) spectrum of isolated  $(4\text{-CN-Ph})_2\text{C}=\text{P-P}t\text{Bu}_2$  (**3d**) (correlation of *tert*-butyl groups protons).

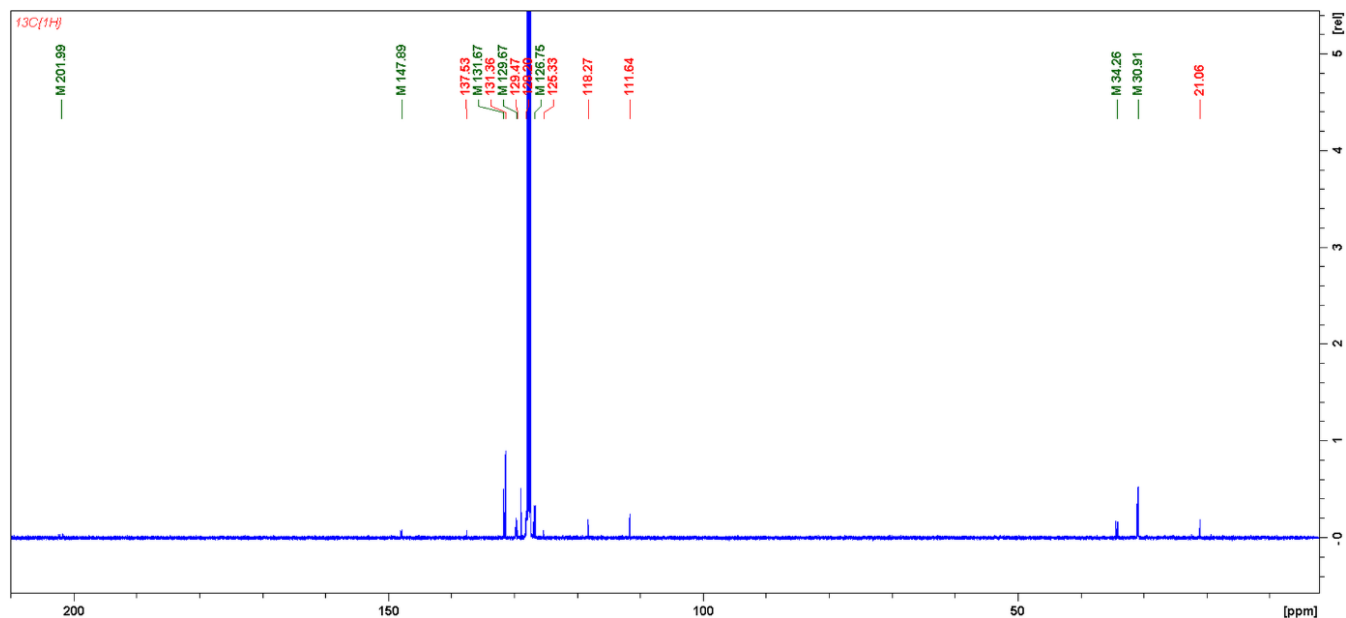

**Figure S75.**  $^{13}\text{C}\{^1\text{H}\}$  NMR (400 MHz,  $\text{C}_6\text{D}_6$ , 298 K) spectrum of isolated  $(4\text{-CN-Ph})_2\text{C}=\text{P-P}t\text{Bu}_2$  (**3d**).

- 201.99 ppm, (dd),  $J_{\text{P-C}} = 55.6$  Hz,  $J_{\text{P-C}} = 17.6$  Hz,  $(4\text{-CN-Ph})_2\text{C}=\text{P-P}t\text{Bu}_2$ ;
- 147.89 ppm, (dd),  $J_{\text{P-C}} = 23.0$  Hz,  $J_{\text{P-C}} = 4.0$  Hz,  $(4\text{-CN-Ph})_2\text{C}=\text{P-P}t\text{Bu}_2$  (*i*- $\text{C}_{\text{Ar}}$ );
- 137.53 ppm, (s), toluene (*i*- $\text{C}_{\text{Ar}}$ );
- 131.67 ppm, (d),  $J_{\text{P-C}} = 1.0$  Hz,  $(4\text{-CN-Ph})_2\text{C}=\text{P-P}t\text{Bu}_2$  (*m*- $\text{C}_{\text{Ar}}$ );
- 131.36 ppm, (s),  $(4\text{-CN-Ph})_2\text{C}=\text{P-P}t\text{Bu}_2$  – (*m*- $\text{C}_{\text{Ar}}$ );
- 129.67 ppm, (dd),  $J_{\text{P-C}} = 6.7$  Hz,  $J_{\text{P-C}} = 4.2$  Hz,  $(4\text{-CN-Ph})_2\text{C}=\text{P-P}t\text{Bu}_2$  (*o*- $\text{C}_{\text{Ar}}$ );
- 129.47 ppm, (s), toluene (*o*- $\text{C}_{\text{Ar}}$ );
- 128.20 ppm, toluene (*m*- $\text{C}_{\text{Ar}}$ );
- 126.75 ppm, (d),  $J_{\text{P-C}} = 20.2$  Hz,  $(4\text{-CN-Ph})_2\text{C}=\text{P-P}t\text{Bu}_2$  (*o*- $\text{C}_{\text{Ar}}$ );
- 125.33 ppm, (s), toluene (*p*- $\text{C}_{\text{Ar}}$ );
- 118.27 ppm, (s),  $(4\text{-CN-Ph})_2\text{C}=\text{P-P}t\text{Bu}_2$ ;
- 111.64 ppm, (s),  $(4\text{-CN-Ph})_2\text{C}=\text{P-P}t\text{Bu}_2$  (*o*- $\text{C}_{\text{Ar}}$ );
- 34.26 ppm, (dd),  $J_{\text{P-C}} = 29.4$  Hz,  $J_{\text{P-C}} = 3.9$  Hz,  $(4\text{-CN-Ph})_2\text{C}=\text{P-P}\{\text{C}(\text{CH}_3)_3\}_2$ ;
- 30.91 ppm, (dd),  $J_{\text{P-C}} = 14.2$  Hz,  $J_{\text{P-C}} = 5.3$  Hz,  $(4\text{-CN-Ph})_2\text{C}=\text{P-P}\{\text{C}(\text{CH}_3)_3\}_2$ ;
- 21.06 ppm, (s), methyl group of toluene;

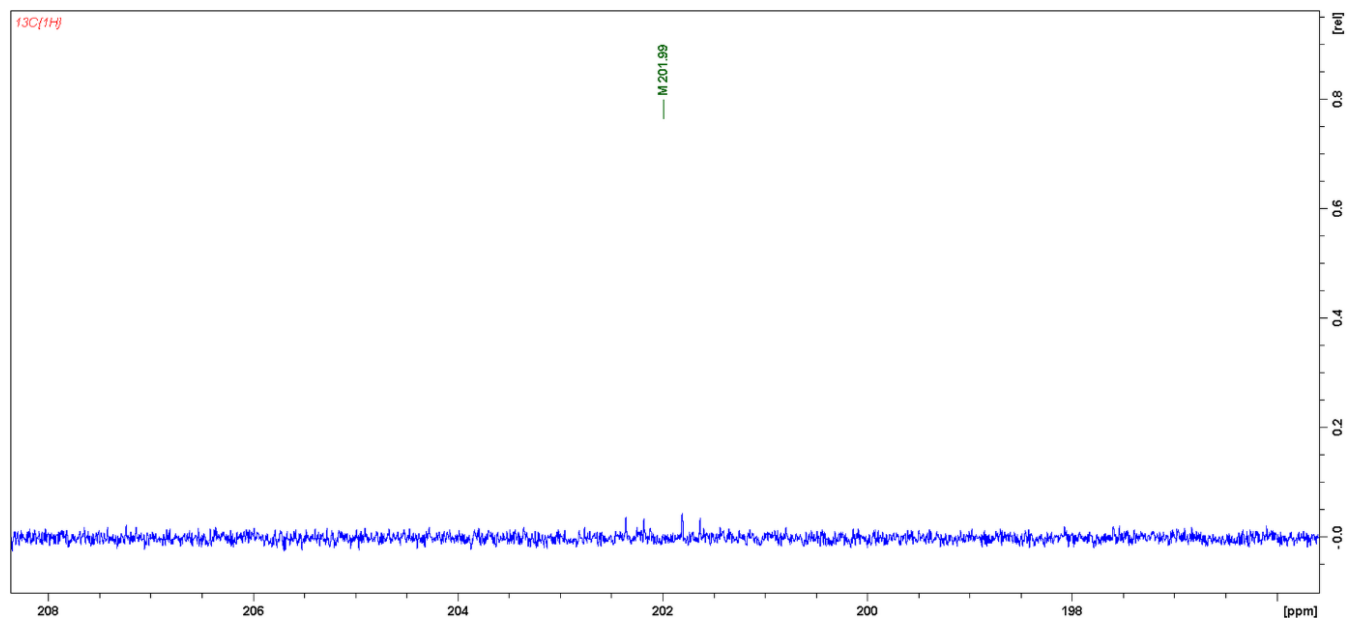

**Figure S76.**  $^{13}\text{C}\{^1\text{H}\}$  NMR (400 MHz,  $\text{C}_6\text{D}_6$ , 298 K) spectrum of isolated  $(4\text{-CN-Ph})_2\text{C}=\text{P-P}t\text{Bu}_2$  (**3d**) in the range from 208 ppm to 196 ppm.

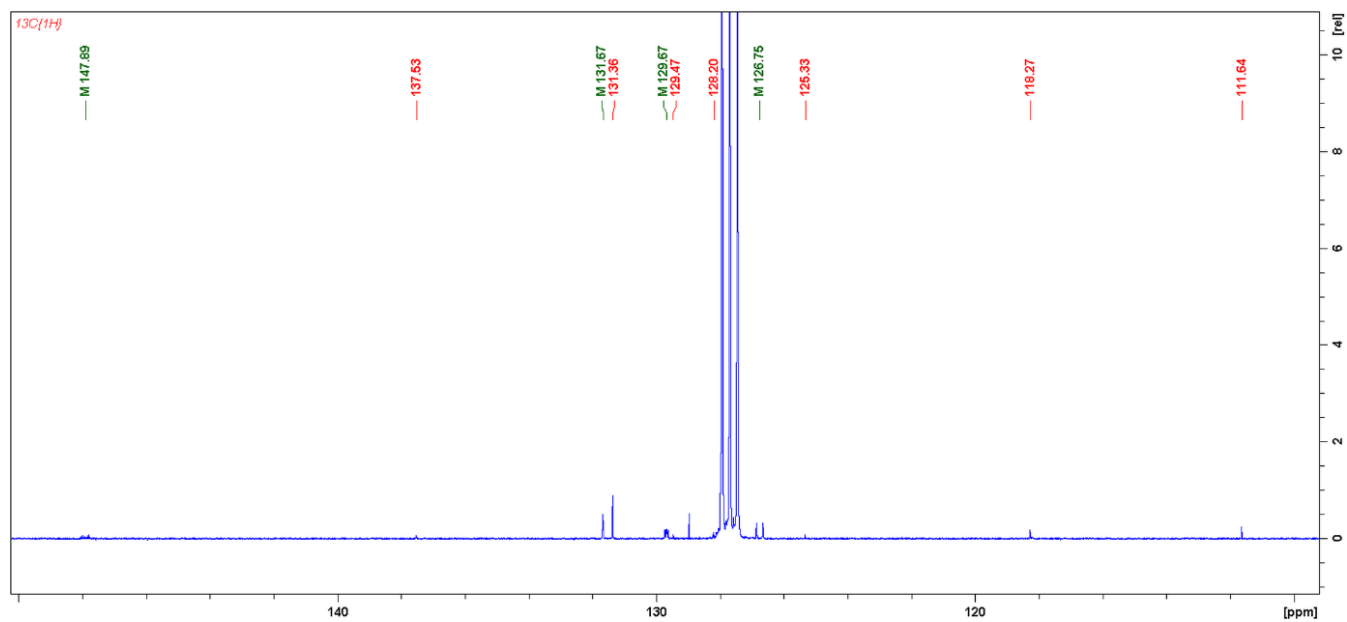

**Figure S77.**  $^{13}\text{C}\{^1\text{H}\}$  NMR (400 MHz,  $\text{C}_6\text{D}_6$ , 298 K) spectrum of isolated  $(4\text{-CN-Ph})_2\text{C}=\text{P-P}t\text{Bu}_2$  (**3d**) in the range from 150 ppm to 110 ppm.

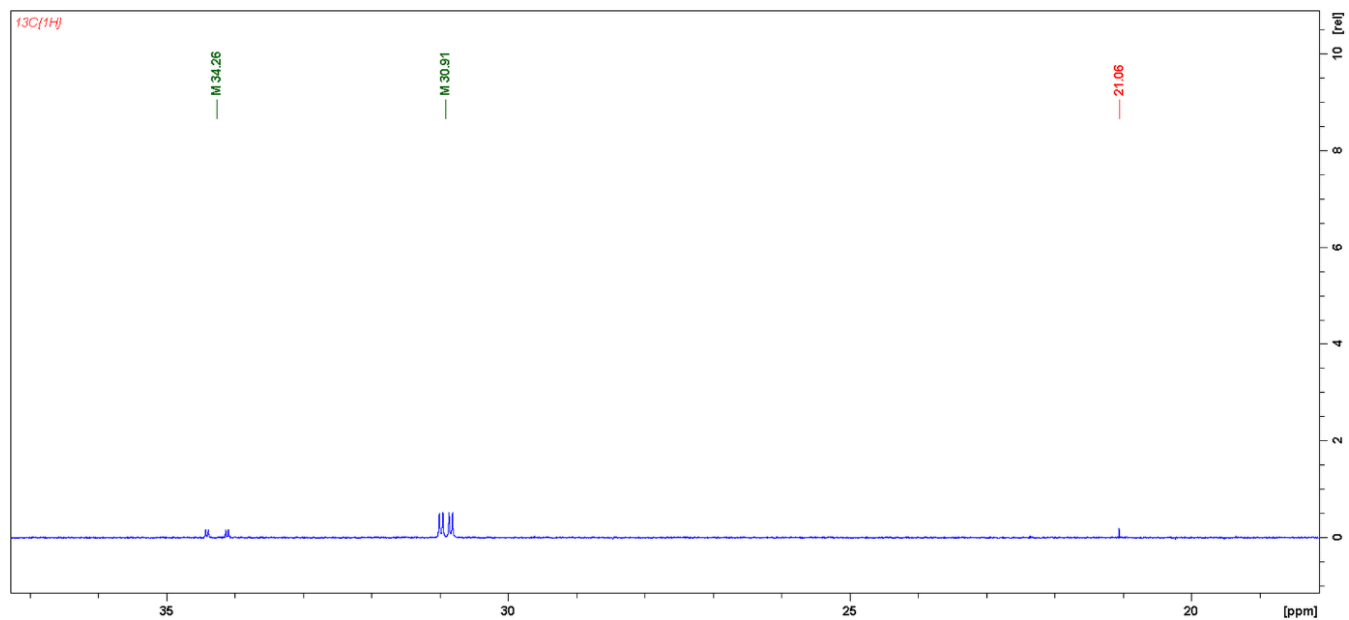

**Figure S78.**  $^{13}\text{C}\{^1\text{H}\}$  NMR (400 MHz,  $\text{C}_6\text{D}_6$ , 298 K) spectrum of isolated  $(4\text{-CN-Ph})_2\text{C}=\text{P-P}t\text{Bu}_2$  (**3d**) in the range from 40 ppm to 25 ppm.

### B.2.5. 4,4'-dimethoxybenzophenone

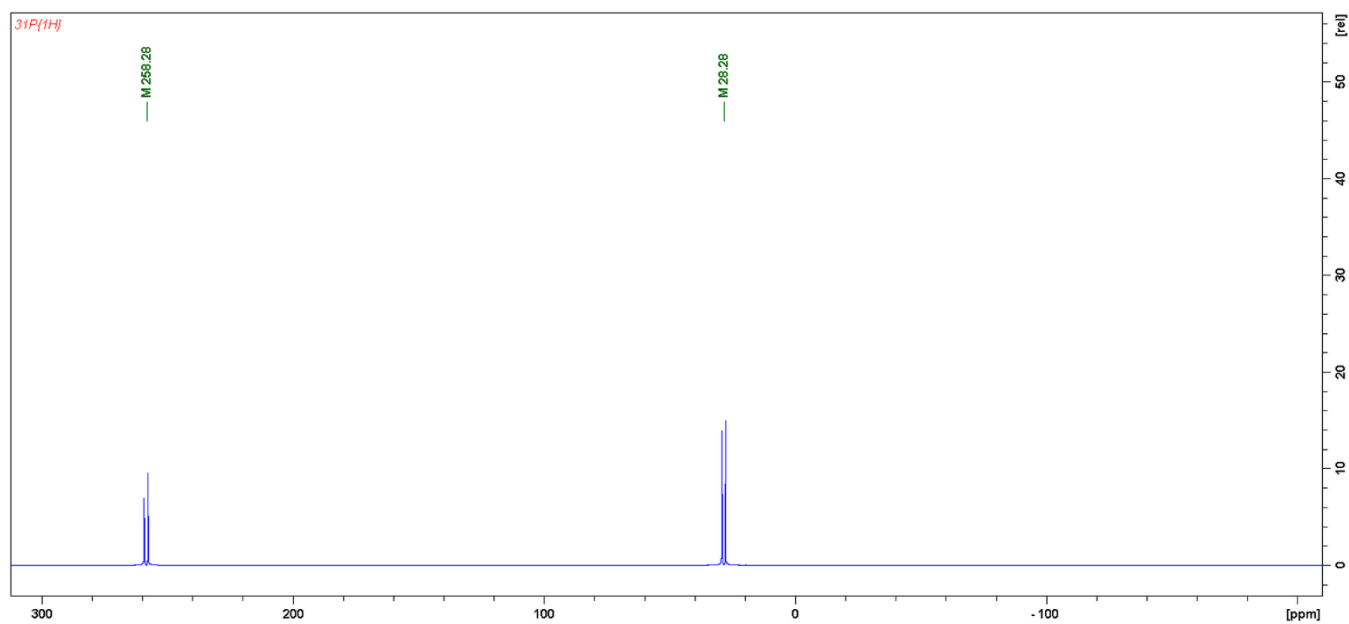

**Figure S79.**  $^{31}\text{P}\{^1\text{H}\}$  NMR (400 MHz,  $\text{C}_6\text{D}_6$ , 298 K) spectrum of isolated  $(4\text{-MeO-Ph})_2\text{C}=\text{P-P}t\text{Bu}_2$  (**3e**).

- 258.28 ppm, (d),  $J_{\text{P-P}} = 228.9$  Hz,  $(4\text{-MeO-Ph})_2\text{C}=\text{P-P}t\text{Bu}_2$ ;
- 28.28 ppm, (d),  $J_{\text{P-P}} = 228.9$  Hz,  $(4\text{-MeO-Ph})_2\text{C}=\text{P-P}t\text{Bu}_2$ ;



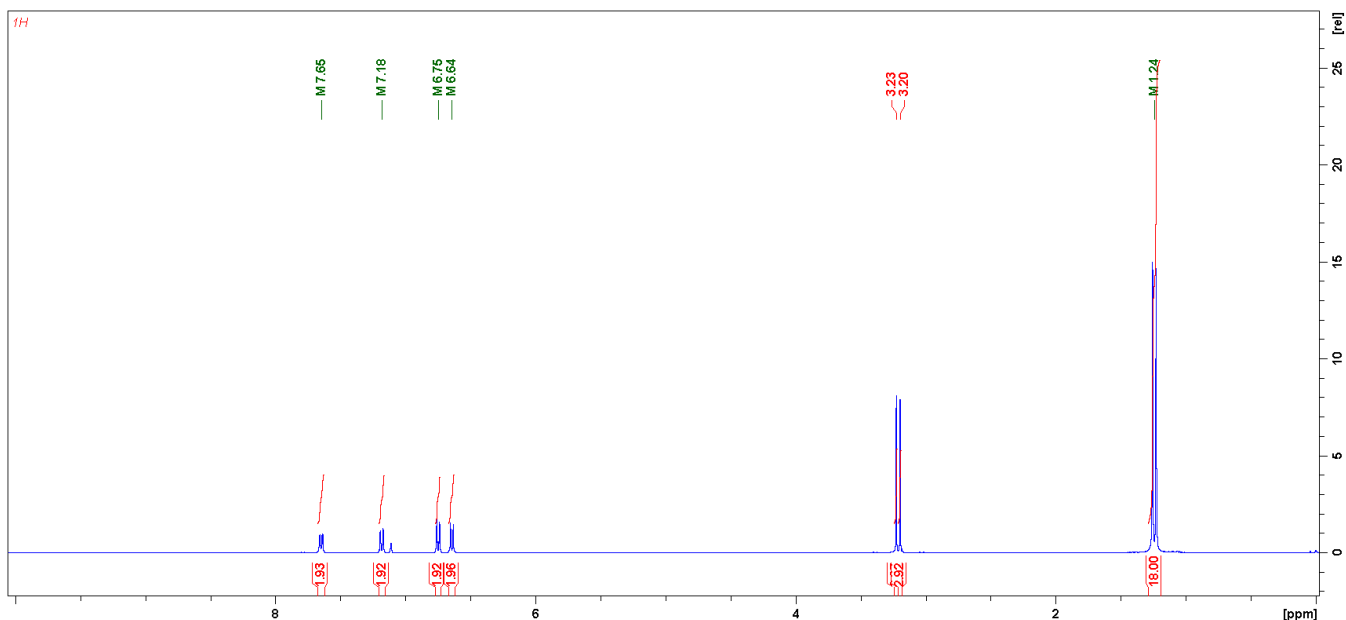

**Figure S80.**  $^1\text{H}$  NMR (400 MHz,  $\text{C}_6\text{D}_6$ , 298 K) spectrum of isolated  $(4\text{-MeO-Ph})_2\text{C}=\text{P-PtBu}_2$  (**3e**).

- 7.65 ppm, (dd), 2H,  $J_{\text{P-H}} = 8.9$  Hz,  $J_{\text{P-H}} = 2.69$  Hz,  $(4\text{-MeO-Ph})_2\text{C}=\text{P-PtBu}_2$  (*o*- $\text{H}_{\text{Ar}}$ );
- 7.18 ppm, (dd), 2H,  $J_{\text{P-H}} = 8.9$  Hz,  $J_{\text{P-H}} = 1.13$  Hz,  $(4\text{-MeO-Ph})_2\text{C}=\text{P-PtBu}_2$  (*o*- $\text{H}_{\text{Ar}}$ );
- 6.75 ppm, (d), 2H,  $J_{\text{P-H}} = 8.7$  Hz,  $(4\text{-MeO-Ph})_2\text{C}=\text{P-PtBu}_2$  (*m*- $\text{H}_{\text{Ar}}$ );
- 6.64 ppm, (d), 2H,  $J_{\text{P-H}} = 9.3$  Hz,  $(4\text{-MeO-Ph})_2\text{C}=\text{P-PtBu}_2$  (*m*- $\text{H}_{\text{Ar}}$ );
- 3.23 ppm, (s), 3H,  $(4\text{-MeO-Ph})_2\text{C}=\text{P-PtBu}_2$ ;
- 3.20 ppm, (s), 3H,  $(4\text{-MeO-Ph})_2\text{C}=\text{P-PtBu}_2$ ;
- 1.24 ppm, (d), 18H,  $J_{\text{P-H}} = 11.8$  Hz,  $(4\text{-MeO-Ph})_2\text{C}=\text{P-PtBu}_2$ ;

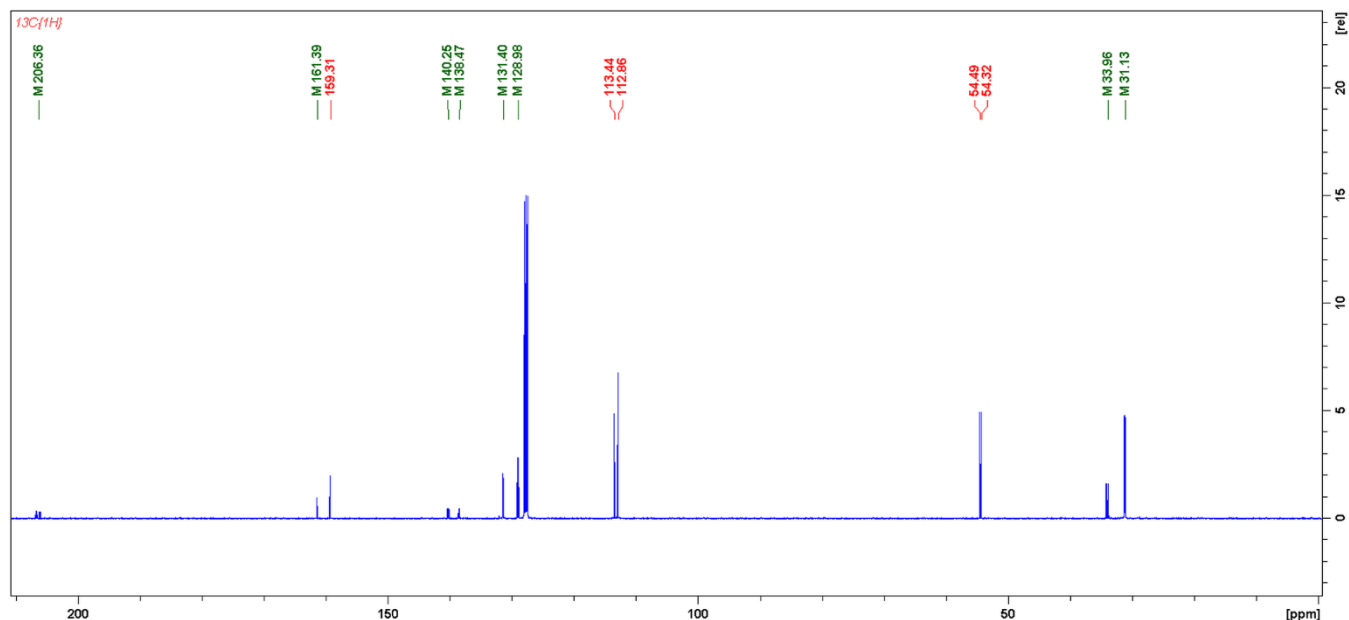

**Figure S81.**  $^{13}\text{C}\{^1\text{H}\}$  NMR (400 MHz,  $\text{C}_6\text{D}_6$ , 298 K) spectrum of isolated  $(4\text{-MeO-Ph})_2\text{C}=\text{P-PtBu}_2$  (**3e**).

- 206.36 ppm, (dd),  $J_{\text{P-C}} = 55.0$  Hz,  $J_{\text{P-C}} = 16.1$  Hz,  $(4\text{-MeO-Ph})_2\text{C}=\text{P-PtBu}_2$ ;
- 161.39 ppm, (d),  $J_{\text{P-C}} = 4.4$  Hz,  $(4\text{-MeO-Ph})_2\text{C}=\text{P-PtBu}_2$  (*i*- $\text{C}_{\text{Ar}}$ );
- 159.31 ppm, (s),  $(4\text{-MeO-Ph})_2\text{C}=\text{P-PtBu}_2$  (*i*- $\text{C}_{\text{Ar}}$ );
- 140.25 ppm, (dd),  $J_{\text{P-C}} = 24.2$  Hz,  $J_{\text{P-C}} = 4.4$  Hz,  $(4\text{-MeO-Ph})_2\text{C}=\text{P-PtBu}_2$  (*i*- $\text{C}_{\text{Ar}}$ );
- 138.47 ppm, (dd),  $J_{\text{P-C}} = 13.9$  Hz,  $J_{\text{P-C}} = 5.1$  Hz,  $(4\text{-MeO-Ph})_2\text{C}=\text{P-PtBu}_2$  (*i*- $\text{C}_{\text{Ar}}$ );
- 131.40 ppm, (dd),  $J_{\text{P-C}} = 5.8$  Hz,  $J_{\text{P-C}} = 4.5$  Hz,  $(4\text{-MeO-Ph})_2\text{C}=\text{P-PtBu}_2$  (*o*- $\text{C}_{\text{Ar}}$ );
- 128.98 ppm, (d),  $J_{\text{P-C}} = 19.8$  Hz,  $(4\text{-MeO-Ph})_2\text{C}=\text{P-PtBu}_2$  (*o*- $\text{C}_{\text{Ar}}$ );
- 113.44 ppm, (s),  $(4\text{-MeO-Ph})_2\text{C}=\text{P-PtBu}_2$  (*m*- $\text{C}_{\text{Ar}}$ );
- 112.86 ppm, (s),  $(4\text{-MeO-Ph})_2\text{C}=\text{P-PtBu}_2$  (*m*- $\text{C}_{\text{Ar}}$ );
- 54.49 ppm, (s),  $(4\text{-MeO-Ph})_2\text{C}=\text{P-PtBu}_2$ ;
- 54.32 ppm, (s),  $(4\text{-MeO-Ph})_2\text{C}=\text{P-PtBu}_2$ ;
- 33.96 ppm, (dd),  $J_{\text{P-C}} = 30.1$  Hz,  $J_{\text{P-C}} = 4.4$  Hz,  $(4\text{-MeO-Ph})_2\text{C}=\text{P-P}\{\text{C}(\text{CH}_3)\}_2$ ;
- 31.13 ppm, (dd),  $J_{\text{P-C}} = 14.7$  Hz,  $J_{\text{P-C}} = 5.1$  Hz,  $(4\text{-MeO-Ph})_2\text{C}=\text{P-P}\{\text{C}(\text{CH}_3)\}_2$ ;

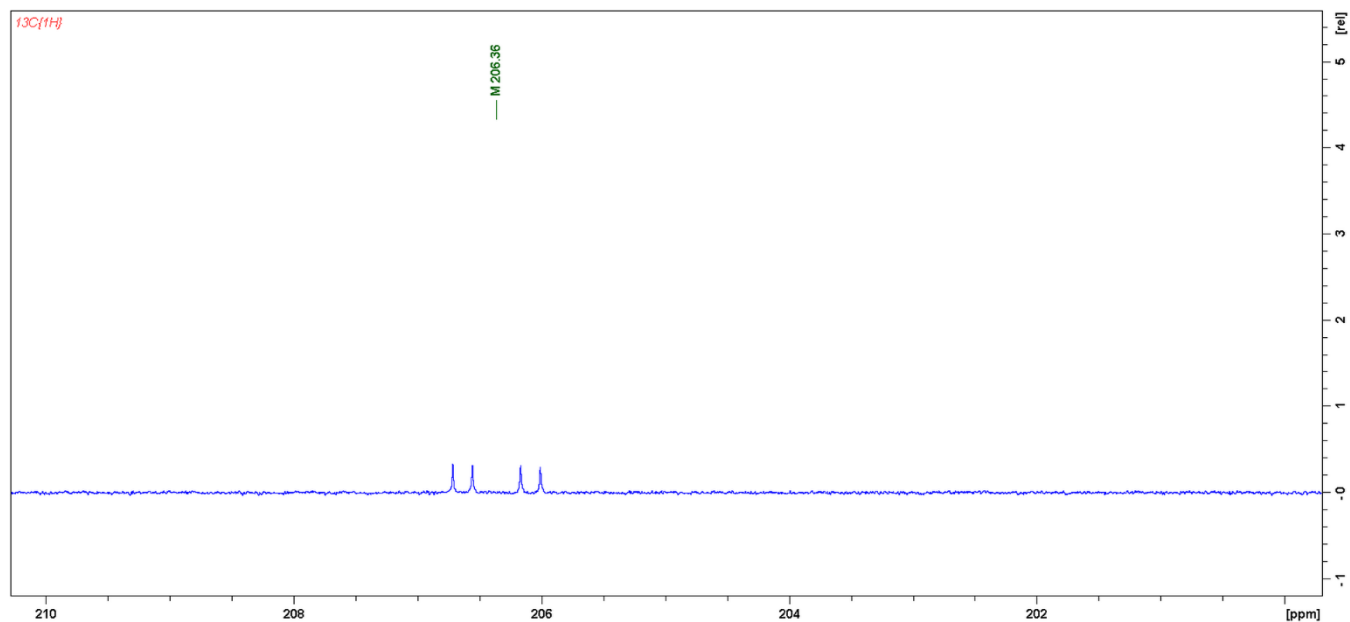

**Figure S82.**  $^{13}\text{C}\{^1\text{H}\}$  NMR (400 MHz,  $\text{C}_6\text{D}_6$ , 298 K) spectrum of isolated  $(4\text{-MeO-Ph})_2\text{C}=\text{P-P}t\text{Bu}_2$  (**3e**) in the range from 210 ppm to 200 ppm.

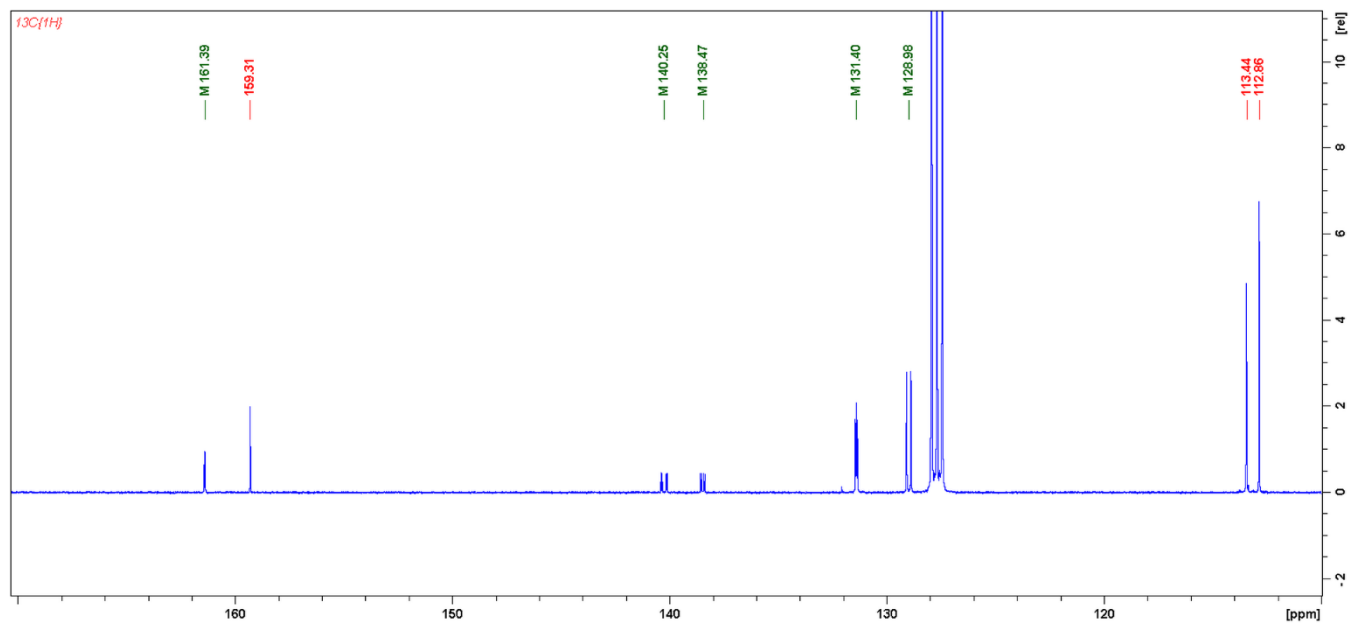

**Figure S83.**  $^{13}\text{C}\{^1\text{H}\}$  NMR (400 MHz,  $\text{C}_6\text{D}_6$ , 298 K) spectrum of isolated  $(4\text{-MeO-Ph})_2\text{C}=\text{P-P}t\text{Bu}_2$  (**3e**) in the range from 170 ppm to 110 ppm.

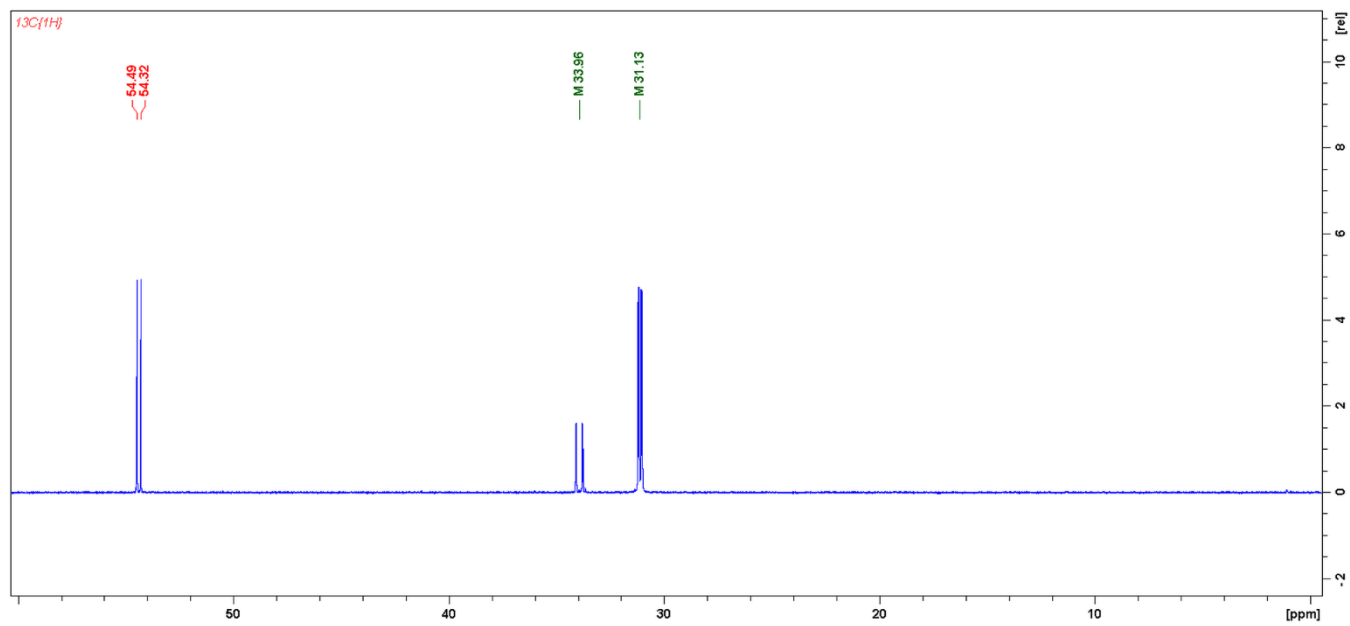

**Figure S84.**  $^{13}\text{C}\{^1\text{H}\}$  NMR (400 MHz,  $\text{C}_6\text{D}_6$ , 298 K) spectrum of isolated  $(4\text{-MeO-Ph})_2\text{C}=\text{P-P}t\text{Bu}_2$  (**3e**) in the range from 60 ppm to 0 ppm.

## B.2.6. *Tert*-butyl phenyl ketone

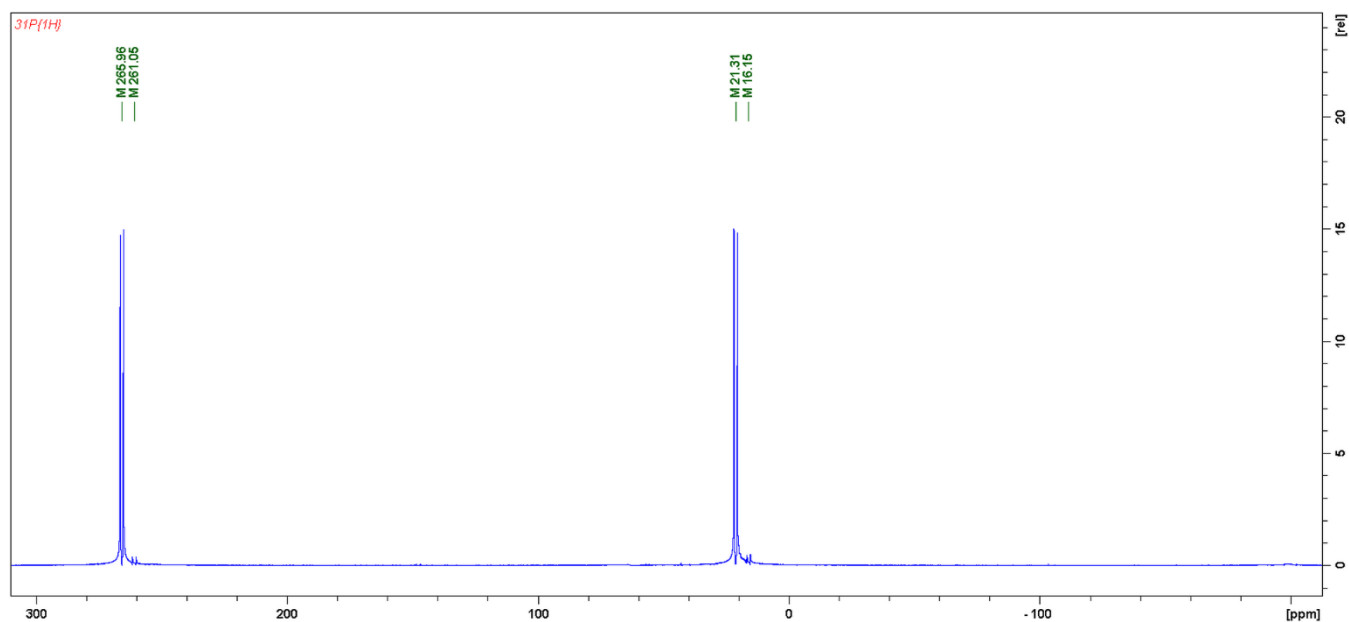

**Figure S85.**  $^{31}\text{P}\{^1\text{H}\}$  NMR (400 MHz, Toluene- $d_8$ , 298 K) spectrum of isolated  $t\text{Bu}(\text{Ph})\text{C}=\text{P}-\text{P}t\text{Bu}_2$  (**3f**).

- 265.96 ppm, (d),  $J_{\text{P-P}} = 216.9$  Hz,  $t\text{Bu}(\text{Ph})\text{C}=\text{P}-\text{P}t\text{Bu}_2$  – *Z* isomer;
- 261.05 ppm, (d),  $J_{\text{P-P}} = 230.4$  Hz,  $t\text{Bu}(\text{Ph})\text{C}=\text{P}-\text{P}t\text{Bu}_2$  – *E* isomer;
- 21.31 ppm, (d),  $J_{\text{P-P}} = 216.9$  Hz,  $t\text{Bu}(\text{Ph})\text{C}=\text{P}-\text{P}t\text{Bu}_2$  – *Z* isomer;
- 16.15 ppm, (d),  $J_{\text{P-P}} = 230.4$  Hz,  $t\text{Bu}(\text{Ph})\text{C}=\text{P}-\text{P}t\text{Bu}_2$  – *E* isomer;

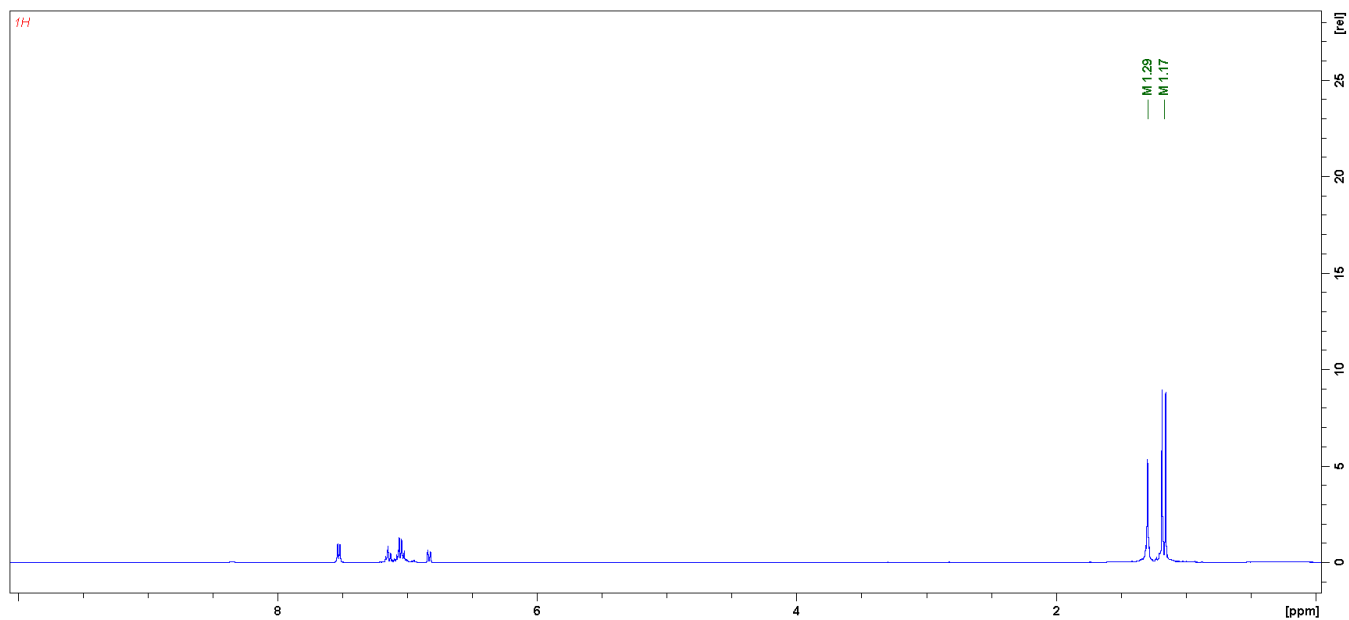

**Figure S86.**  $^1\text{H}$  NMR (400 MHz, Toluene- $d_8$ , 298 K) spectrum of of isolated  $t\text{Bu}(\text{Ph})\text{C}=\text{P}-\text{PtBu}_2$  (**3f**).

- 7.57 – 6.81 ppm, aromatic protons;
- 1.29 ppm, (d),  $J_{\text{P-H}} = 1.9$  Hz,  $t\text{Bu}(\text{Ph})\text{C}=\text{P}-\text{PtBu}_2$  – Z isomer;
- 1.17 ppm, (d),  $J_{\text{P-H}} = 10.7$  Hz,  $t\text{Bu}(\text{Ph})\text{C}=\text{P}-\text{PtBu}_2$  – Z isomer;

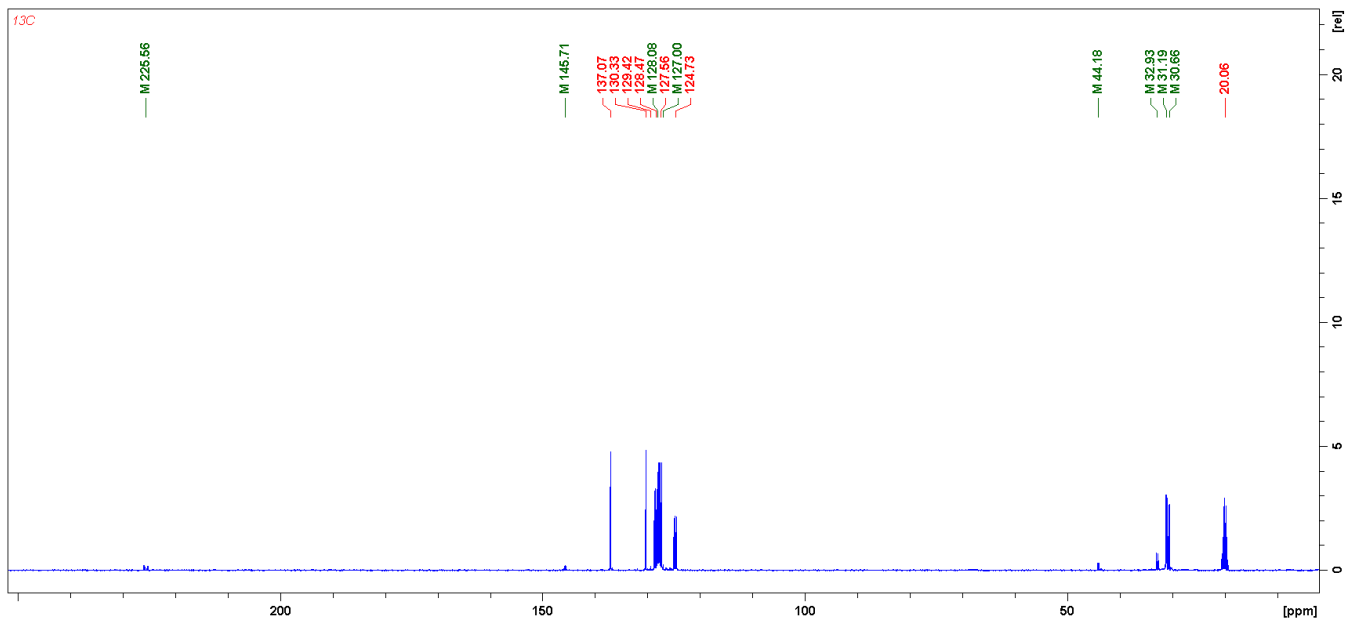

**Figure S87.**  $^{13}\text{C}\{^1\text{H}\}$  NMR (400 MHz, Toluene- $d_8$ , 298 K) spectrum of of isolated  $t\text{Bu}(\text{Ph})\text{C}=\text{P}-\text{P}t\text{Bu}_2$  (**3f**).

- 225.56 ppm, (dd),  $J_{\text{P-C}} = 62.0$  Hz,  $J_{\text{P-C}} = 16.5$  Hz,  $t\text{Bu}(\text{Ph})\text{C}=\text{P}-\text{P}t\text{Bu}_2$  – Z isomer;
- 145.71 ppm, (dd),  $J_{\text{P-C}} = 13.8$  Hz,  $J_{\text{P-C}} = 8.9$  Hz,  $t\text{Bu}(\text{Ph})\text{C}=\text{P}-\text{P}t\text{Bu}_2$  ( $i\text{-C}_{\text{Ar}}$ ) – Z isomer;
- 129.42 ppm, (s),  $t\text{Bu}(\text{Ph})\text{C}=\text{P}-\text{P}t\text{Bu}_2$  ( $p\text{-C}_{\text{Ar}}$ ) – Z isomer;
- 128.08 ppm, (dd),  $J_{\text{P-C}} = 8.2$  Hz,  $J_{\text{P-C}} = 2.7$  Hz,  $t\text{Bu}(\text{Ph})\text{C}=\text{P}-\text{P}t\text{Bu}_2$  ( $o\text{-C}_{\text{Ar}}$ ) – Z isomer;
- 127.00 ppm, (s),  $J_{\text{P-C}} = 3.6$  Hz,  $t\text{Bu}(\text{Ph})\text{C}=\text{P}-\text{P}t\text{Bu}_2$  ( $m\text{-C}_{\text{Ar}}$ ) – Z isomer;
- 44.18 ppm, (dd),  $J_{\text{P-C}} = 21.6$  Hz,  $J_{\text{P-C}} = 3.2$  Hz,  $\{(\text{CH}_3)_3\text{C}\}(\text{Ph})\text{C}=\text{P}-\text{P}\{\text{C}(\text{CH}_3)_3\}_2$  – Z isomer;
- 32.93 ppm, (dd),  $J_{\text{P-C}} = 30.2$  Hz,  $J_{\text{P-C}} = 5.0$  Hz,  $\{(\text{CH}_3)_3\text{C}\}(\text{Ph})\text{C}=\text{P}-\text{P}\{\text{C}(\text{CH}_3)_3\}_2$  – Z isomer;
- 31.19 ppm, (dd),  $J_{\text{P-C}} = 14.53$  Hz,  $J_{\text{P-C}} = 5.3$  Hz,  $\{(\text{CH}_3)_3\text{C}\}(\text{Ph})\text{C}=\text{P}-\text{P}\{\text{C}(\text{CH}_3)_3\}_2$  – Z isomer;
- 30.66 ppm, (d),  $J_{\text{P-C}} = 15.0$  Hz,  $\{(\text{CH}_3)_3\text{C}\}(\text{Ph})\text{C}=\text{P}-\text{P}\{\text{C}(\text{CH}_3)_3\}_2$  – Z isomer;

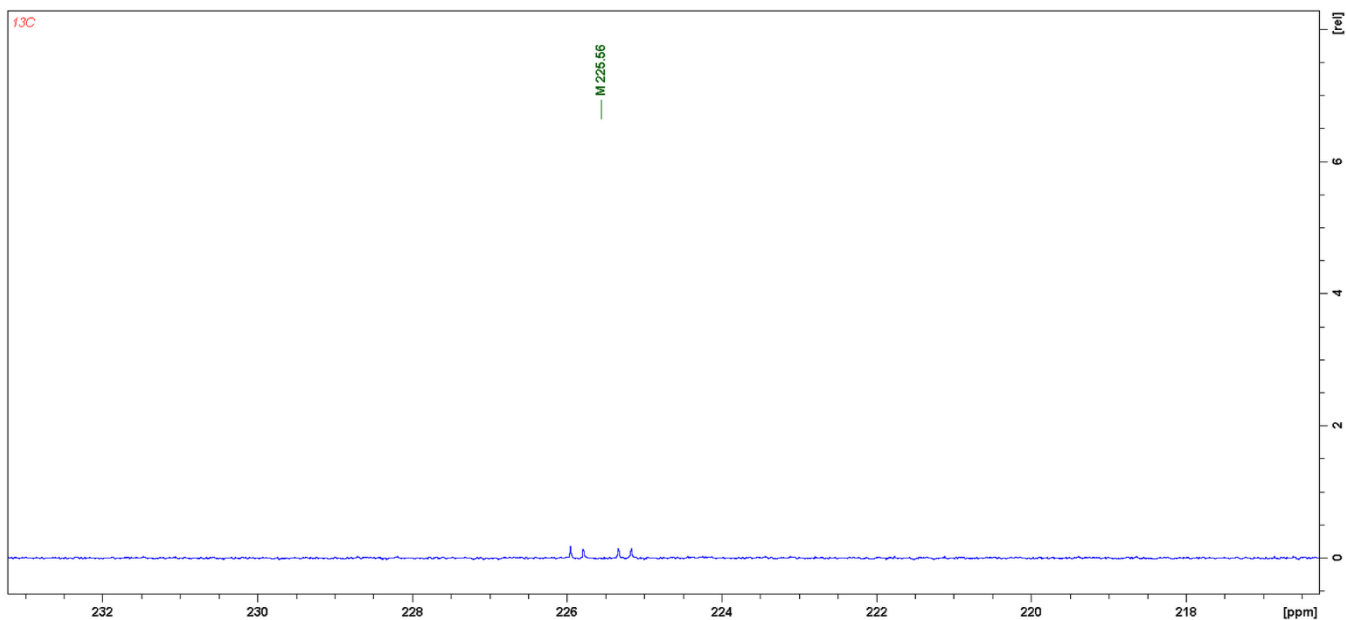

**Figure S88.**  $^{13}\text{C}\{^1\text{H}\}$  NMR (400 MHz, Toluene- $d_8$ , 298 K) spectrum of of isolated  $t\text{Bu}(\text{Ph})\text{C}=\text{P}-\text{P}t\text{Bu}_2$  (**3f**) in the range from 235 ppm to 210 ppm.

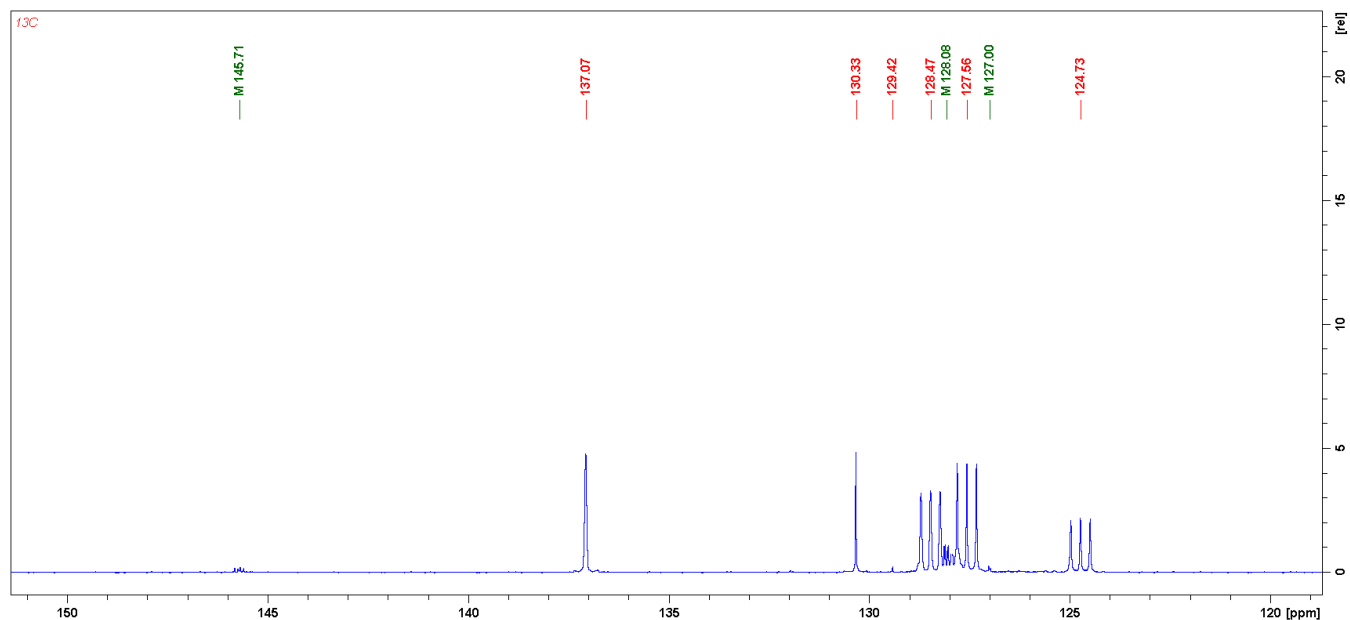

**Figure S89.**  $^{13}\text{C}\{^1\text{H}\}$  NMR (400 MHz, Toluene- $d_8$ , 298 K) spectrum of of isolated  $t\text{Bu}(\text{Ph})\text{C}=\text{P}-\text{P}t\text{Bu}_2$  (**3f**) in the range from 140 ppm to 120 ppm.

- 127.07, 130.33 128.47, 127.56, 124.73 ppm, toluene- $d_8$ ;

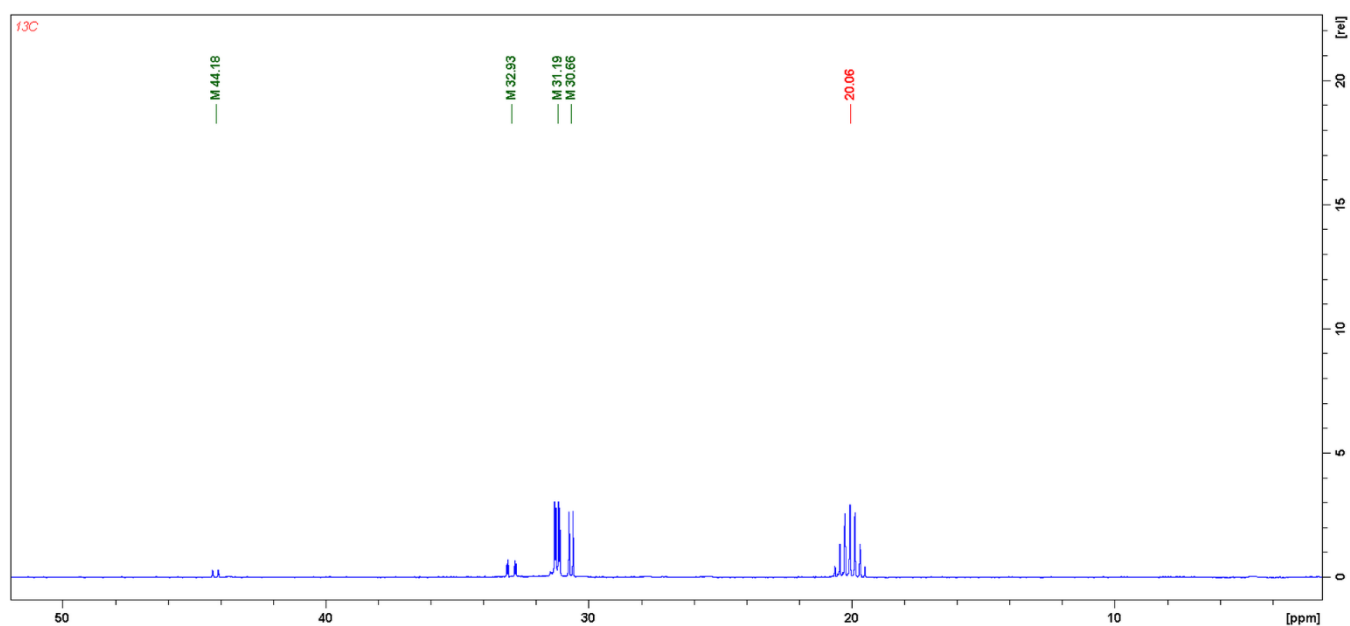

**Figure S90.**  $^{13}\text{C}\{^1\text{H}\}$  NMR (400 MHz, Toluene- $d_8$ , 298 K) spectrum of of isolated  $t\text{Bu}(\text{Ph})\text{C}=\text{P}-\text{P}t\text{Bu}_2$  (**3f**) in the range from 50 ppm to 0 ppm.

- 20.06 ppm, methyl group of toluene- $d_8$ ;



## B.2.7. Acetone

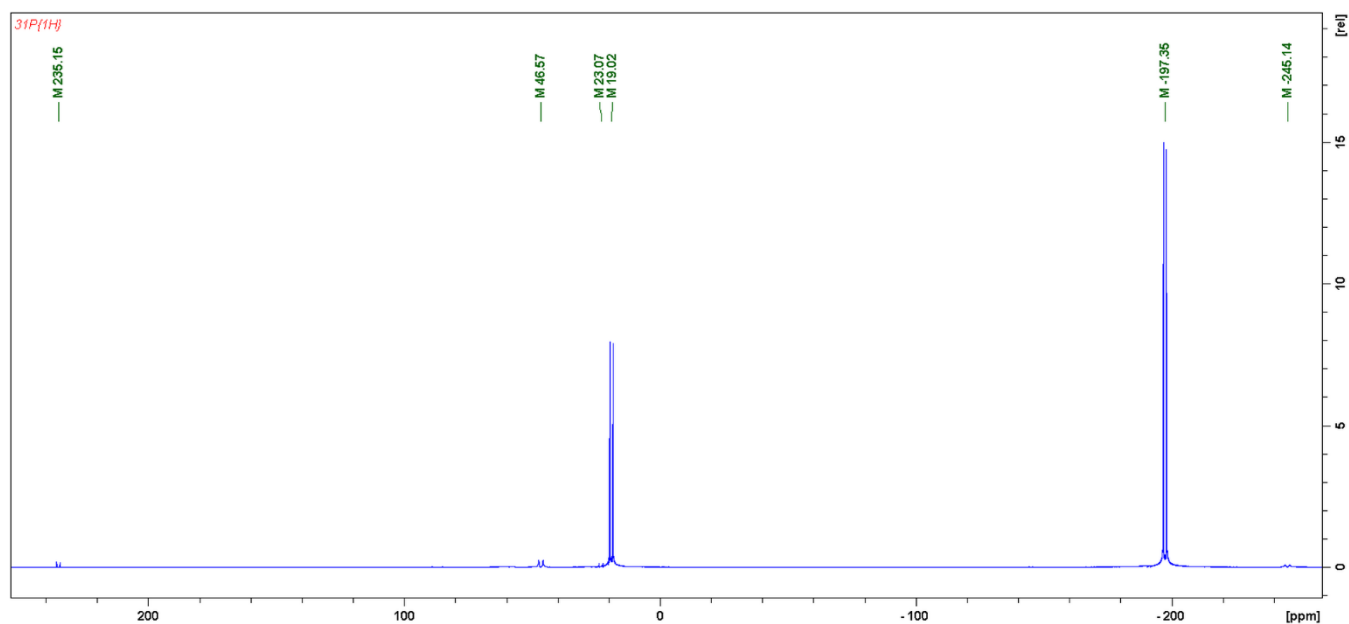

**Figure S91.**  $^{31}\text{P}\{^1\text{H}\}$  NMR (400 MHz, Toluene- $d_8$ , 298 K) spectrum of reaction mixture of **2** with acetone.

- 235.53 ppm, (d),  $J_{\text{P-P}} = 228.9$  Hz, (Me)<sub>2</sub>C=P-P*t*Bu<sub>2</sub>;
- 46.57 ppm, (d),  $J_{\text{P-P}} = 278.4$  Hz, *t*Bu<sub>2</sub>P-P(SiMe<sub>3</sub>)Li;
- 23.07 ppm, (d),  $J_{\text{P-P}} = 228.9$  Hz, (Me)<sub>2</sub>C=P-P*t*Bu<sub>2</sub>;
- 19.02 ppm, (d),  $J_{\text{P-P}} = 188.7$  Hz, *t*Bu<sub>2</sub>P-P(SiMe<sub>3</sub>)H;
- -197.35 ppm, (d),  $J_{\text{P-P}} = 188.7$  Hz, *t*Bu<sub>2</sub>P-P(SiMe<sub>3</sub>)H;
- -245.14 ppm, (d),  $J_{\text{P-P}} = 278.4$  Hz, *t*Bu<sub>2</sub>P-P(SiMe<sub>3</sub>)Li;

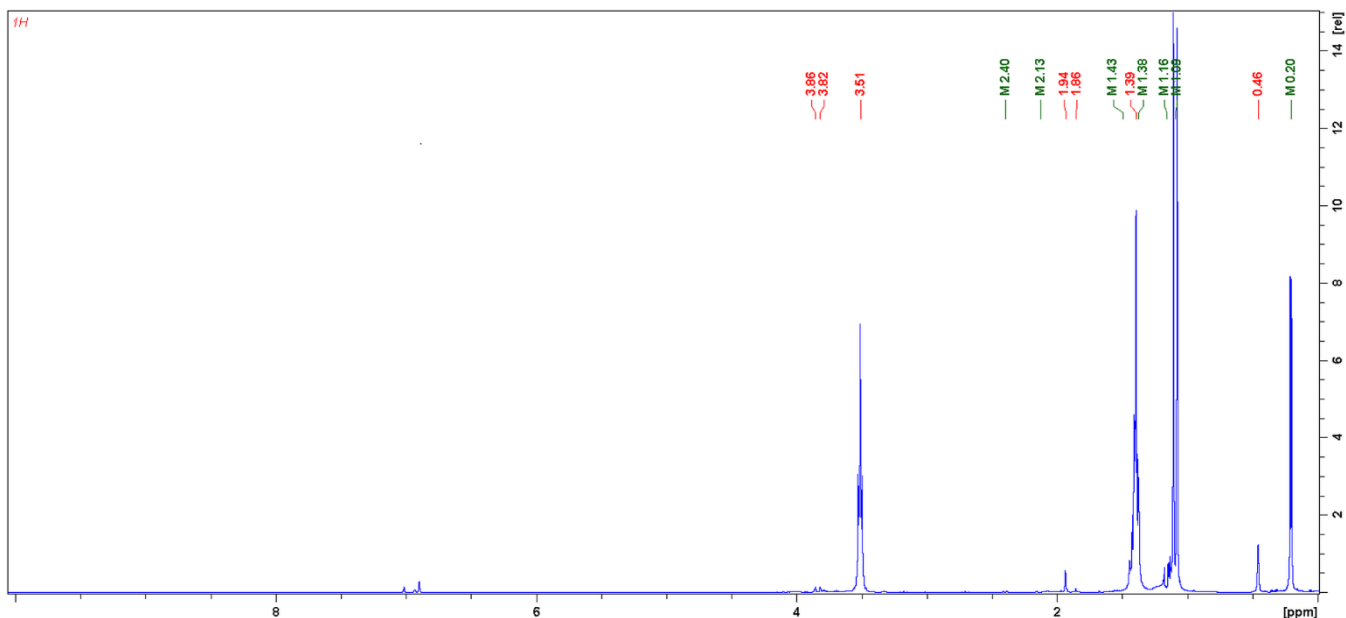

**Figure S92.**  $^1\text{H}$  NMR (400 MHz, Toluene- $d_8$ , 298 K) spectrum of reaction mixture of **2** with acetone.

- 3.86 ppm and 3.82 ppm (brad t),  $(\text{Me})(\text{CH}_2=)\text{C-OLi}(\text{THF})_3$ ;
- 3.51 ppm, THF;
- 2.40 ppm, (d), 3 H,  $J_{\text{P-H}} = 10.5$  Hz,  $(\text{Me})_2\text{C}=\text{P-P}t\text{Bu}_2$ ;
- 2.13 ppm, (d), 3 H,  $J_{\text{P-H}} = 20.4$  Hz,  $(\text{Me})_2\text{C}=\text{P-P}t\text{Bu}_2$ ;
- 1.94 ppm, (broad s), 3H,  $(\text{Me})(\text{CH}_2=)\text{C-OLi}(\text{THF})_3$ ;
- 1.86 ppm, (s),  $\text{Me}_2\text{C}=\text{O}$ ;
- 1.43 ppm, (broad d), 18 H,  $J_{\text{P-H}} = 10.4$  Hz,  $t\text{Bu}_2\text{P-P}(\text{SiMe}_3)\text{Li}$ ;
- 1.39 ppm, THF;
- 1.38 ppm, (dd), 1H,  $J_{\text{P-H}} = 187.2$  Hz,  $J_{\text{P-H}} = 2.5$  Hz,  $t\text{Bu}_2\text{P-P}(\text{SiMe}_3)\text{H}$ ;
- 1.16 ppm, (d), 18 H,  $J_{\text{P-H}} = 14.2$  Hz,  $(\text{Me})_2\text{C}=\text{P-P}t\text{Bu}_2$ ;
- 1.09 ppm, (dd) 18 H,  $J_{\text{P-H}} = 11.2$  Hz,  $J_{\text{P-H}} = 0.5$  Hz,  $t\text{Bu}_2\text{P-P}(\text{SiMe}_3)\text{H}$ ;
- 0.46 ppm, (broad s), 9 H,  $t\text{Bu}_2\text{P-P}(\text{SiMe}_3)\text{Li}$ ;
- 0.20 ppm, (dd) 9 H,  $J_{\text{P-H}} = 4.1$  Hz,  $J_{\text{P-H}} = 0.6$  Hz,  $t\text{Bu}_2\text{P-P}(\text{SiMe}_3)\text{H}$ ;

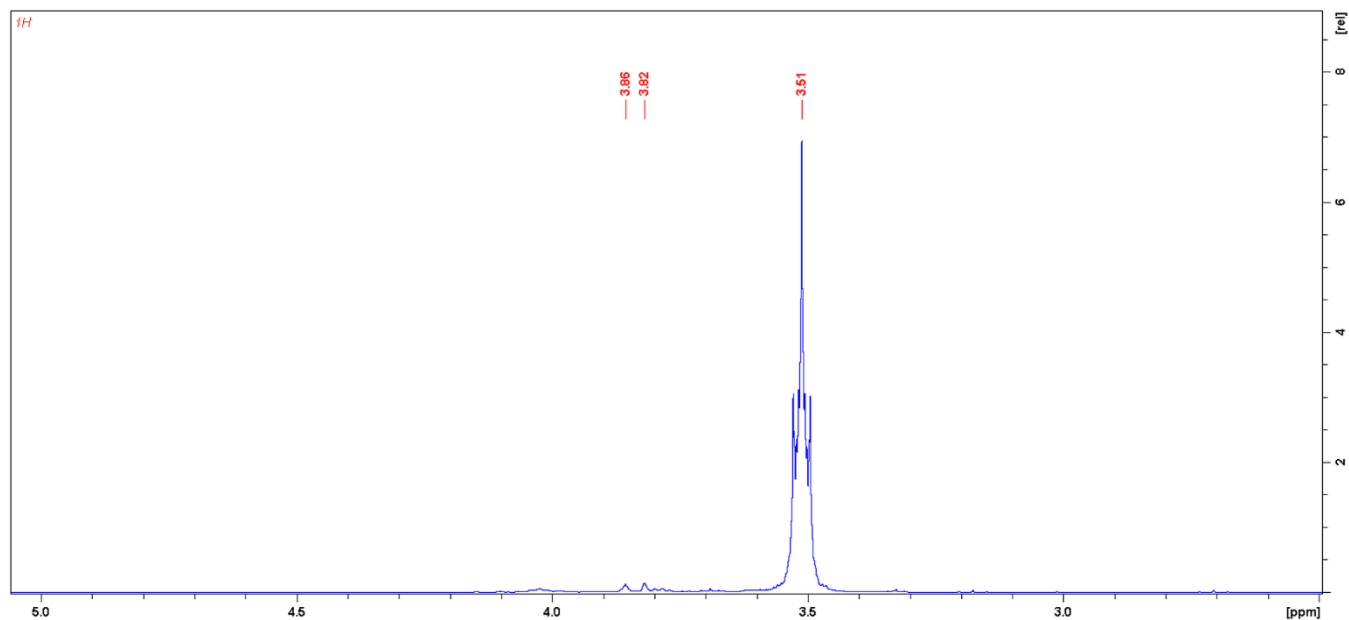

**Figure S93.** <sup>1</sup>H NMR (400 MHz, Toluene-d<sub>8</sub>, 298 K) spectrum of reaction mixture of **2** with acetone in the range from 5 ppm to 2 ppm.

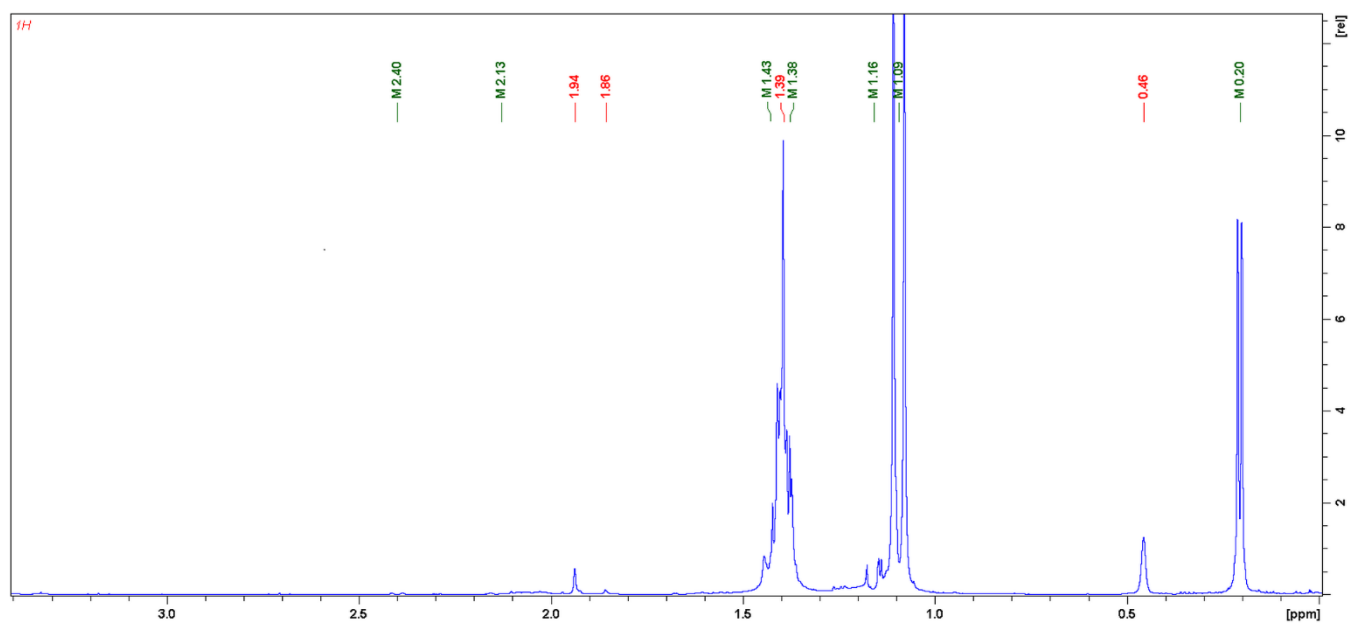

**Figure S94.** <sup>1</sup>H NMR (400 MHz, Toluene-d<sub>8</sub>, 298 K) spectrum of reaction mixture of **2** with acetone in the range from 3 ppm to 0 ppm.

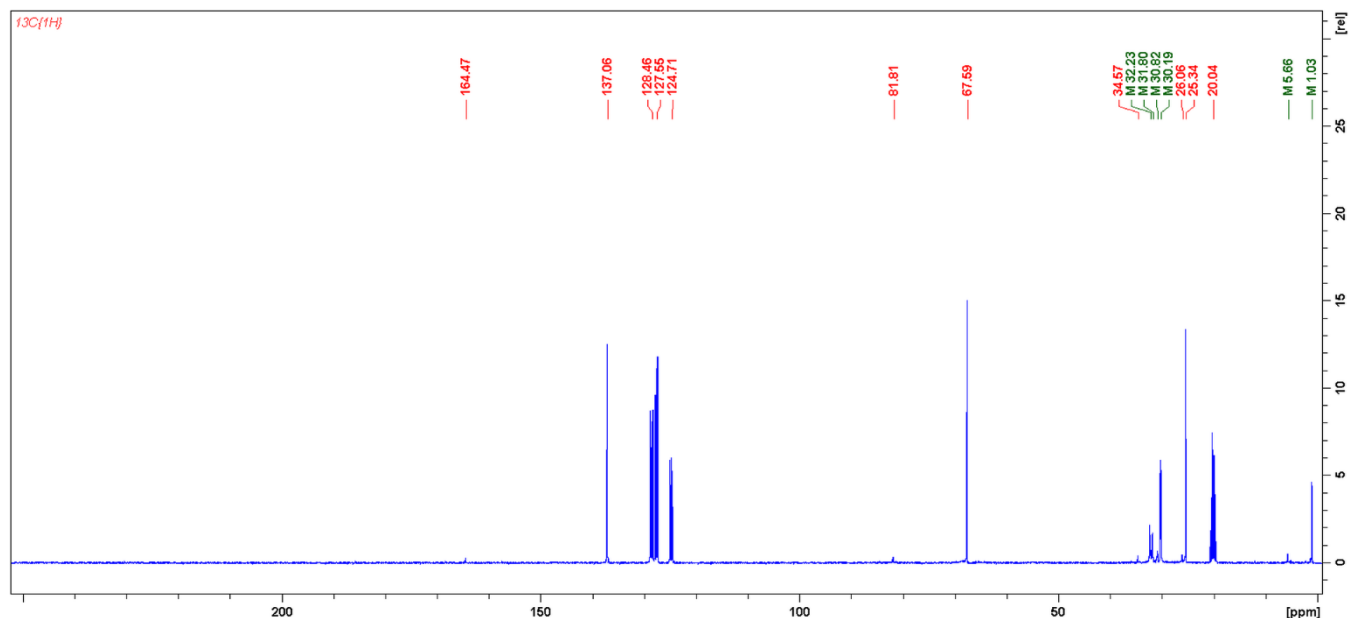

**Figure S95.**  $^{13}\text{C}\{^1\text{H}\}$  NMR (400 MHz, Toluene- $d_8$ , 298 K) spectrum of reaction mixture of **2** with acetone.

- 164.47 ppm, (s),  $(\text{Me})(\text{CH}_2=\text{C})\text{-OLi}(\text{THF})_3$ ;
- 137.06 ppm, 128.45 ppm, 127.55 ppm, 124.71 ppm and 20.03 ppm, Toluene- $d_8$ ;
- 81.81 ppm, (s),  $(\text{Me})(\text{CH}_2=\text{C})\text{-OLi}(\text{THF})_3$ ;
- 67.59 ppm, (s), THF;
- 34.57 ppm,  $\text{Me}_2\text{C}=\text{O}$
- 32.23 ppm, (broad dd),  $J_{\text{P-C}} = 29.8 \text{ Hz}$ ,  $J_{\text{P-C}} = 9.9 \text{ Hz}$ ,  $\{(\text{CH}_3)_3\text{C}\}\text{P-P}(\text{SiMe}_3)\text{Li}$ ;
- 31.80 ppm, (dd),  $J_{\text{P-C}} = 14.9 \text{ Hz}$ ,  $J_{\text{P-C}} = 2.5 \text{ Hz}$ ,  $\{(\text{CH}_3)_3\text{C}\}\text{P-P}(\text{SiMe}_3)\text{Li}$ ;
- 30.82 ppm, (broad dd),  $J_{\text{P-C}} = 22.4 \text{ Hz}$ ,  $J_{\text{P-C}} = 9.9 \text{ Hz}$ ,  $\{(\text{CH}_3)_3\text{C}\}\text{P-P}(\text{SiMe}_3)\text{H}$ ;
- 30.19 ppm, (dd),  $J_{\text{P-C}} = 14.9 \text{ Hz}$ ,  $J_{\text{P-C}} = 7.5 \text{ Hz}$ ,  $\{(\text{CH}_3)_3\text{C}\}\text{P-P}(\text{SiMe}_3)\text{H}$ ;
- 26.06 ppm, (s),  $(\text{Me})(\text{CH}_2=\text{C})\text{-OLi}(\text{THF})_3$ ;
- 25.34 ppm, (s), THF;
- 5.66 ppm, (broad dd),  $J_{\text{P-C}} = 9.9 \text{ Hz}$ ,  $J_{\text{P-C}} = 7.5 \text{ Hz}$ ,  $t\text{Bu}_2\text{P-P}(\text{SiMe}_3)\text{Li}$ ;
- 1.03 ppm, (dd),  $J_{\text{P-C}} = 9.9 \text{ Hz}$ ,  $J_{\text{P-C}} = 4.9 \text{ Hz}$ ,  $t\text{Bu}_2\text{P-P}(\text{SiMe}_3)\text{H}$ ;

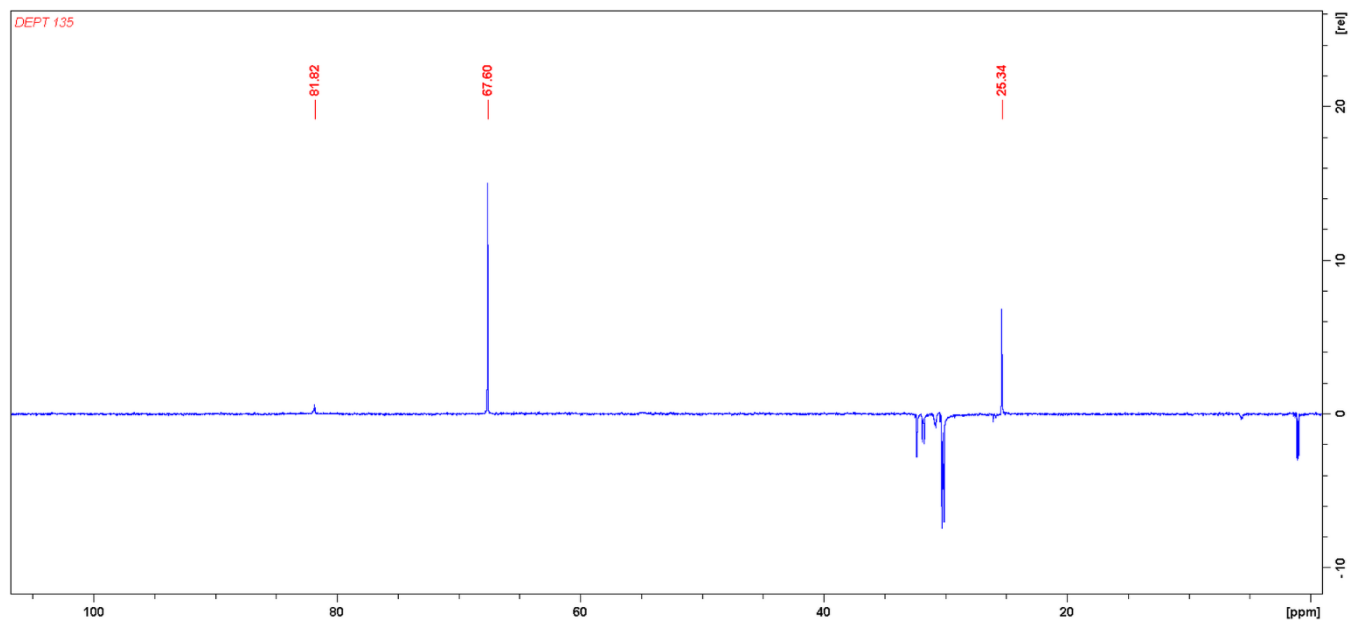

**Figure S96.**  $^{13}\text{C}\{^1\text{H}\}$  NMR-DEPT 135 (400 MHz, Toluene- $d_8$ , 298 K) spectrum of reaction mixture of **2** with acetone in the range from 100 ppm to 0 ppm.

## B.2.8. Cyclohexanone

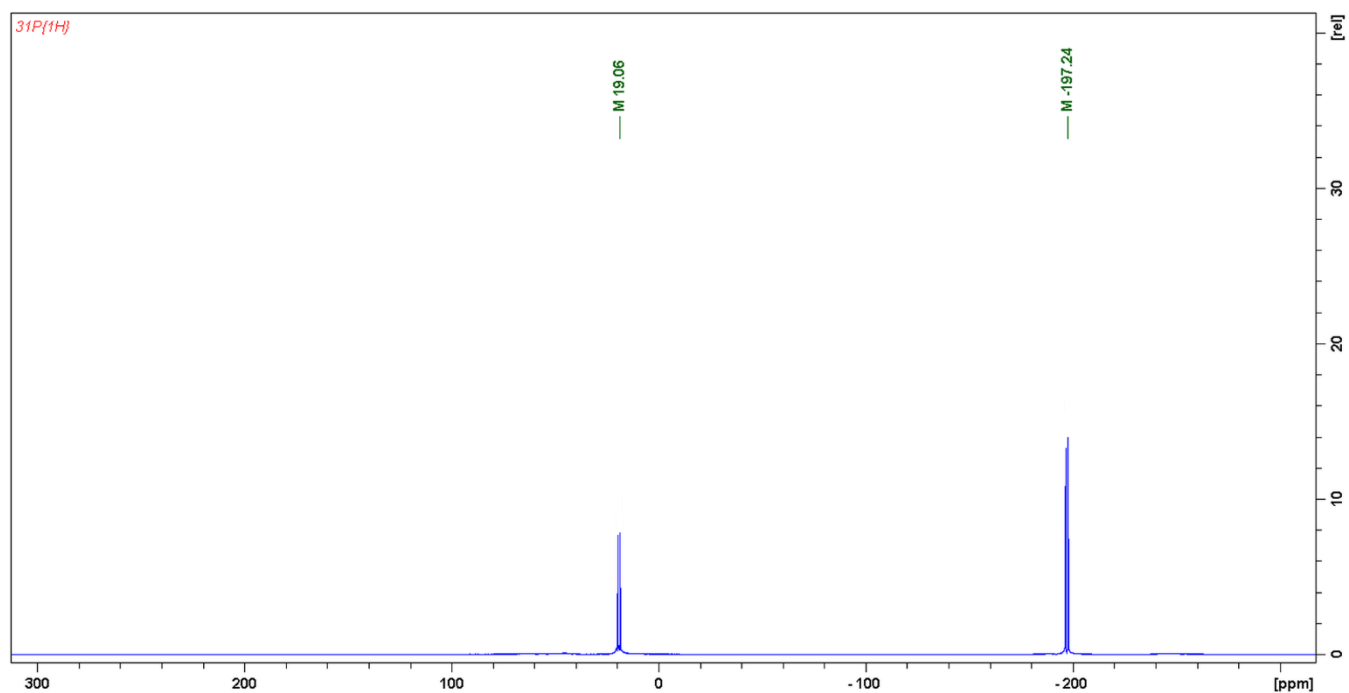

**Figure S97.**  $^{31}\text{P}\{^1\text{H}\}$  NMR (400 MHz, Toluene- $d_8$ , 298 K) spectrum of reaction mixture of **2** with cyclohexanone.

- 19.06 ppm, (d),  $J_{\text{P-P}} = 188.7$  Hz,  $t\text{Bu}_2\text{P-P}(\text{SiMe}_3)\text{H}$ ;
- -197.24 ppm, (d),  $J_{\text{P-P}} = 188.7$  Hz,  $t\text{Bu}_2\text{P-P}(\text{SiMe}_3)\text{H}$ ;

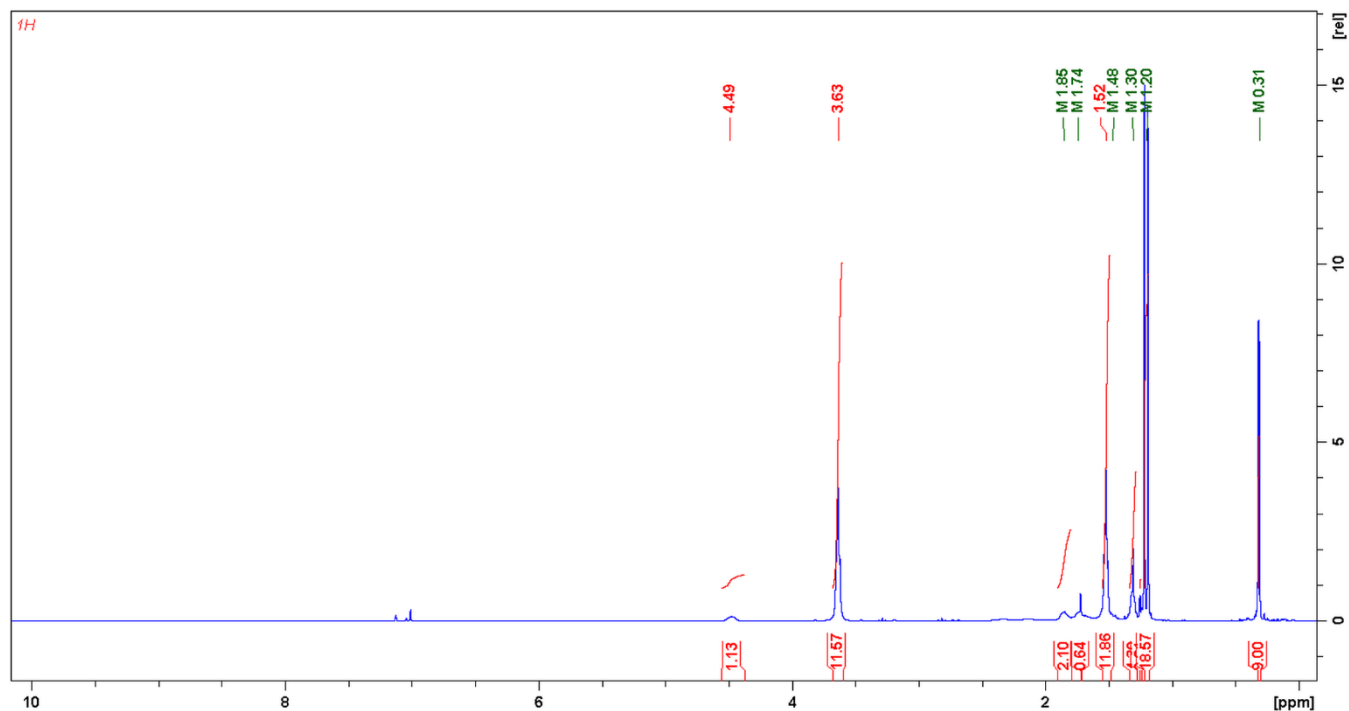

**Figure S98.** <sup>1</sup>H NMR (400 MHz, Toluene-d<sub>8</sub>, 298 K) spectrum of reaction mixture of **2** with cyclohexanone.

- 4.49 ppm, (broad s), (*cyclo*-CH<sub>2</sub>CH<sub>2</sub>CH<sub>2</sub>CH<sub>2</sub>CH=C)OLi(THF)<sub>3</sub>;
- 3.63 ppm and 1.52 ppm, (quintet), 24H, (*cyclo*-CH<sub>2</sub>CH<sub>2</sub>CH<sub>2</sub>CH<sub>2</sub>CH=C)OLi(THF)<sub>3</sub>;
- 1.85 ppm, (broad m), 2 H, (*cyclo*-CH<sub>2</sub>CH<sub>2</sub>CH<sub>2</sub>CH<sub>2</sub>CH=C)OLi(THF)<sub>3</sub>;
- 1.74 ppm, (broad m), 2H, (*cyclo*-CH<sub>2</sub>CH<sub>2</sub>CH<sub>2</sub>CH<sub>2</sub>CH=C)OLi(THF)<sub>3</sub>;
- 1.48 ppm, (dd), 1H,  $J_{P-H} = 188.4$  Hz,  $J_{P-H} = 2.5$  Hz, *t*Bu<sub>2</sub>P-P(SiMe<sub>3</sub>)H;
- 1.30 ppm, (broad m), 4H, (*cyclo*-CH<sub>2</sub>CH<sub>2</sub>CH<sub>2</sub>CH<sub>2</sub>CH=C)OLi(THF)<sub>3</sub>;
- 1.20 ppm, (d), 18H,  $J_{P-H} = 11.4$  Hz, *t*Bu<sub>2</sub>P-P(SiMe<sub>3</sub>)H;
- 0.31 ppm, (dd), 9H,  $J_{P-H} = 4.2$  Hz,  $J_{PH} = 0.6$  Hz, *t*Bu<sub>2</sub>P-P(SiMe<sub>3</sub>)H;

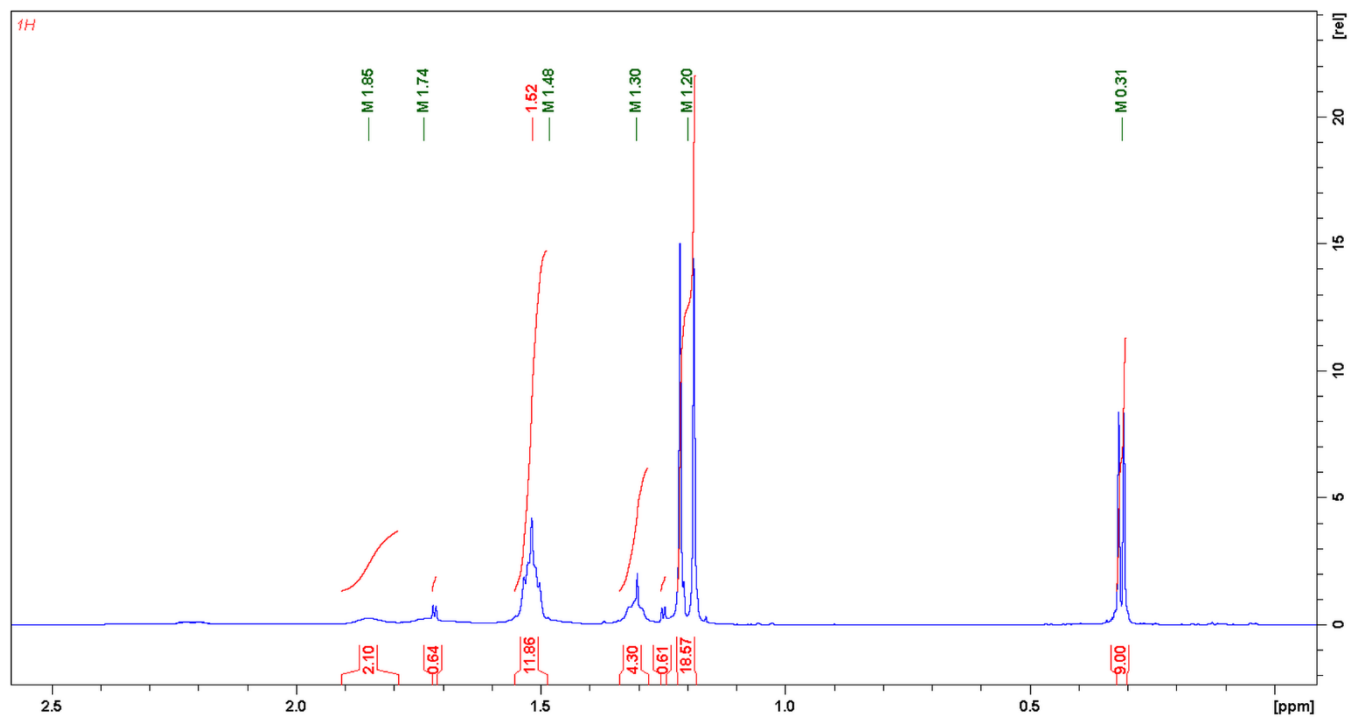

**Figure S99.**  $^1\text{H}$  NMR (400 MHz, Toluene- $d_8$ , 298 K) spectrum of reaction mixture of **2** with cyclohexanone in the range from 2.5 ppm to 0 ppm.



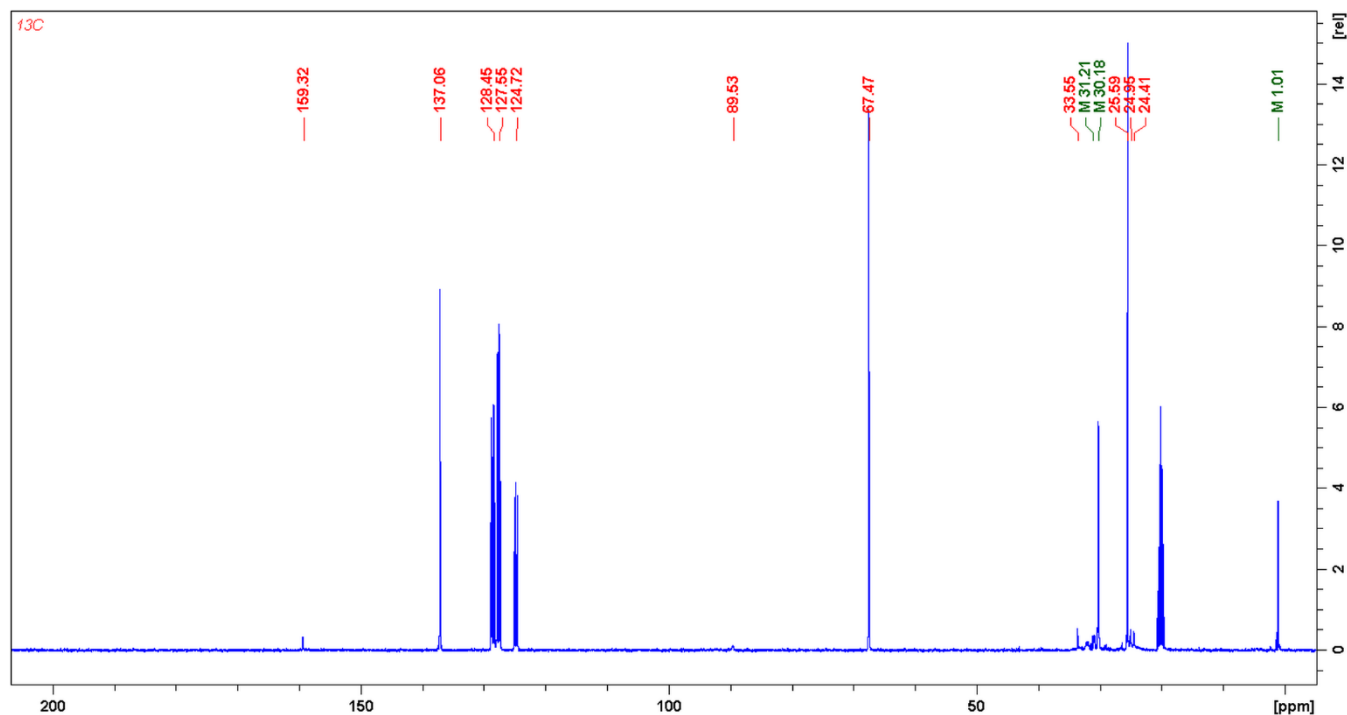

**Figure S100.**  $^{13}\text{C}\{^1\text{H}\}$  NMR (400 MHz, Toluene- $d_8$ , 298 K) spectrum of reaction mixture of **2** with cyclohexanone.

- 159.32 ppm, (s), (*cyclo*- $\text{CH}_2\text{CH}_2\text{CH}_2\text{CH}_2\text{CH}=\text{C}$ )OLi(THF) $_3$ ;
- 137.06, 128.45, 127.55, 20.03 ppm, toluene- $d_8$ ;
- 89.53 ppm, (broad s), (*cyclo*- $\text{CH}_2\text{CH}_2\text{CH}_2\text{CH}_2\text{CH}=\text{C}$ )OLi(THF) $_3$ ;
- 33.56 ppm, (s), (*cyclo*- $\text{CH}_2\text{CH}_2\text{CH}_2\text{CH}_2\text{CH}=\text{C}$ )OLi(THF) $_3$ ;
- 31.21 ppm, (dd),  $J_{\text{P-C}} = 32.3$  Hz,  $J_{\text{PC}} = 13.7$  Hz,  $\{(\text{CH}_3)_3\text{C}\}_2\text{P-P}(\text{SiMe}_3)\text{H}$ ;
- 30.18 ppm, (dd),  $J_{\text{P-C}} = 14.9$  Hz,  $J_{\text{PC}} = 6.2$  Hz,  $\{(\text{CH}_3)_3\text{C}\}_2\text{P-P}(\text{SiMe}_3)\text{H}$ ;
- 25.59 ppm, (s), (*cyclo*- $\text{CH}_2\text{CH}_2\text{CH}_2\text{CH}_2\text{CH}=\text{C}$ )OLi(THF) $_3$ ;
- 24.95 ppm, (s), (*cyclo*- $\text{CH}_2\text{CH}_2\text{CH}_2\text{CH}_2\text{CH}=\text{C}$ )OLi(THF) $_3$ ;
- 24.41 ppm, (s), (*cyclo*- $\text{CH}_2\text{CH}_2\text{CH}_2\text{CH}_2\text{CH}=\text{C}$ )OLi(THF) $_3$ ;
- 1.01 ppm, (dd),  $J_{\text{P-C}} = 9.9$  Hz,  $J_{\text{PC}} = 4.9$  Hz, *t*Bu $_2$ P-P(SiMe $_3$ )H;

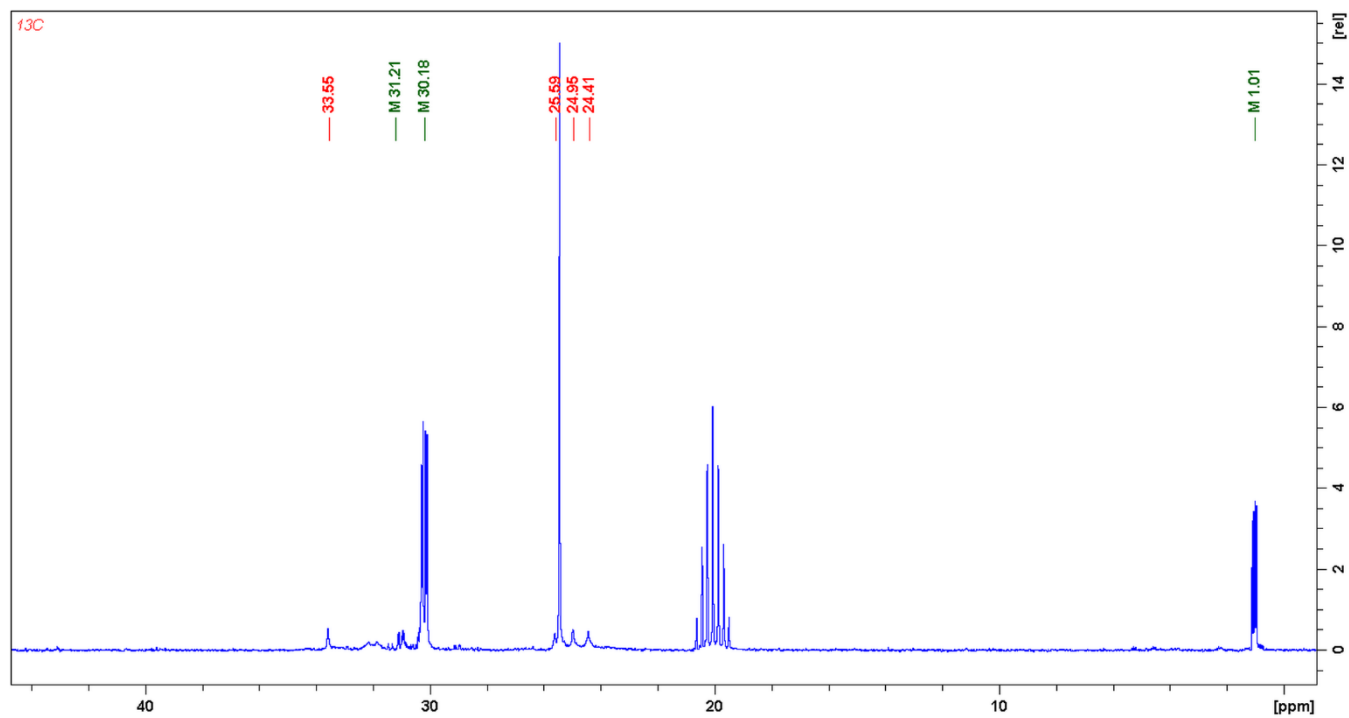

**Figure S101.**  $^{13}\text{C}\{^1\text{H}\}$  NMR (400 MHz, Toluene- $d_8$ , 298 K) spectrum of reaction mixture of **2** with cyclohexanone in the range from 45 ppm to 0 ppm.

## B.2.9. Acetophenone

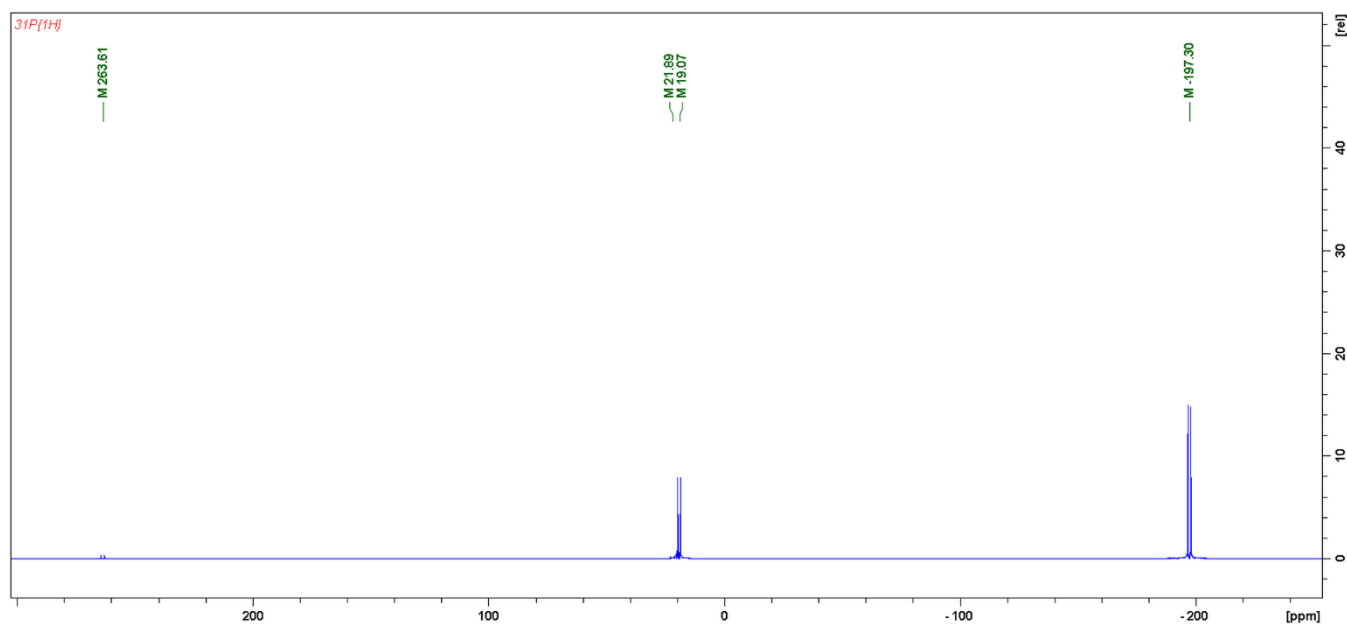

**Figure S102.**  $^{31}\text{P}\{^1\text{H}\}$  NMR (400 MHz, Toluene- $d_8$ , 298 K) spectrum of reaction mixture of **2** with acetophenone.

- 263.61 ppm, (d),  $J_{\text{P-P}} = 234.9$  Hz,  $(\text{Ph})\text{MeC}=\text{P}-\text{P}t\text{Bu}_2 - E$  isomer;
- 21.89 ppm, (d),  $J_{\text{P-P}} = 234.9$  Hz,  $(\text{Ph})\text{MeC}=\text{P}-\text{P}t\text{Bu}_2 - E$  isomer;
- 19.07 ppm, (d), 188.7 Hz,  $t\text{Bu}_2\text{P}-\text{P}(\text{SiMe}_3)\text{H}$ ;
- -197.30 ppm, (d), 188.7 Hz,  $t\text{Bu}_2\text{P}-\text{P}(\text{SiMe}_3)\text{H}$ ;

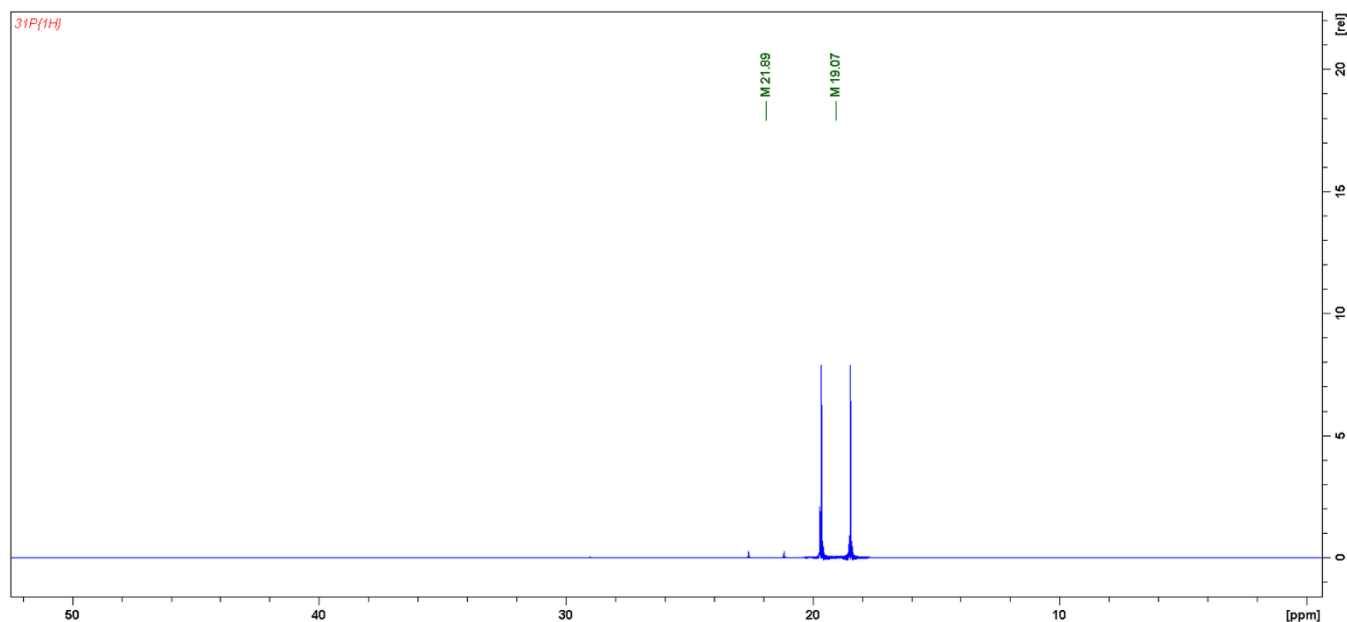

**Figure S103.**  $^{31}\text{P}\{^1\text{H}\}$  NMR (400 MHz, Toluene- $d_8$ , 298 K) spectrum of reaction mixture of **2** with acetophenone in the range from 50 ppm to 0 ppm.

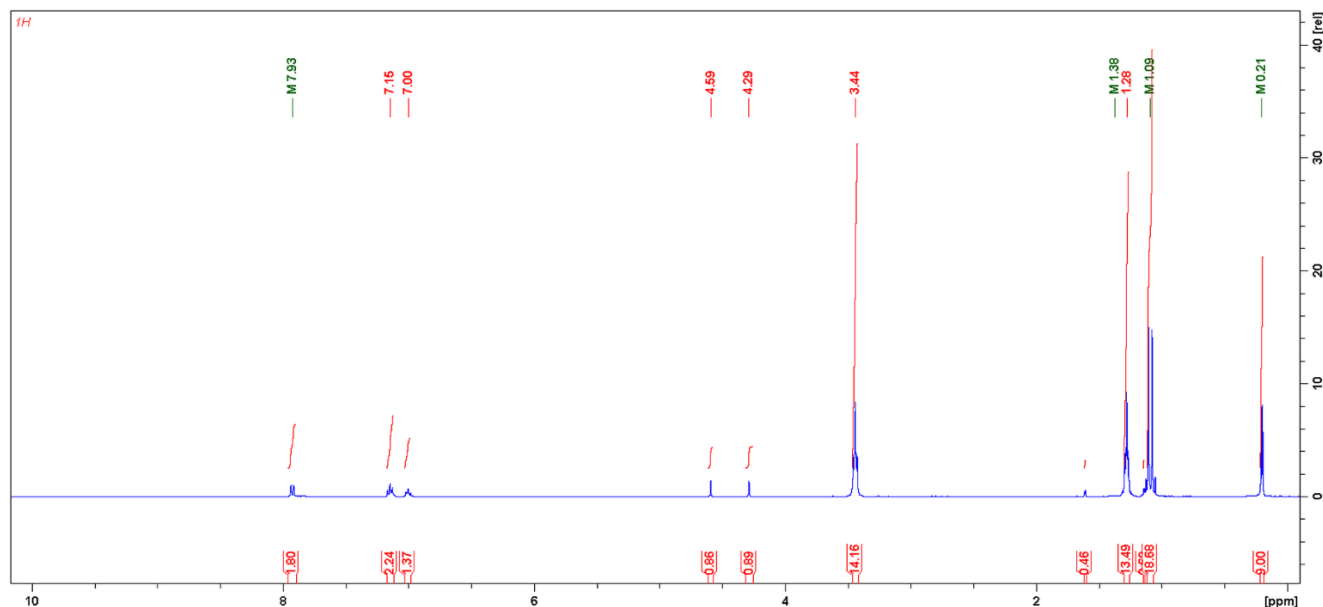

**Figure S104.**  $^1\text{H}$  NMR (400 MHz, Toluene- $d_8$ , 298 K) spectrum of reaction mixture of **2** with acetophenone.

- 7.93 ppm, (dd), 2H,  $J_{\text{H-H}} = 9.2$  Hz,  $J_{\text{H-H}} = 1.1$  Hz, **(Ph)**(CH<sub>2</sub>=)C-OLi(THF)<sub>3</sub>, (*m*-H<sub>Ar</sub>);
- 7.15 ppm, (t), 2H,  $J_{\text{H-H}} = 7.5$  Hz, **(Ph)**(CH<sub>2</sub>=)C-OLi(THF)<sub>3</sub>, (*o*-H<sub>Ar</sub>);
- 7.00 ppm, (t), 1H,  $J_{\text{H-H}} = 7.5$  Hz, **(Ph)**(CH<sub>2</sub>=)C-OLi(THF)<sub>3</sub>, (*p*-H<sub>Ar</sub>);
- 4.59 ppm and 4.29 ppm, (s), 2H, **(Ph)**(CH<sub>2</sub>=)C-OLi(THF)<sub>3</sub>;
- 3.44 ppm and 1.28 ppm, (quintet), 24H of 3 THF molecules;
- 1.38 ppm, (dd), 1H,  $J_{\text{P-H}} = 187.2$  Hz,  $J_{\text{P-H}} = 2.4$  Hz, *t*Bu<sub>2</sub>P-P(SiMe<sub>3</sub>)H;
- 1.09 ppm, (d), 18H,  $J_{\text{P-H}} = 11.2$  Hz, *t*Bu<sub>2</sub>P-P(SiMe<sub>3</sub>)H;
- 0.21 ppm, (d), 9H,  $J_{\text{P-H}} = 4.2$  Hz, *t*Bu<sub>2</sub>P-P(SiMe<sub>3</sub>)H;

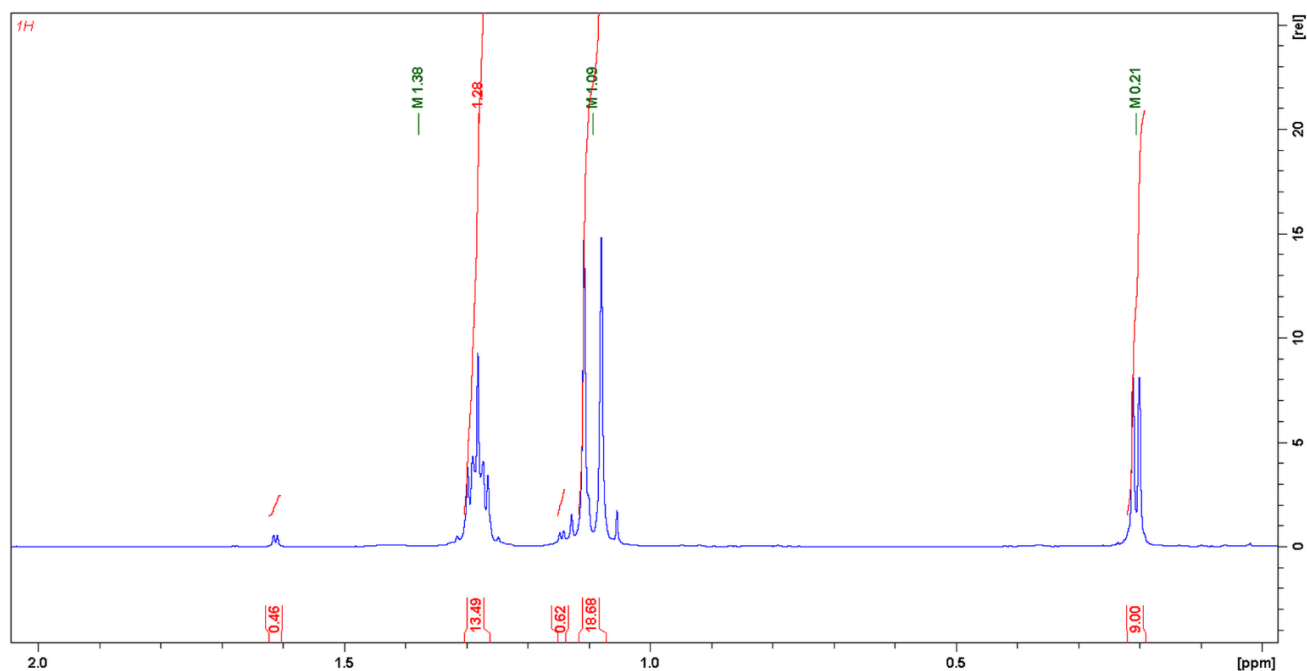

**Figure S105.**  $^1\text{H}$  NMR (400 MHz, Toluene- $d_8$ , 298 K) spectrum of reaction mixture of **2** with acetophenone in the range from 2 ppm to 0 ppm.

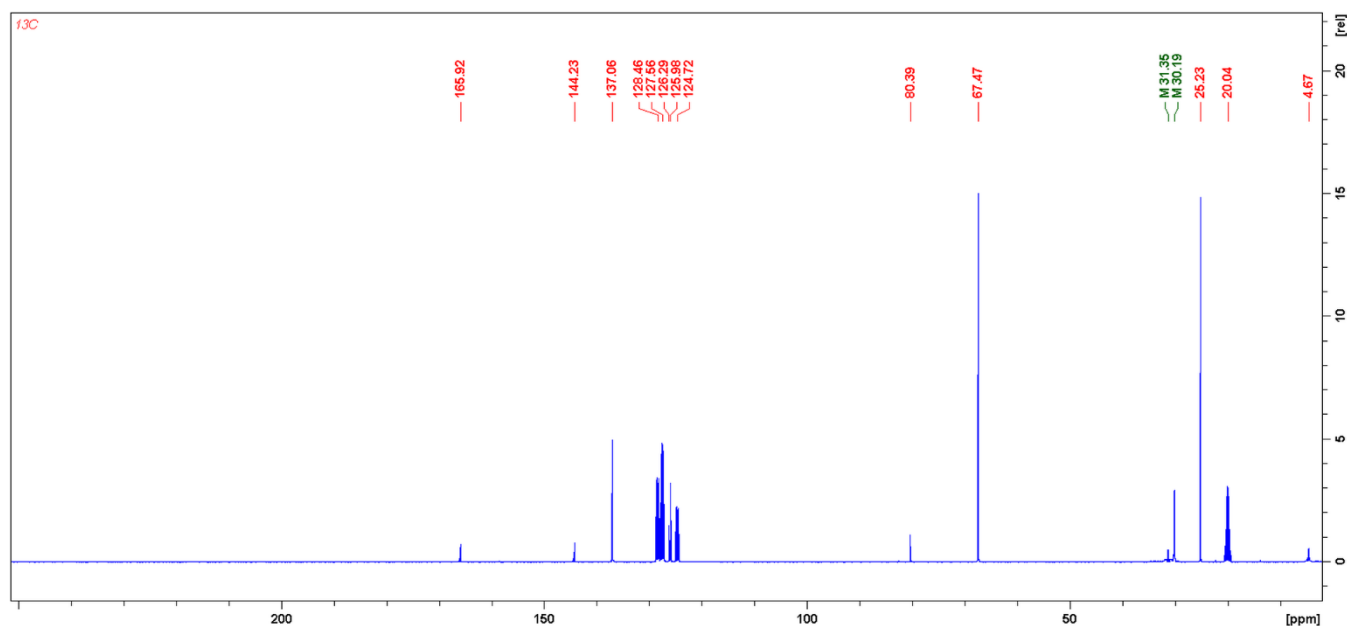

**Figure S106.**  $^{13}\text{C}\{^1\text{H}\}$  NMR (400 MHz, Toluene- $d_8$ , 298 K) spectrum of reaction mixture of **2** with acetophenone.

- 165.92 ppm, (s),  $(\text{Ph})(\text{CH}_2=)\text{C-OLi}(\text{THF})_3$ , ( $i\text{-C}_{\text{Ar}}$ );
- 144.23 ppm, (s),  $(\text{Ph})(\text{CH}_2=)\text{C-OLi}(\text{THF})_3$ , ( $i\text{-C}_{\text{Ar}}$ );
- 127.56 ppm, (s),  $(\text{Ph})(\text{CH}_2=)\text{C-OLi}(\text{THF})_3$ , ( $o\text{-C}_{\text{Ar}}$ );
- 126.29 ppm, (s),  $(\text{Ph})(\text{CH}_2=)\text{C-OLi}(\text{THF})_3$ , ( $p\text{-C}_{\text{Ar}}$ );
- 125.98 ppm, (s),  $(\text{Ph})(\text{CH}_2=)\text{C-OLi}(\text{THF})_3$ , ( $m\text{-C}_{\text{Ar}}$ );
- 80.39 ppm, (s)  $(\text{Ph})(\text{CH}_2=)\text{C-OLi}(\text{THF})_3$ ;
- 67.47 ppm and 25.23 ppm,  $(\text{Ph})(\text{CH}_2=)\text{C-OLi}(\text{THF})_3$ ;
- 137.06, 128.46, 127.56, 124.72 and 20.04 ppm, Toluene- $d_8$ ;
- 31.35 ppm, (dd),  $J_{\text{P-C}} = 34.2$  Hz,  $J_{\text{P-C}} = 5.9$  Hz,  $\{(\text{CH}_3)\text{C}\}_2\text{P-P}(\text{SiMe}_3)\text{H}$ ;
- 30.19 ppm, (dd),  $J_{\text{P-C}} = 14.5$  Hz,  $J_{\text{P-C}} = 5.5$  Hz,  $\{(\text{CH}_3)\text{C}\}_2\text{P-P}(\text{SiMe}_3)\text{H}$ ;
- 4.67 ppm, (dd),  $J_{\text{P-C}} = 10.4$  Hz,  $J_{\text{P-C}} = 5.2$  Hz,  $\{(\text{CH}_3)\text{C}\}_2\text{P-P}(\text{SiMe}_3)\text{H}$ ;

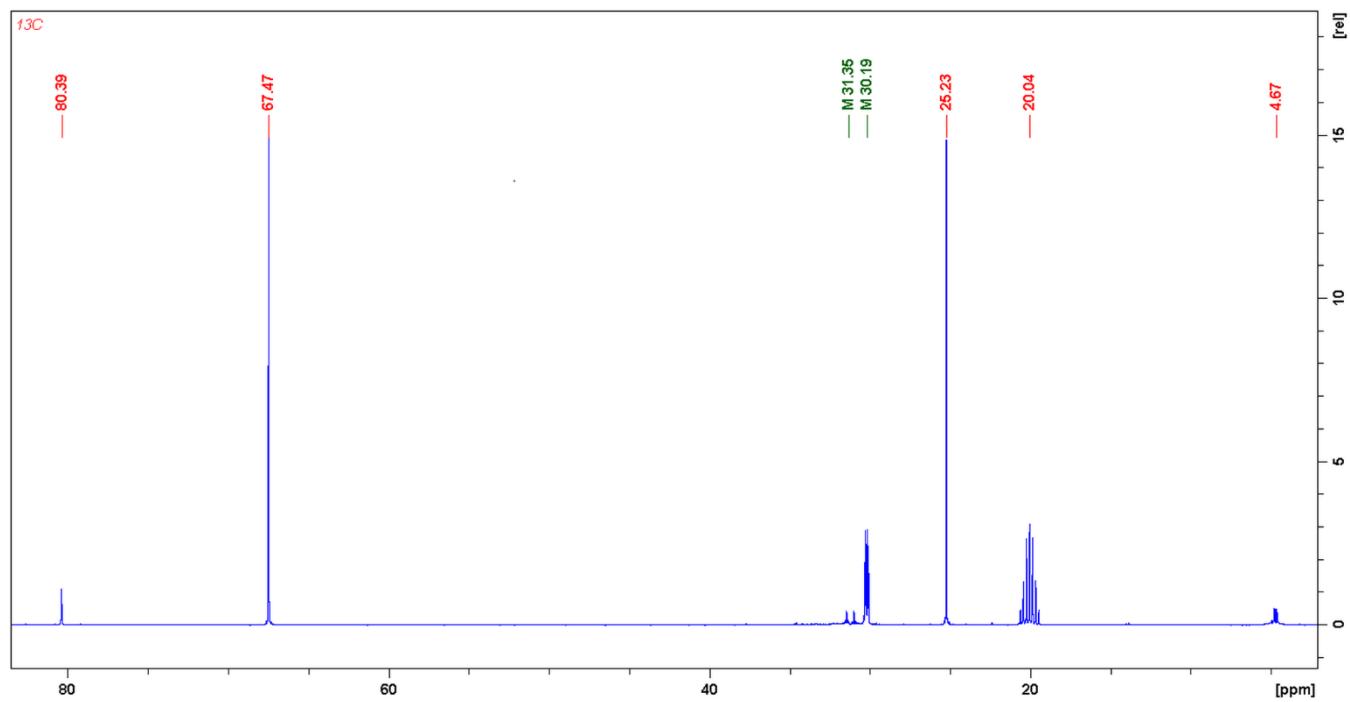

**Figure S107.**  $^{13}\text{C}\{^1\text{H}\}$  NMR (400 MHz, Toluene- $d_8$ , 298 K) spectrum of reaction mixture of **2** with acetophenone in the range of 85 ppm to 0 ppm.

## B.2.10. Cyclopropyl methyl ketone

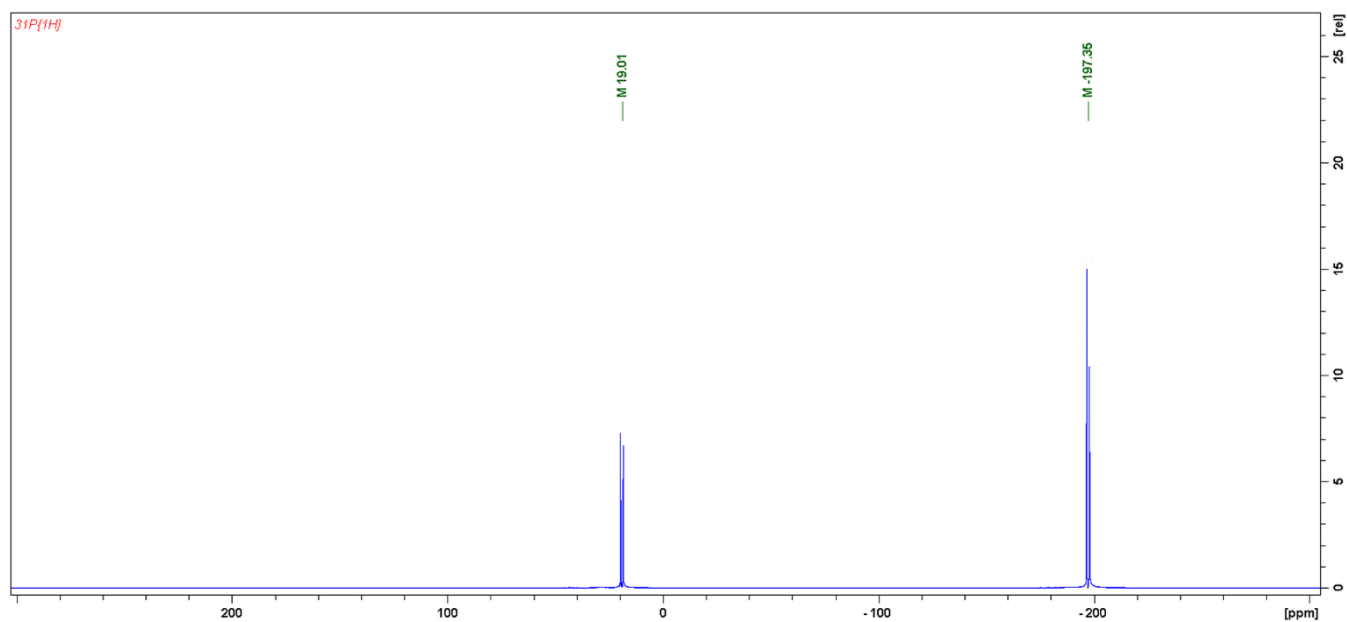

**Figure S108.**  $^{31}\text{P}\{^1\text{H}\}$  NMR (400 MHz, Toluene- $d_8$ , 298 K) spectrum of reaction mixture of **2** with cyclopropyl methyl ketone.

- 19.01 ppm, (d),  $J_{\text{P-P}} = 188.9$  Hz,  $t\text{Bu}_2\text{P-P}(\text{SiMe}_3)\text{H}$ ;
- -197.35 ppm, (d),  $J_{\text{P-P}} = 188,9$  Hz,  $t\text{Bu}_2\text{P-P}(\text{SiMe}_3)\text{H}$ ;

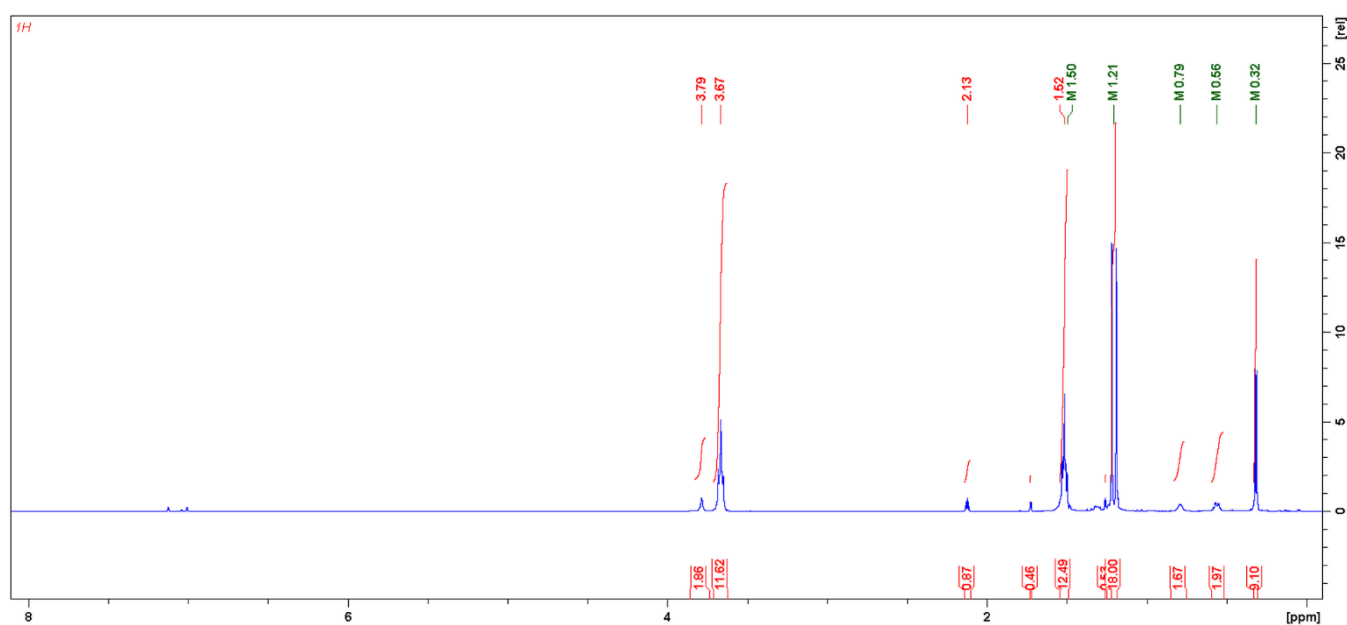

**Figure S109.**  $^1\text{H}$  NMR (400 MHz, Toluene- $d_8$ , 298 K) spectrum of reaction mixture of **2** with cyclopropyl methyl ketone.

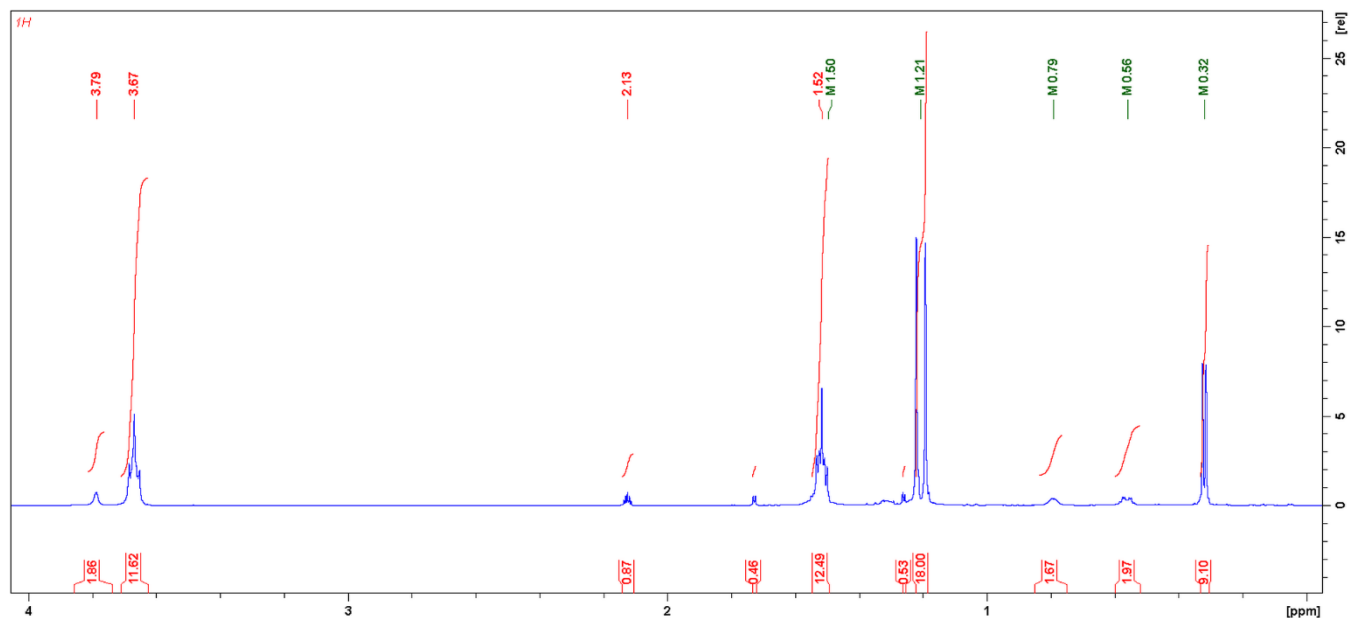

**Figure S110.**  $^1\text{H}$  NMR (400 MHz, Toluene- $d_8$ , 298 K) spectrum of reaction mixture of **2** with cyclopropyl methyl ketone in the range from 4 ppm to 0 ppm.

- 3.79 ppm, (broad s), 2H,  $(\text{CH}_2\text{CH}_2\text{CH})(\text{CH}_2=)\text{C-OLi}(\text{THF})_3$ ;
- 3.76 and 1.52 ppm, (quinted), 24H,  $(\text{CH}_2\text{CH}_2\text{CH})(\text{CH}_2=)\text{C-OLi}(\text{THF})_3$ ;
- 2.13 ppm, (sept.), 1H,  $(\text{CH}_2\text{CH}_2\text{CH})(\text{CH}_2=)\text{C-OLi}(\text{THF})_3$ ;
- 1.50 ppm, (dd), 1H,  $J_{\text{P-H}} = 188.3$  Hz,  $J_{\text{P-H}} = 2.7$  Hz,  $t\text{Bu}_2\text{P-P}(\text{SiMe}_3)\text{H}$ ;
- 1.21 ppm, (d), 18H, 1H,  $J_{\text{P-H}} = 11.4$  Hz,  $t\text{Bu}_2\text{P-P}(\text{SiMe}_3)\text{H}$ ;
- 0.79 ppm, (broad m), 2H,  $(\text{CH}_2\text{CH}_2\text{CH})(\text{CH}_2=)\text{C-OLi}(\text{THF})_3$ ;
- 0.55 ppm, (broad m), 2H,  $(\text{CH}_2\text{CH}_2\text{CH})(\text{CH}_2=)\text{C-OLi}(\text{THF})_3$ ;



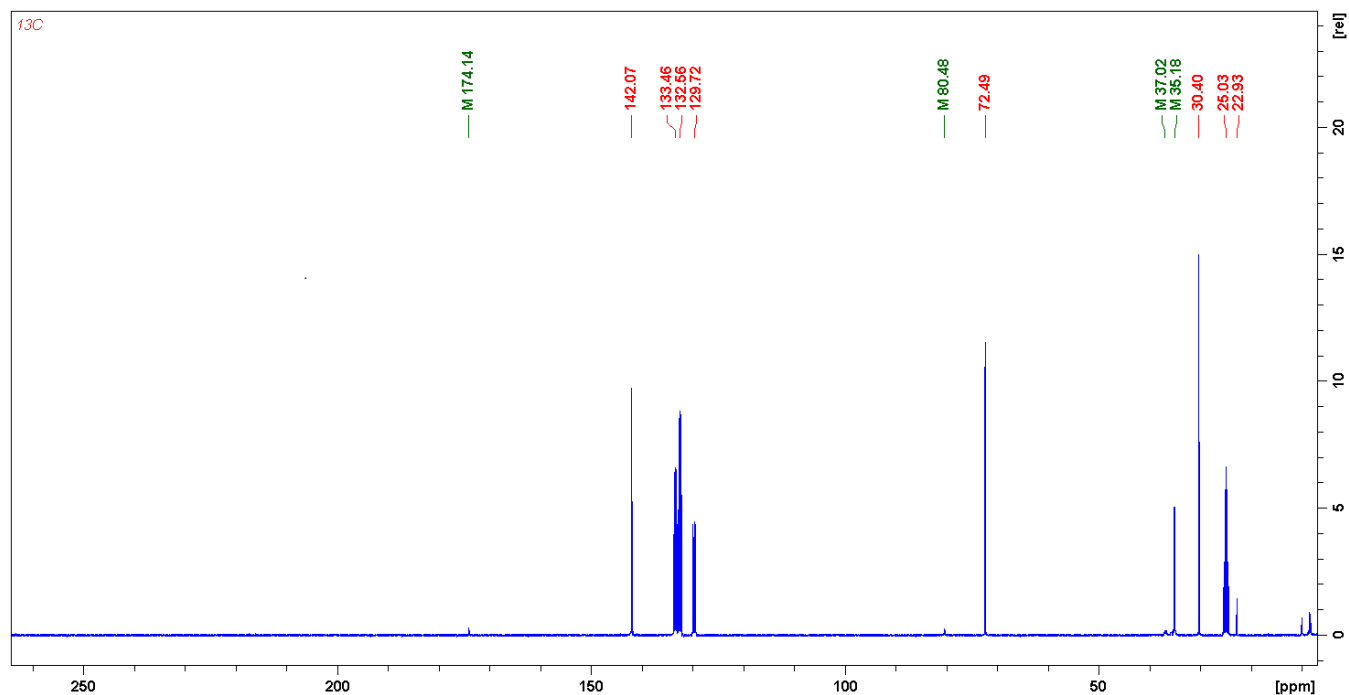

**Figure S111.**  $^{13}\text{C}\{^1\text{H}\}$  NMR (400 MHz, Toluene- $d_8$ , 298 K) spectrum of reaction mixture of **2** with cyclopropyl methyl ketone.

- 142.07, 133.46, 132.56, 129.72, 25.03 ppm, toluene- $d_8$ ;
- 174.14 ppm, (s),  $(\text{CH}_2\text{CH}_2\text{CH})(\text{CH}_2=)\text{C-OLi}(\text{THF})_3$ ;
- 80.48 ppm, (s),  $(\text{CH}_2\text{CH}_2\text{CH})(\text{CH}_2=)\text{C-OLi}(\text{THF})_3$ ;
- 72.49, 30.40 ppm, (s),  $(\text{CH}_2\text{CH}_2\text{CH})(\text{CH}_2=)\text{C-OLi}(\text{THF})_3$ ;
- 37.02 ppm, (broad d),  $J_{\text{P-C}} = 34.5$  Hz,  $\{(\text{CH}_3)\text{C}\}_2\text{P-P}(\text{SiMe}_3)\text{H}$ ;
- 35.18 ppm, (dd),  $J_{\text{P-C}} = 30.2$  Hz,  $J_{\text{P-C}} = 5.4$  Hz,  $\{(\text{CH}_3)\text{C}\}_2\text{P-P}(\text{SiMe}_3)\text{H}$ ;
- 22.93 ppm, (s),  $(\text{CH}_2\text{CH}_2\text{CH})(\text{CH}_2=)\text{C-OLi}(\text{THF})_3$ ;
- 10.10 ppm, (s),  $(\text{CH}_2\text{CH}_2\text{CH})(\text{CH}_2=)\text{C-OLi}(\text{THF})_3$ ;
- 7.82 ppm, (dd),  $J_{\text{P-C}} = 10.4$  Hz,  $J_{\text{P-C}} = 5.1$  Hz,  $\{(\text{CH}_3)\text{C}\}_2\text{P-P}(\text{SiMe}_3)\text{H}$ ;

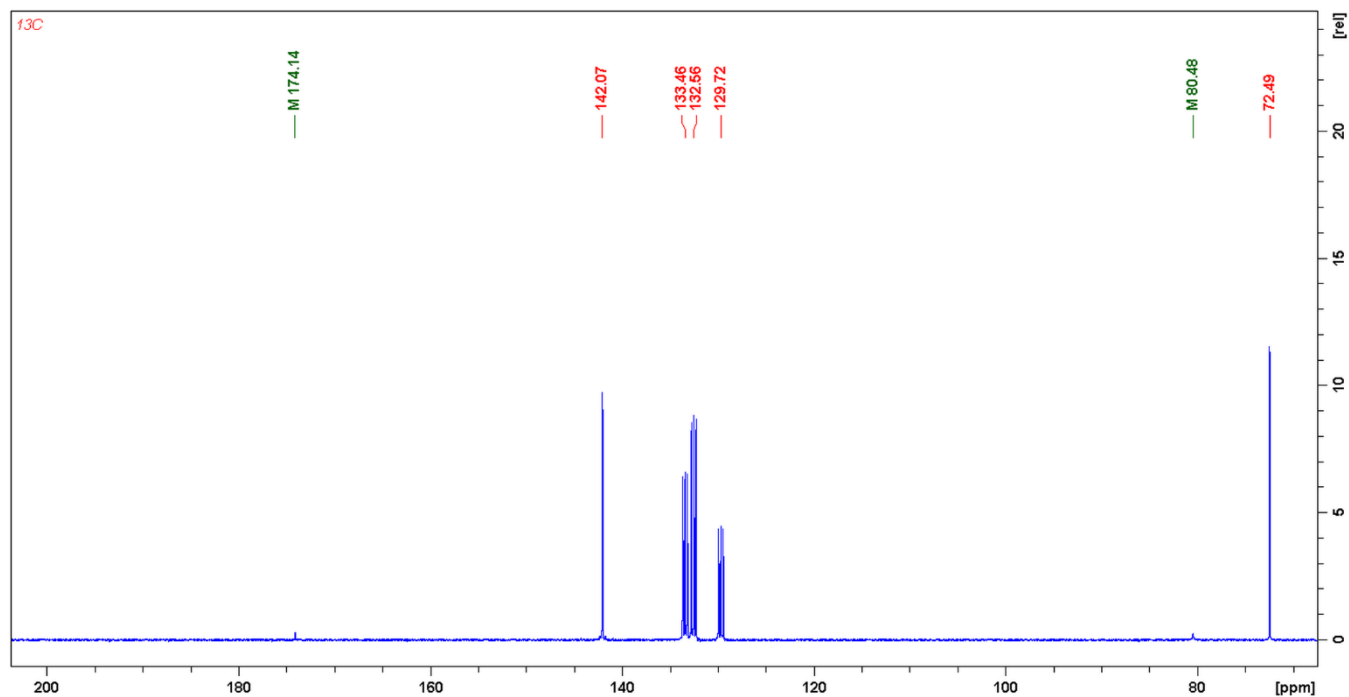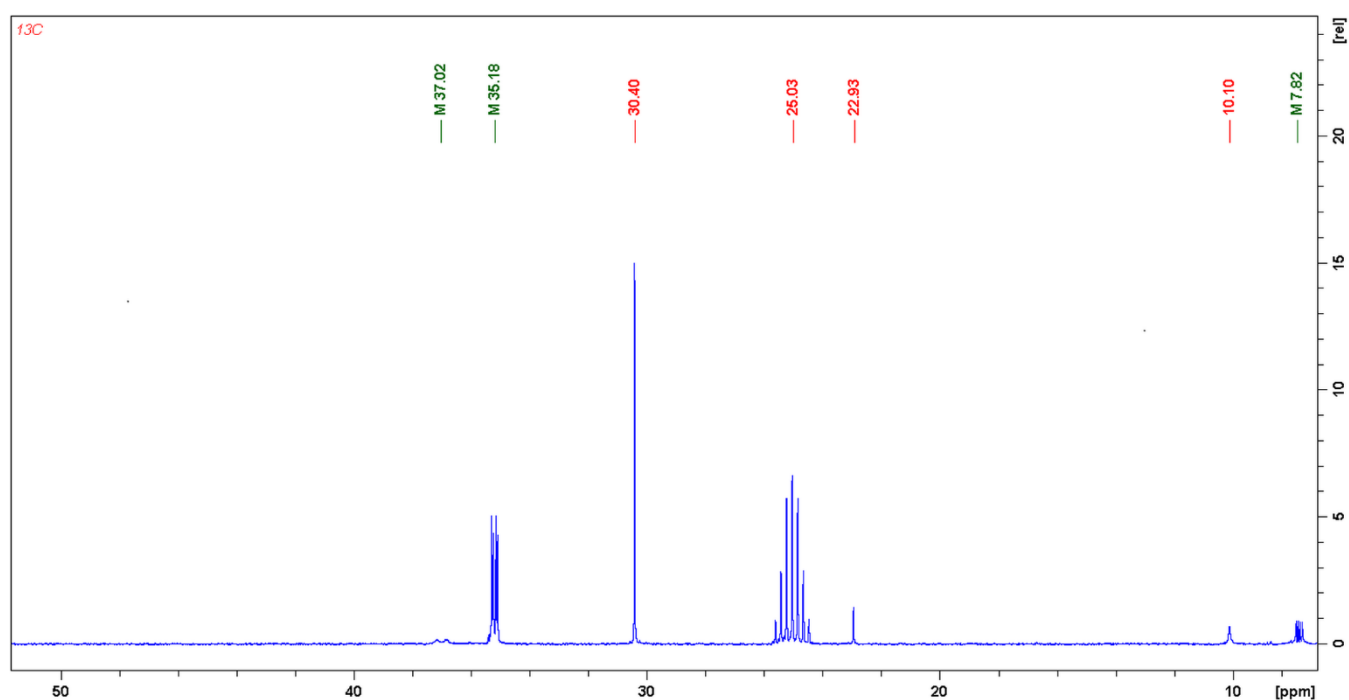

## B.2.11. Isobutyraldehyde

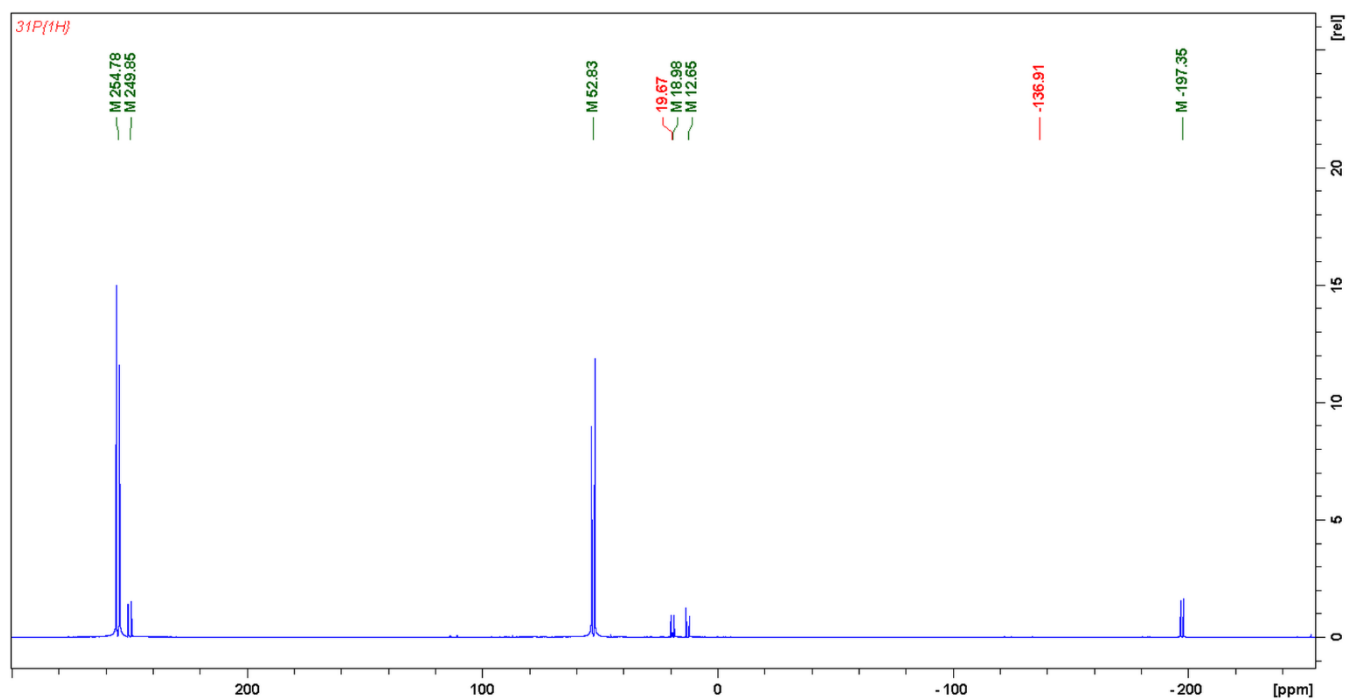

**Figure S114.**  $^{31}\text{P}\{^1\text{H}\}$  NMR (400 MHz, Toluene- $d_8$ , 298 K) spectrum of reaction mixture of **2** with isobutyraldehyde.

- 254.78 ppm, (d),  $J_{\text{P-P}} = 220.8$  Hz,  $\{(\text{Me})_2\text{CH}\}(\text{H})\text{C}=\text{P}-\text{P}t\text{Bu}_2 - E$  isomer;
- 249.85 ppm, (d),  $J_{\text{P-P}} = 212.8$  Hz,  $\{(\text{Me})_2\text{CH}\}(\text{H})\text{C}=\text{P}-\text{P}t\text{Bu}_2 - Z$  isomer;
- 52.83 ppm, (d),  $J_{\text{P-P}} = 220.8$  Hz,  $\{(\text{Me})_2\text{CH}\}(\text{H})\text{C}=\text{P}-\text{P}t\text{Bu}_2 - E$  isomer;
- 19.47 ppm, (s),  $t\text{Bu}_2\text{PH}$ ;
- 18.98 ppm, (d),  $J_{\text{P-P}} = 188.7$  Hz,  $t\text{Bu}_2\text{P}-\text{P}(\text{SiMe}_3)\text{H}$ ;
- 12.65 ppm, (d),  $J_{\text{P-P}} = 212.8$  Hz,  $\{(\text{Me})_2\text{CH}\}(\text{H})\text{C}=\text{P}-\text{P}t\text{Bu}_2 - Z$  isomer;
- -197.35 ppm, (d),  $J_{\text{P-P}} = 188.7$  Hz,  $t\text{Bu}_2\text{P}-\text{P}(\text{SiMe}_3)\text{H}$ ;

## B.2.12. Cyclohexanecarboxaldehyde

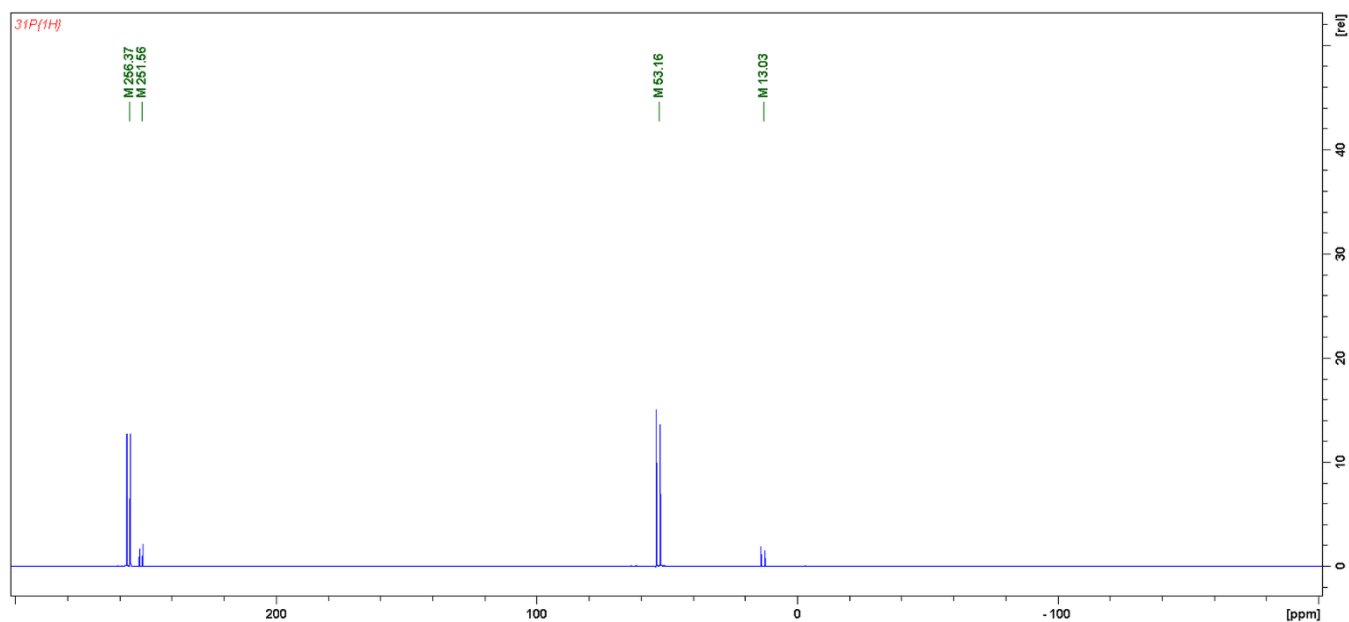

**Figure S115.**  $^{31}\text{P}\{^1\text{H}\}$  NMR (400 MHz,  $\text{C}_6\text{D}_6$ , 298 K) spectrum of isolated  $\{\text{cyclo}-(\text{CH}_2)_4\text{CH}\}(\text{H})\text{C}=\text{P}-\text{PtBu}_2$ .

- 256.37 ppm, (d),  $J_{\text{P-P}} = 220.8$  Hz,  $\{\text{cyclo}-(\text{CH}_2)_4\text{CH}\}(\text{H})\text{C}=\text{P}-\text{PtBu}_2 - E$  isomer;
- 251.56 ppm, (d),  $J_{\text{P-P}} = 212.8$  Hz,  $\{\text{cyclo}-(\text{CH}_2)_4\text{CH}\}(\text{H})\text{C}=\text{P}-\text{PtBu}_2 - Z$  isomer;
- 53.16 ppm, (d),  $J_{\text{P-P}} = 220.8$  Hz,  $\{\text{cyclo}-(\text{CH}_2)_4\text{CH}\}(\text{H})\text{C}=\text{P}-\text{PtBu}_2 - E$  isomer;
- 13.03 ppm, (d),  $J_{\text{P-P}} = 212.8$  Hz,  $\{\text{cyclo}-(\text{CH}_2)_4\text{CH}\}(\text{H})\text{C}=\text{P}-\text{PtBu}_2 - Z$  isomer;

### B.2.13. *p*-Tolualdehyde

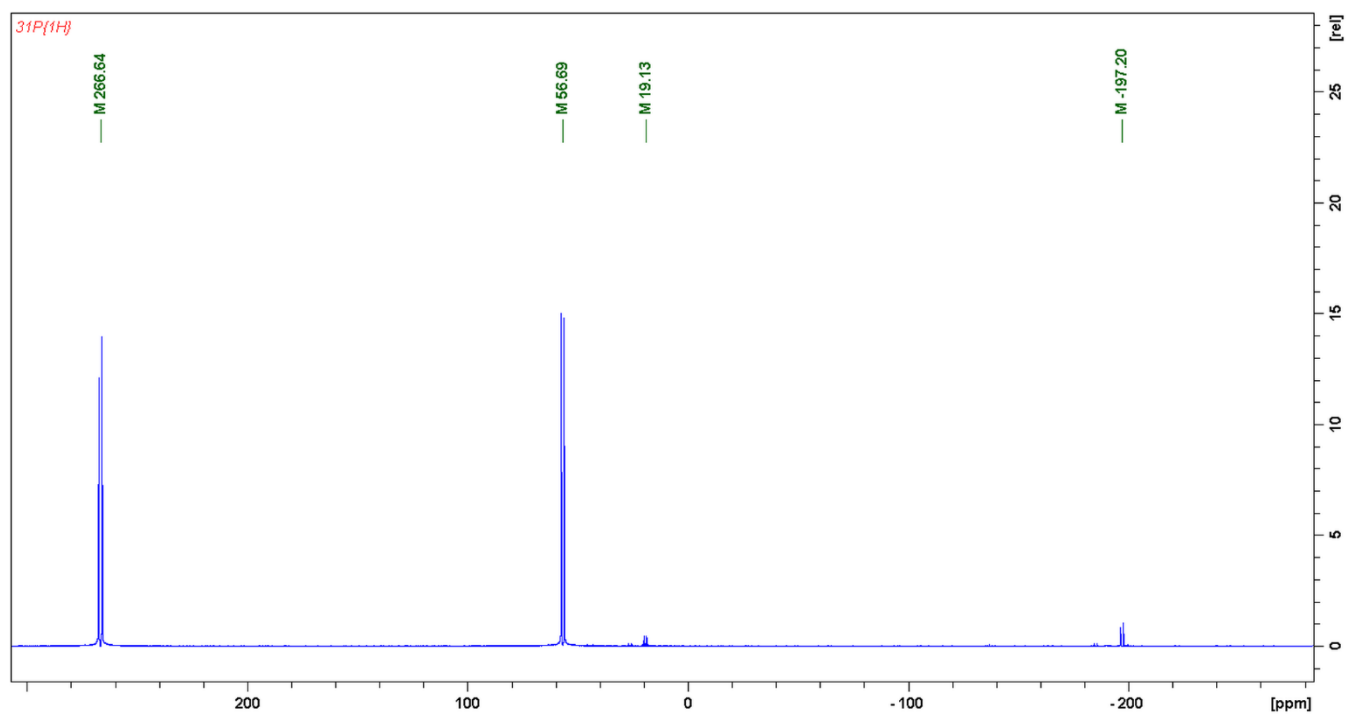

**Figure S116.**  $^{31}\text{P}\{^1\text{H}\}$  NMR (400 MHz,  $\text{C}_6\text{D}_6$ , 298 K) spectrum of reaction mixture of **2** with *p*-Tolualdehyde.

Visible only one *E* isomer

- 266.64 ppm, (d),  $J_{\text{P-P}} = 220.8$  Hz, (*p*-Me-Ph)(H)C=P-P*t*Bu<sub>2</sub>;
- 56.69 ppm, (d),  $J_{\text{P-P}} = 220.8$  Hz, (*p*-Me-Ph)(H)C=P-P*t*Bu<sub>2</sub>;
- 19.13 ppm, (d),  $J_{\text{P-P}} = 188.9$  Hz, *t*Bu<sub>2</sub>P-P(SiMe<sub>3</sub>)H;
- -197.20 ppm, (d),  $J_{\text{P-P}} = 188.9$  Hz, *t*Bu<sub>2</sub>P-P(SiMe<sub>3</sub>)H;

## B.2.14. 4-(dimethylamino)benzaldehyde

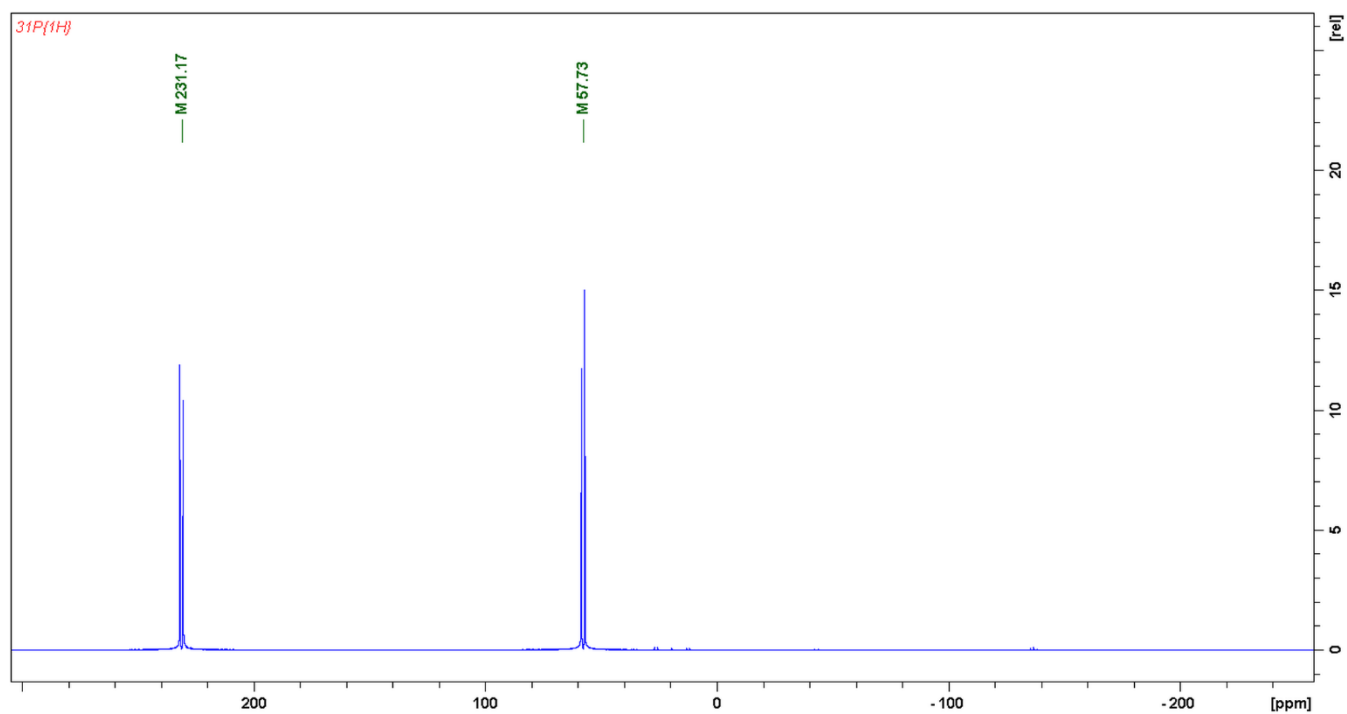

**Figure S117.**  $^{31}\text{P}\{^1\text{H}\}$  NMR (400 MHz,  $\text{C}_6\text{D}_6$ , 298 K) spectrum of isolated  $\{4-(\text{Me})_2\text{N-Ph}\}(\text{H})\text{C}=\text{P}-\text{P}t\text{Bu}_2$  (**4d**).

Visible only one *E* isomer

- 231.17 ppm, (d),  $J_{\text{P-P}} = 224.9$  Hz,  $\{4-(\text{Me})_2\text{N-Ph}\}(\text{H})\text{C}=\text{P}-\text{P}t\text{Bu}_2$ ;
- 57.73 ppm, (d),  $J_{\text{P-P}} = 224.9$  Hz,  $\{4-(\text{Me})_2\text{N-Ph}\}(\text{H})\text{C}=\text{P}-\text{P}t\text{Bu}_2$ ;

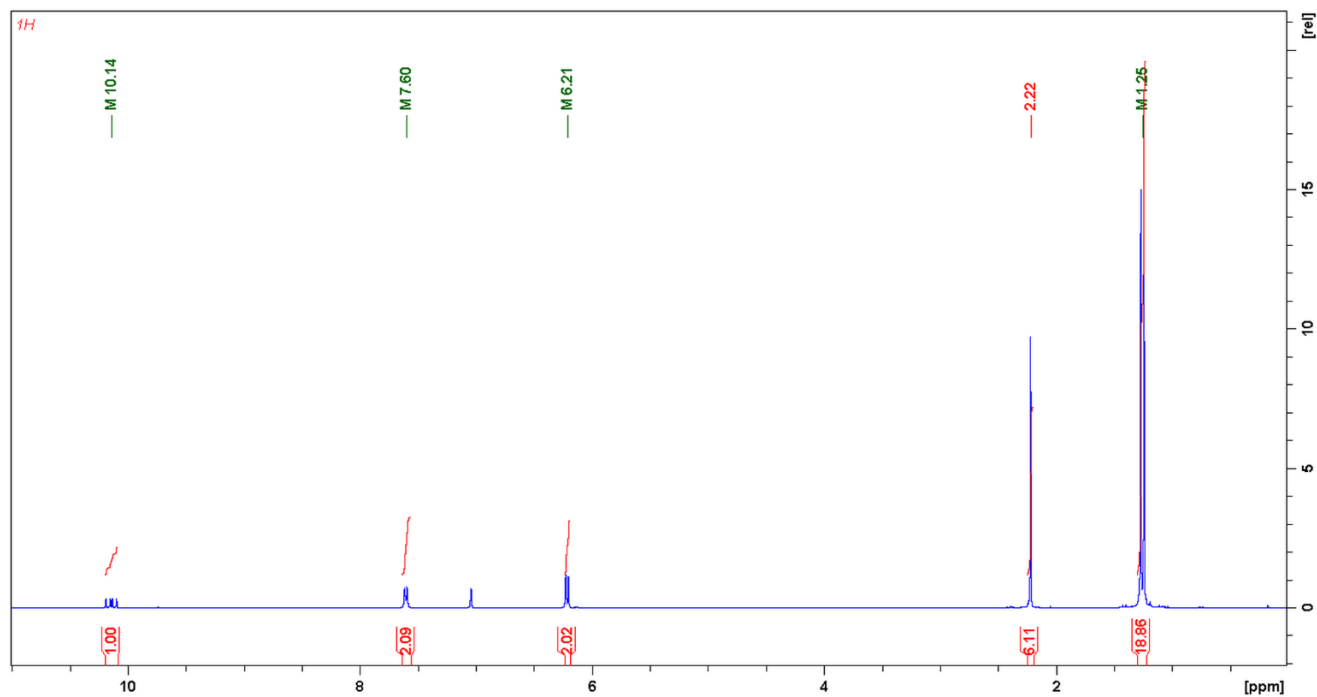

**Figure S118.**  $^1\text{H}$  NMR (400 MHz,  $\text{C}_6\text{D}_6$ , 298 K) spectrum of isolated  $\{4-(\text{Me})_2\text{N-Ph}\}(\text{H})\text{C}=\text{P-P}t\text{Bu}_2$  (**4d**).

Visible only one *E* isomer

- 10.14 ppm, (dd),  $J_{\text{P-H}} = 21.8$  Hz,  $J_{\text{P-H}} = 14.4$  Hz, 1H,  $\{4-(\text{Me})_2\text{N-Ph}\}(\text{H})\text{C}=\text{P-P}t\text{Bu}_2$ ;
- 7.60 ppm, (dd),  $J_{\text{P-H}} = 9.2$  Hz,  $J_{\text{P-H}} = 2.6$  Hz, 2H,  $\{4-(\text{Me})_2\text{N-Ph}\}(\text{H})\text{C}=\text{P-P}t\text{Bu}_2$  (*o*-H);
- 6.21 ppm, (d),  $J_{\text{P-H}} = 8.9$  Hz, 2H,  $\{4-(\text{Me})_2\text{N-Ph}\}(\text{H})\text{C}=\text{P-P}t\text{Bu}_2$  (*m*-H);
- 2.22 ppm, (s), 6H,  $\{4-(\text{Me})_2\text{N-Ph}\}(\text{H})\text{C}=\text{P-P}t\text{Bu}_2$ ;
- 1.25 ppm, (d),  $J_{\text{P-H}} = 11.1$  Hz, 18H,  $\{4-(\text{Me})_2\text{N-Ph}\}(\text{H})\text{C}=\text{P-P}t\text{Bu}_2$ ;

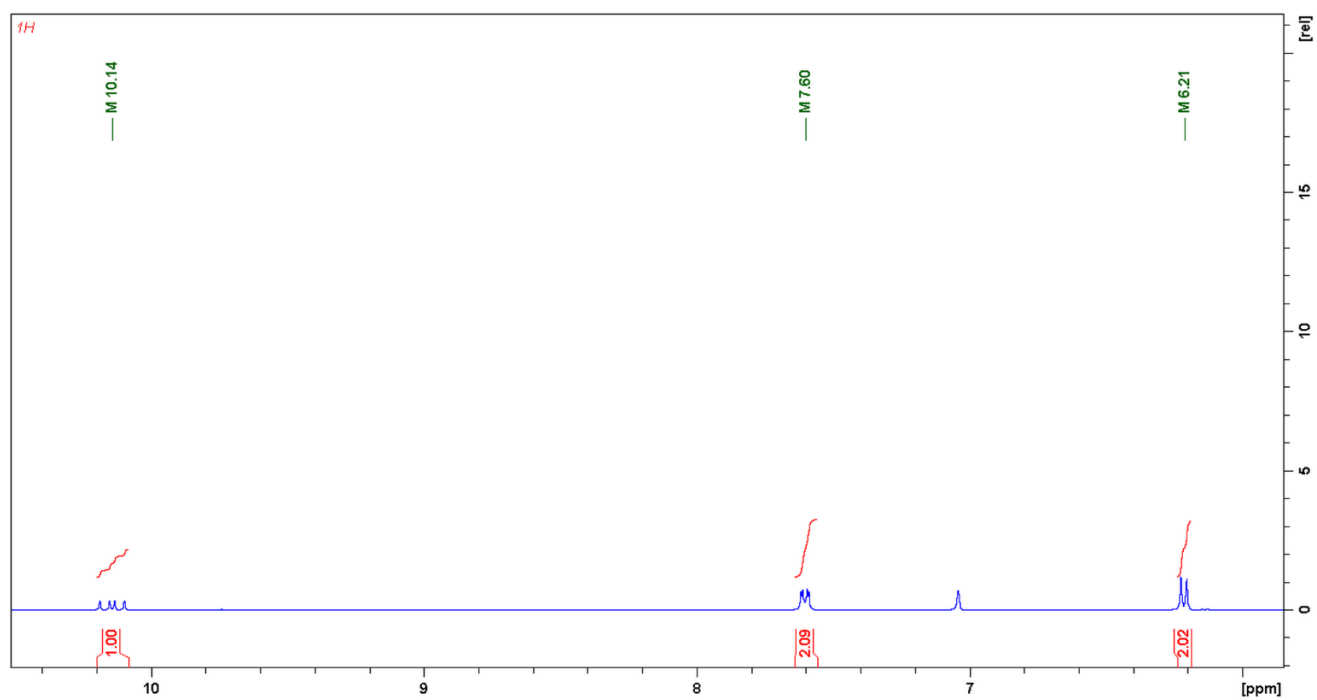

**Figure S119.**  $^{31}\text{P}\{^1\text{H}\}$  NMR (400 MHz,  $\text{C}_6\text{D}_6$ , 298 K) spectrum of isolated  $\{4-(\text{Me})_2\text{N-Ph}\}(\text{H})\text{C}=\text{P-P}t\text{Bu}_2$  (**4d**) in the range from 10.5 ppm to 6 ppm.

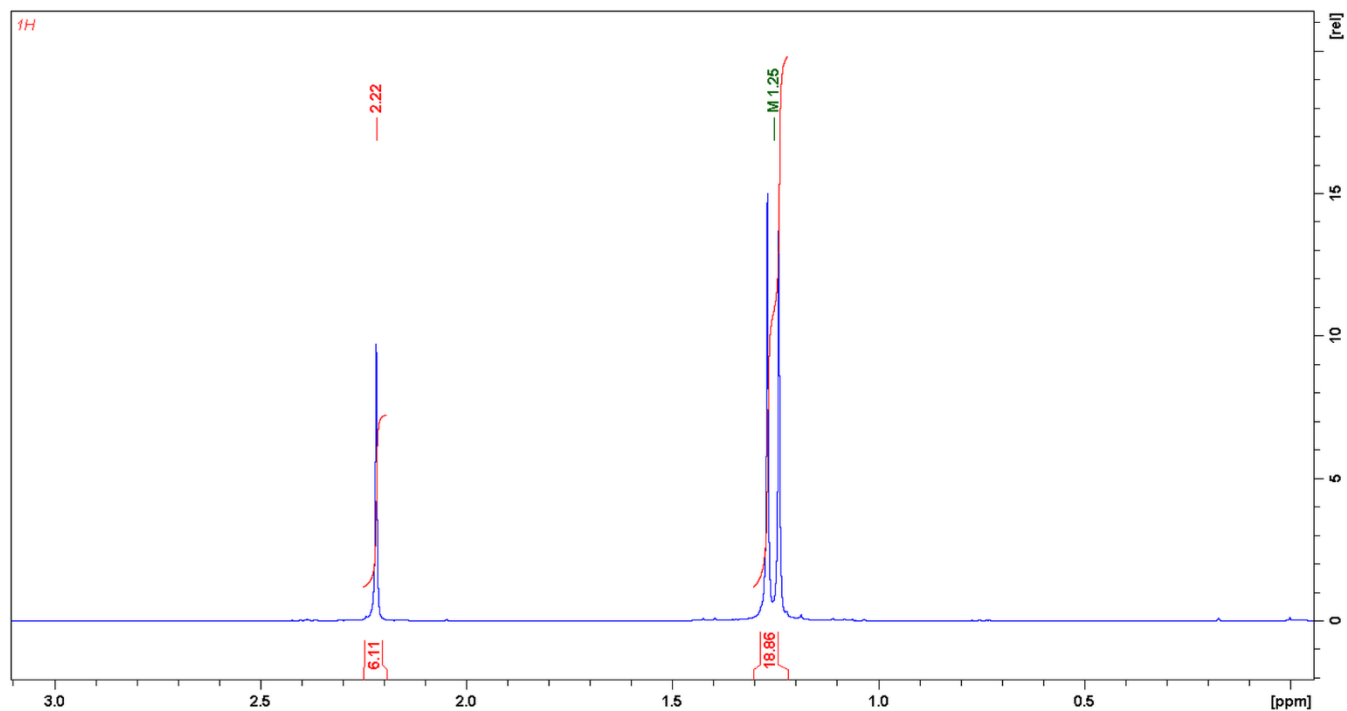

**Figure S120.**  $^1\text{H}$  NMR (400 MHz,  $\text{C}_6\text{D}_6$ , 298 K) spectrum of isolated  $\{4\text{-(Me)}_2\text{N-Ph}\}\text{(H)C=P-P}t\text{Bu}_2$  (**4d**) in the range from 3 ppm to 0 ppm.

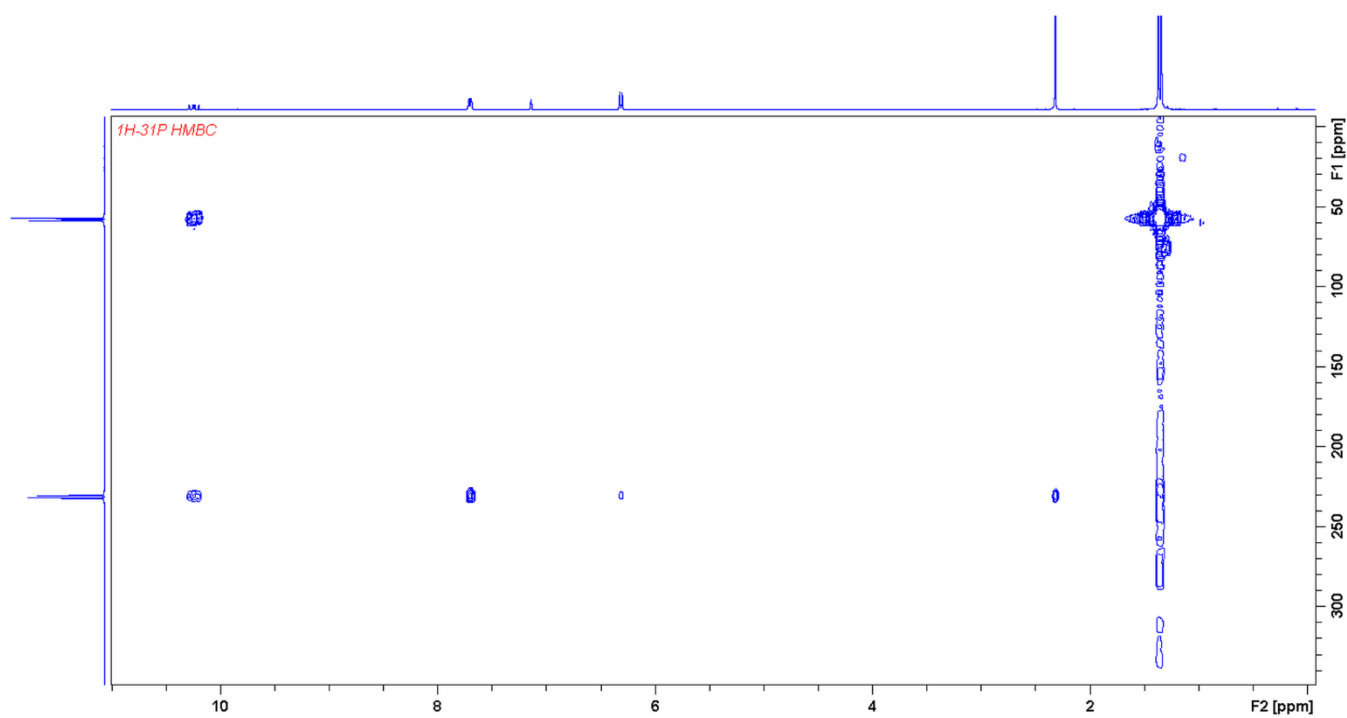

**Figure S121.**  $^1\text{H}$ - $^{31}\text{P}$  HMBC (400 MHz,  $\text{C}_6\text{D}_6$ , 298 K) spectrum of isolated  $\{4\text{-(Me)}_2\text{N-Ph}\}\text{(H)C=P-P}t\text{Bu}_2$  (**4d**).



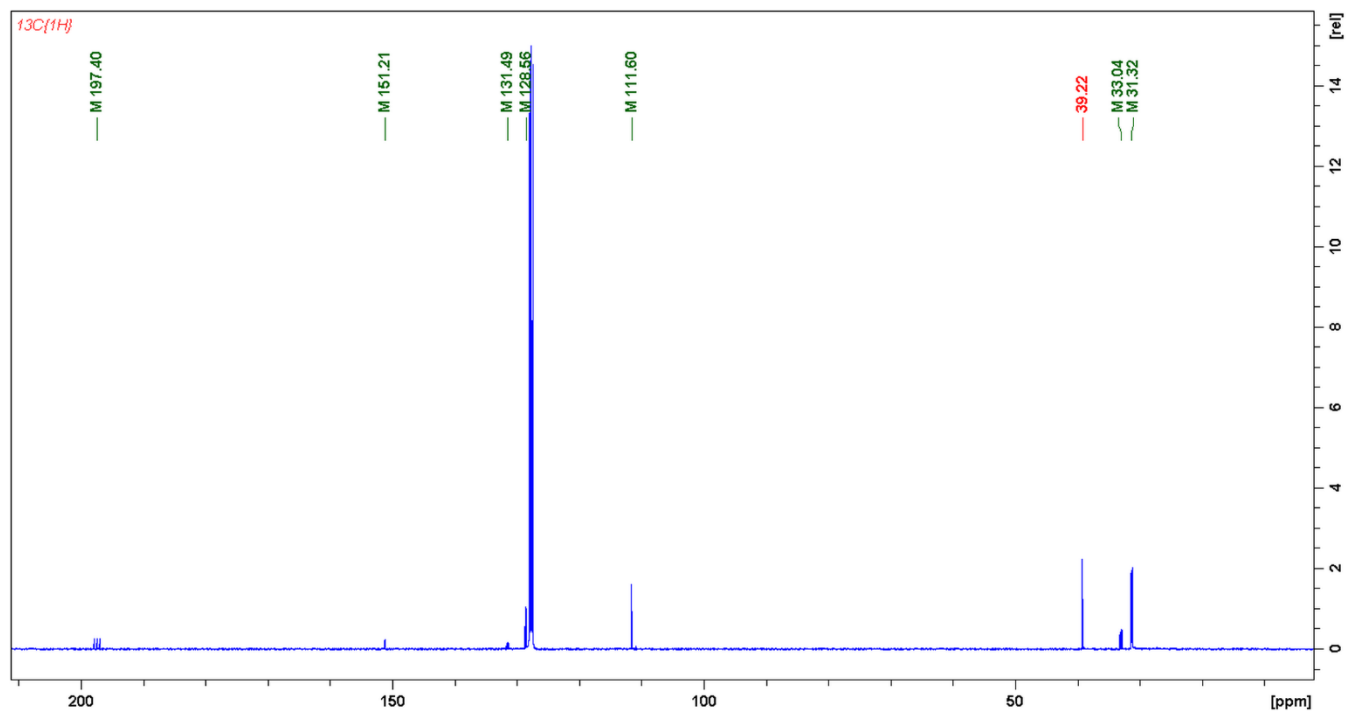

**Figure S122.**  $^{13}\text{C}\{^1\text{H}\}$  NMR (400 MHz,  $\text{C}_6\text{D}_6$ , 298 K) spectrum of isolated  $\{4-(\text{Me})_2\text{N-Ph}\}(\text{H})\text{C}=\text{P-P}t\text{Bu}_2$  (**4d**).

Visible only one *E* isomer

- 197.40 ppm, (dd),  $J_{\text{P-C}} = 46.3$  Hz,  $J_{\text{P-C}} = 39.9$  Hz,  $\{4-(\text{Me})_2\text{N-Ph}\}(\text{H})\text{C}=\text{P-P}t\text{Bu}_2$ ;
- 151.20 ppm, (d),  $J_{\text{P-C}} = 5.5$  Hz,  $\{4-(\text{Me})_2\text{N-Ph}\}(\text{H})\text{C}=\text{P-P}t\text{Bu}_2$  (*p*-C<sub>Ar</sub>);
- 131.49 ppm, (dd),  $J_{\text{P-C}} = 16.3$  Hz,  $J_{\text{P-C}} = 11.8$  Hz,  $\{4-(\text{Me})_2\text{N-Ph}\}(\text{H})\text{C}=\text{P-P}t\text{Bu}_2$  (*i*-C<sub>Ar</sub>);
- 128.56 ppm, (d),  $J_{\text{P-C}} = 19.9$  Hz,  $\{4-(\text{Me})_2\text{N-Ph}\}(\text{H})\text{C}=\text{P-P}t\text{Bu}_2$  (*o*-C<sub>Ar</sub>);
- 111.60 ppm, (d),  $J_{\text{P-C}} = 19.9$  Hz,  $\{4-(\text{Me})_2\text{N-Ph}\}(\text{H})\text{C}=\text{P-P}t\text{Bu}_2$  (*m*-C<sub>Ar</sub>);
- 39.22 ppm, (s),  $\{4-(\text{Me})_2\text{N-Ph}\}(\text{H})\text{C}=\text{P-P}t\text{Bu}_2$ ;
- 33.04 ppm, (dd),  $J_{\text{P-C}} = 22.7$  Hz,  $J_{\text{P-C}} = 1.8$  Hz,  $\{4-(\text{Me})_2\text{N-Ph}\}(\text{H})\text{C}=\text{P-P}\{\text{C}(\text{CH}_3)_3\}_2$ ;
- 31.32 ppm, (dd),  $J_{\text{P-C}} = 13.6$  Hz,  $J_{\text{P-C}} = 5.5$  Hz,  $\{4-(\text{Me})_2\text{N-Ph}\}(\text{H})\text{C}=\text{P-P}\{\text{C}(\text{CH}_3)_3\}_2$ ;

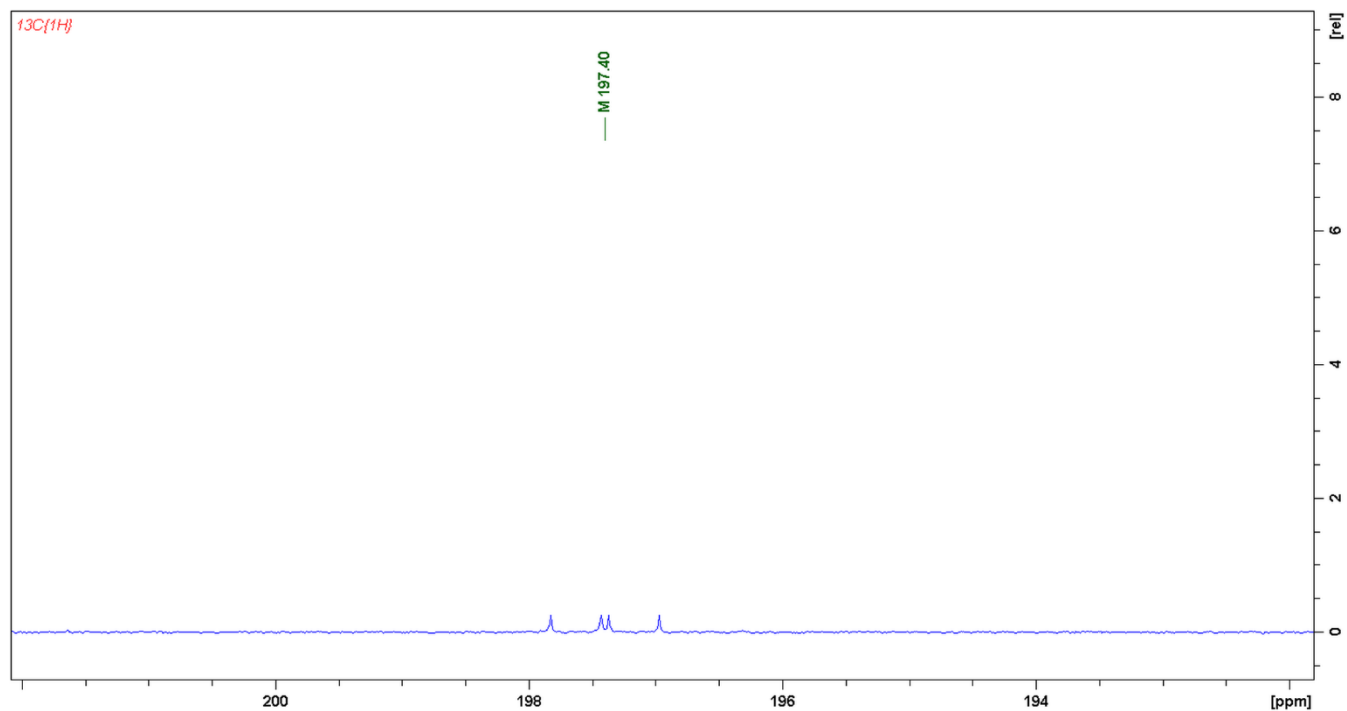

**Figure S123.** <sup>13</sup>C{<sup>1</sup>H} NMR (400 MHz, C<sub>6</sub>D<sub>6</sub>, 298 K) spectrum of isolated {4-(Me)<sub>2</sub>N-Ph}(H)C=P-PrBu<sub>2</sub> (**4d**) in the range from 202 ppm to 192 ppm.

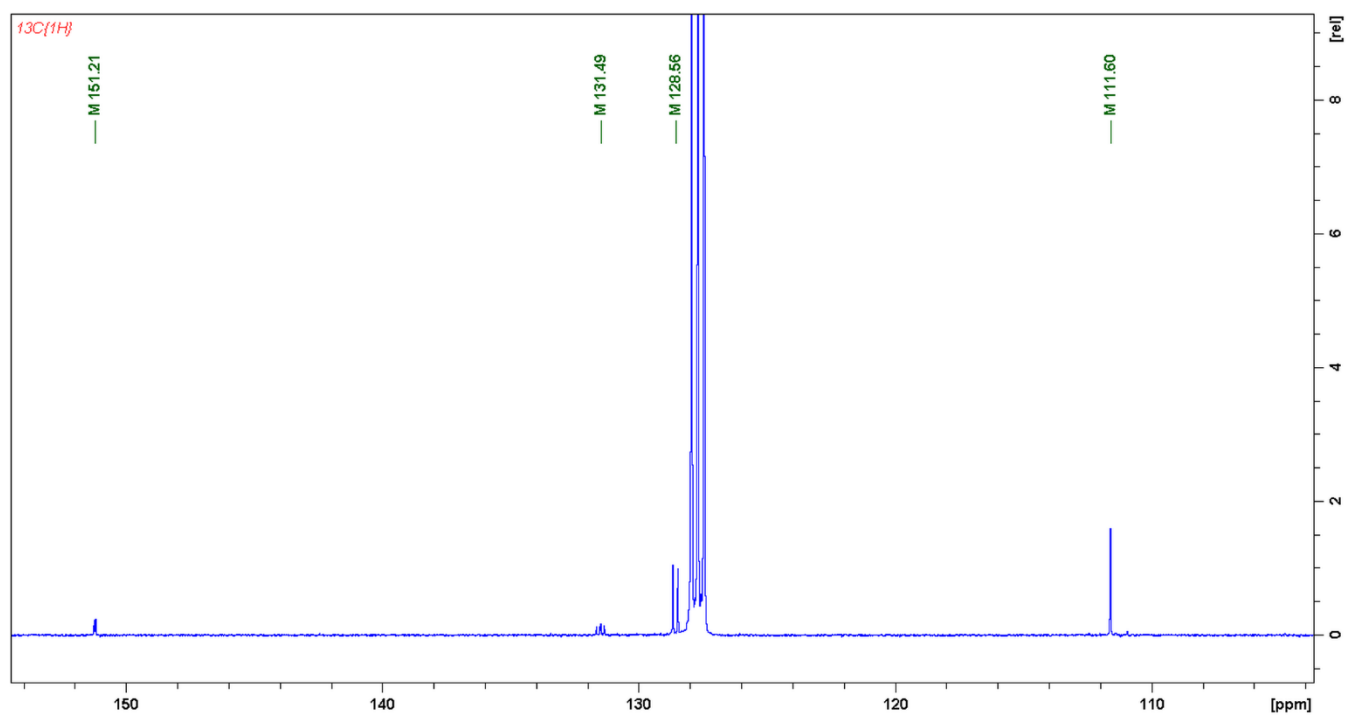

**Figure S124.** <sup>13</sup>C{<sup>1</sup>H} NMR (400 MHz, C<sub>6</sub>D<sub>6</sub>, 298 K) spectrum of isolated {4-(Me)<sub>2</sub>N-Ph}(H)C=P-PrBu<sub>2</sub> (**4d**) in the range from 155 ppm to 105 ppm.

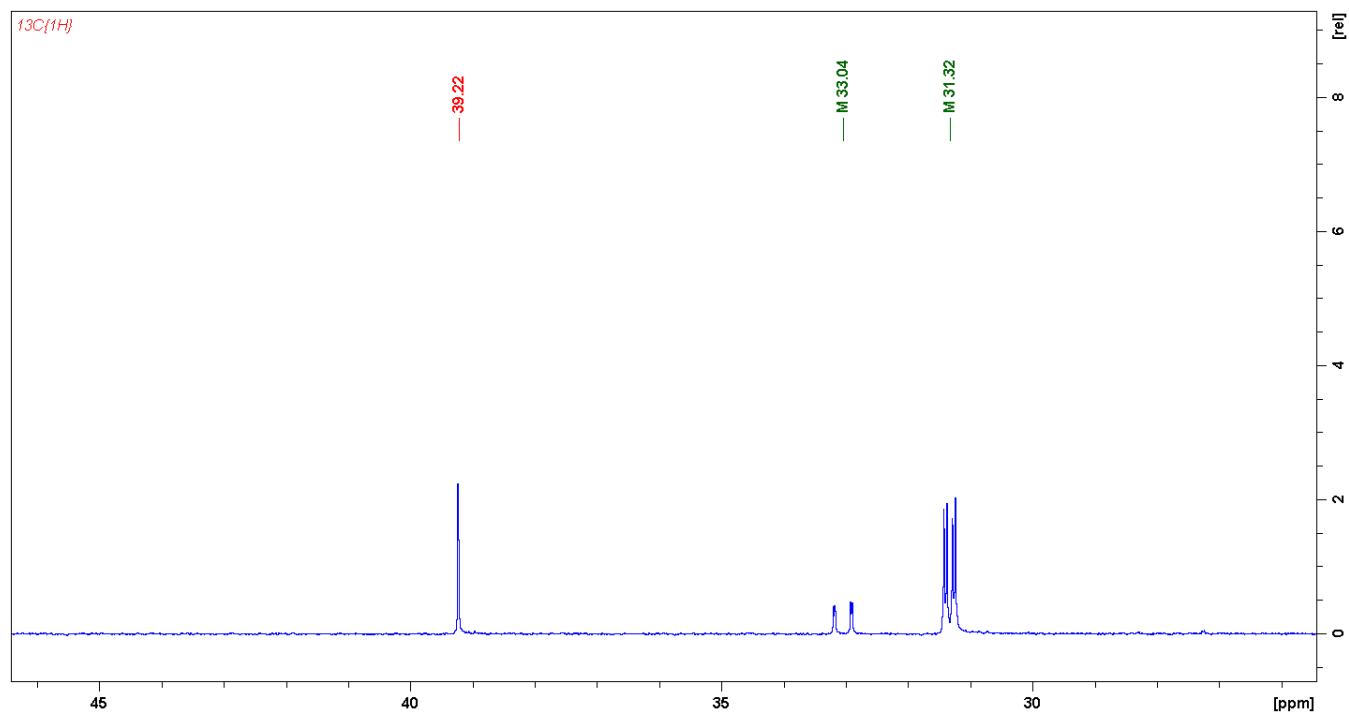

**Figure S125.**  $^{13}\text{C}\{^1\text{H}\}$  NMR (400 MHz,  $\text{C}_6\text{D}_6$ , 298 K) spectrum of isolated  $\{4\text{-(Me)}_2\text{N-Ph}\}\text{(H)C=P-P}t\text{Bu}_2$  (**4d**) in the range from 45 ppm to 25 ppm.

## B.2.15. Biphenyl-4-carboxaldehyde

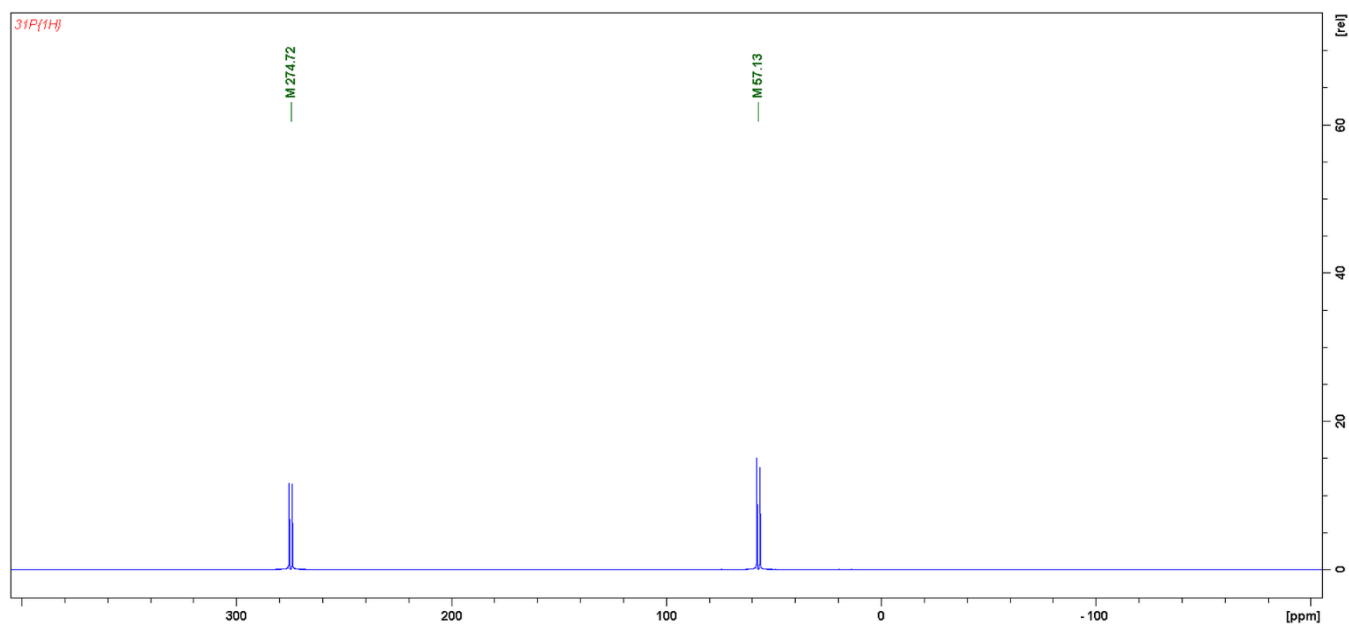

**Figure S126.**  $^{31}\text{P}\{^1\text{H}\}$  NMR (400 MHz,  $\text{C}_6\text{D}_6$ , 298 K) of isolated crystals of  $\text{PhPh}(\text{H})\text{C}=\text{P}-\text{PtBu}_2$  (**4e**).

- 274.72 ppm, (d),  $J_{\text{P-P}} = 224.9$  Hz,  $\text{PhPh}(\text{H})\text{C}=\text{P}-\text{PtBu}_2$ ;
- 57.13 ppm, (d),  $J_{\text{P-P}} = 224.9$  Hz,  $\text{PhPh}(\text{H})\text{C}=\text{P}-\text{PtBu}_2$ ;

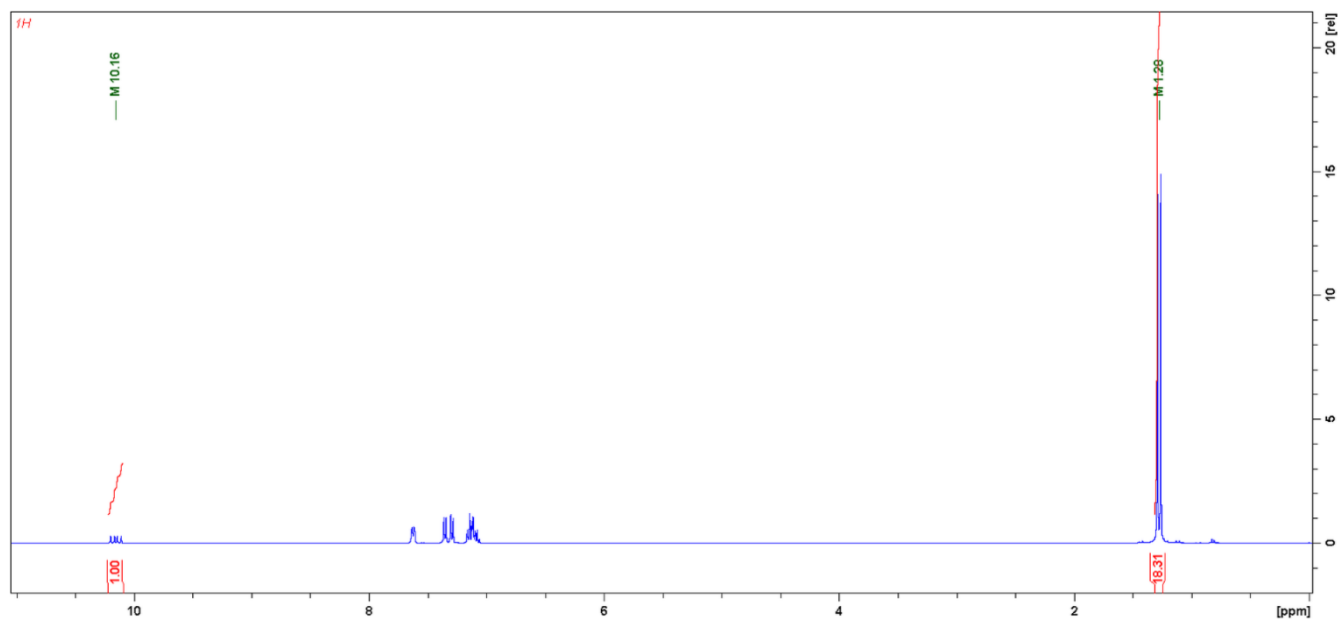

**Figure S127.**  $^1\text{H}$  NMR (400 MHz,  $\text{C}_6\text{D}_6$ , 298 K) spectrum of isolated crystals of  $\text{PhPh}(\text{H})\text{C}=\text{P}-\text{PtBu}_2$  (**4e**).

- 10.16 ppm, (dd), 1H,  $J_{\text{P-H}} = 22.5$  Hz,  $J_{\text{P-H}} = 13.4$  Hz,  $\text{PhPh}(\text{H})\text{C}=\text{P}-\text{PtBu}_2$ ;
- 7.67 – 7.04 ppm, 9H, aromatic protons,  $\text{PhPh}(\text{H})\text{C}=\text{P}-\text{PtBu}_2$
- 1.28 ppm, (d), 18 H,  $J_{\text{P-H}} = 11.1$  Hz,  $\text{PhPh}(\text{H})\text{C}=\text{P}-\text{PtBu}_2$ ;

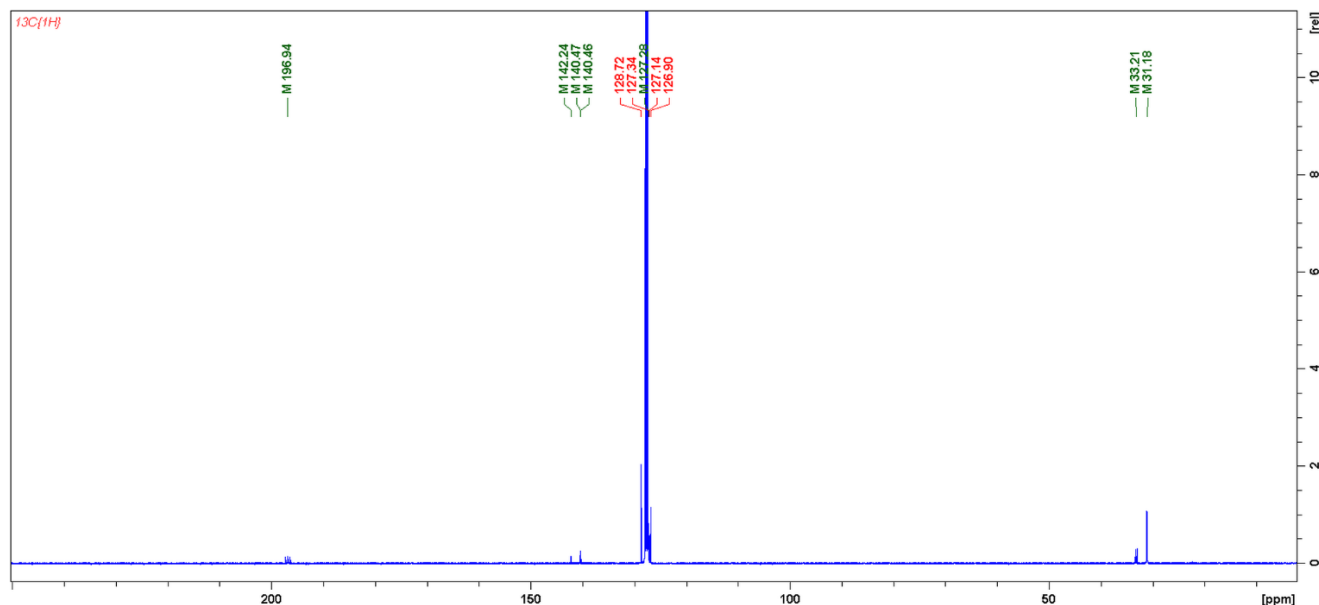

**Figure S128.**  $^{13}\text{C}\{^1\text{H}\}$  NMR (400 MHz,  $\text{C}_6\text{D}_6$ , 298 K) spectrum of isolated crystals of  $\text{PhPh(H)C=P-PtBu}_2$  (4e).

- 196.94 ppm, (dd),  $J_{\text{P-C}} = 44.9$  Hz,  $J_{\text{P-C}} = 39.5$  Hz,  $\text{PhPh(H)C=P-P}\{\text{C}(\text{CH}_3)_3\}_2$ ;
- 142.24 ppm, (d),  $J_{\text{P-C}} = 7.18$  Hz,  $\text{PhPh(H)C=P-P}\{\text{C}(\text{CH}_3)_3\}_2$  (*i*- $\text{C}_{\text{Ar}}$ );
- 140.47 ppm, (d),  $J_{\text{P-C}} = 1.5$  Hz,  $\text{PhPh(H)C=P-P}\{\text{C}(\text{CH}_3)_3\}_2$  (*i*- $\text{C}_{\text{Ar}}$ );
- 140.46 ppm, (dd),  $J_{\text{P-C}} = 15.8$  Hz,  $J_{\text{P-C}} = 12.4$  Hz,  $\text{PhPh(H)C=P-P}\{\text{C}(\text{CH}_3)_3\}_2$  (*i*- $\text{C}_{\text{Ar}}$ );
- 128.72 ppm, (s),  $\text{PhPh(H)C=P-P}\{\text{C}(\text{CH}_3)_3\}_2$  (*o*- $\text{C}_{\text{Ar}}$ );
- 127.34 ppm, (s),  $\text{PhPh(H)C=P-P}\{\text{C}(\text{CH}_3)_3\}_2$  (*o*- $\text{C}_{\text{Ar}}$ );
- 127.28 ppm, (d),  $J_{\text{P-C}} = 2.6$  Hz,  $\text{PhPh(H)C=P-P}\{\text{C}(\text{CH}_3)_3\}_2$  (*m*- $\text{C}_{\text{Ar}}$ );
- 126.90 ppm, (s),  $\text{PhPh(H)C=P-P}\{\text{C}(\text{CH}_3)_3\}_2$  (*m*- $\text{C}_{\text{Ar}}$ );
- 33.21 ppm, (dd),  $J_{\text{P-C}} = 27.7$  Hz,  $J_{\text{P-C}} = 2.27$  Hz,  $\text{PhPh(H)C=P-P}\{\text{C}(\text{CH}_3)_3\}_2$ ;
- 31.18 ppm, (dd),  $J_{\text{P-C}} = 13.8$  Hz,  $J_{\text{P-C}} = 5.0$  Hz,  $\text{PhPh(H)C=P-P}\{\text{C}(\text{CH}_3)_3\}_2$ ;

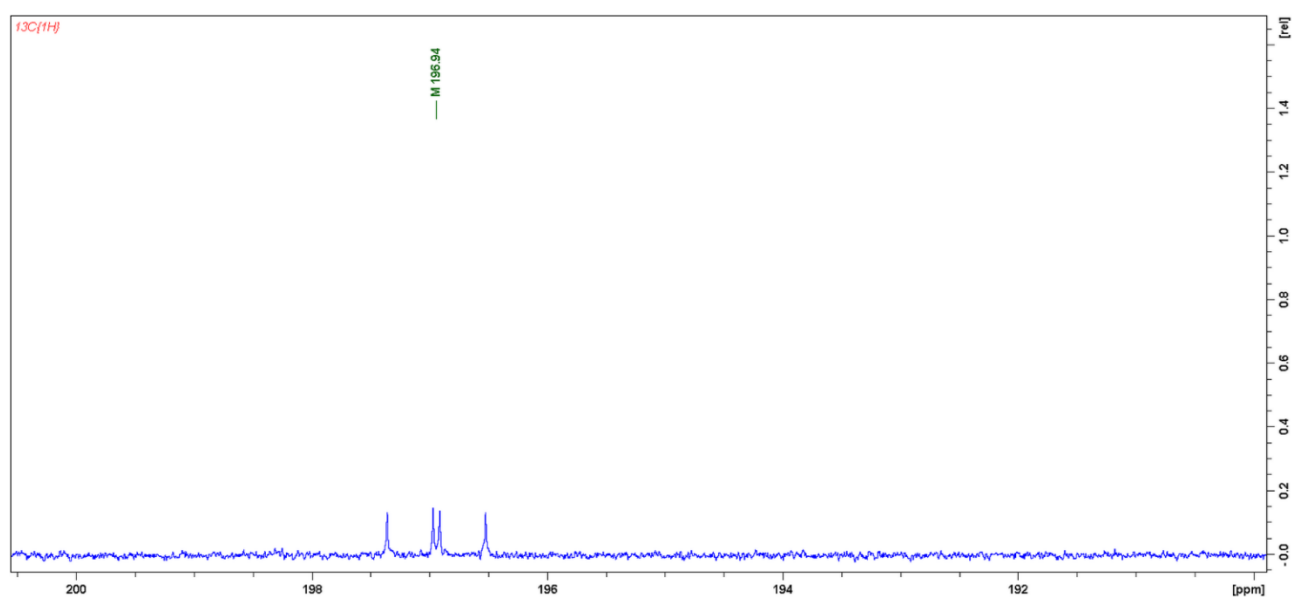

**Figure S129.**  $^{13}\text{C}\{^1\text{H}\}$  NMR (400 MHz,  $\text{C}_6\text{D}_6$ , 298 K) spectrum of isolated crystals of  $\text{PhPh(H)C=P-PtBu}_2$  (4e) in the range from 200 ppm to 190 ppm.

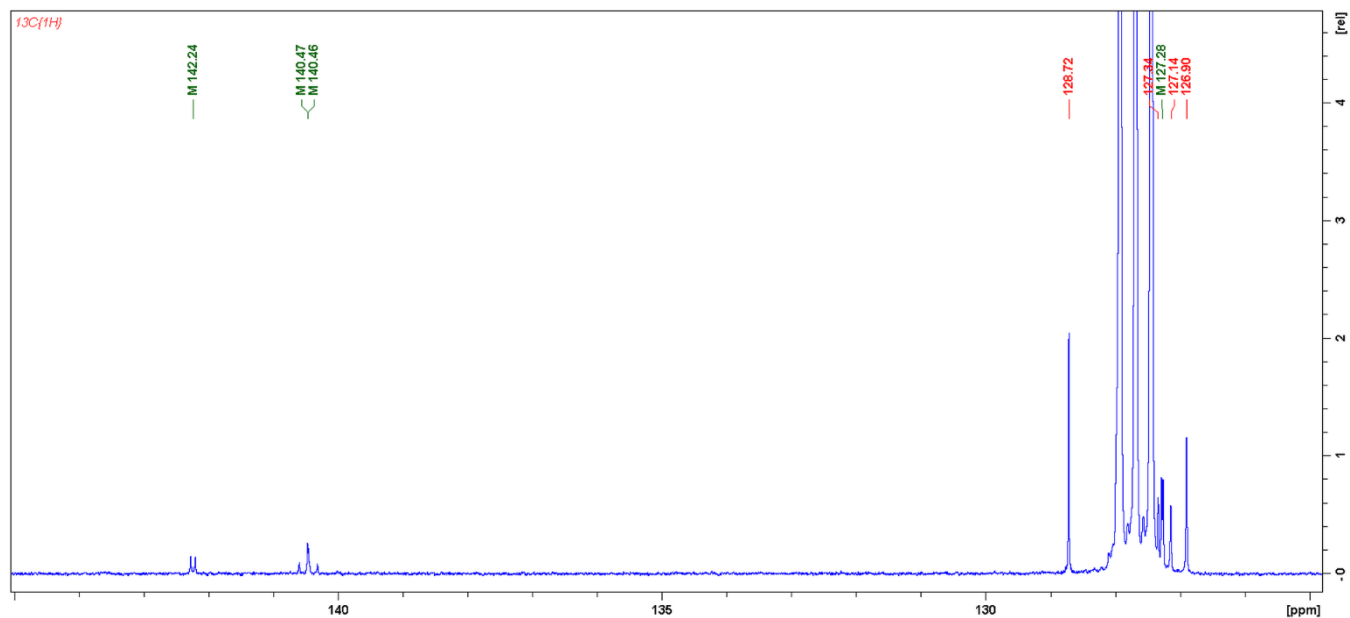

**Figure S130.** <sup>13</sup>C{<sup>1</sup>H} NMR (400 MHz, C<sub>6</sub>D<sub>6</sub>, 298 K) spectrum of isolated crystals of PhPh(H)C=P-PtBu<sub>2</sub> (4e) in the range from 145 ppm to 125 ppm.

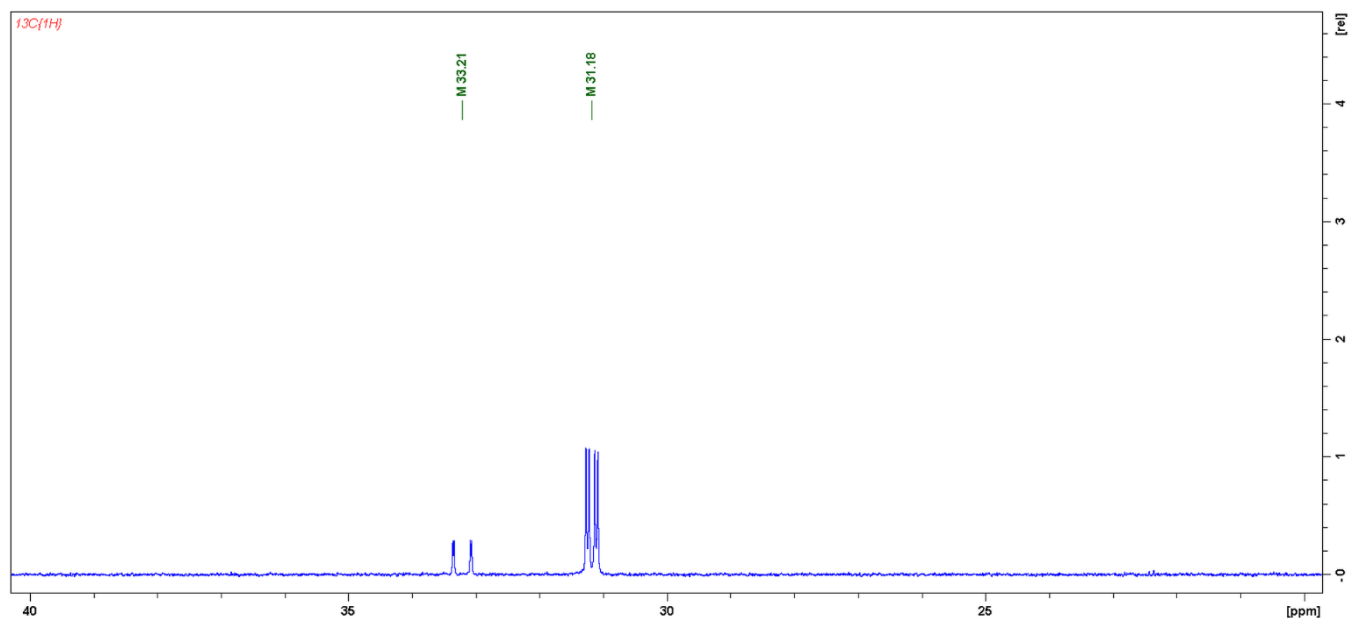

**Figure S131.** <sup>13</sup>C{<sup>1</sup>H} NMR (400 MHz, C<sub>6</sub>D<sub>6</sub>, 298 K) spectrum of isolated crystals of PhPh(H)C=P-PtBu<sub>2</sub> (4e) in the range from 40 ppm to 20 ppm.

### B.3. Decomposition of the isolated crystals of phosphanylphosphaalkenes

#### B.3.1. $(\text{Ph})_2\text{C}=\text{P}-\text{Pr}^t\text{Bu}_2$ (**3a**)

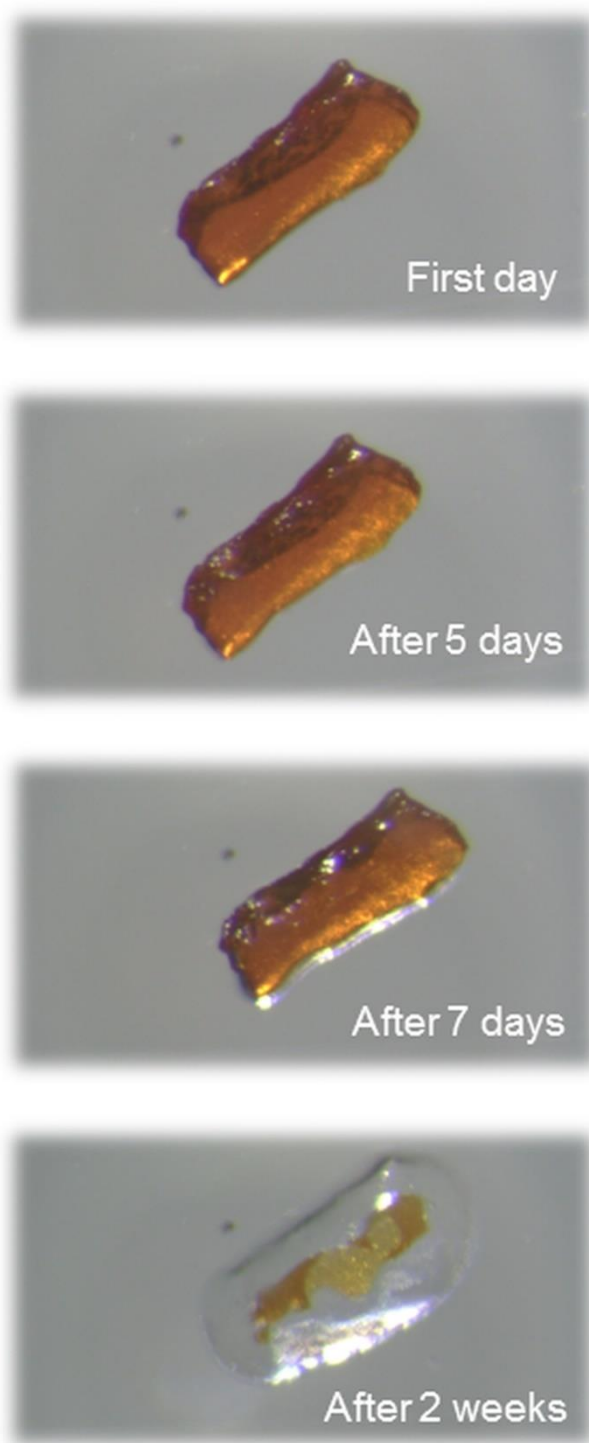

**Figure S132.** Decomposition of crystal 3a over time.

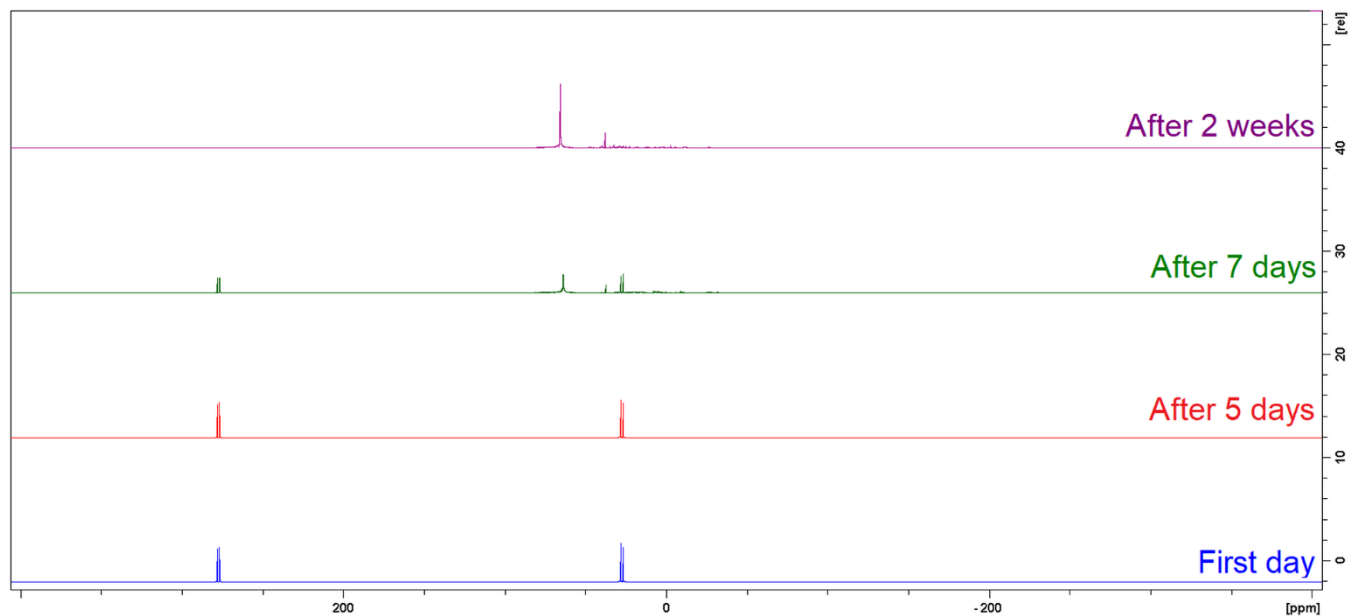

**Figure S133.**  $^{31}\text{P}\{^1\text{H}\}$  NMR (400 MHz,  $\text{C}_6\text{D}_6$ , 298 K) spectrum of decomposition of  $(\text{Ph})_2\text{C}=\text{P}-\text{PtBu}_2$  (**3a**) dissolved in  $\text{C}_6\text{D}_6$  and measured immediately after dissolving, after 5, 7 days and 2 weeks.

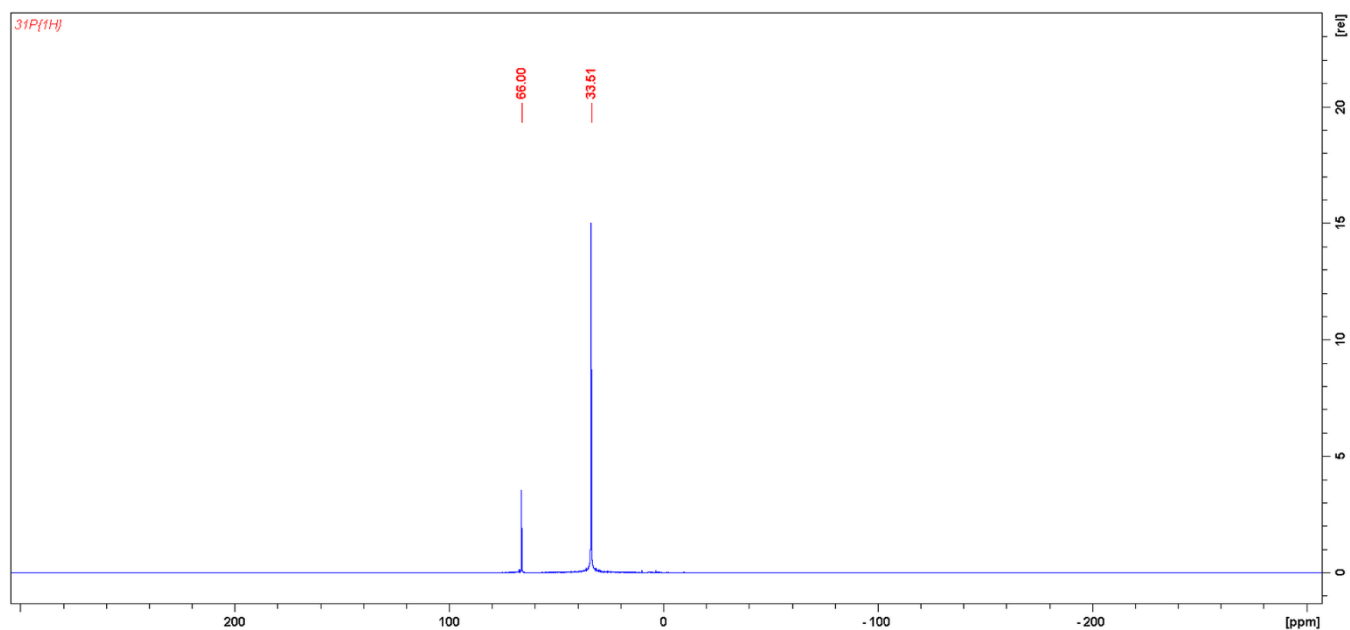

**Figure S134.**  $^{31}\text{P}\{^1\text{H}\}$  NMR (400 MHz,  $\text{C}_6\text{D}_6$ , 298 K) spectrum of  $(\text{Ph})_2\text{C}=\text{P}-\text{PtBu}_2$  (**3a**) crystals after 2 weeks in the air conditions.

- 66.00 ppm, (s),  $t\text{Bu}_2\text{PH}(\text{=O})$ ;
- 33.51 ppm, (s),  $\text{Ph}_2(\text{H})\text{C}-\text{PH}(\text{=O})(\text{OH})$ ;



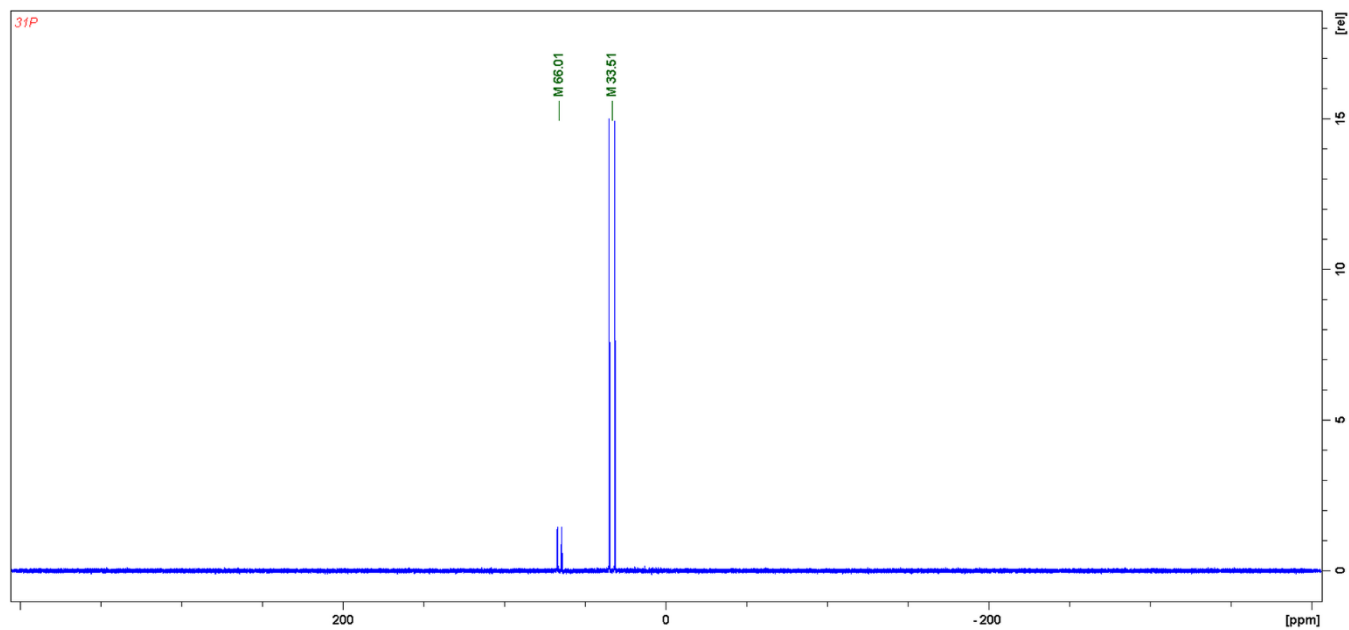

**Figure S135.**  $^{31}\text{P}$  NMR (400 MHz,  $\text{C}_6\text{D}_6$ , 298 K) spectrum of  $(\text{Ph})_2\text{C}=\text{P}-\text{P}t\text{Bu}_2$  (**3a**) crystals after 2 weeks in the air conditions.

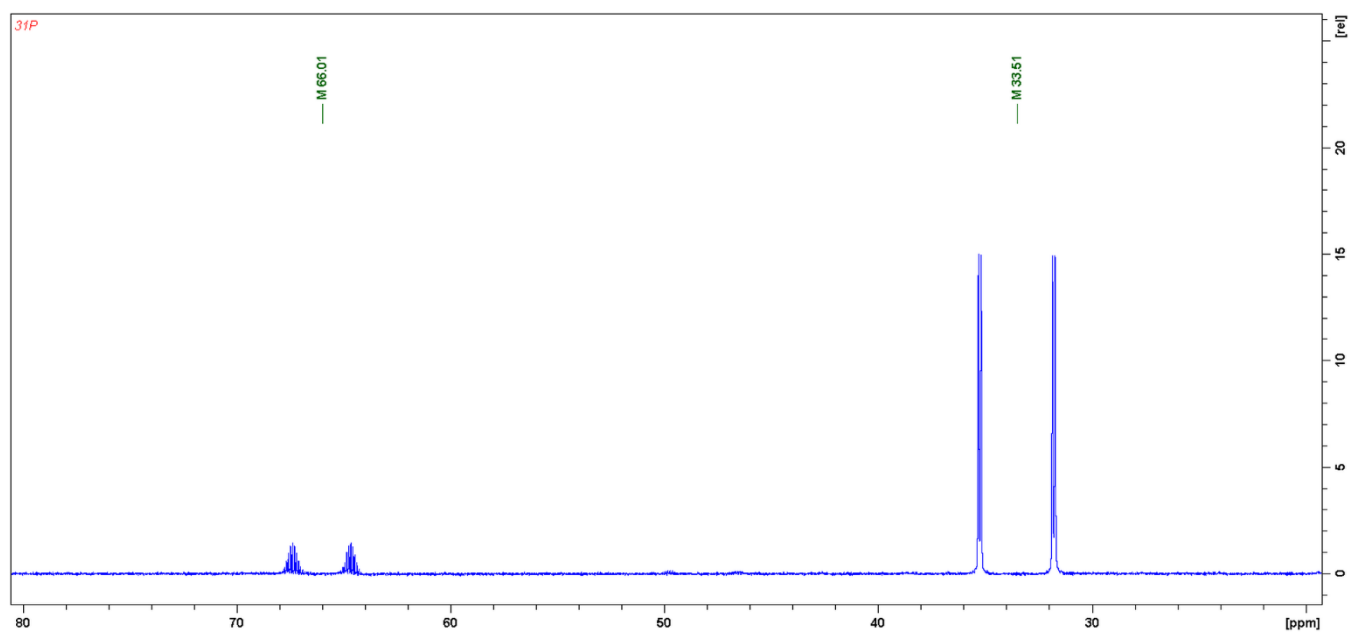

**Figure S136.**  $^{31}\text{P}$  NMR (400 MHz,  $\text{C}_6\text{D}_6$ , 298 K) spectrum of  $(\text{Ph})_2\text{C}=\text{P}-\text{P}t\text{Bu}_2$  (**3a**) crystals after 2 weeks in the air conditions in the range from 80 ppm to 20 ppm.

- 66.01 ppm, (doublet of multiplets),  $J_{\text{P-H}} = 441.7$  Hz,  $t\text{Bu}_2\text{PH}(=\text{O})$ ;
- 33.51 ppm, (dd),  $J_{\text{PH}} = 560.2$  Hz,  $J_{\text{P-H}} = 19.4$  Hz,  $\text{Ph}_2(\text{H})\text{C}-\text{PH}(=\text{O})(\text{OH})$ .

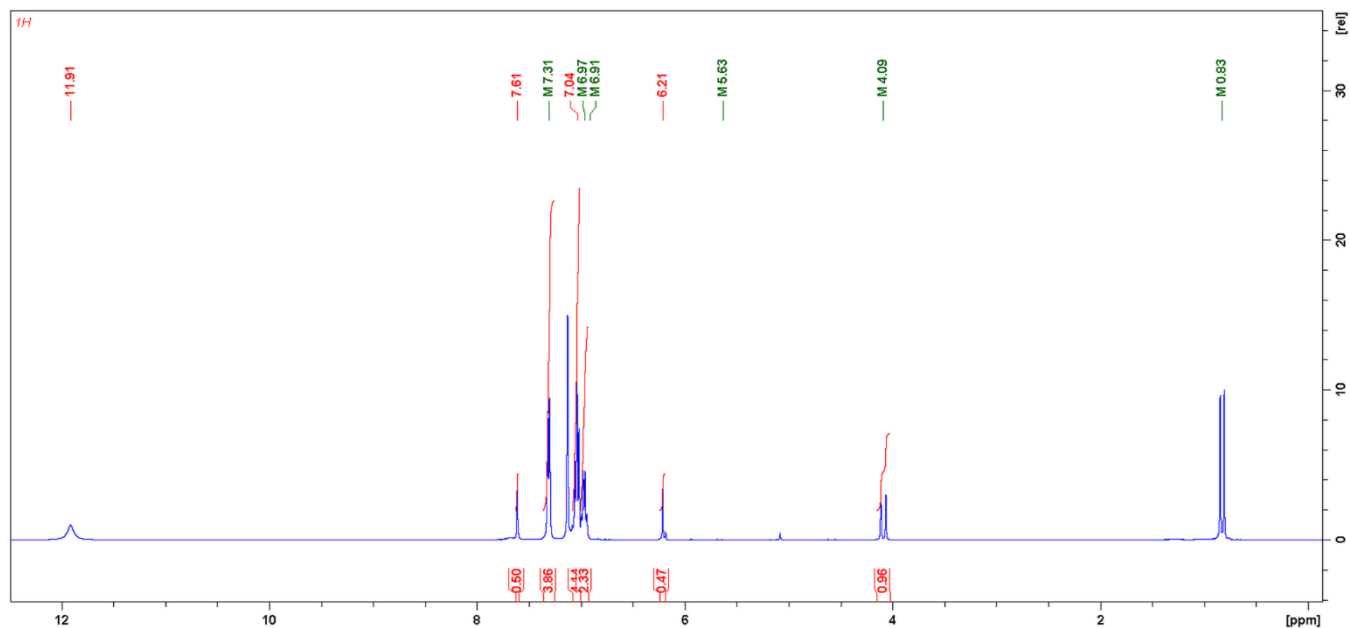

**Figure S137.**  $^1\text{H}$  NMR (400 MHz,  $\text{C}_6\text{D}_6$ , 298 K) spectrum of  $(\text{Ph})_2\text{C}=\text{P}-\text{PtBu}_2$  (**3a**) crystals after 2 weeks in the air conditions.

- 11.91 ppm, (broad s),  $\text{Ph}_2(\text{H})\text{C}-\text{PH}(=\text{O})(\text{OH})$ ;
- 7.31 ppm, (d), 4H,  $J_{\text{H-H}} = 7.6$  Hz,  $\text{Ph}_2(\text{H})\text{C}-\text{PH}(=\text{O})(\text{OH})$ , *o*- $\text{H}_{\text{Ar}}$ ;
- 7.04 ppm, (t), 4H,  $J_{\text{H-H}} = 7.6$  Hz,  $\text{Ph}_2(\text{H})\text{C}-\text{PH}(=\text{O})(\text{OH})$ , *m*- $\text{H}_{\text{Ar}}$ ;
- 6.97 ppm, (q), 2H,  $J_{\text{H-H}} = 6.7$  Hz,  $\text{Ph}_2(\text{H})\text{C}-\text{PH}(=\text{O})(\text{OH})$ , *p*- $\text{H}_{\text{Ar}}$ ;
- 6.91 ppm, (d), 1H,  $J_{\text{P-H}} = 560.2$  Hz,  $\text{Ph}_2(\text{H})\text{C}-\text{PH}(=\text{O})(\text{OH})$ ;
- 5.63 ppm, (d), 1H,  $J_{\text{P-H}} = 441.7$  Hz,  $t\text{Bu}_2\text{PH}(=\text{O})$ ;
- 4.09 ppm, (d), 1H,  $J_{\text{P-H}} = 19.4$  Hz,  $\text{Ph}_2(\text{H})\text{C}-\text{PH}(=\text{O})(\text{OH})$ ;
- 0.83 ppm, (d), 18H,  $J_{\text{P-H}} = 15.3$  Hz,  $t\text{Bu}_2\text{PH}(=\text{O})$ ;

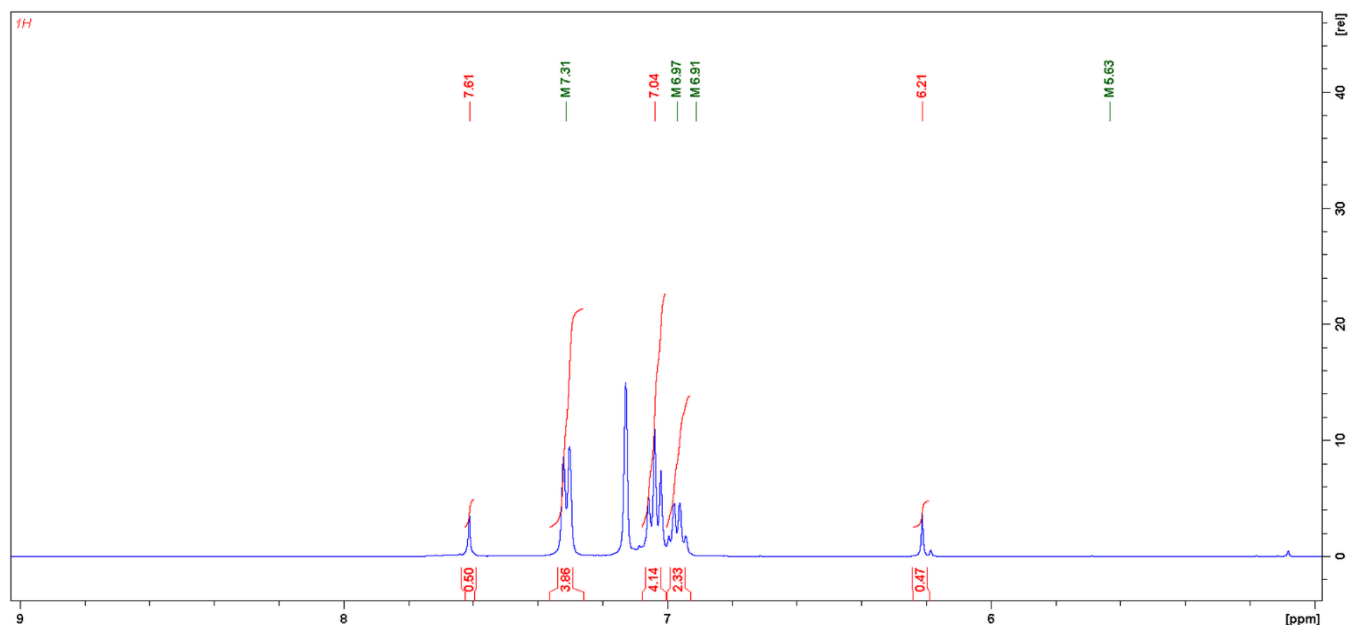

**Figure S138.**  $^1\text{H}$  NMR (400 MHz,  $\text{C}_6\text{D}_6$ , 298 K) spectrum of  $(\text{Ph})_2\text{C}=\text{P}-\text{PtBu}_2$  (**3a**) crystals after 2 weeks in the air conditions in the range from 9 ppm to 5 ppm.

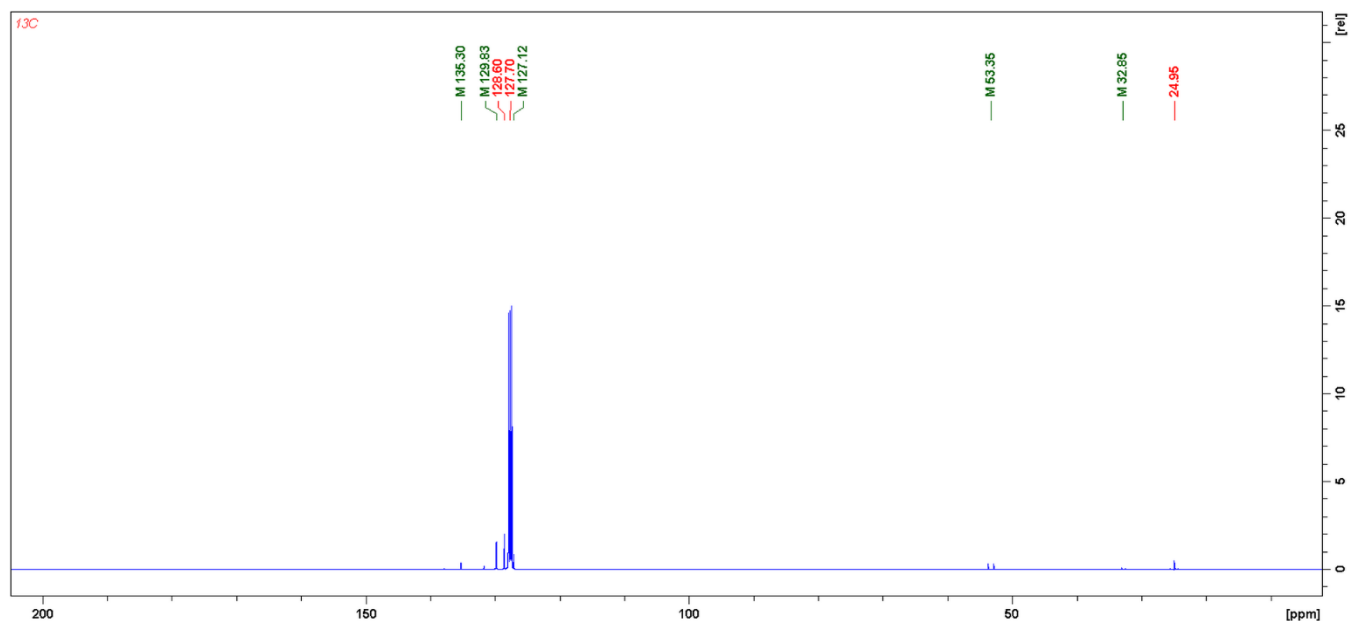

**Figure S139.**  $^{13}\text{C}\{^1\text{H}\}$  NMR (400 MHz,  $\text{C}_6\text{D}_6$ , 298 K) spectrum of  $(\text{Ph})_2\text{C}=\text{P}-\text{PtBu}_2$  (**3a**) crystals after 2 weeks in the air conditions.

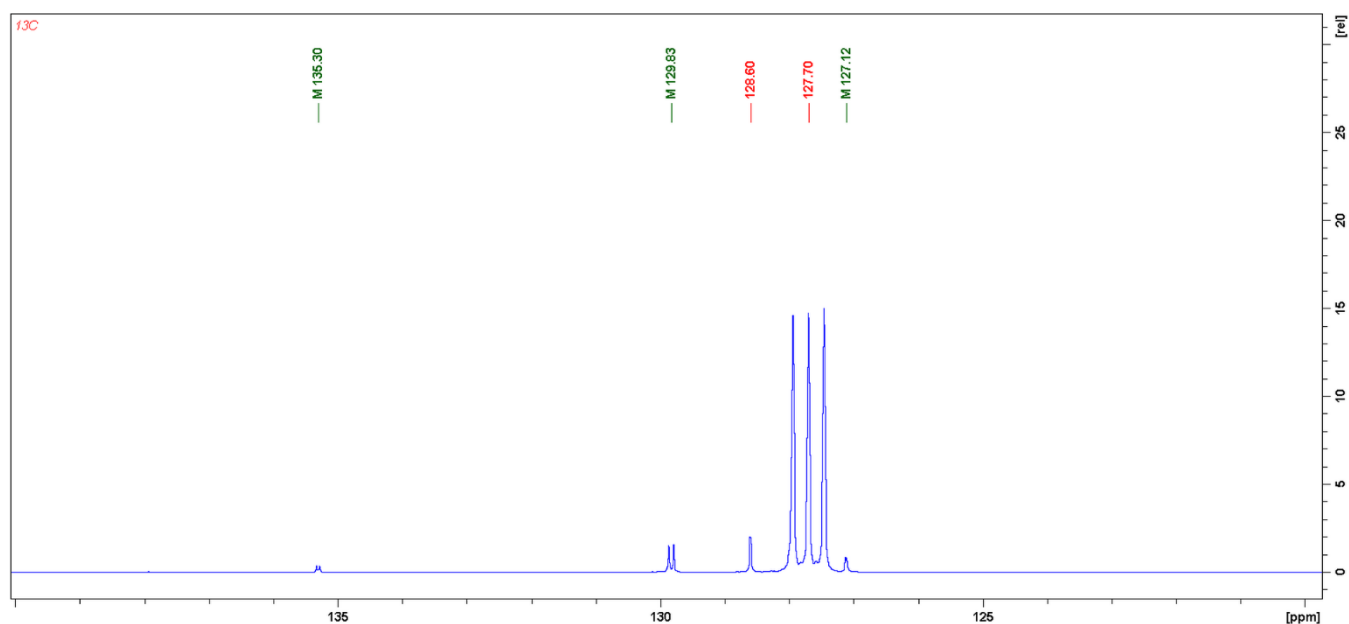

**Figure S140.**  $^{13}\text{C}\{^1\text{H}\}$  NMR (400 MHz,  $\text{C}_6\text{D}_6$ , 298 K) spectrum of  $(\text{Ph})_2\text{C}=\text{P}-\text{PtBu}_2$  (**3a**) crystals after 2 weeks in the air conditions in the range from 140 ppm to 120 ppm.

- 135.30 ppm, (d),  $J_{\text{P-C}} = 4.7$  Hz,  $\text{Ph}_2(\text{H})\text{C}-\text{PH}(=\text{O})(\text{OH})$ , *i*- $\text{C}_{\text{Ar}}$ ;
- 129.83 ppm, (d),  $J_{\text{P-C}} = 8.4$  Hz,  $\text{Ph}_2(\text{H})\text{C}-\text{PH}(=\text{O})(\text{OH})$ , *o*- $\text{C}_{\text{Ar}}$ ;
- 128.60 ppm, (s),  $\text{Ph}_2(\text{H})\text{C}-\text{PH}(=\text{O})(\text{OH})$ , *m*- $\text{C}_{\text{Ar}}$ ;
- 127.12 ppm, (d),  $J_{\text{P-C}} = 1.4$  Hz,  $\text{Ph}_2(\text{H})\text{C}-\text{PH}(=\text{O})(\text{OH})$ , *p*- $\text{C}_{\text{Ar}}$ ;

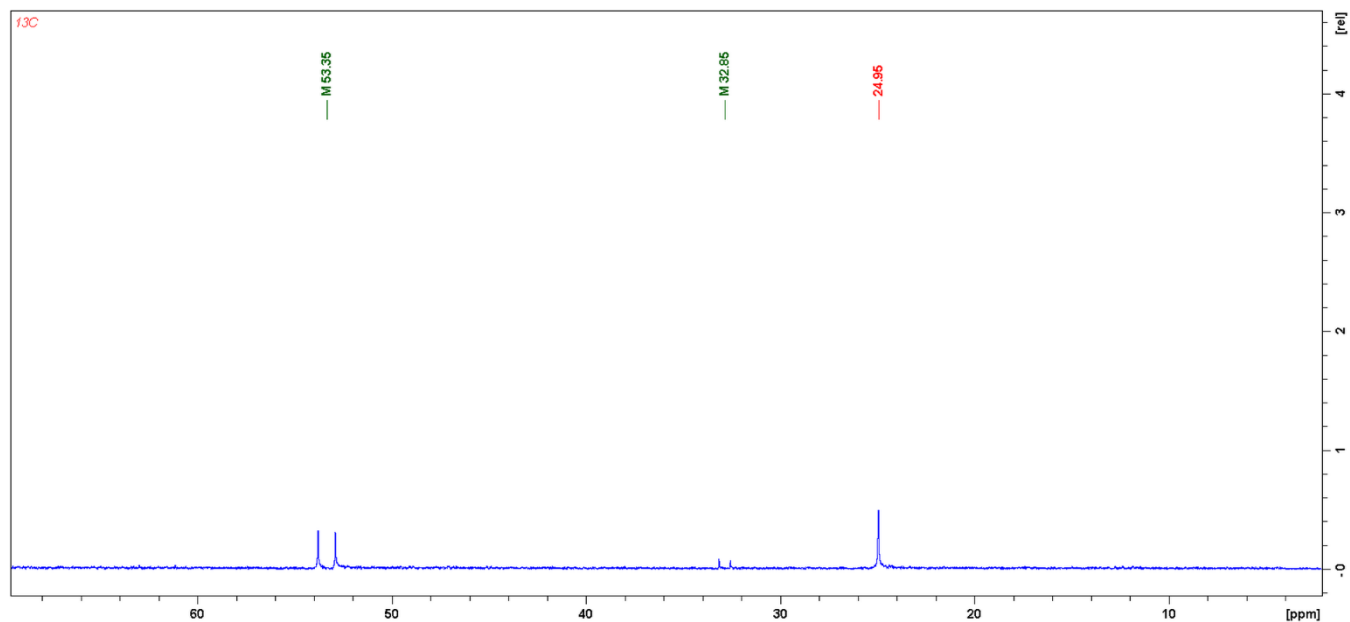

**Figure S141.**  $^{13}\text{C}\{^1\text{H}\}$  NMR (400 MHz,  $\text{C}_6\text{D}_6$ , 298 K) spectrum of  $(\text{Ph})_2\text{C}=\text{P}-t\text{Bu}_2$  (**3a**) crystals after 2 weeks in the air conditions in the range from 70 ppm to 0 ppm.

- 53.35 ppm, (d),  $J_{\text{P-C}} = 90.46$  Hz,  $\text{Ph}_2(\text{H})\text{C}-\text{PH}(=\text{O})(\text{OH})$ ;
- 32.85 ppm, (d),  $J_{\text{P-C}} = 60.1$  Hz,  $\{\text{CH}_3\}_3\text{C}\}_2\text{PH}(=\text{O})$ ;
- 24.95 ppm, (d),  $J_{\text{P-C}} = 1.8$  Hz,  $\{\text{CH}_3\}_3\text{C}\}_2\text{PH}(=\text{O})$ ;

### B.3.2. (Ph)(4-CN-Ph)C=P-P*t*Bu<sub>2</sub> (**3c**)

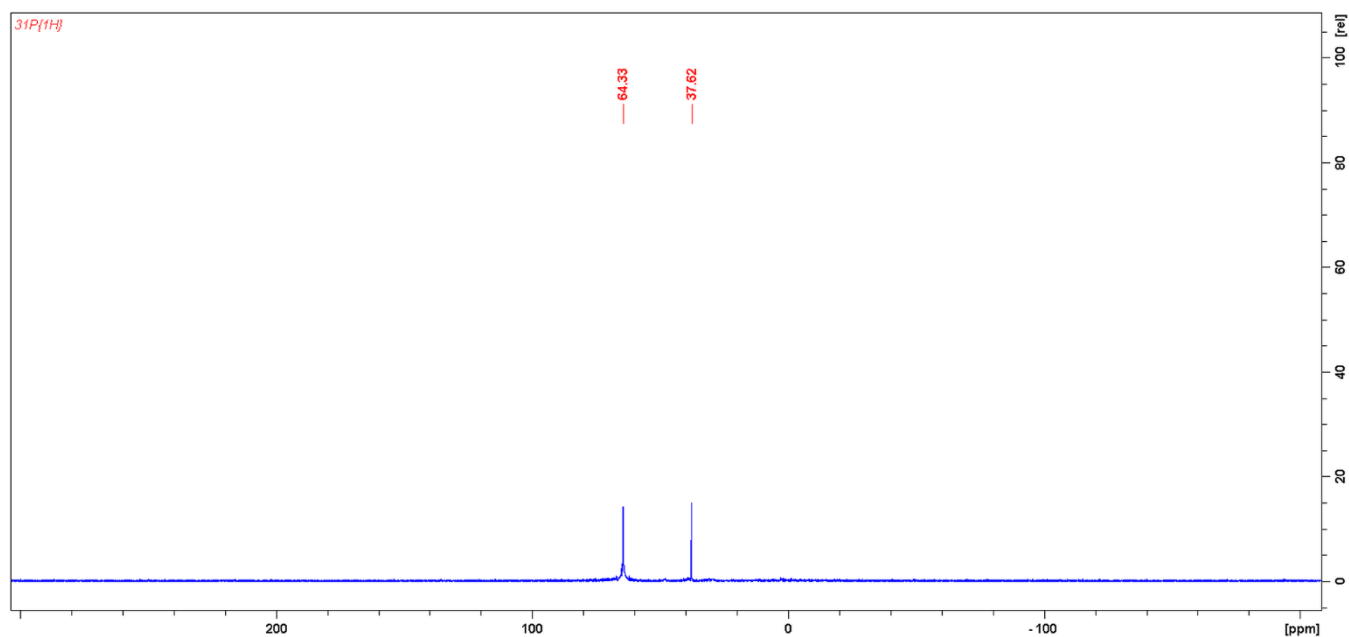

**Figure S142.**  $^{31}\text{P}\{^1\text{H}\}$  NMR (400 MHz,  $\text{C}_6\text{D}_6$ , 298 K) spectrum of (Ph)(4-CN-Ph)C=P-P*t*Bu<sub>2</sub> (**3c**) crystals after 2 weeks in the air condition.

- 64.33 ppm, (s), *t*Bu<sub>2</sub>PH(=O);
- 37.52 ppm, (s), (Ph)(4-CN-Ph)HC-PH(=O)(OH);

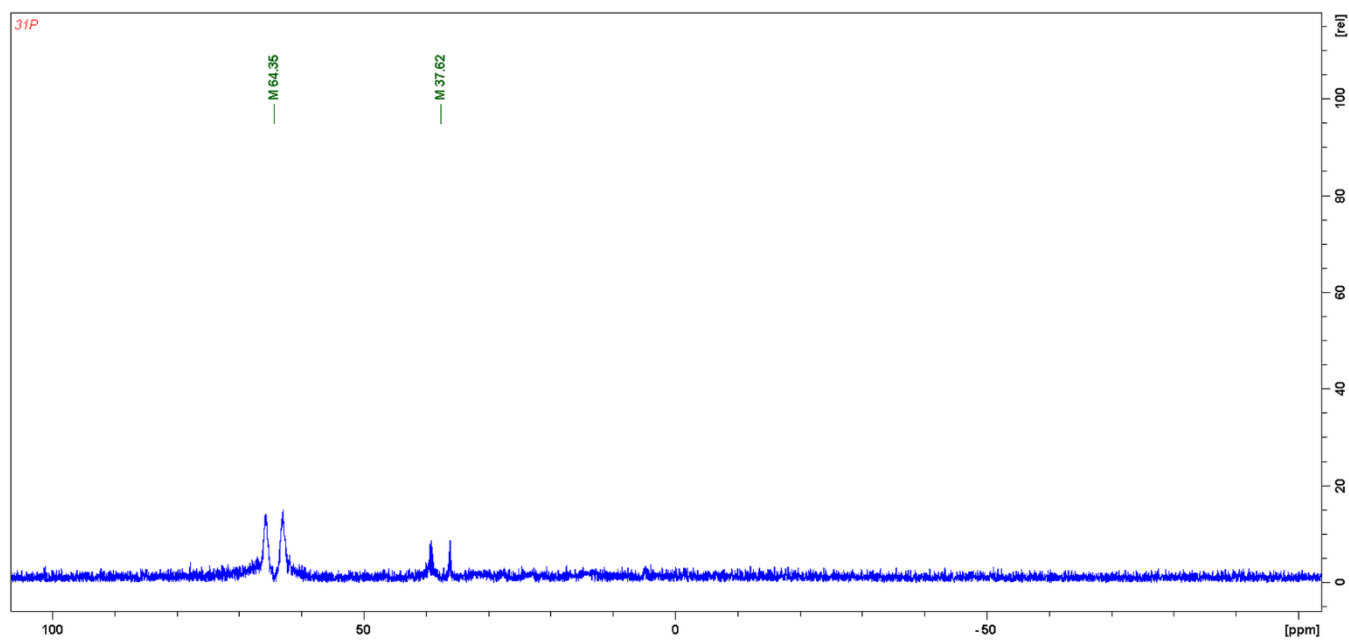

**Figure S143.**  $^{31}\text{P}$  NMR (400 MHz,  $\text{C}_6\text{D}_6$ , 298 K) spectrum of (Ph)(4-CN-Ph)C=P-P*t*Bu<sub>2</sub> (**3c**) crystals after 2 weeks in the air condition.

- 64.33 ppm, (doublet of multiplets),  $J_{\text{P-H}} = 445.7$  Hz, *t*Bu<sub>2</sub>PH(=O);
- 37.52 ppm, (doublet of multiplets),  $J_{\text{P-H}} = 505.9$  Hz, (Ph)(4-CN-Ph)HC-PH(=O)(OH);

### B.3.3. (4-CN-Ph)<sub>2</sub>C=P-P*t*Bu<sub>2</sub> (**3d**)

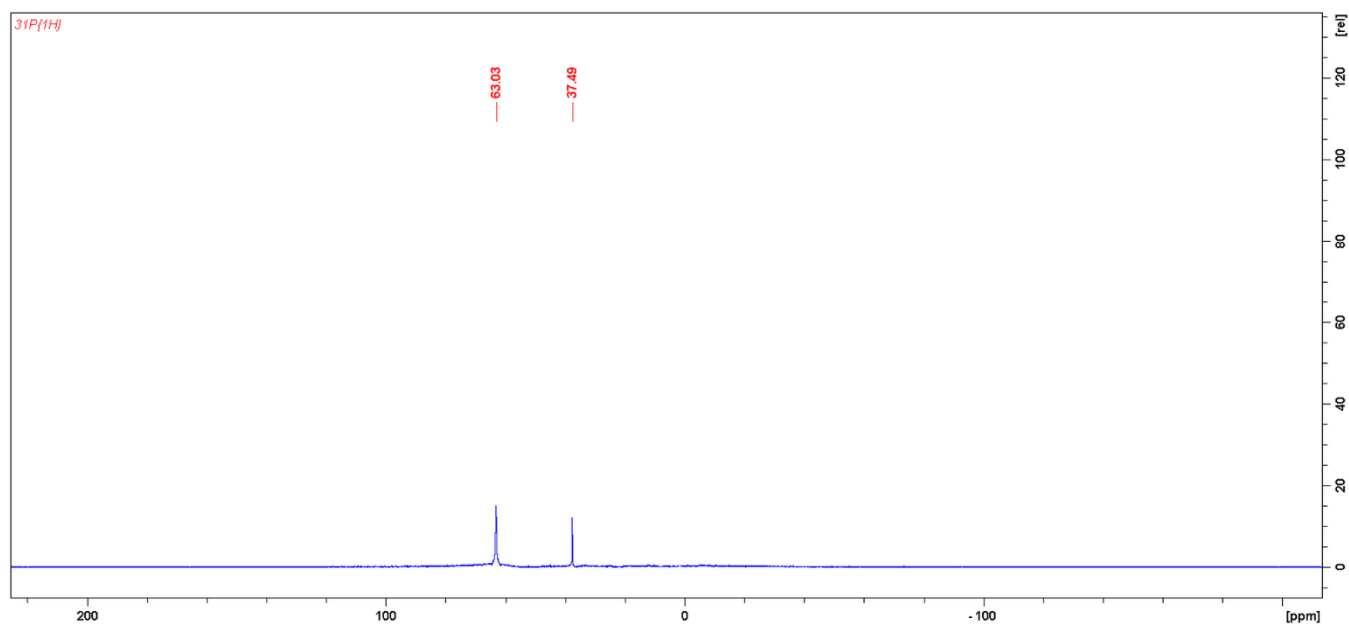

**Figure S144.** <sup>31</sup>P{<sup>1</sup>H} NMR (400 MHz, C<sub>6</sub>D<sub>6</sub>, 298 K) spectrum of (4-CN-Ph)<sub>2</sub>C=P-P*t*Bu<sub>2</sub> (**3d**) crystals after 2 weeks in the air conditions.

- 63.03 ppm, (s), *t*Bu<sub>2</sub>PH(=O);
- 37.49 ppm, (s), (4-CN-Ph)<sub>2</sub>(H)C-PH(=O)(OH);

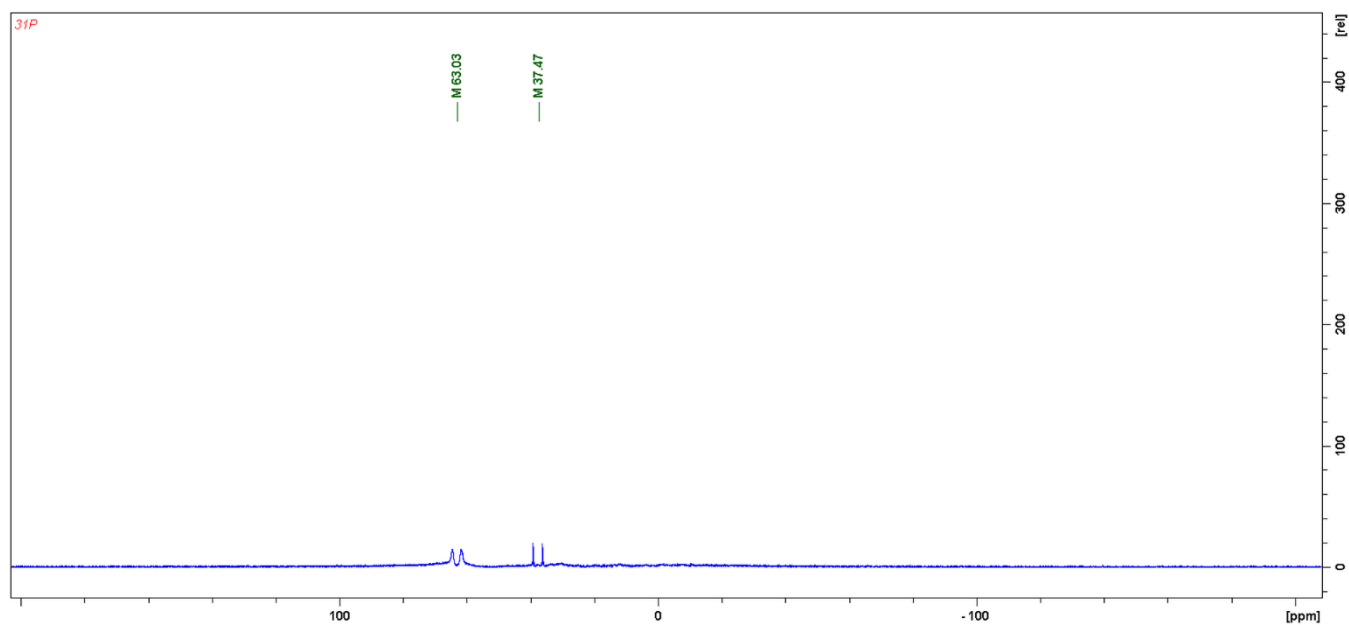

**Figure S145.** <sup>31</sup>P{<sup>1</sup>H} NMR (400 MHz, C<sub>6</sub>D<sub>6</sub>, 298 K) spectrum of (4-CN-Ph)<sub>2</sub>C=P-P*t*Bu<sub>2</sub> (**3d**) crystals after 2 weeks in the air conditions.

- 63.03 ppm, (d), *J*<sub>P-H</sub> = 440.9 Hz, *t*Bu<sub>2</sub>PH(=O);
- 37.49 ppm, (dd), *J*<sub>P-H</sub> = 560.3 Hz, *J*<sub>PH</sub> = 16.1 Hz, (4-CN-Ph)<sub>2</sub>(H)C-PH(=O)(OH);

### B.3.4. (4-MeO-Ph)<sub>2</sub>C=P-P*t*Bu<sub>2</sub> (**3e**)

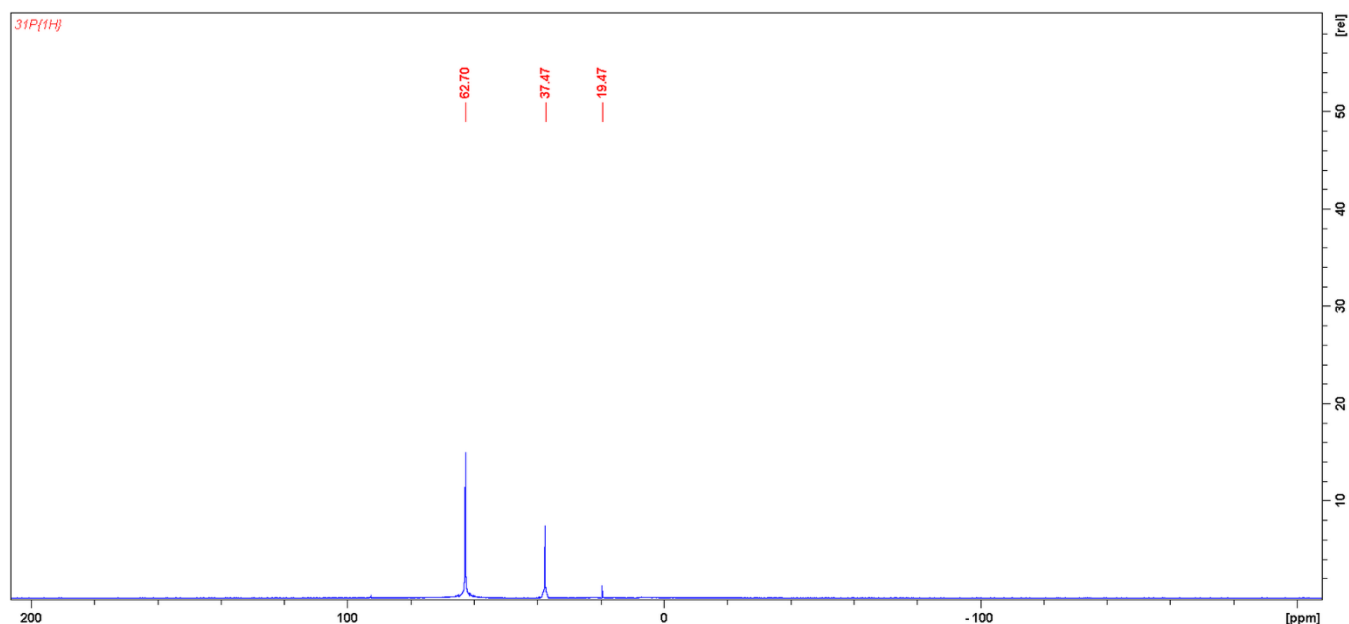

**Figure S146.** <sup>31</sup>P{<sup>1</sup>H} NMR (400 MHz, C<sub>6</sub>D<sub>6</sub>, 298 K) spectrum of (4-MeO-Ph)<sub>2</sub>C=P-P*t*Bu<sub>2</sub> (**3e**) crystals after 2 weeks in the air conditions.

- 62.70 ppm, (s), *t*Bu<sub>2</sub>PH(=O);
- 37.47 ppm, (s), (4-MeO-Ph)<sub>2</sub>(H)C-PH(=O)(OH);
- 19.47 ppm, (s), *t*Bu<sub>2</sub>PH;

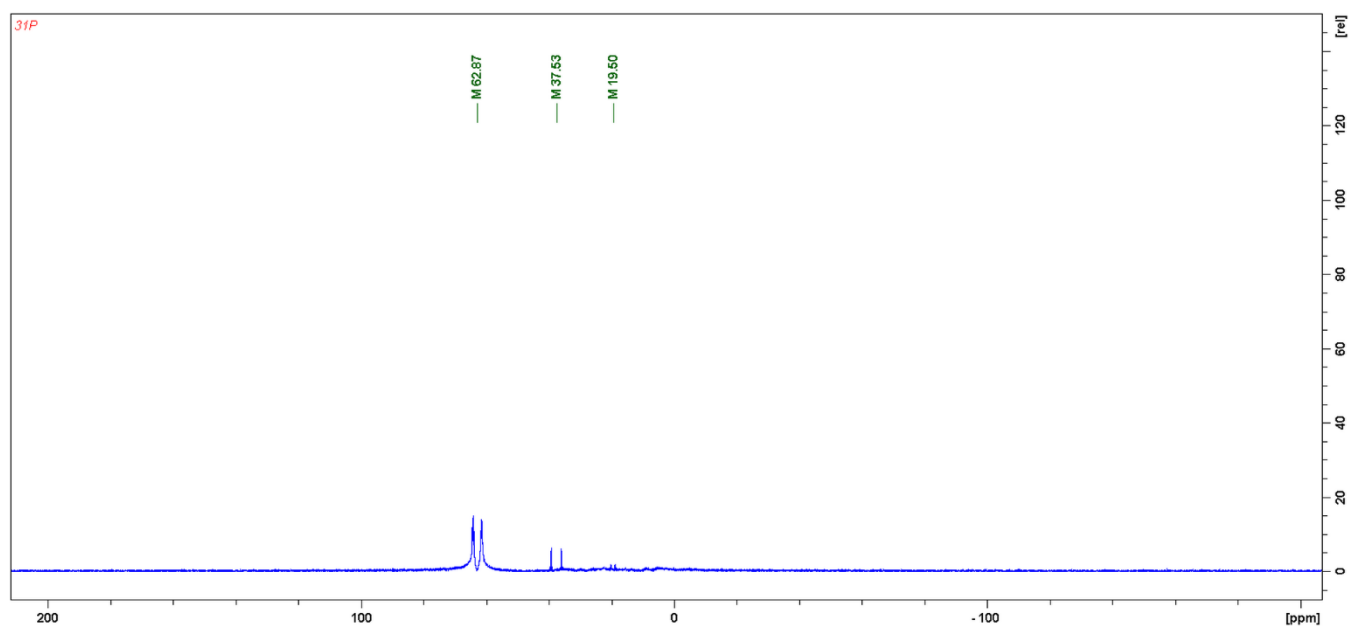

**Figure S147.** <sup>31</sup>P{<sup>1</sup>H}-NMR (400 MHz, C<sub>6</sub>D<sub>6</sub>, 298 K) spectrum of (4-MeO-Ph)<sub>2</sub>C=P-P*t*Bu<sub>2</sub> (**3e**) crystals after 2 weeks in the air conditions.

- 62.87 ppm, (doublet of multiplets),  $J_{P-H} = 425.6$  Hz, *t*Bu<sub>2</sub>PH(=O);
- 37.53 ppm, (dd),  $J_{PH} = 507.2$  Hz,  $J_{P-H} = 18.4$  Hz, (4-MeO-Ph)<sub>2</sub>(H)C-PH(=O)(OH);
- 19.5 ppm, (doublet of multiplets),  $J_{P-H} = 188.7$  Hz, *t*Bu<sub>2</sub>PH;

B.3.5.  $\{(Me)_2N-Ph\}(H)C=P-PtBu_2$  (**4d**)

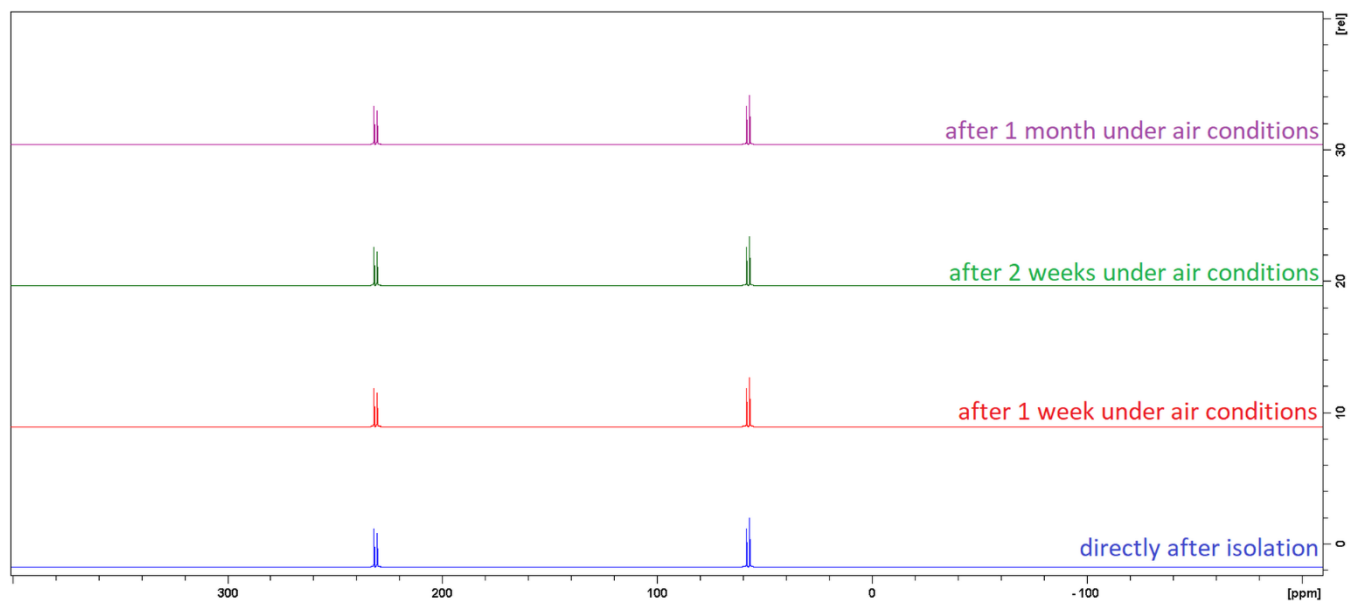

**Figure S148.**  $^{31}P\{^1H\}$  NMR (400 MHz,  $C_6D_6$ , 298 K) spectrum presented stability investigation of  $\{(Me)_2N-Ph\}(H)C=P-PtBu_2$  (**4d**) under air conditions.



B.3.6. PhPh(H)C=P-P*t*Bu<sub>2</sub> (**4e**)

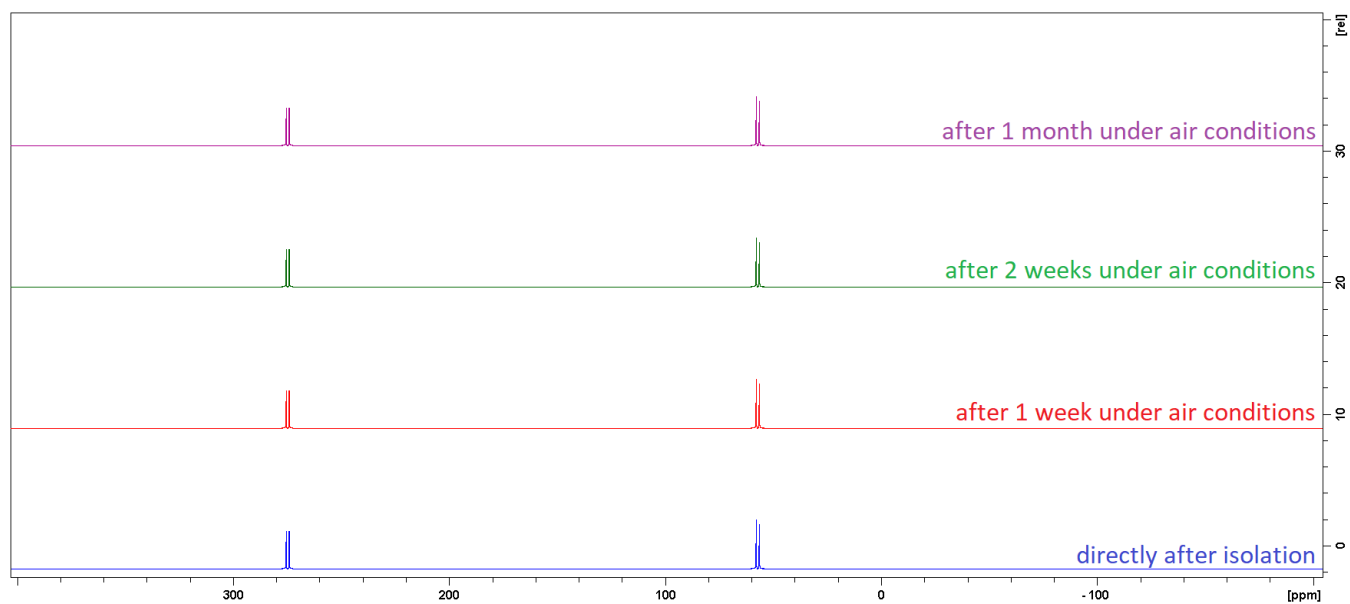

**Figure S149.** <sup>31</sup>P{<sup>1</sup>H} NMR (400 MHz, C<sub>6</sub>D<sub>6</sub>, 298 K) spectrum presented stability investigation of PhPh(H)C=P-P*t*Bu<sub>2</sub> (**4e**) under air conditions.

### B.3.7. Stability of (Ph)<sub>2</sub>C=P-P*t*Bu<sub>2</sub> (**3a**) in water

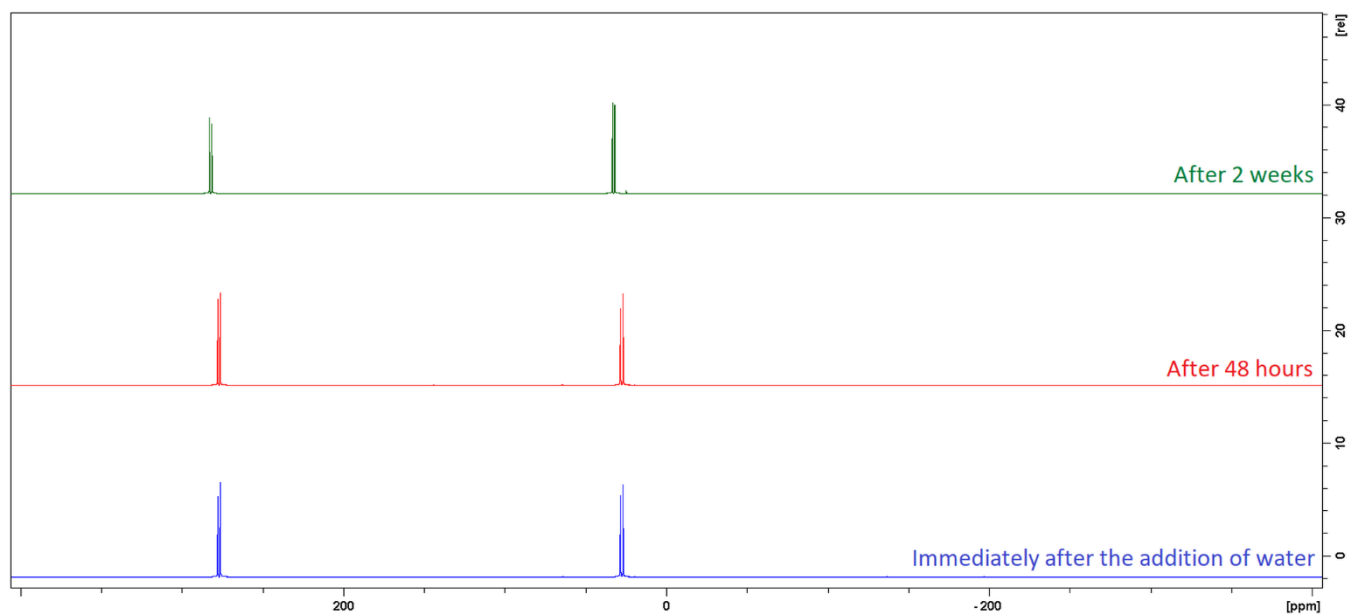

**Figure S150.** <sup>31</sup>P{<sup>1</sup>H} NMR (400 MHz, C<sub>6</sub>D<sub>6</sub>, 298 K) spectrum presented stability investigation of (Ph)<sub>2</sub>C=P-P*t*Bu<sub>2</sub> (**3a**) in water.

### PART C. Crystallographic data

The X-ray intensity data for **3a**, **3c**, **3d**, **3e**, **4d**, **4e**, and **5** were measured with an IPDS2T diffractometer equipped with an IPDS2T STOE image plate detector system and microfocus X-ray sources providing  $K\alpha$  radiation by high-grade multilayer X-ray mirror optics for Mo ( $\lambda = 0.71073 \text{ \AA}$ , **3e**, **3f** and **4e**) and Cu ( $\lambda = 1.54186 \text{ \AA}$ , **3a**, **3c**, **3d**, **4d**, **5**) wavelengths. The all measurements were carried out at 120 K. The structures of the compounds were solved by direct methods and refined against  $F^2$  with the Shelxs-2008 and Shelxl-2008 programs<sup>6</sup> run under WinGX.<sup>7</sup> Non-hydrogen atoms were refined with anisotropic displacement parameters. The isotropic displacement parameters of all hydrogens were fixed to  $1.2 U_{\text{eq}}$  for CH and CH<sub>2</sub> (1.5 times for methyl groups).

The crystallographic data for the structures of **3a**, **3c**, **3d**, **3e**, **3f**, **4d**, **4e**, and **5** reported in this paper have been deposited in the Cambridge Crystallographic Data Centre as supplementary publication No. CCDC 2077813-2077819 and 2087482. Copies of the data can be obtained free of charge upon application to the CCDC, 12 Union Road, Cambridge CB2 1EZ, UK (Fax: (+44) 1223-336-033; E mail: deposit@ccdc.cam.ac.uk).

**Table S1.** Crystallographic data for **3a**, **3c**, **3d**, and **3e**.

|                                                 | <b>3a</b>                                      | <b>3c</b>                                                     | <b>3d</b>                                                     | <b>3e</b>                                                     |
|-------------------------------------------------|------------------------------------------------|---------------------------------------------------------------|---------------------------------------------------------------|---------------------------------------------------------------|
| Empirical formula                               | C <sub>21</sub> H <sub>28</sub> P <sub>2</sub> | C <sub>22</sub> H <sub>27</sub> N <sub>1</sub> P <sub>2</sub> | C <sub>53</sub> H <sub>60</sub> N <sub>4</sub> P <sub>4</sub> | C <sub>23</sub> H <sub>32</sub> O <sub>2</sub> P <sub>2</sub> |
| Formula weight                                  | 684.74                                         | 367.38                                                        | 876.93                                                        | 402.42                                                        |
| Radiation source                                | Cu-K $\alpha$                                  | Cu-K $\alpha$                                                 | Cu-K $\alpha$                                                 | Mo-K $\alpha$                                                 |
| Crystallographic System                         | Monoclinic                                     | Orthorhombic                                                  | Monoclinic                                                    | Monoclinic                                                    |
| Space group                                     | <i>C2/c</i>                                    | <i>Pbcn</i>                                                   | <i>P2<sub>1</sub>/c</i>                                       | <i>P2<sub>1</sub>/n</i>                                       |
| <i>a</i> [Å]                                    | 15.2838(7)                                     | 24.4705(11)                                                   | 16.0860(3)                                                    | 10.1084(14)                                                   |
| <i>b</i> [Å]                                    | 10.1380(4)                                     | 9.0836(3)                                                     | 16.7747(3)                                                    | 20.209(3)                                                     |
| <i>c</i> [Å]                                    | 26.3114(11)                                    | 18.7680(7)                                                    | 18.1220(4)                                                    | 11.8485(17)                                                   |
| $\alpha$ [°]                                    | 90                                             | 90                                                            | 90                                                            | 90                                                            |
| $\beta$ [°]                                     | 101.444(4)                                     | 90                                                            | 93.719(2)                                                     | 110.326(10)                                                   |
| $\gamma$ [°]                                    | 90                                             | 90                                                            | 90                                                            | 90                                                            |
| <i>V</i> [Å <sup>3</sup> ]                      | 3995.8(3)                                      | 4171.8(3)                                                     | 4879.70(19)                                                   | 2269.7(6)                                                     |
| <i>Z</i>                                        | 8                                              | 8                                                             | 4                                                             | 4                                                             |
| Calculated Density [g·cm <sup>-3</sup> ]        | 1.138                                          | 1.170                                                         | 1.194                                                         | 1.178                                                         |
| <i>T</i> [K]                                    | 120(2)                                         | 120(2)                                                        | 120(2)                                                        | 120(2)                                                        |
| $\mu$ [mm <sup>-1</sup> ]                       | 1.935                                          | 1.904                                                         | 1.723                                                         | 0.2060                                                        |
| Final R indices                                 | 0.0410                                         | 0.0686                                                        | 0.0430                                                        | 0.7070                                                        |
| [ <i>I</i> >2 $\sigma$ ( <i>I</i> )]            | 0.1054                                         | 0.1708                                                        | 0.1049                                                        | 0.1759                                                        |
| R indices (all data)                            | 0.0496                                         | 0.1064                                                        | 0.0500                                                        | 0.1332                                                        |
| [ <i>I</i> >2 $\sigma$ ( <i>I</i> )] (all data) | 0.1107                                         | 0.2090                                                        | 0.1089                                                        | 0.2019                                                        |
| CCDC                                            | 2077813                                        | 2077814                                                       | 2077816                                                       | 2077815                                                       |

**Table S2.** Crystallographic data for **3f**, **4d**, **4e**, and **5**.

|                                                 | <b>3f</b>                                       | <b>4d</b>                                                     | <b>4e</b>                                      | <b>5</b>                                                                       |
|-------------------------------------------------|-------------------------------------------------|---------------------------------------------------------------|------------------------------------------------|--------------------------------------------------------------------------------|
| Empirical formula                               | C <sub>19</sub> H <sub>32</sub> P <sub>2</sub>  | C <sub>34</sub> H <sub>55</sub> N <sub>2</sub> P <sub>4</sub> | C <sub>21</sub> H <sub>28</sub> P <sub>2</sub> | C <sub>24</sub> H <sub>72</sub> Li <sub>8</sub> O <sub>8</sub> Si <sub>8</sub> |
| Formula weight                                  | 322.38                                          | 618.7                                                         | 342.37                                         | 769.05                                                                         |
| Radiation source                                | Mo-K $\alpha$                                   | Cu-K $\alpha$                                                 | Mo-K $\alpha$                                  | Cu-K $\alpha$                                                                  |
| Crystallographic System                         | Orthorhombic                                    | Monoclinic                                                    | Monoclinic                                     | Tetragonal                                                                     |
| Space group                                     | <i>P2<sub>1</sub>2<sub>1</sub>2<sub>1</sub></i> | <i>C2/c</i>                                                   | <i>I2/a</i>                                    | <i>I-4</i>                                                                     |
| <i>a</i> [Å]                                    | 10.1040(2)                                      | 40.670(2)                                                     | 23.6882(16)                                    | 13.6438(4)                                                                     |
| <i>b</i> [Å]                                    | 12.2845(4)                                      | 6.1403(2)                                                     | 5.9485(2)                                      | 13.6438(4)                                                                     |
| <i>c</i> [Å]                                    | 15.8640(4)                                      | 35.368(2)                                                     | 29.8384(19)                                    | 13.3861(4)                                                                     |
| $\alpha$ [°]                                    | 90                                              | 90                                                            | 90                                             | 90                                                                             |
| $\beta$ [°]                                     | 90                                              | 122.345(4)                                                    | 111.433(5)                                     | 90                                                                             |
| $\gamma$ [°]                                    | 90                                              | 90                                                            | 90                                             | 90                                                                             |
| <i>V</i> [Å <sup>3</sup> ]                      | 1969.08(9)                                      | 7462.0(7)                                                     | 3913.7(4)                                      | 2491.87(16)                                                                    |
| <i>Z</i>                                        | 4                                               | 8                                                             | 8                                              | 2                                                                              |
| Calculated Density [g·cm <sup>-3</sup> ]        | 1.087                                           | 1.101                                                         | 1.162                                          | 1.025                                                                          |
| <i>T</i> [K]                                    | 120(2)                                          | 120(2)                                                        | 120(2)                                         | 120(2)                                                                         |
| $\mu$ [mm <sup>-1</sup> ]                       | 0.215                                           | 2.033                                                         | 0.221                                          | 2.283                                                                          |
| Final R indices                                 | 0.0319                                          | 0.0812                                                        | 0.0686                                         | 0.0790                                                                         |
| [ <i>I</i> >2 $\sigma$ ( <i>I</i> )]            | 0.0831                                          | 0.1899                                                        | 0.2010                                         | 0.2049                                                                         |
| R indices (all data)                            | 0.0354                                          | 0.1802                                                        | 0.1111                                         | 0.0862                                                                         |
| [ <i>I</i> >2 $\sigma$ ( <i>I</i> )] (all data) | 0.0848                                          | 0.2331                                                        | 0.2208                                         | 0.2209                                                                         |
| CCDC                                            | 2087482                                         | 2077817                                                       | 2077818                                        | 2077819                                                                        |

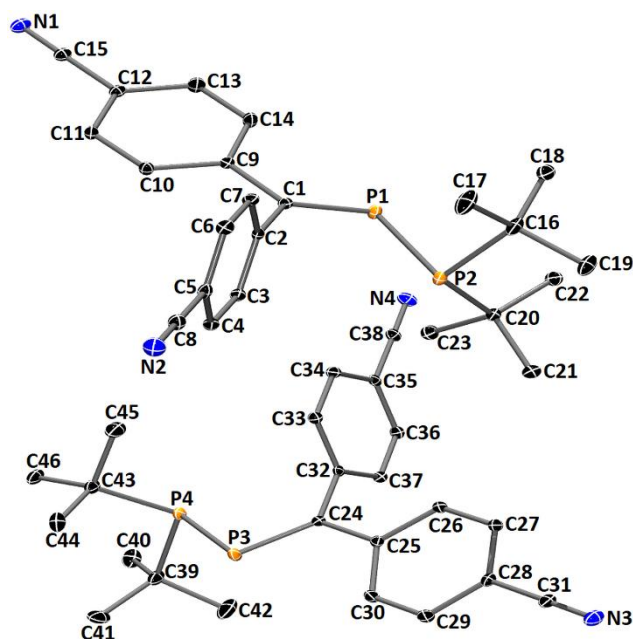

**Figure S151.** X-ray crystal structure of (4-CN-Ph)<sub>2</sub>C=P-*t*Bu<sub>2</sub> (**3d**) (the independent part of the unit cell; ellipsoids are drawn at the 50% probability level, hydrogen atoms are omitted and carbon atoms are drawn as sphere for clarity). Important distances (Å) and angles (deg): C1-P1 1.697(2), P1-P2 2.222(8), C24-P3 1.691(2), P3-P4 2.2184(8); C1-P1-P2 104.90(7), C24-P3-P4 103.92(7).

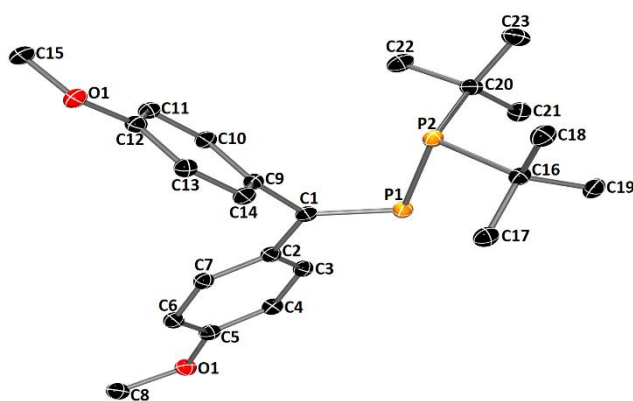

**Figure S152.** X-ray crystal structure of (4-MeO-Ph)<sub>2</sub>C=P-*t*Bu<sub>2</sub> (**3e**) (ellipsoids are drawn at the 50% probability level, hydrogen atoms are omitted and carbon atoms are drawn as sphere for clarity). Important distances (Å) and angles (deg): C1-P1 1.707(3), P1-P2 2.2114(12); C1-P1-P2 103.65(12).

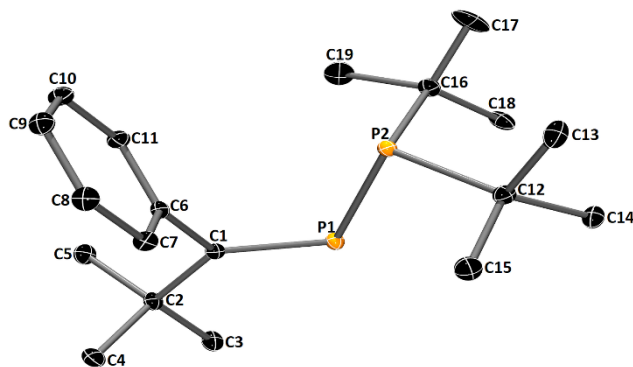

**Figure S153.** X-ray crystal structure of *t*Bu(Ph)C=P-*t*Bu<sub>2</sub> (**3e**) (ellipsoids are drawn at the 50% probability level, hydrogen atoms are omitted and carbon atoms are drawn as sphere for clarity). Important distances (Å) and angles (deg): C1-P1 1.6936(16), P1-P2 2.2245(6); C1-P1-P2 103.38(6).

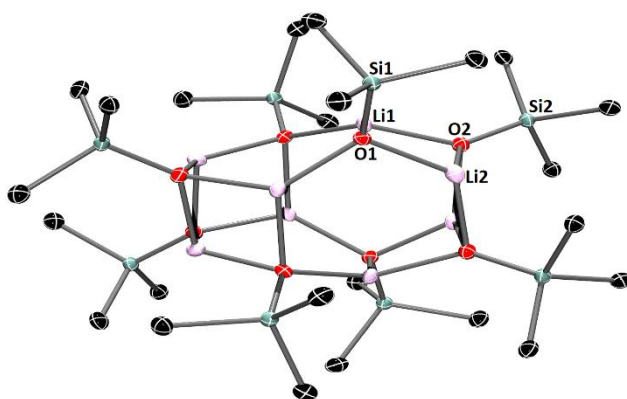

**Figure S154.** X-ray crystal structure of [LiOSiMe<sub>3</sub>]<sub>8</sub> (**5**) (ellipsoids are drawn at the 50% probability level, hydrogen atoms are omitted and carbon atoms are drawn as sphere for clarity). Important distances (Å) and angles (deg): O1-Si1 1.615(6), O2-Si2 1.606(7), O1-Li1 1.896(19), O1-Li2 1.903(18), O2-Li1 1.91(2), O2-Li2 1.876(17); Li1-O1-Li2 79.0(7), Li1-O2-Li2 80.3(8).

## PART E. DFT calculations

### E.1. General methods

All calculations presented in the paper were performed using the Gaussian 09<sup>8</sup> program package. Molecular geometries of all compounds were optimized using density functional theory at the TPSSSTPSS functional by Tao *et al*<sup>9</sup> with 6-31+G(d,p) basis set for: C, H, N, Cl, O, Si, Li, P, and LANL2DZ basis set for Ti. The TPSSSTPSS exchange-correlation functional has been chosen, as it has good overall performance for the description of kinetic and thermodynamic parameters of reactions. By adding GD3BJ keyword that includes D3 version of Grimme dispersion with Becke-Johnson<sup>10</sup> damping into calculations it also accounts well for long-range and dispersion interactions. Molecular geometries were energy-optimized and the most stable (the lowest energy) conformer was identified during the potential energy surface scanning. Nature of the final gas-phase geometries as local minima (no imaginary frequencies) or transition states (one imaginary frequency) on the potential energy surface was then validated by harmonic frequency calculations at the same level of theory. Values of calculated energies, enthalpies and Gibbs free-energies derived from thermochemical calculations were corrected for the zero-point energy (ZPE). Scans of potential energy surface along the *t*Bu<sub>2</sub>PP/RR'C=O, Ti/O=CRR' and C=O bonds were performed to establish local minima corresponding to transition products and confirm proposed mechanism of the reaction. Local maxima related to transition states were also established and validated by IRC calculations (to confirm that a located saddle points lie on the minimum energy path between assumed minima) and used to determine energy barriers between respective transformations. Values of energy barriers  $\Delta G^\ddagger$  and  $\Delta H^\ddagger$  of reactions **3a-3j** were determined as the difference between energy of rate-determining transition state and rate-determining intermediate as described.<sup>11</sup>

Molecular geometries of [(BDI\*)Ti(Cl){ $\eta^2$ -P-*Pt*Bu<sub>2</sub>}] (**1**), **3a-3j** and respective ketones were re-optimized and geometries of **4a-4e** and [(BDI\*)Ti(Cl){ $\eta^2$ -P(SiMe<sub>3</sub>)-*Pt*Bu<sub>2</sub>}] were optimized using density functional theory at the  $\omega$ B97XD functional<sup>10, 12, 13</sup> with 6-31+G(d,p) basis set before calculating properties of these species (NMR shifts and Fukui Functions). Theoretical <sup>31</sup>P NMR shifts of **3a-3j** and **4a-4e** were determined by calculating NMR shielding tensors using Gauge-Independent Atomic Orbital (GIAO)<sup>14</sup> method at the MN12SX<sup>15</sup>/cc-pvdz level of theory including presence of a solvent (benzene) using the CPCM polarizable conductor calculation model.<sup>16</sup> Condensed Fukui functions<sup>17</sup> and dual descriptors<sup>17, 18</sup> were determined using optimized structures to single point calculations on **1**, [(BDI\*)Ti(Cl){ $\eta^2$ -P(SiMe<sub>3</sub>)-*Pt*Bu<sub>2</sub>}] and ketones for *N*, *N-1* and *N+1* electron states at  $\omega$ B97XD/DefTZVP<sup>19, 20</sup> for **1**, [(BDI\*)Ti(Cl){ $\eta^2$ -P(SiMe<sub>3</sub>)-*Pt*Bu<sub>2</sub>}] and  $\omega$ B97XD/6-31+G(d,p) level of theory for ketones. Condensed to atom parameters were calculated using partial charges derived *via* Hirshfeld population analysis.

**Table S3.** Experimental and calculated  $^{31}\text{P}\{^1\text{H}\}$  NMR shifts for the formed phosphanylphosphaalkenes.

| Phosphanylphosphaalkenes | $^{31}\text{P}\{^1\text{H}\}$ NMR-exp. |              |                       | $^{31}\text{P}\{^1\text{H}\}$ NMR-theor. |            |
|--------------------------|----------------------------------------|--------------|-----------------------|------------------------------------------|------------|
|                          | P(1) [ppm]                             | P(2) [ppm]   | $J_{\text{P-P}}$ [Hz] | P(1) [ppm]                               | P(2) [ppm] |
| <b>3a</b>                | 277.32                                 | 27.39        | 228.9                 | 278.26                                   | 30.99      |
| <b>3b</b>                | 297.17                                 | 9.57         | 228.4                 | 297.43                                   | 2.07       |
| <b>3c_E</b>              | 303.89                                 | 28.98        | 228.9                 | 306.88                                   | 28.83      |
| <b>3c_Z</b>              | 286.27                                 | 27.77        | 228.9                 | 288.40                                   | 27.19      |
| <b>3d</b>                | 311.26                                 | 29.40        | 232.5                 | 321.03                                   | 30.26      |
| <b>3e</b>                | 258.28                                 | 28.28        | 228.9                 | 254.30                                   | 30.93      |
| <b>3f_E</b>              | 265.96                                 | 21.31        | 216.9                 | 268.83                                   | 20.12      |
| <b>3f_Z</b>              | 261.05                                 | 16.15        | 230.4                 | 256.58                                   | 16.70      |
| <b>3g</b>                | 234.73                                 | 23.14        | 228.9                 | 236.65                                   | 22.11      |
| <b>3h</b>                | 221.02                                 | 19.51        | 228.8                 | 219.62                                   | 16.76      |
| <b>3i_E</b>              | 263.63                                 | 21.91        | 234.9                 | 262.57                                   | 23.52      |
| <b>3i_Z</b>              | 253.06                                 | 24.65        | 222.8                 | 255.49                                   | 24.02      |
| <b>3j_E</b>              | 225.87                                 | 17.00        | 232.9                 | 224.88                                   | 17.18      |
| <b>3j_Z</b>              | 232.48                                 | 18.52        | 232.9                 | 232.63                                   | 19.50      |
| <b>4a_E</b>              | 254.39                                 | 52.82        | 220.8                 | 254.39                                   | 50.63      |
| <b>4a_Z</b>              | 249.40                                 | 12.85        | 212.8                 | 249.21                                   | 12.63      |
| <b>4b_E</b>              | 256.25                                 | 52.23        | 220.8                 | 255.34                                   | 50.08      |
| <b>4b_Z</b>              | 251.24                                 | 13.17        | 212.8                 | 251.29                                   | 16.16      |
| <b>4c_E</b>              | 266.61                                 | 56.72        | 220.8                 | 264.64                                   | 52.49      |
| <b>4c_Z</b>              | not observed                           | not observed | not observed          | 268.00                                   | 12.09      |
| <b>4d_E</b>              | 231.17                                 | 57.73        | 224.9                 | 230.41                                   | 63.45      |
| <b>4d_Z</b>              | not observed                           | not observed | not observed          | 229.63                                   | 19.85      |
| <b>4e_E</b>              | 274.72                                 | 57.13        | 224.9                 | 281.10                                   | 58.14      |
| <b>4e_Z</b>              | not observed                           | not observed | not observed          | 228.31                                   | 18.14      |



**Table S4.** Selected computational parameters obtained for considered systems (in atomic units A.U.):  $\epsilon_0$  - electronic energy;  $\epsilon_0 + \dots$  - sum of electronic and:  $E_{\text{zpe}}$  - zero-point energies,  $E_{\text{therm}}$  - thermal energies,  $H$  - thermal enthalpies,  $G$  - thermal free energies calculated at TPSS/6-31+G(d,p) [TPSS/LANL2DZ for Ti] level of theory. Values of  $\Delta H$  and  $\Delta G$  were calculated as the difference between energy of given transition state/intermediate or products and substrates (**1** and respective ketone).

| Substrates                                     |                            |                                      |                                        |                         |                         |                                      |                                      |
|------------------------------------------------|----------------------------|--------------------------------------|----------------------------------------|-------------------------|-------------------------|--------------------------------------|--------------------------------------|
| Compound                                       | $E_{\text{electr}}$ [A.U.] | $\epsilon_0 + E_{\text{ZPE}}$ [A.U.] | $\epsilon_0 + E_{\text{therm}}$ [A.U.] | $\epsilon_0 + H$ [A.U.] | $\epsilon_0 + G$ [A.U.] | $\Delta H$ [kcal mol <sup>-1</sup> ] | $\Delta G$ [kcal mol <sup>-1</sup> ] |
| 1                                              | -2756.748730               | -2755.870773                         | -2755.818193                           | -2755.817249            | -2755.952186            | -                                    | -                                    |
| (Ph) <sub>2</sub> C=O (3a)                     | -576.804227                | -576.615676                          | -576.604657                            | -576.603713             | -576.653632             | -                                    | -                                    |
| 9-fluorenone (3b)                              | -575.607850                | -575.440898                          | -575.431082                            | -575.430138             | -575.476274             | -                                    | -                                    |
| (Ph)(4-CN-Ph)C=O (3c)                          | -669.067353                | -668.880585                          | -668.867673                            | -668.866729             | -668.921430             | -                                    | -                                    |
| (4-CN-Ph) <sub>2</sub> C=O (3d)                | -761.329100                | -761.144129                          | -761.129331                            | -761.128386             | -761.187795             | -                                    | -                                    |
| (4-MeO-Ph) <sub>2</sub> C=O (3e)               | -805.909108                | -805.656488                          | -805.640181                            | -805.639237             | -805.701418             | -                                    | -                                    |
| <i>t</i> Bu(Ph)C=O (3f)                        | -502.981595                | -502.762110                          | -502.749873                            | -502.748929             | -502.801997             | -                                    | -                                    |
| Me <sub>2</sub> C=O (3g)                       | -193.205228                | -193.122707                          | -193.117135                            | -193.116190             | -193.151963             | -                                    | -                                    |
| Cyclohexanone (3h)                             | -309.979720                | -309.830773                          | -309.824136                            | -309.823192             | -309.861339             | -                                    | -                                    |
| Me(Ph)C=O (3i)                                 | -385.005760                | -384.869848                          | -384.861830                            | -384.860886             | -384.902834             | -                                    | -                                    |
| <i>cyclo</i> -PrMeC=O (3j)                     | -270.622260                | -270.504781                          | -270.498094                            | -270.497150             | -270.535365             | -                                    | -                                    |
| [(BDI*)Ti(Cl)(μ <sub>2</sub> -O)] <sub>2</sub> | -3667.011357               | -3665.739078                         | -3665.661895                           | -3665.660951            | -3665.846223            | -                                    | -                                    |
| Formation of 3a                                |                            |                                      |                                        |                         |                         |                                      |                                      |
| Compound                                       | $E_{\text{electr}}$ [A.U.] | $\epsilon_0 + E_{\text{ZPE}}$ [A.U.] | $\epsilon_0 + E_{\text{therm}}$ [A.U.] | $\epsilon_0 + H$ [A.U.] | $\epsilon_0 + G$ [A.U.] | $\Delta H$ [kcal mol <sup>-1</sup> ] | $\Delta G$ [kcal mol <sup>-1</sup> ] |
| TS1                                            | -3333.543647               | -3332.475563                         | -3332.411768                           | -3332.410824            | -3332.566603            | 6.49                                 | 25.11                                |
| II                                             | -3333.566908               | -3332.498405                         | -3332.435040                           | -3332.434096            | -3332.589349            | -8.41                                | 10.55                                |
| TS2                                            | -3333.550495               | -3332.483334                         | -3332.419367                           | -3332.418423            | -3332.575538            | 1.63                                 | 19.39                                |
| 3a                                             | -1500.108057               | -1499.678736                         | -1499.653113                           | -1499.652169            | -1499.734600            | -39.50                               | -33.23                               |
| Formation of 3b                                |                            |                                      |                                        |                         |                         |                                      |                                      |
| Compound                                       | $E_{\text{electr}}$ [A.U.] | $\epsilon_0 + E_{\text{ZPE}}$ [A.U.] | $\epsilon_0 + E_{\text{therm}}$ [A.U.] | $\epsilon_0 + H$ [A.U.] | $\epsilon_0 + G$ [A.U.] | $\Delta H$ [kcal mol <sup>-1</sup> ] | $\Delta G$ [kcal mol <sup>-1</sup> ] |
| TS1                                            | -3332.345641               | -3331.300647                         | -3331.236919                           | -3331.235975            | -3331.394539            | 7.31                                 | 21.72                                |
| II                                             | -3332.387966               | -3331.343114                         | -3331.278745                           | -3331.277801            | -3331.439957            | -19.48                               | -7.36                                |
| TS2                                            | -3331.061988               | -3331.306390                         | -3331.242609                           | -3331.241665            | -3331.401609            | 3.66                                 | 17.19                                |
| 3b                                             | -1498.916061               | -1498.507926                         | -1498.483457                           | -1498.482513            | -1498.561712            | -42.01                               | -36.09                               |
| Formation of Z-3c                              |                            |                                      |                                        |                         |                         |                                      |                                      |
| Compound                                       | $E_{\text{electr}}$ [A.U.] | $\epsilon_0 + E_{\text{ZPE}}$ [A.U.] | $\epsilon_0 + E_{\text{therm}}$ [A.U.] | $\epsilon_0 + H$ [A.U.] | $\epsilon_0 + G$ [A.U.] | $\Delta H$ [kcal mol <sup>-1</sup> ] | $\Delta G$ [kcal mol <sup>-1</sup> ] |
| TS1                                            | -3425.801373               | -3424.736391                         | -3424.669843                           | -3424.668899            | -3424.833818            | 9.66                                 | 25.49                                |
| II                                             | -3425.832789               | -3424.766083                         | -3424.700728                           | -3424.699784            | -3424.859765            | -10.12                               | 8.87                                 |
| TS2                                            | -3425.816070               | -3424.750788                         | -3424.684755                           | -3424.683811            | -3424.846532            | 0.11                                 | 17.34                                |
| Z-3c                                           | -1592.373550               | -1591.946022                         | -1591.918434                           | -1591.917490            | -1592.008632            | -40.98                               | -37.22                               |
| Formation of E-3c                              |                            |                                      |                                        |                         |                         |                                      |                                      |
| Compound                                       | $E_{\text{electr}}$ [A.U.] | $\epsilon_0 + E_{\text{ZPE}}$ [A.U.] | $\epsilon_0 + E_{\text{therm}}$ [A.U.] | $\epsilon_0 + H$ [A.U.] | $\epsilon_0 + G$ [A.U.] | $\Delta H$ [kcal mol <sup>-1</sup> ] | $\Delta G$ [kcal mol <sup>-1</sup> ] |
| TS1                                            | -3425.801416               | -3424.736298                         | -3424.669830                           | -3424.668886            | -3424.833410            | 9.66                                 | 25.75                                |
| II                                             | -3425.834087               | -3424.767168                         | -3424.700973                           | -3424.700029            | -3424.864483            | -10.28                               | 5.85                                 |
| TS2                                            | -3425.817367               | -3424.751839                         | -3424.685943                           | -3424.684999            | -3424.847081            | -0.65                                | 16.99                                |

| <i>E</i> -3c              | -1592.373062               | -1591.945502                         | -1591.917949                           | -1591.917005            | -1592.004427            | -40.66                               | -34.53                               |
|---------------------------|----------------------------|--------------------------------------|----------------------------------------|-------------------------|-------------------------|--------------------------------------|--------------------------------------|
| Formation of 3d           |                            |                                      |                                        |                         |                         |                                      |                                      |
| Compound                  | $E_{\text{electr}}$ [A.U.] | $\epsilon_0 + E_{\text{ZPE}}$ [A.U.] | $\epsilon_0 + E_{\text{therm}}$ [A.U.] | $\epsilon_0 + H$ [A.U.] | $\epsilon_0 + G$ [A.U.] | $\Delta H$ [kcal mol <sup>-1</sup> ] | $\Delta G$ [kcal mol <sup>-1</sup> ] |
| TS1                       | -3518.064129               | -3517.000819                         | -3516.932399                           | -3516.931455            | -3517.100871            | 9.08                                 | 25.04                                |
| I1                        | -3518.099878               | -3517.034963                         | -3516.966781                           | -3516.965836            | -3517.133998            | -12.94                               | 3.83                                 |
| TS2                       | -3518.082024               | -3517.018253                         | -3516.950417                           | -3516.949473            | -3517.116290            | -2.46                                | 15.17                                |
| 3d                        | -1684.637380               | -1684.211522                         | -1684.182081                           | -1684.181137            | -1684.273200            | -42.25                               | -36.07                               |
| Formation of 3e           |                            |                                      |                                        |                         |                         |                                      |                                      |
| Compound                  | $E_{\text{electr}}$ [A.U.] | $\epsilon_0 + E_{\text{ZPE}}$ [A.U.] | $\epsilon_0 + E_{\text{therm}}$ [A.U.] | $\epsilon_0 + H$ [A.U.] | $\epsilon_0 + G$ [A.U.] | $\Delta H$ [kcal mol <sup>-1</sup> ] | $\Delta G$ [kcal mol <sup>-1</sup> ] |
| TS1                       | -3562.643329               | -3561.512310                         | -3561.442535                           | -3561.441591            | -3561.613514            | 9.54                                 | 25.67                                |
| I1                        | -3562.667753               | -3561.535290                         | -3561.466506                           | -3561.465562            | -3561.633290            | -5.81                                | 13.01                                |
| TS2                       | -3562.650177               | -3561.518739                         | -3561.449394                           | -3561.448450            | -3561.619847            | 5.15                                 | 21.62                                |
| 3e                        | -1729.211092               | -1728.717918                         | -1728.686886                           | -1728.685942            | -1728.781542            | -38.38                               | -32.69                               |
| Formation of Z-3f         |                            |                                      |                                        |                         |                         |                                      |                                      |
| Compound                  | $E_{\text{electr}}$ [A.U.] | $\epsilon_0 + E_{\text{ZPE}}$ [A.U.] | $\epsilon_0 + E_{\text{therm}}$ [A.U.] | $\epsilon_0 + H$ [A.U.] | $\epsilon_0 + G$ [A.U.] | $\Delta H$ [kcal mol <sup>-1</sup> ] | $\Delta G$ [kcal mol <sup>-1</sup> ] |
| TS1                       | -3259.710657               | -3258.613782                         | -3258.547802                           | -3258.546858            | -3258.710307            | 12.37                                | 28.10                                |
| I1                        | -3259.745009               | -3258.646559                         | -3258.580852                           | -3258.579908            | -3258.743156            | -8.79                                | 7.06                                 |
| TS2                       | -3259.721157               | -3258.624271                         | -3258.558637                           | -3258.557693            | -3258.719743            | 5.43                                 | 22.05                                |
| Z-3f                      | -1426.284266               | -1425.823812                         | -1425.797217                           | -1425.796273            | -1425.879964            | -38.79                               | -31.31                               |
| Formation of <i>E</i> -3f |                            |                                      |                                        |                         |                         |                                      |                                      |
| Compound                  | $E_{\text{electr}}$ [A.U.] | $\epsilon_0 + E_{\text{ZPE}}$ [A.U.] | $\epsilon_0 + E_{\text{therm}}$ [A.U.] | $\epsilon_0 + H$ [A.U.] | $\epsilon_0 + G$ [A.U.] | $\Delta H$ [kcal mol <sup>-1</sup> ] | $\Delta G$ [kcal mol <sup>-1</sup> ] |
| TS1                       | -3259.709289               | -3258.611816                         | -3258.546029                           | -3258.545085            | -3258.707911            | 13.51                                | 29.63                                |
| I1                        | -3259.750650               | -3258.651891                         | -3258.586596                           | -3258.585652            | -3258.745580            | -12.47                               | 5.51                                 |
| TS2                       | -3259.709324               | -3258.613192                         | -3258.547310                           | -3258.546366            | -3258.709311            | 12.69                                | 28.73                                |
| <i>E</i> -3f              | -1426.276102               | -1425.815444                         | -1425.788971                           | -1425.788027            | -1425.870835            | -33.51                               | -25.46                               |
| Formation of 3g           |                            |                                      |                                        |                         |                         |                                      |                                      |
| Compound                  | $E_{\text{electr}}$ [A.U.] | $\epsilon_0 + E_{\text{ZPE}}$ [A.U.] | $\epsilon_0 + E_{\text{therm}}$ [A.U.] | $\epsilon_0 + H$ [A.U.] | $\epsilon_0 + G$ [A.U.] | $\Delta H$ [kcal mol <sup>-1</sup> ] | $\Delta G$ [kcal mol <sup>-1</sup> ] |
| TS1                       | -2949.941184               | -2948.979370                         | -2948.921003                           | -2948.920059            | -2949.066336            | 8.57                                 | 24.21                                |
| I1                        | -2949.976905               | -2949.012292                         | -2948.954440                           | -2948.953496            | -2949.097690            | -12.84                               | 4.14                                 |
| TS2                       | -2949.954136               | -2948.991811                         | -2948.933817                           | -2948.932873            | -2949.078147            | 0.36                                 | 16.65                                |
| 3g                        | -1116.504264               | -1116.179412                         | -1116.160195                           | -1116.159251            | -1116.224752            | -36.04                               | -27.99                               |
| Formation of 3h           |                            |                                      |                                        |                         |                         |                                      |                                      |
| Compound                  | $E_{\text{electr}}$ [A.U.] | $\epsilon_0 + E_{\text{ZPE}}$ [A.U.] | $\epsilon_0 + E_{\text{therm}}$ [A.U.] | $\epsilon_0 + H$ [A.U.] | $\epsilon_0 + G$ [A.U.] | $\Delta H$ [kcal mol <sup>-1</sup> ] | $\Delta G$ [kcal mol <sup>-1</sup> ] |
| TS1                       | -3066.720932               | -3065.693363                         | -3065.633362                           | -3065.632418            | -3065.782222            | 5.14                                 | 20.05                                |
| I1                        | -3065.643079               | -3065.726890                         | -3065.666875                           | -3065.665931            | -3065.815357            | -16.32                               | -1.17                                |
| TS2                       | -3066.734289               | -3065.706151                         | -3065.646546                           | -3065.645602            | -3065.793980            | -3.30                                | 12.52                                |
| 3h                        | -1233.281831               | -1232.891297                         | -1232.870388                           | -1232.869444            | -1232.940059            | -38.09                               | -31.79                               |
| Formation of Z-3i         |                            |                                      |                                        |                         |                         |                                      |                                      |
| Compound                  | $E_{\text{electr}}$ [A.U.] |                                      |                                        | $\epsilon_0 + H$ [A.U.] | $\epsilon_0 + G$ [A.U.] |                                      |                                      |

|                           |                     | $\epsilon_0 + E_{ZPE}$<br>[A.U.] | $\epsilon_0 + E_{therm}$<br>[A.U.] |                         |                         | $\Delta H$<br>[kcal<br>mol <sup>-1</sup> ] | $\Delta G$<br>[kcal<br>mol <sup>-1</sup> ] |
|---------------------------|---------------------|----------------------------------|------------------------------------|-------------------------|-------------------------|--------------------------------------------|--------------------------------------------|
| TS1                       | -3141.741552        | -3140.726565                     | -3140.665373                       | -3140.664429            | -3140.816754            | 8.78                                       | 24.50                                      |
| II                        | -3141.775999        | -3140.759481                     | -3140.698448                       | -3140.697504            | -3140.848972            | -12.40                                     | 3.87                                       |
| TS2                       | -3141.753018        | -3140.738392                     | -3140.677367                       | -3140.676422            | -3140.827716            | 1.10                                       | 17.48                                      |
| Z-3i                      | -1308.303326        | -1307.926242                     | -1307.903806                       | -1307.902862            | -1307.977266            | -35.35                                     | -29.05                                     |
| Formation of <i>E</i> -3i |                     |                                  |                                    |                         |                         |                                            |                                            |
| Compound                  | $E_{electr}$ [A.U.] | $\epsilon_0 + E_{ZPE}$<br>[A.U.] | $\epsilon_0 + E_{therm}$<br>[A.U.] | $\epsilon_0 + H$ [A.U.] | $\epsilon_0 + G$ [A.U.] | $\Delta H$<br>[kcal<br>mol <sup>-1</sup> ] | $\Delta G$<br>[kcal<br>mol <sup>-1</sup> ] |
| TS1                       | -3141.738647        | -3140.726033                     | -3140.663718                       | -3140.662774            | -3140.820871            | 9.84                                       | 21.87                                      |
| II                        | -3141.779931        | -3140.765400                     | -3140.703694                       | -3140.702750            | -3140.858301            | -15.76                                     | -2.10                                      |
| TS2                       | -3141.741103        | -3140.728468                     | -3140.666462                       | -3140.665518            | -3140.823623            | 8.08                                       | 20.11                                      |
| <i>E</i> -3i              | -1308.304831        | -1307.927558                     | -1307.905167                       | -1307.904222            | -1307.978895            | -36.22                                     | -30.09                                     |
| Formation of Z-3j         |                     |                                  |                                    |                         |                         |                                            |                                            |
| Compound                  | $E_{electr}$ [A.U.] | $\epsilon_0 + E_{ZPE}$<br>[A.U.] | $\epsilon_0 + E_{therm}$<br>[A.U.] | $\epsilon_0 + H$ [A.U.] | $\epsilon_0 + G$ [A.U.] | $\Delta H$<br>[kcal<br>mol <sup>-1</sup> ] | $\Delta G$<br>[kcal<br>mol <sup>-1</sup> ] |
| TS1                       | -3027.360404        | -3026.363588                     | -3026.303963                       | -3026.303019            | -3026.451866            | 7.29                                       | 22.85                                      |
| II                        | -3027.387622        | -3026.389660                     | -3026.329937                       | -3026.328993            | -3026.478119            | -9.35                                      | 6.04                                       |
| TS2                       | -3027.367428        | -3026.370859                     | -3026.311326                       | -3026.310381            | -3026.458934            | 2.57                                       | 18.33                                      |
| Z-3j                      | -1193.919416        | -1193.560030                     | -1193.539316                       | -1193.538372            | -1193.607826            | -34.87                                     | -27.78                                     |
| Formation of <i>E</i> -3j |                     |                                  |                                    |                         |                         |                                            |                                            |
| Compound                  | $E_{electr}$ [A.U.] | $\epsilon_0 + E_{ZPE}$<br>[A.U.] | $\epsilon_0 + E_{therm}$<br>[A.U.] | $\epsilon_0 + H$ [A.U.] | $\epsilon_0 + G$ [A.U.] | $\Delta H$<br>[kcal<br>mol <sup>-1</sup> ] | $\Delta G$<br>[kcal<br>mol <sup>-1</sup> ] |
| TS1                       | -3027.359489        | -3026.362673                     | -3026.303048                       | -3026.302104            | -3026.450951            | 7.87                                       | 23.44                                      |
| II                        | -3027.380572        | -3026.383537                     | -3026.324367                       | -3026.323423            | -3026.473032            | -5.78                                      | 9.30                                       |
| TS2                       | -3027.361618        | -3026.366779                     | -3026.307433                       | -3026.306489            | -3026.455933            | 5.07                                       | 20.25                                      |
| <i>E</i> -3j              | -1193.918065        | -1193.558825                     | -1193.538062                       | -1193.537118            | -1193.606958            | -34.06                                     | -27.23                                     |

**Table S5.** Selected computational parameters obtained for considered systems (in atomic units A.U.):  $\epsilon_0$  - electronic energy;  $\epsilon_0 + \dots$  - sum of electronic and:  $E_{zpe}$  - zero-point energies,  $E_{therm}$  - thermal energies,  $H$  - thermal enthalpies,  $G$  - thermal free energies calculated at TPSSTPSS//6-31+G(d,p).

| Reaction of acetone with <i>t</i> Bu <sub>2</sub> P-PSiMe <sub>3</sub> (LiTHF <sub>3</sub> ) |                        |                                  |                                    |                         |                         |                                              |                                              |            |              |
|----------------------------------------------------------------------------------------------|------------------------|----------------------------------|------------------------------------|-------------------------|-------------------------|----------------------------------------------|----------------------------------------------|------------|--------------|
| Compound                                                                                     | $E_{electr}$<br>[A.U.] | $\epsilon_0 + E_{ZPE}$<br>[A.U.] | $\epsilon_0 + E_{therm}$<br>[A.U.] | $\epsilon_0 + H$ [A.U.] | $\epsilon_0 + G$ [A.U.] | $\Delta H_{298K}$<br>[kJ mol <sup>-1</sup> ] | $\Delta G_{298K}$<br>[kJ mol <sup>-1</sup> ] | $K_{298K}$ | $\alpha$ [%] |
| CH <sub>3</sub> COCH <sub>3</sub>                                                            | -193.205228            | -193.122707                      | -193.117135                        | -193.116190             | -193.151963             | 5.60                                         | -4.03                                        | 5.09       | 83.57        |
| <i>t</i> Bu <sub>2</sub> PP(SiMe <sub>3</sub> )H                                             | -1408.490128           | -                                | -                                  | -1408.102189            | -                       |                                              |                                              |            |              |
| CH <sub>2</sub> C(OLiTHF <sub>3</sub> )CH <sub>3</sub>                                       | -897.791336            | -897.366748                      | -897.341144                        | -897.340200             | -897.430294             |                                              |                                              |            |              |
| <i>t</i> Bu <sub>2</sub> PP(SiMe <sub>3</sub> )Li·3THF                                       | -2113.086524           | -                                | -                                  | -2112.334946            | -                       |                                              |                                              |            |              |

## E.2. Philicity of selected atoms in 1, [(BDI\*)Ti(Cl){ $\eta^2$ -P(SiMe<sub>3</sub>)-PtBu<sub>2</sub>}] and ketones

**Table S6.** Values of nucleophilic ( $f_N$ ), electrophilic ( $f_E$ ) Fukui functions and dual descriptors ( $\Delta f$ ) calculated using partial charges derived via Hirshfeld Population Analysis.

| [(BDI*)Ti(Cl){ $\eta^2$ -P-PtBu <sub>2</sub> }] (1)                 |       |            |                     |       |            |         |       |            |
|---------------------------------------------------------------------|-------|------------|---------------------|-------|------------|---------|-------|------------|
| <i>t</i> Bu <sub>2</sub> P                                          |       |            | P                   |       |            | Ti(IV)  |       |            |
| $f_N$                                                               | $f_E$ | $\Delta f$ | $f_N$               | $f_E$ | $\Delta f$ | $f_N$   | $f_E$ | $\Delta f$ |
| 0.048                                                               | 0.045 | -0.003     | 0.241               | 0.158 | -0.083     | 0.067   | 0.148 | 0.081      |
| [(BDI*)Ti(Cl){ $\eta^2$ -P(SiMe <sub>3</sub> )-PtBu <sub>2</sub> }] |       |            |                     |       |            |         |       |            |
| <i>t</i> Bu <sub>2</sub> P                                          |       |            | Me <sub>3</sub> SiP |       |            | Ti(III) |       |            |
| $f_N$                                                               | $f_E$ | $\Delta f$ | $f_N$               | $f_E$ | $\Delta f$ | $f_N$   | $f_E$ | $\Delta f$ |
| 0.030                                                               | 0.024 | -0.006     | 0.069               | 0.036 | -0.033     | 0.137   | 0.203 | 0.066      |

**Table S7.** Values of nucleophilic ( $f_N$ ), electrophilic ( $f_E$ ) Fukui functions and dual descriptors ( $\Delta f$ ) calculated using partial charges derived via Hirshfeld Population Analysis.

| Compound                    | C     |       |            | O     |       |            |
|-----------------------------|-------|-------|------------|-------|-------|------------|
|                             | $f_N$ | $f_E$ | $\Delta f$ | $f_N$ | $f_E$ | $\Delta f$ |
| (Ph) <sub>2</sub> C=O       | 0.057 | 0.127 | 0.070      | 0.266 | 0.141 | -0.125     |
| 9-fluorenone                | 0.077 | 0.113 | 0.036      | 0.311 | 0.142 | -0.169     |
| (Ph)(4-CN-Ph)C=O            | 0.055 | 0.101 | 0.046      | 0.255 | 0.121 | -0.134     |
| (4-CN-Ph) <sub>2</sub> C=O  | 0.053 | 0.106 | 0.053      | 0.245 | 0.124 | -0.120     |
| (4-MeO-Ph) <sub>2</sub> C=O | 0.027 | 0.130 | 0.103      | 0.139 | 0.141 | 0.002      |
| <i>t</i> Bu(Ph)C=O          | 0.078 | 0.121 | 0.043      | 0.295 | 0.136 | -0.159     |
| Me <sub>2</sub> C=O         | 0.121 | 0.213 | 0.092      | 0.386 | 0.228 | -0.159     |
| Cyclohexanone               | 0.109 | 0.109 | -0.001     | 0.341 | 0.134 | -0.207     |
| Me(Ph)C=O                   | 0.086 | 0.123 | 0.037      | 0.342 | 0.147 | -0.194     |
| <i>cyclo</i> -PrMeC=O       | 0.097 | 0.192 | 0.094      | 0.349 | 0.186 | -0.163     |

## E.3. Optimized structures and Cartesian coordinates

### E.3.1. Substrates and by-products

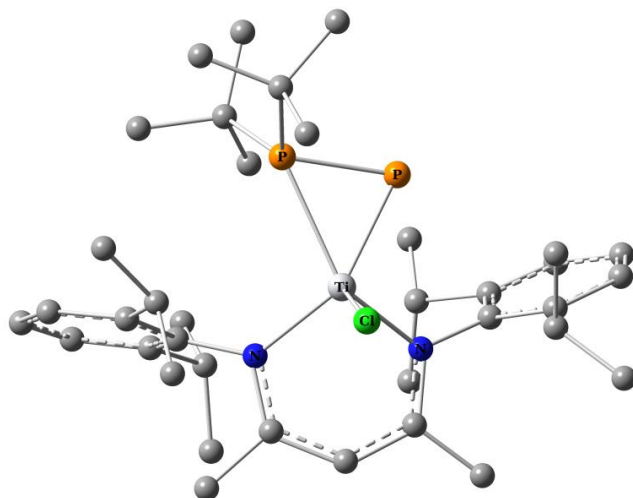

**Figure S155.** Optimized structure of **1**.

Below are presented xyz coordinates for optimized geometry of **1**:

|   |             |             |             |
|---|-------------|-------------|-------------|
| C | -3.12142900 | -0.43821000 | 0.21235000  |
| C | -3.18317000 | -1.08400800 | 1.47197200  |
| C | -4.30821200 | -0.85662700 | 2.27879200  |
| H | -4.37722600 | -1.34288600 | 3.24957700  |
| C | -5.33314700 | 0.00231700  | 1.86335500  |
| H | -6.19604900 | 0.17278100  | 2.50510000  |
| C | -5.23283100 | 0.65688400  | 0.63396500  |
| H | -6.01724400 | 1.34724100  | 0.32732700  |
| C | -4.13090600 | 0.45450700  | -0.21788100 |
| C | -2.04603600 | -1.98798600 | 1.92913000  |
| H | -1.12887400 | -1.56972900 | 1.48867900  |
| C | -2.22643800 | -3.42775600 | 1.39737800  |
| H | -1.42235500 | -4.07676700 | 1.76836600  |
| H | -2.20472000 | -3.45874100 | 0.30167100  |
| H | -3.18491400 | -3.84422700 | 1.73578300  |
| C | -1.86369800 | -1.99921100 | 3.45753400  |
| H | -0.93068800 | -2.51642300 | 3.71520900  |
| H | -2.68389100 | -2.52824400 | 3.96237400  |
| H | -1.81485500 | -0.97802600 | 3.85445600  |
| C | -4.03573400 | 1.24035400  | -1.52133100 |
| H | -3.19252900 | 0.84771600  | -2.10185200 |
| C | -3.73396600 | 2.72864500  | -1.22932700 |
| H | -3.60853200 | 3.27985300  | -2.17024200 |
| H | -2.81417100 | 2.82993400  | -0.64182800 |
| H | -4.55881400 | 3.18336500  | -0.66315100 |
| C | -5.31234100 | 1.11509600  | -2.38199900 |
| H | -5.15744100 | 1.60514300  | -3.35202700 |
| H | -6.16961300 | 1.60118200  | -1.89727300 |
| H | -5.58538500 | 0.06714200  | -2.56388700 |
| C | 2.28606900  | -1.34560700 | -0.69375400 |
| C | 3.31609900  | -0.53661400 | -1.23931900 |
| C | 4.64624600  | -0.91804800 | -0.98830400 |
| H | 5.45857500  | -0.32346700 | -1.39940900 |
| C | 4.94865700  | -2.03800000 | -0.20603800 |
| H | 5.98683200  | -2.31263300 | -0.02700600 |
| C | 3.91653000  | -2.78298800 | 0.37193100  |
| H | 4.15991600  | -3.62952600 | 1.01095400  |
| C | 2.56835700  | -2.45699900 | 0.14175200  |
| C | 3.00411900  | 0.73447100  | -2.02817300 |
| H | 2.13231500  | 1.19471400  | -1.53163200 |
| C | 4.15432000  | 1.75759000  | -1.96480900 |

|    |             |             |             |
|----|-------------|-------------|-------------|
| H  | 3.80434900  | 2.72793400  | -2.33795200 |
| H  | 5.00070400  | 1.45003800  | -2.59473800 |
| H  | 4.52242000  | 1.88997000  | -0.94029800 |
| C  | 2.61587700  | 0.49839000  | -3.50380800 |
| H  | 2.50907500  | 1.46557300  | -4.01105800 |
| H  | 1.65518700  | -0.01578400 | -3.59566200 |
| H  | 3.39280300  | -0.08031400 | -4.02339500 |
| C  | 1.45469400  | -3.28136200 | 0.79332800  |
| H  | 0.56883500  | -2.63494800 | 0.84919400  |
| C  | 1.06383300  | -4.53710700 | -0.02514500 |
| H  | 0.52035300  | -4.28162800 | -0.93990800 |
| H  | 0.40966400  | -5.18186400 | 0.57598300  |
| H  | 1.95750700  | -5.11705000 | -0.29396300 |
| C  | 1.82513000  | -3.72503100 | 2.22579800  |
| H  | 0.93413900  | -4.12007900 | 2.73052500  |
| H  | 2.22135700  | -2.89593700 | 2.82083300  |
| H  | 2.57480700  | -4.52783000 | 2.21283600  |
| C  | -3.40151500 | -2.15363100 | -1.99533600 |
| H  | -3.95124700 | -2.45291200 | -1.09566100 |
| H  | -3.27872200 | -3.01779500 | -2.65486300 |
| H  | -4.01271900 | -1.40213200 | -2.51032700 |
| C  | -2.05501400 | -1.56600800 | -1.62727200 |
| C  | -0.93172500 | -1.99744500 | -2.36892200 |
| H  | -1.15800300 | -2.62499200 | -3.22643400 |
| C  | 0.43834000  | -1.86338100 | -2.06879700 |
| C  | 1.40368000  | -2.67892200 | -2.91558200 |
| H  | 1.91057200  | -3.44238700 | -2.31593300 |
| H  | 2.18897900  | -2.04208800 | -3.33390600 |
| H  | 0.86607000  | -3.17116800 | -3.73137700 |
| C  | 1.46070700  | 3.69069900  | 0.78103700  |
| C  | 1.00696500  | 4.05259100  | -0.64694400 |
| H  | 1.55826800  | 3.48725000  | -1.40770700 |
| H  | 1.18418700  | 5.12558500  | -0.81629500 |
| H  | -0.06100100 | 3.85095900  | -0.78680600 |
| C  | 2.96411100  | 3.99619800  | 0.92468000  |
| H  | 3.56757100  | 3.39753500  | 0.23429200  |
| H  | 3.32833000  | 3.82880300  | 1.94440800  |
| H  | 3.13218200  | 5.05683300  | 0.68406000  |
| C  | 0.64787900  | 4.54242100  | 1.77850600  |
| H  | 0.94556000  | 4.36484100  | 2.81700000  |
| H  | -0.42405800 | 4.32713600  | 1.68602600  |
| H  | 0.80980700  | 5.60795600  | 1.55328200  |
| C  | 2.02514000  | 1.10927700  | 2.51500000  |
| C  | 3.49898400  | 0.83120400  | 2.15082600  |
| H  | 3.57075200  | 0.12633500  | 1.31626900  |
| H  | 4.00505600  | 0.38248500  | 3.01946000  |
| H  | 4.04349000  | 1.74264100  | 1.88295000  |
| C  | 1.92133400  | 2.01959000  | 3.75410400  |
| H  | 0.87310500  | 2.24677000  | 3.98588100  |
| H  | 2.46631500  | 2.96182500  | 3.62811800  |
| H  | 2.35961100  | 1.49732800  | 4.61866600  |
| C  | 1.33520300  | -0.22671800 | 2.83542100  |
| H  | 1.30117000  | -0.87206100 | 1.95025500  |
| H  | 0.30671900  | -0.07011700 | 3.17746100  |
| H  | 1.90096800  | -0.74169700 | 3.62595800  |
| N  | -1.95843100 | -0.68148600 | -0.61513100 |
| N  | 0.91405100  | -1.08634100 | -1.05627400 |
| P  | -1.02153600 | 1.58697800  | 1.28097100  |
| P  | 1.07305300  | 1.81644300  | 1.01259200  |
| Cl | -0.60720200 | 1.66425900  | -2.58709900 |
| Ti | -0.31140100 | 0.52119200  | -0.65254500 |

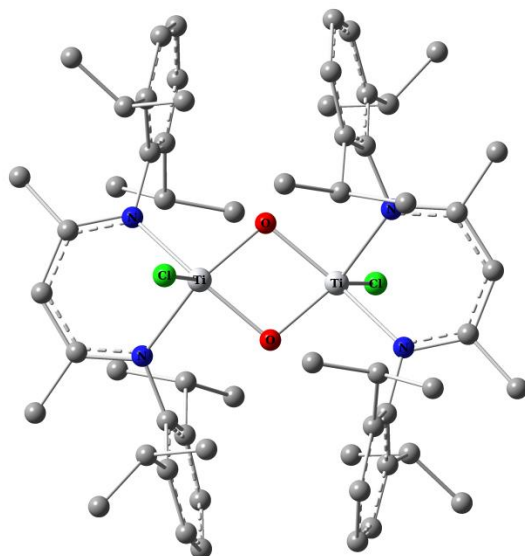

**Figure S156.** Optimized structure of  $[(\text{BDI}^*)\text{Ti}(\text{Cl})(\mu_2\text{-O})]_2$ .

Below are presented xyz coordinates for optimized geometry of  $[(\text{BDI}^*)\text{Ti}(\text{Cl})(\mu_2\text{-O})]_2$ :

|    |             |             |             |
|----|-------------|-------------|-------------|
| Ti | 0.03786200  | -1.13036000 | 0.85773300  |
| Cl | -0.09655100 | -0.78669600 | 3.06756200  |
| O  | -1.27494700 | -0.08854600 | 0.05561800  |
| N  | 1.60592600  | -2.55724800 | 0.88484900  |
| N  | -1.20605200 | -2.81811700 | 0.66290900  |
| C  | 2.75602600  | -4.49116000 | 1.95150200  |
| H  | 3.38779000  | -4.70083600 | 1.08133900  |
| H  | 2.48583100  | -5.43403000 | 2.43569400  |
| H  | 3.36191200  | -3.89697600 | 2.64486200  |
| C  | 1.50748700  | -3.72985400 | 1.54790500  |
| C  | 0.27704500  | -4.32952700 | 1.85162500  |
| H  | 0.31809900  | -5.25946500 | 2.40998900  |
| C  | -0.97501900 | -3.97662600 | 1.32369100  |
| C  | -2.08115300 | -5.00500500 | 1.48791500  |
| H  | -2.88853600 | -4.61438000 | 2.11655000  |
| H  | -1.68202600 | -5.91308400 | 1.94897100  |
| H  | -2.52822400 | -5.25860800 | 0.51967300  |
| C  | -2.51890200 | -2.75202400 | 0.04881800  |
| C  | -3.64410400 | -2.43398200 | 0.84577500  |
| C  | -4.91706300 | -2.54397000 | 0.25981900  |
| H  | -5.79749600 | -2.29722200 | 0.85089800  |
| C  | -5.07227800 | -2.99274300 | -1.05516900 |
| H  | -6.06841900 | -3.09833700 | -1.48267300 |
| C  | -3.94414600 | -3.27985800 | -1.83052900 |
| H  | -4.07189700 | -3.59520000 | -2.86395100 |
| C  | -2.64847100 | -3.13875000 | -1.30574800 |
| C  | -3.50072600 | -2.00227200 | 2.30161100  |
| H  | -2.49305400 | -2.27327300 | 2.63866900  |
| C  | -3.63352500 | -0.47196500 | 2.41543700  |
| H  | -2.93756000 | 0.03339100  | 1.74014200  |
| H  | -3.42852000 | -0.14581900 | 3.44336000  |
| H  | -4.64980700 | -0.16164500 | 2.14700600  |
| C  | -4.51751300 | -2.68750500 | 3.24017500  |
| H  | -5.54231300 | -2.34950000 | 3.03493000  |
| H  | -4.28784400 | -2.42939400 | 4.28213500  |
| H  | -4.50245100 | -3.78180100 | 3.14688000  |
| C  | -1.42075700 | -3.44090400 | -2.16058200 |
| H  | -0.58952700 | -2.84675900 | -1.75512000 |
| C  | -1.02713000 | -4.93315100 | -2.06084800 |
| H  | -0.74252300 | -5.20984000 | -1.03900000 |
| H  | -0.17495600 | -5.14880800 | -2.71844500 |
| H  | -1.86758400 | -5.56945200 | -2.37022500 |
| C  | -1.60799700 | -3.03787300 | -3.63582100 |



|    |             |             |             |
|----|-------------|-------------|-------------|
| H  | -0.66601100 | -3.17397600 | -4.17948900 |
| H  | -1.90246600 | -1.98751100 | -3.72429800 |
| H  | -2.36612000 | -3.65917800 | -4.13163900 |
| C  | 2.93534600  | -2.25362800 | 0.39609400  |
| C  | 3.84787500  | -1.56449300 | 1.22928300  |
| C  | 5.13045000  | -1.29610100 | 0.72422700  |
| H  | 5.83762300  | -0.73985800 | 1.33742700  |
| C  | 5.52307500  | -1.75798600 | -0.53625100 |
| H  | 6.52685700  | -1.55177700 | -0.90523000 |
| C  | 4.62814900  | -2.49962200 | -1.31333700 |
| H  | 4.94423500  | -2.88004000 | -2.28425100 |
| C  | 3.31825800  | -2.75177700 | -0.87163200 |
| C  | 3.48716600  | -1.18871800 | 2.66117500  |
| H  | 2.55843700  | -1.71175000 | 2.91844900  |
| C  | 4.57533900  | -1.62172900 | 3.66921000  |
| H  | 4.83897300  | -2.68252700 | 3.56426700  |
| H  | 4.21923500  | -1.45422500 | 4.69425200  |
| H  | 5.49541300  | -1.03646400 | 3.53753400  |
| C  | 3.21462300  | 0.31661200  | 2.80430200  |
| H  | 4.13052000  | 0.89191900  | 2.62456500  |
| H  | 2.85359200  | 0.53147000  | 3.81839200  |
| H  | 2.46288700  | 0.64696400  | 2.08204100  |
| C  | 2.38118300  | -3.60907500 | -1.71887800 |
| H  | 1.43085700  | -3.70048700 | -1.17967600 |
| C  | 2.08437400  | -2.96774700 | -3.08927800 |
| H  | 1.52783200  | -2.03128800 | -2.97877100 |
| H  | 1.48884400  | -3.65466200 | -3.70439400 |
| H  | 3.01315600  | -2.75075400 | -3.63290400 |
| C  | 2.95473400  | -5.03223400 | -1.90888000 |
| H  | 3.89835200  | -5.00582700 | -2.47051000 |
| H  | 2.24517600  | -5.65573100 | -2.46887700 |
| H  | 3.14988700  | -5.52042700 | -0.94615700 |
| Ti | -0.14719100 | 1.10286800  | -0.79356800 |
| Cl | -0.19696000 | 0.56784100  | -2.97041400 |
| O  | 1.16297600  | 0.09342900  | 0.04265800  |
| N  | -1.63329100 | 2.60541100  | -0.69695900 |
| N  | 1.20216400  | 2.74927500  | -0.85068900 |
| C  | -2.77918700 | 4.63665300  | -1.57637900 |
| H  | -3.17430700 | 4.94154600  | -0.59955200 |
| H  | -2.52141100 | 5.53024000  | -2.15190400 |
| H  | -3.58627300 | 4.10188100  | -2.08699000 |
| C  | -1.55373400 | 3.75860900  | -1.39872200 |
| C  | -0.35667700 | 4.25161400  | -1.93780700 |
| H  | -0.43588900 | 5.15448500  | -2.53515300 |
| C  | 0.94198000  | 3.85685300  | -1.58021000 |
| C  | 2.06152100  | 4.79837300  | -1.98856900 |
| H  | 2.74247500  | 4.30996100  | -2.69338900 |
| H  | 1.64659100  | 5.69257900  | -2.46263400 |
| H  | 2.66050200  | 5.09588000  | -1.12032800 |
| C  | 2.56796300  | 2.66734200  | -0.36823600 |
| C  | 3.58756800  | 2.20410200  | -1.23278500 |
| C  | 4.91106500  | 2.20776800  | -0.75983200 |
| H  | 5.70575100  | 1.83410300  | -1.40330800 |
| C  | 5.22397900  | 2.70796500  | 0.50584100  |
| H  | 6.25753400  | 2.72253100  | 0.84913000  |
| C  | 4.20429600  | 3.19024700  | 1.33364200  |
| H  | 4.45662900  | 3.57335800  | 2.31974800  |
| C  | 2.85950300  | 3.16287600  | 0.92701900  |
| C  | 3.28757800  | 1.73304000  | -2.65172500 |
| H  | 2.27105400  | 2.05275200  | -2.90948500 |
| C  | 3.31746100  | 0.19857700  | -2.72768700 |
| H  | 2.66697200  | -0.24138600 | -1.96696200 |
| H  | 2.98660100  | -0.13899200 | -3.71771800 |
| H  | 4.33440600  | -0.17052000 | -2.55200600 |
| C  | 4.25767500  | 2.32444600  | -3.69870300 |
| H  | 5.27204200  | 1.92279100  | -3.57288800 |
| H  | 3.91912600  | 2.05601200  | -4.70801100 |
| H  | 4.32478900  | 3.41890400  | -3.63806600 |

|   |             |             |             |
|---|-------------|-------------|-------------|
| C | 1.75240600  | 3.68073600  | 1.84529600  |
| H | 0.89206600  | 3.00806500  | 1.71554300  |
| C | 1.29942000  | 5.11071600  | 1.46277000  |
| H | 0.82376500  | 5.14746700  | 0.47809200  |
| H | 0.57235400  | 5.48092400  | 2.19714000  |
| H | 2.15972800  | 5.79397100  | 1.46269600  |
| C | 2.13965300  | 3.67485600  | 3.33632600  |
| H | 1.26153600  | 3.92785400  | 3.94312400  |
| H | 2.51008600  | 2.69797900  | 3.66104900  |
| H | 2.91010200  | 4.42855600  | 3.55081200  |
| C | -2.92855500 | 2.38239500  | -0.08111500 |
| C | -3.97556800 | 1.82524400  | -0.85449400 |
| C | -5.24005600 | 1.69096200  | -0.25640400 |
| H | -6.05424900 | 1.25106300  | -0.83046200 |
| C | -5.47640400 | 2.13365700  | 1.04888100  |
| H | -6.46662100 | 2.03106400  | 1.49057900  |
| C | -4.43621000 | 2.70895900  | 1.78372600  |
| H | -4.62255900 | 3.05673400  | 2.79909900  |
| C | -3.14854800 | 2.84339500  | 1.23649600  |
| C | -3.77180100 | 1.41837500  | -2.30924300 |
| H | -2.81125900 | 1.82568800  | -2.64747200 |
| C | -4.87838600 | 1.96308100  | -3.23987100 |
| H | -5.01221300 | 3.04842400  | -3.13980600 |
| H | -4.62178600 | 1.74444400  | -4.28471300 |
| H | -5.84587500 | 1.48759100  | -3.02984400 |
| C | -3.69823900 | -0.11161100 | -2.42741500 |
| H | -4.64324300 | -0.56208700 | -2.10349500 |
| H | -3.51406800 | -0.40562700 | -3.46887000 |
| H | -2.90048500 | -0.51631800 | -1.79856800 |
| C | -2.04601500 | 3.50866500  | 2.05091600  |
| H | -1.17322100 | 3.62188200  | 1.39691800  |
| C | -1.63723800 | 2.62164800  | 3.24421300  |
| H | -1.27294200 | 1.64722200  | 2.90471500  |
| H | -0.84291400 | 3.10350400  | 3.82864400  |
| H | -2.49257500 | 2.44772500  | 3.91104500  |
| C | -2.46037400 | 4.91736600  | 2.52853600  |
| H | -3.32260700 | 4.87061200  | 3.20684600  |
| H | -1.63353300 | 5.39125300  | 3.07364500  |
| H | -2.72931300 | 5.56462700  | 1.68380500  |

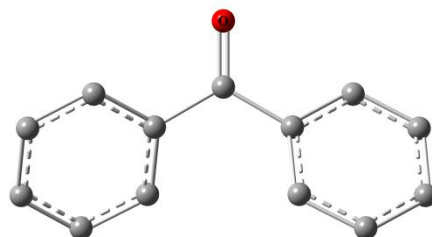

**Figure S157.** Optimized structure of **(Ph)<sub>2</sub>C=O**.

Below are presented xyz coordinates for optimized geometry of **(Ph)<sub>2</sub>C=O**:

|   |            |             |             |
|---|------------|-------------|-------------|
| C | 0.00000000 | 1.10715600  | 0.00000000  |
| O | 0.00000000 | 2.34656600  | 0.00000000  |
| C | 1.29659500 | 0.35624100  | 0.02798300  |
| C | 1.42569400 | -0.90362700 | 0.64710900  |
| C | 2.43651300 | 0.97562300  | -0.52315300 |
| C | 2.67477700 | -1.53495800 | 0.70574300  |
| H | 0.55813600 | -1.37236900 | 1.10694900  |
| C | 3.67683500 | 0.33319000  | -0.48434200 |
| H | 2.32368900 | 1.95831000  | -0.97583300 |
| C | 3.79837700 | -0.92366800 | 0.13122500  |
| H | 2.77117400 | -2.49983300 | 1.20018000  |
| H | 4.54983900 | 0.80976800  | -0.92648200 |

|   |             |             |             |
|---|-------------|-------------|-------------|
| H | 4.76632600  | -1.42041200 | 0.16829700  |
| C | -1.29659500 | 0.35624100  | -0.02798300 |
| C | -1.42569400 | -0.90362700 | -0.64710900 |
| C | -2.43651300 | 0.97562300  | 0.52315300  |
| C | -2.67477600 | -1.53495800 | -0.70574400 |
| H | -0.55813600 | -1.37236900 | -1.10694900 |
| C | -3.67683500 | 0.33319000  | 0.48434200  |
| H | -2.32368900 | 1.95831000  | 0.97583400  |
| C | -3.79837700 | -0.92366800 | -0.13122600 |
| H | -2.77117400 | -2.49983300 | -1.20018100 |
| H | -4.54984000 | 0.80976700  | 0.92648200  |
| H | -4.76632600 | -1.42041200 | -0.16829800 |

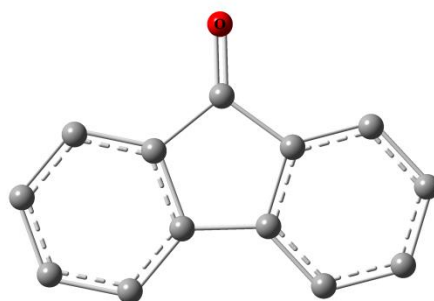

**Figure S158.** Optimized structure of **9-fluorenone**.

Below are presented xyz coordinates for optimized geometry of **9-fluorenone**.

|   |             |             |             |
|---|-------------|-------------|-------------|
| C | -3.03859900 | -1.40130600 | 0.00014300  |
| C | -3.47892000 | -0.06759300 | 0.00014400  |
| C | -2.54877700 | 0.98809300  | 0.00009200  |
| C | -1.19208700 | 0.67063400  | 0.00004000  |
| C | -0.74200500 | -0.67233700 | 0.00003900  |
| C | -1.66579600 | -1.71893900 | 0.00009100  |
| H | -3.77170900 | -2.20607400 | 0.00018400  |
| H | -4.54568100 | 0.14700900  | 0.00018500  |
| H | -2.86859300 | 2.02832000  | 0.00009200  |
| H | -1.34426100 | -2.75895100 | 0.00009100  |
| C | 0.00000000  | 1.58195900  | -0.00002000 |
| C | 1.19208700  | 0.67063400  | -0.00005800 |
| C | 2.54877700  | 0.98809300  | -0.00011800 |
| C | 3.47892000  | -0.06759300 | -0.00014200 |
| C | 3.03859900  | -1.40130600 | -0.00010700 |
| C | 1.66579600  | -1.71893900 | -0.00004600 |
| C | 0.74200500  | -0.67233700 | -0.00002200 |
| H | 2.86859300  | 2.02832000  | -0.00014500 |
| H | 4.54568100  | 0.14700900  | -0.00018900 |
| H | 3.77170900  | -2.20607400 | -0.00012600 |
| H | 1.34426100  | -2.75895100 | -0.00001900 |
| O | 0.00000000  | 2.81312500  | -0.00003700 |

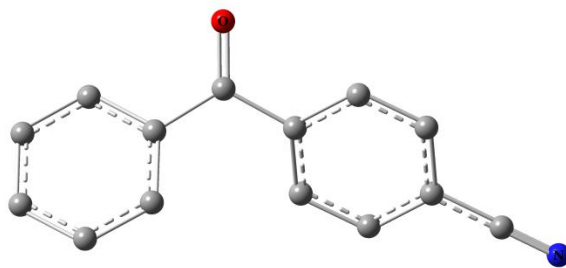

**Figure S159.** Optimized structure of **(4-CN-Ph)PhC=O**.

Below are presented xyz coordinates for optimized geometry of **(4-CN-Ph)PhC=O**:

|   |             |             |             |
|---|-------------|-------------|-------------|
| C | -0.81686400 | 1.21435200  | -0.02051500 |
| O | -0.97366300 | 2.44190700  | -0.06268800 |
| C | 0.57612500  | 0.64968500  | -0.01366500 |
| C | 0.89476000  | -0.57738100 | -0.62908200 |
| C | 1.60336600  | 1.42514800  | 0.56031900  |
| C | 2.21554200  | -1.03012700 | -0.66342100 |
| H | 0.11336100  | -1.16484000 | -1.10552300 |
| C | 2.92128500  | 0.97280500  | 0.55402700  |
| H | 1.34461400  | 2.38238300  | 1.00655500  |
| C | 3.23378600  | -0.26159500 | -0.06026400 |
| H | 2.46758800  | -1.96844400 | -1.15069100 |
| H | 3.71346300  | 1.56001800  | 1.01121000  |
| C | -1.99388300 | 0.29385200  | 0.01786800  |
| C | -3.21061900 | 0.74673200  | -0.53228300 |
| C | -1.94279900 | -0.96991700 | 0.64162200  |
| C | -4.34809200 | -0.06295300 | -0.48675900 |
| H | -3.23720500 | 1.73294700  | -0.99030500 |
| C | -3.09081300 | -1.76927900 | 0.70605500  |
| H | -1.01850200 | -1.31176200 | 1.10289900  |
| C | -4.29013800 | -1.32235000 | 0.13312100  |
| H | -5.28042100 | 0.28473200  | -0.92743500 |
| H | -3.05020500 | -2.73625300 | 1.20362100  |
| C | 4.58827200  | -0.73198100 | -0.07602400 |
| N | 5.69654500  | -1.11806700 | -0.08706000 |
| H | -5.17877700 | -1.94950300 | 0.17460000  |

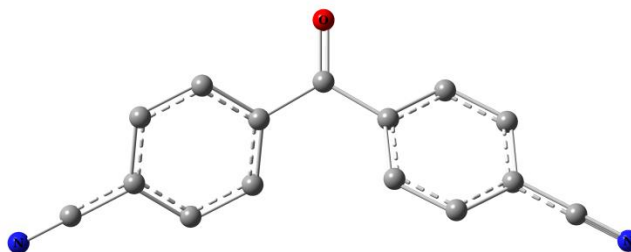

**Figure S160.** Optimized structure of **(4-CN-Ph)<sub>2</sub>C=O**.

Below are presented xyz coordinates for optimized geometry of **(4-CN-Ph)<sub>2</sub>C=O**.

|   |            |             |             |
|---|------------|-------------|-------------|
| C | 0.00000000 | 1.48264500  | 0.00000000  |
| O | 0.00000000 | 2.71966300  | 0.00000000  |
| C | 1.29820600 | 0.73235900  | 0.00206700  |
| C | 2.42431300 | 1.35577400  | -0.57279500 |
| C | 1.44070600 | -0.52549000 | 0.62223600  |
| C | 3.66588500 | 0.72392500  | -0.56123000 |
| H | 2.30219500 | 2.33724500  | -1.02451400 |
| C | 2.68526800 | -1.15761500 | 0.66087400  |
| H | 0.58604100 | -0.99707600 | 1.10182700  |
| C | 3.80152000 | -0.53992100 | 0.05775400  |
| H | 4.53310800 | 1.19320100  | -1.01824900 |
| H | 2.80324300 | -2.11999100 | 1.15183700  |

|   |             |             |             |
|---|-------------|-------------|-------------|
| C | -1.29820600 | 0.73235900  | -0.00206700 |
| C | -1.44070500 | -0.52549000 | -0.62223600 |
| C | -2.42431300 | 1.35577400  | 0.57279500  |
| C | -2.68526800 | -1.15761500 | -0.66087400 |
| H | -0.58604100 | -0.99707600 | -1.10182600 |
| C | -3.66588500 | 0.72392500  | 0.56123000  |
| H | -2.30219500 | 2.33724500  | 1.02451400  |
| C | -3.80152000 | -0.53992100 | -0.05775400 |
| H | -2.80324300 | -2.11999100 | -1.15183600 |
| H | -4.53310800 | 1.19320100  | 1.01824800  |
| C | 5.07742700  | -1.19402900 | 0.07857800  |
| N | 6.12123300  | -1.72999800 | 0.09387400  |
| C | -5.07742700 | -1.19402900 | -0.07857800 |
| N | -6.12123200 | -1.72999900 | -0.09387400 |

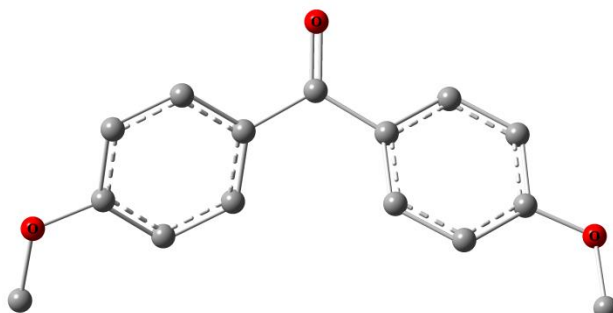

**Figure S161.** Optimized structure of **(4-MeO-Ph)<sub>2</sub>C=O**.

Below are presented xyz coordinates for optimized geometry of **(4-MeO-Ph)<sub>2</sub>C=O**:

|   |             |             |             |
|---|-------------|-------------|-------------|
| C | -0.00000100 | 1.65786000  | 0.00000300  |
| C | 1.29189700  | 0.91119900  | -0.04836600 |
| C | 2.41276100  | 1.54330300  | -0.63438100 |
| H | 2.28055700  | 2.53457400  | -1.06219900 |
| C | 3.65247600  | 0.91680100  | -0.66622800 |
| H | 4.51601600  | 1.38756600  | -1.13020400 |
| C | 3.81041700  | -0.35681100 | -0.07944200 |
| C | 2.71601100  | -0.99103000 | 0.53596900  |
| H | 2.82471500  | -1.95957500 | 1.01585000  |
| C | 1.46699500  | -0.35582600 | 0.53791600  |
| H | 0.63041500  | -0.84195700 | 1.03558100  |
| C | 5.28486400  | -2.18118100 | 0.43270800  |
| H | 5.08534900  | -2.15824700 | 1.51301600  |
| H | 6.33814900  | -2.40712700 | 0.25413500  |
| H | 4.65243600  | -2.94015900 | -0.04851900 |
| C | -1.29189700 | 0.91119700  | 0.04837400  |
| C | -1.46699000 | -0.35583500 | -0.53789600 |
| H | -0.63040400 | -0.84197300 | -1.03554500 |
| C | -2.71600600 | -0.99103800 | -0.53595400 |
| H | -2.82470500 | -1.95958800 | -1.01582600 |
| C | -3.81041800 | -0.35681200 | 0.07943900  |
| C | -3.65248000 | 0.91680400  | 0.66621700  |
| H | -4.51602300 | 1.38757300  | 1.13018200  |
| C | -2.41276500 | 1.54330600  | 0.63437500  |
| H | -2.28056600 | 2.53458100  | 1.06218600  |
| C | -5.28486300 | -2.18118300 | -0.43271700 |
| H | -5.08533200 | -2.15825200 | -1.51302100 |
| H | -6.33815200 | -2.40712300 | -0.25415700 |
| H | -4.65244600 | -2.94016200 | 0.04852200  |
| O | 5.07053800  | -0.88896700 | -0.15506400 |
| O | -5.07053900 | -0.88896600 | 0.15505500  |
| O | -0.00000100 | 2.90110100  | -0.00000300 |

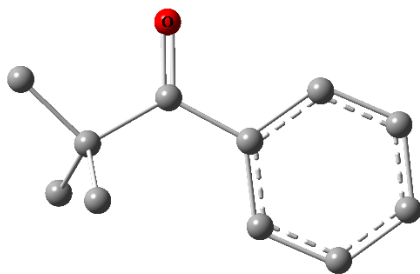

**Figure S162.** Optimized structure of ***t*Bu(Ph)C=O**.

Below are presented xyz coordinates for optimized geometry of ***t*Bu(Ph)C=O**:

|   |             |             |             |
|---|-------------|-------------|-------------|
| C | -0.72455300 | 0.73163300  | -0.09963600 |
| O | -0.93529800 | 1.94051000  | -0.24709900 |
| C | 0.70972800  | 0.26100000  | -0.05103600 |
| C | 1.13324500  | -1.08215700 | -0.13086700 |
| C | 1.69330000  | 1.26746100  | 0.07078500  |
| C | 2.49552400  | -1.40611500 | -0.09306200 |
| H | 0.41305700  | -1.88649100 | -0.23637100 |
| C | 3.05116800  | 0.94459600  | 0.12073500  |
| H | 1.35850900  | 2.30064400  | 0.12453600  |
| C | 3.45828300  | -0.39632600 | 0.03724300  |
| H | 3.79267000  | 1.73493300  | 0.22298300  |
| H | 2.80241300  | -2.44794900 | -0.16510500 |
| C | -1.92934300 | -0.23163300 | 0.04692900  |
| H | 4.51599400  | -0.65137200 | 0.07243400  |
| C | -2.05554900 | -1.12499900 | -1.21717100 |
| H | -1.20335700 | -1.79695000 | -1.36041900 |
| H | -2.96049000 | -1.74114400 | -1.12862500 |
| H | -2.15334100 | -0.50411500 | -2.11657500 |
| C | -1.80304000 | -1.09345300 | 1.32934600  |
| H | -2.71237200 | -1.69844800 | 1.44496800  |
| H | -0.94473200 | -1.77192000 | 1.31155300  |
| H | -1.70857400 | -0.45287900 | 2.21568400  |
| C | -3.21389300 | 0.61676400  | 0.15818900  |
| H | -4.07945300 | -0.05166300 | 0.25927200  |
| H | -3.17570000 | 1.27765500  | 1.03183700  |
| H | -3.35146900 | 1.24499200  | -0.72810400 |

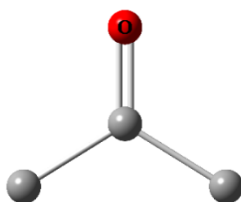

**Figure S163.** Optimized structure of **Me<sub>2</sub>C=O**.

Below are presented xyz coordinates for optimized geometry of **Me<sub>2</sub>C=O**:

|   |             |             |             |
|---|-------------|-------------|-------------|
| C | 0.00000000  | 0.18160500  | 0.00000000  |
| O | 0.00000000  | 1.40979000  | -0.00000100 |
| C | 1.29645500  | -0.61714500 | -0.00000100 |
| H | 1.33828900  | -1.27081900 | 0.88261400  |
| H | 1.33828800  | -1.27081800 | -0.88261800 |
| H | 2.15400000  | 0.06052800  | -0.00000100 |
| C | -1.29645500 | -0.61714500 | 0.00000200  |
| H | -1.33828900 | -1.27082000 | -0.88261300 |
| H | -1.33828800 | -1.27081700 | 0.88261900  |
| H | -2.15400000 | 0.06052800  | 0.00000100  |

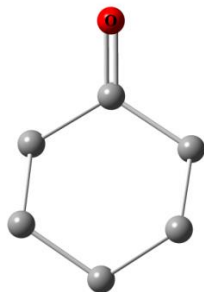

**Figure S164.** Optimized structure of  $(\text{CH}_2)_5\text{C}=\text{O}$ .

Below are presented xyz coordinates for optimized geometry of  $(\text{CH}_2)_5\text{C}=\text{O}$ :

|   |             |             |             |
|---|-------------|-------------|-------------|
| O | 1.32607100  | 1.91126900  | 0.00000000  |
| C | 0.42288000  | 1.07707200  | 0.00000000  |
| C | -0.16922300 | 0.51375000  | 1.28679400  |
| C | -0.16922300 | 0.51375000  | -1.28679400 |
| C | -0.16922300 | -1.03570200 | 1.26819200  |
| H | -1.21197700 | 0.86514300  | 1.35846300  |
| H | 0.38791500  | 0.91623300  | 2.13963000  |
| C | -0.16922300 | -1.03570200 | -1.26819200 |
| H | -1.21197700 | 0.86514300  | -1.35846300 |
| H | 0.38791500  | 0.91623300  | -2.13963000 |
| C | -0.85049300 | -1.57945800 | 0.00000000  |
| H | -0.66970600 | -1.41222000 | 2.17046300  |
| H | 0.87076200  | -1.39371400 | 1.30568800  |
| H | -0.66970600 | -1.41222000 | -2.17046300 |
| H | 0.87076200  | -1.39371400 | -1.30568800 |
| H | -0.82300500 | -2.67785200 | 0.00000000  |
| H | -1.91252100 | -1.28544000 | 0.00000000  |

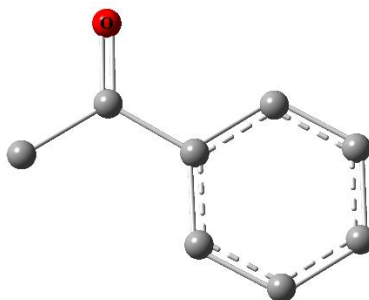

**Figure S165.** Optimized structure of  $\text{Me}(\text{Ph})\text{C}=\text{O}$ .

Below are presented xyz coordinates for optimized geometry of  $\text{Me}(\text{Ph})\text{C}=\text{O}$ .

|   |             |             |             |
|---|-------------|-------------|-------------|
| C | -1.70055800 | -0.20033000 | 0.00000200  |
| O | -2.22492300 | -1.31807000 | 0.00000000  |
| C | -0.20772800 | -0.05735100 | 0.00000100  |
| C | 0.43019900  | 1.19954800  | 0.00000000  |
| C | 0.57785900  | -1.22826700 | 0.00000000  |
| C | 1.82823400  | 1.28339500  | -0.00000100 |
| H | -0.15923700 | 2.11396900  | 0.00000100  |
| C | 1.97220000  | -1.14382200 | -0.00000100 |
| H | 0.06678000  | -2.18849200 | 0.00000000  |
| C | 2.60043300  | 0.11281000  | -0.00000100 |
| H | 2.57214900  | -2.05201400 | -0.00000100 |
| H | 2.31353100  | 2.25759800  | -0.00000100 |
| C | -2.56101600 | 1.05584100  | 0.00000000  |
| H | -2.35289900 | 1.67181800  | 0.88552200  |
| H | -2.35289800 | 1.67181700  | -0.88552100 |
| H | -3.61281900 | 0.76025400  | 0.00000000  |

H 3.68704300 0.17866000 -0.00000200

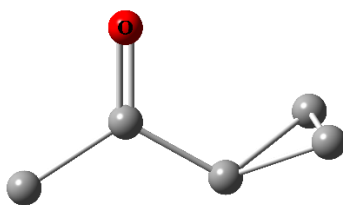

**Figure S166.** Optimized structure of *cyclo-PrMeC=O*.

Below are presented xyz coordinates for optimized geometry of *cyclo-PrMeC=O*:

|   |             |             |             |
|---|-------------|-------------|-------------|
| O | 0.78662900  | 1.38691400  | 0.00000300  |
| C | 0.79486600  | 0.15303400  | -0.00000100 |
| C | 2.09270400  | -0.63822100 | -0.00000200 |
| H | 2.13496400  | -1.29111900 | -0.88343500 |
| H | 2.94764500  | 0.04274500  | 0.00000200  |
| H | 2.13496200  | -1.29112400 | 0.88342800  |
| C | -0.47381600 | -0.63565700 | -0.00000200 |
| C | -1.66981200 | -0.03792200 | 0.74636500  |
| C | -1.66981400 | -0.03791900 | -0.74636300 |
| H | -0.37692500 | -1.71996400 | -0.00000400 |
| H | -1.47534700 | 0.90885700  | 1.24546500  |
| H | -2.31387400 | -0.73673400 | 1.27504900  |
| H | -2.31387700 | -0.73672800 | -1.27505000 |
| H | -1.47534900 | 0.90886300  | -1.24546000 |

### E.3.2. Reaction of **1** with benzophenone leading to **3a**

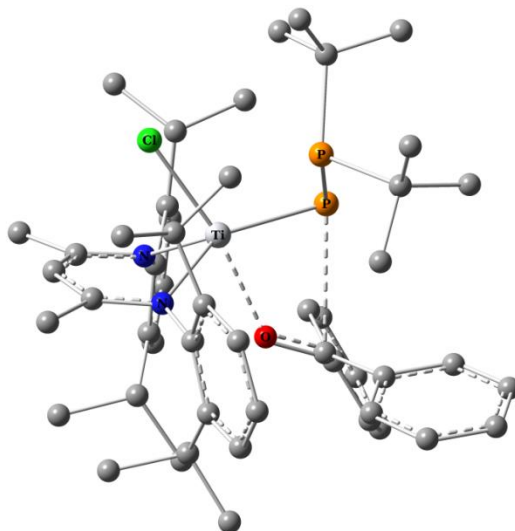

**Figure S167.** Optimized structure of **3aTs1**.

Below are presented xyz coordinates for optimized geometry of **3aTs1**:

|   |            |             |             |
|---|------------|-------------|-------------|
| C | 2.96003400 | 0.66014800  | -1.05213900 |
| C | 3.58137600 | 1.84825500  | -0.59348900 |
| C | 4.93676800 | 1.77980200  | -0.21604800 |
| H | 5.43674400 | 2.69042800  | 0.11138400  |
| C | 5.65597700 | 0.58285900  | -0.26297600 |
| H | 6.70338400 | 0.55923600  | 0.03444200  |
| C | 5.01157100 | -0.58764200 | -0.67136400 |
| H | 5.55820500 | -1.52962200 | -0.68051800 |
| C | 3.66572200 | -0.57195300 | -1.07110400 |
| C | 2.88068900 | 3.20080800  | -0.52945200 |
| H | 1.82163800 | 3.05305700  | -0.77865800 |



|   |             |             |             |
|---|-------------|-------------|-------------|
| C | 2.97570000  | 3.78253700  | 0.89841800  |
| H | 2.41360500  | 4.72052400  | 0.95934800  |
| H | 2.56166700  | 3.08341100  | 1.63450700  |
| H | 4.01886700  | 4.00028800  | 1.16656100  |
| C | 3.48410900  | 4.21435000  | -1.53173900 |
| H | 3.12204600  | 5.22533900  | -1.30402900 |
| H | 4.58061800  | 4.22401900  | -1.46471000 |
| H | 3.21575900  | 3.98140600  | -2.56781000 |
| C | 3.00110300  | -1.85990700 | -1.53929300 |
| H | 1.91903000  | -1.70292700 | -1.48208400 |
| C | 3.36105200  | -3.08201400 | -0.64017500 |
| H | 2.45063200  | -3.52733800 | -0.22417500 |
| H | 3.87470000  | -3.86444600 | -1.21484200 |
| H | 4.00270000  | -2.80481200 | 0.20259100  |
| C | 3.37280900  | -2.15460500 | -3.01456200 |
| H | 2.92928300  | -1.42453200 | -3.70102500 |
| H | 4.46397300  | -2.13348800 | -3.14363400 |
| H | 3.01517400  | -3.15105000 | -3.30331900 |
| C | -2.15198900 | -1.49345200 | -1.66225300 |
| C | -1.91098500 | -2.86353700 | -1.37435400 |
| C | -3.01534300 | -3.67361600 | -1.05244700 |
| H | -2.85712300 | -4.72571200 | -0.82569100 |
| C | -4.31442400 | -3.15385800 | -1.00647900 |
| H | -5.15004900 | -3.79586200 | -0.73162800 |
| C | -4.53688500 | -1.82099500 | -1.35722500 |
| H | -5.55378800 | -1.42947200 | -1.37847000 |
| C | -3.47425100 | -0.97731200 | -1.72628800 |
| C | -0.49711500 | -3.44436200 | -1.47197300 |
| H | 0.17998900  | -2.67928200 | -1.07378700 |
| C | -0.28119400 | -4.75867100 | -0.66849100 |
| H | 0.67748900  | -4.71408700 | -0.13793500 |
| H | -1.05711100 | -4.94656900 | 0.08017800  |
| H | -0.24007000 | -5.63066300 | -1.33441400 |
| C | -0.11183500 | -3.69171100 | -2.95705500 |
| H | 0.72936700  | -4.39465700 | -3.01438900 |
| H | -0.95463800 | -4.12545400 | -3.51127800 |
| H | 0.19436900  | -2.76705000 | -3.45636400 |
| C | -3.79756100 | 0.39166600  | -2.32476900 |
| H | -2.85982800 | 0.86125200  | -2.63692200 |
| C | -4.45013000 | 1.35454300  | -1.31817300 |
| H | -4.79174600 | 2.26245500  | -1.83242500 |
| H | -5.31700300 | 0.88940600  | -0.82799900 |
| H | -3.71988600 | 1.65182900  | -0.55718000 |
| C | -4.72065200 | 0.23047700  | -3.57142000 |
| H | -4.44172200 | 0.95444600  | -4.34829400 |
| H | -4.66484900 | -0.77636900 | -4.00250900 |
| H | -5.77010900 | 0.41899500  | -3.30648700 |
| C | 2.68162600  | 1.29278100  | -3.76560300 |
| H | 2.62608300  | 0.96393300  | -4.80783900 |
| H | 2.57896100  | 2.38614700  | -3.74601700 |
| H | 3.66590000  | 1.04503500  | -3.35884000 |
| C | 1.54496900  | 0.70181000  | -2.95273000 |
| C | 0.43918700  | 0.24737000  | -3.67904000 |
| H | 0.50815600  | 0.37446300  | -4.75680300 |
| C | -0.71264200 | -0.44712700 | -3.23983800 |
| C | -1.58437200 | -0.98950300 | -4.36201800 |
| H | -0.96334100 | -1.30768400 | -5.20608700 |
| H | -2.20969200 | -1.82485800 | -4.03971300 |
| H | -2.24400300 | -0.18632100 | -4.71605200 |
| C | 0.76504500  | -1.40924000 | 1.65092100  |
| C | -1.84116100 | 4.00767700  | 1.35718300  |
| C | -1.91729500 | 4.41860300  | 2.84210800  |
| H | -2.86375500 | 4.13606600  | 3.31568500  |
| H | -1.09181600 | 3.97232200  | 3.41060200  |
| H | -1.82663200 | 5.51436500  | 2.90924500  |
| C | -0.55064000 | 4.63849100  | 0.78179700  |
| H | -0.11708900 | 4.04956200  | -0.03005600 |
| H | -0.78657700 | 5.63971100  | 0.39238900  |

|    |             |             |             |
|----|-------------|-------------|-------------|
| H  | 0.19839900  | 4.74669700  | 1.57330200  |
| C  | -3.03791500 | 1.28860400  | 2.37721300  |
| C  | -3.07110600 | -0.17129900 | 1.89449500  |
| H  | -2.05783400 | -0.57168300 | 1.83199100  |
| H  | -3.64078200 | -0.79458300 | 2.59872800  |
| H  | -3.52966800 | -0.25895800 | 0.90270900  |
| C  | -4.46435900 | 1.86271400  | 2.26272800  |
| H  | -4.51309300 | 2.92841000  | 2.51090500  |
| H  | -4.89222600 | 1.71257600  | 1.26697200  |
| H  | -5.10254100 | 1.32919100  | 2.98455700  |
| Cl | -0.80492400 | 2.56811200  | -1.96266400 |
| N  | 1.61816800  | 0.64914900  | -1.59294900 |
| N  | -1.04274300 | -0.61173800 | -1.94537400 |
| O  | 0.52460000  | -1.10658600 | 0.44249600  |
| P  | 0.18709600  | 1.38692100  | 1.69984700  |
| P  | -1.75207900 | 2.09224300  | 1.17156500  |
| Ti | -0.16587900 | 0.79048200  | -0.55557000 |
| C  | -2.58165000 | 1.33684000  | 3.85766000  |
| H  | -2.91965800 | 2.25027800  | 4.35845400  |
| H  | -3.00518800 | 0.47654200  | 4.39744000  |
| H  | -1.48890300 | 1.28002400  | 3.94193400  |
| C  | -3.06138200 | 4.53712200  | 0.56938300  |
| H  | -2.99738100 | 4.23007900  | -0.48170200 |
| H  | -4.01442000 | 4.18367900  | 0.97501600  |
| H  | -3.06831100 | 5.63735800  | 0.60766500  |
| C  | -0.24227200 | -2.03368200 | 2.54426000  |
| C  | -0.19372600 | -1.81895600 | 3.94018700  |
| C  | -1.25306800 | -2.84993800 | 2.00824600  |
| C  | -1.13687500 | -2.42364700 | 4.77442200  |
| H  | 0.56148100  | -1.15417000 | 4.35229600  |
| C  | -2.16643200 | -3.49281400 | 2.84882800  |
| H  | -1.32401200 | -2.95414800 | 0.93288100  |
| C  | -2.11107100 | -3.28109800 | 4.23397400  |
| H  | -1.11263000 | -2.23026000 | 5.84518100  |
| H  | -2.93268500 | -4.13493200 | 2.41883200  |
| H  | -2.83151200 | -3.76686100 | 4.88999000  |
| C  | 2.16633900  | -1.39075400 | 2.16790500  |
| C  | 2.63661400  | -2.48419400 | 2.93273000  |
| C  | 3.02217500  | -0.29693400 | 1.94046900  |
| C  | 3.93880400  | -2.48386100 | 3.44288600  |
| H  | 1.98805800  | -3.34089300 | 3.10174700  |
| C  | 4.30550900  | -0.27750300 | 2.49316100  |
| H  | 2.66385200  | 0.55212400  | 1.36882800  |
| C  | 4.77149000  | -1.37211100 | 3.23622000  |
| H  | 4.29783400  | -3.34128700 | 4.00911800  |
| H  | 4.93772200  | 0.59240300  | 2.33301900  |
| H  | 5.77694400  | -1.35915400 | 3.65395100  |

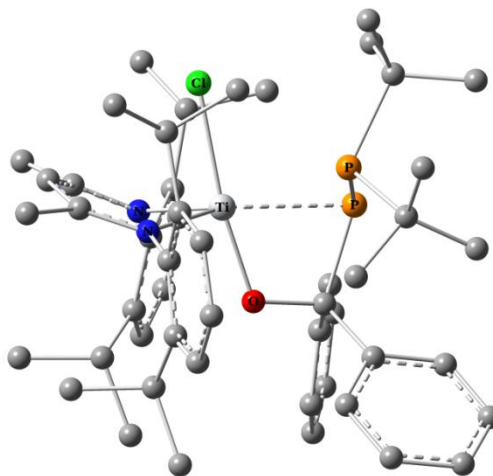

**Figure S168.** Optimized structure of **3ar**.

Below are presented xyz coordinates for optimized geometry of **3ar**:

|   |             |             |             |
|---|-------------|-------------|-------------|
| C | -2.84869200 | -1.42574400 | 0.23664800  |
| C | -3.59325500 | -1.27322400 | 1.43048900  |
| C | -4.93225900 | -0.85892800 | 1.31596900  |
| H | -5.52817200 | -0.73558300 | 2.21937800  |
| C | -5.50797600 | -0.60100300 | 0.07015600  |
| H | -6.54233900 | -0.26759000 | 0.00590000  |
| C | -4.75415100 | -0.76508100 | -1.09750300 |
| H | -5.21359000 | -0.56744600 | -2.06391700 |
| C | -3.41843200 | -1.18868000 | -1.04108400 |
| C | -3.02034700 | -1.59973600 | 2.80660000  |
| H | -2.02960600 | -2.04887400 | 2.66514300  |
| C | -2.82747200 | -0.32760500 | 3.65799500  |
| H | -2.43746100 | -0.59221700 | 4.64969900  |
| H | -2.11110200 | 0.35226700  | 3.18311500  |
| H | -3.78201700 | 0.20096900  | 3.79322600  |
| C | -3.91082700 | -2.60612500 | 3.57137800  |
| H | -3.40243000 | -2.93025200 | 4.48898000  |
| H | -4.86568500 | -2.14836200 | 3.86373900  |
| H | -4.13965200 | -3.49378100 | 2.96874300  |
| C | -2.64001300 | -1.51310600 | -2.31350700 |
| H | -1.57505000 | -1.50414800 | -2.05305000 |
| C | -2.85796100 | -0.49803600 | -3.44828600 |
| H | -2.25062300 | -0.78087000 | -4.31795500 |
| H | -3.90565500 | -0.46863600 | -3.77705800 |
| H | -2.56757900 | 0.50662500  | -3.13273700 |
| C | -3.00401900 | -2.93464100 | -2.80599300 |
| H | -2.77432800 | -3.69639200 | -2.05289200 |
| H | -4.07616300 | -2.99703600 | -3.03823900 |
| H | -2.43912700 | -3.17753300 | -3.71592700 |
| C | 2.45417600  | -1.45489200 | -1.39815400 |
| C | 2.35255600  | -0.84698400 | -2.67653900 |
| C | 3.53563300  | -0.40062300 | -3.29103200 |
| H | 3.48273600  | 0.07936900  | -4.26509200 |
| C | 4.78438100  | -0.57414100 | -2.68406300 |
| H | 5.68590500  | -0.21273200 | -3.17601300 |
| C | 4.86794400  | -1.23052100 | -1.45440400 |
| H | 5.84231900  | -1.39279100 | -0.99553800 |
| C | 3.71622700  | -1.69438700 | -0.79366800 |
| C | 1.01474000  | -0.76795300 | -3.41147200 |
| H | 0.26071400  | -0.41719400 | -2.69283900 |
| C | 1.03023500  | 0.19199200  | -4.61825900 |
| H | 0.00446600  | 0.34654000  | -4.97470700 |
| H | 1.45545800  | 1.17214700  | -4.37322500 |
| H | 1.61132400  | -0.22827200 | -5.45129800 |
| C | 0.58269600  | -2.16709200 | -3.91663700 |
| H | -0.31227300 | -2.07708100 | -4.54574700 |

|    |             |             |             |
|----|-------------|-------------|-------------|
| H  | 1.38048500  | -2.61875100 | -4.52169100 |
| H  | 0.34148400  | -2.84453100 | -3.09265000 |
| C  | 3.87977700  | -2.46122500 | 0.51642700  |
| H  | 2.90251300  | -2.85665100 | 0.81628600  |
| C  | 4.33858000  | -1.52599800 | 1.64627500  |
| H  | 4.41110300  | -2.07320700 | 2.59477800  |
| H  | 5.32213400  | -1.08995800 | 1.42056300  |
| H  | 3.60940800  | -0.71953600 | 1.76964500  |
| C  | 4.87441200  | -3.63693600 | 0.37501300  |
| H  | 4.85411800  | -4.25222600 | 1.28424200  |
| H  | 4.64260000  | -4.27748900 | -0.48405100 |
| H  | 5.90157700  | -3.26957500 | 0.24691300  |
| C  | -2.46457900 | -4.19735900 | 0.58870600  |
| H  | -2.28105300 | -5.20413000 | 0.20135200  |
| H  | -2.53955800 | -4.25678900 | 1.68274000  |
| H  | -3.42496300 | -3.83088000 | 0.21257500  |
| C  | -1.32356500 | -3.26924900 | 0.23009000  |
| C  | -0.11493500 | -3.84765600 | -0.16121800 |
| H  | -0.09410700 | -4.93465100 | -0.17618900 |
| C  | 1.01621700  | -3.22208000 | -0.73584600 |
| C  | 1.95313400  | -4.19969900 | -1.43387400 |
| H  | 1.36024700  | -4.90418900 | -2.02829800 |
| H  | 2.67566900  | -3.70447500 | -2.08487400 |
| H  | 2.50069800  | -4.78195400 | -0.68194500 |
| C  | -0.85825000 | 1.86601900  | -0.24626100 |
| C  | 1.89816100  | 1.32993200  | 3.64202300  |
| C  | 2.12278200  | 2.80099900  | 4.05246700  |
| H  | 3.08503700  | 3.20115400  | 3.72087100  |
| H  | 1.31867500  | 3.44083200  | 3.66818600  |
| H  | 2.10475200  | 2.85494500  | 5.15164900  |
| C  | 0.61565200  | 0.87147000  | 4.37553500  |
| H  | 0.30277300  | -0.13354800 | 4.08667000  |
| H  | 0.84287200  | 0.86952300  | 5.45294500  |
| H  | -0.21497300 | 1.56681500  | 4.21078900  |
| C  | 3.03301300  | 2.36998800  | 0.90069500  |
| C  | 3.13706200  | 1.86502700  | -0.55272500 |
| H  | 2.15758000  | 1.75503200  | -1.02058700 |
| H  | 3.71652100  | 2.58377000  | -1.15064200 |
| H  | 3.64272200  | 0.89637800  | -0.58781500 |
| C  | 4.43700900  | 2.21590200  | 1.52913700  |
| H  | 4.50025600  | 2.60803600  | 2.54924600  |
| H  | 4.77374700  | 1.17433600  | 1.52880600  |
| H  | 5.14078100  | 2.79228400  | 0.90925800  |
| Cl | 0.62413300  | -1.90350400 | 2.43794800  |
| N  | -1.49197900 | -1.92738700 | 0.26603300  |
| N  | 1.25060700  | -1.89521400 | -0.72600300 |
| O  | -0.50337200 | 0.57237600  | -0.79089400 |
| P  | -0.38282500 | 1.70853100  | 1.61426300  |
| P  | 1.75463200  | 1.16607000  | 1.69878000  |
| Ti | 0.05165300  | -0.63380100 | 0.53304400  |
| C  | 2.61761500  | 3.85122000  | 0.92673200  |
| H  | 2.61223000  | 4.26515100  | 1.93907500  |
| H  | 3.34030300  | 4.42735000  | 0.32828600  |
| H  | 1.62887000  | 3.99656300  | 0.48904500  |
| C  | 3.05879600  | 0.43998000  | 4.13491600  |
| H  | 2.83403400  | -0.61593200 | 3.95211500  |
| H  | 4.01517900  | 0.68494300  | 3.66193400  |
| H  | 3.17306000  | 0.58549900  | 5.21992800  |
| C  | -0.22025000 | 3.00720700  | -1.02137400 |
| C  | -0.42997000 | 4.33229700  | -0.59121300 |
| C  | 0.45135300  | 2.78168500  | -2.22755300 |
| C  | 0.05374400  | 5.40622900  | -1.34377900 |
| H  | -0.97595600 | 4.51063300  | 0.33477700  |
| C  | 0.94514400  | 3.85750200  | -2.98170500 |
| H  | 0.57771600  | 1.75788800  | -2.56209700 |
| C  | 0.75106000  | 5.17283400  | -2.54223700 |
| H  | -0.11046000 | 6.42528500  | -0.99720900 |
| H  | 1.47457600  | 3.66440300  | -3.91403900 |

|   |             |            |             |
|---|-------------|------------|-------------|
| H | 1.13099700  | 6.00916600 | -3.12648000 |
| C | -2.38696300 | 2.10120100 | -0.35863500 |
| C | -2.91403400 | 2.47852200 | -1.61080100 |
| C | -3.25481400 | 2.06833400 | 0.74290900  |
| C | -4.26283600 | 2.81510000 | -1.75604900 |
| H | -2.24929200 | 2.54984200 | -2.46877200 |
| C | -4.60396500 | 2.42764100 | 0.60585200  |
| H | -2.87870400 | 1.78257500 | 1.72170900  |
| C | -5.11387100 | 2.80577700 | -0.64061900 |
| H | -4.64237000 | 3.10629300 | -2.73444200 |
| H | -5.25230000 | 2.40396900 | 1.47999600  |
| H | -6.16017600 | 3.08914000 | -0.74418100 |

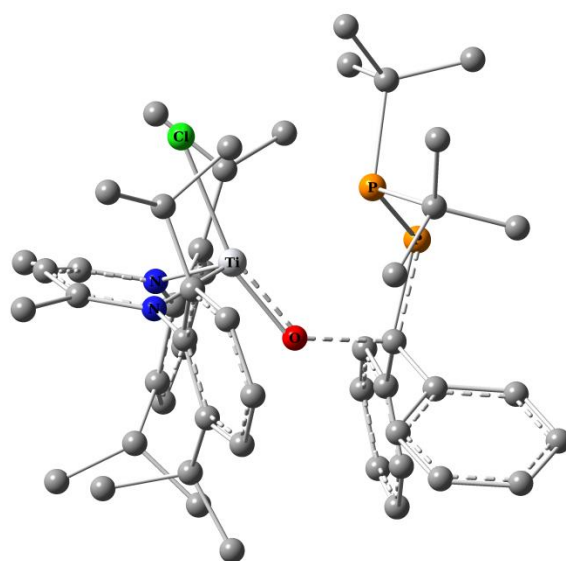

**Figure S169.** Optimized structure of **3ats2**.

Below are presented xyz coordinates for optimized geometry of **3ats2**:

|   |             |             |             |
|---|-------------|-------------|-------------|
| C | -2.93998400 | 0.88846000  | -0.85747600 |
| C | -3.47940000 | 0.03888300  | -1.85527000 |
| C | -4.84011400 | -0.29959500 | -1.75812400 |
| H | -5.28924800 | -0.92676300 | -2.52459000 |
| C | -5.62668500 | 0.14249200  | -0.68831400 |
| H | -6.67946900 | -0.13140500 | -0.63648200 |
| C | -5.04703500 | 0.89792200  | 0.33285900  |
| H | -5.64734000 | 1.19550400  | 1.19164100  |
| C | -3.69983300 | 1.29109600  | 0.26610400  |
| C | -2.61970400 | -0.48105700 | -3.00388700 |
| H | -1.61549200 | -0.65991000 | -2.58614700 |
| C | -3.12950400 | -1.82349700 | -3.56003700 |
| H | -2.42542800 | -2.20012200 | -4.30996200 |
| H | -3.22577800 | -2.58038900 | -2.77148700 |
| H | -4.10280900 | -1.71051000 | -4.05685400 |
| C | -2.46906300 | 0.53700900  | -4.15499600 |
| H | -1.88936900 | 0.08726600  | -4.97141700 |
| H | -3.45489600 | 0.82421200  | -4.54786800 |
| H | -1.93043700 | 1.43264700  | -3.83279200 |
| C | -3.09861800 | 2.11685600  | 1.39875700  |
| H | -2.06983200 | 2.37420600  | 1.12044100  |
| C | -3.04240700 | 1.27093600  | 2.68801800  |
| H | -2.64452300 | 1.86937300  | 3.51821400  |
| H | -4.04322200 | 0.92024400  | 2.97218700  |
| H | -2.40572200 | 0.39286600  | 2.54625000  |
| C | -3.87098800 | 3.43000800  | 1.65126100  |
| H | -3.90189000 | 4.06497600  | 0.75739700  |
| H | -4.90582500 | 3.23024700  | 1.95991300  |

|    |             |             |             |
|----|-------------|-------------|-------------|
| H  | -3.38708700 | 4.00160500  | 2.45407500  |
| C  | 2.04661000  | 2.23630900  | 0.86503100  |
| C  | 1.82988000  | 2.11456300  | 2.26567000  |
| C  | 2.95375300  | 1.93169300  | 3.08698900  |
| H  | 2.81926400  | 1.82234400  | 4.16022600  |
| C  | 4.24883900  | 1.89821600  | 2.55385000  |
| H  | 5.10320200  | 1.74444000  | 3.21103300  |
| C  | 4.44229500  | 2.08180700  | 1.18440800  |
| H  | 5.45239500  | 2.07925000  | 0.77738300  |
| C  | 3.35311600  | 2.25900300  | 0.31115400  |
| C  | 0.42808700  | 2.25168300  | 2.86019600  |
| H  | -0.24093700 | 1.61334800  | 2.26491900  |
| C  | 0.33574800  | 1.82003000  | 4.33623400  |
| H  | -0.71185700 | 1.84923600  | 4.65756700  |
| H  | 0.70401200  | 0.80294100  | 4.50375000  |
| H  | 0.89828300  | 2.50493800  | 4.98626500  |
| C  | -0.07716200 | 3.71188100  | 2.75404500  |
| H  | -1.04914700 | 3.80478500  | 3.25570000  |
| H  | 0.62713600  | 4.39701800  | 3.24491500  |
| H  | -0.20919300 | 4.03020500  | 1.71633100  |
| C  | 3.62090000  | 2.50129500  | -1.17314400 |
| H  | 2.67129200  | 2.73613300  | -1.66592000 |
| C  | 4.16796700  | 1.24125600  | -1.86959400 |
| H  | 4.36329900  | 1.44997900  | -2.92911600 |
| H  | 5.10320900  | 0.90553500  | -1.40037100 |
| H  | 3.43206500  | 0.43112500  | -1.82239700 |
| C  | 4.59349500  | 3.68520000  | -1.38064000 |
| H  | 4.65958600  | 3.92895900  | -2.44906200 |
| H  | 4.26947400  | 4.58167700  | -0.83790900 |
| H  | 5.60466100  | 3.43336800  | -1.03377600 |
| C  | -2.94904100 | 3.33092000  | -2.07538200 |
| H  | -3.48384100 | 2.59327600  | -2.67958300 |
| H  | -3.63145500 | 3.64521800  | -1.27614200 |
| H  | -2.71294800 | 4.20670700  | -2.68862300 |
| C  | -1.66912000 | 2.75805900  | -1.48981300 |
| C  | -0.59814100 | 3.65988200  | -1.34785000 |
| H  | -0.75279300 | 4.64815700  | -1.77347300 |
| C  | 0.55492600  | 3.51154300  | -0.55975300 |
| C  | 1.37401500  | 4.76213500  | -0.30491900 |
| H  | 0.71166400  | 5.62410800  | -0.17027700 |
| H  | 2.01262300  | 4.65609100  | 0.57627700  |
| H  | 2.01610900  | 4.96483200  | -1.17207000 |
| C  | -0.53251900 | -2.14371000 | 1.00014000  |
| C  | 1.66552900  | -2.49740700 | -3.11033200 |
| C  | 1.97647300  | -4.01083400 | -3.13132300 |
| H  | 2.97301800  | -4.24374700 | -2.74292000 |
| H  | 1.23632400  | -4.57591600 | -2.55053600 |
| H  | 1.93681800  | -4.36233500 | -4.17385800 |
| C  | 0.29823500  | -2.29266100 | -3.79436900 |
| H  | 0.02601900  | -1.23307500 | -3.81909800 |
| H  | 0.37725100  | -2.65213900 | -4.83208700 |
| H  | -0.49271800 | -2.85693700 | -3.29097900 |
| C  | 3.21514600  | -2.36876300 | -0.40392200 |
| C  | 3.43630700  | -1.32929400 | 0.71049800  |
| H  | 2.55479100  | -1.20366100 | 1.33933000  |
| H  | 4.26656300  | -1.65242200 | 1.35669600  |
| H  | 3.69444700  | -0.35373500 | 0.28949500  |
| C  | 4.47977100  | -2.35605300 | -1.28957300 |
| H  | 4.47303000  | -3.13940900 | -2.05423200 |
| H  | 4.64823000  | -1.38929500 | -1.77161600 |
| H  | 5.33966000  | -2.55008700 | -0.62943500 |
| Cl | 0.83323900  | 1.11413200  | -2.95221400 |
| N  | -1.63144300 | 1.47906500  | -1.04419200 |
| N  | 0.90408400  | 2.32865500  | -0.01368800 |
| O  | -0.21787900 | -0.33089700 | 0.69440700  |
| P  | -0.23323900 | -2.89689300 | -0.64392700 |
| P  | 1.56669700  | -1.82863300 | -1.30073600 |
| Ti | 0.19345000  | 0.56371600  | -0.73027200 |

|   |             |             |             |
|---|-------------|-------------|-------------|
| C | 3.06265400  | -3.78068000 | 0.19154900  |
| H | 2.92527800  | -4.53847000 | -0.58756900 |
| H | 3.97652900  | -4.02617100 | 0.75525900  |
| H | 2.21429500  | -3.84087100 | 0.87530100  |
| C | 2.71058700  | -1.71759700 | -3.94212400 |
| H | 2.51031800  | -0.64191700 | -3.91141700 |
| H | 3.73763200  | -1.90077200 | -3.62009100 |
| H | 2.62800000  | -2.05024500 | -4.98820400 |
| C | 0.39950500  | -2.40880000 | 2.15950900  |
| C | 0.57619800  | -3.75530900 | 2.54628000  |
| C | 0.99333600  | -1.40603500 | 2.93977800  |
| C | 1.34574700  | -4.08412800 | 3.66779900  |
| H | 0.10221100  | -4.53725000 | 1.95507500  |
| C | 1.78081900  | -1.73570900 | 4.05256400  |
| H | 0.85253100  | -0.37319800 | 2.64230200  |
| C | 1.96053100  | -3.07383200 | 4.42407200  |
| H | 1.47112800  | -5.12974900 | 3.94440400  |
| H | 2.26046800  | -0.94113800 | 4.62256400  |
| H | 2.57125300  | -3.32823900 | 5.28866900  |
| C | -1.97327400 | -2.21702500 | 1.43529700  |
| C | -2.31874900 | -2.24900300 | 2.80680800  |
| C | -3.01542100 | -2.29307100 | 0.48745900  |
| C | -3.65273400 | -2.37502200 | 3.20983300  |
| H | -1.53938000 | -2.18671100 | 3.56126200  |
| C | -4.34334600 | -2.45216100 | 0.88989700  |
| H | -2.76436800 | -2.24014600 | -0.56835500 |
| C | -4.67102600 | -2.48965400 | 2.25328800  |
| H | -3.89281800 | -2.39410500 | 4.27183300  |
| H | -5.12375000 | -2.52934800 | 0.13722000  |
| H | -5.70839100 | -2.60205600 | 2.56523400  |

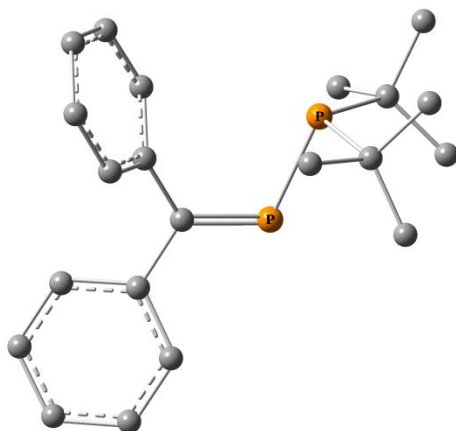

**Figure S170.** Optimized structure of **3a**.

Below are presented xyz coordinates for optimized geometry of **3a**:

|   |             |             |             |
|---|-------------|-------------|-------------|
| C | -0.66538800 | 3.44050400  | -1.20975300 |
| C | -0.63070100 | 2.04241500  | -1.23825000 |
| C | -1.26497400 | 1.28762200  | -0.22994200 |
| C | -1.94599200 | 1.97227000  | 0.80048300  |
| C | -1.95842500 | 3.37087400  | 0.84213900  |
| C | -1.31881800 | 4.11011500  | -0.16439000 |
| H | -0.17910700 | 4.00721000  | -2.00177800 |
| H | -2.47205200 | 3.88236200  | 1.65441700  |
| C | -1.24260500 | -0.19701200 | -0.23992100 |
| P | 0.14604900  | -1.21381400 | -0.38854600 |
| P | 1.86778500  | 0.19610200  | -0.15547900 |
| C | 2.24261100  | -0.09056000 | 1.71724200  |
| C | 1.22492700  | 0.83201200  | 2.42891400  |
| C | 2.06774700  | -1.52202500 | 2.26102400  |
| C | 3.67010300  | 0.40901000  | 2.01717000  |
| H | 1.31400300  | 1.87095800  | 2.08821100  |
| H | 0.19505700  | 0.50121300  | 2.24395700  |

|   |             |             |             |
|---|-------------|-------------|-------------|
| H | 1.40143500  | 0.80172200  | 3.51505900  |
| H | 2.75955800  | -2.23277200 | 1.79878200  |
| H | 2.25742900  | -1.52043100 | 3.34594200  |
| H | 1.04533400  | -1.88841100 | 2.10019500  |
| H | 3.81053000  | 0.47214400  | 3.10720800  |
| H | 4.42964600  | -0.27822900 | 1.62508900  |
| H | 3.84807500  | 1.40628200  | 1.59338900  |
| C | 3.13972700  | -0.74955300 | -1.24330000 |
| C | 4.40873400  | 0.12732700  | -1.35383000 |
| C | 3.52105800  | -2.17055400 | -0.79102800 |
| C | 2.49067500  | -0.81579200 | -2.64674900 |
| H | 4.15832400  | 1.14283300  | -1.68661800 |
| H | 4.94512300  | 0.20249400  | -0.40189800 |
| H | 5.09518900  | -0.31693400 | -2.09093900 |
| H | 2.63531000  | -2.80388700 | -0.65466100 |
| H | 4.16066700  | -2.64075700 | -1.55445900 |
| H | 4.08711400  | -2.15515900 | 0.14808000  |
| H | 3.22449800  | -1.20133800 | -3.37055100 |
| H | 1.61810400  | -1.48282700 | -2.66096400 |
| H | 2.16885500  | 0.17886300  | -2.98510200 |
| H | -0.12632200 | 1.52061700  | -2.04767700 |
| H | -2.44924600 | 1.39728900  | 1.57602700  |
| H | -1.33674400 | 5.19821900  | -0.13882700 |
| C | -2.56288500 | -0.86585700 | -0.13153900 |
| C | -2.71143200 | -2.11498800 | 0.51635100  |
| C | -3.71237700 | -0.26795100 | -0.70283200 |
| C | -3.95418500 | -2.75385700 | 0.56647200  |
| H | -1.84378500 | -2.56316000 | 0.99713600  |
| C | -4.95350600 | -0.90968900 | -0.65210500 |
| H | -3.61650800 | 0.69356600  | -1.20269200 |
| C | -5.08064300 | -2.15573300 | -0.01879700 |
| H | -4.04789000 | -3.71027500 | 1.07793200  |
| H | -5.82241000 | -0.43801200 | -1.10787900 |
| H | -6.04961300 | -2.64937700 | 0.02883100  |

### E.3.3. Reaction of **1** with 9-fluorenone leading to **3b**

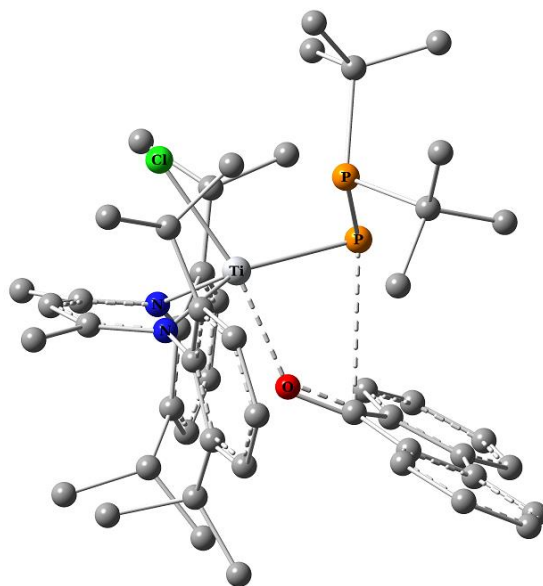

**Figure S171.** Optimized structure of **3b<sub>TS1</sub>**.

Below are presented xyz coordinates for optimized geometry of **3b<sub>TS1</sub>**:

|   |            |             |             |
|---|------------|-------------|-------------|
| C | 2.81007344 | -1.18331452 | 1.04310428  |
| C | 3.49013281 | -2.00797421 | 0.11009133  |
| C | 4.86200552 | -1.76823823 | -0.09942062 |
| H | 5.40744042 | -2.40047690 | -0.79774152 |



|   |             |             |             |
|---|-------------|-------------|-------------|
| C | 5.53961954  | -0.74662387 | 0.57325874  |
| H | 6.60262508  | -0.58755727 | 0.39806140  |
| C | 4.84157791  | 0.07950066  | 1.46014774  |
| H | 5.36456512  | 0.89093575  | 1.96386647  |
| C | 3.47229402  | -0.11484398 | 1.70640509  |
| C | 2.80623088  | -3.15359764 | -0.62838303 |
| H | 1.72056990  | -3.01145777 | -0.54009071 |
| C | 3.16133809  | -3.15878978 | -2.12844506 |
| H | 2.61639273  | -3.96596530 | -2.63266833 |
| H | 2.88235103  | -2.20898276 | -2.60006296 |
| H | 4.23374205  | -3.33395625 | -2.29102558 |
| C | 3.16131561  | -4.52044840 | -0.00103551 |
| H | 2.63858759  | -5.32350215 | -0.53675863 |
| H | 4.24246762  | -4.70881011 | -0.06531179 |
| H | 2.86906488  | -4.56975707 | 1.05254922  |
| C | 2.73699087  | 0.80416797  | 2.67749252  |
| H | 1.66335902  | 0.62611327  | 2.54573321  |
| C | 3.01372709  | 2.29242398  | 2.38081606  |
| H | 2.39373377  | 2.92257678  | 3.03098232  |
| H | 4.06318091  | 2.55383570  | 2.57226255  |
| H | 2.78819956  | 2.54084003  | 1.33833374  |
| C | 3.10687000  | 0.48286563  | 4.14348854  |
| H | 2.84736291  | -0.54790935 | 4.40729388  |
| H | 4.18531826  | 0.61573508  | 4.30775728  |
| H | 2.57065073  | 1.15450179  | 4.82685436  |
| C | -2.36556278 | 0.58161930  | 1.89101832  |
| C | -2.13455405 | 1.94256280  | 2.23764675  |
| C | -3.21205503 | 2.84158806  | 2.13532787  |
| H | -3.05579122 | 3.88918338  | 2.38309329  |
| C | -4.48107361 | 2.41944040  | 1.72168064  |
| H | -5.29426863 | 3.13827754  | 1.63277745  |
| C | -4.70535172 | 1.06572392  | 1.46370423  |
| H | -5.70497984 | 0.72709341  | 1.19351333  |
| C | -3.66983991 | 0.11972040  | 1.56927019  |
| C | -0.77874925 | 2.41452332  | 2.76775077  |
| H | -0.01336863 | 1.94188311  | 2.14064116  |
| C | -0.58462892 | 3.94330381  | 2.70971009  |
| H | 0.45291720  | 4.18626853  | 2.97015080  |
| H | -0.78327923 | 4.35812085  | 1.71576270  |
| H | -1.23146827 | 4.45676934  | 3.43534744  |
| C | -0.54530220 | 1.95815224  | 4.22897603  |
| H | 0.37398688  | 2.41841290  | 4.61557041  |
| H | -1.37927062 | 2.27129240  | 4.87170476  |
| H | -0.42863680 | 0.87413827  | 4.30852501  |
| C | -4.01231992 | -1.36409583 | 1.43953466  |
| H | -3.10957186 | -1.94811621 | 1.65038032  |
| C | -4.46578211 | -1.74873112 | 0.02128864  |
| H | -4.76071379 | -2.80548239 | -0.00801945 |
| H | -5.32362259 | -1.14134961 | -0.30094148 |
| H | -3.63890405 | -1.60972130 | -0.68356936 |
| C | -5.11242529 | -1.75833097 | 2.45540213  |
| H | -5.23152863 | -2.84989371 | 2.46874660  |
| H | -4.87812539 | -1.42063986 | 3.47184491  |
| H | -6.08006245 | -1.32037824 | 2.17482447  |
| C | 2.28120405  | -2.90118362 | 3.21966646  |
| H | 3.29219935  | -2.60976700 | 2.92457176  |
| H | 2.20014668  | -2.87156682 | 4.31126351  |
| H | 2.11933658  | -3.94056175 | 2.90081386  |
| C | 1.21053756  | -2.03887641 | 2.57407264  |
| C | 0.00016402  | -1.93748857 | 3.26398824  |
| H | -0.06106143 | -2.51413005 | 4.18438746  |
| C | -1.10538927 | -1.08801215 | 3.02197154  |
| C | -2.12516439 | -1.05992963 | 4.15075169  |
| H | -1.61825332 | -1.10683168 | 5.12068005  |
| H | -2.76026285 | -0.17159404 | 4.12024188  |
| H | -2.76678914 | -1.94745438 | 4.06749711  |
| C | 0.91261246  | 1.95530282  | -0.65849698 |
| C | -1.65793435 | -2.94169633 | -3.12114542 |

|    |             |             |             |
|----|-------------|-------------|-------------|
| C  | -1.65451188 | -2.67116119 | -4.64070607 |
| H  | -2.53075560 | -2.11295855 | -4.98443902 |
| H  | -0.75077077 | -2.12147659 | -4.93327726 |
| H  | -1.65073433 | -3.63781649 | -5.16816024 |
| C  | -0.42403689 | -3.81762172 | -2.82413252 |
| H  | -0.31594709 | -4.02693684 | -1.75686440 |
| H  | -0.53929593 | -4.77129990 | -3.36281693 |
| H  | 0.48782724  | -3.32558986 | -3.17968961 |
| C  | -2.57878599 | 0.07294464  | -2.94473219 |
| C  | -2.74270514 | 1.09944379  | -1.81199329 |
| H  | -1.76297360 | 1.33523550  | -1.38390336 |
| H  | -3.17824783 | 2.03162936  | -2.20210793 |
| H  | -3.38435790 | 0.72302875  | -1.00875712 |
| C  | -3.98044128 | -0.40075256 | -3.38000652 |
| H  | -3.95450128 | -1.08709996 | -4.23243520 |
| H  | -4.52203255 | -0.88407756 | -2.56035202 |
| H  | -4.56185483 | 0.48260772  | -3.68698771 |
| Cl | -0.90886344 | -3.18797301 | 0.52021030  |
| N  | 1.43187202  | -1.42554361 | 1.38334582  |
| N  | -1.26666532 | -0.35372434 | 1.90853085  |
| O  | 0.55194031  | 1.10838582  | 0.20663242  |
| P  | 0.51504642  | -0.66266341 | -2.10465003 |
| P  | -1.50736332 | -1.30808863 | -2.11342975 |
| Ti | -0.15415135 | -0.98052527 | 0.13870426  |
| C  | -1.84661766 | 0.74163739  | -4.12463626 |
| H  | -1.69819492 | 0.05264689  | -4.96300518 |
| H  | -2.44342623 | 1.59577414  | -4.48199574 |
| H  | -0.86362439 | 1.11173894  | -3.80667958 |
| C  | -2.93506251 | -3.68971128 | -2.68423099 |
| H  | -2.89212524 | -3.92338186 | -1.61420541 |
| H  | -3.84376288 | -3.10833333 | -2.87936503 |
| H  | -3.01349808 | -4.63460936 | -3.24417474 |
| C  | 0.14599821  | 3.16259742  | -1.05552437 |
| C  | -1.12049990 | 3.59461857  | -0.65798002 |
| C  | 0.92528797  | 3.91893691  | -1.97159978 |
| C  | -1.62231883 | 4.79130191  | -1.19755400 |
| H  | -1.70918196 | 3.01532358  | 0.04715396  |
| C  | 0.42603271  | 5.10560341  | -2.50632401 |
| C  | -0.85865881 | 5.53408382  | -2.11178287 |
| H  | -2.61083747 | 5.13979704  | -0.90507201 |
| H  | 1.00772142  | 5.69481913  | -3.21290245 |
| H  | -1.26264104 | 6.45775204  | -2.52293490 |
| C  | 2.20800058  | 2.03549573  | -1.38691214 |
| C  | 2.20970065  | 3.21927261  | -2.17467532 |
| C  | 3.30336542  | 1.16951160  | -1.39396291 |
| C  | 3.30704894  | 3.53589453  | -2.97323014 |
| C  | 4.41084135  | 1.49444082  | -2.19325792 |
| H  | 3.28605163  | 0.25263406  | -0.81846127 |
| C  | 4.41326071  | 2.66113627  | -2.97401700 |
| H  | 3.31689600  | 4.43524690  | -3.58657363 |
| H  | 5.26807937  | 0.82516965  | -2.20866656 |
| H  | 5.27871764  | 2.89391218  | -3.59218271 |

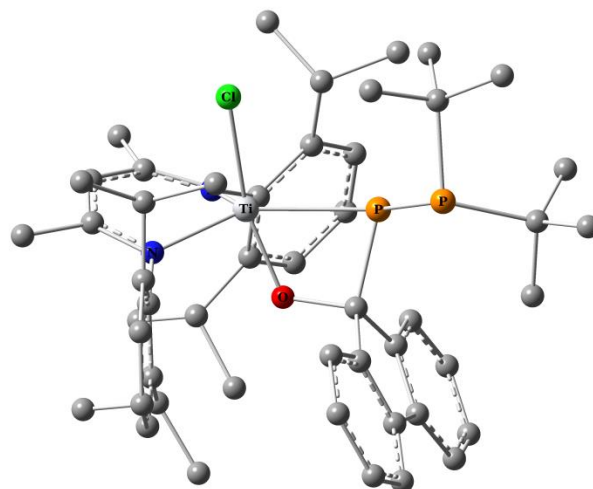

**Figure S172.** Optimized structure of **3br**.

Below are presented xyz coordinates for optimized geometry of **3br**:

|   |             |             |             |
|---|-------------|-------------|-------------|
| C | 1.16768200  | 2.95685700  | -0.79879000 |
| C | 0.07243700  | 3.59217800  | -1.44030700 |
| C | -0.36116000 | 4.82514200  | -0.92413800 |
| H | -1.19658100 | 5.33515900  | -1.39710100 |
| C | 0.25635900  | 5.40889900  | 0.18886800  |
| H | -0.09593400 | 6.36741000  | 0.56685400  |
| C | 1.30839400  | 4.74674600  | 0.82424400  |
| H | 1.76579700  | 5.18595000  | 1.70953500  |
| C | 1.77679900  | 3.50627200  | 0.35600900  |
| C | -0.60020300 | 2.97812200  | -2.66313700 |
| H | -0.60183700 | 1.88841000  | -2.52098100 |
| C | -2.06914400 | 3.40684400  | -2.81853700 |
| H | -2.52726000 | 2.84493900  | -3.64058400 |
| H | -2.63632500 | 3.19960900  | -1.90263800 |
| H | -2.16163500 | 4.47489600  | -3.05964000 |
| C | 0.19102900  | 3.26065900  | -3.95853200 |
| H | -0.33208300 | 2.82056200  | -4.81711000 |
| H | 0.29293000  | 4.34171200  | -4.12716400 |
| H | 1.19080600  | 2.81698300  | -3.91773800 |
| C | 2.88967300  | 2.79538000  | 1.11771500  |
| H | 3.05937800  | 1.82053900  | 0.64526100  |
| C | 2.47059900  | 2.53980900  | 2.58091200  |
| H | 3.28728700  | 2.04308500  | 3.12010500  |
| H | 2.25100800  | 3.48124600  | 3.10126400  |
| H | 1.57872400  | 1.90786600  | 2.62527400  |
| C | 4.21173000  | 3.59434600  | 1.07326600  |
| H | 4.52597000  | 3.80550600  | 0.04447000  |
| H | 4.10424600  | 4.55556400  | 1.59411300  |
| H | 5.01135500  | 3.02862200  | 1.56982100  |
| C | 2.34138000  | -2.37209800 | -0.03161800 |
| C | 2.67334600  | -2.31868500 | 1.34771400  |
| C | 2.67056400  | -3.52075700 | 2.07308900  |
| H | 2.91514700  | -3.50190700 | 3.13209900  |
| C | 2.33671100  | -4.73733900 | 1.46983200  |
| H | 2.33247100  | -5.65475000 | 2.05645400  |
| C | 1.99532800  | -4.76620700 | 0.11707100  |
| H | 1.72106500  | -5.71067700 | -0.35068300 |
| C | 1.99373800  | -3.59340500 | -0.65985600 |
| C | 3.04326300  | -1.00735400 | 2.03051500  |
| H | 2.48259300  | -0.21670800 | 1.52065400  |
| C | 2.62772500  | -0.98794500 | 3.51436600  |
| H | 2.76296400  | 0.01820600  | 3.92652100  |
| H | 1.57397100  | -1.26650000 | 3.63008600  |
| H | 3.23843900  | -1.67266700 | 4.11931800  |
| C | 4.55244400  | -0.70781900 | 1.88024300  |

|    |             |             |             |
|----|-------------|-------------|-------------|
| H  | 4.80392700  | 0.23429300  | 2.38608300  |
| H  | 5.15649300  | -1.50901000 | 2.32819400  |
| H  | 4.83994300  | -0.60892200 | 0.82627100  |
| C  | 1.56699800  | -3.67654100 | -2.11928500 |
| H  | 1.74514300  | -2.70384000 | -2.59226300 |
| C  | 0.05113400  | -3.95272100 | -2.19309800 |
| H  | -0.29581100 | -3.93412500 | -3.23337300 |
| H  | -0.18649100 | -4.93443400 | -1.76040200 |
| H  | -0.51294400 | -3.19415200 | -1.63745900 |
| C  | 2.34718900  | -4.74839700 | -2.91066300 |
| H  | 2.07117200  | -4.70133500 | -3.97206000 |
| H  | 3.43260200  | -4.60676600 | -2.82912300 |
| H  | 2.11628500  | -5.75996100 | -2.55090600 |
| C  | 3.46692900  | 2.91132000  | -2.52119900 |
| H  | 4.45374200  | 3.07114700  | -2.07066300 |
| H  | 3.61428400  | 2.79587200  | -3.60288000 |
| H  | 2.84576700  | 3.79081100  | -2.33762600 |
| C  | 2.83522900  | 1.64499300  | -1.97003800 |
| C  | 3.56257200  | 0.45039600  | -2.16625700 |
| H  | 4.45232900  | 0.55611300  | -2.78252200 |
| C  | 3.40730400  | -0.81244300 | -1.55335700 |
| C  | 4.51655500  | -1.82407400 | -1.75364400 |
| H  | 5.42166200  | -1.33914300 | -2.13074500 |
| H  | 4.74285900  | -2.34677500 | -0.81781100 |
| H  | 4.19861700  | -2.58302800 | -2.48015900 |
| C  | -3.80726100 | -1.21332700 | -2.40803800 |
| C  | -3.53004100 | 0.12415800  | -3.12065800 |
| H  | -4.11112700 | 0.94942600  | -2.69844500 |
| H  | -2.46567600 | 0.38175600  | -3.06280000 |
| H  | -3.79060000 | 0.02854900  | -4.18711200 |
| C  | -2.89318700 | -2.29446000 | -3.02142800 |
| H  | -3.06160200 | -3.27345400 | -2.55441000 |
| H  | -3.10359900 | -2.38174300 | -4.09889500 |
| H  | -1.84040000 | -2.02274700 | -2.91115400 |
| C  | -4.82086800 | -0.27498700 | 0.38846400  |
| C  | -4.27332000 | 0.04830700  | 1.79358000  |
| H  | -3.51026000 | 0.83263200  | 1.75106200  |
| H  | -5.09398300 | 0.41865000  | 2.42676000  |
| H  | -3.84108800 | -0.83671500 | 2.27747100  |
| C  | -6.01699400 | -1.23908600 | 0.57100800  |
| H  | -6.51572900 | -1.48581900 | -0.37081400 |
| H  | -5.69511700 | -2.17501400 | 1.04639200  |
| H  | -6.76054400 | -0.76184400 | 1.22800100  |
| Cl | 0.28561700  | -0.54202400 | -3.26766500 |
| N  | 1.66167200  | 1.69865800  | -1.30390200 |
| N  | 2.34014800  | -1.13777400 | -0.79178500 |
| O  | 0.46812200  | 0.19486400  | 0.77717100  |
| P  | -1.75538300 | 0.24832700  | -0.43364000 |
| P  | -3.41235100 | -1.24081500 | -0.51823900 |
| Ti | 0.66076900  | -0.02449600 | -1.04855400 |
| C  | -5.26601600 | 1.04117200  | -0.27221400 |
| H  | -5.76584100 | 0.87929200  | -1.23426900 |
| H  | -5.97796700 | 1.55983600  | 0.38938700  |
| H  | -4.40429100 | 1.70336700  | -0.43033100 |
| C  | -5.26946100 | -1.64328200 | -2.64892000 |
| H  | -5.50758000 | -2.58154400 | -2.13058400 |
| H  | -5.98873300 | -0.87747200 | -2.33870600 |
| H  | -5.40857200 | -1.81111000 | -3.72792400 |
| C  | -0.88615100 | 0.07183600  | 1.27101300  |
| C  | -1.02051100 | -1.19350100 | 2.09457200  |
| C  | -1.15198800 | 1.16429000  | 2.29106300  |
| C  | -0.86763000 | -2.51595700 | 1.68775400  |
| C  | -1.28104100 | -0.86812100 | 3.44851900  |
| C  | -1.18056600 | 2.54179200  | 2.08938900  |
| C  | -1.36246000 | 0.59908500  | 3.57056600  |
| C  | -0.98059300 | -3.53392800 | 2.64984200  |
| H  | -0.66506800 | -2.75825200 | 0.64707400  |
| C  | -1.40287300 | -1.88462400 | 4.40508000  |

|   |             |             |            |
|---|-------------|-------------|------------|
| C | -1.41874200 | 3.37396800  | 3.19705100 |
| H | -1.02480700 | 2.95842800  | 1.09647300 |
| C | -1.60885000 | 1.43008400  | 4.67155000 |
| C | -1.24899000 | -3.21978200 | 3.99309800 |
| H | -0.85799600 | -4.57251600 | 2.34962300 |
| H | -1.60615500 | -1.65038100 | 5.44913700 |
| C | -1.63146200 | 2.82173000  | 4.47274800 |
| H | -1.43986400 | 4.45428200  | 3.06359100 |
| H | -1.78233600 | 1.01330300  | 5.66279200 |
| H | -1.33813200 | -4.02139400 | 4.72479100 |
| H | -1.82071300 | 3.48098000  | 5.31870300 |

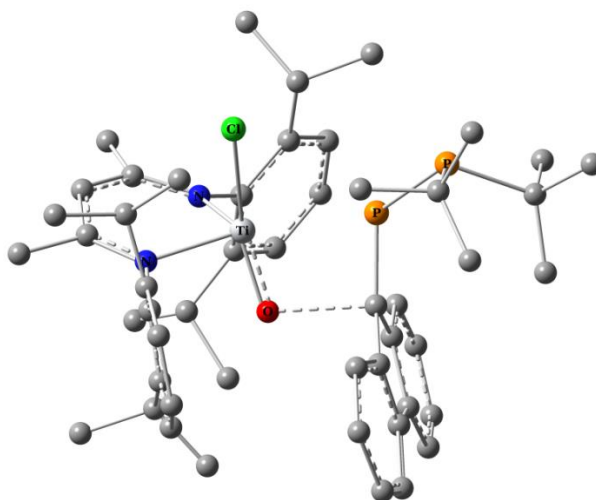

**Figure S173.** Optimized structure of **3bTs2**.

Below are presented xyz coordinates for optimized geometry of **3bTs2**:

|   |             |             |             |
|---|-------------|-------------|-------------|
| C | 0.87085600  | 2.99791900  | -0.96926000 |
| C | -0.18307700 | 3.35986500  | -1.85158400 |
| C | -0.89880200 | 4.53600000  | -1.56553600 |
| H | -1.70690700 | 4.83906600  | -2.22764300 |
| C | -0.59521800 | 5.32042800  | -0.44574700 |
| H | -1.16180500 | 6.22970700  | -0.24868600 |
| C | 0.42403400  | 4.92566400  | 0.42551400  |
| H | 0.64119400  | 5.52425000  | 1.30943200  |
| C | 1.17029400  | 3.75833500  | 0.18848200  |
| C | -0.52209500 | 2.52532100  | -3.08329400 |
| H | -0.26954000 | 1.48147800  | -2.85839300 |
| C | -2.02097900 | 2.56609200  | -3.43366500 |
| H | -2.24001300 | 1.79605100  | -4.18327600 |
| H | -2.63589000 | 2.36046200  | -2.55022400 |
| H | -2.31762200 | 3.53784000  | -3.85442700 |
| C | 0.32464500  | 2.92896700  | -4.31179400 |
| H | 0.00201900  | 2.34866700  | -5.18589500 |
| H | 0.20303600  | 3.99740600  | -4.54004900 |
| H | 1.38818200  | 2.72286700  | -4.15335600 |
| C | 2.24908000  | 3.33914400  | 1.18088000  |
| H | 2.72723700  | 2.43014500  | 0.79627300  |
| C | 1.62456000  | 2.99558200  | 2.55025600  |
| H | 2.41609600  | 2.72724200  | 3.26249800  |
| H | 1.07817700  | 3.85576500  | 2.95972200  |
| H | 0.93382900  | 2.15228500  | 2.45690600  |
| C | 3.33311700  | 4.42753500  | 1.34767500  |
| H | 3.77432200  | 4.71770700  | 0.38618700  |
| H | 2.91553100  | 5.33248700  | 1.80983500  |
| H | 4.13728400  | 4.05946800  | 1.99869600  |
| C | 2.72774600  | -1.99528900 | 0.25731000  |
| C | 2.75090600  | -1.88108400 | 1.67620500  |
| C | 2.61694000  | -3.04890400 | 2.44176600  |

|    |             |             |             |
|----|-------------|-------------|-------------|
| H  | 2.62291900  | -2.97659900 | 3.52690400  |
| C  | 2.47264400  | -4.30257600 | 1.83782200  |
| H  | 2.35829400  | -5.19586700 | 2.45067900  |
| C  | 2.50074800  | -4.40351400 | 0.44639600  |
| H  | 2.42389200  | -5.38317600 | -0.02334300 |
| C  | 2.63871900  | -3.26707000 | -0.37373900 |
| C  | 3.00630100  | -0.54279600 | 2.36031300  |
| H  | 2.65180800  | 0.24201000  | 1.68392900  |
| C  | 2.23445300  | -0.39722400 | 3.68378600  |
| H  | 2.38227900  | 0.60878700  | 4.09362200  |
| H  | 1.16240000  | -0.54797300 | 3.51943200  |
| H  | 2.58120700  | -1.11201000 | 4.44319200  |
| C  | 4.52408700  | -0.34124400 | 2.57929700  |
| H  | 4.71353100  | 0.63835100  | 3.04005100  |
| H  | 4.93121700  | -1.11808600 | 3.24152000  |
| H  | 5.07241800  | -0.38325800 | 1.63004800  |
| C  | 2.75825300  | -3.47798600 | -1.88070900 |
| H  | 2.80393300  | -2.49648300 | -2.36591200 |
| C  | 1.53624400  | -4.21938000 | -2.46096300 |
| H  | 1.63381900  | -4.30314200 | -3.55109100 |
| H  | 1.45604100  | -5.23467200 | -2.04736200 |
| H  | 0.61526500  | -3.67414300 | -2.24735600 |
| C  | 4.04190600  | -4.27669600 | -2.21720200 |
| H  | 4.17585500  | -4.32867500 | -3.30615100 |
| H  | 4.93984300  | -3.82754700 | -1.77822400 |
| H  | 3.96707600  | -5.30530500 | -1.83840400 |
| C  | 3.31864300  | 3.30009300  | -2.34259300 |
| H  | 3.99811200  | 3.16628300  | -3.19125800 |
| H  | 2.47161500  | 3.92070400  | -2.64590400 |
| H  | 3.86356700  | 3.84178500  | -1.55853100 |
| C  | 2.87700300  | 1.94669700  | -1.81490200 |
| C  | 3.82234700  | 0.91183300  | -1.85457100 |
| H  | 4.75385400  | 1.14655700  | -2.36444600 |
| C  | 3.80110400  | -0.32841500 | -1.16822500 |
| C  | 5.09905900  | -1.11140500 | -1.15755600 |
| H  | 5.94461800  | -0.43661000 | -0.98164100 |
| H  | 5.09126800  | -1.89057600 | -0.39018900 |
| H  | 5.24981000  | -1.58794700 | -2.13490100 |
| C  | -4.91981800 | -0.25451200 | -0.63310000 |
| C  | -4.88588700 | -0.46799200 | 0.89203300  |
| H  | -4.78463700 | -1.52056500 | 1.17059900  |
| H  | -4.06217200 | 0.09206700  | 1.34760900  |
| H  | -5.82239600 | -0.08810400 | 1.33061100  |
| C  | -4.96582800 | 1.26677500  | -0.91343200 |
| H  | -5.01740700 | 1.47433500  | -1.98976300 |
| H  | -5.85812700 | 1.69536200  | -0.43182800 |
| H  | -4.07953000 | 1.77042100  | -0.50716500 |
| C  | -3.38504800 | -2.83918600 | -1.57203500 |
| C  | -1.93472800 | -3.23654500 | -1.90408600 |
| H  | -1.23375800 | -2.91005100 | -1.12821600 |
| H  | -1.86826300 | -4.33081000 | -1.99955800 |
| H  | -1.59803600 | -2.78086100 | -2.84265600 |
| C  | -4.27827300 | -3.32506200 | -2.74280000 |
| H  | -5.33668300 | -3.08861900 | -2.58748800 |
| H  | -3.96040600 | -2.87804300 | -3.69284800 |
| H  | -4.18816500 | -4.41896500 | -2.82873700 |
| Cl | 0.68221500  | -0.94929600 | -2.88651300 |
| N  | 1.65408900  | 1.81895900  | -1.25114600 |
| N  | 2.72485100  | -0.77666200 | -0.51961000 |
| O  | 0.56335500  | 0.24407800  | 0.95961000  |
| P  | -1.74730300 | 0.13470400  | -0.70748200 |
| P  | -3.42477300 | -0.91839000 | -1.64676400 |
| Ti | 0.82555900  | 0.06400500  | -0.72512300 |
| C  | -3.84365600 | -3.50949400 | -0.26625600 |
| H  | -4.91352100 | -3.35317800 | -0.08345500 |
| H  | -3.67695100 | -4.59602300 | -0.34083100 |
| H  | -3.28908600 | -3.14385800 | 0.60336600  |
| C  | -6.20036900 | -0.89246800 | -1.22070200 |

|   |             |             |             |
|---|-------------|-------------|-------------|
| H | -6.23905900 | -0.78814200 | -2.31293400 |
| H | -6.28480800 | -1.95561700 | -0.96732300 |
| H | -7.07849100 | -0.38091200 | -0.79858300 |
| C | -1.57188300 | 0.00656000  | 1.08646600  |
| C | -1.54230200 | -1.13194500 | 2.02610200  |
| C | -1.72549000 | 1.21050000  | 1.93723300  |
| C | -1.23536700 | -2.47266300 | 1.78723600  |
| C | -1.69770800 | -0.64965600 | 3.35875500  |
| C | -1.83811900 | 2.54993300  | 1.55722900  |
| C | -1.83935000 | 0.81787900  | 3.29985400  |
| C | -1.15669900 | -3.35637100 | 2.87657300  |
| H | -1.02154300 | -2.81674700 | 0.77963500  |
| C | -1.62683400 | -1.52952400 | 4.43860300  |
| C | -2.03823200 | 3.51294000  | 2.56021900  |
| H | -1.75751600 | 2.83355400  | 0.50947900  |
| C | -2.05293000 | 1.77662800  | 4.29055800  |
| C | -1.36657000 | -2.89172900 | 4.18413200  |
| H | -0.91252500 | -4.40219100 | 2.70413300  |
| H | -1.74292900 | -1.17535600 | 5.46160100  |
| C | -2.14590000 | 3.13065400  | 3.90737600  |
| H | -2.10877200 | 4.56341300  | 2.28691800  |
| H | -2.15635100 | 1.49411300  | 5.33704100  |
| H | -1.29971400 | -3.58814100 | 5.01839600  |
| H | -2.31231000 | 3.89045100  | 4.66936200  |

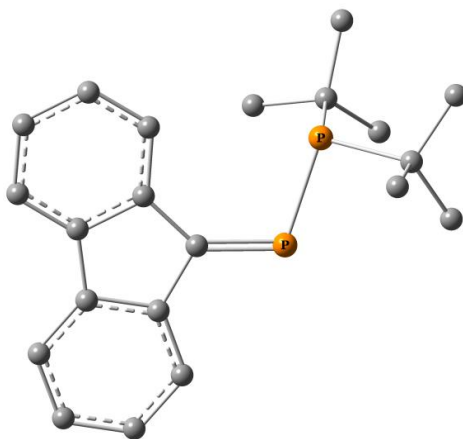

**Figure S174.** Optimized structure of **3b**.

Below are presented xyz coordinates for optimized geometry of **3b**:

|   |             |             |             |
|---|-------------|-------------|-------------|
| C | -3.03859900 | -1.40130600 | 0.00014300  |
| C | -3.47892000 | -0.06759300 | 0.00014400  |
| C | -2.54877700 | 0.98809300  | 0.00009200  |
| C | -1.19208700 | 0.67063400  | 0.00004000  |
| C | -0.74200500 | -0.67233700 | 0.00003900  |
| C | -1.66579600 | -1.71893900 | 0.00009100  |
| H | -3.77170900 | -2.20607400 | 0.00018400  |
| H | -4.54568100 | 0.14700900  | 0.00018500  |
| H | -2.86859300 | 2.02832000  | 0.00009200  |
| H | -1.34426100 | -2.75895100 | 0.00009100  |
| C | 0.00000000  | 1.58195900  | -0.00002000 |
| C | 1.19208700  | 0.67063400  | -0.00005800 |
| C | 2.54877700  | 0.98809300  | -0.00011800 |
| C | 3.47892000  | -0.06759300 | -0.00014200 |
| C | 3.03859900  | -1.40130600 | -0.00010700 |
| C | 1.66579600  | -1.71893900 | -0.00004600 |
| C | 0.74200500  | -0.67233700 | -0.00002200 |
| H | 2.86859300  | 2.02832000  | -0.00014500 |
| H | 4.54568100  | 0.14700900  | -0.00018900 |
| H | 3.77170900  | -2.20607400 | -0.00012600 |
| H | 1.34426100  | -2.75895100 | -0.00001900 |

O 0.0000000 2.81312500 -0.00003700

#### E.3.4. Reaction of **1** with 4-cyanobenzophenone leading to **Z-3c**

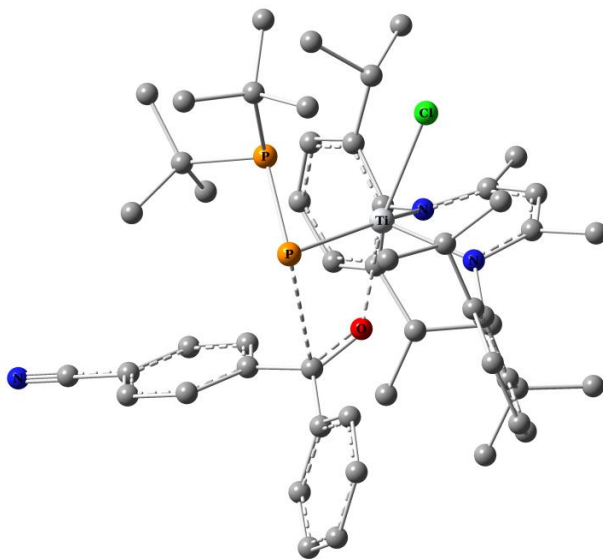

**Figure S175.** Optimized structure of **Z-3c<sub>1s1</sub>**.

Below are presented xyz coordinates for optimized geometry of **Z-3c<sub>1s1</sub>**:

|   |             |             |             |
|---|-------------|-------------|-------------|
| C | 3.31363500  | -0.43850500 | 0.25474400  |
| C | 3.96047400  | -0.86060700 | -0.93334400 |
| C | 5.17966500  | -0.24199200 | -1.27011700 |
| H | 5.71197900  | -0.57386700 | -2.16026500 |
| C | 5.72836100  | 0.77405700  | -0.48210300 |
| H | 6.67868000  | 1.22821300  | -0.75903500 |
| C | 5.04031800  | 1.21854100  | 0.65113200  |
| H | 5.45357900  | 2.03113100  | 1.24683700  |
| C | 3.82647900  | 0.62956500  | 1.03851800  |
| C | 3.41162500  | -1.96933400 | -1.82586200 |
| H | 2.37405800  | -2.16590400 | -1.52168200 |
| C | 3.39422700  | -1.53670700 | -3.30638600 |
| H | 3.00185300  | -2.35076100 | -3.92747900 |
| H | 2.75285700  | -0.65869200 | -3.45161400 |
| H | 4.40309500  | -1.30059400 | -3.67057000 |
| C | 4.20897900  | -3.28261000 | -1.66930400 |
| H | 3.77658000  | -4.06067600 | -2.31172300 |
| H | 5.25928500  | -3.13916100 | -1.95980000 |
| H | 4.18725200  | -3.64617800 | -0.63689000 |
| C | 3.12006700  | 1.10659200  | 2.30487100  |
| H | 2.11903300  | 0.66031100  | 2.30725300  |
| C | 2.95672100  | 2.63978600  | 2.32890400  |
| H | 2.38227700  | 2.93860400  | 3.21552100  |
| H | 3.92855100  | 3.14909000  | 2.38000200  |
| H | 2.43272400  | 2.99589300  | 1.43702600  |
| C | 3.86769600  | 0.63974300  | 3.57499300  |
| H | 3.92771700  | -0.45241400 | 3.63119900  |
| H | 4.89157600  | 1.03846600  | 3.58954200  |
| H | 3.34843100  | 0.99779000  | 4.47383100  |
| C | -1.78664800 | -0.53292600 | 2.40090700  |
| C | -1.86914800 | 0.76772100  | 2.97122500  |
| C | -3.14601500 | 1.27613500  | 3.27235300  |
| H | -3.23631400 | 2.27279200  | 3.69905400  |
| C | -4.30390200 | 0.52616700  | 3.03347600  |
| H | -5.28299300 | 0.94771000  | 3.25564800  |
| C | -4.19328900 | -0.77919800 | 2.54942400  |
| H | -5.09146400 | -1.38125500 | 2.41658900  |
| C | -2.94089500 | -1.34733700 | 2.25378000  |



|    |             |             |             |
|----|-------------|-------------|-------------|
| C  | -0.60861600 | 1.57443000  | 3.29888400  |
| H  | 0.08097000  | 1.44799100  | 2.45332700  |
| C  | -0.86770200 | 3.08239200  | 3.49811500  |
| H  | 0.09304900  | 3.60583700  | 3.57625400  |
| H  | -1.42692300 | 3.53248200  | 2.66970100  |
| H  | -1.42126500 | 3.27339600  | 4.42806500  |
| C  | 0.09835100  | 1.03775000  | 4.56766300  |
| H  | 0.91901400  | 1.71220500  | 4.84552100  |
| H  | -0.60362700 | 0.98869100  | 5.41085900  |
| H  | 0.52773400  | 0.04496500  | 4.40977000  |
| C  | -2.86382200 | -2.83743400 | 1.91488400  |
| H  | -1.80773600 | -3.11961200 | 1.84057200  |
| C  | -3.50830900 | -3.19895900 | 0.56498900  |
| H  | -3.49380900 | -4.28747200 | 0.42427300  |
| H  | -4.55280100 | -2.85948900 | 0.51718600  |
| H  | -2.94166000 | -2.74676100 | -0.25646200 |
| C  | -3.52695700 | -3.67565900 | 3.03613500  |
| H  | -3.31113900 | -4.74092500 | 2.88019000  |
| H  | -3.17193700 | -3.38961300 | 4.03320700  |
| H  | -4.61821000 | -3.55118400 | 3.02415400  |
| C  | 3.79974100  | -2.57562900 | 2.00477600  |
| H  | 3.95413500  | -2.85823200 | 3.05094200  |
| H  | 3.86630300  | -3.48774100 | 1.39524600  |
| H  | 4.60136300  | -1.90297400 | 1.68949200  |
| C  | 2.41856600  | -1.97854100 | 1.80584000  |
| C  | 1.44109500  | -2.34807500 | 2.73293100  |
| H  | 1.76503300  | -3.04459300 | 3.50275500  |
| C  | 0.12953600  | -1.84864000 | 2.89899700  |
| C  | -0.54155300 | -2.28553900 | 4.19245100  |
| H  | 0.18806400  | -2.29399200 | 5.00946800  |
| H  | -1.38112000 | -1.64358400 | 4.46813500  |
| H  | -0.91468900 | -3.31101700 | 4.07023100  |
| C  | 0.35666600  | 2.13140500  | -0.49768300 |
| C  | -1.28459200 | -2.94836200 | -3.31286700 |
| C  | -1.71922100 | -2.48124900 | -4.71816300 |
| H  | -2.78479400 | -2.24297700 | -4.78648500 |
| H  | -1.14230200 | -1.59983100 | -5.02651800 |
| H  | -1.51473500 | -3.29049600 | -5.43627800 |
| C  | 0.20450400  | -3.33276600 | -3.41517500 |
| H  | 0.61524500  | -3.64913900 | -2.45310200 |
| H  | 0.29931700  | -4.16418400 | -4.13089300 |
| H  | 0.79112300  | -2.48603400 | -3.78740000 |
| C  | -3.12448800 | -0.59551500 | -2.31843200 |
| C  | -3.39164300 | 0.08569200  | -0.96562200 |
| H  | -2.48578200 | 0.57837800  | -0.59739000 |
| H  | -4.17420300 | 0.85098700  | -1.07290400 |
| H  | -3.71229400 | -0.63385500 | -0.20803800 |
| C  | -4.32699400 | -1.51026600 | -2.63195000 |
| H  | -4.26334100 | -1.98214200 | -3.61746100 |
| H  | -4.45178300 | -2.29389700 | -1.87702800 |
| H  | -5.23744700 | -0.89145200 | -2.62163500 |
| Cl | 0.28665700  | -3.42379200 | 0.02113100  |
| N  | 2.16253400  | -1.14109000 | 0.76642700  |
| N  | -0.49789100 | -1.05463600 | 2.01092300  |
| O  | 0.51606900  | 1.15447400  | 0.30121000  |
| P  | 0.14369300  | -0.16820600 | -2.20417600 |
| P  | -1.46852600 | -1.54077400 | -2.01346300 |
| Ti | 0.25696400  | -1.06543400 | -0.00981600 |
| C  | -2.96951700 | 0.47758000  | -3.41415900 |
| H  | -2.77957400 | 0.03625200  | -4.39850800 |
| H  | -3.89476700 | 1.07185600  | -3.47399000 |
| H  | -2.13745200 | 1.15101200  | -3.17555300 |
| C  | -2.09861500 | -4.17300300 | -2.84254900 |
| H  | -1.74459700 | -4.51227600 | -1.86214900 |
| H  | -3.17079100 | -3.95787400 | -2.77225900 |
| H  | -1.96808000 | -4.99511100 | -3.56315600 |
| C  | -0.96913400 | 2.74630400  | -0.75109700 |
| C  | -1.21763600 | 3.48811100  | -1.93062600 |

|   |             |            |             |
|---|-------------|------------|-------------|
| C | -1.97617300 | 2.66136300 | 0.22706600  |
| C | -2.43888900 | 4.12770800 | -2.11893800 |
| H | -0.46032400 | 3.52324600 | -2.70966400 |
| C | -3.19131200 | 3.32351100 | 0.06645100  |
| H | -1.80074900 | 2.05651000 | 1.10851900  |
| C | -3.43171700 | 4.06392200 | -1.11013100 |
| H | -2.63996600 | 4.67603500 | -3.03562600 |
| H | -3.95780800 | 3.25324900 | 0.83415900  |
| C | 1.52943900  | 2.86507100 | -1.04960100 |
| C | 1.56915400  | 4.27579100 | -0.96075500 |
| C | 2.60594800  | 2.17968600 | -1.64048700 |
| C | 2.67799800  | 4.98118100 | -1.43951800 |
| H | 0.74524500  | 4.81016100 | -0.49170400 |
| C | 3.68939000  | 2.89199200 | -2.16088200 |
| H | 2.56583900  | 1.09881000 | -1.72105100 |
| C | 3.73458100  | 4.29017700 | -2.05248100 |
| H | 2.71213200  | 6.06484600 | -1.34446700 |
| H | 4.50035800  | 2.35065400 | -2.64118400 |
| C | -4.68444600 | 4.73277900 | -1.29369500 |
| N | -5.71327800 | 5.27912000 | -1.44400600 |
| H | 4.58812800  | 4.83978800 | -2.44582700 |

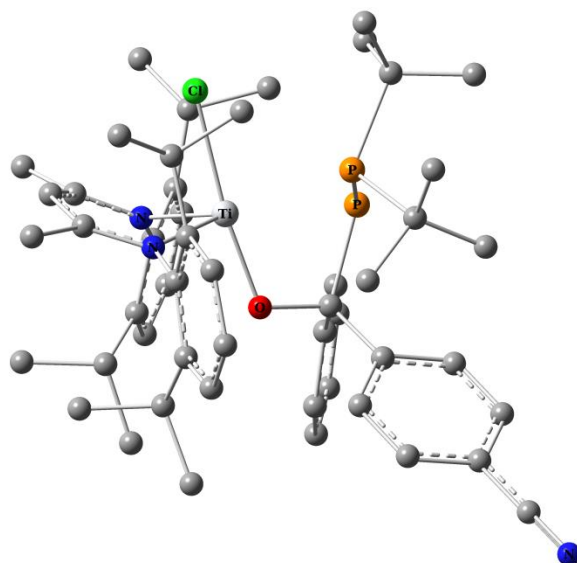

**Figure S176.** Optimized structure of **Z-3cr**.

Below are presented xyz coordinates for optimized geometry of **Z-3cr**:

|   |             |             |             |
|---|-------------|-------------|-------------|
| C | -3.26556000 | -0.60207100 | -0.19214300 |
| C | -4.02042900 | -0.55799300 | 1.00421900  |
| C | -5.15038000 | 0.27937900  | 1.03397100  |
| H | -5.74961700 | 0.32739000  | 1.94236600  |
| C | -5.51501300 | 1.04663600  | -0.07355500 |
| H | -6.38579700 | 1.69814600  | -0.02369300 |
| C | -4.75745000 | 0.98267100  | -1.24863700 |
| H | -5.05113300 | 1.58158700  | -2.10803500 |
| C | -3.62963900 | 0.15401500  | -1.33758100 |
| C | -3.70069700 | -1.42377300 | 2.21895400  |
| H | -2.85145200 | -2.07033400 | 1.96464200  |
| C | -3.28798000 | -0.56639900 | 3.43339400  |
| H | -3.07785000 | -1.21069100 | 4.29708300  |
| H | -2.38344200 | 0.01031900  | 3.21152500  |
| H | -4.09204300 | 0.12920200  | 3.71256900  |
| C | -4.90075500 | -2.31929100 | 2.60731500  |
| H | -4.60049400 | -3.02478300 | 3.39318700  |
| H | -5.73118800 | -1.71605000 | 2.99873300  |
| H | -5.28157900 | -2.89216300 | 1.75348700  |

|   |             |             |             |
|---|-------------|-------------|-------------|
| C | -2.88465600 | -0.02119100 | -2.65827800 |
| H | -1.87376400 | -0.37006100 | -2.41486300 |
| C | -2.76197000 | 1.27728300  | -3.47461400 |
| H | -2.15269200 | 1.09444900  | -4.36894400 |
| H | -3.74196100 | 1.63661500  | -3.81718800 |
| H | -2.29165300 | 2.06955400  | -2.88769700 |
| C | -3.57583200 | -1.10338300 | -3.52312600 |
| H | -3.59553800 | -2.07699800 | -3.02275100 |
| H | -4.61174900 | -0.81079300 | -3.74303300 |
| H | -3.04210000 | -1.22431300 | -4.47518900 |
| C | 1.89968500  | -1.76537400 | -1.79641700 |
| C | 2.08237500  | -0.78189500 | -2.80446100 |
| C | 3.39256400  | -0.52802200 | -3.24668000 |
| H | 3.56133200  | 0.22963100  | -4.00806100 |
| C | 4.48461800  | -1.24643400 | -2.74687900 |
| H | 5.49027900  | -1.02853400 | -3.10230900 |
| C | 4.27320100  | -2.25820900 | -1.80838900 |
| H | 5.11910200  | -2.83896900 | -1.44307300 |
| C | 2.98576700  | -2.54506100 | -1.31953100 |
| C | 0.88815300  | -0.09835700 | -3.47256800 |
| H | 0.19853600  | 0.21777100  | -2.67801200 |
| C | 1.26873600  | 1.13767500  | -4.31260500 |
| H | 0.35650800  | 1.66856600  | -4.61095900 |
| H | 1.90573100  | 1.84444200  | -3.76843900 |
| H | 1.79809900  | 0.84671900  | -5.23068500 |
| C | 0.13964600  | -1.09100500 | -4.39679700 |
| H | -0.63299000 | -0.56022300 | -4.96779000 |
| H | 0.83657400  | -1.54913500 | -5.11141300 |
| H | -0.35482100 | -1.88537800 | -3.83090000 |
| C | 2.81447500  | -3.69906600 | -0.33376400 |
| H | 1.74384800  | -3.85461200 | -0.15786400 |
| C | 3.43924200  | -3.36140200 | 1.03043700  |
| H | 3.28455900  | -4.18525800 | 1.73874500  |
| H | 4.51986500  | -3.18487200 | 0.93391600  |
| H | 2.96559500  | -2.46388500 | 1.44051400  |
| C | 3.43022800  | -5.01032700 | -0.87585700 |
| H | 3.15949500  | -5.84774800 | -0.21935200 |
| H | 3.09046600  | -5.24071000 | -1.89235300 |
| H | 4.52653600  | -4.94874000 | -0.89897300 |
| C | -3.75629000 | -3.34356300 | -0.70821500 |
| H | -3.86523500 | -4.16746400 | -1.42008400 |
| H | -3.90593800 | -3.74172600 | 0.30453500  |
| H | -4.53589300 | -2.59761000 | -0.89050000 |
| C | -2.36820800 | -2.74572200 | -0.78491000 |
| C | -1.35769800 | -3.52105900 | -1.35720800 |
| H | -1.66044400 | -4.50299900 | -1.71285200 |
| C | -0.04543500 | -3.13431600 | -1.71929900 |
| C | 0.61951300  | -4.08824100 | -2.70154400 |
| H | -0.09779400 | -4.35996300 | -3.48429400 |
| H | 1.51078100  | -3.66298600 | -3.16643400 |
| H | 0.90302700  | -5.01066500 | -2.17890900 |
| C | -0.29272600 | 1.82953700  | 0.38230100  |
| C | 1.63575100  | -0.74684600 | 3.94512500  |
| C | 2.22095800  | 0.36374300  | 4.84395100  |
| H | 3.29132000  | 0.52723800  | 4.69314800  |
| H | 1.69036800  | 1.31122400  | 4.68684100  |
| H | 2.07838500  | 0.06446800  | 5.89333000  |
| C | 0.19011500  | -0.97788400 | 4.44355300  |
| H | -0.36445700 | -1.68149500 | 3.82038800  |
| H | 0.26034100  | -1.39393100 | 5.46043300  |
| H | -0.36839100 | -0.03726100 | 4.50682300  |
| C | 3.38683700  | 0.67570100  | 1.76284200  |
| C | 3.54933700  | 0.61032000  | 0.23059200  |
| H | 2.64286400  | 0.91577700  | -0.29327000 |
| H | 4.36564000  | 1.27608200  | -0.08533000 |
| H | 3.78785900  | -0.40834900 | -0.08655800 |
| C | 4.59091900  | -0.08293500 | 2.36801900  |
| H | 4.62376200  | -0.04529100 | 3.46119400  |

|    |             |             |             |
|----|-------------|-------------|-------------|
| H  | 4.62077700  | -1.12932000 | 2.04902700  |
| H  | 5.50476600  | 0.40320000  | 1.99377300  |
| Cl | -0.32085500 | -2.86562100 | 1.68842600  |
| N  | -2.13254400 | -1.49363500 | -0.32598100 |
| N  | 0.56925700  | -2.01685400 | -1.28561400 |
| O  | -0.27546800 | 0.72721400  | -0.54636000 |
| P  | -0.13373500 | 0.98278200  | 2.10991600  |
| P  | 1.71106600  | -0.23381900 | 2.06432100  |
| Ti | -0.30072400 | -0.93291500 | 0.33687900  |
| C  | 3.40803800  | 2.13375600  | 2.25452100  |
| H  | 3.38505800  | 2.20261100  | 3.34608100  |
| H  | 4.33615500  | 2.61050000  | 1.90365900  |
| H  | 2.56620800  | 2.70328500  | 1.85893600  |
| C  | 2.41275300  | -2.06969500 | 4.11829300  |
| H  | 1.92694200  | -2.87434800 | 3.55616200  |
| H  | 3.45632100  | -1.99458300 | 3.79658400  |
| H  | 2.40847000  | -2.34164200 | 5.18466800  |
| C  | 0.75958800  | 2.87055800  | 0.04693400  |
| C  | 0.87548700  | 4.02204600  | 0.85365200  |
| C  | 1.53865900  | 2.76863900  | -1.11182800 |
| C  | 1.77633900  | 5.03181000  | 0.52723900  |
| H  | 0.25118900  | 4.11525700  | 1.74093300  |
| C  | 2.45331600  | 3.76967400  | -1.45093600 |
| H  | 1.41856300  | 1.89169300  | -1.73821100 |
| C  | 2.58349600  | 4.90788400  | -0.62963500 |
| H  | 1.86904600  | 5.91511500  | 1.15421800  |
| H  | 3.06499800  | 3.67908200  | -2.34578500 |
| C  | -1.64374700 | 2.58125500  | 0.29978500  |
| C  | -1.87170000 | 3.40292100  | -0.82265600 |
| C  | -2.59579400 | 2.57806100  | 1.32907100  |
| C  | -3.01401000 | 4.20354300  | -0.91011100 |
| H  | -1.12631700 | 3.44037800  | -1.61465200 |
| C  | -3.73571100 | 3.39239500  | 1.25171000  |
| H  | -2.44431800 | 1.95534100  | 2.20710400  |
| C  | -3.94765000 | 4.21114200  | 0.13737000  |
| H  | -3.16519700 | 4.83348800  | -1.78537000 |
| H  | -4.45645500 | 3.37821600  | 2.06723800  |
| C  | 3.52434500  | 5.93436600  | -0.96559900 |
| N  | 4.29867000  | 6.77385000  | -1.24047800 |
| H  | -4.82935600 | 4.84756000  | 0.08272000  |

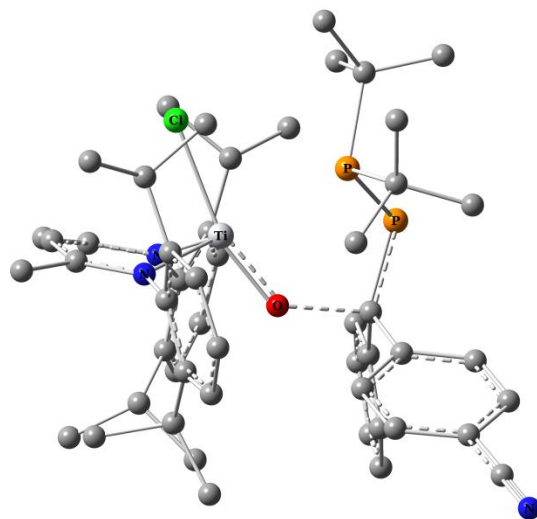

**Figure S177.** Optimized structure of **Z-3cTs2**.

Below are presented xyz coordinates for optimized geometry of **Z-3cTs2**:

|   |             |             |             |
|---|-------------|-------------|-------------|
| C | -3.32126800 | -0.20750500 | -0.19902100 |
| C | -3.94111500 | -0.12013000 | 1.07247400  |

|   |             |             |             |
|---|-------------|-------------|-------------|
| C | -5.10113700 | 0.66619400  | 1.18019900  |
| H | -5.61510200 | 0.72956100  | 2.13631700  |
| C | -5.60178000 | 1.38041900  | 0.08579500  |
| H | -6.50380300 | 1.98093700  | 0.19374300  |
| C | -4.91799100 | 1.35380600  | -1.13111900 |
| H | -5.27960700 | 1.95171900  | -1.96661800 |
| C | -3.77323900 | 0.55685500  | -1.30045400 |
| C | -3.38060800 | -0.86401400 | 2.28122500  |
| H | -2.28265400 | -0.83300200 | 2.18552500  |
| C | -3.74447600 | -0.18285300 | 3.61346100  |
| H | -3.23915700 | -0.69716900 | 4.43798100  |
| H | -3.43905300 | 0.87092300  | 3.62964400  |
| H | -4.82370800 | -0.23671000 | 3.81107500  |
| C | -3.80050800 | -2.34927000 | 2.32515000  |
| H | -3.41276600 | -2.81512800 | 3.24021800  |
| H | -4.89601900 | -2.44029900 | 2.32800000  |
| H | -3.39102500 | -2.90939600 | 1.47986400  |
| C | -3.05140100 | 0.55201200  | -2.64397500 |
| H | -2.23646800 | -0.17949900 | -2.58800100 |
| C | -2.42606300 | 1.93856200  | -2.90407400 |
| H | -1.93684800 | 1.95676700  | -3.88676400 |
| H | -3.19301000 | 2.72401500  | -2.89311600 |
| H | -1.68689100 | 2.17926200  | -2.13449600 |
| C | -3.97680300 | 0.15349900  | -3.81416000 |
| H | -4.41806500 | -0.83985100 | -3.66738200 |
| H | -4.79743200 | 0.87305600  | -3.93514300 |
| H | -3.40789800 | 0.13441100  | -4.75290500 |
| C | 1.54914400  | -1.74568400 | -2.06968800 |
| C | 1.79266800  | -0.65439600 | -2.94954900 |
| C | 3.12360100  | -0.39208400 | -3.31177500 |
| H | 3.34327800  | 0.43992200  | -3.97627400 |
| C | 4.17680700  | -1.19036500 | -2.84649800 |
| H | 5.20121900  | -0.95928100 | -3.13345800 |
| C | 3.90779900  | -2.29218100 | -2.03406100 |
| H | 4.72700900  | -2.92507900 | -1.69613300 |
| C | 2.59472600  | -2.59957200 | -1.63148100 |
| C | 0.63740000  | 0.15729400  | -3.53646400 |
| H | -0.03566300 | 0.41254100  | -2.70496900 |
| C | 1.08352000  | 1.46028900  | -4.22715400 |
| H | 0.19889700  | 2.03144500  | -4.53122100 |
| H | 1.68200300  | 2.10349100  | -3.57399300 |
| H | 1.66664200  | 1.25033300  | -5.13451200 |
| C | -0.16307700 | -0.68144400 | -4.56321200 |
| H | -0.93840500 | -0.05778600 | -5.02672400 |
| H | 0.50023500  | -1.04840500 | -5.35783600 |
| H | -0.66084100 | -1.53762900 | -4.09980300 |
| C | 2.34889500  | -3.84806100 | -0.78582100 |
| H | 1.26823100  | -3.98685600 | -0.67312700 |
| C | 2.91579900  | -3.70151500 | 0.63897800  |
| H | 2.73641200  | -4.62012200 | 1.21187900  |
| H | 3.99759500  | -3.50978500 | 0.61645400  |
| H | 2.41723700  | -2.88070800 | 1.16594500  |
| C | 2.94265100  | -5.10532100 | -1.46278600 |
| H | 2.63269800  | -6.00426900 | -0.91414300 |
| H | 2.61567100  | -5.20289100 | -2.50517400 |
| H | 4.04040300  | -5.07567800 | -1.45984400 |
| C | -4.21426400 | -2.60886700 | -1.15265300 |
| H | -4.67099200 | -2.03878900 | -1.97099200 |
| H | -4.36461000 | -3.67477700 | -1.35257300 |
| H | -4.74038100 | -2.32959000 | -0.23595300 |
| C | -2.72720900 | -2.31174100 | -1.06135400 |
| C | -1.87641400 | -3.19329800 | -1.75354300 |
| H | -2.35489500 | -4.06487900 | -2.19294000 |
| C | -0.53448700 | -2.98938800 | -2.11619700 |
| C | 0.04411400  | -3.93061500 | -3.15441400 |
| H | -0.71104700 | -4.16321500 | -3.91293400 |
| H | 0.92592900  | -3.50503200 | -3.64107300 |
| H | 0.33781000  | -4.87297700 | -2.67385500 |

|    |             |             |             |
|----|-------------|-------------|-------------|
| C  | 0.11037600  | 2.12340500  | 0.88877600  |
| C  | 0.98259900  | -1.17573700 | 4.07980100  |
| C  | 1.58226400  | -0.31569200 | 5.21472700  |
| H  | 2.67506400  | -0.26650700 | 5.17681400  |
| H  | 1.18738900  | 0.70796800  | 5.18829000  |
| H  | 1.30448400  | -0.76605100 | 6.17997300  |
| C  | -0.53903700 | -1.26453500 | 4.31519500  |
| H  | -1.02117500 | -1.87677700 | 3.54686700  |
| H  | -0.70719100 | -1.74353600 | 5.29206400  |
| H  | -1.00250000 | -0.27331900 | 4.33091000  |
| C  | 3.22195100  | -0.03258600 | 2.23182900  |
| C  | 3.55278000  | -0.06155700 | 0.72752100  |
| H  | 2.86686900  | 0.54815400  | 0.13927900  |
| H  | 4.57072300  | 0.32305400  | 0.56391800  |
| H  | 3.51014900  | -1.08238600 | 0.33904500  |
| C  | 4.12676600  | -1.08517500 | 2.90812500  |
| H  | 4.05307000  | -1.07320800 | 4.00015300  |
| H  | 3.93448000  | -2.09987200 | 2.54906100  |
| H  | 5.16673200  | -0.83437100 | 2.64719400  |
| Cl | -0.49426800 | -3.12431100 | 1.28293700  |
| N  | -2.28811200 | -1.19563000 | -0.43027500 |
| N  | 0.20144800  | -1.98090800 | -1.60531500 |
| O  | -0.07919000 | 0.62313100  | -0.20567800 |
| P  | 0.07195300  | 1.42644600  | 2.58179600  |
| P  | 1.30243200  | -0.37592300 | 2.35141400  |
| Ti | -0.31018600 | -1.06132100 | 0.12989600  |
| C  | 3.55580300  | 1.34310600  | 2.83871300  |
| H  | 3.35660500  | 1.37122100  | 3.91551300  |
| H  | 4.62566600  | 1.54960200  | 2.67945000  |
| H  | 2.97950600  | 2.14302800  | 2.37089100  |
| C  | 1.53751700  | -2.61826400 | 4.14026600  |
| H  | 1.14097500  | -3.22443600 | 3.31959100  |
| H  | 2.62836900  | -2.65857900 | 4.12169900  |
| H  | 1.20640000  | -3.06935000 | 5.08805500  |
| C  | 1.38289600  | 2.71682700  | 0.33368700  |
| C  | 1.94998700  | 3.80036900  | 1.04283300  |
| C  | 1.97223300  | 2.33080600  | -0.88000000 |
| C  | 3.08560300  | 4.45641100  | 0.57079400  |
| H  | 1.48694700  | 4.11606000  | 1.97574000  |
| C  | 3.12116500  | 2.96666800  | -1.35725200 |
| H  | 1.53263400  | 1.50497800  | -1.42686900 |
| C  | 3.69018500  | 4.03484200  | -0.63539400 |
| H  | 3.51530700  | 5.28426700  | 1.12933600  |
| H  | 3.58693800  | 2.63366200  | -2.28168000 |
| C  | -1.07686900 | 2.99229700  | 0.56996800  |
| C  | -0.98060000 | 4.04255200  | -0.37289800 |
| C  | -2.31138500 | 2.79899500  | 1.22482700  |
| C  | -2.07105600 | 4.88079100  | -0.62958800 |
| H  | -0.04686900 | 4.21215400  | -0.90226700 |
| C  | -3.38990800 | 3.65447900  | 0.99040400  |
| H  | -2.40471000 | 1.97673600  | 1.92890300  |
| C  | -3.27784900 | 4.69807900  | 0.05962300  |
| H  | -1.97246900 | 5.68080500  | -1.36152300 |
| H  | -4.32362900 | 3.49475000  | 1.52341300  |
| C  | 4.87208900  | 4.68295600  | -1.12082000 |
| N  | 5.84189900  | 5.21034100  | -1.52200200 |
| H  | -4.12371800 | 5.35723800  | -0.12951900 |

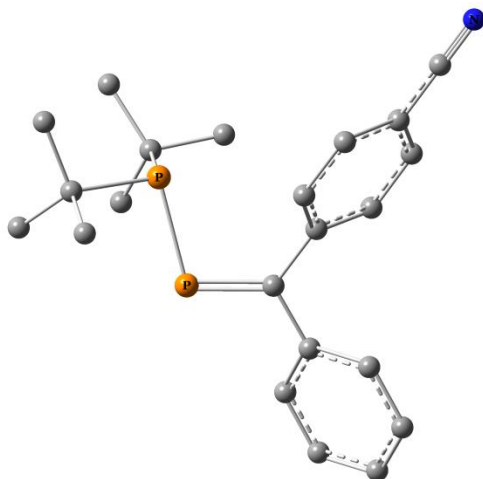

**Figure S178.** Optimized structure of **Z-3c**.

Below are presented xyz coordinates for optimized geometry of **Z-3c**:

|   |             |             |             |
|---|-------------|-------------|-------------|
| C | -1.16907500 | 2.86625900  | -1.19620800 |
| C | -0.87147800 | 1.50476900  | -1.23062900 |
| C | -1.33606800 | 0.63571500  | -0.22078100 |
| C | -2.12501000 | 1.16942200  | 0.82244800  |
| C | -2.40868900 | 2.53333100  | 0.88297400  |
| C | -1.93043300 | 3.39344100  | -0.13001700 |
| H | -0.81524300 | 3.52819800  | -1.98236500 |
| H | -2.99995300 | 2.93987800  | 1.69957800  |
| C | -1.02329300 | -0.81541300 | -0.23887500 |
| P | 0.54433700  | -1.52616900 | -0.37603200 |
| P | 1.93778600  | 0.21044900  | -0.15787600 |
| C | 2.36746000  | 0.02162700  | 1.71527200  |
| C | 1.18526100  | 0.72047800  | 2.42730200  |
| C | 2.49131700  | -1.41237000 | 2.26642000  |
| C | 3.66340800  | 0.80568800  | 2.00388700  |
| H | 1.05661300  | 1.75301200  | 2.07979500  |
| H | 0.24512600  | 0.18131500  | 2.25387000  |
| H | 1.37031100  | 0.73660300  | 3.51201900  |
| H | 3.31056900  | -1.96980200 | 1.80247100  |
| H | 2.68307700  | -1.36586600 | 3.34971200  |
| H | 1.56402600  | -1.98063300 | 2.11502100  |
| H | 3.79179800  | 0.90338700  | 3.09259700  |
| H | 4.54610900  | 0.28616900  | 1.61209000  |
| H | 3.63142500  | 1.81554600  | 1.57408200  |
| C | 3.37202600  | -0.45877100 | -1.24765000 |
| C | 4.43014700  | 0.66234700  | -1.37050600 |
| C | 4.04092900  | -1.76598800 | -0.78669300 |
| C | 2.74357200  | -0.66914000 | -2.64617700 |
| H | 3.97323500  | 1.60149500  | -1.70775300 |
| H | 4.94391800  | 0.85348500  | -0.42247100 |
| H | 5.18999600  | 0.36513300  | -2.10918800 |
| H | 3.30730200  | -2.56976600 | -0.64507300 |
| H | 4.76389500  | -2.09702200 | -1.54837600 |
| H | 4.59168600  | -1.62658200 | 0.15103300  |
| H | 3.53718500  | -0.90295400 | -3.37141000 |
| H | 2.02664100  | -1.50163100 | -2.65047200 |
| H | 2.22390400  | 0.23542300  | -2.99124200 |
| H | -0.28633300 | 1.09662500  | -2.04999500 |
| H | -2.50020500 | 0.50446400  | 1.59763600  |
| C | -2.18671100 | -1.72921400 | -0.13273600 |
| C | -2.08460300 | -2.98683900 | 0.50770700  |
| C | -3.43251700 | -1.36500800 | -0.69890200 |
| C | -3.17772000 | -3.85692000 | 0.55597800  |
| H | -1.14461500 | -3.25922400 | 0.98414700  |
| C | -4.52366600 | -2.23774000 | -0.64945200 |
| H | -3.53015000 | -0.40218000 | -1.19618800 |

|   |             |             |             |
|---|-------------|-------------|-------------|
| C | -4.40147600 | -3.48767400 | -0.02326800 |
| H | -3.08058400 | -4.81598400 | 1.06149000  |
| H | -5.46932100 | -1.94326400 | -1.10090500 |
| C | -2.22712100 | 4.79432800  | -0.08197700 |
| N | -2.46932400 | 5.94256400  | -0.04193200 |
| H | -5.25453600 | -4.16193900 | 0.02334300  |

### E.3.5. Reaction of **1** with 4-cyanobenzophenone leading to **E-3c**

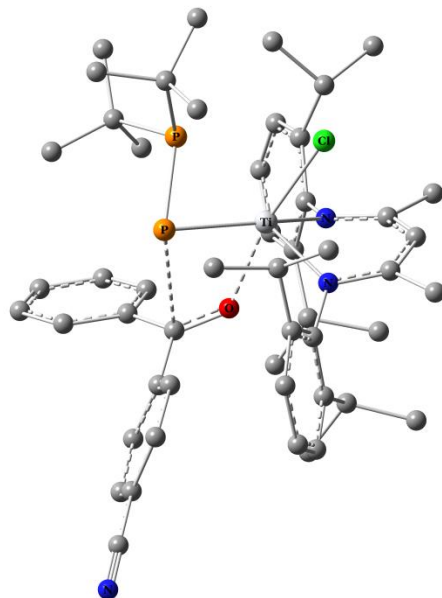

**Figure S179.** Optimized structure of **E-3c<sub>TS1</sub>**.

Below are presented xyz coordinates for optimized geometry of **E-3c<sub>TS1</sub>**:

|   |             |             |             |
|---|-------------|-------------|-------------|
| C | 2.40957400  | 1.23150400  | -1.45734300 |
| C | 2.98356800  | 2.36174600  | -0.82265200 |
| C | 4.38709700  | 2.41563300  | -0.72451600 |
| H | 4.85148800  | 3.29042500  | -0.27132600 |
| C | 5.19706900  | 1.38375800  | -1.20889800 |
| H | 6.28072100  | 1.45402200  | -1.12777600 |
| C | 4.60663300  | 0.25230000  | -1.78056300 |
| H | 5.23801500  | -0.56071900 | -2.13602100 |
| C | 3.21257900  | 0.15182100  | -1.91477400 |
| C | 2.15309100  | 3.52756600  | -0.29360100 |
| H | 1.09730500  | 3.22335500  | -0.29887800 |
| C | 2.53888400  | 3.87759300  | 1.15863800  |
| H | 1.94362700  | 4.73060800  | 1.50635100  |
| H | 2.34473900  | 3.03387800  | 1.83246200  |
| H | 3.59774300  | 4.15801000  | 1.23865300  |
| C | 2.29510700  | 4.78035500  | -1.18663500 |
| H | 1.66073900  | 5.58837500  | -0.79974800 |
| H | 3.33532700  | 5.13495400  | -1.19877600 |
| H | 1.99416600  | 4.57720700  | -2.21945000 |
| C | 2.59992900  | -1.06757800 | -2.59975000 |
| H | 1.51930600  | -1.03494300 | -2.41920400 |
| C | 3.13915400  | -2.39055200 | -2.02065400 |
| H | 2.63134100  | -3.23925200 | -2.49696500 |
| H | 4.21564800  | -2.50531900 | -2.20567700 |
| H | 2.97186900  | -2.44705700 | -0.94122300 |
| C | 2.84224400  | -1.03066200 | -4.12643300 |
| H | 2.39863300  | -0.14080500 | -4.58529000 |
| H | 3.91871100  | -1.02725900 | -4.34686700 |
| H | 2.39794900  | -1.91506600 | -4.60202300 |
| C | -2.45503300 | -1.41373300 | -1.57228200 |
| C | -2.02865800 | -2.77104500 | -1.56454100 |



|    |             |             |             |
|----|-------------|-------------|-------------|
| C  | -2.96464500 | -3.75425800 | -1.19522300 |
| H  | -2.65940000 | -4.79809900 | -1.17035200 |
| C  | -4.28122400 | -3.41801500 | -0.85863300 |
| H  | -4.98340300 | -4.19427200 | -0.55820200 |
| C  | -4.69923600 | -2.08881200 | -0.95154600 |
| H  | -5.73815400 | -1.83558300 | -0.74304300 |
| C  | -3.81217800 | -1.06747200 | -1.33686400 |
| C  | -0.61319400 | -3.16442700 | -1.99799900 |
| H  | 0.07259700  | -2.43313600 | -1.55004800 |
| C  | -0.19033200 | -4.57568900 | -1.53957600 |
| H  | 0.87534600  | -4.72028500 | -1.75585700 |
| H  | -0.33863300 | -4.73686400 | -0.46562700 |
| H  | -0.74282300 | -5.35489000 | -2.08328600 |
| C  | -0.44552000 | -3.08973300 | -3.53565000 |
| H  | 0.53079700  | -3.50363800 | -3.82063200 |
| H  | -1.22504500 | -3.67661400 | -4.03979000 |
| H  | -0.48644300 | -2.06142300 | -3.90436400 |
| C  | -4.36681800 | 0.33319000  | -1.60322300 |
| H  | -3.55836300 | 0.95384100  | -2.00516300 |
| C  | -4.87413500 | 1.04332300  | -0.33582900 |
| H  | -5.32996800 | 2.00546100  | -0.60296200 |
| H  | -5.62835800 | 0.43776600  | 0.18674700  |
| H  | -4.03735300 | 1.24466600  | 0.34213800  |
| C  | -5.51128500 | 0.26868500  | -2.64481100 |
| H  | -5.78273800 | 1.28448900  | -2.96134800 |
| H  | -5.23175200 | -0.31060800 | -3.53268900 |
| H  | -6.40772000 | -0.19687300 | -2.21325800 |
| C  | 1.57565200  | 2.30411300  | -3.91425600 |
| H  | 1.41012300  | 2.09194400  | -4.97525200 |
| H  | 1.31879400  | 3.35776100  | -3.73619000 |
| H  | 2.63534600  | 2.17337800  | -3.68034000 |
| C  | 0.67135900  | 1.44933900  | -3.04552700 |
| C  | -0.50354700 | 0.98331800  | -3.63954400 |
| H  | -0.66168200 | 1.29356800  | -4.66984800 |
| C  | -1.45505800 | 0.06059700  | -3.14606400 |
| C  | -2.45259500 | -0.41869300 | -4.18982700 |
| H  | -1.94963500 | -0.56447100 | -5.15201700 |
| H  | -2.95034000 | -1.34692700 | -3.90064900 |
| H  | -3.21805000 | 0.35631500  | -4.32956400 |
| C  | 1.07327600  | -1.46987400 | 1.15619700  |
| C  | -2.19944100 | 3.42839800  | 2.31087500  |
| C  | -2.12964600 | 3.57133800  | 3.84602600  |
| H  | -2.93028100 | 3.03910300  | 4.36814100  |
| H  | -1.16435800 | 3.20973800  | 4.22311300  |
| H  | -2.21828800 | 4.63806300  | 4.10406900  |
| C  | -1.07104400 | 4.30568200  | 1.73294100  |
| H  | -1.02532000 | 4.25273100  | 0.64242500  |
| H  | -1.25959100 | 5.34944800  | 2.02889000  |
| H  | -0.10164600 | 3.99938400  | 2.14068100  |
| C  | -2.85567700 | 0.41641300  | 2.95671200  |
| C  | -2.98642700 | -0.87389800 | 2.12927700  |
| H  | -2.02593600 | -1.13845600 | 1.67491700  |
| H  | -3.29427600 | -1.71005900 | 2.77382900  |
| H  | -3.71970400 | -0.76618800 | 1.32556800  |
| C  | -4.27805400 | 0.88816500  | 3.32494300  |
| H  | -4.28490400 | 1.76388100  | 3.98168100  |
| H  | -4.87634000 | 1.11436700  | 2.43575500  |
| H  | -4.78042100 | 0.06937900  | 3.86306400  |
| Cl | -1.57261700 | 2.75609700  | -1.28894500 |
| N  | 0.99848400  | 1.17859400  | -1.75358700 |
| N  | -1.50073600 | -0.37296000 | -1.87355400 |
| O  | 0.62289400  | -1.03440100 | 0.04855700  |
| P  | 0.16440600  | 1.16528500  | 1.86167200  |
| P  | -1.91321100 | 1.60479900  | 1.76239800  |
| Ti | -0.50882300 | 0.85238800  | -0.38998600 |
| C  | -2.03944500 | 0.12788300  | 4.23185000  |
| H  | -1.91667300 | 1.02144200  | 4.85347400  |
| H  | -2.55694300 | -0.64039100 | 4.82759700  |

|   |             |             |            |
|---|-------------|-------------|------------|
| H | -1.04252800 | -0.24787400 | 3.97153300 |
| C | -3.55672500 | 3.91104100  | 1.75584800 |
| H | -3.56743200 | 3.84135400  | 0.66196200 |
| H | -4.39801100 | 3.33106700  | 2.15173100 |
| H | -3.71197900 | 4.96362400  | 2.03891200 |
| C | 0.28940100  | -2.33505400 | 2.06187100 |
| C | 0.64850000  | -2.47614400 | 3.42362700 |
| C | -0.78871500 | -3.08501100 | 1.55648800 |
| C | -0.05652300 | -3.35496100 | 4.24761800 |
| H | 1.45208100  | -1.86710600 | 3.83140900 |
| C | -1.47245400 | -3.98813000 | 2.37489500 |
| H | -1.08647500 | -2.94213500 | 0.52415900 |
| C | -1.10818100 | -4.12724300 | 3.72151900 |
| H | 0.20973700  | -3.44007800 | 5.29931500 |
| H | -2.29719000 | -4.56556700 | 1.96133400 |
| H | -1.64574700 | -4.82233000 | 4.36413400 |
| C | 2.53596900  | -1.36166300 | 1.46273100 |
| C | 3.25023500  | -2.53736400 | 1.78622600 |
| C | 3.21848800  | -0.13561500 | 1.39754800 |
| C | 4.62571300  | -2.49252900 | 2.01458700 |
| H | 2.72743400  | -3.49013900 | 1.83208000 |
| C | 4.58269000  | -0.07102400 | 1.67335900 |
| H | 2.66733800  | 0.76840100  | 1.16374500 |
| C | 5.29809800  | -1.25201600 | 1.96696900 |
| H | 5.18053800  | -3.40062300 | 2.23612700 |
| H | 5.09865400  | 0.88350400  | 1.64905400 |
| C | 6.70930200  | -1.19011300 | 2.21150300 |
| N | 7.86631100  | -1.13669400 | 2.40381300 |

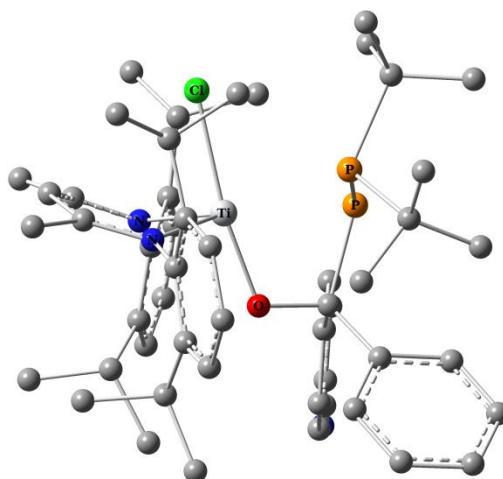

**Figure S180.** Optimized structure of *E*-3cr.

Below are presented xyz coordinates for optimized geometry of *E*-3cr:

|   |             |             |             |
|---|-------------|-------------|-------------|
| C | -2.37207300 | -1.92175500 | 0.21458300  |
| C | -3.10434100 | -1.98304900 | 1.42473900  |
| C | -4.49605500 | -1.79394500 | 1.35462800  |
| H | -5.08553600 | -1.84212700 | 2.26917200  |
| C | -5.13575700 | -1.54798300 | 0.13659600  |
| H | -6.21321900 | -1.39461000 | 0.10660300  |
| C | -4.39032500 | -1.49741200 | -1.04704000 |
| H | -4.89995000 | -1.32150200 | -1.99291000 |
| C | -3.00106400 | -1.69403400 | -1.03622300 |
| C | -2.44859800 | -2.30648800 | 2.76456600  |
| H | -1.41295000 | -2.61120300 | 2.57027400  |
| C | -2.38946800 | -1.06786300 | 3.68273600  |
| H | -1.94035400 | -1.33452600 | 4.64840600  |
| H | -1.77527300 | -0.27899600 | 3.23283000  |
| H | -3.39789600 | -0.67149500 | 3.86992200  |

|   |             |             |             |
|---|-------------|-------------|-------------|
| C | -3.17091000 | -3.46272100 | 3.49285400  |
| H | -2.58939900 | -3.76816800 | 4.37246900  |
| H | -4.16518200 | -3.15424700 | 3.84304800  |
| H | -3.30438800 | -4.33717000 | 2.84368900  |
| C | -2.21672400 | -1.81506600 | -2.34086100 |
| H | -1.15159100 | -1.76109600 | -2.08838000 |
| C | -2.51236900 | -0.69297500 | -3.35111100 |
| H | -1.99398200 | -0.89969100 | -4.29658100 |
| H | -3.58406800 | -0.60788400 | -3.57407600 |
| H | -2.15957900 | 0.26786600  | -2.96874500 |
| C | -2.48792900 | -3.19744700 | -2.98180300 |
| H | -2.22425500 | -4.01526500 | -2.30116100 |
| H | -3.55014900 | -3.30204900 | -3.24187600 |
| H | -1.89522900 | -3.31380600 | -3.89896600 |
| C | 2.82972400  | -1.02188900 | -1.48941900 |
| C | 2.60810300  | -0.38092400 | -2.73560500 |
| C | 3.69378600  | 0.27270700  | -3.34429400 |
| H | 3.54711100  | 0.78027700  | -4.29435300 |
| C | 4.96497800  | 0.27591700  | -2.75972000 |
| H | 5.78800900  | 0.79807400  | -3.24469100 |
| C | 5.17478000  | -0.41093100 | -1.56216100 |
| H | 6.17107400  | -0.43565100 | -1.12287100 |
| C | 4.12529300  | -1.08533300 | -0.91251900 |
| C | 1.25736000  | -0.47338000 | -3.44403300 |
| H | 0.47587600  | -0.28717900 | -2.69373400 |
| C | 1.09625800  | 0.54528000  | -4.59047100 |
| H | 0.05029900  | 0.56388800  | -4.92013700 |
| H | 1.37876800  | 1.56167400  | -4.29208000 |
| H | 1.71158500  | 0.26626600  | -5.45732600 |
| C | 1.03405100  | -1.89217000 | -4.02407000 |
| H | 0.11677700  | -1.90935800 | -4.62665000 |
| H | 1.87355700  | -2.17700500 | -4.67248700 |
| H | 0.92801100  | -2.64504700 | -3.23774100 |
| C | 4.43720900  | -1.88458800 | 0.35018300  |
| H | 3.54159900  | -2.44569100 | 0.64068900  |
| C | 4.76785900  | -0.95031700 | 1.52400200  |
| H | 4.94376800  | -1.52838500 | 2.44007900  |
| H | 5.66675100  | -0.35418100 | 1.31196300  |
| H | 3.92472900  | -0.27559300 | 1.69900400  |
| C | 5.60165300  | -2.87809800 | 0.12861400  |
| H | 5.69806700  | -3.53804100 | 1.00083100  |
| H | 5.45619800  | -3.49881700 | -0.76329200 |
| H | 6.55478600  | -2.34549800 | 0.00973000  |
| C | -1.56611000 | -4.61194500 | 0.35826000  |
| H | -1.21901100 | -5.55533200 | -0.07345400 |
| H | -1.65122700 | -4.73957700 | 1.44550700  |
| H | -2.56655300 | -4.38293200 | -0.02261700 |
| C | -0.58238200 | -3.49850000 | 0.06829500  |
| C | 0.69576200  | -3.85569100 | -0.36328500 |
| H | 0.88598900  | -4.92281800 | -0.44668600 |
| C | 1.70353800  | -3.02625900 | -0.90861800 |
| C | 2.77163700  | -3.80236700 | -1.66847600 |
| H | 2.28830600  | -4.56355600 | -2.29133600 |
| H | 3.39108100  | -3.16498600 | -2.30163600 |
| H | 3.42142400  | -4.32439200 | -0.95475500 |
| C | -0.96732600 | 1.66272900  | -0.10457900 |
| C | 2.00095500  | 1.43257700  | 3.65455600  |
| C | 2.00566500  | 2.90662500  | 4.11150800  |
| H | 2.88404400  | 3.46097100  | 3.76844300  |
| H | 1.10017900  | 3.42530500  | 3.77309200  |
| H | 2.01561600  | 2.92208600  | 5.21188900  |
| C | 0.83830900  | 0.74728900  | 4.41097900  |
| H | 0.68283900  | -0.28581900 | 4.09440100  |
| H | 1.10370900  | 0.74794900  | 5.47948800  |
| H | -0.10054400 | 1.30134700  | 4.30036500  |
| C | 2.82583800  | 2.73999400  | 0.91098100  |
| C | 2.90923400  | 2.32406100  | -0.57154800 |
| H | 1.92732100  | 2.09377900  | -0.98885800 |

|    |             |             |             |
|----|-------------|-------------|-------------|
| H  | 3.34061900  | 3.14671800  | -1.16046000 |
| H  | 3.54542600  | 1.44298100  | -0.68732600 |
| C  | 4.27246800  | 2.77331700  | 1.45410900  |
| H  | 4.33515200  | 3.11860900  | 2.49132000  |
| H  | 4.76048500  | 1.79646900  | 1.37541800  |
| H  | 4.84392800  | 3.48121200  | 0.83459900  |
| Cl | 1.16482300  | -1.92380000 | 2.34444100  |
| N  | -0.95334900 | -2.20341100 | 0.19388100  |
| N  | 1.72324300  | -1.68086400 | -0.82783300 |
| O  | -0.44048600 | 0.47067000  | -0.72823100 |
| P  | -0.38738600 | 1.50575200  | 1.72534400  |
| P  | 1.80878700  | 1.31270500  | 1.71030500  |
| Ti | 0.36515800  | -0.69396800 | 0.50992800  |
| C  | 2.19317300  | 4.13682300  | 1.04125400  |
| H  | 2.22064600  | 4.51360500  | 2.06735300  |
| H  | 2.76018500  | 4.83682100  | 0.40843300  |
| H  | 1.15699100  | 4.14099400  | 0.69898200  |
| C  | 3.30704500  | 0.72840600  | 4.07864400  |
| H  | 3.24636500  | -0.34585800 | 3.87610200  |
| H  | 4.19323200  | 1.13354900  | 3.57935500  |
| H  | 3.43927300  | 0.86689000  | 5.16241300  |
| C  | -0.57575200 | 2.92574200  | -0.85367800 |
| C  | -0.95198100 | 4.17977900  | -0.33503500 |
| C  | 0.01760900  | 2.86128000  | -2.11948500 |
| C  | -0.70795500 | 5.34868100  | -1.06243300 |
| H  | -1.43601100 | 4.22976400  | 0.64020400  |
| C  | 0.27139000  | 4.03327100  | -2.84822800 |
| H  | 0.27256200  | 1.88592500  | -2.51940900 |
| C  | -0.08798100 | 5.28068900  | -2.32212800 |
| H  | -0.99857100 | 6.31259900  | -0.64809800 |
| H  | 0.74210000  | 3.96756000  | -3.82833400 |
| H  | 0.10501000  | 6.19107800  | -2.88676600 |
| C  | -2.52005000 | 1.63967400  | -0.13528500 |
| C  | -3.17717500 | 2.00037400  | -1.33086600 |
| C  | -3.30440000 | 1.36679700  | 0.99584800  |
| C  | -4.56569600 | 2.07706900  | -1.40294500 |
| H  | -2.58947300 | 2.25682400  | -2.20800100 |
| C  | -4.69779600 | 1.46184600  | 0.94931400  |
| H  | -2.82909700 | 1.09093600  | 1.93267600  |
| C  | -5.34083100 | 1.81563200  | -0.25210400 |
| H  | -5.05578000 | 2.35198200  | -2.33383300 |
| H  | -5.28911700 | 1.25221000  | 1.83669400  |
| C  | -6.77039900 | 1.87441900  | -0.31140100 |
| N  | -7.94375400 | 1.90083900  | -0.36113100 |

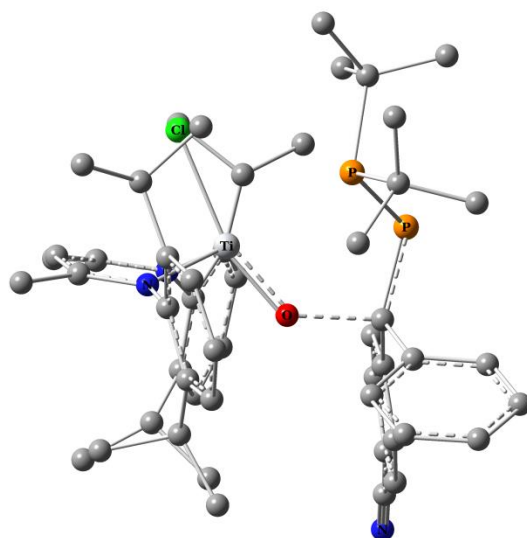

**Figure S181.** Optimized structure of *E*-3cfs2.

Below are presented xyz coordinates for optimized geometry of *E*-**3**crs<sub>2</sub>:

|   |             |             |             |
|---|-------------|-------------|-------------|
| C | -2.47922000 | -1.44405100 | 1.09442700  |
| C | -2.96876200 | -0.81328800 | 2.26586900  |
| C | -4.36006800 | -0.65437800 | 2.38830200  |
| H | -4.76758700 | -0.20165000 | 3.28914700  |
| C | -5.23272500 | -1.05198500 | 1.36841100  |
| H | -6.30674100 | -0.91496900 | 1.48338700  |
| C | -4.71799900 | -1.58320200 | 0.18409400  |
| H | -5.39601800 | -1.84353900 | -0.62749600 |
| C | -3.33821100 | -1.80094700 | 0.02799200  |
| C | -2.02305400 | -0.33727000 | 3.36530900  |
| H | -1.11920200 | 0.04084300  | 2.85929600  |
| C | -2.60916600 | 0.82641200  | 4.18611400  |
| H | -1.85445500 | 1.19516400  | 4.88905100  |
| H | -2.91792800 | 1.66357600  | 3.54747100  |
| H | -3.47526200 | 0.50365100  | 4.77957700  |
| C | -1.58228800 | -1.47134900 | 4.31613600  |
| H | -0.94883200 | -1.05960900 | 5.11228900  |
| H | -2.45792500 | -1.94607000 | 4.78112400  |
| H | -0.99186800 | -2.22935700 | 3.79395200  |
| C | -2.81434600 | -2.39943200 | -1.27371600 |
| H | -1.73485700 | -2.55774500 | -1.16416400 |
| C | -3.03132500 | -1.40403900 | -2.43234400 |
| H | -2.70077600 | -1.84656000 | -3.38103800 |
| H | -4.09319900 | -1.14401000 | -2.53285400 |
| H | -2.47054500 | -0.48118500 | -2.25768800 |
| C | -3.46978100 | -3.75717700 | -1.60815700 |
| H | -3.32084000 | -4.49255700 | -0.80826300 |
| H | -4.55034300 | -3.64808000 | -1.76921700 |
| H | -3.03396000 | -4.16698400 | -2.52873900 |
| C | 2.33423000  | -1.82405200 | -1.40807000 |
| C | 1.90252700  | -1.55543500 | -2.73652900 |
| C | 2.86282400  | -1.10611300 | -3.65674200 |
| H | 2.56159300  | -0.88145900 | -4.67685800 |
| C | 4.20622500  | -0.95104400 | -3.29089000 |
| H | 4.92974300  | -0.59049400 | -4.02018600 |
| C | 4.61802700  | -1.27904400 | -1.99883100 |
| H | 5.66789300  | -1.18131000 | -1.72661400 |
| C | 3.69912100  | -1.72672900 | -1.03151700 |
| C | 0.45806700  | -1.81798400 | -3.16251600 |
| H | -0.19231700 | -1.37746400 | -2.39302700 |
| C | 0.09293400  | -1.20256900 | -4.52680100 |
| H | -0.97687800 | -1.34748600 | -4.71600500 |
| H | 0.29400100  | -0.12750900 | -4.57300300 |
| H | 0.63972200  | -1.69404300 | -5.34363200 |
| C | 0.16817100  | -3.33808400 | -3.22540700 |
| H | -0.84948300 | -3.50643900 | -3.60086600 |
| H | 0.87068200  | -3.83363300 | -3.90884400 |
| H | 0.24136000  | -3.81419300 | -2.24374700 |
| C | 4.20891700  | -2.12337000 | 0.35290100  |
| H | 3.37919800  | -2.56006700 | 0.91902200  |
| C | 4.68767700  | -0.90277600 | 1.16101800  |
| H | 5.05745200  | -1.22222400 | 2.14358000  |
| H | 5.49693200  | -0.37537500 | 0.63715200  |
| H | 3.85747500  | -0.20796100 | 1.32981500  |
| C | 5.34336700  | -3.16922400 | 0.25260800  |
| H | 5.59408800  | -3.54245700 | 1.25412400  |
| H | 5.06002100  | -4.02191400 | -0.37648300 |
| H | 6.25333800  | -2.72771400 | -0.17512400 |
| C | -2.01184600 | -4.00539500 | 1.93139400  |
| H | -2.74379000 | -4.32848300 | 1.18102800  |
| H | -1.57979300 | -4.89892200 | 2.39375600  |
| H | -2.55743100 | -3.43004100 | 2.68380900  |
| C | -0.91048500 | -3.18455900 | 1.28269400  |
| C | 0.23383800  | -3.89593900 | 0.87714300  |
| H | 0.26677600  | -4.94320400 | 1.16670100  |
| C | 1.23520100  | -3.48045000 | -0.01635300 |

|    |             |             |             |
|----|-------------|-------------|-------------|
| C  | 2.16089400  | -4.55406800 | -0.55407800 |
| H  | 1.60121800  | -5.47897200 | -0.73013300 |
| H  | 2.64628300  | -4.24290900 | -1.48309100 |
| H  | 2.94223900  | -4.77073800 | 0.18609600  |
| C  | -0.72087900 | 2.12880000  | -0.53593300 |
| C  | 1.96586000  | 2.23585600  | 3.27314300  |
| C  | 2.09208400  | 3.75992500  | 3.49279400  |
| H  | 2.98750300  | 4.18262400  | 3.02627000  |
| H  | 1.21413900  | 4.29110900  | 3.10343400  |
| H  | 2.15879600  | 3.95391700  | 4.57427100  |
| C  | 0.74152100  | 1.74792600  | 4.07509600  |
| H  | 0.60188000  | 0.66844700  | 3.96236400  |
| H  | 0.92222700  | 1.96196800  | 5.13976200  |
| H  | -0.17345900 | 2.26406400  | 3.76858000  |
| C  | 3.12604700  | 2.70043400  | 0.41132200  |
| C  | 3.31911000  | 1.86789200  | -0.86969100 |
| H  | 2.38137200  | 1.70191300  | -1.40021100 |
| H  | 4.00166400  | 2.39650000  | -1.55226000 |
| H  | 3.75721500  | 0.89250200  | -0.64147200 |
| C  | 4.49269600  | 2.74900600  | 1.12792000  |
| H  | 4.49454500  | 3.41037200  | 2.00011800  |
| H  | 4.84632500  | 1.75958700  | 1.43031500  |
| H  | 5.22122600  | 3.15402100  | 0.40836600  |
| Cl | 1.55588600  | -1.40927500 | 2.66059200  |
| N  | -1.09465800 | -1.86565900 | 1.02982200  |
| N  | 1.35143500  | -2.19746300 | -0.41719500 |
| O  | -0.17684600 | 0.35295200  | -0.54703800 |
| P  | -0.28505400 | 2.70916700  | 1.14327400  |
| P  | 1.69840000  | 1.81397800  | 1.40733400  |
| Ti | 0.54225500  | -0.67344400 | 0.64961100  |
| C  | 2.71512700  | 4.14336400  | 0.06246300  |
| H  | 2.57859600  | 4.75688200  | 0.95963600  |
| H  | 3.51048400  | 4.59736900  | -0.54930900 |
| H  | 1.78686000  | 4.17103300  | -0.51113500 |
| C  | 3.20301900  | 1.50062600  | 3.83996900  |
| H  | 3.13153800  | 0.42251200  | 3.66473200  |
| H  | 4.14523500  | 1.86869900  | 3.42930800  |
| H  | 3.22843600  | 1.66821600  | 4.92747000  |
| C  | -0.01052700 | 2.66369700  | -1.75780000 |
| C  | -0.06316200 | 4.05869900  | -1.97039400 |
| C  | 0.58532800  | 1.85918300  | -2.74046000 |
| C  | 0.48614900  | 4.62919500  | -3.12423500 |
| H  | -0.53854000 | 4.68696900  | -1.21874100 |
| C  | 1.15317800  | 2.43240400  | -3.88759600 |
| H  | 0.62332800  | 0.78826800  | -2.57582600 |
| C  | 1.10549000  | 3.81762000  | -4.08753800 |
| H  | 0.43708900  | 5.70767800  | -3.26487300 |
| H  | 1.64114400  | 1.79097800  | -4.62006200 |
| H  | 1.54545500  | 4.26068100  | -4.97924100 |
| C  | -2.20827900 | 2.04349500  | -0.76741500 |
| C  | -2.74972300 | 2.14403900  | -2.07066200 |
| C  | -3.10008100 | 1.86577900  | 0.31109300  |
| C  | -4.12471400 | 2.06762100  | -2.28987200 |
| H  | -2.08758300 | 2.28276500  | -2.92051400 |
| C  | -4.47648100 | 1.82938800  | 0.11202600  |
| H  | -2.69210900 | 1.76546200  | 1.31304400  |
| C  | -5.00206500 | 1.91046000  | -1.19611900 |
| H  | -4.52537700 | 2.12811400  | -3.29889500 |
| H  | -5.14920200 | 1.71217700  | 0.95535100  |
| C  | -6.41392900 | 1.80075700  | -1.40711100 |
| N  | -7.57177000 | 1.69171800  | -1.57389600 |

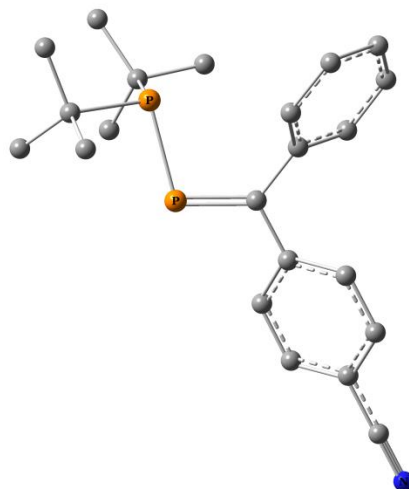

**Figure S182.** Optimized structure of *E-3c*.

Below are presented xyz coordinates for optimized geometry of *E-3c*:

|   |             |             |             |
|---|-------------|-------------|-------------|
| C | 0.42445000  | 3.60122200  | -1.26892400 |
| C | 0.20748100  | 2.21933400  | -1.27260400 |
| C | -0.55176000 | 1.61007100  | -0.25243900 |
| C | -1.09855200 | 2.42430600  | 0.76378600  |
| C | -0.86052400 | 3.80301400  | 0.77954300  |
| C | -0.09855800 | 4.39628800  | -0.23822200 |
| H | 1.00385300  | 4.05681800  | -2.06977300 |
| H | -1.27410200 | 4.41314200  | 1.58051700  |
| C | -0.79737000 | 0.14534700  | -0.23623700 |
| P | 0.37840500  | -1.11366000 | -0.36083200 |
| P | 2.33654500  | -0.05123700 | -0.18024600 |
| C | 2.64704300  | -0.30997200 | 1.70892200  |
| C | 1.84359100  | 0.83560800  | 2.36777600  |
| C | 2.18395200  | -1.64719200 | 2.31956500  |
| C | 4.14825300  | -0.09993700 | 1.99106700  |
| H | 2.13971400  | 1.81621400  | 1.97540600  |
| H | 0.76680700  | 0.71282900  | 2.19712600  |
| H | 2.01772400  | 0.82488600  | 3.45447600  |
| H | 2.70362900  | -2.50759000 | 1.88748500  |
| H | 2.38496800  | -1.63709000 | 3.40212800  |
| H | 1.10479400  | -1.79671400 | 2.18193900  |
| H | 4.30254800  | -0.01329500 | 3.07738800  |
| H | 4.74898100  | -0.94669700 | 1.63801100  |
| H | 4.52523600  | 0.81772700  | 1.52056400  |
| C | 3.39697800  | -1.28244300 | -1.20748000 |
| C | 4.81065300  | -0.67243200 | -1.35367400 |
| C | 3.49831700  | -2.72396600 | -0.67768200 |
| C | 2.74288000  | -1.29558400 | -2.61013800 |
| H | 4.75977000  | 0.35396200  | -1.73901900 |
| H | 5.35524600  | -0.65435100 | -0.40368400 |
| H | 5.39532100  | -1.27741700 | -2.06327600 |
| H | 2.50779100  | -3.16958100 | -0.52070100 |
| H | 4.03790100  | -3.34655200 | -1.40819700 |
| H | 4.05467500  | -2.76780900 | 0.26622700  |
| H | 3.38536000  | -1.85437900 | -3.30689500 |
| H | 1.75771400  | -1.78172700 | -2.59685900 |
| H | 2.61938000  | -0.27712600 | -3.00339300 |
| H | 0.60985600  | 1.60175600  | -2.07145800 |
| H | -1.69493500 | 1.96444400  | 1.55023100  |
| C | -2.21707300 | -0.27116500 | -0.13100200 |
| C | -2.59435000 | -1.47163000 | 0.51843700  |
| C | -3.23711700 | 0.52563900  | -0.70732500 |
| C | -3.92615900 | -1.87749700 | 0.56879400  |
| H | -1.82693300 | -2.07236400 | 1.00198200  |
| C | -4.57222900 | 0.12960500  | -0.66384600 |

|   |             |             |             |
|---|-------------|-------------|-------------|
| H | -2.96758700 | 1.45257300  | -1.20770000 |
| C | -4.92916800 | -1.07878400 | -0.02448900 |
| H | -4.20352600 | -2.79734700 | 1.07735000  |
| H | -5.34440200 | 0.74362000  | -1.12044400 |
| H | 0.07879100  | 5.47013200  | -0.23271700 |
| C | -6.30163500 | -1.48346400 | 0.03598000  |
| N | -7.42677900 | -1.81611700 | 0.08437100  |

### E.3.6. Reaction of **1** with 4,4'-dicyanobenzophenone leading to **3d**

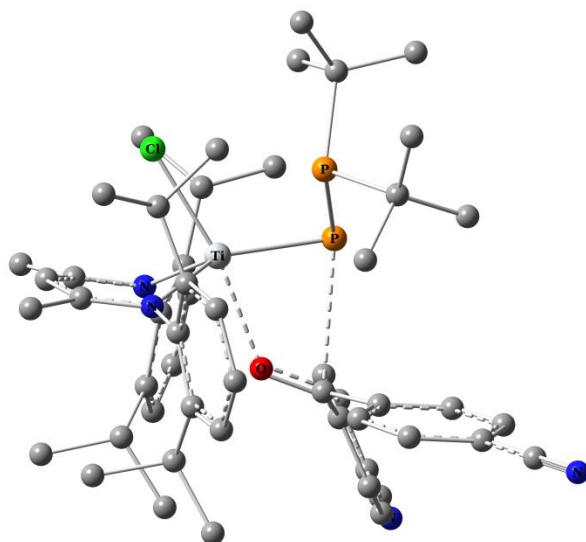

**Figure S183.** Optimized structure of **3d<sub>Ts1</sub>**.

Below are presented xyz coordinates for optimized geometry of **3d<sub>Ts1</sub>**:

|   |             |             |             |
|---|-------------|-------------|-------------|
| C | 2.73143998  | -1.66339801 | 0.40012997  |
| C | 3.34842836  | -2.08529310 | -0.80406942 |
| C | 4.73364929  | -1.87130850 | -0.93956428 |
| H | 5.23619196  | -2.21944878 | -1.84075348 |
| C | 5.48012250  | -1.24051420 | 0.06045770  |
| H | 6.55214759  | -1.09639352 | -0.06494882 |
| C | 4.83871802  | -0.77791233 | 1.21379395  |
| H | 5.41729995  | -0.26398552 | 1.97996284  |
| C | 3.46194058  | -0.97534437 | 1.40621197  |
| C | 2.58916356  | -2.79378475 | -1.92184983 |
| H | 1.51359441  | -2.68694683 | -1.72291333 |
| C | 2.88195646  | -2.14966862 | -3.29269565 |
| H | 2.33872976  | -2.68612053 | -4.07977060 |
| H | 2.55884335  | -1.10134918 | -3.31224882 |
| H | 3.95079557  | -2.19410641 | -3.54046173 |
| C | 2.91744747  | -4.30242513 | -1.96952826 |
| H | 2.33735542  | -4.78581677 | -2.76621136 |
| H | 3.98516519  | -4.46338426 | -2.17413843 |
| H | 2.67383812  | -4.79818001 | -1.02437802 |
| C | 2.80115051  | -0.51044577 | 2.70189893  |
| H | 1.71668721  | -0.58707866 | 2.56175220  |
| C | 3.13581215  | 0.95900199  | 3.02677002  |
| H | 2.60440543  | 1.26959483  | 3.93566089  |
| H | 4.20947242  | 1.09941396  | 3.20965513  |
| H | 2.84066962  | 1.62171062  | 2.20812336  |
| C | 3.20534038  | -1.41207624 | 3.89111250  |
| H | 2.91395785  | -2.45473242 | 3.72609916  |
| H | 4.29262026  | -1.38308572 | 4.04648364  |
| H | 2.71857548  | -1.06494967 | 4.81212894  |
| C | -2.33178272 | -0.34246527 | 2.16337857  |
| C | -2.05013938 | 0.80642948  | 2.95354043  |
| C | -3.11482871 | 1.67416750  | 3.25810575  |



|    |             |             |             |
|----|-------------|-------------|-------------|
| H  | -2.92357671 | 2.56549882  | 3.85174674  |
| C  | -4.41688332 | 1.41351052  | 2.81431311  |
| H  | -5.22216763 | 2.10856121  | 3.04669141  |
| C  | -4.68412148 | 0.23777352  | 2.10964991  |
| H  | -5.70705673 | 0.00987602  | 1.81243607  |
| C  | -3.66228845 | -0.67626313 | 1.79478058  |
| C  | -0.64608675 | 1.06613976  | 3.50765980  |
| H  | 0.06445039  | 0.83254033  | 2.70338782  |
| C  | -0.41308702 | 2.52292474  | 3.95911489  |
| H  | 0.64846524  | 2.66099452  | 4.19806045  |
| H  | -0.68089971 | 3.25586701  | 3.18931522  |
| H  | -0.98574859 | 2.75644831  | 4.86741371  |
| C  | -0.32767836 | 0.13542362  | 4.70354087  |
| H  | 0.62814250  | 0.42965763  | 5.15660792  |
| H  | -1.10794448 | 0.21248540  | 5.47244394  |
| H  | -0.23860469 | -0.91027412 | 4.39771356  |
| C  | -4.03958329 | -2.02918889 | 1.18776060  |
| H  | -3.13566284 | -2.64538886 | 1.12879488  |
| C  | -4.59422743 | -1.93004121 | -0.24463997 |
| H  | -4.92020160 | -2.92041686 | -0.58755794 |
| H  | -5.45508723 | -1.24819644 | -0.29366056 |
| H  | -3.81377379 | -1.57832185 | -0.92862850 |
| C  | -5.07530610 | -2.74913368 | 2.08677693  |
| H  | -5.20620730 | -3.78463209 | 1.74600350  |
| H  | -4.77084149 | -2.76383947 | 3.13987599  |
| H  | -6.05384775 | -2.25353091 | 2.03099037  |
| C  | 2.27472878  | -4.09912124 | 1.72505428  |
| H  | 2.21145754  | -4.57418469 | 2.70912051  |
| H  | 2.09752282  | -4.87317434 | 0.96510774  |
| H  | 3.28392951  | -3.70717691 | 1.57614228  |
| C  | 1.20219868  | -3.03747225 | 1.56796210  |
| C  | 0.05343366  | -3.19100705 | 2.34833049  |
| H  | 0.03557723  | -4.06993531 | 2.98852720  |
| C  | -1.03140793 | -2.30343378 | 2.52792661  |
| C  | -1.96279920 | -2.67883045 | 3.66967204  |
| H  | -1.38292179 | -3.05764190 | 4.51830547  |
| H  | -2.57937355 | -1.84060858 | 4.00149206  |
| H  | -2.62683372 | -3.48677463 | 3.33476050  |
| C  | 0.92653779  | 1.85520137  | -0.02670749 |
| C  | -1.95587541 | -1.83511294 | -3.86897254 |
| C  | -2.03067744 | -1.02403513 | -5.17994394 |
| H  | -2.93685783 | -0.41680377 | -5.26346877 |
| H  | -1.15761283 | -0.36599556 | -5.27724281 |
| H  | -2.02364407 | -1.72586153 | -6.02816098 |
| C  | -0.67820708 | -2.69371269 | -3.94811372 |
| H  | -0.52403003 | -3.28682199 | -3.04306409 |
| H  | -0.77239695 | -3.37695529 | -4.80628476 |
| H  | 0.19933010  | -2.05771345 | -4.10584899 |
| C  | -3.02018440 | 0.81560241  | -2.53588994 |
| C  | -3.21665651 | 1.30716110  | -1.09206200 |
| H  | -2.25357391 | 1.37671314  | -0.57459521 |
| H  | -3.67594726 | 2.30633252  | -1.09043788 |
| H  | -3.85647469 | 0.63142092  | -0.51935675 |
| C  | -4.40694781 | 0.44463896  | -3.10175360 |
| H  | -4.37838702 | 0.15697754  | -4.15739257 |
| H  | -4.87717184 | -0.36381573 | -2.53168067 |
| H  | -5.05613894 | 1.32980888  | -3.01958556 |
| Cl | -1.06227766 | -3.36509275 | -0.58581801 |
| N  | 1.36124746  | -2.00645090 | 0.69553322  |
| N  | -1.24814624 | -1.21236200 | 1.76860559  |
| O  | 0.64551870  | 0.76958355  | 0.56645455  |
| P  | 0.15524370  | 0.05507565  | -2.13232076 |
| P  | -1.82280192 | -0.68541973 | -2.33362504 |
| Ti | -0.31226631 | -1.17785627 | -0.16123628 |
| C  | -2.37912761 | 1.93636852  | -3.37853265 |
| H  | -2.20376867 | 1.62463265  | -4.41382687 |
| H  | -3.04883647 | 2.81040821  | -3.38891363 |
| H  | -1.41811869 | 2.23891516  | -2.94484199 |

|   |             |             |             |
|---|-------------|-------------|-------------|
| C | -3.18262244 | -2.75696642 | -3.69829327 |
| H | -3.08807476 | -3.35225948 | -2.78268378 |
| H | -4.12237961 | -2.19522869 | -3.65505062 |
| H | -3.24226388 | -3.44485916 | -4.55564361 |
| C | -0.06209445 | 2.93625292  | -0.24109810 |
| C | 0.13110502  | 3.91957194  | -1.24139961 |
| C | -1.17965812 | 3.03561183  | 0.60798250  |
| C | -0.77057211 | 4.96970743  | -1.38333656 |
| H | 0.96870521  | 3.82932869  | -1.92859918 |
| C | -2.07229738 | 4.09894887  | 0.49758121  |
| H | -1.34651247 | 2.26186344  | 1.34827276  |
| C | -1.87410437 | 5.07583566  | -0.50116627 |
| H | -0.63719989 | 5.71043445  | -2.16745724 |
| H | -2.92759472 | 4.16618995  | 1.16524596  |
| C | 2.34776500  | 2.18885834  | -0.34619185 |
| C | 2.88032144  | 3.42888583  | 0.07279603  |
| C | 3.17035653  | 1.27684066  | -1.02931662 |
| C | 4.21929030  | 3.74086098  | -0.16274634 |
| H | 2.24922766  | 4.13512037  | 0.60821003  |
| C | 4.49579082  | 1.59883536  | -1.31296797 |
| H | 2.75523540  | 0.33156857  | -1.36176434 |
| C | 5.03283084  | 2.82592800  | -0.86659072 |
| H | 4.63856573  | 4.68199412  | 0.18354410  |
| H | 5.12004420  | 0.90264558  | -1.86411785 |
| C | 6.40767766  | 3.13906180  | -1.12511692 |
| N | 7.53610307  | 3.38803736  | -1.33248114 |
| C | -2.79776321 | 6.16173603  | -0.63513984 |
| N | -3.55857710 | 7.04967412  | -0.74501313 |

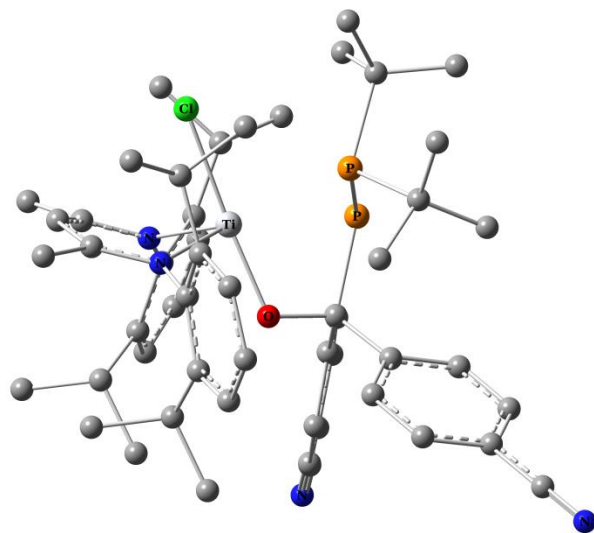

**Figure S184.** Optimized structure of **3dI**.

Below are presented xyz coordinates for optimized geometry of **3dI**:

|   |             |             |             |
|---|-------------|-------------|-------------|
| C | -2.89295675 | -1.43938407 | 0.16264202  |
| C | -3.34902948 | -1.43866206 | 1.50661922  |
| C | -4.65954224 | -0.99448621 | 1.75057754  |
| H | -5.04464619 | -1.00326256 | 2.76765841  |
| C | -5.47558451 | -0.52627810 | 0.71505408  |
| H | -6.48337070 | -0.17459436 | 0.92941071  |
| C | -4.98704961 | -0.48951075 | -0.59321892 |
| H | -5.62208701 | -0.10800930 | -1.39146746 |
| C | -3.69756145 | -0.95514605 | -0.90125058 |
| C | -2.47519344 | -1.94812596 | 2.64930732  |
| H | -1.43508745 | -1.67396602 | 2.40900756  |
| C | -2.80817647 | -1.29197415 | 4.00134864  |
| H | -2.07330610 | -1.60769233 | 4.75061780  |

|   |             |             |             |
|---|-------------|-------------|-------------|
| H | -2.78262629 | -0.19692072 | 3.94016996  |
| H | -3.79832895 | -1.59530753 | 4.36758321  |
| C | -2.51970403 | -3.48467077 | 2.78295019  |
| H | -1.93047023 | -3.79877108 | 3.65409441  |
| H | -3.55280527 | -3.83476113 | 2.91428934  |
| H | -2.08582527 | -3.96849702 | 1.90444604  |
| C | -3.24382514 | -1.00240076 | -2.35987185 |
| H | -2.19740072 | -1.32872617 | -2.38037526 |
| C | -3.31732471 | 0.37726212  | -3.04145651 |
| H | -3.06282692 | 0.28228737  | -4.10491820 |
| H | -4.32604408 | 0.80552821  | -2.97584844 |
| H | -2.62006961 | 1.07658131  | -2.57568336 |
| C | -4.08788069 | -2.01673116 | -3.16729378 |
| H | -4.08815110 | -3.00962413 | -2.70655882 |
| H | -5.13110398 | -1.68036088 | -3.23809633 |
| H | -3.69034770 | -2.10834277 | -4.18689240 |
| C | 2.04326789  | -1.10975135 | -2.15260143 |
| C | 1.75225994  | -0.06847090 | -3.07451505 |
| C | 2.83431456  | 0.63950447  | -3.62567191 |
| H | 2.64063759  | 1.45294642  | -4.32153789 |
| C | 4.15819751  | 0.30500401  | -3.31450391 |
| H | 4.98020236  | 0.87204785  | -3.74821782 |
| C | 4.41902648  | -0.77858677 | -2.47332333 |
| H | 5.45012884  | -1.06336782 | -2.26712203 |
| C | 3.37534951  | -1.51203264 | -1.88029109 |
| C | 0.31927968  | 0.19422949  | -3.54183368 |
| H | -0.32794155 | 0.11647989  | -2.66043090 |
| C | 0.11152878  | 1.58373309  | -4.17487768 |
| H | -0.95617436 | 1.73443078  | -4.37495439 |
| H | 0.44974922  | 2.39710906  | -3.52324077 |
| H | 0.63767523  | 1.67271518  | -5.13549717 |
| C | -0.11459355 | -0.88196431 | -4.56741361 |
| H | -1.11040466 | -0.64397970 | -4.96337658 |
| H | 0.58873300  | -0.91878966 | -5.41028728 |
| H | -0.16643728 | -1.87755893 | -4.11693258 |
| C | 3.71327128  | -2.73746256 | -1.03068702 |
| H | 2.77766599  | -3.24018098 | -0.76077680 |
| C | 4.40185501  | -2.36182638 | 0.29346878  |
| H | 4.63450820  | -3.26658394 | 0.86970972  |
| H | 5.33933095  | -1.81769538 | 0.11104149  |
| H | 3.73444496  | -1.73648879 | 0.89634527  |
| C | 4.60602277  | -3.72872169 | -1.81435111 |
| H | 4.70942267  | -4.66463545 | -1.24951191 |
| H | 4.19580762  | -3.96217028 | -2.80390876 |
| H | 5.61328323  | -3.31666113 | -1.96164340 |
| C | -2.81703823 | -4.17514668 | -0.62933888 |
| H | -3.07442955 | -4.60505143 | -1.60319534 |
| H | -2.54006700 | -5.00703621 | 0.03268546  |
| H | -3.69391585 | -3.67761427 | -0.21006432 |
| C | -1.62167609 | -3.24589449 | -0.75039892 |
| C | -0.54605942 | -3.71280417 | -1.51366194 |
| H | -0.66468505 | -4.71155740 | -1.92841505 |
| C | 0.58193844  | -2.99871287 | -1.97774277 |
| C | 1.35868139  | -3.69151745 | -3.08545850 |
| H | 0.66494160  | -4.16148920 | -3.79114703 |
| H | 2.01285348  | -3.00458323 | -3.62697265 |
| H | 1.97665152  | -4.48687834 | -2.64829494 |
| C | -0.35733092 | 1.58246980  | 0.47984219  |
| C | 2.15922782  | -0.79203984 | 3.79761647  |
| C | 2.48254068  | 0.32316119  | 4.81601415  |
| H | 3.46473865  | 0.77873891  | 4.66872425  |
| H | 1.71933225  | 1.11104263  | 4.78278559  |
| H | 2.47219641  | -0.11789097 | 5.82404676  |
| C | 0.82474113  | -1.41570713 | 4.26517546  |
| H | 0.47430389  | -2.20487106 | 3.59727866  |
| H | 0.99867498  | -1.85487553 | 5.25941807  |
| H | 0.04287221  | -0.65478786 | 4.36836017  |
| C | 3.49350497  | 1.17857216  | 1.75715698  |

|    |             |             |             |
|----|-------------|-------------|-------------|
| C  | 3.68798586  | 1.24734875  | 0.22663503  |
| H  | 2.74301781  | 1.24917596  | -0.31878851 |
| H  | 4.23929519  | 2.16066595  | -0.03861495 |
| H  | 4.25973332  | 0.38463553  | -0.12418757 |
| C  | 4.83932297  | 0.68898078  | 2.34199169  |
| H  | 4.86616911  | 0.68486911  | 3.43544160  |
| H  | 5.11101676  | -0.30649591 | 1.97700498  |
| H  | 5.61462352  | 1.38960060  | 1.99635829  |
| Cl | 0.79682452  | -3.14608887 | 1.35325975  |
| N  | -1.61177001 | -2.02341955 | -0.16226583 |
| N  | 0.94755022  | -1.79284881 | -1.50492192 |
| O  | -0.15223001 | 0.55110490  | -0.49319449 |
| P  | 0.01139838  | 0.73818378  | 2.18152345  |
| P  | 2.04967284  | -0.09051130 | 1.98823221  |
| Ti | 0.14369517  | -1.12448898 | 0.33581374  |
| C  | 3.16572188  | 2.56419610  | 2.34106115  |
| H  | 3.04676851  | 2.53389001  | 3.42854718  |
| H  | 3.99249357  | 3.25174598  | 2.10583414  |
| H  | 2.25186021  | 2.97575389  | 1.91084331  |
| C  | 3.23398769  | -1.90187274 | 3.80916981  |
| H  | 2.95665000  | -2.70939691 | 3.12250056  |
| H  | 4.22680609  | -1.53215056 | 3.53640523  |
| H  | 3.29881201  | -2.31937335 | 4.82524672  |
| C  | 0.44188858  | 2.83397746  | 0.15980440  |
| C  | 0.29980449  | 3.97798712  | 0.97305065  |
| C  | 1.24220071  | 2.90593681  | -0.98697646 |
| C  | 0.97035173  | 5.15850027  | 0.66355822  |
| H  | -0.33638612 | 3.93086395  | 1.85565428  |
| C  | 1.92808974  | 4.08064188  | -1.30792126 |
| H  | 1.33175450  | 2.02553589  | -1.61566745 |
| C  | 1.80029927  | 5.21592877  | -0.48214521 |
| H  | 0.86520855  | 6.03710421  | 1.29508090  |
| H  | 2.55989276  | 4.12405733  | -2.19216280 |
| C  | -1.83828195 | 2.01626314  | 0.42537918  |
| C  | -2.27456617 | 2.69350190  | -0.73131956 |
| C  | -2.74319252 | 1.82789877  | 1.47854757  |
| C  | -3.58402534 | 3.15357876  | -0.84551301 |
| H  | -1.57039550 | 2.86965222  | -1.54176183 |
| C  | -4.05847736 | 2.29071136  | 1.38535719  |
| H  | -2.41886392 | 1.32051040  | 2.38356629  |
| C  | -4.49065974 | 2.94917450  | 0.21807530  |
| H  | -3.91474208 | 3.66575303  | -1.74570315 |
| H  | -4.75440726 | 2.13296732  | 2.20453802  |
| C  | -5.85276279 | 3.37653099  | 0.10035558  |
| N  | -6.97630299 | 3.70333410  | -0.00078622 |
| C  | 2.50718057  | 6.42059523  | -0.80072399 |
| N  | 3.09124311  | 7.40556610  | -1.06187281 |

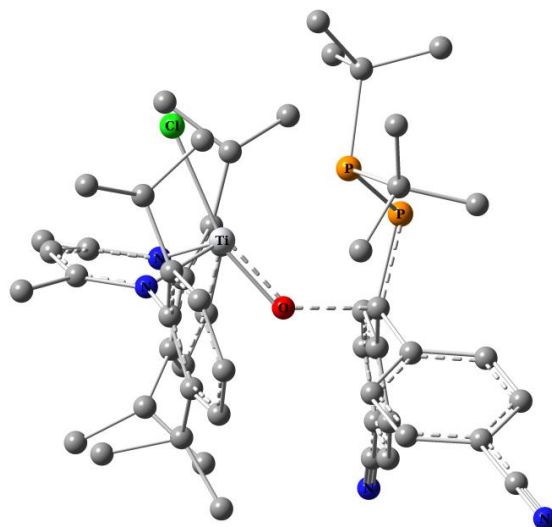

**Figure S185.** Optimized structure of **3dTs2**.

Below are presented xyz coordinates for optimized geometry of **3dTs2**:

|   |             |             |             |
|---|-------------|-------------|-------------|
| C | -3.07767330 | -0.99077479 | -0.24535521 |
| C | -3.62788530 | -1.33013572 | 1.01631124  |
| C | -4.92334143 | -0.86904982 | 1.30813470  |
| H | -5.38415180 | -1.13855256 | 2.25548506  |
| C | -5.62852036 | -0.05722995 | 0.41185371  |
| H | -6.62958320 | 0.29101494  | 0.66086758  |
| C | -5.02597874 | 0.34154406  | -0.78299489 |
| H | -5.55718593 | 1.01478292  | -1.45431936 |
| C | -3.74881127 | -0.12408693 | -1.14036709 |
| C | -2.85180030 | -2.17979866 | 2.01911607  |
| H | -1.79416823 | -1.87880783 | 1.93340204  |
| C | -3.28489491 | -1.92090398 | 3.47412004  |
| H | -2.63099559 | -2.47595188 | 4.15520584  |
| H | -3.22630677 | -0.85710045 | 3.73675067  |
| H | -4.31112961 | -2.26760715 | 3.65554616  |
| C | -2.93040838 | -3.69226972 | 1.71783379  |
| H | -2.40042479 | -4.25213196 | 2.49901135  |
| H | -3.97716120 | -4.02712805 | 1.70215211  |
| H | -2.45515811 | -3.93998292 | 0.76464162  |
| C | -3.12858997 | 0.32308098  | -2.46024494 |
| H | -2.17326181 | -0.20136527 | -2.58159208 |
| C | -2.83452491 | 1.83685115  | -2.41190363 |
| H | -2.42959458 | 2.17728656  | -3.37367113 |
| H | -3.74969696 | 2.40850063  | -2.20971635 |
| H | -2.11155481 | 2.06301767  | -1.62270459 |
| C | -4.01905771 | -0.00820408 | -3.67767000 |
| H | -4.23219327 | -1.08154064 | -3.74976012 |
| H | -4.97811611 | 0.52358020  | -3.62544882 |
| H | -3.51625898 | 0.29871820  | -4.60404586 |
| C | 1.89858357  | -0.92451582 | -2.42817260 |
| C | 1.84519414  | 0.36304228  | -3.03095150 |
| C | 3.06303547  | 0.99639849  | -3.32596528 |
| H | 3.05622889  | 1.98377223  | -3.78112676 |
| C | 4.29072770  | 0.37582225  | -3.05980535 |
| H | 5.22119286  | 0.89272967  | -3.28806866 |
| C | 4.31758094  | -0.91190246 | -2.52366173 |
| H | 5.27394797  | -1.40042309 | -2.34340442 |
| C | 3.12932737  | -1.59393160 | -2.20143845 |
| C | 0.50801315  | 1.00029309  | -3.40982132 |
| H | -0.15928459 | 0.89547798  | -2.54186031 |
| C | 0.61416258  | 2.49399635  | -3.77214196 |
| H | -0.39033125 | 2.90112993  | -3.93432422 |
| H | 1.08778020  | 3.08880314  | -2.98438198 |

|    |             |             |             |
|----|-------------|-------------|-------------|
| H  | 1.18055791  | 2.63864885  | -4.70240129 |
| C  | -0.13872397 | 0.25870746  | -4.60588361 |
| H  | -1.05796383 | 0.77579202  | -4.90978933 |
| H  | 0.54605387  | 0.24690509  | -5.46426600 |
| H  | -0.40602215 | -0.77215680 | -4.35772416 |
| C  | 3.21236965  | -3.02412948 | -1.67041751 |
| H  | 2.19718132  | -3.42827133 | -1.59449414 |
| C  | 3.80692509  | -3.07975755 | -0.25049962 |
| H  | 3.86278394  | -4.12013253 | 0.09387134  |
| H  | 4.81800746  | -2.65006504 | -0.22852443 |
| H  | 3.16954212  | -2.53212224 | 0.45262760  |
| C  | 4.03356128  | -3.92503655 | -2.62199286 |
| H  | 3.96081012  | -4.97134935 | -2.29795324 |
| H  | 3.68087556  | -3.85554357 | -3.65820548 |
| H  | 5.09578591  | -3.64691391 | -2.61262796 |
| C  | -3.47271937 | -3.26173734 | -1.72153850 |
| H  | -3.99842685 | -3.31090895 | -0.76441593 |
| H  | -4.08643305 | -2.64997900 | -2.39401816 |
| H  | -3.39404838 | -4.26617387 | -2.15000616 |
| C  | -2.08580440 | -2.66129442 | -1.57213957 |
| C  | -1.10120403 | -3.14700573 | -2.45209458 |
| H  | -1.39902736 | -3.98277119 | -3.08010395 |
| C  | 0.14090971  | -2.56675783 | -2.76109309 |
| C  | 0.85532281  | -3.09165563 | -3.99053222 |
| H  | 0.12964395  | -3.31489953 | -4.77991780 |
| H  | 1.59138795  | -2.37663998 | -4.36786121 |
| H  | 1.37797482  | -4.02461093 | -3.74216303 |
| C  | -0.15384411 | 1.72068586  | 1.37081421  |
| C  | 1.58037467  | -1.92981212 | 3.69494135  |
| C  | 2.03872673  | -1.24706260 | 5.00294204  |
| H  | 3.09157530  | -0.94862616 | 4.97945706  |
| H  | 1.43113565  | -0.35971699 | 5.22217396  |
| H  | 1.91524605  | -1.96004142 | 5.83229456  |
| C  | 0.12700890  | -2.40497554 | 3.89951090  |
| H  | -0.25457335 | -2.90404289 | 3.00339767  |
| H  | 0.11739749  | -3.13054934 | 4.72721532  |
| H  | -0.53591004 | -1.57427573 | 4.16039354  |
| C  | 3.41975882  | 0.08016345  | 2.16826568  |
| C  | 3.67311659  | 0.47574171  | 0.70145122  |
| H  | 2.85008070  | 1.05206238  | 0.27929726  |
| H  | 4.58314610  | 1.09095061  | 0.63664730  |
| H  | 3.81750190  | -0.40921419 | 0.07650000  |
| C  | 4.56288416  | -0.87270513 | 2.57912202  |
| H  | 4.54130943  | -1.13225212 | 3.64210100  |
| H  | 4.57764354  | -1.79231242 | 1.98774914  |
| H  | 5.50963679  | -0.34346590 | 2.39010323  |
| Cl | 0.39742808  | -3.46050239 | 0.51377651  |
| N  | -1.86755749 | -1.64424329 | -0.70215882 |
| N  | 0.66329541  | -1.56021491 | -2.02998469 |
| O  | -0.09628843 | 0.51399339  | -0.04322837 |
| P  | 0.05669221  | 0.67854616  | 2.85707083  |
| P  | 1.63056724  | -0.70312523 | 2.20427757  |
| Ti | 0.05846940  | -1.21118698 | -0.12922015 |
| C  | 3.47545829  | 1.31876410  | 3.08255554  |
| H  | 3.31393987  | 1.05672419  | 4.13373636  |
| H  | 4.47038966  | 1.78132280  | 2.99005203  |
| H  | 2.72585413  | 2.06138678  | 2.80302957  |
| C  | 2.43493078  | -3.18700234 | 3.40897000  |
| H  | 2.13516088  | -3.65880533 | 2.46783485  |
| H  | 3.50628298  | -2.97911626 | 3.38059386  |
| H  | 2.25980712  | -3.90775300 | 4.22195616  |
| C  | 0.91779306  | 2.70010054  | 0.95572850  |
| C  | 1.27188102  | 3.70050184  | 1.88949353  |
| C  | 1.50375640  | 2.73696937  | -0.31916689 |
| C  | 2.20356859  | 4.68747636  | 1.57053665  |
| H  | 0.80912659  | 3.68722700  | 2.87447099  |
| C  | 2.45240026  | 3.70875393  | -0.64723794 |
| H  | 1.22719631  | 1.97359267  | -1.03695609 |

|   |             |            |             |
|---|-------------|------------|-------------|
| C | 2.81281454  | 4.69237464 | 0.29538875  |
| H | 2.47225420  | 5.44724634 | 2.30019387  |
| H | 2.92459201  | 3.70351133 | -1.62664078 |
| C | -1.52389346 | 2.33670941 | 1.25994980  |
| C | -1.72895800 | 3.53830811 | 0.54168599  |
| C | -2.64064616 | 1.72615086 | 1.86842814  |
| C | -2.99701859 | 4.10851423 | 0.43369103  |
| H | -0.88968796 | 4.03179476 | 0.05982134  |
| C | -3.90423063 | 2.30389958 | 1.80157981  |
| H | -2.49670155 | 0.79079365 | 2.40202669  |
| C | -4.09809901 | 3.49342600 | 1.06556469  |
| H | -3.14266611 | 5.02282206 | -0.13631886 |
| H | -4.74941960 | 1.83078043 | 2.29068613  |
| C | -5.41221226 | 4.04737885 | 0.93726077  |
| N | -6.49639131 | 4.48443652 | 0.82136109  |
| C | 3.79191398  | 5.68387534 | -0.03844505 |
| N | 4.59667548  | 6.49267893 | -0.31661433 |

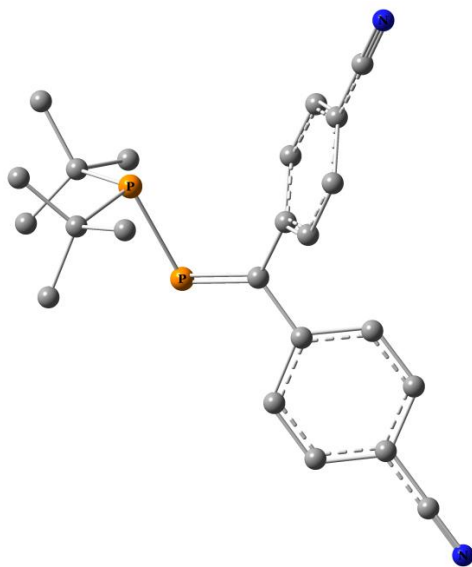

**Figure S186.** Optimized structure of **3d**.

Below are presented xyz coordinates for optimized geometry of **3d**:

|   |             |             |             |
|---|-------------|-------------|-------------|
| C | 0.83046700  | -0.21403700 | -0.22837900 |
| C | 2.26553700  | -0.57308900 | -0.13155800 |
| C | 2.69049700  | -1.77126200 | 0.49205600  |
| H | 1.94849900  | -2.41332600 | 0.96193700  |
| C | 4.03755400  | -2.12343500 | 0.53466700  |
| H | 4.35197300  | -3.04205200 | 1.02332300  |
| C | 5.00731600  | -1.27179800 | -0.04012500 |
| C | 4.60237000  | -0.06538100 | -0.65339300 |
| H | 5.34886700  | 0.58923200  | -1.09583100 |
| C | 3.25209200  | 0.27666600  | -0.69012300 |
| H | 2.94747400  | 1.20191600  | -1.17348100 |
| C | 6.39502700  | -1.62233700 | 0.01277700  |
| C | 0.52439200  | 1.23928700  | -0.21928200 |
| C | 1.01922400  | 2.05397200  | 0.82320700  |
| H | 1.62564600  | 1.60557300  | 1.60764100  |
| C | 0.72176200  | 3.41554300  | 0.87326300  |
| H | 1.09007900  | 4.03251600  | 1.68886600  |
| C | -0.05954400 | 3.99905900  | -0.14809300 |
| C | -0.53238600 | 3.20098600  | -1.21274500 |
| H | -1.12034200 | 3.65619300  | -2.00543100 |
| C | -0.24765600 | 1.83643200  | -1.23800800 |
| H | -0.61033100 | 1.22130500  | -2.05671200 |
| C | -0.36233800 | 5.39910600  | -0.10962900 |
| C | -3.31386500 | -1.72867900 | -1.23328800 |

|   |             |             |             |
|---|-------------|-------------|-------------|
| C | -2.64558300 | -1.69643700 | -2.62893800 |
| H | -2.54339200 | -0.66751100 | -3.00049700 |
| H | -1.64919000 | -2.15978600 | -2.61632500 |
| H | -3.26704300 | -2.25576700 | -3.34371700 |
| C | -4.73900900 | -1.14575100 | -1.37897900 |
| H | -4.70778700 | -0.11043600 | -1.74165000 |
| H | -5.30375100 | -1.74766000 | -2.10674100 |
| H | -5.29193200 | -1.16069900 | -0.43387700 |
| C | -3.38751400 | -3.18305700 | -0.73493700 |
| H | -3.95070400 | -3.25978700 | 0.20266100  |
| H | -3.90732600 | -3.80059700 | -1.48349300 |
| H | -2.38906800 | -3.61122900 | -0.57941200 |
| C | -2.60634400 | -0.80034800 | 1.71089000  |
| C | -4.11372100 | -0.62729500 | 1.98591900  |
| H | -4.50661400 | 0.29265900  | 1.53353500  |
| H | -4.69424300 | -1.47824600 | 1.61037200  |
| H | -4.27666800 | -0.56788800 | 3.07257400  |
| C | -2.11852500 | -2.14048700 | 2.29545900  |
| H | -1.03513500 | -2.26412900 | 2.16404600  |
| H | -2.32786300 | -2.15856000 | 3.37610400  |
| H | -2.61614400 | -3.00207300 | 1.84072700  |
| C | -1.83178900 | 0.34764500  | 2.39941200  |
| H | -2.14522900 | 1.33007700  | 2.02541200  |
| H | -2.01470700 | 0.31152800  | 3.48381800  |
| H | -0.75098600 | 0.24835300  | 2.23730200  |
| N | 7.53225600  | -1.91111900 | 0.05514500  |
| N | -0.61198300 | 6.54577800  | -0.07711700 |
| P | -0.30661100 | -1.50667100 | -0.35775000 |
| P | -2.29164000 | -0.49760000 | -0.17014300 |

### E.3.7. Reaction of **1** with 4,4'-dimethoxybenzophenone leading to **3e**

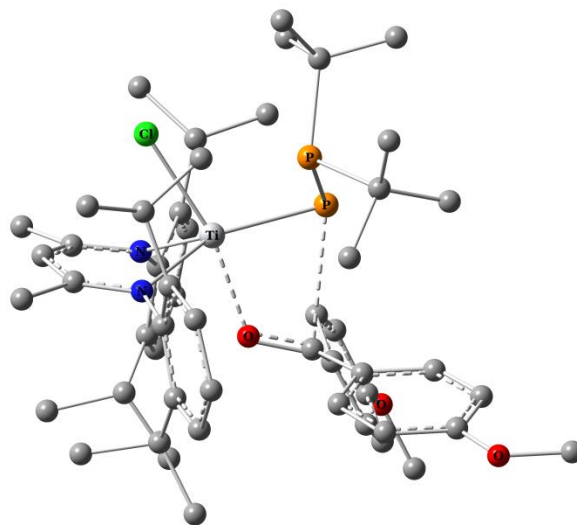

**Figure S187.** Optimized structure of **3ers1**.

Below are presented xyz coordinates for optimized geometry of **3ers1**:

|   |            |             |             |
|---|------------|-------------|-------------|
| C | 2.74840109 | -1.81396357 | 0.29003696  |
| C | 3.37723933 | -2.17377388 | -0.92864729 |
| C | 4.76660759 | -1.97340603 | -1.03363276 |
| H | 5.27548132 | -2.27066132 | -1.94968208 |
| C | 5.50744931 | -1.41333540 | 0.01170660  |
| H | 6.58251882 | -1.27438282 | -0.09290415 |
| C | 4.85641621 | -1.00869289 | 1.18126894  |
| H | 5.42978926 | -0.54540025 | 1.98310538  |
| C | 3.47454028 | -1.19547948 | 1.34231053  |
| C | 2.61851716 | -2.78550362 | -2.10306671 |
| H | 1.54345624 | -2.69436091 | -1.89659764 |



|   |             |             |             |
|---|-------------|-------------|-------------|
| C | 2.91658566  | -2.02883472 | -3.41464043 |
| H | 2.36746311  | -2.49207090 | -4.24345798 |
| H | 2.60284988  | -0.98007933 | -3.34634880 |
| H | 3.98572365  | -2.06177494 | -3.66469215 |
| C | 2.94433149  | -4.28473863 | -2.28264099 |
| H | 2.36487770  | -4.69460769 | -3.12016796 |
| H | 4.01233679  | -4.42950341 | -2.49885964 |
| H | 2.69771162  | -4.86282342 | -1.38612043 |
| C | 2.79571235  | -0.78567938 | 2.64614311  |
| H | 1.71395916  | -0.83496718 | 2.47827873  |
| C | 3.14790238  | 0.66117243  | 3.04632901  |
| H | 2.57284031  | 0.95105401  | 3.93574014  |
| H | 4.21344353  | 0.76393076  | 3.29430732  |
| H | 2.91583064  | 1.36092417  | 2.23774411  |
| C | 3.15853040  | -1.75457866 | 3.79482699  |
| H | 2.83031214  | -2.77714390 | 3.57891446  |
| H | 4.24520239  | -1.77141090 | 3.95861513  |
| H | 2.67677640  | -1.43422247 | 4.72807396  |
| C | -2.37713544 | -0.63181275 | 2.13561531  |
| C | -2.11068391 | 0.41242354  | 3.06528855  |
| C | -3.18142165 | 1.23669942  | 3.45721271  |
| H | -2.99949155 | 2.04955249  | 4.15706031  |
| C | -4.47574538 | 1.03734771  | 2.96262118  |
| H | -5.28414153 | 1.70232880  | 3.26312778  |
| C | -4.73025379 | -0.04320203 | 2.11538492  |
| H | -5.74810904 | -0.23286738 | 1.77568810  |
| C | -3.70262764 | -0.91488841 | 1.71224378  |
| C | -0.71430671 | 0.61182910  | 3.66490042  |
| H | 0.00356043  | 0.49294338  | 2.84273455  |
| C | -0.50263227 | 2.00220124  | 4.30004983  |
| H | 0.55473863  | 2.11729826  | 4.56924743  |
| H | -0.76657008 | 2.82422626  | 3.62465927  |
| H | -1.08917277 | 2.11431462  | 5.22302711  |
| C | -0.39021653 | -0.45677990 | 4.73724326  |
| H | 0.55561659  | -0.20341564 | 5.23460770  |
| H | -1.17868116 | -0.49231086 | 5.50128798  |
| H | -0.27634272 | -1.45333081 | 4.30289209  |
| C | -4.06880143 | -2.18959165 | 0.95034747  |
| H | -3.15992755 | -2.78865659 | 0.82550896  |
| C | -4.61455613 | -1.92278463 | -0.46260663 |
| H | -4.93243893 | -2.86530912 | -0.92703070 |
| H | -5.47829114 | -1.24292726 | -0.43588941 |
| H | -3.82884428 | -1.48697512 | -1.08923290 |
| C | -5.10750624 | -3.01395334 | 1.75072783  |
| H | -5.23318532 | -4.00236819 | 1.28881651  |
| H | -4.80970758 | -3.15298017 | 2.79667603  |
| H | -6.08734422 | -2.51703202 | 1.74784196  |
| C | 2.26282913  | -4.31070261 | 1.43123586  |
| H | 2.12053783  | -4.91516356 | 2.33253844  |
| H | 2.18188940  | -4.97457688 | 0.55969398  |
| H | 3.27258457  | -3.89109372 | 1.43497586  |
| C | 1.18437067  | -3.24670166 | 1.32470758  |
| C | 0.01884027  | -3.47018647 | 2.05885084  |
| H | -0.00885127 | -4.40397821 | 2.61566856  |
| C | -1.07681185 | -2.60654471 | 2.30046115  |
| C | -2.02212712 | -3.10594992 | 3.38443296  |
| H | -1.45294445 | -3.57252580 | 4.19592363  |
| H | -2.64801945 | -2.31136647 | 3.79679635  |
| H | -2.67703647 | -3.87511352 | 2.95335295  |
| C | 0.75959992  | 1.66777772  | 0.07852699  |
| C | -1.94105148 | -1.55854549 | -3.96313221 |
| C | -2.02377604 | -0.65260540 | -5.21032709 |
| H | -2.93411314 | -0.04745331 | -5.25015207 |
| H | -1.15473981 | 0.01615291  | -5.25813137 |
| H | -2.01216636 | -1.29110964 | -6.10746404 |
| C | -0.66547359 | -2.40873555 | -4.12804883 |
| H | -0.49605974 | -3.06845589 | -3.27406568 |
| H | -0.77796792 | -3.02364507 | -5.03488242 |

|    |             |             |             |
|----|-------------|-------------|-------------|
| H  | 0.21074930  | -1.76329489 | -4.25411913 |
| C  | -3.00247502 | 1.00275241  | -2.48224399 |
| C  | -3.19737664 | 1.41071584  | -1.01126711 |
| H  | -2.23515558 | 1.45450088  | -0.49336976 |
| H  | -3.65943538 | 2.40688067  | -0.94713353 |
| H  | -3.83109075 | 0.69838766  | -0.47527537 |
| C  | -4.39315541 | 0.67401982  | -3.06594257 |
| H  | -4.36990599 | 0.44371621  | -4.13577304 |
| H  | -4.87073175 | -0.15947332 | -2.54033179 |
| H  | -5.03445297 | 1.55950875  | -2.93338730 |
| Cl | -1.03418934 | -3.31475882 | -0.87030428 |
| N  | 1.36873927  | -2.14998447 | 0.54230516  |
| N  | -1.29025649 | -1.44955806 | 1.65504837  |
| O  | 0.47741772  | 0.57082440  | 0.71541076  |
| P  | 0.21082772  | 0.16398563  | -2.20639249 |
| P  | -1.81327151 | -0.51225399 | -2.34506299 |
| Ti | -0.24797292 | -1.14892050 | -0.26133781 |
| C  | -2.36158696 | 2.16734345  | -3.26085726 |
| H  | -2.22579059 | 1.92823955  | -4.32127146 |
| H  | -3.01105852 | 3.05430325  | -3.18606081 |
| H  | -1.38137846 | 2.41793856  | -2.83908961 |
| C  | -3.16603509 | -2.49143282 | -3.85664526 |
| H  | -3.06229479 | -3.15732097 | -2.99222775 |
| H  | -4.10539321 | -1.93525895 | -3.75990460 |
| H  | -3.23304087 | -3.10859857 | -4.76618237 |
| C  | -0.19270965 | 2.78898659  | 0.03798586  |
| C  | -0.06350068 | 3.82141680  | -0.91719826 |
| C  | -1.22826917 | 2.88468881  | 0.99120522  |
| C  | -0.92910027 | 4.91556873  | -0.91826366 |
| H  | 0.69843590  | 3.73818791  | -1.68903494 |
| C  | -2.07814595 | 3.98293528  | 1.02560992  |
| H  | -1.36573223 | 2.07046248  | 1.69188949  |
| C  | -1.93579804 | 5.00521036  | 0.06715034  |
| H  | -0.82523905 | 5.67704774  | -1.68587210 |
| H  | -2.87340880 | 4.05259738  | 1.76390246  |
| C  | 2.17126891  | 2.01284960  | -0.24872038 |
| C  | 2.68404285  | 3.24592104  | 0.21184814  |
| C  | 3.04554348  | 1.14804316  | -0.94014043 |
| C  | 4.02396700  | 3.60009449  | 0.01628049  |
| H  | 2.03771619  | 3.92253203  | 0.76633196  |
| C  | 4.36340214  | 1.50702338  | -1.18630366 |
| H  | 2.66940986  | 0.20644381  | -1.32193619 |
| C  | 4.86748447  | 2.72737376  | -0.69456546 |
| H  | 4.38932291  | 4.54228853  | 0.41493488  |
| H  | 5.02220066  | 0.84977630  | -1.74561459 |
| O  | -2.83142229 | 6.03524605  | 0.15916389  |
| O  | 6.18831737  | 2.97323811  | -0.96064423 |
| C  | -2.74132036 | 7.09044532  | -0.81214064 |
| H  | -2.90120529 | 6.70192240  | -1.82725417 |
| H  | -3.53881216 | 7.78923778  | -0.55106162 |
| H  | -1.76701172 | 7.59481419  | -0.75256595 |
| C  | 6.74511892  | 4.20631850  | -0.48076903 |
| H  | 6.68811519  | 4.26133533  | 0.61543736  |
| H  | 7.78992181  | 4.19374041  | -0.79855990 |
| H  | 6.22919731  | 5.06870666  | -0.92565803 |

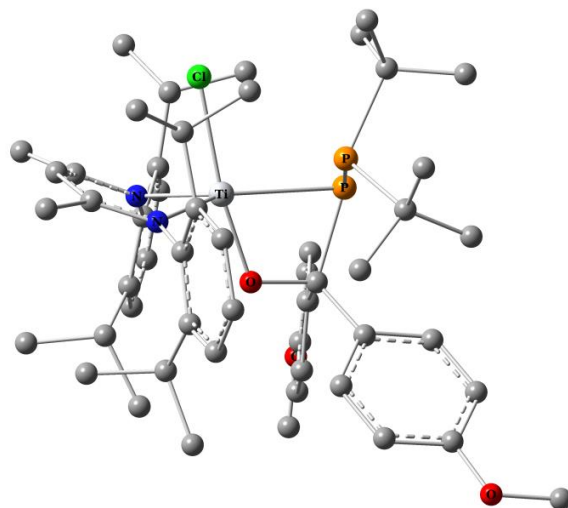

**Figure S188.** Optimized structure of **3er**.

Below are presented xyz coordinates for optimized geometry of **3er**:

|   |             |             |             |
|---|-------------|-------------|-------------|
| C | -2.19084190 | -2.33427757 | -0.18158541 |
| C | -2.87045996 | -2.74803015 | 0.98911442  |
| C | -4.27177442 | -2.63541682 | 1.00398499  |
| H | -4.82038817 | -2.94669108 | 1.89187152  |
| C | -4.97116043 | -2.12498570 | -0.09253242 |
| H | -6.05469569 | -2.02786631 | -0.05062181 |
| C | -4.27730317 | -1.72705119 | -1.24082807 |
| H | -4.83047984 | -1.34128336 | -2.09561492 |
| C | -2.88043500 | -1.83339271 | -1.31489709 |
| C | -2.14358941 | -3.35226453 | 2.18730415  |
| H | -1.10080417 | -3.53011896 | 1.89711399  |
| C | -2.11808535 | -2.37972705 | 3.38497349  |
| H | -1.61420742 | -2.84793400 | 4.24087716  |
| H | -1.57054836 | -1.46457983 | 3.13125181  |
| H | -3.13905009 | -2.10923341 | 3.69058464  |
| C | -2.76796037 | -4.69832571 | 2.61966901  |
| H | -2.13641245 | -5.17308867 | 3.38201896  |
| H | -3.76484752 | -4.55301676 | 3.05760348  |
| H | -2.87419596 | -5.39142280 | 1.77555416  |
| C | -2.14087786 | -1.56057391 | -2.62224471 |
| H | -1.07295757 | -1.49463458 | -2.38483368 |
| C | -2.54790470 | -0.24202781 | -3.30147309 |
| H | -2.02643069 | -0.14460495 | -4.26293839 |
| H | -3.62634631 | -0.19728996 | -3.50436753 |
| H | -2.27873057 | 0.60966043  | -2.67259599 |
| C | -2.34421008 | -2.74891495 | -3.59248712 |
| H | -1.99383419 | -3.69080517 | -3.15447748 |
| H | -3.40773130 | -2.86618480 | -3.84262140 |
| H | -1.78756501 | -2.57950941 | -4.52397735 |
| C | 2.89088823  | -0.70517518 | -1.71966230 |
| C | 2.58713701  | 0.21035650  | -2.76060781 |
| C | 3.60957640  | 1.06562400  | -3.20744830 |
| H | 3.39866957  | 1.78419501  | -3.99545275 |
| C | 4.89894458  | 1.00694215  | -2.66730541 |
| H | 5.67124300  | 1.68762669  | -3.02169593 |
| C | 5.19242894  | 0.05804297  | -1.68584224 |
| H | 6.20375978  | -0.00951926 | -1.28707494 |
| C | 4.20852726  | -0.82450297 | -1.20481700 |
| C | 1.21949179  | 0.20891118  | -3.44259167 |
| H | 0.45539026  | 0.15953122  | -2.65369139 |
| C | 0.96385995  | 1.46237576  | -4.30376074 |
| H | -0.09236739 | 1.49583296  | -4.59770232 |
| H | 1.20006755  | 2.39229389  | -3.77374769 |
| H | 1.56373705  | 1.43843959  | -5.22450835 |

|    |             |             |             |
|----|-------------|-------------|-------------|
| C  | 1.05236209  | -1.03761736 | -4.34672888 |
| H  | 0.11826265  | -0.96089147 | -4.91826895 |
| H  | 1.88442109  | -1.10711967 | -5.06046465 |
| H  | 1.01021774  | -1.96351092 | -3.76617654 |
| C  | 4.61285585  | -1.89096944 | -0.18993101 |
| H  | 3.76116632  | -2.56122789 | -0.02659478 |
| C  | 4.93801870  | -1.25784851 | 1.17140103  |
| H  | 5.17978699  | -2.03265290 | 1.91008992  |
| H  | 5.79485647  | -0.57355796 | 1.09303851  |
| H  | 4.06712543  | -0.70081415 | 1.52890062  |
| C  | 5.82060447  | -2.72280477 | -0.68111165 |
| H  | 5.98883776  | -3.57002597 | -0.00309083 |
| H  | 5.67385878  | -3.11241172 | -1.69529292 |
| H  | 6.73704474  | -2.11737605 | -0.68808869 |
| C  | -1.22922047 | -4.91285435 | -0.74918085 |
| H  | -0.84542064 | -5.69157752 | -1.41506365 |
| H  | -1.26739227 | -5.31772754 | 0.27080477  |
| H  | -2.25417601 | -4.65842495 | -1.03763840 |
| C  | -0.32078896 | -3.70136784 | -0.76551235 |
| C  | 0.95944965  | -3.85809876 | -1.29938245 |
| H  | 1.20496877  | -4.85627679 | -1.65356550 |
| C  | 1.90131920  | -2.85826890 | -1.63638076 |
| C  | 2.98455077  | -3.35273400 | -2.58711649 |
| H  | 2.52262656  | -3.95807391 | -3.37534480 |
| H  | 3.54953451  | -2.54045217 | -3.04758279 |
| H  | 3.68285155  | -3.99950395 | -2.04095815 |
| C  | -1.00003801 | 1.31503603  | 0.37371401  |
| C  | 2.11272341  | 0.32528996  | 3.89104287  |
| C  | 2.05514228  | 1.63261740  | 4.70908858  |
| H  | 2.89161634  | 2.30679616  | 4.50296826  |
| H  | 1.11310220  | 2.16550173  | 4.52966753  |
| H  | 2.09977215  | 1.36932068  | 5.77691558  |
| C  | 1.01541142  | -0.59745366 | 4.47232685  |
| H  | 0.90277765  | -1.52322698 | 3.90489917  |
| H  | 1.31925586  | -0.85278330 | 5.49952505  |
| H  | 0.04576084  | -0.09023259 | 4.52654235  |
| C  | 2.77250148  | 2.33331367  | 1.56042873  |
| C  | 2.82989650  | 2.31824680  | 0.01966778  |
| H  | 1.84669405  | 2.15776026  | -0.42573858 |
| H  | 3.20918745  | 3.28490642  | -0.34330196 |
| H  | 3.49928719  | 1.52877371  | -0.33093248 |
| C  | 4.23294910  | 2.31664806  | 2.06619659  |
| H  | 4.31310359  | 2.38854966  | 3.15599026  |
| H  | 4.77073805  | 1.42446081  | 1.72952801  |
| H  | 4.74300301  | 3.19339146  | 1.63839132  |
| Cl | 1.42372898  | -2.64079474 | 1.79794231  |
| N  | -0.76039148 | -2.50782652 | -0.30685656 |
| N  | 1.84987104  | -1.57741692 | -1.22100776 |
| O  | -0.42487467 | 0.33815345  | -0.53558041 |
| P  | -0.34312322 | 0.74000644  | 2.09156615  |
| P  | 1.85827947  | 0.69039063  | 1.98469332  |
| Ti | 0.48160159  | -1.03723538 | 0.34938776  |
| C  | 2.06928892  | 3.60940369  | 2.05580933  |
| H  | 2.11824728  | 3.71780403  | 3.14290771  |
| H  | 2.56967286  | 4.48090676  | 1.60547527  |
| H  | 1.02137024  | 3.63054751  | 1.75166325  |
| C  | 3.46779621  | -0.38396086 | 4.09517768  |
| H  | 3.45560636  | -1.37290617 | 3.62545318  |
| H  | 4.31319430  | 0.18666530  | 3.69716857  |
| H  | 3.63102174  | -0.51788544 | 5.17548742  |
| C  | -0.67887017 | 2.73473345  | -0.05828090 |
| C  | -1.07881305 | 3.81303179  | 0.74683760  |
| C  | -0.13306308 | 3.01081132  | -1.31941863 |
| C  | -0.90425703 | 5.13793397  | 0.32889071  |
| H  | -1.53614364 | 3.61388602  | 1.71576042  |
| C  | 0.05390563  | 4.32550851  | -1.75482507 |
| H  | 0.14291435  | 2.17650615  | -1.95461505 |
| C  | -0.32426083 | 5.39646250  | -0.92794065 |

|   |             |            |             |
|---|-------------|------------|-------------|
| H | -1.21579021 | 5.94781451 | 0.98287502  |
| H | 0.48718111  | 4.54088484 | -2.72939324 |
| C | -2.54361617 | 1.21083430 | 0.38245970  |
| C | -3.27471592 | 1.83446653 | -0.64431846 |
| C | -3.27408835 | 0.60261306 | 1.41954462  |
| C | -4.67439095 | 1.83747622 | -0.66388297 |
| H | -2.74588009 | 2.35683513 | -1.43788649 |
| C | -4.66891017 | 0.62295404 | 1.43703107  |
| H | -2.75242406 | 0.11673227 | 2.23939711  |
| C | -5.37791833 | 1.22875994 | 0.38886829  |
| H | -5.19268282 | 2.32511375 | -1.48525615 |
| H | -5.22252348 | 0.15153000 | 2.24531767  |
| O | -0.09435345 | 6.65719372 | -1.43323407 |
| O | -6.75136355 | 1.16717525 | 0.47681041  |
| C | -0.46745539 | 7.77096666 | -0.61289664 |
| H | 0.08402830  | 7.76296497 | 0.33857658  |
| H | -0.19797036 | 8.65902593 | -1.18952224 |
| H | -1.54899449 | 7.77067796 | -0.41363582 |
| C | -7.50254540 | 1.78081902 | -0.57743734 |
| H | -7.28063225 | 1.30996794 | -1.54644939 |
| H | -8.55186477 | 1.61945322 | -0.31905451 |
| H | -7.29450335 | 2.85901558 | -0.63510695 |

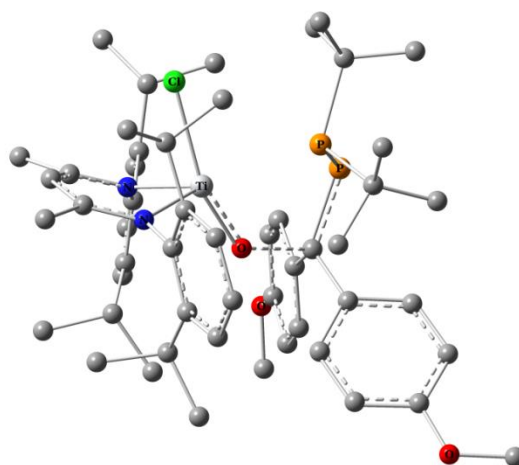

**Figure S189.** Optimized structure of **3ers2**.

Below are presented xyz coordinates for optimized geometry of **3ers2**:

|   |             |             |             |
|---|-------------|-------------|-------------|
| C | -2.04453318 | -2.36940073 | -0.43136161 |
| C | -2.71122661 | -2.98880102 | 0.65306470  |
| C | -4.11667898 | -3.01855539 | 0.62563243  |
| H | -4.65225343 | -3.50047851 | 1.44250188  |
| C | -4.83803586 | -2.44304665 | -0.42433250 |
| H | -5.92639995 | -2.47052572 | -0.41948592 |
| C | -4.15807011 | -1.81057527 | -1.46971093 |
| H | -4.72344020 | -1.36018077 | -2.28442532 |
| C | -2.75520154 | -1.76983606 | -1.50040007 |
| C | -1.95941905 | -3.63896833 | 1.81056267  |
| H | -0.89925449 | -3.70634087 | 1.53439518  |
| C | -2.05086308 | -2.75869104 | 3.07457733  |
| H | -1.52892914 | -3.24020248 | 3.91181461  |
| H | -1.58847524 | -1.77841300 | 2.90542903  |
| H | -3.10079025 | -2.60793071 | 3.36514845  |
| C | -2.47556664 | -5.05956208 | 2.13140754  |
| H | -1.81401554 | -5.53568060 | 2.86664220  |
| H | -3.48464217 | -5.02891151 | 2.56459024  |
| H | -2.51729719 | -5.69874605 | 1.23998954  |
| C | -2.02504380 | -1.22605415 | -2.72476203 |
| H | -0.96358210 | -1.14600615 | -2.46339653 |
| C | -2.51052248 | 0.17260303  | -3.14311396 |

|    |             |             |             |
|----|-------------|-------------|-------------|
| H  | -1.95633626 | 0.51015067  | -4.02933905 |
| H  | -3.57875169 | 0.17568683  | -3.39904415 |
| H  | -2.35206877 | 0.89154965  | -2.33470576 |
| C  | -2.15667197 | -2.22311602 | -3.90019133 |
| H  | -1.72977420 | -3.20045951 | -3.64481669 |
| H  | -3.21268476 | -2.37204215 | -4.16451432 |
| H  | -1.63107788 | -1.84464097 | -4.78661366 |
| C  | 2.95326440  | -0.47378421 | -1.79351830 |
| C  | 2.62505130  | 0.58310752  | -2.68297745 |
| C  | 3.60542914  | 1.55587802  | -2.93869009 |
| H  | 3.37803037  | 2.38342208  | -3.60528872 |
| C  | 4.87466236  | 1.48235483  | -2.35287294 |
| H  | 5.61293784  | 2.25648015  | -2.55547115 |
| C  | 5.19428751  | 0.40795969  | -1.52116620 |
| H  | 6.18984357  | 0.34087876  | -1.08512257 |
| C  | 4.25295117  | -0.59651011 | -1.23287593 |
| C  | 1.27092929  | 0.62494178  | -3.38525361 |
| H  | 0.50343323  | 0.44324642  | -2.61821049 |
| C  | 0.98360710  | 1.97708542  | -4.06273874 |
| H  | -0.06537841 | 2.01572421  | -4.38114119 |
| H  | 1.16943817  | 2.81979879  | -3.38908009 |
| H  | 1.60666026  | 2.11192704  | -4.95810409 |
| C  | 1.15547014  | -0.49288017 | -4.44973075 |
| H  | 0.22132006  | -0.37187711 | -5.01321789 |
| H  | 1.99159660  | -0.43304491 | -5.15949741 |
| H  | 1.14565239  | -1.49017781 | -4.00080624 |
| C  | 4.67477976  | -1.77558924 | -0.36100129 |
| H  | 3.86165562  | -2.50953696 | -0.34393353 |
| C  | 4.88758628  | -1.33249251 | 1.09549394  |
| H  | 5.13064138  | -2.19558195 | 1.72770628  |
| H  | 5.70625970  | -0.60284191 | 1.16947157  |
| H  | 3.96933660  | -0.88179348 | 1.48294215  |
| C  | 5.95286040  | -2.45761378 | -0.90065534 |
| H  | 6.14891490  | -3.37800818 | -0.33518263 |
| H  | 5.86786101  | -2.71328251 | -1.96378674 |
| H  | 6.82829252  | -1.80444675 | -0.78522180 |
| C  | -1.08580690 | -4.79176667 | -1.32460141 |
| H  | -0.63612539 | -5.53632629 | -1.98790295 |
| H  | -1.25191148 | -5.25263141 | -0.34342422 |
| H  | -2.06796596 | -4.50491440 | -1.71576977 |
| C  | -0.16817069 | -3.59325616 | -1.17467123 |
| C  | 1.10437931  | -3.70683431 | -1.76127672 |
| H  | 1.32777769  | -4.66478823 | -2.22334072 |
| C  | 2.04107878  | -2.69054348 | -2.00481084 |
| C  | 3.15248969  | -3.03485515 | -2.98080239 |
| H  | 2.74451053  | -3.62507049 | -3.80872644 |
| H  | 3.63892769  | -2.14236636 | -3.38207715 |
| H  | 3.91292505  | -3.64619182 | -2.47864245 |
| C  | -1.19134077 | 1.47850775  | 0.84440127  |
| C  | 1.83357597  | -0.13141837 | 4.04018136  |
| C  | 1.80588881  | 1.00413657  | 5.08753348  |
| H  | 2.64366395  | 1.70060308  | 4.97550218  |
| H  | 0.86741468  | 1.57038015  | 5.03796088  |
| H  | 1.88325615  | 0.55322985  | 6.08881601  |
| C  | 0.74889525  | -1.15928140 | 4.43193409  |
| H  | 0.65668901  | -1.94700982 | 3.67955773  |
| H  | 1.05232627  | -1.62253242 | 5.38388678  |
| H  | -0.22931882 | -0.68839592 | 4.57557082  |
| C  | 2.57823518  | 2.13030530  | 1.99880361  |
| C  | 2.62611224  | 2.31377020  | 0.46947123  |
| H  | 1.62801707  | 2.37504980  | 0.03150915  |
| H  | 3.16168021  | 3.24414728  | 0.22737325  |
| H  | 3.16155782  | 1.48270265  | -0.00134963 |
| C  | 4.03097741  | 1.96841466  | 2.49083913  |
| H  | 4.10425338  | 1.90023115  | 3.58135250  |
| H  | 4.52558484  | 1.10113325  | 2.04557832  |
| H  | 4.58957598  | 2.86452621  | 2.17791167  |
| Cl | 1.69683814  | -2.77852443 | 1.44837875  |

|    |             |             |             |
|----|-------------|-------------|-------------|
| N  | -0.60592369 | -2.46833749 | -0.56714973 |
| N  | 1.94633097  | -1.45757910 | -1.46269132 |
| O  | -0.22936011 | 0.35421893  | -0.25509537 |
| P  | -0.66284688 | 0.95369913  | 2.53395542  |
| P  | 1.46871950  | 0.55493186  | 2.26749611  |
| Ti | 0.73398500  | -1.04305160 | 0.13749350  |
| C  | 1.97074324  | 3.37686723  | 2.66643762  |
| H  | 2.01664169  | 3.32182134  | 3.75875804  |
| H  | 2.54094448  | 4.26219051  | 2.34335937  |
| H  | 0.92864292  | 3.51771495  | 2.37441077  |
| C  | 3.19132553  | -0.86553867 | 4.09117338  |
| H  | 3.17854445  | -1.74360295 | 3.43847109  |
| H  | 4.03598602  | -0.22851226 | 3.81545602  |
| H  | 3.35513409  | -1.20764571 | 5.12473140  |
| C  | -0.79159602 | 2.82654760  | 0.29547155  |
| C  | -0.98090187 | 3.95082554  | 1.11716028  |
| C  | -0.42539950 | 3.04637527  | -1.04592749 |
| C  | -0.77628710 | 5.25446446  | 0.64363080  |
| H  | -1.30505573 | 3.79762964  | 2.14545666  |
| C  | -0.21238589 | 4.33633429  | -1.53397557 |
| H  | -0.30097957 | 2.18659402  | -1.69522467 |
| C  | -0.37916001 | 5.44875846  | -0.68960580 |
| H  | -0.92681202 | 6.09309056  | 1.31799233  |
| H  | 0.07891451  | 4.50814700  | -2.56745275 |
| C  | -2.65513932 | 1.22404666  | 0.61303913  |
| C  | -3.40980596 | 2.01817697  | -0.27780241 |
| C  | -3.36061342 | 0.25847478  | 1.37067649  |
| C  | -4.79333307 | 1.86287486  | -0.41963561 |
| H  | -2.91818636 | 2.78983180  | -0.86350229 |
| C  | -4.73984173 | 0.13011990  | 1.28466942  |
| H  | -2.80731808 | -0.37978967 | 2.05189428  |
| C  | -5.46640050 | 0.91971413  | 0.37469678  |
| H  | -5.32734461 | 2.49103924  | -1.12752916 |
| H  | -5.27175462 | -0.60054984 | 1.88746339  |
| O  | -0.13652452 | 6.67683016  | -1.26139625 |
| O  | -6.81888178 | 0.68663210  | 0.32960758  |
| C  | -0.29479049 | 7.83076280  | -0.42597879 |
| H  | 0.39401824  | 7.79440812  | 0.43032735  |
| H  | -0.05125879 | 8.68497399  | -1.06203914 |
| H  | -1.32992474 | 7.91777395  | -0.06527411 |
| C  | -7.59163765 | 1.46419166  | -0.59524303 |
| H  | -7.25928421 | 1.28975553  | -1.62867772 |
| H  | -8.62147158 | 1.12081095  | -0.47301819 |
| H  | -7.52475999 | 2.53577255  | -0.35995335 |

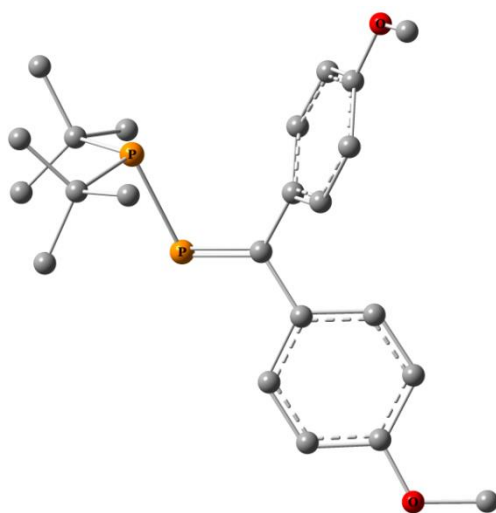

**Figure S190.** Optimized structure of **3e**.

Below are presented xyz coordinates for optimized geometry of **3e**:

|   |             |             |             |
|---|-------------|-------------|-------------|
| C | 0.67517900  | -0.34372500 | -0.26478100 |
| C | 2.07967800  | -0.77813600 | -0.10231900 |
| C | 2.42059100  | -1.97881400 | 0.57283800  |
| H | 1.62771900  | -2.56025500 | 1.03954900  |
| C | 3.73992000  | -2.40708800 | 0.67220800  |
| H | 3.99835700  | -3.31967300 | 1.20420400  |
| C | 4.77442100  | -1.64035200 | 0.09987200  |
| C | 4.46911500  | -0.43753200 | -0.56384000 |
| H | 5.24932900  | 0.16938600  | -1.01483100 |
| C | 3.13744200  | -0.01834700 | -0.65171900 |
| H | 2.90738200  | 0.90463500  | -1.17958400 |
| C | 7.12801600  | -1.38188800 | -0.29460300 |
| H | 7.02604600  | -1.28583000 | -1.38458000 |
| H | 8.02836800  | -1.95148000 | -0.05472200 |
| H | 7.18277100  | -0.38476500 | 0.16435600  |
| C | 0.44554000  | 1.11804400  | -0.31665600 |
| C | 1.01636900  | 1.96167300  | 0.65726600  |
| H | 1.63121300  | 1.52444800  | 1.44216000  |
| C | 0.78653500  | 3.34329700  | 0.66040500  |
| H | 1.22449800  | 3.95568300  | 1.44373400  |
| C | -0.00435100 | 3.91126900  | -0.35445800 |
| C | -0.55480300 | 3.09095200  | -1.35840200 |
| H | -1.14717400 | 3.55203500  | -2.14506200 |
| C | -0.34140600 | 1.71650000  | -1.32829100 |
| H | -0.76675400 | 1.08679100  | -2.10530800 |
| C | 0.25643400  | 6.12251200  | 0.54097500  |
| H | -0.11585300 | 5.85433600  | 1.53983200  |
| H | -0.08990800 | 7.12283900  | 0.27214400  |
| H | 1.35530900  | 6.09327700  | 0.53342100  |
| C | -3.57325000 | -1.65618100 | -1.20112500 |
| C | -2.95354300 | -1.64574200 | -2.61918100 |
| H | -3.62604100 | -2.16966800 | -3.31534400 |
| H | -1.97915200 | -2.15169300 | -2.64090400 |
| H | -2.81636900 | -0.61913300 | -2.98625700 |
| C | -4.97549300 | -1.01137400 | -1.29791700 |
| H | -5.59054000 | -1.58198800 | -2.01090900 |
| H | -4.90891400 | 0.02462000  | -1.65435600 |
| H | -5.49811200 | -1.00818400 | -0.33540200 |
| C | -3.69714500 | -3.10983500 | -0.71024700 |
| H | -4.23797400 | -3.16726700 | 0.24209300  |
| H | -2.71337000 | -3.57885100 | -0.58222700 |
| H | -4.26279900 | -3.70122200 | -1.44759800 |
| C | -2.75200700 | -0.77748200 | 1.72279600  |
| C | -2.33405200 | -2.14440900 | 2.29872700  |
| H | -1.27113300 | -2.34657100 | 2.11284900  |
| H | -2.91506500 | -2.97034300 | 1.87691100  |
| H | -2.49210800 | -2.14026100 | 3.38886400  |
| C | -1.88857100 | 0.31939800  | 2.39001900  |
| H | -2.03927200 | 0.29109600  | 3.48029500  |
| H | -2.15396100 | 1.31948400  | 2.02498000  |
| H | -0.82177600 | 0.15712600  | 2.19020600  |
| C | -4.23686100 | -0.51129800 | 2.04080500  |
| H | -4.36797600 | -0.43846500 | 3.13156400  |
| H | -4.87819500 | -1.32666400 | 1.68444900  |
| H | -4.58507700 | 0.42895400  | 1.59280000  |
| O | 6.04188100  | -2.14073300 | 0.25673800  |
| O | -0.28720800 | 5.25120300  | -0.46001400 |
| P | -0.52429700 | -1.58908800 | -0.39861900 |
| P | -2.45552900 | -0.48523200 | -0.16373800 |



### E.3.8. Reaction of **1** with *tert*-butyl phenyl ketone leading to **Z-3f**

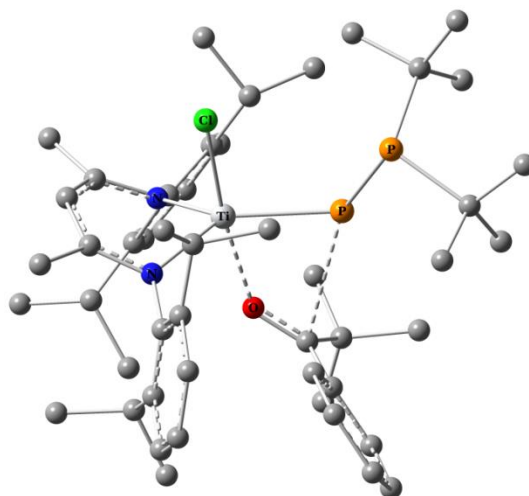

**Figure S191.** Optimized structure of **Z-3f**<sub>TS1</sub>.

Below are presented xyz coordinates for optimized geometry of **Z-3f**<sub>TS1</sub>:

|   |             |             |             |
|---|-------------|-------------|-------------|
| C | -2.63003400 | -2.22985400 | -0.16124500 |
| C | -2.02580300 | -3.50164100 | 0.00713400  |
| C | -2.68534000 | -4.44397000 | 0.81394900  |
| H | -2.24011900 | -5.42518600 | 0.95740700  |
| C | -3.89853800 | -4.14569500 | 1.44316800  |
| H | -4.39082100 | -4.89333800 | 2.06300200  |
| C | -4.46641600 | -2.87979000 | 1.28313000  |
| H | -5.39865000 | -2.63994800 | 1.79299100  |
| C | -3.84962100 | -1.90055400 | 0.48542800  |
| C | -0.70164500 | -3.84011400 | -0.66223300 |
| H | -0.06933400 | -2.93322900 | -0.60108400 |
| C | 0.06637200  | -4.95857900 | 0.06420800  |
| H | 1.06755000  | -5.05782100 | -0.36680900 |
| H | 0.17592300  | -4.73785300 | 1.13348300  |
| H | -0.43608800 | -5.93027200 | -0.04231600 |
| C | -0.87914600 | -4.18417400 | -2.15685600 |
| H | 0.08792100  | -4.46077700 | -2.59441400 |
| H | -1.57234300 | -5.02836000 | -2.27914700 |
| H | -1.25935100 | -3.32626300 | -2.72090200 |
| C | -4.47483100 | -0.50873200 | 0.41994500  |
| H | -3.92876300 | 0.08974400  | -0.31855900 |
| C | -4.31572500 | 0.18631900  | 1.78884600  |
| H | -4.80234200 | 1.16967600  | 1.78301400  |
| H | -4.77233000 | -0.41511800 | 2.58626500  |
| H | -3.25472400 | 0.32209500  | 2.01903600  |
| C | -5.96424200 | -0.53605100 | 0.01292600  |
| H | -6.12377800 | -1.07239000 | -0.93048400 |
| H | -6.57880200 | -1.02412100 | 0.78105700  |
| H | -6.33625000 | 0.48967600  | -0.10949300 |
| C | -0.55750100 | 2.87109200  | -1.19180700 |
| C | -1.28056800 | 3.59637200  | -0.21350500 |
| C | -0.89587600 | 4.92222600  | 0.04734200  |
| H | -1.43796100 | 5.49722800  | 0.79506300  |
| C | 0.17924000  | 5.51046600  | -0.62569100 |
| H | 0.46421000  | 6.53850100  | -0.40692300 |
| C | 0.89403700  | 4.76998900  | -1.57252800 |
| H | 1.73569200  | 5.22764300  | -2.08966400 |
| C | 0.54034600  | 3.44419600  | -1.87943600 |
| C | -2.46408300 | 2.97255800  | 0.51596500  |
| H | -2.30330600 | 1.88782500  | 0.51306000  |
| C | -2.55956100 | 3.44083300  | 1.98207300  |
| H | -3.31007900 | 2.84612800  | 2.51692500  |
| H | -1.59837300 | 3.32909300  | 2.49682600  |

|    |             |             |             |
|----|-------------|-------------|-------------|
| H  | -2.86750800 | 4.49307900  | 2.05260000  |
| C  | -3.78550400 | 3.26756100  | -0.23212200 |
| H  | -4.64159000 | 2.86596900  | 0.32575700  |
| H  | -3.93028900 | 4.35068700  | -0.34612300 |
| H  | -3.79232900 | 2.81255800  | -1.22956700 |
| C  | 1.34993700  | 2.64650500  | -2.89325500 |
| H  | 0.74014900  | 1.79846100  | -3.22713600 |
| C  | 2.59621700  | 2.05783500  | -2.20354700 |
| H  | 3.16239400  | 1.41727800  | -2.88948800 |
| H  | 3.25114100  | 2.86124900  | -1.83819900 |
| H  | 2.31620800  | 1.42881100  | -1.34790500 |
| C  | 1.74293900  | 3.46417400  | -4.13970200 |
| H  | 2.21076400  | 2.80272700  | -4.87980800 |
| H  | 0.86997000  | 3.94174800  | -4.60509900 |
| H  | 2.46879800  | 4.25215600  | -3.89762000 |
| C  | -3.70597700 | -1.94123500 | -2.69405800 |
| H  | -3.75069000 | -1.87131100 | -3.78624900 |
| H  | -3.48075200 | -2.96983700 | -2.39924100 |
| H  | -4.69963800 | -1.69550400 | -2.29958800 |
| C  | -2.66581000 | -0.96893100 | -2.16454900 |
| C  | -2.48855300 | 0.21206500  | -2.91039600 |
| H  | -3.04739100 | 0.24885900  | -3.84187800 |
| C  | -1.81691000 | 1.40649700  | -2.57295600 |
| C  | -2.06718000 | 2.60020500  | -3.47703900 |
| H  | -2.88560200 | 2.39015300  | -4.17161000 |
| H  | -2.30656000 | 3.49698400  | -2.89512700 |
| H  | -1.16350100 | 2.82739600  | -4.05754000 |
| C  | -0.17327200 | 0.35050400  | 2.30754600  |
| C  | 3.91207700  | -2.97939300 | -0.82540500 |
| C  | 3.80830500  | -3.79902100 | 0.47194900  |
| H  | 4.63985100  | -3.57915000 | 1.15311500  |
| H  | 2.86543400  | -3.58732100 | 0.99326700  |
| H  | 3.84365200  | -4.87653600 | 0.24099000  |
| C  | 2.81559100  | -3.42484600 | -1.81478900 |
| H  | 2.91652600  | -2.90732500 | -2.77661000 |
| H  | 2.89744800  | -4.50928600 | -1.99154400 |
| H  | 1.81916400  | -3.20023200 | -1.42249400 |
| C  | 4.76479200  | -0.40052000 | 0.77147800  |
| C  | 4.62293600  | 1.13246200  | 0.63441400  |
| H  | 3.58138600  | 1.43921000  | 0.78856100  |
| H  | 5.24088200  | 1.63223100  | 1.39758700  |
| H  | 4.94538000  | 1.47670100  | -0.35650800 |
| C  | 6.23090200  | -0.78394200 | 0.48895800  |
| H  | 6.43147500  | -1.83119500 | 0.74493500  |
| H  | 6.50117800  | -0.62175300 | -0.56320300 |
| H  | 6.89269100  | -0.15997000 | 1.11043000  |
| Cl | 0.63654500  | -0.89112100 | -2.87848800 |
| N  | -2.01135100 | -1.24183500 | -1.00556000 |
| N  | -0.98574600 | 1.52579900  | -1.51060400 |
| O  | -0.74622100 | 0.22911800  | 1.17860500  |
| P  | 1.66710700  | -0.94553600 | 0.42552400  |
| P  | 3.60688500  | -1.08493500 | -0.62536400 |
| Ti | -0.19182600 | -0.29770300 | -0.86974700 |
| C  | 4.40320600  | -0.78559700 | 2.21873200  |
| H  | 4.42647100  | -1.86905900 | 2.37938900  |
| H  | 5.12529500  | -0.32119600 | 2.91045600  |
| H  | 3.40029700  | -0.42270900 | 2.47210900  |
| C  | 5.27291800  | -3.23043100 | -1.51435900 |
| H  | 5.39580700  | -2.58299400 | -2.39293200 |
| H  | 6.12269200  | -3.06884600 | -0.84454000 |
| H  | 5.31315100  | -4.27731800 | -1.85509300 |
| C  | 0.59978900  | 1.59009700  | 2.58486300  |
| C  | 1.13569000  | 2.30240000  | 1.49003500  |
| C  | 0.81193500  | 2.11097400  | 3.88303200  |
| C  | 1.85911600  | 3.47951200  | 1.67343800  |
| H  | 1.02639100  | 1.87926100  | 0.49904000  |
| C  | 1.51698800  | 3.30530600  | 4.06813000  |
| H  | 0.41210700  | 1.60654200  | 4.75449700  |

|   |             |             |            |
|---|-------------|-------------|------------|
| C | 2.04750000  | 3.99135100  | 2.96598700 |
| H | 2.27328600  | 3.98976100  | 0.80810700 |
| H | 1.65470000  | 3.69511900  | 5.07491800 |
| H | 2.60837300  | 4.91271200  | 3.11400100 |
| C | -0.40245700 | -0.72868700 | 3.38324800 |
| C | 0.92244600  | -1.11076100 | 4.09243200 |
| H | 1.61023900  | -1.54913800 | 3.36103300 |
| H | 1.42320700  | -0.26300200 | 4.56938700 |
| H | 0.69795000  | -1.85887000 | 4.86476400 |
| C | -0.96373500 | -1.99899500 | 2.72263500 |
| H | -1.03653000 | -2.79178800 | 3.47824200 |
| H | -1.95846300 | -1.83002900 | 2.30386400 |
| H | -0.29566600 | -2.33260500 | 1.92022500 |
| C | -1.46012700 | -0.23925700 | 4.42103500 |
| H | -1.70883000 | -1.08833800 | 5.07082800 |
| H | -1.10775900 | 0.57790000  | 5.05735800 |
| H | -2.37970100 | 0.08533200  | 3.92263900 |

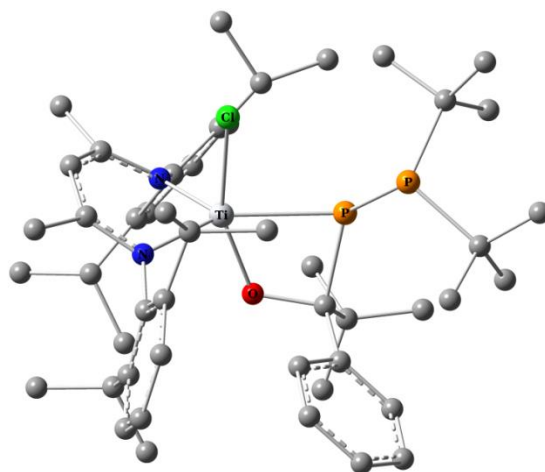

**Figure S192.** Optimized structure of **Z-3fi**.

Below are presented xyz coordinates for optimized geometry of **Z-3fi**

|   |             |             |             |
|---|-------------|-------------|-------------|
| C | -2.83337100 | -2.11862300 | -0.01734700 |
| C | -2.28363500 | -3.41838100 | -0.14920400 |
| C | -2.84531600 | -4.44745700 | 0.62551800  |
| H | -2.44447800 | -5.45454700 | 0.54349000  |
| C | -3.89963100 | -4.20255300 | 1.51211400  |
| H | -4.31562800 | -5.01743000 | 2.10240000  |
| C | -4.39982300 | -2.90629600 | 1.65294500  |
| H | -5.19838500 | -2.71132700 | 2.36750400  |
| C | -3.88045400 | -1.84207200 | 0.89613400  |
| C | -1.10793600 | -3.69195600 | -1.08067500 |
| H | -0.43761800 | -2.81958900 | -1.00761900 |
| C | -0.28834200 | -4.92364800 | -0.65395400 |
| H | 0.61834200  | -4.99271200 | -1.26411400 |
| H | 0.01364700  | -4.85901400 | 0.39902500  |
| H | -0.85260800 | -5.85556200 | -0.79817000 |
| C | -1.53074900 | -3.81309000 | -2.56040500 |
| H | -0.65349300 | -4.04940200 | -3.17587600 |
| H | -2.27452700 | -4.61193500 | -2.69007200 |
| H | -1.94522400 | -2.87206800 | -2.93563100 |
| C | -4.40039700 | -0.42887000 | 1.14657500  |
| H | -3.96293000 | 0.24247500  | 0.39791500  |
| C | -3.92698700 | 0.04978100  | 2.53689700  |
| H | -4.33069300 | 1.04586600  | 2.75793300  |
| H | -4.26908100 | -0.63767700 | 3.32187400  |
| H | -2.83381300 | 0.09982700  | 2.57399900  |
| C | -5.93711500 | -0.32796900 | 1.03881500  |
| H | -6.30451300 | -0.69910200 | 0.07381200  |

|    |             |             |             |
|----|-------------|-------------|-------------|
| H  | -6.43263500 | -0.90613900 | 1.83003700  |
| H  | -6.25100200 | 0.71880800  | 1.14439200  |
| C  | -0.80473400 | 3.04950500  | -0.86799800 |
| C  | -1.33847900 | 3.69456400  | 0.27180900  |
| C  | -0.91776500 | 5.00698800  | 0.54647300  |
| H  | -1.32623000 | 5.52794800  | 1.41020500  |
| C  | 0.02457500  | 5.64811900  | -0.26374900 |
| H  | 0.33556600  | 6.66707400  | -0.03815400 |
| C  | 0.59039100  | 4.96568400  | -1.34620300 |
| H  | 1.35004500  | 5.45557300  | -1.95235400 |
| C  | 0.19292100  | 3.65650800  | -1.67052400 |
| C  | -2.34565100 | 2.99504700  | 1.17518900  |
| H  | -2.25967100 | 1.91936500  | 0.98113600  |
| C  | -2.02558100 | 3.22528200  | 2.66591900  |
| H  | -2.69174000 | 2.61927900  | 3.29164400  |
| H  | -0.98998600 | 2.94073900  | 2.88525600  |
| H  | -2.16638500 | 4.27524700  | 2.95613400  |
| C  | -3.78636800 | 3.43531600  | 0.83054700  |
| H  | -4.51086000 | 2.94011900  | 1.49031100  |
| H  | -3.89997700 | 4.52127700  | 0.95251500  |
| H  | -4.04193700 | 3.17929700  | -0.20571200 |
| C  | 0.86697800  | 2.90000800  | -2.80785600 |
| H  | 0.19923100  | 2.09018900  | -3.12672100 |
| C  | 2.15674000  | 2.23280900  | -2.28217500 |
| H  | 2.64257600  | 1.64955000  | -3.07284900 |
| H  | 2.85987800  | 2.98862000  | -1.90578300 |
| H  | 1.94385200  | 1.53308500  | -1.46385900 |
| C  | 1.16671900  | 3.77893800  | -4.03789100 |
| H  | 1.53100700  | 3.14843500  | -4.85865700 |
| H  | 0.27111100  | 4.31276900  | -4.38400800 |
| H  | 1.94438800  | 4.52538400  | -3.82684900 |
| C  | -4.30501200 | -1.53340000 | -2.27536600 |
| H  | -4.57518700 | -1.32268800 | -3.31520600 |
| H  | -4.06701600 | -2.59483800 | -2.16292900 |
| H  | -5.18134500 | -1.32754500 | -1.64761300 |
| C  | -3.14311400 | -0.65050600 | -1.85622700 |
| C  | -3.02616300 | 0.58229200  | -2.52718100 |
| H  | -3.71140100 | 0.71480400  | -3.35975000 |
| C  | -2.27976000 | 1.72775300  | -2.18344000 |
| C  | -2.62038000 | 3.00657400  | -2.92572800 |
| H  | -3.49215000 | 2.85477600  | -3.56825500 |
| H  | -2.82641300 | 3.82246200  | -2.22288300 |
| H  | -1.77431500 | 3.32702600  | -3.54659300 |
| C  | 0.84154300  | -0.26072700 | 1.79014900  |
| C  | 3.69313700  | -2.77458500 | -1.43681900 |
| C  | 3.79762300  | -3.81401300 | -0.30836200 |
| H  | 4.71972600  | -3.69222500 | 0.27318800  |
| H  | 2.93842800  | -3.73560800 | 0.37127600  |
| H  | 3.80595400  | -4.82923000 | -0.73651800 |
| C  | 2.46219900  | -3.08565900 | -2.31523300 |
| H  | 2.39394300  | -2.39557900 | -3.16369100 |
| H  | 2.54979800  | -4.11277400 | -2.70296900 |
| H  | 1.52936600  | -3.00798300 | -1.74750300 |
| C  | 4.80325200  | -0.52607200 | 0.43843000  |
| C  | 4.77691800  | 1.01694900  | 0.52842700  |
| H  | 3.79814800  | 1.39075400  | 0.83864400  |
| H  | 5.51849800  | 1.35429100  | 1.26827800  |
| H  | 5.02297800  | 1.46760000  | -0.44177700 |
| C  | 6.19468500  | -0.93962800 | -0.08606500 |
| H  | 6.35026800  | -2.02278900 | -0.02665100 |
| H  | 6.36152800  | -0.61224000 | -1.12039300 |
| H  | 6.95750500  | -0.45972600 | 0.54638400  |
| Cl | 0.18228200  | -0.58514600 | -2.82423300 |
| N  | -2.34009900 | -1.03557600 | -0.83427200 |
| N  | -1.32506500 | 1.74450600  | -1.22315900 |
| O  | -0.39587400 | 0.14889500  | 1.14530800  |
| P  | 1.46893100  | -1.22593300 | 0.19321000  |
| P  | 3.45164300  | -0.94097200 | -0.86469500 |

|    |             |             |             |
|----|-------------|-------------|-------------|
| Ti | -0.53679100 | -0.08806500 | -0.69804400 |
| C  | 4.58978900  | -1.13436300 | 1.83103900  |
| H  | 4.60208600  | -2.22898500 | 1.80949100  |
| H  | 5.38710300  | -0.79333200 | 2.51116800  |
| H  | 3.63526600  | -0.80994000 | 2.24687800  |
| C  | 4.92474500  | -2.85621800 | -2.37114400 |
| H  | 4.91571700  | -2.04340600 | -3.10973600 |
| H  | 5.87512500  | -2.82529900 | -1.83185100 |
| H  | 4.88534600  | -3.81021100 | -2.91921400 |
| C  | 1.60917100  | 0.99750200  | 2.17717300  |
| C  | 1.49072600  | 2.13067100  | 1.35385500  |
| C  | 2.44793900  | 1.11200100  | 3.30499600  |
| C  | 2.16085200  | 3.32591800  | 1.62878800  |
| H  | 0.85833500  | 2.07951200  | 0.47713800  |
| C  | 3.12864700  | 2.30463200  | 3.58823400  |
| H  | 2.58572600  | 0.27581400  | 3.97995400  |
| C  | 2.98786100  | 3.42224200  | 2.75637000  |
| H  | 2.03229300  | 4.17034300  | 0.95680100  |
| H  | 3.76971300  | 2.35217500  | 4.46728000  |
| H  | 3.51630800  | 4.34764200  | 2.97872400  |
| C  | 0.45859700  | -1.24550700 | 2.96844800  |
| C  | 1.64775900  | -2.10666500 | 3.44994500  |
| H  | 2.07828400  | -2.65745800 | 2.60282900  |
| H  | 2.45148400  | -1.54518800 | 3.93521100  |
| H  | 1.27530400  | -2.83924400 | 4.17881400  |
| C  | -0.60083400 | -2.24852100 | 2.46706100  |
| H  | -0.81772000 | -2.97360300 | 3.26235500  |
| H  | -1.53254600 | -1.74970600 | 2.19588600  |
| H  | -0.23385400 | -2.79788800 | 1.59247200  |
| C  | -0.17659200 | -0.44843900 | 4.13483800  |
| H  | -0.63804700 | -1.14884600 | 4.84445900  |
| H  | 0.54708900  | 0.16340900  | 4.68251600  |
| H  | -0.95987000 | 0.21691900  | 3.75252600  |

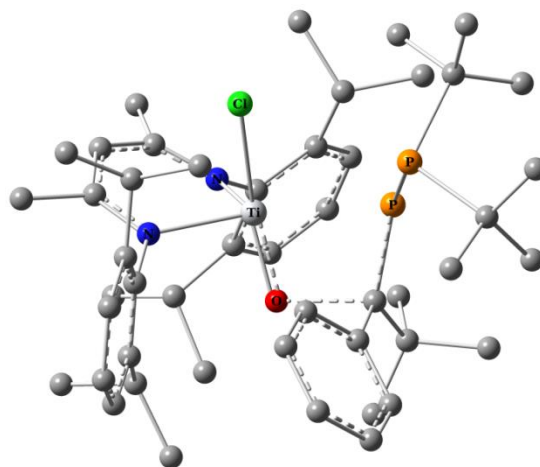

**Figure S193.** Optimized structure of **Z-3firs2**.

Below are presented xyz coordinates for optimized geometry of **Z-3firs2**:

|   |             |             |             |
|---|-------------|-------------|-------------|
| C | -2.75071500 | -2.19933600 | -0.12513000 |
| C | -2.14363200 | -3.46765200 | -0.31369800 |
| C | -2.66253500 | -4.55402900 | 0.41130500  |
| H | -2.22084500 | -5.53941000 | 0.28459900  |
| C | -3.72748900 | -4.39216100 | 1.30502400  |
| H | -4.11040500 | -5.24997500 | 1.85571600  |
| C | -4.28086100 | -3.12515400 | 1.50635800  |
| H | -5.08844300 | -2.99755100 | 2.22625600  |
| C | -3.80416600 | -2.00650600 | 0.80183300  |
| C | -0.95265700 | -3.64817300 | -1.25078300 |
| H | -0.33846800 | -2.73888500 | -1.15620200 |

|   |             |             |             |
|---|-------------|-------------|-------------|
| C | -0.05944800 | -4.83605000 | -0.84940300 |
| H | 0.85818000  | -4.82410400 | -1.44775000 |
| H | 0.22454500  | -4.78448200 | 0.20901200  |
| H | -0.55839300 | -5.79826100 | -1.03106000 |
| C | -1.35234100 | -3.75219100 | -2.73860100 |
| H | -0.46268800 | -3.97372200 | -3.34184100 |
| H | -2.08689100 | -4.55464200 | -2.89515700 |
| H | -1.76590300 | -2.80746100 | -3.10489600 |
| C | -4.37936500 | -0.62623700 | 1.10454000  |
| H | -3.89669900 | 0.09978300  | 0.43908300  |
| C | -4.03605600 | -0.23211000 | 2.55749200  |
| H | -4.45378100 | 0.75451700  | 2.79427100  |
| H | -4.45387500 | -0.95636700 | 3.26960300  |
| H | -2.95123200 | -0.19447500 | 2.69736000  |
| C | -5.90455400 | -0.55315900 | 0.87657500  |
| H | -6.17839400 | -0.82835700 | -0.14927500 |
| H | -6.44089300 | -1.22570800 | 1.55955000  |
| H | -6.26188000 | 0.46846000  | 1.06141500  |
| C | -0.89721700 | 3.00281400  | -0.66426800 |
| C | -1.34099200 | 3.52163400  | 0.57868000  |
| C | -0.84985900 | 4.76882700  | 0.99769600  |
| H | -1.18383700 | 5.17998400  | 1.94777900  |
| C | 0.04989200  | 5.49565200  | 0.21273200  |
| H | 0.41526600  | 6.46413600  | 0.55128100  |
| C | 0.48094500  | 4.96710500  | -1.00547600 |
| H | 1.18693700  | 5.52941200  | -1.61547000 |
| C | 0.03097900  | 3.71655000  | -1.46953700 |
| C | -2.39074300 | 2.79402900  | 1.40823200  |
| H | -2.30378500 | 1.72713100  | 1.17639300  |
| C | -2.15926800 | 2.96180200  | 2.92184900  |
| H | -2.83565400 | 2.30362800  | 3.48032400  |
| H | -1.12764300 | 2.70189100  | 3.18648700  |
| H | -2.35599400 | 3.98993900  | 3.25607500  |
| C | -3.80689500 | 3.26619600  | 1.00552000  |
| H | -4.56994000 | 2.74611700  | 1.60022300  |
| H | -3.91922700 | 4.34638500  | 1.17288800  |
| H | -4.00646700 | 3.06204900  | -0.05384500 |
| C | 0.56527900  | 3.20494800  | -2.80382100 |
| H | 0.01097900  | 2.30080600  | -3.07685600 |
| C | 2.05360400  | 2.80239700  | -2.68679600 |
| H | 2.42067900  | 2.44829400  | -3.65886300 |
| H | 2.66519200  | 3.66404200  | -2.38133000 |
| H | 2.20494500  | 1.98808000  | -1.97079800 |
| C | 0.40110000  | 4.24848100  | -3.93306200 |
| H | 0.65457900  | 3.79136900  | -4.89847700 |
| H | -0.62333000 | 4.63732100  | -3.99136900 |
| H | 1.07254300  | 5.10563900  | -3.78684700 |
| C | -4.18266200 | -1.62928400 | -2.43162700 |
| H | -4.48202500 | -1.35641300 | -3.44859900 |
| H | -3.85313900 | -2.67189800 | -2.41339400 |
| H | -5.06595200 | -1.55935500 | -1.78436900 |
| C | -3.09832700 | -0.68679200 | -1.94145900 |
| C | -3.04615700 | 0.58188500  | -2.52323900 |
| H | -3.72633500 | 0.73957800  | -3.35646400 |
| C | -2.37387600 | 1.74750200  | -2.06842500 |
| C | -2.81373600 | 3.04610800  | -2.71958100 |
| H | -3.86522900 | 2.97950000  | -3.01760500 |
| H | -2.67683600 | 3.90279800  | -2.05372400 |
| H | -2.21739500 | 3.22462400  | -3.62377400 |
| C | 1.09056600  | -0.47044100 | 1.80132000  |
| C | 3.68407500  | -2.41562200 | -1.69953500 |
| C | 3.89807700  | -3.65915700 | -0.81368400 |
| H | 4.81666700  | -3.60152000 | -0.21976200 |
| H | 3.05263500  | -3.80077900 | -0.12808300 |
| H | 3.97174200  | -4.55217100 | -1.45480000 |
| C | 2.43051200  | -2.64686000 | -2.56889400 |
| H | 2.29539100  | -1.84515700 | -3.30005300 |
| H | 2.55311400  | -3.59992000 | -3.10758500 |

|    |             |             |             |
|----|-------------|-------------|-------------|
| H  | 1.51436900  | -2.70574500 | -1.97405700 |
| C  | 4.86757000  | -0.68023900 | 0.58680600  |
| C  | 5.06163500  | 0.81460300  | 0.92978800  |
| H  | 4.19893400  | 1.23333600  | 1.44697800  |
| H  | 5.93518900  | 0.92056100  | 1.59215300  |
| H  | 5.24121900  | 1.40853500  | 0.02450300  |
| C  | 6.20757800  | -1.14798300 | -0.02255200 |
| H  | 6.24196100  | -2.22538300 | -0.21003000 |
| H  | 6.43884800  | -0.61626500 | -0.95397100 |
| H  | 7.00504500  | -0.91364000 | 0.69953200  |
| Cl | 0.32993500  | -0.16884900 | -2.66026000 |
| N  | -2.30344600 | -1.07118400 | -0.90527000 |
| N  | -1.44303300 | 1.73537900  | -1.10832000 |
| O  | -0.66215100 | 0.24690100  | 1.20588700  |
| P  | 1.55020400  | -1.48952100 | 0.34212100  |
| P  | 3.43045600  | -0.74103100 | -0.73236500 |
| Ti | -0.59115800 | -0.10412000 | -0.48750200 |
| C  | 4.59456900  | -1.46172000 | 1.88047000  |
| H  | 4.38394700  | -2.52042300 | 1.69310000  |
| H  | 5.47102300  | -1.39400800 | 2.54526900  |
| H  | 3.74070300  | -1.03388600 | 2.41234500  |
| C  | 4.85330700  | -2.24419200 | -2.70224300 |
| H  | 4.75548600  | -1.30315200 | -3.25933600 |
| H  | 5.83904200  | -2.27029700 | -2.23324700 |
| H  | 4.81030800  | -3.07142200 | -3.42749000 |
| C  | 1.73335400  | 0.85664500  | 2.02547300  |
| C  | 1.79915200  | 1.76339500  | 0.94489300  |
| C  | 2.29082800  | 1.26635500  | 3.25531200  |
| C  | 2.35568600  | 3.03232100  | 1.08616500  |
| H  | 1.41696600  | 1.46123400  | -0.03074200 |
| C  | 2.86423700  | 2.53740100  | 3.39946000  |
| H  | 2.31011400  | 0.58973600  | 4.10175400  |
| C  | 2.88482000  | 3.43175000  | 2.32243800  |
| H  | 2.37622200  | 3.70244200  | 0.23311800  |
| H  | 3.29623200  | 2.82086400  | 4.35755500  |
| H  | 3.31928100  | 4.42297300  | 2.43773300  |
| C  | 0.49404900  | -1.27522100 | 2.99561700  |
| C  | 1.64921200  | -2.04024800 | 3.70611700  |
| H  | 2.12498400  | -2.74241700 | 3.01171200  |
| H  | 2.42245300  | -1.38221700 | 4.11623700  |
| H  | 1.21351400  | -2.60782100 | 4.53929300  |
| C  | -0.49094800 | -2.35874800 | 2.50232500  |
| H  | -0.78802500 | -2.98197500 | 3.35566900  |
| H  | -1.38742300 | -1.90583400 | 2.07443700  |
| H  | -0.03070700 | -3.00797300 | 1.74824700  |
| C  | -0.26393300 | -0.39040000 | 4.01461500  |
| H  | -0.80455900 | -1.04480700 | 4.71139600  |
| H  | 0.39247400  | 0.25370100  | 4.60658700  |
| H  | -0.98574600 | 0.24136700  | 3.49139900  |

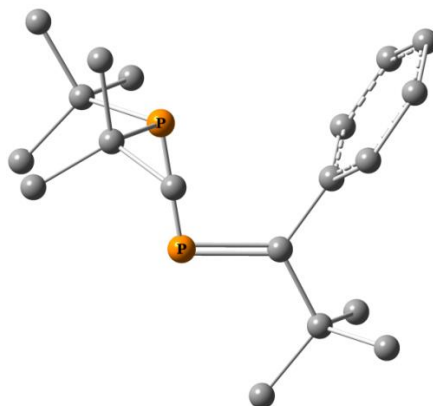

**Figure S194.** Optimized structure of **Z-3f**.

Below are presented xyz coordinates for optimized geometry of **Z-3f**:

|   |             |             |             |
|---|-------------|-------------|-------------|
| C | -1.99480300 | 2.83724900  | -1.25165200 |
| C | -1.82118100 | 1.44804100  | -1.23926400 |
| C | -1.76088000 | 0.74128800  | -0.02182400 |
| C | -1.88164600 | 1.46136900  | 1.18236300  |
| C | -2.05209300 | 2.85146000  | 1.16939400  |
| C | -2.11068800 | 3.54530500  | -0.04714900 |
| H | -2.02973900 | 3.36636600  | -2.20267300 |
| H | -2.13126200 | 3.39171400  | 2.11147900  |
| C | -1.52869400 | -0.73437100 | -0.01681700 |
| P | 0.02755900  | -1.44416900 | -0.03456900 |
| P | 1.37896000  | 0.34857500  | -0.01856900 |
| C | 2.34029700  | -0.04344100 | 1.60707900  |
| C | 1.38402200  | 0.46527900  | 2.71249600  |
| C | 2.68017600  | -1.51867000 | 1.90018300  |
| C | 3.63020200  | 0.80129200  | 1.63718600  |
| H | 1.12881200  | 1.52245200  | 2.56729600  |
| H | 0.45054800  | -0.11397300 | 2.72205800  |
| H | 1.86376400  | 0.35037400  | 3.69651200  |
| H | 3.36091400  | -1.94569000 | 1.15768000  |
| H | 3.16877900  | -1.58638900 | 2.88509500  |
| H | 1.77712500  | -2.14178200 | 1.93177600  |
| H | 4.06147000  | 0.77311000  | 2.64966300  |
| H | 4.38550600  | 0.40900700  | 0.94526600  |
| H | 3.43278700  | 1.85056300  | 1.38023600  |
| C | 2.46883000  | -0.08672300 | -1.54475400 |
| C | 3.39389800  | 1.12340000  | -1.81153400 |
| C | 3.30075300  | -1.37852300 | -1.46400900 |
| C | 1.47712200  | -0.19028100 | -2.72767700 |
| H | 2.81400400  | 2.05192800  | -1.88934800 |
| H | 4.14337700  | 1.25393000  | -1.02354300 |
| H | 3.92931900  | 0.97060900  | -2.76145300 |
| H | 2.67584200  | -2.24780000 | -1.22268200 |
| H | 3.78391100  | -1.56655600 | -2.43591900 |
| H | 4.09498300  | -1.30008600 | -0.71194900 |
| H | 2.03988200  | -0.26222100 | -3.67069500 |
| H | 0.83819200  | -1.07969000 | -2.64457300 |
| H | 0.82872100  | 0.69460100  | -2.78079100 |
| H | -1.71098300 | 0.90181000  | -2.17402300 |
| H | -1.81581600 | 0.92959900  | 2.12917100  |
| H | -2.23857800 | 4.62613400  | -0.05644900 |
| C | -2.78365300 | -1.62911200 | -0.00990500 |
| C | -3.62820200 | -1.31682900 | 1.25363800  |
| H | -3.05208000 | -1.51883100 | 2.16594100  |
| H | -3.95537700 | -0.27103000 | 1.26924600  |
| H | -4.52040500 | -1.95748600 | 1.25978300  |
| C | -3.63524200 | -1.31138400 | -1.26792700 |
| H | -3.06554900 | -1.51445000 | -2.18397500 |
| H | -4.53062200 | -1.94760400 | -1.26958800 |
| H | -3.95607800 | -0.26351400 | -1.28010700 |
| C | -2.44113600 | -3.13230700 | -0.01364700 |
| H | -1.86380200 | -3.41100300 | -0.90438800 |
| H | -1.85584500 | -3.41310200 | 0.87127900  |
| H | -3.37206400 | -3.71532300 | -0.01033800 |



E.3.9. Reaction of **1** with *tert*-butyl phenyl ketone leading to *E*-**3f**

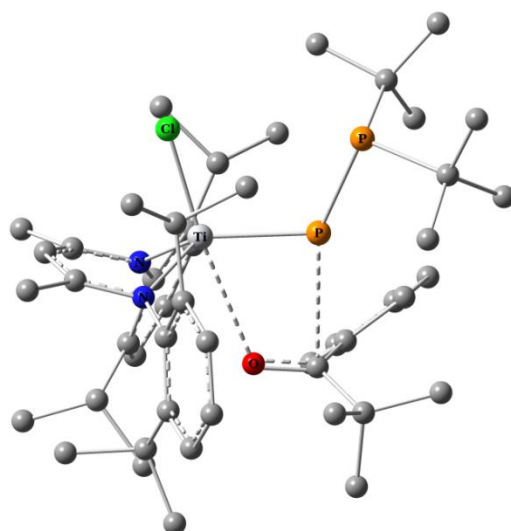

**Figure S195.** Optimized structure of *E*-**3f** TS1.

Below are presented xyz coordinates for optimized geometry of *E*-**3f** TS1:

|   |             |             |             |
|---|-------------|-------------|-------------|
| C | -2.47064154 | -1.56074602 | -1.08415463 |
| C | -1.89284093 | -2.79980985 | -1.45448211 |
| C | -2.64020382 | -3.96736449 | -1.22879791 |
| H | -2.22403446 | -4.93000756 | -1.51406155 |
| C | -3.90614259 | -3.91851450 | -0.63565455 |
| H | -4.47185619 | -4.83613962 | -0.48112377 |
| C | -4.42641824 | -2.69235916 | -0.21455589 |
| H | -5.39444744 | -2.66074817 | 0.28461482  |
| C | -3.72300994 | -1.49291037 | -0.42183983 |
| C | -0.52025798 | -2.86512145 | -2.11353362 |
| H | 0.11388037  | -2.10097722 | -1.62045795 |
| C | 0.17434382  | -4.22185543 | -1.90153177 |
| H | 1.20176698  | -4.16955413 | -2.27588310 |
| H | 0.20388355  | -4.49495843 | -0.84040861 |
| H | -0.33610088 | -5.02119085 | -2.45688894 |
| C | -0.58503472 | -2.53693634 | -3.62155118 |
| H | 0.41529667  | -2.61422374 | -4.06539836 |
| H | -1.24998577 | -3.24560984 | -4.13482318 |
| H | -0.94425528 | -1.51917548 | -3.80228862 |
| C | -4.31172616 | -0.18664205 | 0.10851513  |
| H | -3.64161172 | 0.63248676  | -0.17601340 |
| C | -4.38051012 | -0.21929327 | 1.65205914  |
| H | -4.84559991 | 0.70145361  | 2.02777504  |
| H | -4.98824128 | -1.06624528 | 1.99900236  |
| H | -3.37689221 | -0.30272213 | 2.07983877  |
| C | -5.71875587 | 0.11070027  | -0.45650220 |
| H | -5.73125477 | 0.13925335  | -1.55218802 |
| H | -6.44219945 | -0.65022884 | -0.13429846 |
| H | -6.07068906 | 1.08373451  | -0.08930479 |
| C | -0.32432967 | 3.37248832  | 0.14470188  |
| C | -1.11709235 | 3.64464937  | 1.29130702  |
| C | -0.66699636 | 4.63948507  | 2.17593949  |
| H | -1.24755310 | 4.86176231  | 3.06784612  |
| C | 0.52226346  | 5.33950337  | 1.94404692  |
| H | 0.85900830  | 6.09256140  | 2.65478112  |
| C | 1.26571778  | 5.07776184  | 0.79191804  |
| H | 2.17905512  | 5.63889764  | 0.59976811  |
| C | 0.84888614  | 4.11131300  | -0.14066552 |
| C | -2.42662588 | 2.89928076  | 1.55780404  |
| H | -2.25163562 | 1.84574664  | 1.29964220  |
| C | -2.87223566 | 2.96854493  | 3.03322755  |
| H | -3.71546649 | 2.28639786  | 3.19302234  |

|    |             |             |             |
|----|-------------|-------------|-------------|
| H  | -2.07053898 | 2.68429934  | 3.72416770  |
| H  | -3.21337070 | 3.97850521  | 3.30086935  |
| C  | -3.58442587 | 3.43389308  | 0.67956714  |
| H  | -4.52552866 | 2.94581103  | 0.96669896  |
| H  | -3.70596631 | 4.51655170  | 0.82053023  |
| H  | -3.42475971 | 3.23796188  | -0.38511696 |
| C  | 1.65087737  | 3.91809829  | -1.42314254 |
| H  | 1.08561725  | 3.25355154  | -2.08701332 |
| C  | 2.99712809  | 3.22907895  | -1.13661778 |
| H  | 3.54483846  | 3.04607820  | -2.06927332 |
| H  | 3.61990523  | 3.85149547  | -0.47835637 |
| H  | 2.83699178  | 2.25947365  | -0.65483608 |
| C  | 1.87476562  | 5.25412654  | -2.16699657 |
| H  | 2.33895074  | 5.06157434  | -3.14308372 |
| H  | 0.93442978  | 5.79694213  | -2.32929517 |
| H  | 2.54704285  | 5.91527811  | -1.60400474 |
| C  | -3.41229511 | -0.28936423 | -3.37257628 |
| H  | -3.19432213 | -1.35434776 | -3.49063095 |
| H  | -4.43139693 | -0.20531793 | -2.97773025 |
| H  | -3.38742903 | 0.20413262  | -4.35025004 |
| C  | -2.41638267 | 0.37945535  | -2.44207778 |
| C  | -2.18661405 | 1.75529101  | -2.64812997 |
| H  | -2.67454224 | 2.17694368  | -3.52347409 |
| C  | -1.52723818 | 2.69209963  | -1.82280133 |
| C  | -1.69270471 | 4.15469979  | -2.18463965 |
| H  | -2.59056822 | 4.30194626  | -2.79243537 |
| H  | -1.74724118 | 4.78338656  | -1.29084350 |
| H  | -0.82206502 | 4.48423520  | -2.76717258 |
| C  | -0.42574141 | -0.91190725 | 2.22896645  |
| C  | 3.92171181  | -2.13301860 | -1.29709337 |
| C  | 3.29244414  | -3.24423244 | -0.43839610 |
| H  | 3.78620603  | -3.34783789 | 0.53288235  |
| H  | 2.23039405  | -3.03868728 | -0.26184972 |
| H  | 3.37573018  | -4.20915776 | -0.96422633 |
| C  | 3.20881692  | -2.10589279 | -2.66677449 |
| H  | 3.64197326  | -1.34747523 | -3.33035037 |
| H  | 3.30335665  | -3.09134780 | -3.15014740 |
| H  | 2.14465105  | -1.87546857 | -2.54940628 |
| C  | 4.81277304  | -0.15530356 | 0.95166977  |
| C  | 4.28096268  | 1.06797581  | 1.73061554  |
| H  | 3.27277678  | 0.88521684  | 2.12039585  |
| H  | 4.95012354  | 1.27357573  | 2.58077723  |
| H  | 4.24457996  | 1.96428929  | 1.10036470  |
| C  | 6.24609948  | 0.18572034  | 0.47761454  |
| H  | 6.72233233  | -0.64492996 | -0.05348473 |
| H  | 6.23930768  | 1.05832998  | -0.18828958 |
| H  | 6.87037258  | 0.42593168  | 1.35273700  |
| Cl | 1.00103682  | 0.67698431  | -3.07345660 |
| N  | -1.81399471 | -0.33361700 | -1.45276235 |
| N  | -0.75619348 | 2.33213584  | -0.76611095 |
| O  | -1.13123682 | -0.24598230 | 1.44407574  |
| P  | 1.67633777  | -0.36616472 | 0.25812480  |
| P  | 3.71029817  | -0.33336946 | -0.62866609 |
| Ti | 0.01663622  | 0.46970478  | -1.07175120 |
| C  | 4.84032143  | -1.36578705 | 1.90020392  |
| H  | 5.34526546  | -2.22957943 | 1.45200354  |
| H  | 5.38409402  | -1.10419291 | 2.82220853  |
| H  | 3.82259705  | -1.66533154 | 2.18067982  |
| C  | 5.41632364  | -2.43005917 | -1.53804562 |
| H  | 5.90184844  | -1.62560914 | -2.10656425 |
| H  | 5.96527115  | -2.57689864 | -0.60032968 |
| H  | 5.50636035  | -3.35903838 | -2.12266925 |
| C  | -0.41001809 | -2.41200115 | 2.10938025  |
| C  | 0.76378376  | -3.19130157 | 2.12722668  |
| C  | -1.65697217 | -3.05733449 | 2.01026084  |
| C  | 0.68770360  | -4.58585116 | 2.05069203  |
| H  | 1.73112097  | -2.70044204 | 2.14653730  |
| C  | -1.73262319 | -4.45518561 | 1.97197119  |

|   |             |             |            |
|---|-------------|-------------|------------|
| H | -2.56229516 | -2.45841544 | 1.96403177 |
| C | -0.56169005 | -5.22408221 | 1.98945741 |
| H | 1.60473769  | -5.17256070 | 2.03361579 |
| H | -2.70580805 | -4.93696478 | 1.90724641 |
| H | -0.61884464 | -6.31047684 | 1.94235263 |
| C | 0.13447479  | -0.24568496 | 3.50348707 |
| C | -1.04101391 | -0.37541496 | 4.52095922 |
| H | -1.94076166 | 0.12554310  | 4.14361962 |
| H | -1.27940482 | -1.42814300 | 4.72146206 |
| H | -0.74647130 | 0.09943437  | 5.46645838 |
| C | 0.42856622  | 1.23886562  | 3.23917126 |
| H | 0.68204271  | 1.74358484  | 4.18106669 |
| H | 1.26278137  | 1.34716055  | 2.53776458 |
| H | -0.43559636 | 1.73101675  | 2.79428312 |
| C | 1.38224519  | -0.91908420 | 4.10355834 |
| H | 1.67455180  | -0.36791110 | 5.00780631 |
| H | 1.20014528  | -1.96236792 | 4.38651274 |
| H | 2.21969554  | -0.87900728 | 3.39783267 |

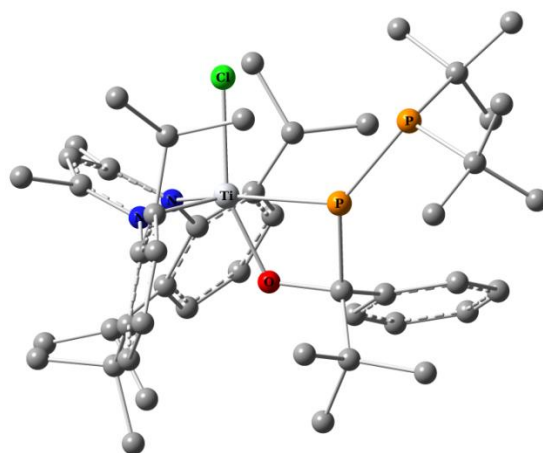

**Figure S196.** Optimized structure of *E-3f1*.

Below are presented xyz coordinates for optimized geometry of *E-3f1*:

|   |             |             |             |
|---|-------------|-------------|-------------|
| C | -2.24298400 | -2.29787700 | -0.84143200 |
| C | -1.30415300 | -3.29182500 | -1.21036400 |
| C | -1.59130200 | -4.62504100 | -0.87667300 |
| H | -0.89248500 | -5.40782100 | -1.15918200 |
| C | -2.74191500 | -4.96290000 | -0.15575300 |
| H | -2.94275700 | -6.00357200 | 0.09406800  |
| C | -3.60782600 | -3.95612800 | 0.27762600  |
| H | -4.47341500 | -4.21427700 | 0.88637800  |
| C | -3.37654900 | -2.60888200 | -0.05171000 |
| C | -0.01809600 | -2.92817200 | -1.94281000 |
| H | 0.34971800  | -1.97134100 | -1.51457200 |
| C | 1.10138200  | -3.96059400 | -1.72410400 |
| H | 2.02927100  | -3.59596500 | -2.17458600 |
| H | 1.27736600  | -4.14211800 | -0.65755500 |
| H | 0.85776100  | -4.91607400 | -2.20888400 |
| C | -0.26028600 | -2.70835200 | -3.45050100 |
| H | 0.67936000  | -2.44326500 | -3.95004400 |
| H | -0.65229000 | -3.63005600 | -3.90265300 |
| H | -0.96817900 | -1.89327200 | -3.62975800 |
| C | -4.28236300 | -1.52948500 | 0.53213300  |
| H | -4.00658200 | -0.56683900 | 0.08572300  |
| C | -4.02357500 | -1.43331800 | 2.05251200  |
| H | -4.66227000 | -0.66330300 | 2.50359000  |
| H | -4.24544600 | -2.38963900 | 2.54476100  |
| H | -2.97573200 | -1.18158100 | 2.24908000  |
| C | -5.78113100 | -1.77539000 | 0.25921600  |
| H | -5.99159700 | -1.87621200 | -0.81281600 |

|    |             |             |             |
|----|-------------|-------------|-------------|
| H  | -6.13359800 | -2.68853500 | 0.75702700  |
| H  | -6.37414900 | -0.93568300 | 0.64487200  |
| C  | -1.43980800 | 3.09043300  | 0.09984200  |
| C  | -2.13406500 | 3.17992700  | 1.33421300  |
| C  | -1.91271300 | 4.31138900  | 2.13635200  |
| H  | -2.43023600 | 4.40155600  | 3.08832300  |
| C  | -1.01658500 | 5.31220900  | 1.74539700  |
| H  | -0.84711300 | 6.17411500  | 2.38889800  |
| C  | -0.33829700 | 5.19879200  | 0.53031300  |
| H  | 0.35937200  | 5.97871100  | 0.22861900  |
| C  | -0.54198500 | 4.10020800  | -0.32435800 |
| C  | -3.08928500 | 2.07534500  | 1.78325700  |
| H  | -2.65499100 | 1.12280000  | 1.44710700  |
| C  | -3.24929400 | 2.01577800  | 3.31510300  |
| H  | -3.79856900 | 1.10991500  | 3.59676300  |
| H  | -2.27777600 | 1.99647700  | 3.82147000  |
| H  | -3.82047600 | 2.87510700  | 3.69277100  |
| C  | -4.48130400 | 2.22623900  | 1.12494800  |
| H  | -5.16538200 | 1.45500300  | 1.50357800  |
| H  | -4.91129000 | 3.20918400  | 1.36057600  |
| H  | -4.43205900 | 2.12222000  | 0.03576500  |
| C  | 0.19704800  | 4.05207600  | -1.65714200 |
| H  | -0.16752400 | 3.18718300  | -2.22327100 |
| C  | 1.71079500  | 3.85000200  | -1.43994600 |
| H  | 2.22328800  | 3.74281600  | -2.40414600 |
| H  | 2.14379900  | 4.70957000  | -0.90788000 |
| H  | 1.89972900  | 2.94382000  | -0.85668800 |
| C  | -0.04859900 | 5.32594800  | -2.49831500 |
| H  | 0.39629000  | 5.20400000  | -3.49453000 |
| H  | -1.11733900 | 5.54470900  | -2.62016700 |
| H  | 0.41682200  | 6.20425200  | -2.03093200 |
| C  | -3.75166100 | -1.42035500 | -3.01012600 |
| H  | -4.07284500 | -0.94872700 | -3.94435700 |
| H  | -3.20894900 | -2.34556800 | -3.23020500 |
| H  | -4.64741500 | -1.69783200 | -2.44100000 |
| C  | -2.88862700 | -0.46009200 | -2.21421400 |
| C  | -3.05491800 | 0.91453500  | -2.46827100 |
| H  | -3.72721400 | 1.15709200  | -3.28685200 |
| C  | -2.59479400 | 2.02185200  | -1.72224200 |
| C  | -3.18306200 | 3.37208800  | -2.07779700 |
| H  | -4.11330800 | 3.24992700  | -2.64042000 |
| H  | -3.37226400 | 3.97243200  | -1.18215800 |
| H  | -2.47083000 | 3.92801000  | -2.70075600 |
| C  | 0.81392100  | -0.57630100 | 1.64477000  |
| C  | 4.30023400  | -1.04775500 | -1.53125600 |
| C  | 4.18045700  | -2.30206300 | -0.65687800 |
| H  | 4.80941600  | -2.24465700 | 0.23828100  |
| H  | 3.14470300  | -2.45193500 | -0.34107000 |
| H  | 4.49496000  | -3.18780000 | -1.23279400 |
| C  | 3.38931200  | -1.20727800 | -2.76855500 |
| H  | 3.49326200  | -0.35847400 | -3.45519500 |
| H  | 3.65973000  | -2.13007600 | -3.30569300 |
| H  | 2.33535800  | -1.26488300 | -2.47634400 |
| C  | 4.93301500  | 1.20771400  | 0.58191100  |
| C  | 4.21334500  | 2.30397000  | 1.39728000  |
| H  | 3.40893300  | 1.89034000  | 2.01263100  |
| H  | 4.94182800  | 2.79448900  | 2.06120800  |
| H  | 3.77516900  | 3.06669500  | 0.74163600  |
| C  | 6.10079400  | 1.89818900  | -0.16767600 |
| H  | 6.70927000  | 1.19448900  | -0.74333900 |
| H  | 5.72418100  | 2.66892400  | -0.85194900 |
| H  | 6.75915800  | 2.38372100  | 0.56925900  |
| Cl | 0.35569500  | 0.63920100  | -2.86689700 |
| N  | -2.04336300 | -0.93823800 | -1.26958100 |
| N  | -1.68386500 | 1.92721000  | -0.72769600 |
| O  | -0.45714400 | -0.34996200 | 0.99616600  |
| P  | 1.72281700  | 0.42250700  | 0.21129900  |
| P  | 3.68552700  | 0.59299300  | -0.74502800 |

|    |             |             |             |
|----|-------------|-------------|-------------|
| Ti | -0.48372300 | 0.27868000  | -0.76439700 |
| C  | 5.48589100  | 0.13144500  | 1.53227500  |
| H  | 6.08219200  | -0.61746000 | 0.99792900  |
| H  | 6.13741700  | 0.60023800  | 2.28685800  |
| H  | 4.67792400  | -0.38602400 | 2.06233800  |
| C  | 5.75530800  | -0.88276300 | -2.01951200 |
| H  | 5.88714000  | 0.03206600  | -2.61182400 |
| H  | 6.47114200  | -0.87258400 | -1.18877700 |
| H  | 6.00806500  | -1.73984300 | -2.66257100 |
| C  | 1.06680300  | -2.06195700 | 1.77581700  |
| C  | 2.36145900  | -2.56062900 | 2.00688300  |
| C  | -0.00926500 | -2.96944700 | 1.77337000  |
| C  | 2.58147200  | -3.92423000 | 2.23255200  |
| H  | 3.20330500  | -1.87417200 | 1.99304800  |
| C  | 0.20672200  | -4.33493700 | 2.00478700  |
| H  | -1.01376600 | -2.59839900 | 1.59420900  |
| C  | 1.50106700  | -4.82013700 | 2.23638700  |
| H  | 3.59565900  | -4.28572100 | 2.39641200  |
| H  | -0.64204200 | -5.01566900 | 1.99518200  |
| H  | 1.66841900  | -5.88174600 | 2.41132700  |
| C  | 0.78843700  | 0.13802800  | 3.05229300  |
| C  | -0.36101900 | -0.46995100 | 3.89007100  |
| H  | -1.32033700 | -0.34371900 | 3.37651700  |
| H  | -0.20240600 | -1.53893000 | 4.07668300  |
| H  | -0.41784100 | 0.04405500  | 4.85950500  |
| C  | 0.52990000  | 1.64575500  | 2.88297000  |
| H  | 0.36735600  | 2.10445900  | 3.86832300  |
| H  | 1.37028200  | 2.15315300  | 2.39805200  |
| H  | -0.35677000 | 1.82138500  | 2.27022600  |
| C  | 2.11340400  | -0.05796100 | 3.81293900  |
| H  | 2.09818300  | 0.55984700  | 4.72113100  |
| H  | 2.26633100  | -1.10108500 | 4.11304000  |
| H  | 2.97093000  | 0.26050200  | 3.20782400  |

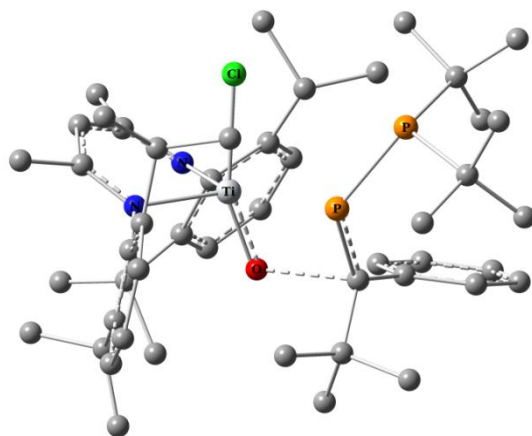

**Figure S197.** Optimized structure of *E*-**3f** TS<sub>2</sub>.

Below are presented xyz coordinates for optimized geometry of *E*-**3f** TS<sub>2</sub>:

|   |             |            |             |
|---|-------------|------------|-------------|
| C | 1.79999200  | 2.70738000 | -0.69893600 |
| C | 0.74532200  | 3.56707400 | -1.10196300 |
| C | 0.77432900  | 4.89802600 | -0.65050100 |
| H | -0.01162200 | 5.58210000 | -0.95976800 |
| C | 1.78442800  | 5.36007400 | 0.20116400  |
| H | 1.78572400  | 6.39707900 | 0.53371600  |
| C | 2.77025700  | 4.47686000 | 0.64522000  |
| H | 3.53101600  | 4.82391200 | 1.34345700  |
| C | 2.79457800  | 3.13953200 | 0.21224900  |
| C | -0.39715400 | 3.06857700 | -1.98355800 |
| H | -0.68674400 | 2.07147700 | -1.60319400 |
| C | -1.64085400 | 3.97249600 | -1.91226700 |

|   |             |             |             |
|---|-------------|-------------|-------------|
| H | -2.46408200 | 3.50168100  | -2.45843100 |
| H | -1.96548100 | 4.13992500  | -0.87862600 |
| H | -1.44987300 | 4.94653800  | -2.38410300 |
| C | 0.02352100  | 2.88462600  | -3.45777100 |
| H | -0.84426800 | 2.57672000  | -4.05423800 |
| H | 0.40768400  | 3.83156900  | -3.86294200 |
| H | 0.78155400  | 2.10465900  | -3.56595900 |
| C | 3.83735800  | 2.19018300  | 0.79101500  |
| H | 3.70472300  | 1.20862000  | 0.32078900  |
| C | 3.58747400  | 2.02555000  | 2.30617900  |
| H | 4.33371300  | 1.35066800  | 2.74383800  |
| H | 3.66401900  | 2.99164100  | 2.82288300  |
| H | 2.58806800  | 1.61413500  | 2.48315200  |
| C | 5.28529800  | 2.66104100  | 0.53580400  |
| H | 5.49370400  | 2.78300500  | -0.53407200 |
| H | 5.48296600  | 3.62259200  | 1.02850300  |
| H | 5.99549200  | 1.92636300  | 0.93763700  |
| C | 2.11286700  | -2.72140600 | 0.01475800  |
| C | 2.76295800  | -2.75868600 | 1.27693600  |
| C | 2.70275800  | -3.94824600 | 2.02030700  |
| H | 3.19187100  | -3.99864600 | 2.99004100  |
| C | 2.00184400  | -5.06302700 | 1.54669300  |
| H | 1.95518000  | -5.97220300 | 2.14433700  |
| C | 1.36010700  | -5.00303700 | 0.30853200  |
| H | 0.81361200  | -5.87128800 | -0.05689800 |
| C | 1.40710400  | -3.84491900 | -0.48923500 |
| C | 3.49784300  | -1.53249700 | 1.81133200  |
| H | 2.90495800  | -0.65507500 | 1.51484700  |
| C | 3.61389900  | -1.52999800 | 3.34758100  |
| H | 4.01728900  | -0.56986800 | 3.68895600  |
| H | 2.63722100  | -1.67636300 | 3.82376000  |
| H | 4.29516400  | -2.31513800 | 3.70373700  |
| C | 4.90221800  | -1.40007900 | 1.17738500  |
| H | 5.42469300  | -0.52748600 | 1.59186800  |
| H | 5.50539300  | -2.29316300 | 1.39032800  |
| H | 4.84524200  | -1.27136100 | 0.09103000  |
| C | 0.72036900  | -3.86442800 | -1.85135800 |
| H | 0.91516600  | -2.91009700 | -2.35374300 |
| C | -0.81022200 | -3.99215300 | -1.70357600 |
| H | -1.29074500 | -3.93074300 | -2.68778800 |
| H | -1.07878600 | -4.95373500 | -1.24208300 |
| H | -1.20966200 | -3.18407500 | -1.08398000 |
| C | 1.25152900  | -5.01463800 | -2.73920800 |
| H | 0.83682100  | -4.92325900 | -3.75163100 |
| H | 2.34631600  | -5.01534200 | -2.81079700 |
| H | 0.94652700  | -5.99197400 | -2.34070800 |
| C | 3.49155600  | 2.28017100  | -2.87054200 |
| H | 3.92218300  | 1.93927500  | -3.81766700 |
| H | 2.79239000  | 3.10053800  | -3.05874500 |
| H | 4.30336700  | 2.68138800  | -2.25103900 |
| C | 2.80920500  | 1.12331800  | -2.16461500 |
| C | 3.25554500  | -0.17468700 | -2.47878200 |
| H | 3.96458900  | -0.24190600 | -3.29971800 |
| C | 3.03965300  | -1.37432700 | -1.77071000 |
| C | 3.87552600  | -2.56614600 | -2.19201800 |
| H | 4.81237900  | -2.23123000 | -2.64817200 |
| H | 4.09569900  | -3.22264300 | -1.34454400 |
| H | 3.32492800  | -3.15435900 | -2.93704900 |
| C | -1.38317500 | 0.08748800  | 1.75770400  |
| C | -4.21855000 | 0.54766800  | -1.61486600 |
| C | -4.14936300 | 1.72496300  | -0.63459800 |
| H | -4.74034100 | 1.53834400  | 0.26730700  |
| H | -3.11687800 | 1.92323300  | -0.33100500 |
| H | -4.54561200 | 2.63192600  | -1.11840600 |
| C | -3.38006100 | 0.86756200  | -2.87193300 |
| H | -3.44786000 | 0.06121100  | -3.61209000 |
| H | -3.75805500 | 1.79497100  | -3.32994800 |
| H | -2.32108300 | 0.99489900  | -2.62895900 |

|    |             |             |             |
|----|-------------|-------------|-------------|
| C  | -4.71214900 | -2.01627500 | 0.18103800  |
| C  | -3.93974200 | -3.19087200 | 0.82755200  |
| H  | -3.17969500 | -2.84410100 | 1.53584100  |
| H  | -4.65468700 | -3.83189000 | 1.36601800  |
| H  | -3.43285700 | -3.79995100 | 0.06841500  |
| C  | -5.79687400 | -2.65353800 | -0.72584100 |
| H  | -6.48663800 | -1.91715600 | -1.14624400 |
| H  | -5.34006600 | -3.21357800 | -1.55190100 |
| H  | -6.39012100 | -3.35762900 | -0.12258200 |
| Cl | -0.15931600 | -0.49931200 | -2.74933200 |
| N  | 1.87761300  | 1.36478700  | -1.22116200 |
| N  | 2.17001200  | -1.49112200 | -0.74527600 |
| O  | 0.66380100  | 0.41483900  | 1.10048200  |
| P  | -1.64304400 | -0.94337100 | 0.26373000  |
| P  | -3.46510100 | -1.09930900 | -0.96775000 |
| Ti | 0.65570500  | -0.14109700 | -0.53003500 |
| C  | -5.37038000 | -1.17200300 | 1.28270100  |
| H  | -5.93584100 | -0.32528100 | 0.87615100  |
| H  | -6.06596700 | -1.79279700 | 1.86970300  |
| H  | -4.61015600 | -0.78148000 | 1.96777900  |
| C  | -5.68045400 | 0.33924800  | -2.06407400 |
| H  | -5.78251700 | -0.50860900 | -2.75288500 |
| H  | -6.36125400 | 0.19527000  | -1.21693800 |
| H  | -6.00522000 | 1.24503100  | -2.59876300 |
| C  | -1.90512000 | 1.47351200  | 1.94682100  |
| C  | -3.20087600 | 1.69737400  | 2.46032900  |
| C  | -1.09702500 | 2.59545100  | 1.66292000  |
| C  | -3.67404200 | 2.99731900  | 2.67534000  |
| H  | -3.85731600 | 0.85785300  | 2.66110200  |
| C  | -1.57599300 | 3.89223200  | 1.88210800  |
| H  | -0.09224100 | 2.43301300  | 1.28899900  |
| C  | -2.86494500 | 4.10438200  | 2.38920200  |
| H  | -4.68324700 | 3.13727300  | 3.05966300  |
| H  | -0.92556100 | 4.73342500  | 1.65087600  |
| H  | -3.23398700 | 5.11459300  | 2.55705800  |
| C  | -0.90778200 | -0.62110300 | 3.04284100  |
| C  | -0.03497700 | 0.29464600  | 3.92918700  |
| H  | 0.90041800  | 0.52850500  | 3.41416600  |
| H  | -0.55068100 | 1.23191000  | 4.16901400  |
| H  | 0.19002700  | -0.22729900 | 4.86895500  |
| C  | -0.17381200 | -1.94387400 | 2.77036800  |
| H  | 0.12469200  | -2.38872100 | 3.72902000  |
| H  | -0.80346100 | -2.66337600 | 2.23426100  |
| H  | 0.72192300  | -1.76741500 | 2.17428800  |
| C  | -2.20442300 | -0.96986800 | 3.84534900  |
| H  | -1.89947100 | -1.60109800 | 4.69000000  |
| H  | -2.69279600 | -0.07582100 | 4.24535100  |
| H  | -2.91797500 | -1.53659500 | 3.23613500  |

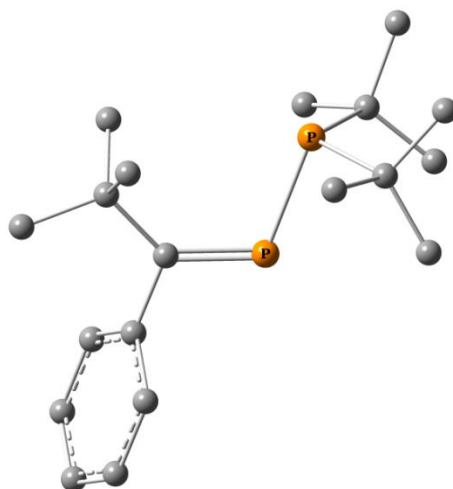

**Figure S198.** Optimized structure of *E-3f*.

Below are presented xyz coordinates for optimized geometry of *E-3f*:

|   |             |             |             |
|---|-------------|-------------|-------------|
| C | 4.31729300  | 1.85781000  | -0.91533200 |
| C | 3.09460000  | 1.51357000  | -0.32184500 |
| C | 2.65917600  | 0.17367600  | -0.29521800 |
| C | 3.47098800  | -0.81154400 | -0.89714800 |
| C | 4.68633600  | -0.46553100 | -1.49798000 |
| C | 5.11787300  | 0.87016300  | -1.50373900 |
| H | 4.63748900  | 2.89833300  | -0.92315100 |
| H | 5.29289200  | -1.23740800 | -1.96885800 |
| C | 1.34733300  | -0.19338600 | 0.34106400  |
| P | 0.04570300  | 0.33421800  | -0.63896400 |
| P | -1.89652700 | -0.21842100 | 0.35719500  |
| C | -2.67420300 | 1.54886800  | 0.43114500  |
| C | -2.05691600 | 2.17022500  | 1.70646200  |
| C | -2.39200200 | 2.50029100  | -0.74986000 |
| C | -4.19721400 | 1.41423300  | 0.63415600  |
| H | -2.27325900 | 1.56467400  | 2.59585100  |
| H | -0.96717700 | 2.26972100  | 1.61329000  |
| H | -2.47629000 | 3.17578200  | 1.86231200  |
| H | -2.80532700 | 2.13266700  | -1.69338800 |
| H | -2.85332900 | 3.47733500  | -0.53674200 |
| H | -1.31578100 | 2.66168800  | -0.89047300 |
| H | -4.61406800 | 2.39466300  | 0.91115000  |
| H | -4.70118500 | 1.08900900  | -0.28388000 |
| H | -4.43793100 | 0.70338000  | 1.43581200  |
| C | -2.68388100 | -1.20806300 | -1.09942900 |
| C | -4.00749600 | -1.81937400 | -0.58444500 |
| C | -2.93540000 | -0.42751600 | -2.40196600 |
| C | -1.70899200 | -2.37291800 | -1.39113900 |
| H | -3.84496000 | -2.39140400 | 0.33796900  |
| H | -4.76752400 | -1.05671000 | -0.38422000 |
| H | -4.41181700 | -2.50338900 | -1.34656800 |
| H | -2.02224200 | 0.06167700  | -2.76370600 |
| H | -3.27984100 | -1.12352200 | -3.18284200 |
| H | -3.71405000 | 0.33357100  | -2.27377300 |
| H | -2.16272800 | -3.04435500 | -2.13561900 |
| H | -0.75357100 | -2.01283400 | -1.79545700 |
| H | -1.50037100 | -2.95964600 | -0.48753900 |
| H | 2.46603900  | 2.27930900  | 0.12873200  |
| H | 3.13197000  | -1.84606600 | -0.91093100 |
| H | 6.06449600  | 1.13716700  | -1.96978300 |
| C | 1.40782000  | -0.93615700 | 1.69760300  |
| C | 2.86210900  | -1.13854400 | 2.18815700  |
| H | 3.43408300  | -1.80290600 | 1.53063200  |
| H | 3.40182500  | -0.18599700 | 2.25747300  |
| H | 2.83426800  | -1.59298000 | 3.18745000  |



|   |             |             |            |
|---|-------------|-------------|------------|
| C | 0.66680100  | -0.09585400 | 2.76953100 |
| H | 0.76176700  | -0.58868500 | 3.74728200 |
| H | 1.10080600  | 0.90946500  | 2.84469500 |
| H | -0.39650900 | -0.00805800 | 2.52751000 |
| C | 0.73137800  | -2.32460700 | 1.57751900 |
| H | 1.20002700  | -2.92147600 | 0.78447000 |
| H | 0.83630600  | -2.86682100 | 2.52777300 |
| H | -0.33527900 | -2.21518100 | 1.35585300 |

### E.3.10. Reaction of **1** with acetone leading to **3g**

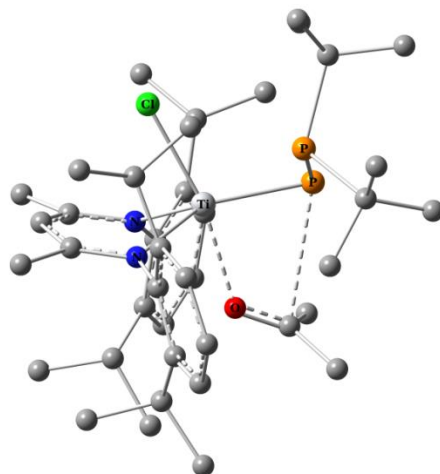

**Figure S199.** Optimized structure of **3gTs1**.

Below are presented xyz coordinates for optimized geometry of **3gTs1**:

|   |             |             |             |
|---|-------------|-------------|-------------|
| C | 3.17002400  | 0.38580500  | -0.30319100 |
| C | 3.57770500  | 1.74453500  | -0.25903200 |
| C | 4.75722400  | 2.05542200  | 0.44401300  |
| H | 5.09102800  | 3.09063300  | 0.48502100  |
| C | 5.51195900  | 1.06456200  | 1.07942900  |
| H | 6.42498600  | 1.32943800  | 1.61050900  |
| C | 5.08792700  | -0.26865500 | 1.03202800  |
| H | 5.67663500  | -1.03560700 | 1.53372100  |
| C | 3.91123200  | -0.63319700 | 0.35760600  |
| C | 2.82135500  | 2.84771700  | -0.99267600 |
| H | 1.81782200  | 2.47030100  | -1.23038100 |
| C | 2.65370600  | 4.11986200  | -0.13936500 |
| H | 2.01679700  | 4.83591200  | -0.67371200 |
| H | 2.17519400  | 3.89175500  | 0.81994600  |
| H | 3.61835800  | 4.61071300  | 0.05124100  |
| C | 3.52186900  | 3.20310500  | -2.32455900 |
| H | 2.94326800  | 3.96774400  | -2.85917300 |
| H | 4.52952500  | 3.60037800  | -2.13688900 |
| H | 3.61813200  | 2.32964300  | -2.97714200 |
| C | 3.46358500  | -2.09432400 | 0.33262600  |
| H | 2.41599700  | -2.10942600 | 0.00916800  |
| C | 3.53989000  | -2.76048100 | 1.72204000  |
| H | 3.15449200  | -3.78612600 | 1.66366500  |
| H | 4.57287200  | -2.81835000 | 2.08991400  |
| H | 2.94266300  | -2.21783200 | 2.46283300  |
| C | 4.29527900  | -2.92284100 | -0.67381200 |
| H | 4.22243000  | -2.51836400 | -1.68803600 |
| H | 5.35572300  | -2.92807400 | -0.38547200 |
| H | 3.93909300  | -3.96171200 | -0.69412000 |
| C | -1.70605800 | -2.21815900 | -0.38406200 |
| C | -1.53437000 | -3.13338000 | 0.68946600  |
| C | -2.68101900 | -3.70928900 | 1.26359900  |
| H | -2.57099900 | -4.39928200 | 2.09728100  |
| C | -3.96184100 | -3.42635600 | 0.77645400  |

|    |             |             |             |
|----|-------------|-------------|-------------|
| H  | -4.83722300 | -3.87440700 | 1.24388600  |
| C  | -4.10426400 | -2.59007100 | -0.33255900 |
| H  | -5.09645900 | -2.40282400 | -0.74148200 |
| C  | -2.99079700 | -1.98483100 | -0.94316100 |
| C  | -0.14211500 | -3.56223100 | 1.14615800  |
| H  | 0.49347300  | -2.67117600 | 1.12454200  |
| C  | -0.11322500 | -4.14761100 | 2.57140300  |
| H  | 0.92659000  | -4.25084900 | 2.90683800  |
| H  | -0.64445200 | -3.51312000 | 3.29135500  |
| H  | -0.56881000 | -5.14712700 | 2.60657300  |
| C  | 0.46198300  | -4.59901800 | 0.16807100  |
| H  | 1.42610000  | -4.96130300 | 0.55031800  |
| H  | -0.20763300 | -5.46261600 | 0.05579500  |
| H  | 0.63815000  | -4.16600500 | -0.82100300 |
| C  | -3.21247500 | -1.15716400 | -2.20627500 |
| H  | -2.23839800 | -0.82168300 | -2.57979500 |
| C  | -4.03842800 | 0.10692700  | -1.91693300 |
| H  | -4.17043600 | 0.69524000  | -2.83390100 |
| H  | -5.03334100 | -0.15010800 | -1.52612500 |
| H  | -3.51569000 | 0.72788100  | -1.18283700 |
| C  | -3.91369200 | -1.99157600 | -3.30507200 |
| H  | -3.93518700 | -1.42533100 | -4.24578100 |
| H  | -3.41038200 | -2.94838400 | -3.48635200 |
| H  | -4.95286000 | -2.21150700 | -3.02486100 |
| C  | 3.35779700  | -0.43695900 | -3.04087200 |
| H  | 3.58041800  | -1.32536600 | -3.64107200 |
| H  | 3.16049000  | 0.39449200  | -3.73238000 |
| H  | 4.23291200  | -0.17561400 | -2.43903600 |
| C  | 2.11821200  | -0.64423100 | -2.19175600 |
| C  | 1.13613200  | -1.49864700 | -2.69356800 |
| H  | 1.35070200  | -1.93749300 | -3.66580100 |
| C  | -0.03418100 | -1.99935400 | -2.06545600 |
| C  | -0.67306500 | -3.15883500 | -2.81748000 |
| H  | 0.10292400  | -3.85001900 | -3.16588800 |
| H  | -1.39645400 | -3.70707900 | -2.21023600 |
| H  | -1.18812100 | -2.76787100 | -3.70483600 |
| C  | 1.13608200  | -0.18582900 | 2.65195000  |
| C  | 0.30805900  | -0.64214500 | 3.82562800  |
| H  | -0.23490200 | 0.23027100  | 4.21448400  |
| H  | -0.40472400 | -1.41347100 | 3.53387100  |
| H  | 0.96394500  | -1.00453100 | 4.62957800  |
| C  | 2.32155000  | 0.68678600  | 2.96598200  |
| H  | 2.08847200  | 1.36533800  | 3.79316400  |
| H  | 3.14127300  | 0.02328100  | 3.28747600  |
| H  | 2.65831800  | 1.24340800  | 2.09064600  |
| C  | -2.48802100 | 3.64327600  | -0.17777600 |
| C  | -2.94832400 | 4.58842200  | 0.95114200  |
| H  | -3.87006800 | 4.25621400  | 1.44044200  |
| H  | -2.16404200 | 4.69866400  | 1.71061800  |
| H  | -3.14443200 | 5.58127700  | 0.51706500  |
| C  | -1.26827600 | 4.30511800  | -0.85384500 |
| H  | -0.83580300 | 3.66900800  | -1.63070000 |
| H  | -1.60141600 | 5.24928500  | -1.31275900 |
| H  | -0.48915500 | 4.53217600  | -0.11703700 |
| C  | -3.11616500 | 1.39781900  | 1.96288900  |
| C  | -2.80386000 | -0.10063200 | 2.14676400  |
| H  | -1.72324000 | -0.26916000 | 2.21832000  |
| H  | -3.27493400 | -0.47388900 | 3.06893400  |
| H  | -3.17984000 | -0.68902700 | 1.30515200  |
| C  | -4.60666100 | 1.53507100  | 1.58960200  |
| H  | -4.92176500 | 2.57846300  | 1.47964000  |
| H  | -4.83765000 | 1.00128400  | 0.66085400  |
| H  | -5.21480600 | 1.08840800  | 2.39142000  |
| Cl | -0.40875900 | 1.30745900  | -2.40438300 |
| N  | 1.97794100  | -0.00069600 | -1.00677500 |
| N  | -0.55321100 | -1.52938000 | -0.91913000 |
| O  | 0.91328900  | -0.63458000 | 1.50318500  |
| P  | 0.01513700  | 2.18107500  | 1.30838400  |

|    |             |            |             |
|----|-------------|------------|-------------|
| P  | -1.94336900 | 1.92315500 | 0.52255700  |
| Ti | 0.11134100  | 0.46130700 | -0.28893700 |
| C  | -2.81558400 | 2.13922700 | 3.27966500  |
| H  | -3.08854000 | 3.19821000 | 3.23452200  |
| H  | -3.38847500 | 1.67372000 | 4.09732100  |
| H  | -1.74534800 | 2.07652700 | 3.51867500  |
| C  | -3.60166600 | 3.46413700 | -1.22939600 |
| H  | -3.23234900 | 2.88645800 | -2.08366300 |
| H  | -4.48626600 | 2.96017700 | -0.82244800 |
| H  | -3.91602900 | 4.45475300 | -1.59304000 |

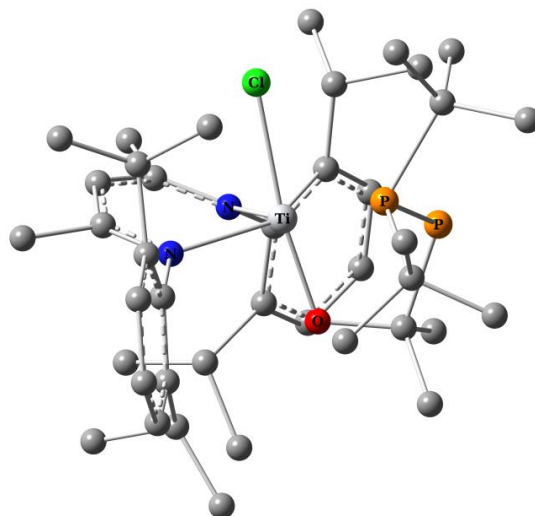

**Figure S200.** Optimized structure of **3gr**.

Below are presented xyz coordinates for optimized geometry of **3gr**:

|   |             |             |             |
|---|-------------|-------------|-------------|
| C | -3.25901000 | 0.00889300  | 0.22188000  |
| C | -3.87659900 | 1.26022200  | 0.46176900  |
| C | -5.01624500 | 1.58650900  | -0.29774800 |
| H | -5.50073600 | 2.54875700  | -0.13801200 |
| C | -5.54009800 | 0.69770600  | -1.24021500 |
| H | -6.42391500 | 0.96961900  | -1.81521000 |
| C | -4.92972400 | -0.54705300 | -1.43915100 |
| H | -5.34985200 | -1.23825700 | -2.16786000 |
| C | -3.77877800 | -0.91276300 | -0.72492900 |
| C | -3.38140400 | 2.23018600  | 1.52876500  |
| H | -2.51765800 | 1.77374500  | 2.02718600  |
| C | -2.91345500 | 3.56523400  | 0.91239300  |
| H | -2.51976100 | 4.22317000  | 1.69818000  |
| H | -2.12207800 | 3.39792500  | 0.17361300  |
| H | -3.74755600 | 4.08344800  | 0.41829300  |
| C | -4.47394200 | 2.49723600  | 2.59029000  |
| H | -4.06209200 | 3.10741900  | 3.40492700  |
| H | -5.32025200 | 3.04565100  | 2.15426100  |
| H | -4.86660900 | 1.56684700  | 3.01856600  |
| C | -3.13153900 | -2.27849800 | -0.93231300 |
| H | -2.11552100 | -2.21961400 | -0.52505600 |
| C | -3.01850900 | -2.66203600 | -2.41975600 |
| H | -2.52985300 | -3.63966000 | -2.51659300 |
| H | -4.00292900 | -2.74073900 | -2.90006500 |
| H | -2.41957900 | -1.92488600 | -2.96485000 |
| C | -3.89938400 | -3.37103700 | -0.15234100 |
| H | -3.93000900 | -3.15057200 | 0.92100200  |
| H | -4.93427100 | -3.45105800 | -0.51299000 |
| H | -3.41138000 | -4.34600900 | -0.28538000 |
| C | 1.87900400  | -2.06313600 | 0.43454100  |
| C | 1.89314900  | -2.84255100 | -0.74865700 |
| C | 3.12512500  | -3.34320900 | -1.20347000 |
| H | 3.15382400  | -3.94086700 | -2.11205200 |
| C | 4.31273600  | -3.08977100 | -0.50945800 |

|    |             |             |             |
|----|-------------|-------------|-------------|
| H  | 5.25886600  | -3.47979000 | -0.88131300 |
| C  | 4.27554000  | -2.33725900 | 0.66766200  |
| H  | 5.19841300  | -2.15000000 | 1.21499200  |
| C  | 3.06766000  | -1.82106800 | 1.17102400  |
| C  | 0.59675800  | -3.20026500 | -1.46544200 |
| H  | -0.10407000 | -2.37374900 | -1.30668500 |
| C  | 0.77255200  | -3.36732100 | -2.98635100 |
| H  | -0.21060400 | -3.46390800 | -3.46289900 |
| H  | 1.28074000  | -2.49984900 | -3.42438500 |
| H  | 1.34939100  | -4.26815400 | -3.23808800 |
| C  | -0.01055000 | -4.48164000 | -0.84738300 |
| H  | -0.92835500 | -4.76666000 | -1.37822100 |
| H  | 0.69866800  | -5.31810600 | -0.91569500 |
| H  | -0.26513200 | -4.33287900 | 0.20847200  |
| C  | 3.09075600  | -1.03879700 | 2.48082500  |
| H  | 2.05752700  | -0.83046000 | 2.78273500  |
| C  | 3.77622200  | 0.32293600  | 2.27583600  |
| H  | 3.74696300  | 0.91401100  | 3.20006700  |
| H  | 4.82682900  | 0.19271500  | 1.97903600  |
| H  | 3.25202200  | 0.87961800  | 1.49294200  |
| C  | 3.79886700  | -1.81581200 | 3.61432500  |
| H  | 3.67024600  | -1.28409300 | 4.56626700  |
| H  | 3.40797800  | -2.83402300 | 3.72926500  |
| H  | 4.87753000  | -1.89567800 | 3.42295000  |
| C  | -3.52770300 | -1.11413600 | 2.81218000  |
| H  | -3.58690200 | -1.96442000 | 3.49828300  |
| H  | -3.60877000 | -0.18893200 | 3.39857500  |
| H  | -4.37821000 | -1.14097300 | 2.12290500  |
| C  | -2.20750900 | -1.10594100 | 2.07262600  |
| C  | -1.16370200 | -1.88479200 | 2.57713600  |
| H  | -1.38847100 | -2.44548000 | 3.48104200  |
| C  | 0.07758900  | -2.20170700 | 1.97265900  |
| C  | 0.77671300  | -3.39663800 | 2.60641000  |
| H  | 0.02939800  | -4.13851700 | 2.90788400  |
| H  | 1.49922600  | -3.86505400 | 1.93451400  |
| H  | 1.30927300  | -3.07604000 | 3.51077600  |
| C  | -0.67936000 | 0.82348600  | -2.41297500 |
| C  | 0.05529100  | 0.43807700  | -3.69792200 |
| H  | 0.02670100  | 1.27534800  | -4.40662300 |
| H  | 1.09541800  | 0.16152100  | -3.52815000 |
| H  | -0.45972500 | -0.42074400 | -4.15286900 |
| C  | -2.14159500 | 1.15006800  | -2.77736800 |
| H  | -2.15702600 | 1.97042200  | -3.50640400 |
| H  | -2.61915400 | 0.26964600  | -3.22392800 |
| H  | -2.72190800 | 1.45436800  | -1.90163900 |
| C  | 2.11479800  | 3.66700100  | 0.26647500  |
| C  | 2.59784900  | 4.65658800  | -0.81506700 |
| H  | 3.59489200  | 4.42219900  | -1.20004600 |
| H  | 1.89078800  | 4.69510200  | -1.65305000 |
| H  | 2.64714900  | 5.65956600  | -0.36449300 |
| C  | 0.81136800  | 4.25981000  | 0.85098600  |
| H  | 0.33392200  | 3.59107800  | 1.57006300  |
| H  | 1.08087700  | 5.19445000  | 1.36694800  |
| H  | 0.09151900  | 4.50750700  | 0.06297000  |
| C  | 3.21372000  | 1.53802800  | -1.77555300 |
| C  | 3.14279900  | 0.00658900  | -1.96892500 |
| H  | 2.12141600  | -0.36024800 | -2.10314200 |
| H  | 3.73698800  | -0.28755400 | -2.84686800 |
| H  | 3.55227100  | -0.50298100 | -1.09214700 |
| C  | 4.61869700  | 1.84057300  | -1.20631300 |
| H  | 4.81007800  | 2.91090000  | -1.07874900 |
| H  | 4.78050600  | 1.33611000  | -0.24696600 |
| H  | 5.36509600  | 1.45215000  | -1.91619900 |
| Cl | 0.06811700  | 1.28911600  | 2.36664700  |
| N  | -2.06927500 | -0.38142200 | 0.94094000  |
| N  | 0.61401000  | -1.55418000 | 0.91997800  |
| O  | -0.64370900 | -0.27448600 | -1.47173700 |
| P  | -0.14711000 | 2.33229300  | -1.36222200 |

|    |             |            |             |
|----|-------------|------------|-------------|
| P  | 1.82444000  | 1.89321400 | -0.49113600 |
| Ti | -0.26961900 | 0.28093200 | 0.26698100  |
| C  | 3.02495000  | 2.27961900 | -3.11471100 |
| H  | 3.25147000  | 3.34602900 | -3.02382200 |
| H  | 3.71072500  | 1.85099200 | -3.86186400 |
| H  | 2.00233100  | 2.18797500 | -3.49192300 |
| C  | 3.13953700  | 3.56859400 | 1.41577400  |
| H  | 2.72901000  | 2.98107200 | 2.24360400  |
| H  | 4.08993300  | 3.12237300 | 1.10422000  |
| H  | 3.34918300  | 4.58371500 | 1.78590200  |

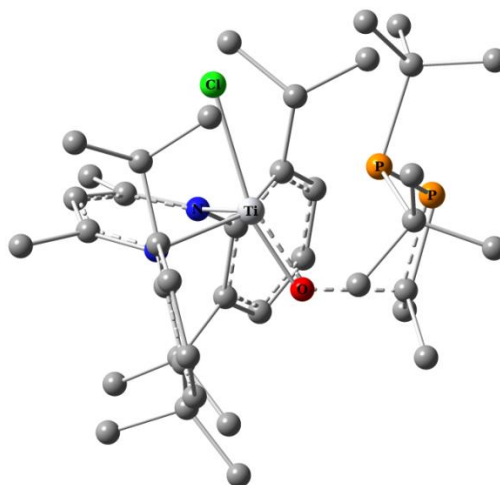

**Figure S201.** Optimized structure of **3grs2**.

Below are presented xyz coordinates for optimized geometry of **3grs2**:

|   |             |             |             |
|---|-------------|-------------|-------------|
| C | 3.10014900  | -0.00403100 | -0.37937900 |
| C | 3.55048500  | 1.31692300  | -0.63598300 |
| C | 4.76628400  | 1.71631900  | -0.05397100 |
| H | 5.14047500  | 2.72007300  | -0.23877900 |
| C | 5.50031900  | 0.85475600  | 0.77063800  |
| H | 6.43812500  | 1.18988400  | 1.21096600  |
| C | 5.01610600  | -0.42717500 | 1.04000800  |
| H | 5.57701200  | -1.08738500 | 1.70091100  |
| C | 3.81218100  | -0.88240600 | 0.47347000  |
| C | 2.75031800  | 2.27170900  | -1.51834500 |
| H | 1.68936700  | 2.10807800  | -1.27739000 |
| C | 3.05726600  | 3.75053100  | -1.22781200 |
| H | 2.37278800  | 4.38260700  | -1.80547800 |
| H | 2.92219300  | 3.98149200  | -0.16388400 |
| H | 4.08015100  | 4.02133400  | -1.52538000 |
| C | 2.92319000  | 1.97941300  | -3.02496600 |
| H | 2.38212600  | 2.73509600  | -3.60877200 |
| H | 3.98397700  | 2.01217500  | -3.31165500 |
| H | 2.50572100  | 1.00499700  | -3.29422600 |
| C | 3.30809800  | -2.28247400 | 0.81721300  |
| H | 2.37915100  | -2.45887500 | 0.26190500  |
| C | 2.97947200  | -2.38688300 | 2.32235600  |
| H | 2.68634000  | -3.41356600 | 2.57717000  |
| H | 3.85271700  | -2.12587200 | 2.93555100  |
| H | 2.15341300  | -1.71636500 | 2.58137400  |
| C | 4.32491600  | -3.37883900 | 0.42787500  |
| H | 4.60919400  | -3.31587800 | -0.62903200 |
| H | 5.24280700  | -3.29574900 | 1.02547600  |
| H | 3.89442400  | -4.37269300 | 0.60930900  |
| C | -1.85935200 | -2.26133600 | -0.20637500 |
| C | -1.78184800 | -2.87913300 | 1.06986300  |
| C | -2.97979900 | -3.24853000 | 1.70233100  |
| H | -2.94311600 | -3.71689600 | 2.68306300  |
| C | -4.22043800 | -3.02807700 | 1.09337000  |

|    |             |             |             |
|----|-------------|-------------|-------------|
| H  | -5.13776600 | -3.31932800 | 1.60265600  |
| C  | -4.27729500 | -2.43210400 | -0.16819500 |
| H  | -5.24406600 | -2.25928000 | -0.63860300 |
| C  | -3.10871400 | -2.03489100 | -0.84339900 |
| C  | -0.43173300 | -3.18929700 | 1.70281800  |
| H  | 0.25115400  | -2.38091200 | 1.41547900  |
| C  | -0.48628500 | -3.23260800 | 3.24059100  |
| H  | 0.52873600  | -3.31735400 | 3.64617300  |
| H  | -0.94170100 | -2.32038200 | 3.64513700  |
| H  | -1.05690600 | -4.09710000 | 3.60747400  |
| C  | 0.12399400  | -4.51847300 | 1.13944600  |
| H  | 1.09210200  | -4.75460400 | 1.60044100  |
| H  | -0.56653500 | -5.34720300 | 1.34805100  |
| H  | 0.27346300  | -4.45905300 | 0.05505900  |
| C  | -3.23753100 | -1.35291600 | -2.20078500 |
| H  | -2.23617400 | -1.22391600 | -2.62659100 |
| C  | -3.82382700 | 0.06079600  | -2.02280300 |
| H  | -3.86925500 | 0.58266200  | -2.98663000 |
| H  | -4.83683100 | 0.01378500  | -1.59838500 |
| H  | -3.18458700 | 0.64900500  | -1.35542600 |
| C  | -4.10091200 | -2.16813300 | -3.18884500 |
| H  | -4.06558700 | -1.70367400 | -4.18279200 |
| H  | -3.75565700 | -3.20586000 | -3.27793400 |
| H  | -5.15232300 | -2.19474800 | -2.87217600 |
| C  | 3.42620600  | -1.46080800 | -2.73787900 |
| H  | 4.05938400  | -0.58699600 | -2.56940700 |
| H  | 3.95545800  | -2.34176000 | -2.35342000 |
| H  | 3.28069800  | -1.60463400 | -3.81487300 |
| C  | 2.07102900  | -1.32502200 | -2.06364200 |
| C  | 1.06368000  | -2.19574300 | -2.52817600 |
| H  | 1.32860500  | -2.79975300 | -3.39270400 |
| C  | -0.14964200 | -2.52736100 | -1.90336800 |
| C  | -0.89144100 | -3.73804500 | -2.43505700 |
| H  | -0.18564800 | -4.44852100 | -2.87708900 |
| H  | -1.46324700 | -4.23679100 | -1.64611800 |
| H  | -1.59843300 | -3.43266800 | -3.21692400 |
| C  | 0.87081800  | 1.39404300  | 2.50316300  |
| C  | 0.12912900  | 0.82827700  | 3.69591500  |
| H  | 0.26418200  | 1.52357500  | 4.53906900  |
| H  | -0.93807600 | 0.70525200  | 3.52720200  |
| H  | 0.55896500  | -0.14088000 | 3.98070200  |
| C  | 2.37376900  | 1.33246000  | 2.72633700  |
| H  | 2.61085200  | 1.80327000  | 3.69274000  |
| H  | 2.69705500  | 0.28868300  | 2.78331800  |
| H  | 2.93976500  | 1.83032100  | 1.93546200  |
| C  | -1.78722600 | 3.74169800  | -0.52549000 |
| C  | -2.22641000 | 4.91938500  | 0.37312200  |
| H  | -3.20457100 | 4.75672300  | 0.83774300  |
| H  | -1.49038000 | 5.10797600  | 1.16493300  |
| H  | -2.30246500 | 5.82448800  | -0.24855000 |
| C  | -0.48411000 | 4.15962000  | -1.24439200 |
| H  | -0.07844500 | 3.33855000  | -1.84363600 |
| H  | -0.72537200 | 4.99448100  | -1.92044000 |
| H  | 0.27947100  | 4.50070500  | -0.53806500 |
| C  | -2.95487400 | 1.86651900  | 1.71693900  |
| C  | -2.95076800 | 0.34388600  | 1.99227000  |
| H  | -1.95973200 | -0.05337900 | 2.22776500  |
| H  | -3.62873100 | 0.11476200  | 2.82790400  |
| H  | -3.31117800 | -0.19850400 | 1.11067600  |
| C  | -4.33145700 | 2.18779300  | 1.09476000  |
| H  | -4.47623200 | 3.25585500  | 0.90386800  |
| H  | -4.50175400 | 1.63368100  | 0.16657200  |
| H  | -5.10395800 | 1.87284000  | 1.81361900  |
| Cl | -0.48149400 | 0.86817500  | -2.52794400 |
| N  | 1.90292300  | -0.48958300 | -1.02074700 |
| N  | -0.63554700 | -1.83930200 | -0.84854000 |
| O  | 0.43243100  | -0.10387300 | 1.32883600  |
| P  | 0.41953200  | 2.79991600  | 1.47868000  |

|    |             |            |             |
|----|-------------|------------|-------------|
| P  | -1.44958100 | 2.16527800 | 0.52935800  |
| Ti | 0.01654100  | 0.01715200 | -0.34240800 |
| C  | -2.80472000 | 2.69232900 | 3.01215000  |
| H  | -2.95611900 | 3.75986800 | 2.81694300  |
| H  | -3.56590100 | 2.36659200 | 3.73804400  |
| H  | -1.81673500 | 2.58343200 | 3.46799700  |
| C  | -2.84235900 | 3.46264400 | -1.61815100 |
| H  | -2.48871100 | 2.68229500 | -2.29935400 |
| H  | -3.81448900 | 3.16951300 | -1.21262200 |
| H  | -2.98804300 | 4.38657000 | -2.19835900 |

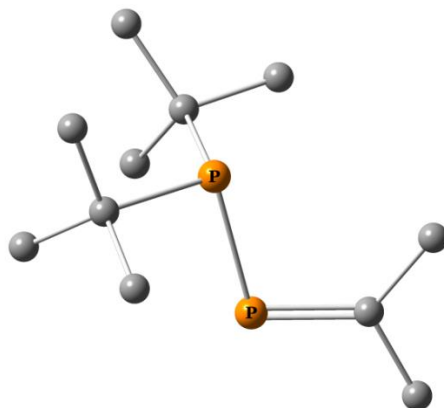

**Figure S202.** Optimized structure of **3g**.

Below are presented xyz coordinates for optimized geometry of **3g**:

|   |             |             |             |
|---|-------------|-------------|-------------|
| C | -2.70485400 | -0.37712000 | -0.09323100 |
| P | -1.27887000 | -0.64425200 | 0.80697000  |
| P | 0.33995100  | -0.03112000 | -0.60980000 |
| C | 0.75718800  | 1.71251600  | 0.10097700  |
| C | -0.32004900 | 2.62826000  | -0.52741000 |
| C | 0.69367000  | 1.86981000  | 1.63344900  |
| C | 2.14470000  | 2.15003200  | -0.40993800 |
| H | -0.29653300 | 2.58296600  | -1.62370300 |
| H | -1.32547000 | 2.34362000  | -0.18962800 |
| H | -0.14254100 | 3.66949000  | -0.21814600 |
| H | 1.42692600  | 1.24162500  | 2.14805600  |
| H | 0.90199500  | 2.91870800  | 1.89714600  |
| H | -0.30211100 | 1.61766800  | 2.02054200  |
| H | 2.28954700  | 3.22033100  | -0.19739400 |
| H | 2.95098400  | 1.60164000  | 0.09188600  |
| H | 2.24323800  | 2.00214600  | -1.49351200 |
| C | 1.68855700  | -1.29933700 | -0.09672400 |
| C | 2.86740000  | -1.16387700 | -1.08841900 |
| C | 2.20458600  | -1.20684900 | 1.35056300  |
| C | 1.04051000  | -2.68673800 | -0.32021700 |
| H | 2.51977800  | -1.23998800 | -2.12658900 |
| H | 3.39913000  | -0.21312600 | -0.97452800 |
| H | 3.58926200  | -1.97507200 | -0.90735800 |
| H | 1.38318300  | -1.25527600 | 2.07655000  |
| H | 2.88572700  | -2.04852100 | 1.55173700  |
| H | 2.76712700  | -0.28093700 | 1.52016900  |
| H | 1.80674600  | -3.46795300 | -0.20382000 |
| H | 0.24170900  | -2.88433700 | 0.40680300  |
| H | 0.61508600  | -2.77202200 | -1.32930600 |
| C | -4.01824300 | -0.68333600 | 0.59949800  |
| H | -4.64926900 | 0.21826800  | 0.63755200  |
| H | -4.57837600 | -1.43951900 | 0.02773600  |
| H | -3.87416000 | -1.05138400 | 1.62164500  |
| C | -2.85603300 | 0.14077000  | -1.50097800 |
| H | -3.32696500 | 1.13665600  | -1.48609200 |
| H | -1.89601400 | 0.21789300  | -2.02142700 |
| H | -3.52980800 | -0.51709000 | -2.07128600 |

### E.3.11. Reaction of **1** with cyclohexanone leading to **3h**

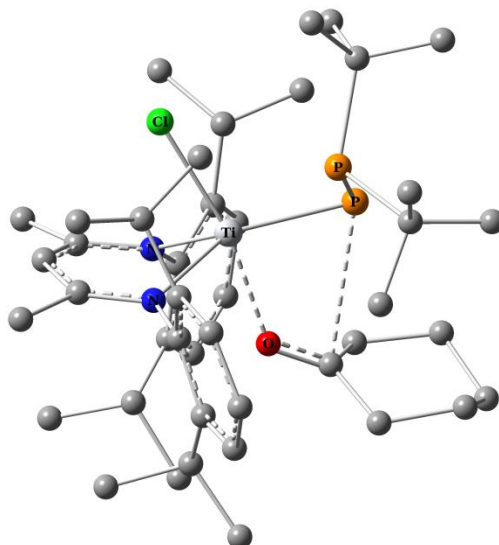

**Figure S203.** Optimized structure of **3hrs1**.

Below are presented xyz coordinates for optimized geometry of **3hrs1**:

|   |             |             |             |
|---|-------------|-------------|-------------|
| C | -3.04715900 | -0.14244400 | -0.89818400 |
| C | -3.47943800 | -1.48621800 | -1.04088300 |
| C | -4.73374600 | -1.83565600 | -0.50564100 |
| H | -5.08773700 | -2.85944900 | -0.61168000 |
| C | -5.53462700 | -0.89654100 | 0.15144100  |
| H | -6.50459200 | -1.18923600 | 0.55073600  |
| C | -5.08121400 | 0.41953600  | 0.30006500  |
| H | -5.70356800 | 1.14410200  | 0.82380900  |
| C | -3.83267000 | 0.81912600  | -0.20361100 |
| C | -2.65666800 | -2.52859500 | -1.79080800 |
| H | -1.62306600 | -2.16159300 | -1.85268400 |
| C | -2.62376100 | -3.88822900 | -1.06746100 |
| H | -1.93994900 | -4.56514500 | -1.59439600 |
| H | -2.26220100 | -3.77724900 | -0.03854200 |
| H | -3.61424100 | -4.36393900 | -1.04888000 |
| C | -3.17693300 | -2.71136900 | -3.23464800 |
| H | -2.55011300 | -3.43664600 | -3.76964000 |
| H | -4.21101200 | -3.08436800 | -3.22908300 |
| H | -3.15808900 | -1.76905400 | -3.79139700 |
| C | -3.34983300 | 2.25560500  | -0.00376200 |
| H | -2.27356300 | 2.27012000  | -0.21339700 |
| C | -3.55613900 | 2.74970600  | 1.44330600  |
| H | -3.13146300 | 3.75496100  | 1.55737200  |
| H | -4.62082100 | 2.81062700  | 1.70515000  |
| H | -3.06448300 | 2.09144000  | 2.16799200  |
| C | -4.04908800 | 3.23155300  | -0.97780200 |
| H | -3.87579300 | 2.95378700  | -2.02197800 |
| H | -5.13414000 | 3.23890500  | -0.80356600 |
| H | -3.66983200 | 4.25161400  | -0.82849800 |
| C | 1.86565600  | 2.23997700  | -0.15144400 |
| C | 1.61695100  | 2.99836100  | 1.02546000  |
| C | 2.71931700  | 3.40956400  | 1.79513700  |
| H | 2.55141400  | 3.97525600  | 2.70867500  |
| C | 4.03147700  | 3.11648400  | 1.40709700  |
| H | 4.86894900  | 3.42996100  | 2.02829300  |
| C | 4.25816100  | 2.45056400  | 0.20096500  |
| H | 5.27997800  | 2.26651900  | -0.12884400 |
| C | 3.19280200  | 2.01982700  | -0.60996100 |
| C | 0.20289800  | 3.44051300  | 1.39770900  |



|    |             |             |             |
|----|-------------|-------------|-------------|
| H  | -0.45882300 | 2.58456300  | 1.22548600  |
| C  | 0.06175900  | 3.88564600  | 2.86638100  |
| H  | -1.00091000 | 4.01205700  | 3.11069000  |
| H  | 0.48989200  | 3.15786100  | 3.56593300  |
| H  | 0.55460400  | 4.85216600  | 3.04206500  |
| C  | -0.27344800 | 4.59686700  | 0.48476700  |
| H  | -1.24678400 | 4.97155600  | 0.82968700  |
| H  | 0.44139300  | 5.43057700  | 0.50932700  |
| H  | -0.39250100 | 4.27104400  | -0.55233500 |
| C  | 3.51196800  | 1.41034800  | -1.97303700 |
| H  | 2.56896200  | 1.18236600  | -2.48240300 |
| C  | 4.27873900  | 0.08483800  | -1.84923600 |
| H  | 4.46471700  | -0.34187400 | -2.84308000 |
| H  | 5.24799500  | 0.23059300  | -1.35134000 |
| H  | 3.68510600  | -0.63072700 | -1.27366100 |
| C  | 4.33179700  | 2.39755200  | -2.83943900 |
| H  | 4.42731700  | 2.00612000  | -3.86114200 |
| H  | 3.87288200  | 3.39162100  | -2.88901100 |
| H  | 5.34512300  | 2.52033800  | -2.43338200 |
| C  | -2.93243400 | 1.00995800  | -3.51939800 |
| H  | -3.06595300 | 1.96935000  | -4.03012600 |
| H  | -2.68761600 | 0.25542900  | -4.28051000 |
| H  | -3.87268300 | 0.71643300  | -3.04375600 |
| C  | -1.78308900 | 1.06728600  | -2.53126000 |
| C  | -0.73474300 | 1.94395600  | -2.81772200 |
| H  | -0.83638900 | 2.51081800  | -3.74090200 |
| C  | 0.36970800  | 2.32055600  | -2.01139300 |
| C  | 1.10376100  | 3.55149300  | -2.52464700 |
| H  | 0.37986600  | 4.31740900  | -2.82613200 |
| H  | 1.78366900  | 3.97409800  | -1.78167300 |
| H  | 1.68436700  | 3.27856600  | -3.41540400 |
| C  | 2.48366600  | -3.58424000 | -0.72675000 |
| C  | 2.95685000  | -4.67882200 | 0.25033500  |
| H  | 3.88589700  | -4.41618600 | 0.76791900  |
| H  | 2.18450800  | -4.90162300 | 0.99668300  |
| H  | 3.14862400  | -5.59797700 | -0.32513300 |
| C  | 1.25186000  | -4.14170400 | -1.47109800 |
| H  | 0.80863600  | -3.40040600 | -2.14171600 |
| H  | 1.57483900  | -5.00956400 | -2.06758500 |
| H  | 0.48475500  | -4.47224000 | -0.76144200 |
| C  | 3.05009900  | -1.70685800 | 1.76631900  |
| C  | 2.65808700  | -0.29951800 | 2.25499500  |
| H  | 1.58267900  | -0.26027900 | 2.46013300  |
| H  | 3.20007200  | -0.06213500 | 3.18307000  |
| H  | 2.89446200  | 0.46636900  | 1.51039900  |
| C  | 4.55240600  | -1.70676600 | 1.41824800  |
| H  | 4.89910400  | -2.67778600 | 1.04653800  |
| H  | 4.78691400  | -0.94350400 | 0.66879400  |
| H  | 5.12921200  | -1.47410500 | 2.32675100  |
| Cl | 0.68553800  | -0.94300100 | -2.73201300 |
| N  | -1.78135200 | 0.28038100  | -1.42921600 |
| N  | 0.75432900  | 1.68714900  | -0.89052600 |
| O  | -1.00336800 | 0.52946900  | 1.18721100  |
| P  | -0.05264700 | -2.20923600 | 0.83536900  |
| P  | 1.95601800  | -1.96314000 | 0.19711900  |
| Ti | -0.00938700 | -0.32837500 | -0.57773800 |
| C  | 2.75064600  | -2.71197100 | 2.89660500  |
| H  | 3.13536200  | -3.71335600 | 2.68318000  |
| H  | 3.22499100  | -2.35956300 | 3.82625700  |
| H  | 1.66797400  | -2.78682300 | 3.06503500  |
| C  | 3.59125000  | -3.27022100 | -1.75282000 |
| H  | 3.22991300  | -2.56083500 | -2.50496000 |
| H  | 4.48925500  | -2.85391700 | -1.27990300 |
| H  | 3.88172000  | -4.20095300 | -2.26474000 |
| C  | -1.36937400 | 0.02309700  | 2.27653800  |
| C  | -0.73516800 | 0.47956600  | 3.56735500  |
| C  | -2.56814900 | -0.88394900 | 2.38590600  |
| C  | -0.57414500 | -0.67330400 | 4.58327000  |

|   |             |             |            |
|---|-------------|-------------|------------|
| H | -1.41823900 | 1.23665800  | 3.99192400 |
| H | 0.21061400  | 0.97981000  | 3.34356300 |
| C | -2.44132100 | -1.96791000 | 3.47949200 |
| H | -3.40758500 | -0.21049800 | 2.63879600 |
| H | -2.79446100 | -1.31273000 | 1.40635700 |
| C | -1.91131300 | -1.39850800 | 4.80503300 |
| H | -0.18302400 | -0.26577400 | 5.52499300 |
| H | 0.16914800  | -1.38187300 | 4.19356200 |
| H | -3.42333400 | -2.43857700 | 3.62012300 |
| H | -1.75088900 | -2.73857700 | 3.11085200 |
| H | -1.78096200 | -2.21064500 | 5.53316500 |
| H | -2.64456200 | -0.69635600 | 5.23472100 |

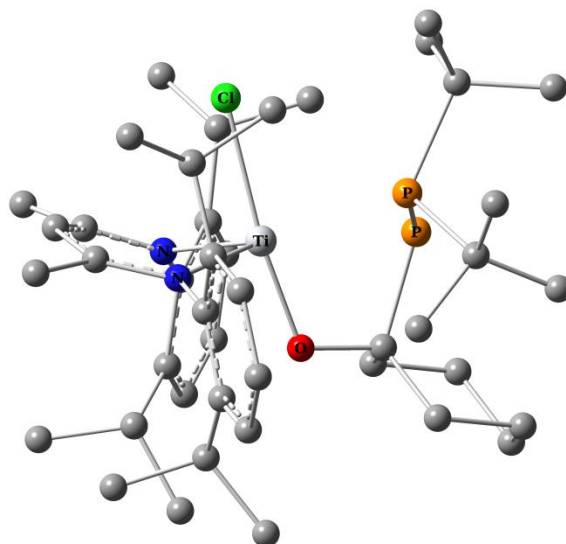

**Figure S204.** Optimized structure of **3hr**.

Below are presented xyz coordinates for optimized geometry of **3hr**:

|   |             |             |             |
|---|-------------|-------------|-------------|
| C | 3.10278300  | -0.61273000 | -0.63769800 |
| C | 3.80146500  | 0.41185400  | -1.32118800 |
| C | 5.04083300  | 0.82454600  | -0.79652900 |
| H | 5.58912800  | 1.62087700  | -1.29802100 |
| C | 5.58146100  | 0.22739000  | 0.34540300  |
| H | 6.54277800  | 0.56108900  | 0.73319600  |
| C | 4.88813600  | -0.80743500 | 0.98551400  |
| H | 5.32074600  | -1.27489700 | 1.86849000  |
| C | 3.63827200  | -1.24064300 | 0.51753500  |
| C | 3.27995400  | 1.04767800  | -2.60493700 |
| H | 2.33402800  | 0.55794800  | -2.86625600 |
| C | 2.98970600  | 2.55143200  | -2.41577900 |
| H | 2.57630000  | 2.97320400  | -3.34129000 |
| H | 2.26403500  | 2.70982900  | -1.61028100 |
| H | 3.90962800  | 3.10075900  | -2.16980200 |
| C | 4.27394100  | 0.84734800  | -3.77251500 |
| H | 3.83033800  | 1.21408500  | -4.70754000 |
| H | 5.20307200  | 1.40751200  | -3.59913900 |
| H | 4.54253600  | -0.20778800 | -3.90678000 |
| C | 2.89475000  | -2.37809500 | 1.21114700  |
| H | 1.84865100  | -2.32375500 | 0.88771900  |
| C | 2.91859800  | -2.25621900 | 2.74659700  |
| H | 2.35893500  | -3.08658000 | 3.19496400  |
| H | 3.94048500  | -2.29833300 | 3.14661100  |
| H | 2.45409300  | -1.31809000 | 3.06913900  |
| C | 3.46173100  | -3.74864600 | 0.77296300  |
| H | 3.38635900  | -3.88534300 | -0.31201700 |
| H | 4.51989700  | -3.83928700 | 1.05502400  |
| H | 2.90469200  | -4.56194100 | 1.25740700  |
| C | -2.18742800 | -2.02735600 | 0.22286400  |

|    |             |             |             |
|----|-------------|-------------|-------------|
| C  | -2.14525600 | -2.36965800 | 1.59668000  |
| C  | -3.36189600 | -2.55066200 | 2.27678800  |
| H  | -3.34736200 | -2.81101500 | 3.33304300  |
| C  | -4.58883600 | -2.40317700 | 1.62169800  |
| H  | -5.52130900 | -2.53800400 | 2.16747500  |
| C  | -4.60967700 | -2.08795500 | 0.25998800  |
| H  | -5.56488500 | -1.98702200 | -0.25357800 |
| C  | -3.42058800 | -1.90858900 | -0.46959700 |
| C  | -0.81704700 | -2.61937400 | 2.30035900  |
| H  | -0.06567300 | -1.98656200 | 1.81643400  |
| C  | -0.84256200 | -2.24042200 | 3.79280700  |
| H  | 0.17329900  | -2.29053100 | 4.20360100  |
| H  | -1.21885700 | -1.22029600 | 3.93521600  |
| H  | -1.46918700 | -2.92485300 | 4.38144500  |
| C  | -0.39915000 | -4.09804300 | 2.12245600  |
| H  | 0.54134600  | -4.29873200 | 2.65207500  |
| H  | -1.16970400 | -4.76938300 | 2.52600900  |
| H  | -0.24942100 | -4.34466400 | 1.06475200  |
| C  | -3.50862800 | -1.61242800 | -1.96393800 |
| H  | -2.49756700 | -1.64192100 | -2.38692400 |
| C  | -4.04272100 | -0.18926300 | -2.19696700 |
| H  | -4.05651000 | 0.04844700  | -3.26832100 |
| H  | -5.06406900 | -0.08396800 | -1.80383700 |
| H  | -3.39082500 | 0.53049100  | -1.69258300 |
| C  | -4.39424400 | -2.63602300 | -2.71055600 |
| H  | -4.31881100 | -2.47280300 | -3.79369800 |
| H  | -4.10557600 | -3.67159500 | -2.49399200 |
| H  | -5.45038900 | -2.52136700 | -2.43136200 |
| C  | 2.98851800  | -2.51045400 | -2.73139200 |
| H  | 2.88959900  | -3.52573600 | -3.12710000 |
| H  | 3.09930500  | -1.81748500 | -3.57618400 |
| H  | 3.90083700  | -2.44076600 | -2.12957100 |
| C  | 1.76173200  | -2.11779800 | -1.93694200 |
| C  | 0.60925000  | -2.89278700 | -2.07881500 |
| H  | 0.68707700  | -3.73426500 | -2.76291400 |
| C  | -0.57866100 | -2.85871900 | -1.30836500 |
| C  | -1.43023800 | -4.11328600 | -1.45225800 |
| H  | -0.77759300 | -4.99294700 | -1.47988800 |
| H  | -2.15425600 | -4.22755100 | -0.64304900 |
| H  | -1.97849900 | -4.07907100 | -2.40243800 |
| C  | -1.92623000 | 3.42600600  | -1.51521700 |
| C  | -2.24250800 | 4.75641600  | -0.79946100 |
| H  | -3.21681400 | 4.75673600  | -0.30123300 |
| H  | -1.46444500 | 4.99896200  | -0.06490300 |
| H  | -2.25926700 | 5.55665200  | -1.55492600 |
| C  | -0.63951700 | 3.66761400  | -2.33914000 |
| H  | -0.27482500 | 2.75817100  | -2.82098600 |
| H  | -0.88714600 | 4.40262300  | -3.12075000 |
| H  | 0.16191100  | 4.08951100  | -1.72271700 |
| C  | -3.00066600 | 2.20248300  | 1.17923600  |
| C  | -3.01333900 | 0.82800300  | 1.88300600  |
| H  | -2.00913100 | 0.44985900  | 2.09575900  |
| H  | -3.56572300 | 0.90059700  | 2.83173200  |
| H  | -3.51164300 | 0.08679300  | 1.25280000  |
| C  | -4.42237700 | 2.42205300  | 0.61412400  |
| H  | -4.55082000 | 3.40201700  | 0.14305600  |
| H  | -4.69293000 | 1.64435500  | -0.10860900 |
| H  | -5.13450400 | 2.36021100  | 1.45136400  |
| Cl | -0.31082900 | 0.30170900  | -2.83553800 |
| N  | 1.80900000  | -1.06169700 | -1.09503000 |
| N  | -0.94281300 | -1.85033700 | -0.49326400 |
| O  | 0.63833100  | 0.00270700  | 1.24840500  |
| P  | 0.37684200  | 2.46945400  | 0.30843200  |
| P  | -1.70104200 | 1.98014800  | -0.22461500 |
| Ti | 0.15213000  | -0.00928300 | -0.54737100 |
| C  | -2.66004900 | 3.32331400  | 2.17953800  |
| H  | -2.77194700 | 4.31821000  | 1.73938600  |
| H  | -3.34450700 | 3.25426600  | 3.03933900  |

|   |             |            |             |
|---|-------------|------------|-------------|
| H | -1.63555200 | 3.23509100 | 2.54923500  |
| C | -3.05087000 | 3.05861100 | -2.50580000 |
| H | -2.75829300 | 2.19523800 | -3.11236300 |
| H | -4.00162900 | 2.83583600 | -2.01016600 |
| H | -3.21487100 | 3.91263600 | -3.18049400 |
| C | 0.90086000  | 1.33325200 | 1.75525200  |
| C | 0.30200500  | 1.49288000 | 3.15903600  |
| C | 2.43322600  | 1.53148500 | 1.85205600  |
| C | 0.67847700  | 2.83886600 | 3.80740100  |
| H | 0.70570100  | 0.66650500 | 3.76775900  |
| H | -0.78288900 | 1.36932600 | 3.13631800  |
| C | 2.82608800  | 2.86983300 | 2.49985400  |
| H | 2.82864800  | 0.69963800 | 2.45153600  |
| H | 2.88005800  | 1.45145400 | 0.85574800  |
| C | 2.20296100  | 3.01350000 | 3.89684000  |
| H | 0.21560600  | 2.90423600 | 4.80220700  |
| H | 0.26575900  | 3.66269200 | 3.20421300  |
| H | 3.92235800  | 2.93134200 | 2.54916700  |
| H | 2.48491300  | 3.69863200 | 1.85994200  |
| H | 2.45079000  | 3.99156100 | 4.33289600  |
| H | 2.62125200  | 2.24406800 | 4.56623600  |

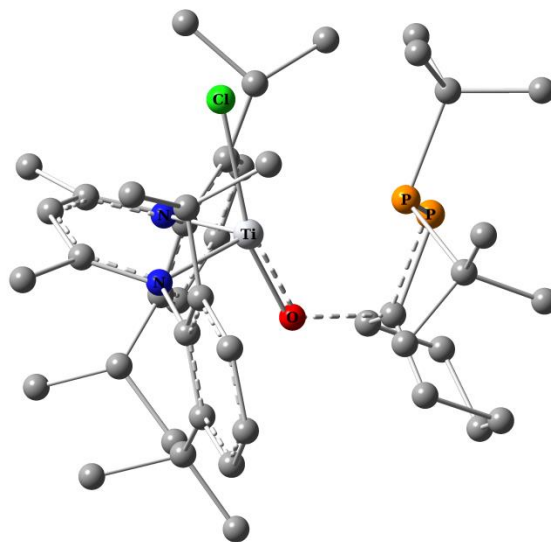

**Figure S205.** Optimized structure of **3hTs2**.

Below are presented xyz coordinates for optimized geometry of **3hTs2**:

|   |            |             |             |
|---|------------|-------------|-------------|
| C | 2.78528700 | -0.89954600 | -0.94413700 |
| C | 3.40505300 | 0.18995000  | -1.60985800 |
| C | 4.75199200 | 0.45859900  | -1.30879900 |
| H | 5.25461500 | 1.28322300  | -1.80776800 |
| C | 5.45634500 | -0.30121000 | -0.36669900 |
| H | 6.49775200 | -0.06941200 | -0.14858600 |
| C | 4.81269000 | -1.34320800 | 0.30436800  |
| H | 5.35517800 | -1.91740900 | 1.05492400  |
| C | 3.47142200 | -1.66477400 | 0.03033500  |
| C | 2.64015800 | 1.04374400  | -2.61790100 |
| H | 1.62672700 | 1.17638300  | -2.21069100 |
| C | 3.24470700 | 2.44730000  | -2.79039100 |
| H | 2.58940800 | 3.04737900  | -3.43244300 |
| H | 3.34009100 | 2.95813400  | -1.82422500 |
| H | 4.23082500 | 2.41068300  | -3.27460400 |
| C | 2.49029000 | 0.35648900  | -3.99275400 |
| H | 1.99406000 | 1.04151400  | -4.69211700 |
| H | 3.47296000 | 0.08852800  | -4.40655100 |
| H | 1.86865000 | -0.54097000 | -3.92597500 |
| C | 2.80279100 | -2.79684100 | 0.80708600  |
| H | 1.78258300 | -2.92052300 | 0.42460600  |

|    |             |             |             |
|----|-------------|-------------|-------------|
| C  | 2.69871400  | -2.43941400 | 2.30552000  |
| H  | 2.28410600  | -3.28479700 | 2.86990400  |
| H  | 3.68787800  | -2.20908600 | 2.72450000  |
| H  | 2.04510500  | -1.57230800 | 2.44608900  |
| C  | 3.55124800  | -4.13850000 | 0.64130100  |
| H  | 3.67872400  | -4.40863600 | -0.41366400 |
| H  | 4.54988000  | -4.09271600 | 1.09648600  |
| H  | 2.99300900  | -4.94388700 | 1.13696000  |
| C  | -2.39345400 | -1.92666000 | 0.43503700  |
| C  | -2.20879200 | -2.21588300 | 1.81313400  |
| C  | -3.32590200 | -2.14877900 | 2.66107300  |
| H  | -3.20477300 | -2.35996100 | 3.72094200  |
| C  | -4.59291500 | -1.81639000 | 2.16838900  |
| H  | -5.44528000 | -1.76582600 | 2.84412100  |
| C  | -4.75905000 | -1.54849800 | 0.80809600  |
| H  | -5.74555600 | -1.28824200 | 0.42744800  |
| C  | -3.67313300 | -1.59521100 | -0.08524500 |
| C  | -0.84725700 | -2.64693200 | 2.34188100  |
| H  | -0.09168400 | -2.10333800 | 1.76259600  |
| C  | -0.64279000 | -2.29493000 | 3.82637800  |
| H  | 0.39599100  | -2.49282300 | 4.11578800  |
| H  | -0.85430600 | -1.23477300 | 4.01266300  |
| H  | -1.28481800 | -2.89734300 | 4.48402600  |
| C  | -0.64124400 | -4.16192800 | 2.10688400  |
| H  | 0.33552100  | -4.47967100 | 2.49502100  |
| H  | -1.41992200 | -4.74393200 | 2.61887200  |
| H  | -0.67440600 | -4.40661400 | 1.03876500  |
| C  | -3.91226500 | -1.25934800 | -1.55291200 |
| H  | -2.99133600 | -1.45441400 | -2.11361800 |
| C  | -4.20786800 | 0.24504700  | -1.70541600 |
| H  | -4.32262500 | 0.50918400  | -2.76393900 |
| H  | -5.12861200 | 0.51968500  | -1.17118500 |
| H  | -3.37470100 | 0.83196900  | -1.30409600 |
| C  | -5.05882600 | -2.09326200 | -2.16653900 |
| H  | -5.11614700 | -1.90677300 | -3.24677200 |
| H  | -4.91616700 | -3.16943200 | -2.00704500 |
| H  | -6.02896300 | -1.81927700 | -1.73035100 |
| C  | 2.44609300  | -2.93761400 | -2.81172800 |
| H  | 2.90465200  | -3.74560700 | -2.22776100 |
| H  | 2.09438300  | -3.36722900 | -3.75661500 |
| H  | 3.21840700  | -2.19204500 | -3.01454100 |
| C  | 1.26717800  | -2.34761000 | -2.05607800 |
| C  | 0.05737000  | -3.06754700 | -2.14156000 |
| H  | 0.06047900  | -3.90910700 | -2.83005900 |
| C  | -1.07255800 | -2.96470900 | -1.31344200 |
| C  | -2.09706900 | -4.07874400 | -1.40281000 |
| H  | -1.61205800 | -5.01473400 | -1.69797900 |
| H  | -2.61723100 | -4.22321900 | -0.45066700 |
| H  | -2.85137800 | -3.83495300 | -2.16178800 |
| C  | -1.31901400 | 3.65366300  | -1.50591600 |
| C  | -1.38929000 | 5.08016200  | -0.91678300 |
| H  | -2.29028200 | 5.24776400  | -0.31716900 |
| H  | -0.51049500 | 5.29439500  | -0.29534300 |
| H  | -1.40719900 | 5.80142500  | -1.74800800 |
| C  | -0.10646800 | 3.59930700  | -2.46295500 |
| H  | 0.04449000  | 2.58950400  | -2.85674400 |
| H  | -0.31398400 | 4.27283400  | -3.30886100 |
| H  | 0.81376000  | 3.93555900  | -1.97460400 |
| C  | -2.38372200 | 2.67660000  | 1.28873700  |
| C  | -2.58255900 | 1.30709200  | 1.98047600  |
| H  | -1.64406800 | 0.79781900  | 2.21440900  |
| H  | -3.15134800 | 1.44129800  | 2.91270600  |
| H  | -3.15815100 | 0.63814100  | 1.33032000  |
| C  | -3.77447600 | 3.10543500  | 0.77206700  |
| H  | -3.76960100 | 4.09472600  | 0.30360800  |
| H  | -4.19229800 | 2.37967100  | 0.06763000  |
| H  | -4.45261900 | 3.15276900  | 1.63843100  |
| Cl | -0.90593200 | 0.16768000  | -2.80099300 |

|    |             |             |             |
|----|-------------|-------------|-------------|
| N  | 1.42917500  | -1.26239300 | -1.27541600 |
| N  | -1.24336800 | -1.95072000 | -0.43940300 |
| O  | 0.46836900  | -0.01729200 | 1.03849200  |
| P  | 1.00643900  | 2.77483500  | 0.39155600  |
| P  | -1.08094400 | 2.34597300  | -0.11100200 |
| Ti | -0.19631700 | -0.21166300 | -0.54074600 |
| C  | -1.87803000 | 3.75595500  | 2.26880700  |
| H  | -1.89963800 | 4.74845400  | 1.80518300  |
| H  | -2.53360300 | 3.77762300  | 3.15314600  |
| H  | -0.85075400 | 3.57626000  | 2.59837300  |
| C  | -2.57781600 | 3.34488800  | -2.34567200 |
| H  | -2.48344600 | 2.36729700  | -2.82901700 |
| H  | -3.50112800 | 3.36657600  | -1.76045000 |
| H  | -2.66274100 | 4.11122600  | -3.13122600 |
| C  | 1.37355500  | 1.59375200  | 1.69644900  |
| C  | 0.77594900  | 1.53341800  | 3.08865000  |
| C  | 2.85961400  | 1.26727200  | 1.74870000  |
| C  | 1.47558500  | 2.57905900  | 3.99601100  |
| H  | 0.95225300  | 0.52790700  | 3.49854600  |
| H  | -0.29908800 | 1.70704100  | 3.08206800  |
| C  | 3.60148100  | 2.28303400  | 2.65858400  |
| H  | 2.98092200  | 0.26272300  | 2.17017400  |
| H  | 3.29904200  | 1.26729100  | 0.74825100  |
| C  | 2.98918000  | 2.31938100  | 4.06760600  |
| H  | 1.02350600  | 2.53836700  | 4.99735600  |
| H  | 1.29128600  | 3.58517900  | 3.58985800  |
| H  | 4.66417800  | 2.00487700  | 2.69999200  |
| H  | 3.54027900  | 3.28100400  | 2.20010600  |
| H  | 3.48059200  | 3.09067300  | 4.67776600  |
| H  | 3.16566700  | 1.35234100  | 4.56577700  |

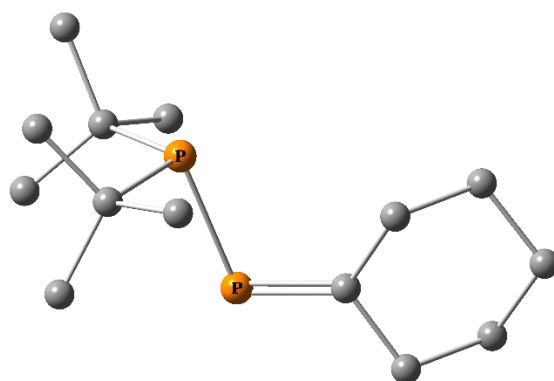

**Figure S206.** Optimized structure of **3h**.

Below are presented xyz coordinates for optimized geometry of **3h**:

|   |             |             |             |
|---|-------------|-------------|-------------|
| P | 0.99216900  | 0.04771900  | -0.53444800 |
| P | -0.46935200 | 0.20509800  | 1.15506600  |
| C | 2.10148800  | 1.55817900  | -0.11291300 |
| C | 3.10947300  | 1.74421900  | -1.27085900 |
| C | 2.84838900  | 1.50832200  | 1.23211000  |
| H | 2.59338300  | 1.79424800  | -2.23815200 |
| H | 3.65991000  | 2.68654600  | -1.12569700 |
| H | 3.84397900  | 0.93297800  | -1.31663000 |
| H | 2.16157100  | 1.33260400  | 2.06968500  |
| H | 3.61550100  | 0.72467000  | 1.23858200  |
| H | 3.35702800  | 2.46964600  | 1.40565200  |
| C | 1.88082500  | -1.59256700 | -0.04732100 |
| C | 3.23060400  | -1.67962300 | -0.78746000 |
| C | 0.93702500  | -2.68958800 | -0.59555600 |
| H | 3.97093900  | -0.99355600 | -0.35854500 |
| H | 3.63167000  | -2.70055600 | -0.69463800 |
| H | 3.12213700  | -1.45268400 | -1.85637800 |
| H | -0.04335800 | -2.65099700 | -0.10191000 |

|   |             |             |             |
|---|-------------|-------------|-------------|
| H | 0.78459800  | -2.58357200 | -1.67728900 |
| H | 1.37404900  | -3.68092200 | -0.40145000 |
| C | -1.93443400 | -0.30246700 | 0.44467000  |
| C | -2.21943900 | -0.71264400 | -0.98013800 |
| C | -3.17349700 | -0.29184200 | 1.32234600  |
| C | -3.31135400 | 0.20054100  | -1.59597000 |
| H | -2.59276900 | -1.75169100 | -0.97704700 |
| H | -1.30839400 | -0.68402600 | -1.58804300 |
| C | -4.26275600 | 0.62757700  | 0.71411200  |
| H | -3.57474100 | -1.31869500 | 1.37874000  |
| H | -2.92790200 | 0.02357100  | 2.34483100  |
| C | -4.58426300 | 0.21960600  | -0.73337600 |
| H | -3.53745400 | -0.14428000 | -2.61462000 |
| H | -2.90588200 | 1.21987600  | -1.67943800 |
| H | -5.16572900 | 0.58760500  | 1.33942400  |
| H | -3.89671800 | 1.66501700  | 0.73285300  |
| H | -5.32546300 | 0.90679400  | -1.16554200 |
| H | -5.03930000 | -0.78416900 | -0.73489900 |
| C | 1.14400300  | 2.77396100  | -0.12089600 |
| H | 0.55566400  | 2.81348300  | -1.04772200 |
| H | 0.44704600  | 2.74792600  | 0.72718400  |
| H | 1.73322700  | 3.70061200  | -0.04887400 |
| C | 2.09562800  | -1.84395200 | 1.45848700  |
| H | 2.55775500  | -2.83411100 | 1.59694700  |
| H | 2.75345400  | -1.09863000 | 1.91576500  |
| H | 1.14339500  | -1.83827200 | 2.00453300  |

### E.3.12. Reaction of **1** with acetophenone leading to **Z-3i**

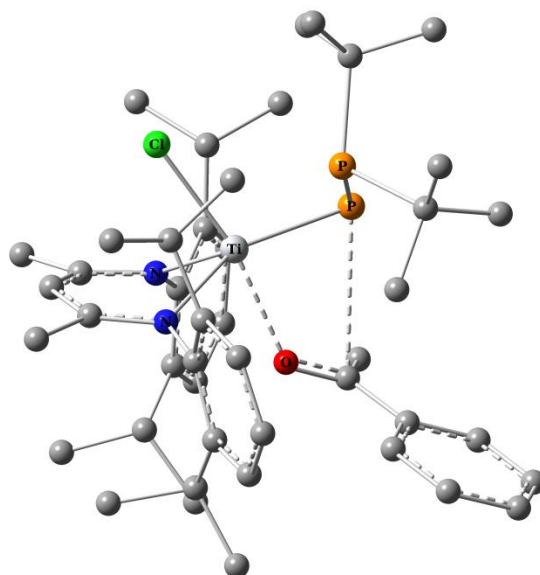

**Figure S207.** Optimized structure of **Z-3iTs1**.

Below are presented xyz coordinates for optimized geometry of **Z-3iTs1**:

|   |            |             |             |
|---|------------|-------------|-------------|
| C | 3.28744800 | 0.17459100  | -0.08180300 |
| C | 3.83421100 | 1.35696900  | 0.48355300  |
| C | 4.89767600 | 1.21813800  | 1.39486600  |
| H | 5.33223400 | 2.11131000  | 1.83957100  |
| C | 5.41802200 | -0.03611500 | 1.72908500  |
| H | 6.24644600 | -0.11454200 | 2.43152700  |
| C | 4.87186200 | -1.18837000 | 1.15397700  |
| H | 5.28102200 | -2.16333400 | 1.41525600  |
| C | 3.79656200 | -1.11091900 | 0.25392400  |
| C | 3.36323500 | 2.75173200  | 0.08140400  |
| H | 2.37159600 | 2.65479400  | -0.38061100 |
| C | 3.23395200 | 3.70427600  | 1.28579100  |
| H | 2.81824400 | 4.66237900  | 0.95003000  |

|   |             |             |             |
|---|-------------|-------------|-------------|
| H | 2.56378100  | 3.28877600  | 2.04731800  |
| H | 4.21034500  | 3.91197400  | 1.74547800  |
| C | 4.32211000  | 3.37323300  | -0.96139200 |
| H | 3.94920600  | 4.35871400  | -1.27007100 |
| H | 5.32617400  | 3.50267400  | -0.53299200 |
| H | 4.41331300  | 2.74817100  | -1.85474400 |
| C | 3.21859900  | -2.38894000 | -0.35112700 |
| H | 2.25413800  | -2.13134200 | -0.80486500 |
| C | 2.96826200  | -3.48556000 | 0.70418700  |
| H | 2.54650000  | -4.37497600 | 0.21981900  |
| H | 3.89823000  | -3.79345600 | 1.20010700  |
| H | 2.26239300  | -3.15430800 | 1.47313800  |
| C | 4.14383700  | -2.94849900 | -1.45673800 |
| H | 4.31056000  | -2.21629700 | -2.25276500 |
| H | 5.12212900  | -3.22203400 | -1.03743300 |
| H | 3.69875400  | -3.84655400 | -1.90565200 |
| C | -1.68554300 | -1.58154900 | -1.63067300 |
| C | -1.68761100 | -2.88082000 | -1.04701000 |
| C | -2.92997100 | -3.50170200 | -0.82107500 |
| H | -2.95672600 | -4.48771600 | -0.36271800 |
| C | -4.13382100 | -2.88565000 | -1.18221700 |
| H | -5.08311000 | -3.38063900 | -0.98290400 |
| C | -4.10418800 | -1.65362600 | -1.83755400 |
| H | -5.03607800 | -1.19759200 | -2.17015700 |
| C | -2.89055900 | -0.99144700 | -2.09669800 |
| C | -0.38523100 | -3.62384300 | -0.73336700 |
| H | 0.27639800  | -2.90784800 | -0.22928800 |
| C | -0.57449500 | -4.85041200 | 0.18246300  |
| H | 0.40856500  | -5.24302800 | 0.46935900  |
| H | -1.11931800 | -4.61509600 | 1.10308600  |
| H | -1.10916400 | -5.65720500 | -0.33869400 |
| C | 0.32667500  | -4.10312200 | -2.02283800 |
| H | 1.17453800  | -4.74940200 | -1.75823600 |
| H | -0.36069700 | -4.68507700 | -2.65147200 |
| H | 0.72040500  | -3.27020900 | -2.61066300 |
| C | -2.91433500 | 0.27685900  | -2.94812200 |
| H | -1.88217100 | 0.60994600  | -3.10440200 |
| C | -3.65641500 | 1.43521500  | -2.26118900 |
| H | -3.69012300 | 2.30970200  | -2.92340000 |
| H | -4.68873500 | 1.15337300  | -2.00939000 |
| H | -3.12779400 | 1.72355400  | -1.34655400 |
| C | -3.56583300 | -0.00464300 | -4.32443000 |
| H | -3.43667000 | 0.86542000  | -4.98193100 |
| H | -3.13140600 | -0.88182600 | -4.81796300 |
| H | -4.64417700 | -0.18469300 | -4.21632500 |
| C | 3.83188700  | 0.29250000  | -2.88541000 |
| H | 4.61547100  | 0.22866500  | -2.12555200 |
| H | 4.06434400  | -0.39445900 | -3.70598800 |
| H | 3.83315800  | 1.31306200  | -3.29395000 |
| C | 2.45188300  | 0.01770100  | -2.31699400 |
| C | 1.48353300  | -0.43618600 | -3.21504800 |
| H | 1.80882100  | -0.51859000 | -4.25000200 |
| C | 0.18410900  | -0.94172900 | -2.95954300 |
| C | -0.46865800 | -1.60359800 | -4.16396500 |
| H | 0.27403300  | -2.17082300 | -4.73566500 |
| H | -1.28899500 | -2.26799200 | -3.88260700 |
| H | -0.86706400 | -0.81961900 | -4.82201400 |
| C | 0.59317700  | -1.10452800 | 2.21773600  |
| C | -1.66376700 | 4.20260400  | 0.42337800  |
| C | -2.13386600 | 4.88301600  | 1.72623300  |
| H | -3.16181800 | 4.62835800  | 2.00216100  |
| H | -1.47066600 | 4.61915700  | 2.55984800  |
| H | -2.08920200 | 5.97452300  | 1.58740600  |
| C | -0.25162300 | 4.74646300  | 0.12314400  |
| H | 0.18789800  | 4.28226000  | -0.76312000 |
| H | -0.33053500 | 5.83187000  | -0.04644900 |
| H | 0.41631500  | 4.57561600  | 0.97485600  |
| C | -3.06124500 | 1.66858400  | 1.68388300  |



|    |             |             |             |
|----|-------------|-------------|-------------|
| C  | -3.09593600 | 0.16505100  | 1.35902100  |
| H  | -2.10281200 | -0.27134800 | 1.51152100  |
| H  | -3.80128100 | -0.35419500 | 2.02519300  |
| H  | -3.39254700 | -0.02141600 | 0.32161000  |
| C  | -4.41406900 | 2.28474700  | 1.27132400  |
| H  | -4.49389000 | 3.34755300  | 1.52187300  |
| H  | -4.60756800 | 2.16492500  | 0.20021900  |
| H  | -5.21404000 | 1.75769000  | 1.81438100  |
| Cl | 0.17969300  | 2.23411200  | -2.18428500 |
| N  | 2.18627500  | 0.23735800  | -1.00506600 |
| N  | -0.44012100 | -0.86645700 | -1.77306800 |
| O  | 0.45162900  | -1.05960200 | 0.96217600  |
| P  | 0.23620400  | 1.82829500  | 1.65907400  |
| P  | -1.56468600 | 2.28798900  | 0.62899900  |
| Ti | 0.26896400  | 0.69961800  | -0.40141800 |
| C  | -2.82747200 | 1.84814300  | 3.19621700  |
| H  | -2.80785900 | 2.90326700  | 3.48951600  |
| H  | -3.64063500 | 1.35213300  | 3.74968700  |
| H  | -1.87423400 | 1.39211500  | 3.49326300  |
| C  | -2.59965400 | 4.53830500  | -0.75636500 |
| H  | -2.21353200 | 4.10107600  | -1.68433600 |
| H  | -3.62016900 | 4.17138500  | -0.59517400 |
| H  | -2.65071700 | 5.63106900  | -0.88186600 |
| C  | -0.42743400 | -1.79400900 | 3.03785800  |
| C  | -1.51733400 | -2.41789100 | 2.39557700  |
| C  | -0.34311100 | -1.84553700 | 4.44849500  |
| C  | -2.50050900 | -3.07418500 | 3.13708300  |
| H  | -1.58284800 | -2.36842500 | 1.31314600  |
| C  | -1.33067800 | -2.49892400 | 5.19064600  |
| H  | 0.48347500  | -1.36805000 | 4.96737700  |
| C  | -2.41121500 | -3.11467800 | 4.53707700  |
| H  | -3.33658100 | -3.54482300 | 2.62311000  |
| H  | -1.26220700 | -2.52623000 | 6.27625000  |
| H  | -3.18010600 | -3.62047600 | 5.11864200  |
| C  | 1.84878600  | -0.60501200 | 2.88768600  |
| H  | 2.47428300  | -1.47120700 | 3.15388000  |
| H  | 2.41098200  | 0.03961700  | 2.21395600  |
| H  | 1.61335800  | -0.05534100 | 3.80354200  |

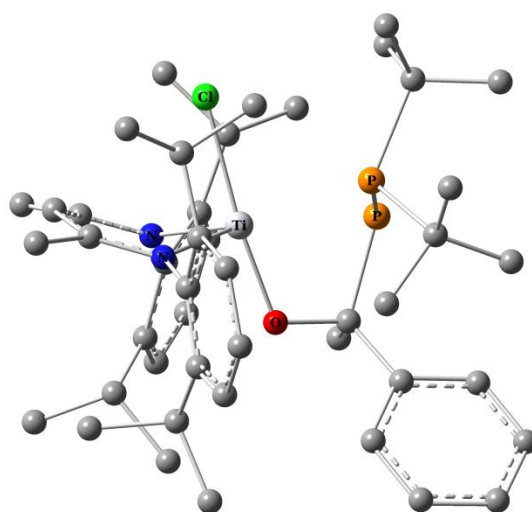

**Figure S208.** Optimized structure of **Z-3ir**.

Below are presented xyz coordinates for optimized geometry of **Z-3ir**:

|   |             |             |             |
|---|-------------|-------------|-------------|
| C | -3.33340200 | -0.00581800 | -0.40097400 |
| C | -3.77962300 | -1.17971500 | -1.06214600 |
| C | -4.92189100 | -1.82138100 | -0.55275300 |
| H | -5.29099900 | -2.71979700 | -1.04205200 |

|   |             |             |             |
|---|-------------|-------------|-------------|
| C | -5.57445400 | -1.34411200 | 0.59034200  |
| H | -6.45212600 | -1.86318000 | 0.97226800  |
| C | -5.08173000 | -0.21757700 | 1.25561100  |
| H | -5.57363700 | 0.12884600  | 2.16390600  |
| C | -3.95525300 | 0.47360000  | 0.77779700  |
| C | -3.02367100 | -1.75522300 | -2.25682400 |
| H | -1.95886200 | -1.52754200 | -2.09891200 |
| C | -3.12772000 | -3.28845300 | -2.34531300 |
| H | -2.43241900 | -3.65317300 | -3.11123900 |
| H | -2.85993300 | -3.75880200 | -1.39111000 |
| H | -4.13676500 | -3.61784100 | -2.63039800 |
| C | -3.42434800 | -1.10008400 | -3.59501400 |
| H | -2.90688600 | -1.60221300 | -4.42237400 |
| H | -4.50798900 | -1.17902700 | -3.76215200 |
| H | -3.13259300 | -0.04538000 | -3.62268800 |
| C | -3.42050700 | 1.67712100  | 1.55028900  |
| H | -2.54135100 | 2.05592900  | 1.01592700  |
| C | -2.96317800 | 1.26560700  | 2.96730700  |
| H | -2.62699500 | 2.14969500  | 3.52498200  |
| H | -3.78628600 | 0.80718500  | 3.53200400  |
| H | -2.13424400 | 0.55408400  | 2.91217800  |
| C | -4.46289600 | 2.81349500  | 1.64839200  |
| H | -4.81473300 | 3.13561800  | 0.66107100  |
| H | -5.33949600 | 2.49445400  | 2.22840300  |
| H | -4.02341000 | 3.68380900  | 2.15356600  |
| C | 1.61953500  | 2.40735500  | 0.07700000  |
| C | 1.64494900  | 2.67410800  | 1.47075800  |
| C | 2.88037400  | 2.99178100  | 2.06106800  |
| H | 2.92733100  | 3.18881000  | 3.12907400  |
| C | 4.05444500  | 3.06416200  | 1.30335600  |
| H | 5.00242300  | 3.29764800  | 1.78522400  |
| C | 3.99799000  | 2.85382000  | -0.07573800 |
| H | 4.90562300  | 2.94078400  | -0.67162100 |
| C | 2.78656000  | 2.54234000  | -0.71916600 |
| C | 0.35896500  | 2.69180700  | 2.29494600  |
| H | -0.23007000 | 1.81144300  | 2.00206400  |
| C | 0.61162800  | 2.63959600  | 3.81498400  |
| H | -0.33351800 | 2.45522400  | 4.34041300  |
| H | 1.31774800  | 1.84816000  | 4.09223900  |
| H | 1.01278600  | 3.59452700  | 4.18291500  |
| C | -0.48342300 | 3.95372000  | 1.98455200  |
| H | -1.35916900 | 3.99172900  | 2.64601200  |
| H | 0.11098200  | 4.86210400  | 2.15238000  |
| H | -0.84603600 | 3.96046000  | 0.95250800  |
| C | 2.77762700  | 2.40591400  | -2.23901900 |
| H | 1.74213400  | 2.27524300  | -2.57344800 |
| C | 3.54186400  | 1.14882300  | -2.68086000 |
| H | 3.48959900  | 1.02794700  | -3.77034200 |
| H | 4.60001600  | 1.20661900  | -2.38845300 |
| H | 3.09052400  | 0.26823100  | -2.21464500 |
| C | 3.37625400  | 3.65341300  | -2.92973700 |
| H | 3.22436300  | 3.58638600  | -4.01522200 |
| H | 2.92282700  | 4.58526000  | -2.57181900 |
| H | 4.45770800  | 3.72062300  | -2.74976800 |
| C | -3.91298600 | 2.12878800  | -2.09229200 |
| H | -4.48641600 | 2.60521200  | -1.28737400 |
| H | -3.89669500 | 2.81272900  | -2.94743600 |
| H | -4.44056200 | 1.21092900  | -2.36572500 |
| C | -2.49512900 | 1.84674900  | -1.63330300 |
| C | -1.53147800 | 2.83269500  | -1.86801900 |
| H | -1.86304700 | 3.68403700  | -2.45796300 |
| C | -0.26559400 | 2.98697000  | -1.25531600 |
| C | 0.32241200  | 4.38207300  | -1.42017500 |
| H | -0.46657300 | 5.12958300  | -1.28087300 |
| H | 1.13254600  | 4.58306300  | -0.71648500 |
| H | 0.71018800  | 4.49641100  | -2.44049100 |
| C | -0.55717200 | -1.69118800 | 1.48200200  |
| C | 2.14242800  | -2.82487700 | -2.30795000 |

|    |             |             |             |
|----|-------------|-------------|-------------|
| C  | 2.79982300  | -4.13633300 | -1.82930300 |
| H  | 3.81629000  | -3.99011700 | -1.45091100 |
| H  | 2.19477200  | -4.61858400 | -1.05157000 |
| H  | 2.86282900  | -4.82216000 | -2.68785000 |
| C  | 0.82022200  | -3.22116000 | -3.00781700 |
| H  | 0.23698600  | -2.35131200 | -3.31920900 |
| H  | 1.08787400  | -3.80047100 | -3.90514600 |
| H  | 0.19883800  | -3.85877300 | -2.36890200 |
| C  | 3.31647800  | -1.74228400 | 0.41866100  |
| C  | 3.11805600  | -0.51986800 | 1.33940000  |
| H  | 2.12217900  | -0.50022600 | 1.78848500  |
| H  | 3.85418700  | -0.55522200 | 2.15610900  |
| H  | 3.26412900  | 0.40980300  | 0.78257100  |
| C  | 4.66344800  | -1.55590400 | -0.31449000 |
| H  | 4.91794500  | -2.40191900 | -0.96213400 |
| H  | 4.67817900  | -0.63740600 | -0.91042000 |
| H  | 5.45366200  | -1.47196700 | 0.44715900  |
| Cl | -0.05284900 | 0.08393100  | -3.03027900 |
| N  | -2.21248900 | 0.72644000  | -0.93480700 |
| N  | 0.36691400  | 2.03323100  | -0.54269800 |
| O  | -0.58383800 | -0.28966100 | 1.13876500  |
| P  | -0.05157700 | -2.55626800 | -0.15192600 |
| P  | 1.83549800  | -1.62200000 | -0.80295900 |
| Ti | -0.32070600 | 0.00729200  | -0.68921500 |
| C  | 3.35128800  | -3.03393000 | 1.25451700  |
| H  | 3.60037300  | -3.91345900 | 0.65420900  |
| H  | 4.12096900  | -2.92637200 | 2.03438700  |
| H  | 2.39520400  | -3.21149700 | 1.75147900  |
| C  | 3.03363600  | -2.12653800 | -3.35570800 |
| H  | 2.51295800  | -1.26658400 | -3.78912200 |
| H  | 3.99095700  | -1.79027900 | -2.94331400 |
| H  | 3.24797500  | -2.84260700 | -4.16371400 |
| C  | 0.21949900  | -1.94749800 | 2.75947800  |
| C  | 0.55263600  | -0.88932200 | 3.61615600  |
| C  | 0.50033300  | -3.26535900 | 3.16723100  |
| C  | 1.18247800  | -1.13338000 | 4.84481300  |
| H  | 0.31713800  | 0.12127500  | 3.30113300  |
| C  | 1.12417400  | -3.51328700 | 4.39533700  |
| H  | 0.24350300  | -4.09527500 | 2.50829500  |
| C  | 1.47369600  | -2.44619400 | 5.23905200  |
| H  | 1.44191600  | -0.29708700 | 5.49296300  |
| H  | 1.34421700  | -4.53804500 | 4.69094000  |
| H  | 1.96431600  | -2.63873200 | 6.19161600  |
| C  | -1.99882600 | -2.19605800 | 1.73651900  |
| H  | -2.44812600 | -1.62352000 | 2.55554700  |
| H  | -2.62082500 | -2.09646500 | 0.84451000  |
| H  | -1.96466500 | -3.25281900 | 2.02560300  |

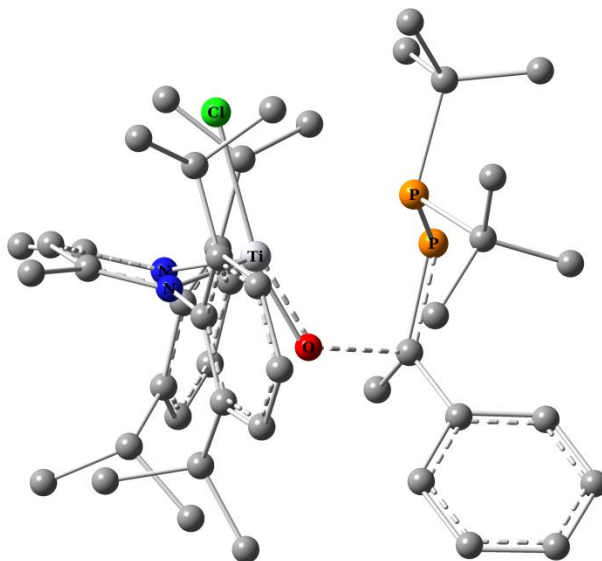

**Figure S209.** Optimized structure of **Z-3irs2**.

Below are presented xyz coordinates for optimized geometry of **Z-3irs2**:

|   |             |             |             |
|---|-------------|-------------|-------------|
| C | -3.21316100 | -0.03810900 | -0.35964500 |
| C | -3.60958000 | -1.17791500 | -1.10669200 |
| C | -4.70410800 | -1.92077100 | -0.62969500 |
| H | -5.03545600 | -2.79576700 | -1.18324400 |
| C | -5.36613500 | -1.56962400 | 0.55355300  |
| H | -6.20783500 | -2.16508100 | 0.90369700  |
| C | -4.93111900 | -0.46622200 | 1.29148900  |
| H | -5.43359300 | -0.20950300 | 2.22363300  |
| C | -3.85272400 | 0.32149700  | 0.85148100  |
| C | -2.87416200 | -1.58896500 | -2.38013200 |
| H | -1.80537500 | -1.40545300 | -2.19600000 |
| C | -3.02859400 | -3.08593700 | -2.69877200 |
| H | -2.37889000 | -3.34505000 | -3.54298000 |
| H | -2.73931200 | -3.70594500 | -1.84133700 |
| H | -4.05823500 | -3.33776100 | -2.98987100 |
| C | -3.27400200 | -0.74117200 | -3.60762600 |
| H | -2.77219800 | -1.13375600 | -4.50137600 |
| H | -4.35996600 | -0.77779300 | -3.77474100 |
| H | -2.96010400 | 0.30040200  | -3.49413200 |
| C | -3.40161500 | 1.51307000  | 1.69335900  |
| H | -2.56655900 | 1.99935700  | 1.17519600  |
| C | -2.88830700 | 1.04932400  | 3.07313800  |
| H | -2.62113000 | 1.91701500  | 3.69025300  |
| H | -3.65743900 | 0.47913700  | 3.61137900  |
| H | -2.00158300 | 0.41799100  | 2.96076400  |
| C | -4.53117100 | 2.55067800  | 1.88079000  |
| H | -4.94136000 | 2.88683400  | 0.92143500  |
| H | -5.35850900 | 2.13023900  | 2.46845500  |
| H | -4.14962900 | 3.42950600  | 2.41759700  |
| C | 1.52999100  | 2.56985500  | 0.24428800  |
| C | 1.57800000  | 2.65610600  | 1.66251600  |
| C | 2.82874200  | 2.85024900  | 2.26983300  |
| H | 2.89447500  | 2.90922300  | 3.35315600  |
| C | 3.99779000  | 2.96874000  | 1.50829900  |
| H | 4.95809500  | 3.10593700  | 2.00278400  |
| C | 3.92599500  | 2.92115000  | 0.11553800  |
| H | 4.83401700  | 3.03134700  | -0.47546000 |
| C | 2.69896600  | 2.73182300  | -0.54659300 |
| C | 0.30023800  | 2.58869800  | 2.49218900  |
| H | -0.29420300 | 1.75531700  | 2.09178800  |
| C | 0.56473500  | 2.33107900  | 3.98706300  |
| H | -0.38038200 | 2.11160700  | 4.49842600  |

|    |             |             |             |
|----|-------------|-------------|-------------|
| H  | 1.24262200  | 1.48378800  | 4.14035400  |
| H  | 1.00488700  | 3.21330700  | 4.47303200  |
| C  | -0.52825800 | 3.88770300  | 2.34269600  |
| H  | -1.41686800 | 3.84276200  | 2.98625300  |
| H  | 0.06760500  | 4.75994700  | 2.64421100  |
| H  | -0.86984500 | 4.03775100  | 1.31402400  |
| C  | 2.67800900  | 2.72800000  | -2.07148700 |
| H  | 1.63770300  | 2.66086300  | -2.40798200 |
| C  | 3.39475800  | 1.48386900  | -2.62382700 |
| H  | 3.33004500  | 1.45806800  | -3.71873600 |
| H  | 4.45536300  | 1.47804200  | -2.33505500 |
| H  | 2.91386400  | 0.57886000  | -2.23999700 |
| C  | 3.31195700  | 4.01172200  | -2.65425800 |
| H  | 3.16804200  | 4.03607500  | -3.74241200 |
| H  | 2.87165200  | 4.91978300  | -2.22467300 |
| H  | 4.39268600  | 4.04287400  | -2.46071600 |
| C  | -3.97283600 | 2.17219400  | -1.86813400 |
| H  | -4.50755700 | 2.74007800  | -1.09641700 |
| H  | -3.99603100 | 2.76257000  | -2.79135500 |
| H  | -4.50677100 | 1.23226600  | -2.02337500 |
| C  | -2.52827200 | 1.95157800  | -1.45011200 |
| C  | -1.66380700 | 3.04987500  | -1.63026800 |
| H  | -2.08890400 | 3.90265300  | -2.15444500 |
| C  | -0.40474600 | 3.26077800  | -1.04684200 |
| C  | 0.15814800  | 4.66704500  | -1.13164000 |
| H  | -0.64824900 | 5.40055300  | -1.02424300 |
| H  | 0.91511400  | 4.84795200  | -0.36328200 |
| H  | 0.62315700  | 4.82205700  | -2.11371600 |
| C  | -0.48769700 | -2.24717400 | 1.40344800  |
| C  | 1.89157300  | -2.72078200 | -2.58261400 |
| C  | 2.59019400  | -4.07751800 | -2.34442300 |
| H  | 3.62277700  | -3.96352700 | -1.99719600 |
| H  | 2.03870400  | -4.68736400 | -1.61759800 |
| H  | 2.62149900  | -4.62487500 | -3.29882400 |
| C  | 0.53263100  | -3.00286600 | -3.26396700 |
| H  | -0.05309900 | -2.08620400 | -3.38296100 |
| H  | 0.73743900  | -3.41416900 | -4.26448900 |
| H  | -0.05905600 | -3.73800800 | -2.70818000 |
| C  | 3.22655500  | -1.83886500 | 0.12602300  |
| C  | 3.06454000  | -0.69933400 | 1.15475800  |
| H  | 2.16010700  | -0.80947800 | 1.75635000  |
| H  | 3.93063600  | -0.69893100 | 1.83348000  |
| H  | 3.02810000  | 0.27530800  | 0.65369100  |
| C  | 4.48473100  | -1.53018100 | -0.71259000 |
| H  | 4.72600500  | -2.32800900 | -1.42313000 |
| H  | 4.40065500  | -0.58358400 | -1.25372900 |
| H  | 5.33295400  | -1.44012500 | -0.01643400 |
| Cl | 0.08148200  | 0.48162800  | -3.00444500 |
| N  | -2.15175800 | 0.80490300  | -0.85179000 |
| N  | 0.26577500  | 2.28752600  | -0.39523500 |
| O  | -0.30124300 | -0.31570900 | 0.97999900  |
| P  | -0.11549500 | -2.97381200 | -0.19470500 |
| P  | 1.59372700  | -1.79954200 | -0.91397600 |
| Ti | -0.15220100 | 0.30652000  | -0.62266500 |
| C  | 3.42975800  | -3.18557700 | 0.84242100  |
| H  | 3.63429500  | -3.99821900 | 0.13803100  |
| H  | 4.29129900  | -3.09746200 | 1.52251400  |
| H  | 2.55701900  | -3.45736900 | 1.43826000  |
| C  | 2.72129100  | -1.85647600 | -3.55756600 |
| H  | 2.18316500  | -0.93760500 | -3.80900200 |
| H  | 3.70864400  | -1.59684500 | -3.16605800 |
| H  | 2.87041300  | -2.43368900 | -4.48290200 |
| C  | 0.35419300  | -2.31722500 | 2.64415400  |
| C  | 0.49231900  | -1.23705600 | 3.53483600  |
| C  | 0.86838600  | -3.57398700 | 3.02545400  |
| C  | 1.16644900  | -1.39532000 | 4.75115800  |
| H  | 0.09494000  | -0.27247300 | 3.23712800  |
| C  | 1.53409600  | -3.73467700 | 4.24819300  |

|   |             |             |            |
|---|-------------|-------------|------------|
| H | 0.73210900  | -4.42164800 | 2.35515400 |
| C | 1.69410600  | -2.64389000 | 5.11344800 |
| H | 1.27904700  | -0.54183600 | 5.41821500 |
| H | 1.92987300  | -4.71239900 | 4.51861600 |
| H | 2.21817600  | -2.76527000 | 6.05988700 |
| C | -1.95704300 | -2.38830700 | 1.77653800 |
| H | -2.24278100 | -1.58829500 | 2.46634400 |
| H | -2.61150100 | -2.37092200 | 0.90329400 |
| H | -2.08810300 | -3.33967500 | 2.31355400 |

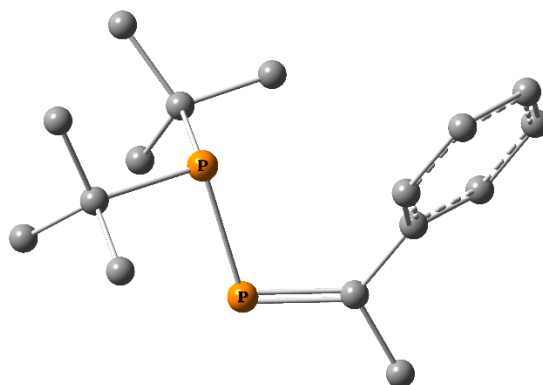

**Figure S210.** Optimized structure of **Z-3i**.

Below are presented xyz coordinates for optimized geometry of **Z-3i**:

|   |             |             |             |
|---|-------------|-------------|-------------|
| C | 2.95083100  | 0.11804800  | 2.18617700  |
| C | 2.13664300  | -0.61612200 | 1.31754600  |
| C | 2.30964300  | -0.52808800 | -0.08046700 |
| C | 3.33152800  | 0.31016000  | -0.57862400 |
| C | 4.13041300  | 1.06202700  | 0.29085300  |
| C | 3.94424100  | 0.96771800  | 1.67759700  |
| H | 2.80582500  | 0.02940900  | 3.26139800  |
| H | 4.89851500  | 1.71828600  | -0.11493700 |
| C | 1.45901400  | -1.31090400 | -1.00971200 |
| P | -0.24976000 | -1.36463200 | -1.10575400 |
| P | -0.95158700 | 0.13293000  | 0.40743500  |
| C | -1.26555300 | 1.63637100  | -0.75985200 |
| C | 0.13748800  | 2.27094200  | -0.90968000 |
| C | -1.81610500 | 1.33019800  | -2.16654000 |
| C | -2.19491900 | 2.63701900  | -0.04388700 |
| H | 0.57486600  | 2.52092800  | 0.06484500  |
| H | 0.82629900  | 1.59020900  | -1.42532200 |
| H | 0.05986700  | 3.19236500  | -1.50698500 |
| H | -2.81260900 | 0.87908400  | -2.13613400 |
| H | -1.88674400 | 2.26930900  | -2.73761700 |
| H | -1.15158800 | 0.65231400  | -2.71804600 |
| H | -2.19196200 | 3.59111800  | -0.59292200 |
| H | -3.23029500 | 2.27661600  | -0.01291100 |
| H | -1.86248700 | 2.83550400  | 0.98369000  |
| C | -2.61680200 | -0.71074100 | 0.86943000  |
| C | -3.23662400 | 0.08438800  | 2.04201400  |
| C | -3.65011400 | -0.87284300 | -0.25982300 |
| C | -2.22138900 | -2.10752300 | 1.40602300  |
| H | -2.51709400 | 0.20130900  | 2.86254800  |
| H | -3.57095300 | 1.08151900  | 1.73628800  |
| H | -4.11287500 | -0.45926200 | 2.42750900  |
| H | -3.22458400 | -1.39318800 | -1.12722000 |
| H | -4.50443500 | -1.46430300 | 0.10538300  |
| H | -4.03948200 | 0.09723400  | -0.59126000 |
| H | -3.10588900 | -2.59339300 | 1.84490300  |
| H | -1.83954100 | -2.75795200 | 0.60759300  |
| H | -1.45167500 | -2.03242900 | 2.18649300  |
| H | 1.36651700  | -1.27328800 | 1.71213600  |

|   |            |             |             |
|---|------------|-------------|-------------|
| H | 3.47859400 | 0.39853700  | -1.65377600 |
| H | 4.57046200 | 1.54581300  | 2.35467400  |
| C | 2.21453600 | -2.15792900 | -2.01992100 |
| H | 1.53175700 | -2.72433100 | -2.66344700 |
| H | 2.84755100 | -1.52619900 | -2.66050800 |
| H | 2.88518800 | -2.85600900 | -1.49839200 |

### E.3.13. Reaction of **1** with acetophenone leading to **E-3i**

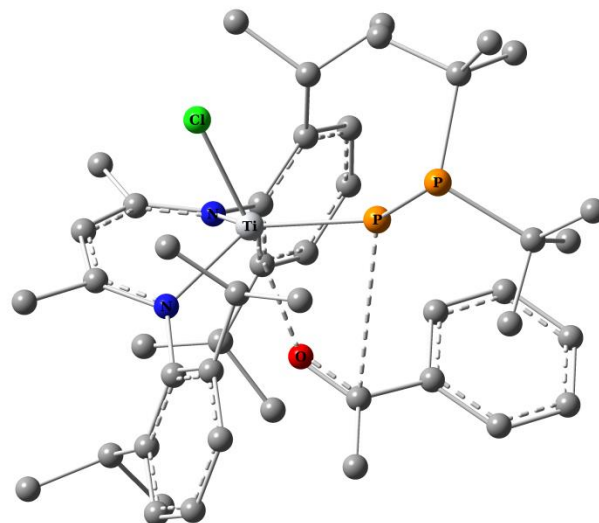

**Figure S211.** Optimized structure of **E-3iTs1**.

Below are presented xyz coordinates for optimized geometry of **E-3iTs1**:

|   |             |             |             |
|---|-------------|-------------|-------------|
| C | -0.80386500 | -2.82156400 | -0.68075500 |
| C | 0.38841700  | -3.44022400 | -1.14154700 |
| C | 0.74394800  | -4.67930600 | -0.58208100 |
| H | 1.64960900  | -5.17597700 | -0.92184900 |
| C | -0.04380400 | -5.28946100 | 0.40068000  |
| H | 0.24539200  | -6.25618400 | 0.81019500  |
| C | -1.18641000 | -4.64016900 | 0.87314300  |
| H | -1.77337000 | -5.09941300 | 1.66623500  |
| C | -1.58057600 | -3.39020000 | 0.36295700  |
| C | 1.26574700  | -2.78320300 | -2.20082600 |
| H | 1.27741300  | -1.70247600 | -1.97527100 |
| C | 2.72922100  | -3.25340600 | -2.14011100 |
| H | 3.34096800  | -2.63104400 | -2.80314600 |
| H | 3.13183600  | -3.16805700 | -1.12325900 |
| H | 2.83740700  | -4.29544400 | -2.47295400 |
| C | 0.70674000  | -2.95187300 | -3.62835000 |
| H | 1.40229100  | -2.51018400 | -4.35318600 |
| H | 0.57136900  | -4.01460800 | -3.87314900 |
| H | -0.25011600 | -2.43451700 | -3.74029400 |
| C | -2.78531700 | -2.67351800 | 0.97090000  |
| H | -2.71101300 | -1.61687900 | 0.68785400  |
| C | -2.75671700 | -2.75408000 | 2.51322000  |
| H | -3.54774300 | -2.12394300 | 2.93640800  |
| H | -2.93336300 | -3.77939600 | 2.86506000  |
| H | -1.79285100 | -2.41953200 | 2.91112700  |
| C | -4.12986200 | -3.23264900 | 0.45319500  |
| H | -4.23833100 | -3.10499100 | -0.62837600 |
| H | -4.21620700 | -4.30446600 | 0.67993300  |
| H | -4.96569200 | -2.71285100 | 0.94129200  |
| C | -2.32432000 | 2.36346500  | -0.09137300 |
| C | -3.47577800 | 2.34364700  | 0.74007500  |
| C | -3.70112800 | 3.44261400  | 1.58966600  |
| H | -4.58024400 | 3.44128200  | 2.23317500  |
| C | -2.81154800 | 4.51795600  | 1.64108900  |

|    |             |             |             |
|----|-------------|-------------|-------------|
| H  | -3.00030600 | 5.35527200  | 2.31086800  |
| C  | -1.66943500 | 4.50870300  | 0.83043800  |
| H  | -0.97609300 | 5.34484900  | 0.87659600  |
| C  | -1.40555200 | 3.44487000  | -0.04584300 |
| C  | -4.44893800 | 1.16801500  | 0.79429900  |
| H  | -4.12288100 | 0.40948700  | 0.07376900  |
| C  | -4.42565800 | 0.50990400  | 2.19056900  |
| H  | -5.10350000 | -0.35399400 | 2.21350800  |
| H  | -3.41612400 | 0.16800100  | 2.43557700  |
| H  | -4.75269000 | 1.21693100  | 2.96500200  |
| C  | -5.89082000 | 1.59110800  | 0.43380000  |
| H  | -6.54662600 | 0.71057700  | 0.40476900  |
| H  | -6.29468400 | 2.28455800  | 1.18380100  |
| H  | -5.93776800 | 2.08960400  | -0.54088500 |
| C  | -0.19927700 | 3.48025600  | -0.97515900 |
| H  | 0.25312700  | 2.46373100  | -0.99859200 |
| C  | 0.92751600  | 4.40630900  | -0.49088600 |
| H  | 1.81629600  | 4.25516600  | -1.11171700 |
| H  | 0.63051700  | 5.46255400  | -0.56148700 |
| H  | 1.20617200  | 4.18473700  | 0.54564600  |
| C  | -0.62545900 | 3.85471900  | -2.41003300 |
| H  | 0.23900200  | 3.81588300  | -3.08334700 |
| H  | -1.38042600 | 3.16306700  | -2.79621100 |
| H  | -1.04082400 | 4.87198500  | -2.42025000 |
| C  | -2.76054600 | -2.85884400 | -2.77122500 |
| H  | -2.42725900 | -3.74481100 | -2.22581400 |
| H  | -3.85239400 | -2.87118700 | -2.85655700 |
| H  | -2.34740500 | -2.91062700 | -3.78790300 |
| C  | -2.28489300 | -1.57274500 | -2.11503700 |
| C  | -2.96206900 | -0.39311300 | -2.48702500 |
| H  | -3.69180300 | -0.51418900 | -3.28546500 |
| C  | -2.91763900 | 0.89825200  | -1.91633600 |
| C  | -3.88994500 | 1.91582000  | -2.48607600 |
| H  | -4.89526700 | 1.49080200  | -2.58314600 |
| H  | -3.93486200 | 2.82288300  | -1.87887700 |
| H  | -3.54514600 | 2.18865600  | -3.49363300 |
| C  | -0.50383900 | 0.15306400  | 2.49003500  |
| C  | 4.54913600  | 0.76865200  | -1.59638000 |
| C  | 5.19746800  | -0.53297200 | -1.09714000 |
| H  | 5.93507000  | -0.34298800 | -0.30775700 |
| H  | 4.43968300  | -1.22414500 | -0.70980000 |
| H  | 5.72256200  | -1.02845500 | -1.92960200 |
| C  | 3.68442500  | 0.47003700  | -2.83819500 |
| H  | 3.18522400  | 1.37394800  | -3.20913200 |
| H  | 4.32588200  | 0.07397800  | -3.64113500 |
| H  | 2.90314900  | -0.26263600 | -2.61184600 |
| C  | 4.14420100  | 1.58596900  | 1.41615400  |
| C  | 3.18871800  | 2.45958000  | 2.26262800  |
| H  | 2.17635900  | 2.03409900  | 2.25686300  |
| H  | 3.54479600  | 2.49398500  | 3.30417000  |
| H  | 3.13660200  | 3.48632500  | 1.87776100  |
| C  | 5.53456800  | 2.25289700  | 1.39151100  |
| H  | 6.28201100  | 1.61279700  | 0.90718900  |
| H  | 5.51273400  | 3.22021100  | 0.87135600  |
| H  | 5.87105000  | 2.43017300  | 2.42485000  |
| Cl | 0.17401900  | 0.61469900  | -3.31979600 |
| N  | -1.22981200 | -1.57608800 | -1.26343100 |
| N  | -2.04298200 | 1.25052600  | -0.94453700 |
| O  | -0.99768500 | -0.11245600 | 1.37733200  |
| P  | 1.68028200  | 0.28831600  | -0.05717100 |
| P  | 3.36403300  | 1.63451100  | -0.35192900 |
| Ti | -0.28521700 | 0.21498400  | -1.13883700 |
| C  | 4.23646300  | 0.19618400  | 2.07440000  |
| H  | 4.94012800  | -0.46251800 | 1.55598500  |
| H  | 4.57923900  | 0.30698700  | 3.11552500  |
| H  | 3.25464000  | -0.29196400 | 2.08752000  |
| C  | 5.63650100  | 1.78941800  | -2.00690100 |
| H  | 5.18373400  | 2.72171900  | -2.36893100 |



|   |             |             |             |
|---|-------------|-------------|-------------|
| H | 6.31579000  | 2.03473800  | -1.18354700 |
| H | 6.24015100  | 1.36329100  | -2.82348000 |
| C | 0.50243100  | -0.74765700 | 3.09910900  |
| C | 1.08299100  | -0.48090300 | 4.35788700  |
| C | 0.92597400  | -1.87986800 | 2.36787900  |
| C | 2.05893900  | -1.33575100 | 4.88005300  |
| H | 0.77936300  | 0.39558200  | 4.92625500  |
| C | 1.89802400  | -2.73477200 | 2.89355800  |
| H | 0.48264000  | -2.07094800 | 1.39655900  |
| C | 2.46617000  | -2.46353900 | 4.14800800  |
| H | 2.50623000  | -1.12291000 | 5.84917100  |
| H | 2.21521300  | -3.60289900 | 2.31965700  |
| H | 3.22931100  | -3.12553200 | 4.55451200  |
| C | -0.88873400 | 1.43441500  | 3.20039900  |
| H | -1.26537700 | 1.23325100  | 4.21230800  |
| H | -0.00396300 | 2.07861800  | 3.29797200  |
| H | -1.64867800 | 1.96045600  | 2.62044600  |

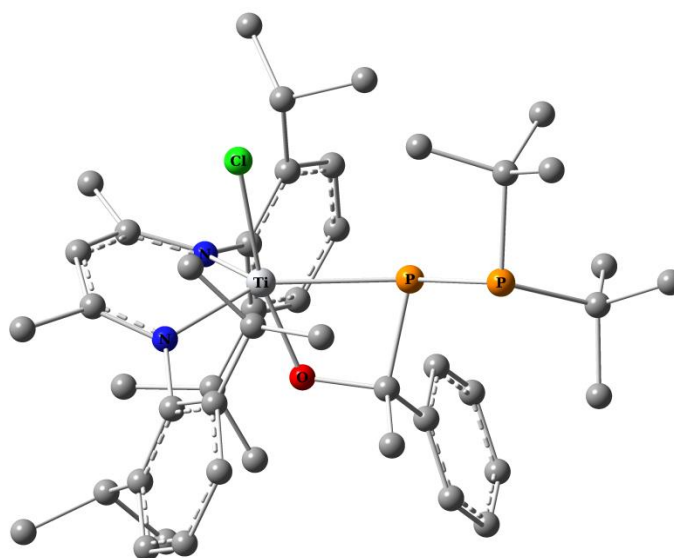

**Figure S212.** Optimized structure of *E-3ii*.

Below are presented xyz coordinates for optimized geometry of *E-3ii*:

|   |             |             |             |
|---|-------------|-------------|-------------|
| C | -1.03988500 | -2.66711600 | -0.99992700 |
| C | -0.08537600 | -3.29389800 | -1.83875800 |
| C | 0.41649600  | -4.54721900 | -1.44342500 |
| H | 1.15949400  | -5.03957000 | -2.06932800 |
| C | -0.02732900 | -5.17115400 | -0.27531900 |
| H | 0.36881300  | -6.14497800 | 0.00921700  |
| C | -0.97839500 | -4.53798300 | 0.53252700  |
| H | -1.30606100 | -5.02129900 | 1.44952900  |
| C | -1.49182900 | -3.27371100 | 0.20169200  |
| C | 0.40189100  | -2.67475900 | -3.14391300 |
| H | -0.15827800 | -1.74865000 | -3.31415400 |
| C | 1.89625400  | -2.29508000 | -3.05761700 |
| H | 2.20735900  | -1.77778600 | -3.97443400 |
| H | 2.07814900  | -1.63154600 | -2.20468800 |
| H | 2.52061000  | -3.19171900 | -2.93619800 |
| C | 0.15861400  | -3.61506300 | -4.34615400 |
| H | 0.41832400  | -3.10092200 | -5.28092500 |
| H | 0.78064500  | -4.51774000 | -4.27655000 |
| H | -0.88861000 | -3.93781400 | -4.40686300 |
| C | -2.50866800 | -2.57924600 | 1.10248100  |
| H | -2.30653300 | -1.50384600 | 1.02800800  |
| C | -2.36538600 | -2.98546900 | 2.58154900  |
| H | -3.02828900 | -2.36979400 | 3.20023400  |
| H | -2.65242500 | -4.03386300 | 2.74443700  |

|    |             |             |             |
|----|-------------|-------------|-------------|
| H  | -1.33857300 | -2.84620400 | 2.93581200  |
| C  | -3.95640800 | -2.83650400 | 0.62240800  |
| H  | -4.12685700 | -2.44901200 | -0.38836400 |
| H  | -4.17912100 | -3.91247800 | 0.62063100  |
| H  | -4.66983700 | -2.34088700 | 1.29506500  |
| C  | -2.31964600 | 2.49386800  | 0.25391500  |
| C  | -3.30248300 | 2.39936400  | 1.26941300  |
| C  | -3.41853600 | 3.46324200  | 2.18185600  |
| H  | -4.16900100 | 3.40704700  | 2.96916900  |
| C  | -2.57192200 | 4.57134900  | 2.11435300  |
| H  | -2.67655400 | 5.38577200  | 2.82920600  |
| C  | -1.56315000 | 4.61515500  | 1.14459100  |
| H  | -0.88156900 | 5.46164600  | 1.12328400  |
| C  | -1.40707800 | 3.57989800  | 0.20960100  |
| C  | -4.14205600 | 1.14447600  | 1.48416200  |
| H  | -3.98413200 | 0.46649400  | 0.63672200  |
| C  | -3.64127800 | 0.42210400  | 2.75615300  |
| H  | -4.22329000 | -0.49280500 | 2.92595700  |
| H  | -2.58313100 | 0.15706500  | 2.65760200  |
| H  | -3.75995300 | 1.06773800  | 3.63691900  |
| C  | -5.65368600 | 1.43660500  | 1.59746900  |
| H  | -6.21260200 | 0.49425900  | 1.66713600  |
| H  | -5.87913200 | 2.02382700  | 2.49764600  |
| H  | -6.03173400 | 1.99634500  | 0.73261900  |
| C  | -0.29447900 | 3.63186200  | -0.83373800 |
| H  | 0.13244500  | 2.61041300  | -0.93577500 |
| C  | 0.88609600  | 4.53330400  | -0.43047900 |
| H  | 1.68884400  | 4.43603300  | -1.16966200 |
| H  | 0.58866200  | 5.59053800  | -0.40678000 |
| H  | 1.29711400  | 4.25800800  | 0.54768900  |
| C  | -0.83838500 | 4.04455100  | -2.21651300 |
| H  | -0.02992200 | 4.04376500  | -2.95731400 |
| H  | -1.60728000 | 3.34904800  | -2.56681800 |
| H  | -1.26855900 | 5.05397900  | -2.15904400 |
| C  | -3.12516500 | -2.41234800 | -2.92782400 |
| H  | -2.53135200 | -2.52239500 | -3.84543500 |
| H  | -3.01512000 | -3.33612900 | -2.35092800 |
| H  | -4.17368100 | -2.27732200 | -3.21035600 |
| C  | -2.61618800 | -1.21554900 | -2.15166000 |
| C  | -3.29090900 | 0.01344200  | -2.34086300 |
| H  | -4.08613900 | -0.00611500 | -3.08174000 |
| C  | -3.17513900 | 1.21700900  | -1.61481600 |
| C  | -4.23218500 | 2.27905600  | -1.84186400 |
| H  | -5.05172000 | 2.16655800  | -1.12121200 |
| H  | -3.81432900 | 3.28265800  | -1.71081000 |
| H  | -4.65123000 | 2.18151200  | -2.84868100 |
| C  | 0.77356300  | 0.16059100  | 1.59785100  |
| C  | 4.28076700  | 1.56941700  | -1.47372600 |
| C  | 4.98982700  | 0.29737900  | -1.97540600 |
| H  | 5.89552400  | 0.06728000  | -1.40330600 |
| H  | 4.31975000  | -0.56975800 | -1.93554600 |
| H  | 5.29048600  | 0.44623700  | -3.02454900 |
| C  | 3.13368900  | 1.88374700  | -2.45172800 |
| H  | 2.50084500  | 2.70635400  | -2.09789500 |
| H  | 3.55459400  | 2.17267100  | -3.42719200 |
| H  | 2.48985600  | 1.01381700  | -2.60517600 |
| C  | 4.69571800  | 0.43275500  | 1.39761800  |
| C  | 4.17805800  | 0.60963900  | 2.84309900  |
| H  | 3.21156900  | 0.11577200  | 2.98644000  |
| H  | 4.88937300  | 0.14128400  | 3.54077600  |
| H  | 4.08195200  | 1.67027600  | 3.11112200  |
| C  | 6.10857200  | 1.05251000  | 1.33232800  |
| H  | 6.59691600  | 0.88019700  | 0.36688700  |
| H  | 6.08399600  | 2.13394000  | 1.52427900  |
| H  | 6.73548800  | 0.58707200  | 2.10832500  |
| Cl | -0.01768900 | 0.85473700  | -3.06138300 |
| N  | -1.55468500 | -1.35668100 | -1.33169500 |
| N  | -2.19446900 | 1.43407300  | -0.71008300 |

|    |             |             |             |
|----|-------------|-------------|-------------|
| O  | -0.52476300 | 0.00201800  | 0.96122500  |
| P  | 1.81223400  | 0.07190600  | -0.02228000 |
| P  | 3.50488700  | 1.48676800  | 0.28520300  |
| Ti | -0.52576100 | 0.31829000  | -0.86733300 |
| C  | 4.75748000  | -1.07646200 | 1.09376700  |
| H  | 5.16623000  | -1.28853500 | 0.10172000  |
| H  | 5.40219400  | -1.56665500 | 1.84053000  |
| H  | 3.76102400  | -1.53013500 | 1.15602100  |
| C  | 5.25715800  | 2.77098700  | -1.48103300 |
| H  | 4.74237900  | 3.69364900  | -1.18328700 |
| H  | 6.11268300  | 2.62771200  | -0.81295300 |
| H  | 5.64654100  | 2.90895600  | -2.50159500 |
| C  | 0.98356600  | -1.02726400 | 2.53248700  |
| C  | 0.90159000  | -0.90008300 | 3.93145800  |
| C  | 1.23207700  | -2.30229400 | 1.98893400  |
| C  | 1.08897700  | -2.01257500 | 4.76601500  |
| H  | 0.70303100  | 0.07044900  | 4.38046400  |
| C  | 1.42072400  | -3.41336500 | 2.81767500  |
| H  | 1.28156100  | -2.41383500 | 0.90661300  |
| C  | 1.35562100  | -3.27242900 | 4.21246900  |
| H  | 1.03042300  | -1.89095600 | 5.84667400  |
| H  | 1.61256000  | -4.38730200 | 2.37130300  |
| H  | 1.50796900  | -4.13468400 | 4.85977500  |
| C  | 0.75555200  | 1.52587600  | 2.28615000  |
| H  | -0.08692100 | 1.57912000  | 2.98898300  |
| H  | 1.69052400  | 1.72882000  | 2.81801000  |
| H  | 0.61643900  | 2.30580600  | 1.53281500  |

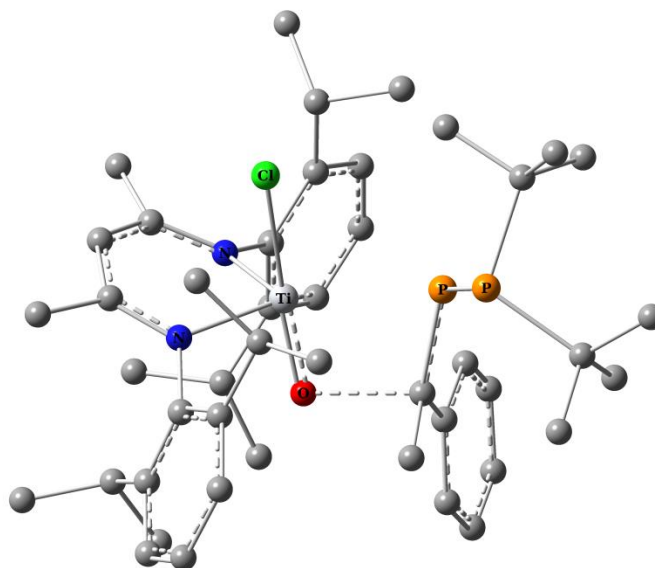

**Figure S213.** Optimized structure of *E-3iTs2*.

Below are presented xyz coordinates for optimized geometry of *E-3iTs2*.

|   |             |             |             |
|---|-------------|-------------|-------------|
| C | -2.13803000 | -2.18331800 | -0.72456100 |
| C | -1.50549400 | -3.26492400 | -1.39132100 |
| C | -1.63947200 | -4.55225500 | -0.83753500 |
| H | -1.15826200 | -5.39299400 | -1.33550400 |
| C | -2.38133500 | -4.76940500 | 0.32449100  |
| H | -2.47842100 | -5.77484500 | 0.73226600  |
| C | -2.99714100 | -3.68928000 | 0.96756000  |
| H | -3.56148000 | -3.86408400 | 1.88018300  |
| C | -2.88314000 | -2.38255800 | 0.46931500  |
| C | -0.70781100 | -3.09830000 | -2.67946000 |
| H | -0.73761100 | -2.04261000 | -2.97287200 |
| C | 0.77362400  | -3.47121200 | -2.45854900 |
| H | 1.35279100  | -3.27177800 | -3.36880200 |

|   |             |             |             |
|---|-------------|-------------|-------------|
| H | 1.20469800  | -2.88448000 | -1.63945500 |
| H | 0.87791800  | -4.53705400 | -2.20996200 |
| C | -1.29590600 | -3.94941300 | -3.82843800 |
| H | -0.76839900 | -3.72598500 | -4.76507400 |
| H | -1.17862000 | -5.02268700 | -3.62477300 |
| H | -2.36506900 | -3.75568300 | -3.97813800 |
| C | -3.55605200 | -1.21216400 | 1.17608800  |
| H | -2.89855200 | -0.34456600 | 1.03737100  |
| C | -3.70885800 | -1.44932000 | 2.68943200  |
| H | -4.07334200 | -0.53673800 | 3.17438500  |
| H | -4.43573000 | -2.24475000 | 2.90718800  |
| H | -2.74968200 | -1.71911100 | 3.14416500  |
| C | -4.92823600 | -0.89062000 | 0.53982600  |
| H | -4.82928300 | -0.61057200 | -0.51496100 |
| H | -5.59999700 | -1.75773900 | 0.60577800  |
| H | -5.40087500 | -0.05034800 | 1.06643800  |
| C | -1.04672800 | 3.09980500  | -0.11826100 |
| C | -2.02885500 | 3.47935800  | 0.83004000  |
| C | -1.75464600 | 4.56949000  | 1.67448600  |
| H | -2.50559000 | 4.88165800  | 2.39936100  |
| C | -0.53267900 | 5.24237300  | 1.61226300  |
| H | -0.33541600 | 6.08468300  | 2.27360500  |
| C | 0.44857100  | 4.81377800  | 0.71052500  |
| H | 1.40777500  | 5.32473900  | 0.68720900  |
| C | 0.22146400  | 3.73671200  | -0.16295500 |
| C | -3.33806000 | 2.71767200  | 1.00142500  |
| H | -3.32701600 | 1.86009800  | 0.31862900  |
| C | -3.44438200 | 2.16608100  | 2.43938400  |
| H | -4.37943300 | 1.60373500  | 2.55835400  |
| H | -2.60123500 | 1.50091600  | 2.65569500  |
| H | -3.44959600 | 2.98003800  | 3.17678100  |
| C | -4.56714100 | 3.59035700  | 0.66479800  |
| H | -5.48750100 | 2.99726500  | 0.75174200  |
| H | -4.64581900 | 4.44010700  | 1.35676600  |
| H | -4.51075600 | 3.99120000  | -0.35378100 |
| C | 1.30465000  | 3.28599100  | -1.14015700 |
| H | 1.34216200  | 2.18129600  | -1.12766300 |
| C | 2.71235000  | 3.78325900  | -0.76913500 |
| H | 3.44875600  | 3.29619800  | -1.41697900 |
| H | 2.79967800  | 4.87060900  | -0.90682500 |
| H | 2.97628300  | 3.53856100  | 0.26719800  |
| C | 0.96941300  | 3.70165700  | -2.58850700 |
| H | 1.77186600  | 3.38071600  | -3.26397300 |
| H | 0.04568000  | 3.22952700  | -2.93202300 |
| H | 0.86535100  | 4.79384100  | -2.65351100 |
| C | -3.72660700 | -1.31738900 | -2.94777900 |
| H | -3.18834600 | -1.75554300 | -3.79873500 |
| H | -4.05342200 | -2.13781600 | -2.30079800 |
| H | -4.60162700 | -0.78588100 | -3.33494800 |
| C | -2.80436000 | -0.36597800 | -2.21403000 |
| C | -2.83712500 | 0.98880500  | -2.60044100 |
| H | -3.50231300 | 1.21870600  | -3.42961200 |
| C | -2.23324200 | 2.10730900  | -1.98428600 |
| C | -2.66458400 | 3.47429800  | -2.48391600 |
| H | -2.23045100 | 3.63352900  | -3.48094600 |
| H | -3.75446600 | 3.52796300  | -2.58363000 |
| H | -2.31863400 | 4.27582400  | -1.82673200 |
| C | 1.09384100  | -0.25361800 | 1.70212900  |
| C | 4.49610000  | -0.89144800 | -1.47088700 |
| C | 4.65207600  | -2.36396200 | -1.04097200 |
| H | 5.36393100  | -2.49319600 | -0.21826200 |
| H | 3.68880200  | -2.78594300 | -0.72837400 |
| H | 5.01972200  | -2.95139600 | -1.89682900 |
| C | 3.50250700  | -0.82422600 | -2.64619400 |
| H | 3.36152000  | 0.20324700  | -3.00037300 |
| H | 3.89495100  | -1.42850900 | -3.47866900 |
| H | 2.51605400  | -1.21386100 | -2.38255800 |
| C | 4.84653100  | 0.05259000  | 1.49645200  |

|    |             |             |             |
|----|-------------|-------------|-------------|
| C  | 4.83754700  | 1.42461500  | 2.21788200  |
| H  | 3.83511600  | 1.77773600  | 2.46511200  |
| H  | 5.41038400  | 1.34626400  | 3.15502100  |
| H  | 5.31299200  | 2.18934500  | 1.59028200  |
| C  | 6.33268700  | -0.21756700 | 1.16982800  |
| H  | 6.49928200  | -1.19633600 | 0.71062200  |
| H  | 6.75308800  | 0.55851700  | 0.51941100  |
| H  | 6.89559200  | -0.19570700 | 2.11574600  |
| Cl | 0.44963500  | 0.30466200  | -2.88121600 |
| N  | -2.00959900 | -0.83625400 | -1.23171600 |
| N  | -1.32462100 | 1.99647000  | -1.00089700 |
| O  | -0.75520600 | 0.34158700  | 1.04879300  |
| P  | 1.89834600  | -0.90380500 | 0.21106900  |
| P  | 3.78532200  | 0.31043300  | -0.12731000 |
| Ti | -0.38990200 | 0.21460400  | -0.63061100 |
| C  | 4.34554700  | -1.06553400 | 2.42968800  |
| H  | 4.33178000  | -2.03633600 | 1.92034800  |
| H  | 5.01783700  | -1.13996100 | 3.29904800  |
| H  | 3.33504300  | -0.88029200 | 2.80868800  |
| C  | 5.83798700  | -0.32697400 | -1.99944200 |
| H  | 5.75925200  | 0.74813700  | -2.20911300 |
| H  | 6.67619600  | -0.48893200 | -1.31793800 |
| H  | 6.07711600  | -0.83758800 | -2.94452900 |
| C  | 0.46165500  | -1.24373000 | 2.62254100  |
| C  | 0.08328400  | -0.86580400 | 3.93046100  |
| C  | 0.26373200  | -2.58725900 | 2.23285200  |
| C  | -0.43794200 | -1.80555100 | 4.82703100  |
| H  | 0.19902500  | 0.16465400  | 4.25483900  |
| C  | -0.28159200 | -3.51842700 | 3.11887500  |
| H  | 0.54563900  | -2.89742600 | 1.22821800  |
| C  | -0.62182900 | -3.13680000 | 4.42624700  |
| H  | -0.70785600 | -1.49484700 | 5.83488900  |
| H  | -0.43570000 | -4.54304400 | 2.78801000  |
| H  | -1.03024000 | -3.86731200 | 5.12254800  |
| C  | 1.42260900  | 1.10798300  | 2.27376800  |
| H  | 0.51278800  | 1.58562900  | 2.65055000  |
| H  | 2.13257300  | 1.00142200  | 3.10412500  |
| H  | 1.85974600  | 1.75503700  | 1.50806800  |

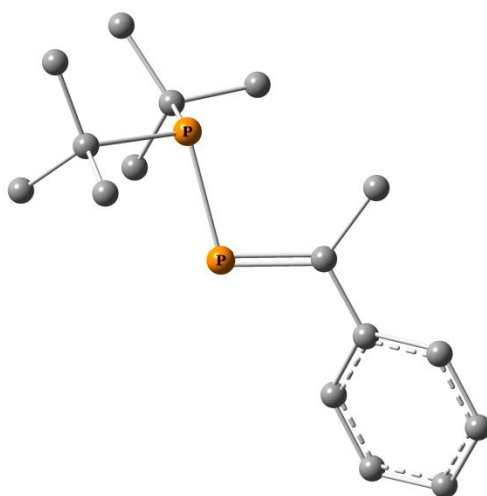

**Figure S214.** Optimized structure of *E-3i*.

Below are presented xyz coordinates for optimized geometry of *E-3i*:

|   |             |             |             |
|---|-------------|-------------|-------------|
| C | -4.49558700 | 0.07540800  | 1.61193800  |
| C | -3.17662700 | 0.15969300  | 1.15843400  |
| C | -2.85383100 | -0.04546800 | -0.20578800 |
| C | -3.92038600 | -0.30688300 | -1.09952400 |
| C | -5.24080200 | -0.39139400 | -0.64425300 |

|   |             |             |             |
|---|-------------|-------------|-------------|
| C | -5.53679500 | -0.20350100 | 0.71339200  |
| H | -4.71351100 | 0.24436000  | 2.66509200  |
| H | -6.03943600 | -0.60590900 | -1.35243500 |
| C | -1.44730200 | 0.01293800  | -0.67928400 |
| P | -0.22894500 | -0.47625100 | 0.43568400  |
| P | 1.67309900  | -0.05297000 | -0.65398500 |
| C | 2.13314200  | 1.64551500  | 0.14127700  |
| C | 1.29925200  | 2.66589500  | -0.66915300 |
| C | 1.80002600  | 1.82366100  | 1.63574600  |
| C | 3.63127800  | 1.92255000  | -0.09597900 |
| H | 1.52587700  | 2.60877300  | -1.74145300 |
| H | 0.22300000  | 2.49636700  | -0.53184200 |
| H | 1.52703700  | 3.68438000  | -0.31985600 |
| H | 2.35251400  | 1.12651800  | 2.27281300  |
| H | 2.06353300  | 2.84744100  | 1.94450100  |
| H | 0.72807400  | 1.68071000  | 1.82424800  |
| H | 3.84909300  | 2.97360000  | 0.14803200  |
| H | 4.26446500  | 1.29664200  | 0.54431400  |
| H | 3.91458500  | 1.75085800  | -1.14284900 |
| C | 2.75267800  | -1.45521800 | 0.09248700  |
| C | 4.10636500  | -1.45796400 | -0.65517500 |
| C | 2.99073900  | -1.40532900 | 1.61255000  |
| C | 2.01267200  | -2.76612800 | -0.26658200 |
| H | 3.95667600  | -1.50714100 | -1.74125900 |
| H | 4.70620000  | -0.56912900 | -0.43222200 |
| H | 4.68834900  | -2.34045600 | -0.34818300 |
| H | 2.04584000  | -1.35774400 | 2.16840800  |
| H | 3.52613000  | -2.31384900 | 1.92976400  |
| H | 3.60751800  | -0.54418300 | 1.89636900  |
| H | 2.65234900  | -3.62463700 | -0.01223000 |
| H | 1.07158200  | -2.86783800 | 0.29003500  |
| H | 1.78408800  | -2.81569300 | -1.33978900 |
| H | -2.37702700 | 0.40858300  | 1.85383400  |
| H | -3.71589700 | -0.47044900 | -2.15475800 |
| H | -6.56550300 | -0.26072900 | 1.06428800  |
| C | -1.24223700 | 0.45825700  | -2.11052200 |
| H | -1.74435800 | -0.23455700 | -2.80182100 |
| H | -1.68724100 | 1.45091900  | -2.27069700 |
| H | -0.18178200 | 0.48926800  | -2.37519000 |

### E.3.14. Reaction of **1** with cyclopropyl methyl ketone leading to **Z-3j**

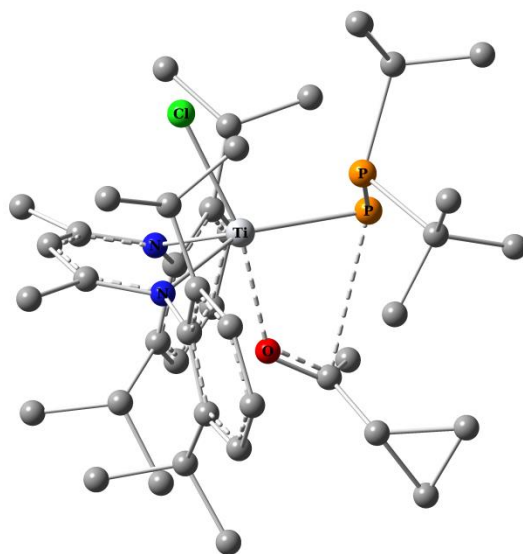

**Figure S215.** Optimized structure of **Z-3j**<sub>TS1</sub>.

Below are presented xyz coordinates for optimized geometry of **Z-3j**<sub>TS1</sub>:

|   |             |             |             |
|---|-------------|-------------|-------------|
| C | 3.13777400  | 0.50134600  | -0.51721500 |
| C | 3.50835500  | 1.86592800  | -0.39506500 |
| C | 4.69290500  | 2.16731000  | 0.30360500  |
| H | 4.99885300  | 3.20722300  | 0.40237200  |
| C | 5.48780900  | 1.16146600  | 0.86193100  |
| H | 6.40476500  | 1.41926100  | 1.38986300  |
| C | 5.09852700  | -0.17787500 | 0.74180900  |
| H | 5.71763800  | -0.95697000 | 1.18509200  |
| C | 3.91798400  | -0.53409100 | 0.06944300  |
| C | 2.70423800  | 2.98823900  | -1.04418800 |
| H | 1.70260800  | 2.59924200  | -1.27172900 |
| C | 2.53188800  | 4.20719900  | -0.11786100 |
| H | 1.86467100  | 4.93583100  | -0.59500800 |
| H | 2.08355500  | 3.91496600  | 0.83877000  |
| H | 3.48974600  | 4.71028000  | 0.07536500  |
| C | 3.35305700  | 3.43062400  | -2.37594700 |
| H | 2.74135800  | 4.20948500  | -2.84971400 |
| H | 4.35811600  | 3.83941800  | -2.19911100 |
| H | 3.44484300  | 2.59541900  | -3.07746300 |
| C | 3.50623000  | -2.00314000 | -0.02812500 |
| H | 2.45496600  | -2.02720800 | -0.33876300 |
| C | 3.61712700  | -2.73945300 | 1.32342600  |
| H | 3.26518000  | -3.77288200 | 1.21249800  |
| H | 4.65509100  | -2.78304400 | 1.67937000  |
| H | 3.00909700  | -2.25922000 | 2.09778900  |
| C | 4.34455000  | -2.75652400 | -1.08660900 |
| H | 4.24823900  | -2.30143100 | -2.07713700 |
| H | 5.40865300  | -2.75048400 | -0.81189100 |
| H | 4.01369800  | -3.80159200 | -1.15738900 |
| C | -1.66797700 | -2.20994900 | -0.62196200 |
| C | -1.45487800 | -3.16828300 | 0.40695500  |
| C | -2.57885800 | -3.78169100 | 0.98753900  |
| H | -2.43844300 | -4.50643300 | 1.78639100  |
| C | -3.87654200 | -3.49346000 | 0.55017400  |
| H | -4.73304200 | -3.96991000 | 1.02451100  |
| C | -4.05990400 | -2.61707600 | -0.52105200 |
| H | -5.06516400 | -2.42732600 | -0.89550000 |
| C | -2.97080700 | -1.97606600 | -1.13883700 |
| C | -0.04517500 | -3.60117500 | 0.80608600  |
| H | 0.57184700  | -2.69698600 | 0.84742500  |
| C | 0.02147900  | -4.30794700 | 2.17461200  |
| H | 1.06902600  | -4.41172400 | 2.48445700  |
| H | -0.51265000 | -3.75627400 | 2.95854500  |
| H | -0.40938800 | -5.31790300 | 2.12641800  |
| C | 0.56690300  | -4.54097000 | -0.26144500 |
| H | 1.53763800  | -4.92167200 | 0.08428100  |
| H | -0.09182900 | -5.40072100 | -0.44484700 |
| H | 0.73287900  | -4.02131700 | -1.20926300 |
| C | -3.23431500 | -1.11527800 | -2.37168100 |
| H | -2.27464500 | -0.75020200 | -2.75429600 |
| C | -4.07639000 | 0.12474700  | -2.03282800 |
| H | -4.23061500 | 0.73817400  | -2.92961600 |
| H | -5.06173100 | -0.15997600 | -1.63681700 |
| H | -3.55257200 | 0.73115200  | -1.28781800 |
| C | -3.94206900 | -1.93306400 | -3.47900500 |
| H | -3.99360200 | -1.34180200 | -4.40306200 |
| H | -3.42511600 | -2.87483500 | -3.69686900 |
| H | -4.97098000 | -2.18009400 | -3.18376500 |
| C | 3.28839400  | -0.17596800 | -3.29859100 |
| H | 3.51872200  | -1.02885900 | -3.94567400 |
| H | 3.05963100  | 0.68355400  | -3.94467800 |
| H | 4.16932300  | 0.07579000  | -2.70105000 |
| C | 2.07071000  | -0.45203600 | -2.43685300 |
| C | 1.09708300  | -1.30356100 | -2.96150800 |
| H | 1.29959700  | -1.68706000 | -3.95945400 |
| C | -0.04354300 | -1.86705500 | -2.33283100 |
| C | -0.66887100 | -3.00654700 | -3.12631700 |
| H | 0.11667900  | -3.66293900 | -3.51805800 |

|    |             |             |             |
|----|-------------|-------------|-------------|
| H  | -1.36752600 | -3.59923400 | -2.53173500 |
| H  | -1.20897100 | -2.58983600 | -3.98653500 |
| C  | 1.19691000  | -0.31528300 | 2.42207700  |
| C  | -2.57910200 | 3.60840200  | -0.15678700 |
| C  | -3.10721600 | 4.48894400  | 0.99410100  |
| H  | -4.03380500 | 4.10717400  | 1.43599700  |
| H  | -2.35346600 | 4.59262700  | 1.78458800  |
| H  | -3.32146800 | 5.49249500  | 0.59436500  |
| C  | -1.36024700 | 4.33798800  | -0.76082000 |
| H  | -0.87749700 | 3.74844400  | -1.54486100 |
| H  | -1.71019200 | 5.28757700  | -1.19566900 |
| H  | -0.61740000 | 4.56209700  | 0.01334400  |
| C  | -3.16507000 | 1.27398300  | 1.89993100  |
| C  | -2.77719200 | -0.20684700 | 2.07679800  |
| H  | -1.69831300 | -0.30025200 | 2.24099900  |
| H  | -3.30035000 | -0.62935700 | 2.94896600  |
| H  | -3.04382600 | -0.79840700 | 1.19639200  |
| C  | -4.65300400 | 1.34321000  | 1.50029300  |
| H  | -5.01008400 | 2.37140700  | 1.37497700  |
| H  | -4.84346300 | 0.79339500  | 0.57213000  |
| H  | -5.25635700 | 0.87761600  | 2.29510100  |
| Cl | -0.50277300 | 1.44187200  | -2.48253200 |
| N  | 1.94220700  | 0.12775700  | -1.21965700 |
| N  | -0.54493200 | -1.47179400 | -1.15128000 |
| O  | 0.96848200  | -0.65206600 | 1.22784500  |
| P  | -0.04765400 | 2.12318400  | 1.27680700  |
| P  | -2.00060000 | 1.87284300  | 0.48133300  |
| Ti | 0.08292400  | 0.49659500  | -0.41593000 |
| C  | -2.92217100 | 2.00859800  | 3.23255100  |
| H  | -3.26917800 | 3.04600300  | 3.20917200  |
| H  | -3.46617500 | 1.48778600  | 4.03705800  |
| H  | -1.85165200 | 2.01009400  | 3.47599200  |
| C  | -3.65442900 | 3.44349500  | -1.24970200 |
| H  | -3.24450400 | 2.90949400  | -2.11373900 |
| H  | -4.53701600 | 2.90145900  | -0.88908600 |
| H  | -3.98436500 | 4.43971100  | -1.58341800 |
| C  | 2.35181300  | 0.58631400  | 2.77129200  |
| H  | 3.23264200  | -0.04953500 | 2.95111200  |
| H  | 2.58441100  | 1.25060300  | 1.93789700  |
| H  | 2.15623300  | 1.17170900  | 3.67515300  |
| C  | 0.41331500  | -0.95166800 | 3.48864800  |
| C  | 0.99781200  | -1.15189300 | 4.89448200  |
| C  | -0.04530400 | -0.10895700 | 4.69074400  |
| H  | -0.29256400 | -1.69362500 | 3.13121200  |
| H  | 2.02607600  | -0.83650700 | 5.05464800  |
| H  | 0.72215000  | -2.08469600 | 5.38108900  |
| H  | -1.06377100 | -0.30283400 | 5.01639500  |
| H  | 0.24085300  | 0.93950300  | 4.68189400  |



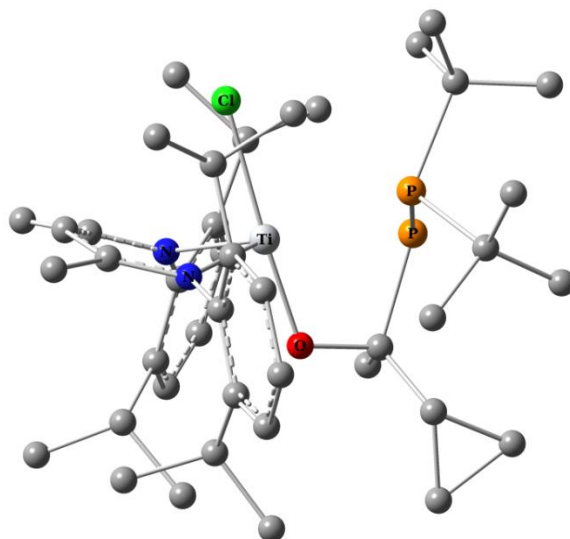

**Figure S216.** Optimized structure of **Z-3jr**.

Below are presented xyz coordinates for optimized geometry of **Z-3jr**:

|   |             |             |             |
|---|-------------|-------------|-------------|
| C | -3.22408800 | -0.11888800 | -0.55899600 |
| C | -3.62913500 | -1.45862500 | -0.79537400 |
| C | -4.83677700 | -1.88971300 | -0.21978700 |
| H | -5.17434200 | -2.90946000 | -0.38938600 |
| C | -5.59989600 | -1.03947300 | 0.58934700  |
| H | -6.52866500 | -1.39717400 | 1.03105800  |
| C | -5.15501400 | 0.26001200  | 0.84817600  |
| H | -5.73695700 | 0.90672300  | 1.50405500  |
| C | -3.96268000 | 0.74703600  | 0.28534000  |
| C | -2.77102000 | -2.41107600 | -1.62340600 |
| H | -1.71946000 | -2.15186900 | -1.42259600 |
| C | -2.93587200 | -3.88331100 | -1.20791400 |
| H | -2.18571700 | -4.49106000 | -1.72806100 |
| H | -2.78750300 | -4.00890500 | -0.12814500 |
| H | -3.92535800 | -4.27855000 | -1.47721800 |
| C | -2.98890500 | -2.23994700 | -3.14087600 |
| H | -2.39678900 | -2.98502900 | -3.68723200 |
| H | -4.04826500 | -2.37527900 | -3.40128700 |
| H | -2.65903900 | -1.25230400 | -3.47826300 |
| C | -3.48905400 | 2.15683700  | 0.63317000  |
| H | -2.55799500 | 2.34843100  | 0.08647800  |
| C | -3.17486200 | 2.27150600  | 2.14175400  |
| H | -2.90141200 | 3.30490800  | 2.39210400  |
| H | -4.05051400 | 2.00101100  | 2.74781200  |
| H | -2.34036400 | 1.61647100  | 2.40833400  |
| C | -4.52379200 | 3.23321100  | 0.23438000  |
| H | -4.79595800 | 3.17158500  | -0.82613300 |
| H | -5.44627600 | 3.12956900  | 0.82172900  |
| H | -4.11513900 | 4.23446500  | 0.42469600  |
| C | 1.79303600  | 2.21502000  | -0.33118800 |
| C | 1.69050600  | 2.89649200  | 0.90696200  |
| C | 2.86410800  | 3.41090100  | 1.48446200  |
| H | 2.80408600  | 3.93171400  | 2.43778800  |
| C | 4.10448100  | 3.27497800  | 0.85233800  |
| H | 5.00343900  | 3.67700800  | 1.31701800  |
| C | 4.18065200  | 2.62673900  | -0.38338600 |
| H | 5.14429300  | 2.53278700  | -0.88238100 |
| C | 3.03665700  | 2.09267900  | -1.00365100 |
| C | 0.33158500  | 3.14544600  | 1.55073000  |
| H | -0.31805200 | 2.30675700  | 1.27945300  |
| C | 0.39497400  | 3.20506500  | 3.08789200  |
| H | -0.62103300 | 3.22075700  | 3.50034500  |
| H | 0.91253400  | 2.32868200  | 3.49527400  |
| H | 0.90966800  | 4.10861900  | 3.44369100  |

|    |             |             |             |
|----|-------------|-------------|-------------|
| C  | -0.28976000 | 4.44454700  | 0.98542300  |
| H  | -1.26006800 | 4.64270000  | 1.45979400  |
| H  | 0.36769100  | 5.30420700  | 1.17578900  |
| H  | -0.45236700 | 4.37069100  | -0.09627300 |
| C  | 3.18371800  | 1.41715100  | -2.36354600 |
| H  | 2.18424600  | 1.18283600  | -2.74797300 |
| C  | 3.92530000  | 0.07721100  | -2.21536700 |
| H  | 3.99075500  | -0.43776900 | -3.18224800 |
| H  | 4.94451600  | 0.23310000  | -1.83357300 |
| H  | 3.37845500  | -0.56655300 | -1.51881000 |
| C  | 3.91896100  | 2.31351400  | -3.38590400 |
| H  | 3.87891500  | 1.85225000  | -4.38146900 |
| H  | 3.48056600  | 3.31677700  | -3.44972000 |
| H  | 4.97769700  | 2.43158500  | -3.11805600 |
| C  | -3.50153400 | 1.34384000  | -2.92969600 |
| H  | -4.13427900 | 2.07929100  | -2.41762200 |
| H  | -3.34818500 | 1.68772800  | -3.95819900 |
| H  | -4.04517400 | 0.39485500  | -2.93679600 |
| C  | -2.16379900 | 1.21595100  | -2.22673600 |
| C  | -1.13080300 | 2.06457800  | -2.63795200 |
| H  | -1.35265700 | 2.68931800  | -3.50002800 |
| C  | 0.07233700  | 2.38366200  | -1.96271700 |
| C  | 0.75112900  | 3.64299200  | -2.48364900 |
| H  | -0.00883800 | 4.37910600  | -2.76704900 |
| H  | 1.42789900  | 4.08808700  | -1.75091500 |
| H  | 1.33174300  | 3.40217500  | -3.38338900 |
| C  | -0.74305400 | -0.98095400 | 2.13618400  |
| C  | 2.21407300  | -3.51366000 | -0.67848200 |
| C  | 2.66843700  | -4.60258300 | 0.31705600  |
| H  | 3.64053800  | -4.39276000 | 0.77311100  |
| H  | 1.92414300  | -4.73775100 | 1.11177200  |
| H  | 2.76032300  | -5.55292900 | -0.23045200 |
| C  | 0.94292100  | -4.05799200 | -1.37249800 |
| H  | 0.49811600  | -3.32936300 | -2.05391700 |
| H  | 1.24295300  | -4.94329500 | -1.95445000 |
| H  | 0.18830400  | -4.37350500 | -0.64351200 |
| C  | 3.22646700  | -1.56625600 | 1.58241000  |
| C  | 3.15826600  | -0.05241700 | 1.88505000  |
| H  | 2.13679100  | 0.31301400  | 2.02020300  |
| H  | 3.73175400  | 0.17116600  | 2.79689800  |
| H  | 3.58937500  | 0.52100800  | 1.05922300  |
| C  | 4.65024500  | -1.83686500 | 1.04521200  |
| H  | 4.84294700  | -2.89609500 | 0.84824700  |
| H  | 4.85354100  | -1.26538800 | 0.13290600  |
| H  | 5.36888200  | -1.50624800 | 1.81089600  |
| Cl | 0.32405900  | -0.95931000 | -2.67498100 |
| N  | -2.02236800 | 0.37773200  | -1.17830900 |
| N  | 0.58812000  | 1.68561900  | -0.93176600 |
| O  | -0.70502500 | 0.17389400  | 1.26268000  |
| P  | -0.11237200 | -2.40489600 | 1.01091600  |
| P  | 1.86685000  | -1.83104900 | 0.24144600  |
| Ti | -0.21310800 | -0.24539000 | -0.48817100 |
| C  | 2.98384900  | -2.40144400 | 2.85486700  |
| H  | 3.16772400  | -3.46628400 | 2.68201800  |
| H  | 3.67445100  | -2.06226800 | 3.64307100  |
| H  | 1.95903600  | -2.29447400 | 3.22128800  |
| C  | 3.27901700  | -3.28291100 | -1.77115600 |
| H  | 2.89506900  | -2.60375600 | -2.53966300 |
| H  | 4.21512100  | -2.87511100 | -1.37579100 |
| H  | 3.50712900  | -4.24839700 | -2.24790900 |
| C  | -2.20998300 | -1.36920100 | 2.39707700  |
| H  | -2.77223100 | -0.51130200 | 2.77963300  |
| H  | -2.69253200 | -1.70400900 | 1.47586400  |
| H  | -2.26317700 | -2.19102200 | 3.12133300  |
| C  | -0.00259000 | -0.65374700 | 3.42091800  |
| C  | -0.70092400 | -0.09729400 | 4.64973500  |
| C  | -0.12515900 | -1.49776400 | 4.67138700  |
| H  | 0.98636800  | -0.24445000 | 3.24877700  |

|   |             |             |            |
|---|-------------|-------------|------------|
| H | -1.78346300 | 0.00268400  | 4.63544900 |
| H | -0.18604500 | 0.68350100  | 5.20597000 |
| H | 0.78069600  | -1.67976800 | 5.24672700 |
| H | -0.82187600 | -2.33349100 | 4.66225200 |

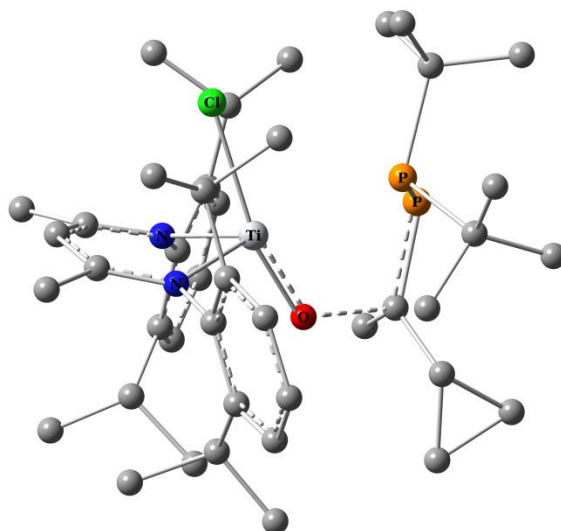

**Figure S217.** Optimized structure of **Z-3jrs2**.

Below are presented xyz coordinates for optimized geometry of **Z-3jrs2**:

|   |             |             |             |
|---|-------------|-------------|-------------|
| C | 3.07511900  | -0.08833800 | -0.62847300 |
| C | 3.52904300  | 1.20230200  | -1.00569000 |
| C | 4.76318700  | 1.63611300  | -0.49056600 |
| H | 5.13974500  | 2.61776200  | -0.76710300 |
| C | 5.51274400  | 0.83780900  | 0.38251500  |
| H | 6.46431100  | 1.19901300  | 0.76962400  |
| C | 5.02852700  | -0.41502300 | 0.76563600  |
| H | 5.60367600  | -1.02556700 | 1.46122400  |
| C | 3.80664700  | -0.90383300 | 0.26952700  |
| C | 2.71168700  | 2.08965800  | -1.94109100 |
| H | 1.65711800  | 1.94803300  | -1.66386600 |
| C | 3.02813200  | 3.58528600  | -1.77107700 |
| H | 2.32737900  | 4.17428200  | -2.37443800 |
| H | 2.92348800  | 3.89602600  | -0.72408000 |
| H | 4.04240100  | 3.83137800  | -2.11614400 |
| C | 2.84934800  | 1.68204600  | -3.42457200 |
| H | 2.30218100  | 2.39722000  | -4.05215700 |
| H | 3.90344500  | 1.68098500  | -3.73696400 |
| H | 2.41616400  | 0.69485500  | -3.60954500 |
| C | 3.30485000  | -2.26979600 | 0.73380200  |
| H | 2.36895700  | -2.48896500 | 0.20613200  |
| C | 2.99278300  | -2.25112300 | 2.24620700  |
| H | 2.71085400  | -3.25564100 | 2.58780600  |
| H | 3.87187700  | -1.93564800 | 2.82516600  |
| H | 2.16357500  | -1.56825400 | 2.45892300  |
| C | 4.31512200  | -3.39658700 | 0.42221500  |
| H | 4.59010800  | -3.41726800 | -0.63893700 |
| H | 5.23870100  | -3.27123200 | 1.00349100  |
| H | 3.88319900  | -4.37162300 | 0.68436600  |
| C | -1.90095600 | -2.28342600 | -0.15993100 |
| C | -1.79179500 | -2.82164300 | 1.14989100  |
| C | -2.97402200 | -3.13866400 | 1.83816700  |
| H | -2.91267700 | -3.54535600 | 2.84484800  |
| C | -4.23006200 | -2.94527100 | 1.25203800  |
| H | -5.13457200 | -3.19494100 | 1.80456300  |
| C | -4.31834900 | -2.43153200 | -0.04346800 |
| H | -5.29674100 | -2.28227000 | -0.49772900 |

|    |             |             |             |
|----|-------------|-------------|-------------|
| C  | -3.16654600 | -2.08958900 | -0.77535600 |
| C  | -0.42683600 | -3.10614800 | 1.76256300  |
| H  | 0.25178700  | -2.31870300 | 1.41414000  |
| C  | -0.44226300 | -3.06426000 | 3.30077900  |
| H  | 0.58263200  | -3.12296400 | 3.68519600  |
| H  | -0.88883400 | -2.13032400 | 3.66206600  |
| H  | -1.00181200 | -3.90758400 | 3.72914800  |
| C  | 0.10966200  | -4.46717300 | 1.26035500  |
| H  | 1.08918000  | -4.68009200 | 1.70867000  |
| H  | -0.57695200 | -5.28025700 | 1.53366500  |
| H  | 0.23090600  | -4.46972700 | 0.17098000  |
| C  | -3.32903400 | -1.50449600 | -2.17353200 |
| H  | -2.33866700 | -1.40904000 | -2.63267600 |
| C  | -3.90803800 | -0.08012900 | -2.08123100 |
| H  | -3.97622500 | 0.37291100  | -3.07795100 |
| H  | -4.91063700 | -0.09324100 | -1.63029600 |
| H  | -3.25087800 | 0.55000200  | -1.47204100 |
| C  | -4.21944600 | -2.38465800 | -3.07852600 |
| H  | -4.20900300 | -1.99205800 | -4.10358100 |
| H  | -3.87883700 | -3.42739700 | -3.10253800 |
| H  | -5.26233900 | -2.38451200 | -2.73367700 |
| C  | 3.32436700  | -1.72498200 | -2.86357400 |
| H  | 3.86272300  | -2.56327300 | -2.40348200 |
| H  | 3.15396400  | -1.97701500 | -3.91659300 |
| H  | 3.96243100  | -0.84081600 | -2.79918300 |
| C  | 1.98575400  | -1.51931900 | -2.17328500 |
| C  | 0.95931400  | -2.40905100 | -2.55266100 |
| H  | 1.19854400  | -3.07592700 | -3.37751900 |
| C  | -0.24054700 | -2.68281100 | -1.87776800 |
| C  | -1.00636100 | -3.91932800 | -2.30641800 |
| H  | -0.31683700 | -4.67129600 | -2.70336000 |
| H  | -1.57373100 | -4.34975100 | -1.47533000 |
| H  | -1.71950500 | -3.66258400 | -3.10012500 |
| C  | 0.92125000  | 1.51107200  | 2.19648100  |
| C  | -1.82329300 | 3.64234600  | -0.93020700 |
| C  | -2.22673900 | 4.88425300  | -0.10380600 |
| H  | -3.19848000 | 4.77085200  | 0.38782600  |
| H  | -1.47190300 | 5.11274300  | 0.65918600  |
| H  | -2.30015900 | 5.74608600  | -0.78441300 |
| C  | -0.53745200 | 4.00042400  | -1.71007800 |
| H  | -0.14183500 | 3.13446900  | -2.24909700 |
| H  | -0.79712100 | 4.77785200  | -2.44525300 |
| H  | 0.24011000  | 4.40066700  | -1.05115500 |
| C  | -2.93149500 | 1.97270600  | 1.49914200  |
| C  | -2.93179800 | 0.47864700  | 1.90588000  |
| H  | -1.93785100 | 0.08543400  | 2.13777300  |
| H  | -3.58128500 | 0.33207300  | 2.78191600  |
| H  | -3.32927500 | -0.13285300 | 1.08769000  |
| C  | -4.32716900 | 2.25092200  | 0.89774700  |
| H  | -4.47044300 | 3.29865200  | 0.61522300  |
| H  | -4.53316500 | 1.61713000  | 0.02955600  |
| H  | -5.07695600 | 2.01056800  | 1.66768100  |
| Cl | -0.55707000 | 0.64815100  | -2.71977200 |
| N  | 1.85355900  | -0.60906900 | -1.18994500 |
| N  | -0.69288000 | -1.91673700 | -0.86280700 |
| O  | 0.44050000  | -0.06437500 | 1.19153000  |
| P  | 0.45146000  | 2.80815000  | 1.02306700  |
| P  | -1.47497700 | 2.14073300  | 0.22916900  |
| Ti | -0.01251000 | -0.03616100 | -0.48075000 |
| C  | -2.72708000 | 2.91135800  | 2.70778100  |
| H  | -2.91123500 | 3.95449200  | 2.42763300  |
| H  | -3.44258700 | 2.64125800  | 3.50028700  |
| H  | -1.71361100 | 2.86026100  | 3.11629700  |
| C  | -2.91143600 | 3.29852700  | -1.96981500 |
| H  | -2.57660400 | 2.47939500  | -2.61388900 |
| H  | -3.86849400 | 3.02737100  | -1.51542900 |
| H  | -3.07941300 | 4.18630500  | -2.59839900 |
| C  | 2.43285000  | 1.45508200  | 2.33830600  |

|   |             |             |            |
|---|-------------|-------------|------------|
| H | 2.76514500  | 0.41785700  | 2.42652900 |
| H | 2.93446100  | 1.90282700  | 1.47764700 |
| H | 2.75033600  | 1.98803100  | 3.24633400 |
| C | 0.16822900  | 1.14154000  | 3.42974500 |
| C | 0.78392200  | 0.35415500  | 4.57018500 |
| C | 0.50389900  | 1.82564000  | 4.75482300 |
| H | -0.89001700 | 0.97764700  | 3.28033700 |
| H | 1.82246800  | 0.04454100  | 4.48138400 |
| H | 0.14290100  | -0.36294700 | 5.07815100 |
| H | -0.33836000 | 2.13089800  | 5.37254500 |
| H | 1.34739200  | 2.51238600  | 4.77310400 |

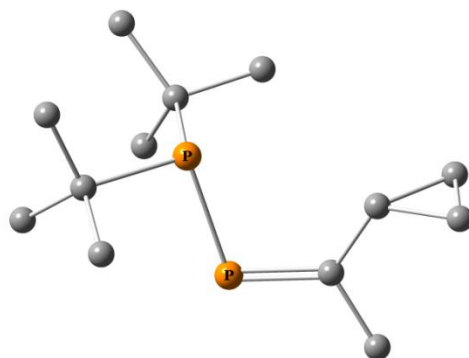

**Figure S218.** Optimized structure of **Z-3j**.

Below are presented xyz coordinates for optimized geometry of **Z-3j**:

|   |             |             |             |
|---|-------------|-------------|-------------|
| C | -2.18833400 | -0.65029300 | 0.51988600  |
| P | -0.59282000 | -0.84730200 | 1.12170900  |
| P | 0.67845800  | -0.01540900 | -0.52067400 |
| C | 1.08041300  | 1.72237800  | 0.21106000  |
| C | -0.16942500 | 2.56238700  | -0.14497400 |
| C | 1.29813600  | 1.79698300  | 1.73539300  |
| C | 2.30374200  | 2.31324900  | -0.51836400 |
| H | -0.34472300 | 2.57979300  | -1.22851800 |
| H | -1.06811100 | 2.16342900  | 0.34324700  |
| H | -0.02581400 | 3.59765700  | 0.20017900  |
| H | 2.16931700  | 1.21992600  | 2.06000100  |
| H | 1.46012200  | 2.84701100  | 2.02595000  |
| H | 0.42124600  | 1.42691600  | 2.28189200  |
| H | 2.39446900  | 3.38167100  | -0.26921000 |
| H | 3.23451100  | 1.82220100  | -0.20954200 |
| H | 2.20742900  | 2.22538800  | -1.60871400 |
| C | 2.19541300  | -1.18082900 | -0.35385200 |
| C | 3.15579400  | -0.88179400 | -1.52841300 |
| C | 2.96172400  | -1.12349600 | 0.98016100  |
| C | 1.63103100  | -2.60730300 | -0.55737400 |
| H | 2.62919400  | -0.93093200 | -2.49006100 |
| H | 3.62171500  | 0.10576600  | -1.44336700 |
| H | 3.96125900  | -1.63221100 | -1.53894000 |
| H | 2.29430700  | -1.28211700 | 1.83662100  |
| H | 3.72933400  | -1.91308000 | 0.99669700  |
| H | 3.47536300  | -0.16326200 | 1.11000600  |
| H | 2.46639100  | -3.31940800 | -0.63616300 |
| H | 0.99739100  | -2.91720900 | 0.28385200  |
| H | 1.03564300  | -2.67431200 | -1.47799800 |
| C | -3.30009100 | -1.13836600 | 1.42977700  |
| H | -2.90565200 | -1.46595000 | 2.39779600  |
| H | -4.04706100 | -0.35118300 | 1.61167700  |
| H | -3.82602100 | -1.98716100 | 0.96850400  |
| C | -2.57535500 | -0.05821100 | -0.77732500 |
| C | -3.91952200 | -0.35286800 | -1.44318600 |
| C | -3.67749600 | 1.00857100  | -0.86119700 |

|   |             |             |             |
|---|-------------|-------------|-------------|
| H | -1.74175400 | 0.10726300  | -1.45847500 |
| H | -4.61476000 | -1.01025300 | -0.92639600 |
| H | -3.90528600 | -0.46875700 | -2.52484100 |
| H | -3.48584300 | 1.84552500  | -1.52918200 |
| H | -4.19339300 | 1.27151700  | 0.05988900  |

### E.3.15. Reaction 1 with cyclopropyl methyl ketone leading to *E-3j*

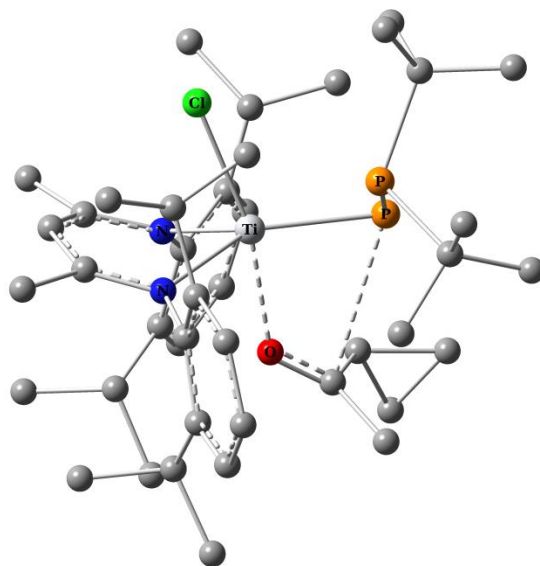

**Figure S219.** Optimized structure of *E-3j*<sub>TS1</sub>.

Below are presented xyz coordinates for optimized geometry of *E-3j*<sub>TS1</sub>:

|   |             |             |             |
|---|-------------|-------------|-------------|
| C | -3.04797800 | -0.13778000 | -0.72382600 |
| C | -3.51771100 | -1.47484200 | -0.80096000 |
| C | -4.76610900 | -1.76946300 | -0.22058900 |
| H | -5.14790600 | -2.78731700 | -0.27518900 |
| C | -5.52840200 | -0.78296600 | 0.41270300  |
| H | -6.49553300 | -1.03367000 | 0.84604300  |
| C | -5.04190600 | 0.52745000  | 0.48974400  |
| H | -5.63650200 | 1.29047800  | 0.99077400  |
| C | -3.79563500 | 0.87337200  | -0.05778900 |
| C | -2.74774900 | -2.56603300 | -1.53852900 |
| H | -1.70858300 | -2.22913200 | -1.65249600 |
| C | -2.72381000 | -3.89981500 | -0.76775000 |
| H | -2.07554300 | -4.61238100 | -1.29287200 |
| H | -2.32507800 | -3.76315800 | 0.24412100  |
| H | -3.72472100 | -4.34867000 | -0.69973300 |
| C | -3.32980500 | -2.78958300 | -2.95326900 |
| H | -2.74042800 | -3.54804300 | -3.48489600 |
| H | -4.37016000 | -3.13953400 | -2.89224500 |
| H | -3.31533300 | -1.86943300 | -3.54591700 |
| C | -3.27958300 | 2.30762200  | 0.05962100  |
| H | -2.20987300 | 2.28997500  | -0.18046100 |
| C | -3.43512100 | 2.87727900  | 1.48525900  |
| H | -3.00712900 | 3.88672800  | 1.52980200  |
| H | -4.49020100 | 2.95525000  | 1.77969500  |
| H | -2.91691300 | 2.26008200  | 2.22720900  |
| C | -3.98853000 | 3.24774300  | -0.94253800 |
| H | -3.85385400 | 2.91274900  | -1.97557900 |
| H | -5.06727400 | 3.28864800  | -0.73647900 |
| H | -3.58356700 | 4.26534100  | -0.85805100 |
| C | 1.92567100  | 2.19244500  | -0.18511400 |
| C | 1.70611800  | 3.02946900  | 0.94345800  |
| C | 2.82543600  | 3.47908200  | 1.66571300  |
| H | 2.67858400  | 4.10794000  | 2.54098600  |

|    |             |             |             |
|----|-------------|-------------|-------------|
| C  | 4.12816600  | 3.14940100  | 1.27513000  |
| H  | 4.97948100  | 3.49699000  | 1.85825800  |
| C  | 4.32664300  | 2.40095500  | 0.11339400  |
| H  | 5.34058500  | 2.18315200  | -0.22014200 |
| C  | 3.24278800  | 1.92598600  | -0.64709800 |
| C  | 0.30437900  | 3.51552200  | 1.30793600  |
| H  | -0.37378700 | 2.66270500  | 1.19490900  |
| C  | 0.18968100  | 4.05048800  | 2.74928600  |
| H  | -0.86762300 | 4.19444000  | 3.00524100  |
| H  | 0.62883400  | 3.36704100  | 3.48700700  |
| H  | 0.69022000  | 5.02294900  | 2.85773400  |
| C  | -0.16615600 | 4.62400000  | 0.33461700  |
| H  | -1.13079800 | 5.03166100  | 0.66637600  |
| H  | 0.56050000  | 5.44726300  | 0.30386700  |
| H  | -0.29988600 | 4.23978200  | -0.68048800 |
| C  | 3.53344300  | 1.20688200  | -1.96190000 |
| H  | 2.58054000  | 0.96597600  | -2.44623600 |
| C  | 4.26377700  | -0.12593900 | -1.73435800 |
| H  | 4.43878900  | -0.63359100 | -2.69141900 |
| H  | 5.23585000  | 0.03185700  | -1.24551800 |
| H  | 3.64906300  | -0.77830500 | -1.10690600 |
| C  | 4.37098400  | 2.09924900  | -2.90956000 |
| H  | 4.44721000  | 1.62470700  | -3.89704600 |
| H  | 3.93553600  | 3.09729100  | -3.03579100 |
| H  | 5.39095100  | 2.22891200  | -2.52264500 |
| C  | -2.95656000 | 0.88804200  | -3.39905000 |
| H  | -3.08259800 | 1.82948400  | -3.94402100 |
| H  | -2.74163900 | 0.10021100  | -4.13503200 |
| H  | -3.89232000 | 0.63195800  | -2.89383000 |
| C  | -1.78657200 | 0.96197300  | -2.43612700 |
| C  | -0.72309500 | 1.79539800  | -2.78645200 |
| H  | -0.82855300 | 2.31373500  | -3.73733800 |
| C  | 0.40603200  | 2.18840800  | -2.02199000 |
| C  | 1.16125100  | 3.36649300  | -2.62270400 |
| H  | 0.45139800  | 4.12411900  | -2.97414600 |
| H  | 1.85488800  | 3.82620100  | -1.91527100 |
| H  | 1.73103800  | 3.01961400  | -3.49468500 |
| C  | -1.26770200 | 0.15887900  | 2.40920500  |
| C  | 2.40605100  | -3.69103600 | -0.41671200 |
| C  | 2.79117300  | -4.74482400 | 0.64159500  |
| H  | 3.70811600  | -4.49222400 | 1.18473100  |
| H  | 1.97844400  | -4.88795100 | 1.36460600  |
| H  | 2.96459200  | -5.70454400 | 0.13005900  |
| C  | 1.18609700  | -4.24548100 | -1.18291100 |
| H  | 0.80064800  | -3.52845700 | -1.91273000 |
| H  | 1.50068100  | -5.15778000 | -1.71396900 |
| H  | 0.37721800  | -4.50656600 | -0.49086700 |
| C  | 3.00262800  | -1.68046300 | 1.95492400  |
| C  | 2.70437100  | -0.20774400 | 2.29658000  |
| H  | 1.62541900  | -0.05364700 | 2.40512400  |
| H  | 3.19232300  | 0.06257500  | 3.24616700  |
| H  | 3.07164100  | 0.46624100  | 1.51747200  |
| C  | 4.50686800  | -1.81259200 | 1.64146600  |
| H  | 4.80147800  | -2.84151800 | 1.40712400  |
| H  | 4.79885800  | -1.16820800 | 0.80506300  |
| H  | 5.08298500  | -1.49616700 | 2.52492400  |
| Cl | 0.64969200  | -1.10180900 | -2.56733700 |
| N  | -1.78346400 | 0.22791200  | -1.29797700 |
| N  | 0.79523900  | 1.61299200  | -0.87260000 |
| O  | -0.93363900 | 0.62253400  | 1.28438600  |
| P  | -0.11358100 | -2.20658300 | 1.03833000  |
| P  | 1.90289700  | -2.00888700 | 0.40257900  |
| Ti | -0.01449900 | -0.37781300 | -0.43611300 |
| C  | 2.61751700  | -2.55376000 | 3.16470800  |
| H  | 2.89431500  | -3.60364600 | 3.02946600  |
| H  | 3.13762300  | -2.17939100 | 4.06123200  |
| H  | 1.53489400  | -2.50400000 | 3.34000000  |
| C  | 3.56422200  | -3.47434600 | -1.41153400 |

|   |             |             |             |
|---|-------------|-------------|-------------|
| H | 3.25311400  | -2.80791100 | -2.22321900 |
| H | 4.45393000  | -3.04977600 | -0.93094500 |
| H | 3.84862900  | -4.44377400 | -1.84970500 |
| C | -0.45795300 | 0.45070400  | 3.64523700  |
| H | 0.31493700  | -0.32868800 | 3.73292600  |
| H | 0.04752600  | 1.41297800  | 3.55332100  |
| H | -1.07196800 | 0.43380800  | 4.55110800  |
| C | -2.37104800 | -0.80861600 | 2.46543100  |
| C | -2.42689800 | -1.88973400 | 3.55454100  |
| C | -3.37205400 | -0.74164000 | 3.63120500  |
| H | -2.78745700 | -1.05584300 | 1.49485900  |
| H | -1.59802500 | -1.93046200 | 4.25722100  |
| H | -2.79915700 | -2.85754100 | 3.22641100  |
| H | -4.41025200 | -0.88573700 | 3.34433900  |
| H | -3.20453000 | 0.04119400  | 4.36628300  |

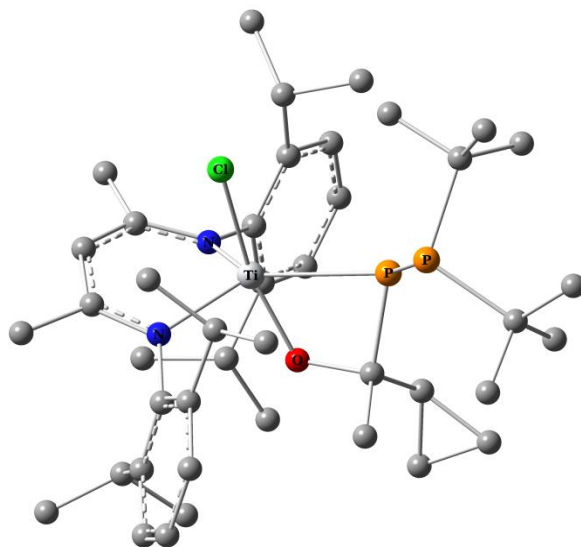

**Figure S220.** Optimized structure of *E*-3jr.

Below are presented xyz coordinates for optimized geometry of *E*-3jr:

|   |             |             |             |
|---|-------------|-------------|-------------|
| C | -2.16128000 | -2.47004300 | 0.12108400  |
| C | -1.59613100 | -3.71313500 | -0.25277600 |
| C | -1.81009400 | -4.81898300 | 0.59068200  |
| H | -1.37892700 | -5.78126200 | 0.31831700  |
| C | -2.55756400 | -4.70421800 | 1.76303700  |
| H | -2.71489900 | -5.57253100 | 2.40098200  |
| C | -3.09519700 | -3.46279300 | 2.12243400  |
| H | -3.66439600 | -3.37789700 | 3.04488600  |
| C | -2.90617400 | -2.32444400 | 1.32176300  |
| C | -0.74565700 | -3.89788300 | -1.50306900 |
| H | -0.73545900 | -2.95400200 | -2.06076500 |
| C | 0.71021600  | -4.22365400 | -1.10316000 |
| H | 1.34550000  | -4.28375000 | -1.99548800 |
| H | 1.11329900  | -3.45194300 | -0.43671700 |
| H | 0.76088800  | -5.18852500 | -0.57937400 |
| C | -1.29631100 | -5.00400800 | -2.43092700 |
| H | -0.70950500 | -5.03841100 | -3.35810400 |
| H | -1.22802100 | -5.99134400 | -1.95433900 |
| H | -2.34813900 | -4.83584700 | -2.69455600 |
| C | -3.48918100 | -0.97497800 | 1.73346900  |
| H | -2.75459000 | -0.21389900 | 1.43986200  |
| C | -3.70458100 | -0.87200700 | 3.25540800  |
| H | -3.95151600 | 0.15974100  | 3.52950300  |
| H | -4.53673000 | -1.50697700 | 3.59034100  |
| H | -2.80292700 | -1.16424600 | 3.80455200  |
| C | -4.82166700 | -0.67465000 | 1.00684900  |



|    |             |             |             |
|----|-------------|-------------|-------------|
| H  | -4.68944400 | -0.59604200 | -0.07745400 |
| H  | -5.55925700 | -1.46302300 | 1.21079400  |
| H  | -5.23564200 | 0.27940200  | 1.36103100  |
| C  | -1.05452600 | 2.86639900  | -0.72968100 |
| C  | -1.97079000 | 3.52668700  | 0.12452700  |
| C  | -1.64507700 | 4.81792500  | 0.57663300  |
| H  | -2.33818500 | 5.33985900  | 1.23519400  |
| C  | -0.44395600 | 5.43043600  | 0.21404500  |
| H  | -0.20946400 | 6.43185100  | 0.57128500  |
| C  | 0.47139400  | 4.74013400  | -0.58916700 |
| H  | 1.41909300  | 5.20918300  | -0.84113900 |
| C  | 0.19619200  | 3.44761000  | -1.06432900 |
| C  | -3.23854900 | 2.85869900  | 0.64536600  |
| H  | -3.35676300 | 1.89259600  | 0.14040800  |
| C  | -3.08256100 | 2.57803000  | 2.15701400  |
| H  | -3.99617800 | 2.11623600  | 2.55268400  |
| H  | -2.23805200 | 1.90424800  | 2.33648100  |
| H  | -2.91172900 | 3.51269300  | 2.70819600  |
| C  | -4.50801700 | 3.70034800  | 0.39087800  |
| H  | -5.39857500 | 3.13965800  | 0.70412000  |
| H  | -4.48468900 | 4.63666600  | 0.96435100  |
| H  | -4.62279900 | 3.96267000  | -0.66818200 |
| C  | 1.21464700  | 2.69592700  | -1.91638000 |
| H  | 1.24463700  | 1.64616400  | -1.56436300 |
| C  | 2.64874500  | 3.23300000  | -1.77322200 |
| H  | 3.34212600  | 2.54696000  | -2.27036600 |
| H  | 2.75048300  | 4.22454900  | -2.23730100 |
| H  | 2.95381500  | 3.30172200  | -0.72226900 |
| C  | 0.80662900  | 2.67268200  | -3.40451700 |
| H  | 1.55733800  | 2.12828700  | -3.98975200 |
| H  | -0.15293400 | 2.16810300  | -3.55192600 |
| H  | 0.73431100  | 3.69970100  | -3.78905900 |
| C  | -3.80425000 | -2.17598400 | -2.15489700 |
| H  | -3.25592400 | -2.92926800 | -2.73510000 |
| H  | -4.23026100 | -2.68343600 | -1.28273300 |
| H  | -4.61086600 | -1.77634200 | -2.77634600 |
| C  | -2.85143700 | -1.07586000 | -1.73551200 |
| C  | -2.92854300 | 0.14511900  | -2.44155700 |
| H  | -3.63414600 | 0.15241800  | -3.26822300 |
| C  | -2.34018300 | 1.39613600  | -2.14886200 |
| C  | -2.87751300 | 2.60612400  | -2.88710000 |
| H  | -3.70792500 | 3.05495300  | -2.32755600 |
| H  | -2.10539800 | 3.37261700  | -3.00564900 |
| H  | -3.25632900 | 2.30705500  | -3.87003300 |
| C  | 0.76671200  | 0.36259400  | 1.83943200  |
| C  | 4.39751200  | -1.55915000 | -0.93595400 |
| C  | 4.51562800  | -2.74423300 | 0.03970800  |
| H  | 5.27788700  | -2.57452500 | 0.80940100  |
| H  | 3.55616500  | -2.93550400 | 0.53735400  |
| H  | 4.80144200  | -3.65028200 | -0.51776000 |
| C  | 3.39508200  | -1.92139300 | -2.04903200 |
| H  | 3.29329900  | -1.10876800 | -2.77790900 |
| H  | 3.75224300  | -2.81968700 | -2.57641000 |
| H  | 2.40054800  | -2.13504300 | -1.65088600 |
| C  | 4.77630100  | 0.44142900  | 1.42444300  |
| C  | 4.66729600  | 1.97099300  | 1.63827100  |
| H  | 3.63293800  | 2.31449900  | 1.70736200  |
| H  | 5.18487200  | 2.25206100  | 2.56888800  |
| H  | 5.14090500  | 2.50794300  | 0.80612100  |
| C  | 6.27588900  | 0.14964200  | 1.20254000  |
| H  | 6.49115300  | -0.92232200 | 1.14339700  |
| H  | 6.66033300  | 0.64132400  | 0.30026400  |
| H  | 6.83279100  | 0.55130500  | 2.06356600  |
| Cl | 0.41391100  | -0.65886500 | -2.78631500 |
| N  | -1.99148300 | -1.29875900 | -0.71374500 |
| N  | -1.37279400 | 1.55171400  | -1.22207700 |
| O  | -0.48388800 | 0.36258400  | 1.10692300  |
| P  | 1.73871100  | -0.72290400 | 0.55229500  |

|    |             |             |             |
|----|-------------|-------------|-------------|
| P  | 3.73188700  | 0.08780400  | -0.17072200 |
| Ti | -0.35794300 | -0.11184400 | -0.68142600 |
| C  | 4.30255900  | -0.32320100 | 2.67122900  |
| H  | 4.39655000  | -1.40645500 | 2.53524600  |
| H  | 4.91234800  | -0.03081600 | 3.54162500  |
| H  | 3.25548300  | -0.11354500 | 2.90296100  |
| C  | 5.74995600  | -1.28622600 | -1.63823700 |
| H  | 5.69607700  | -0.38275700 | -2.26047700 |
| H  | 6.58530600  | -1.17909900 | -0.94200500 |
| H  | 5.97627700  | -2.13755700 | -2.29847900 |
| C  | 1.15978400  | 1.82454900  | 2.03255500  |
| H  | 0.30544800  | 2.37841500  | 2.44425900  |
| H  | 2.00829200  | 1.92837700  | 2.71550400  |
| H  | 1.41830600  | 2.28014000  | 1.07186400  |
| C  | 0.52165800  | -0.40926300 | 3.13078300  |
| C  | 1.23684000  | -0.11992900 | 4.43614900  |
| C  | -0.23008700 | 0.21392000  | 4.29372800  |
| H  | 0.29765700  | -1.45930600 | 2.94357100  |
| H  | 1.93275100  | 0.71509700  | 4.47890200  |
| H  | 1.52711500  | -0.97203800 | 5.04752100  |
| H  | -0.95852200 | -0.40307800 | 4.81427900  |
| H  | -0.50142500 | 1.26535000  | 4.22423100  |

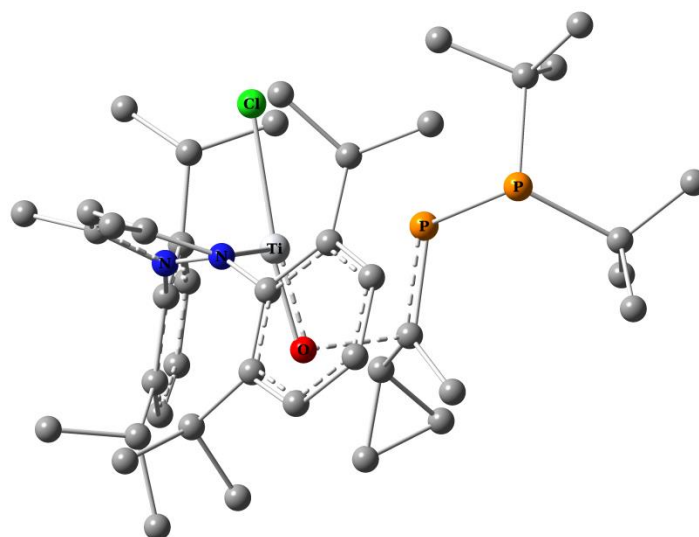

**Figure S221.** Optimized structure of *E*-**3j**Ts<sub>2</sub>.

Below are presented xyz coordinates for optimized geometry of *E*-**3j**Ts<sub>2</sub>.

|   |             |             |             |
|---|-------------|-------------|-------------|
| C | -2.79125400 | -1.72688900 | -0.28913500 |
| C | -2.47579000 | -2.98972700 | -0.85303500 |
| C | -2.87943800 | -4.14566700 | -0.15701200 |
| H | -2.63232300 | -5.12268800 | -0.56991400 |
| C | -3.59890700 | -4.06009600 | 1.03527800  |
| H | -3.90854100 | -4.96552700 | 1.55538100  |
| C | -3.93146300 | -2.80314800 | 1.55769600  |
| H | -4.50087800 | -2.74776100 | 2.48250600  |
| C | -3.52942400 | -1.61769500 | 0.92299500  |
| C | -1.75673600 | -3.14664900 | -2.18785900 |
| H | -1.57937200 | -2.14870600 | -2.60276700 |
| C | -0.37631300 | -3.81431600 | -2.01345300 |
| H | 0.13477700  | -3.87337700 | -2.98296300 |
| H | 0.25933400  | -3.23665400 | -1.33219000 |
| H | -0.47846800 | -4.83333800 | -1.61299500 |
| C | -2.61516300 | -3.94938200 | -3.19240200 |
| H | -2.13084000 | -3.94931900 | -4.17773100 |
| H | -2.72803600 | -4.99489700 | -2.87416600 |
| H | -3.62090400 | -3.52387200 | -3.30007700 |

|   |             |             |             |
|---|-------------|-------------|-------------|
| C | -3.87680000 | -0.25145600 | 1.50832700  |
| H | -2.98230300 | 0.37192700  | 1.37690000  |
| C | -4.21173000 | -0.30635100 | 3.01023000  |
| H | -4.36350900 | 0.71021000  | 3.39097900  |
| H | -5.14113000 | -0.86199800 | 3.19831900  |
| H | -3.40565400 | -0.76865500 | 3.59034400  |
| C | -5.05404800 | 0.41747300  | 0.75933400  |
| H | -4.81973900 | 0.60566000  | -0.29254200 |
| H | -5.95275000 | -0.21262500 | 0.80907800  |
| H | -5.28810400 | 1.38475400  | 1.22503200  |
| C | -0.18107800 | 3.04802400  | -0.15961600 |
| C | -0.84453500 | 3.70655100  | 0.90446700  |
| C | -0.16588500 | 4.73901800  | 1.57479800  |
| H | -0.66242200 | 5.25697000  | 2.39450800  |
| C | 1.13413700  | 5.09937800  | 1.21562600  |
| H | 1.64613800  | 5.90236300  | 1.74365700  |
| C | 1.78710300  | 4.41111100  | 0.18655900  |
| H | 2.80709200  | 4.68500500  | -0.06902300 |
| C | 1.15641900  | 3.37076800  | -0.51766000 |
| C | -2.23244200 | 3.29833800  | 1.38405100  |
| H | -2.60727800 | 2.51082200  | 0.71916800  |
| C | -2.13722400 | 2.70770300  | 2.80890800  |
| H | -3.13710000 | 2.45069400  | 3.18029100  |
| H | -1.51818800 | 1.80431300  | 2.80210800  |
| H | -1.69829400 | 3.43740400  | 3.50280400  |
| C | -3.23428500 | 4.47375700  | 1.36047000  |
| H | -4.23647600 | 4.11837300  | 1.63481200  |
| H | -2.94754400 | 5.25330900  | 2.07914000  |
| H | -3.29543300 | 4.94077000  | 0.36977900  |
| C | 1.89295400  | 2.62975900  | -1.63459300 |
| H | 1.72569600  | 1.54970700  | -1.48178400 |
| C | 3.41414700  | 2.86014400  | -1.61123200 |
| H | 3.88669100  | 2.20161900  | -2.35004200 |
| H | 3.66585700  | 3.89489200  | -1.88524100 |
| H | 3.84567500  | 2.62685600  | -0.63169700 |
| C | 1.34705900  | 2.97197900  | -3.03860900 |
| H | 1.95800700  | 2.47099900  | -3.80003500 |
| H | 0.32026700  | 2.62195900  | -3.17130100 |
| H | 1.39133800  | 4.05624100  | -3.21399700 |
| C | -4.16161000 | -0.62595500 | -2.56211100 |
| H | -3.76920700 | -1.23008500 | -3.39153000 |
| H | -4.66619600 | -1.30283300 | -1.86506100 |
| H | -4.88572300 | 0.08629700  | -2.97014300 |
| C | -3.00849000 | 0.09537000  | -1.89708700 |
| C | -2.71506600 | 1.40185000  | -2.33984800 |
| H | -3.34582500 | 1.77620800  | -3.14195900 |
| C | -1.80954600 | 2.33532500  | -1.79257400 |
| C | -1.96696200 | 3.78238300  | -2.21836000 |
| H | -2.66635300 | 4.29583000  | -1.54594800 |
| H | -1.01523800 | 4.31989600  | -2.18068800 |
| H | -2.37734000 | 3.83123800  | -3.23244100 |
| C | 0.80787600  | -1.04781700 | 1.81844400  |
| C | 4.30719400  | -1.31188900 | -1.33851800 |
| C | 4.47922100  | -2.83186300 | -1.14109000 |
| H | 5.25197600  | -3.08308900 | -0.40667900 |
| H | 3.53601100  | -3.29367600 | -0.82257700 |
| H | 4.77318800  | -3.28627000 | -2.10025200 |
| C | 3.27709200  | -1.09653300 | -2.46327700 |
| H | 3.05581300  | -0.03541800 | -2.62417000 |
| H | 3.68198900  | -1.50546000 | -3.40181300 |
| H | 2.32748100  | -1.60135600 | -2.26200500 |
| C | 4.70729100  | -0.93058300 | 1.72941200  |
| C | 4.69095700  | 0.24267400  | 2.74167000  |
| H | 3.69050800  | 0.51066900  | 3.08259200  |
| H | 5.28698100  | -0.03333200 | 3.62560200  |
| H | 5.14015100  | 1.13847300  | 2.29395300  |
| C | 6.19572000  | -1.09849700 | 1.34662500  |
| H | 6.37682600  | -1.95105500 | 0.68598100  |

|    |             |             |             |
|----|-------------|-------------|-------------|
| H  | 6.59680500  | -0.19214500 | 0.87649500  |
| H  | 6.76659900  | -1.27073000 | 2.27227700  |
| Cl | 0.14548800  | -0.29432900 | -2.78239800 |
| N  | -2.32290900 | -0.51042500 | -0.91055700 |
| N  | -0.87388000 | 2.00778100  | -0.88132800 |
| O  | -0.65138900 | 0.18744500  | 1.23173000  |
| P  | 1.68788500  | -1.48726300 | 0.29577700  |
| P  | 3.64408700  | -0.33478200 | 0.20150500  |
| Ti | -0.42031600 | 0.07061700  | -0.47282300 |
| C  | 4.21686100  | -2.23551400 | 2.38221800  |
| H  | 4.26999700  | -3.07621800 | 1.68151000  |
| H  | 4.84844700  | -2.47104800 | 3.25372900  |
| H  | 3.17906500  | -2.16607000 | 2.72454100  |
| C  | 5.62980900  | -0.66265400 | -1.81368300 |
| H  | 5.52095500  | 0.42510600  | -1.91028600 |
| H  | 6.47625000  | -0.86695200 | -1.15380700 |
| H  | 5.87833000  | -1.06766300 | -2.80653900 |
| C  | 1.28338100  | -0.06662400 | 2.85738800  |
| H  | 0.44468000  | 0.28380400  | 3.46680400  |
| H  | 2.01987000  | -0.54852700 | 3.51413200  |
| H  | 1.75109700  | 0.79636800  | 2.37568000  |
| C  | -0.09620100 | -2.15051100 | 2.24967400  |
| C  | 0.29708100  | -2.96426300 | 3.49072700  |
| C  | -0.94099600 | -2.10496200 | 3.50042300  |
| H  | -0.49010100 | -2.75025800 | 1.42913000  |
| H  | 1.15635700  | -2.62690700 | 4.06608000  |
| H  | 0.19879200  | -4.04456300 | 3.41221800  |
| H  | -1.90855800 | -2.59481200 | 3.43881100  |
| H  | -0.92398700 | -1.19660000 | 4.09805100  |

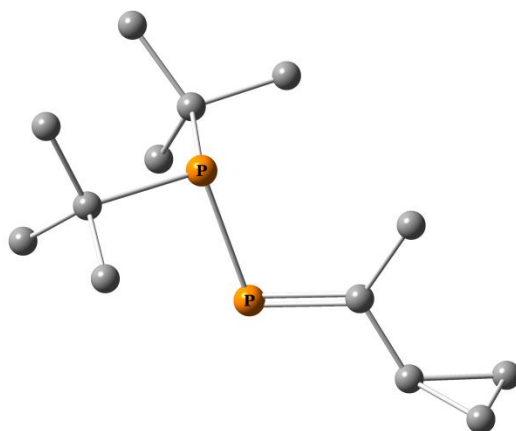

**Figure S222.** Optimized structure of *E-3j*.

Below are presented xyz coordinates for optimized geometry of *E-3j*:

|   |             |             |             |
|---|-------------|-------------|-------------|
| C | -2.17675600 | -0.12616400 | -0.12142900 |
| P | -0.77556600 | -0.47936400 | 0.80789500  |
| P | 0.89936800  | -0.03470000 | -0.60208000 |
| C | 1.47775000  | 1.67091700  | 0.08713000  |
| C | 0.48087400  | 2.67171500  | -0.54478300 |
| C | 1.43857700  | 1.84998400  | 1.61794000  |
| C | 2.89475800  | 1.97923400  | -0.43702900 |
| H | 0.48941300  | 2.60992000  | -1.64058800 |
| H | -0.54239800 | 2.48277400  | -0.19340000 |
| H | 0.75415200  | 3.69684100  | -0.25187700 |
| H | 2.12766300  | 1.17495200  | 2.13449800  |
| H | 1.72669700  | 2.88332600  | 1.86775800  |
| H | 0.42988900  | 1.67566600  | 2.01391000  |
| H | 3.13333200  | 3.03592000  | -0.24131600 |
| H | 3.65361200  | 1.37056200  | 0.06938400  |
| H | 2.97373000  | 1.80741300  | -1.51872800 |

|   |             |             |             |
|---|-------------|-------------|-------------|
| C | 2.12217400  | -1.41782900 | -0.07243000 |
| C | 3.31408500  | -1.39880300 | -1.05763600 |
| C | 2.63686600  | -1.36125900 | 1.37715600  |
| C | 1.35203100  | -2.74225100 | -0.28966000 |
| H | 2.96683100  | -1.45317900 | -2.09732200 |
| H | 3.92902400  | -0.49905300 | -0.94904800 |
| H | 3.95869200  | -2.27014300 | -0.86459400 |
| H | 1.81066100  | -1.32150000 | 2.09819800  |
| H | 3.23187100  | -2.26300700 | 1.59109000  |
| H | 3.28602200  | -0.49275000 | 1.54076700  |
| H | 2.04400000  | -3.58854800 | -0.16284400 |
| H | 0.53391700  | -2.85953400 | 0.43289400  |
| H | 0.92638700  | -2.79619400 | -1.30085300 |
| C | -2.23610600 | 0.39429300  | -1.53665400 |
| H | -3.00563600 | -0.12791400 | -2.12283900 |
| H | -2.49959900 | 1.46294100  | -1.53597100 |
| H | -1.26937100 | 0.28804500  | -2.03920400 |
| C | -3.46793800 | -0.33708600 | 0.58503000  |
| C | -4.71147300 | 0.49675300  | 0.27056400  |
| C | -4.68267200 | -0.95409800 | -0.11705000 |
| H | -3.36101000 | -0.62740500 | 1.63012400  |
| H | -4.63210900 | 1.23501600  | -0.52423200 |
| H | -5.32355000 | 0.80321000  | 1.11612800  |
| H | -5.26385900 | -1.66550900 | 0.46544500  |
| H | -4.58840400 | -1.20332200 | -1.17151700 |

### E.3.16. Reaction of acetone with $t\text{Bu}_2\text{P-P}(\text{SiMe}_3)\text{Li}(\text{THF})_3$

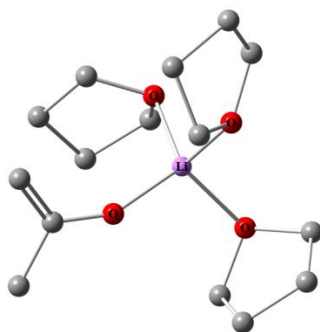

**Figure S223.** Optimized structure of  $\text{CH}_2=\text{C}(\text{OLiTHF}_3)\text{CH}_3$ .

Below are presented xyz coordinates for optimized geometry of  $\text{CH}_2=\text{C}(\text{OLiTHF}_3)\text{CH}_3$ :

|    |             |             |             |
|----|-------------|-------------|-------------|
| Li | -0.12488800 | 0.17092700  | -0.38264700 |
| O  | -0.43231600 | 2.05614100  | -0.99368500 |
| O  | 0.86901900  | -0.81452500 | -1.80412100 |
| O  | -1.90132000 | -0.68231200 | -0.20190500 |
| C  | -1.81032800 | 2.48112800  | -1.14082900 |
| H  | -2.36056600 | 1.64070600  | -1.57230200 |
| H  | -1.84054600 | 3.33870600  | -1.83178000 |
| C  | -2.27003800 | 2.87652600  | 0.27860400  |
| H  | -2.93127500 | 3.75070500  | 0.25238100  |
| H  | -2.81419400 | 2.04980000  | 0.74735300  |
| C  | -0.93820500 | 3.15970700  | 1.03884300  |
| H  | -0.77656800 | 2.41587300  | 1.82572800  |
| H  | -0.91514500 | 4.16045200  | 1.48580900  |
| C  | 0.14801900  | 2.98698500  | -0.03521400 |
| H  | 0.37415700  | 3.92923000  | -0.55972900 |
| H  | 1.05654100  | 2.51380600  | 0.34472700  |
| C  | 1.68120400  | -1.82741000 | -1.12527100 |
| H  | 1.69646300  | -2.73013400 | -1.75303600 |
| H  | 1.19209600  | -2.03687300 | -0.16970500 |
| C  | 3.08967100  | -1.21479300 | -0.94005100 |
| H  | 3.34501500  | -1.16020600 | 0.12270600  |
| H  | 3.84550000  | -1.82231300 | -1.45302100 |

|   |             |             |             |
|---|-------------|-------------|-------------|
| C | 1.79229200  | 0.03463800  | -2.53462400 |
| H | 1.25631900  | 0.96136000  | -2.76017700 |
| H | 2.08225100  | -0.46800000 | -3.47230400 |
| C | -2.09939500 | -1.18180000 | 1.15936400  |
| H | -3.06267300 | -0.80348400 | 1.53652700  |
| H | -1.26777400 | -0.78777100 | 1.75267200  |
| C | -2.38158200 | -1.67473100 | -1.16110900 |
| H | -3.17971400 | -1.21716600 | -1.76037700 |
| H | -1.53786300 | -1.92483900 | -1.81589000 |
| C | 2.97887300  | 0.19214700  | -1.58041600 |
| H | 2.73372400  | 0.93324100  | -0.81129800 |
| H | 3.89721200  | 0.49991900  | -2.09485700 |
| C | -2.11314800 | -2.70027500 | 1.00313600  |
| H | -1.08503500 | -3.07500400 | 0.92005800  |
| H | -2.60079400 | -3.20741900 | 1.84333900  |
| C | -2.86903100 | -2.87550400 | -0.32936100 |
| H | -2.65641600 | -3.83034400 | -0.82354600 |
| H | -3.95206500 | -2.81210500 | -0.16048700 |
| O | 0.78473100  | 0.21975100  | 1.13998000  |
| C | 1.52153000  | -0.29336200 | 2.10436200  |
| C | 1.44907700  | -1.58625100 | 2.55741100  |
| H | 2.08639600  | -1.93764400 | 3.36529800  |
| H | 0.73271400  | -2.29237600 | 2.13861200  |
| C | 2.51998600  | 0.67937800  | 2.72512500  |
| H | 3.20189800  | 1.05964400  | 1.94922900  |
| H | 1.98465100  | 1.54778400  | 3.13628900  |
| H | 3.11589400  | 0.22092100  | 3.52374400  |

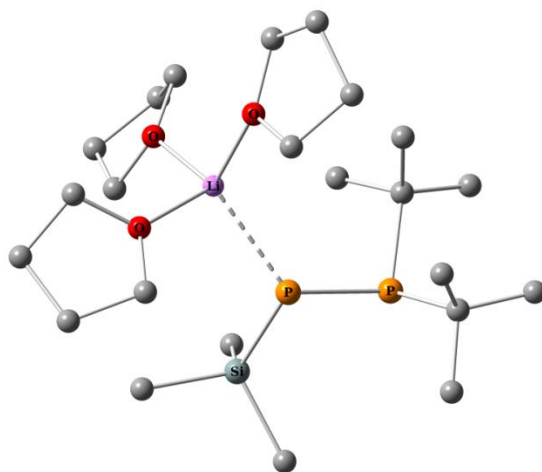

**Figure S224.** Optimized structure of *t*Bu<sub>2</sub>P-P(SiMe<sub>3</sub>)LiTHF<sub>3</sub>.

Below are presented xyz coordinates for optimized geometry of *t*Bu<sub>2</sub>P-P(SiMe<sub>3</sub>)LiTHF<sub>3</sub>:

|    |             |             |             |
|----|-------------|-------------|-------------|
| Li | 1.30893300  | 0.66414000  | 0.00905200  |
| Si | -0.29051500 | -2.94786600 | -0.24978300 |
| P  | -0.59111300 | -0.78535200 | -0.66381900 |
| P  | -2.62093800 | -0.72008600 | 0.19278700  |
| O  | 2.66853900  | 0.16736100  | -1.31761800 |
| O  | 1.14300100  | 2.58647400  | -0.35399400 |
| O  | 2.33836300  | 0.43031200  | 1.67261600  |
| C  | -0.43422500 | -3.47632900 | 1.58283100  |
| H  | -0.23209200 | -4.55268200 | 1.69844900  |
| H  | -1.45751500 | -3.28402300 | 1.93374900  |
| H  | 0.24960400  | -2.92792000 | 2.24549200  |
| C  | 1.45064600  | -3.45065900 | -0.87035200 |
| H  | 1.70081600  | -4.47329700 | -0.55070100 |
| H  | 2.23756400  | -2.77780200 | -0.50299800 |
| H  | 1.48101500  | -3.43124400 | -1.96924300 |
| C  | -1.53379400 | -4.05180600 | -1.17726600 |
| H  | -1.35367300 | -5.11926600 | -0.97607900 |

|   |             |             |             |
|---|-------------|-------------|-------------|
| H | -1.46996400 | -3.88793400 | -2.26180800 |
| H | -2.55810700 | -3.81193700 | -0.86153300 |
| C | -3.63328100 | 0.06436600  | -1.25703700 |
| C | -2.92820700 | 1.18499000  | -2.04159300 |
| H | -3.53591300 | 1.46683700  | -2.91718500 |
| H | -1.95065900 | 0.83223100  | -2.39682100 |
| H | -2.78044800 | 2.08484400  | -1.43321100 |
| C | -3.84534500 | -1.12880200 | -2.21873900 |
| H | -4.42060300 | -0.79864700 | -3.09865100 |
| H | -4.39589000 | -1.94208900 | -1.72820500 |
| H | -2.87906300 | -1.52228200 | -2.56018900 |
| C | -5.00904900 | 0.55684300  | -0.76834100 |
| H | -5.66147800 | 0.74763000  | -1.63524300 |
| H | -4.92732600 | 1.49634000  | -0.20684300 |
| H | -5.50241700 | -0.18894600 | -0.13051800 |
| C | -2.50908300 | 0.56523500  | 1.63352700  |
| C | -1.46133400 | -0.02269900 | 2.60161100  |
| H | -1.35360000 | 0.64000400  | 3.47661900  |
| H | -0.49240600 | -0.12926800 | 2.09609700  |
| H | -1.76332100 | -1.01686200 | 2.95607800  |
| C | -2.05991900 | 1.97250800  | 1.21393900  |
| H | -1.85297300 | 2.59185100  | 2.10438400  |
| H | -2.83239000 | 2.48616200  | 0.62805500  |
| H | -1.14381600 | 1.91217400  | 0.61042600  |
| C | -3.85431400 | 0.62835000  | 2.38999000  |
| H | -3.72730900 | 1.19963400  | 3.32409800  |
| H | -4.20140300 | -0.37997600 | 2.65126300  |
| H | -4.64002300 | 1.11873000  | 1.80680800  |
| C | 4.07095800  | 0.50175500  | -1.27170100 |
| H | 4.32760200  | 0.66795200  | -0.22141700 |
| H | 4.24201500  | 1.43149100  | -1.84065900 |
| C | 4.76160800  | -0.70182300 | -1.93262600 |
| H | 5.71577500  | -0.42704300 | -2.39696800 |
| H | 4.95780600  | -1.47863800 | -1.18422200 |
| C | 3.70823200  | -1.20075000 | -2.96740400 |
| H | 3.52445000  | -2.27298800 | -2.84802900 |
| H | 4.03386400  | -1.02396100 | -3.99890500 |
| C | 2.43837500  | -0.38128500 | -2.64212800 |
| H | 2.30907300  | 0.45612400  | -3.34655400 |
| H | 1.50653000  | -0.95014500 | -2.58372600 |
| C | 1.11822200  | 3.79333000  | 0.46012100  |
| H | 2.12721500  | 3.95104700  | 0.85981300  |
| H | 0.41781200  | 3.63011600  | 1.29045100  |
| C | 0.64008700  | 4.91457000  | -0.47240000 |
| H | 0.09771800  | 5.69770600  | 0.06909700  |
| H | 1.49272100  | 5.37696100  | -0.98725900 |
| C | 0.54558200  | 2.85272000  | -1.66236800 |
| H | -0.06136100 | 1.97783900  | -1.91803300 |
| H | 1.35911400  | 2.96829400  | -2.39435300 |
| C | 2.64390100  | -0.98725100 | 1.88773600  |
| H | 3.49475500  | -1.23710600 | 1.24536400  |
| H | 1.76744000  | -1.56803800 | 1.57415600  |
| C | 2.05792300  | 1.07113300  | 2.95452400  |
| H | 2.88246300  | 1.76599300  | 3.17041100  |
| H | 1.12349000  | 1.63388900  | 2.85286000  |
| C | -0.24221500 | 4.14879300  | -1.47824800 |
| H | -1.22574300 | 3.93452200  | -1.04313300 |
| H | -0.38675600 | 4.68767500  | -2.42130900 |
| C | 2.92623300  | -1.11872000 | 3.38408900  |
| H | 2.72469600  | -2.13088200 | 3.75207200  |
| H | 3.97240500  | -0.86817700 | 3.60547200  |
| C | 1.97541400  | -0.06362400 | 3.98139500  |
| H | 0.95378500  | -0.45827100 | 4.02775900  |
| H | 2.26997300  | 0.26441900  | 4.98470900  |

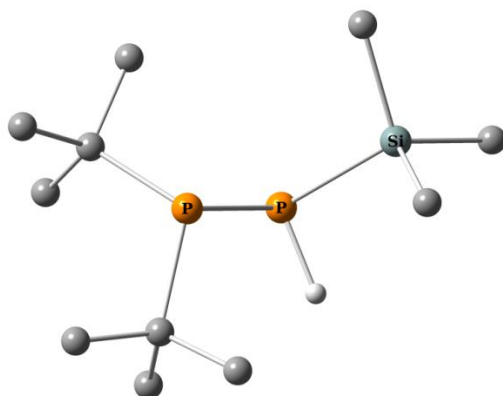

**Figure S225.** Optimized structure of *t*Bu<sub>2</sub>P-P(SiMe<sub>3</sub>)LiTHF<sub>3</sub>.

Below are presented xyz coordinates for optimized geometry of *t*Bu<sub>2</sub>P-P(SiMe<sub>3</sub>)LiTHF<sub>3</sub>:

|    |             |             |             |
|----|-------------|-------------|-------------|
| P  | -0.80996300 | 0.02474400  | 1.20938300  |
| P  | 0.69873700  | 0.00060100  | -0.47066500 |
| C  | 1.74181600  | -1.56083200 | -0.04393800 |
| C  | 1.67918100  | 1.59185000  | -0.02016100 |
| C  | -2.77030800 | 1.60528300  | -1.07436300 |
| C  | -2.65940400 | -1.47584900 | -1.30231100 |
| C  | -4.16799400 | -0.15680300 | 1.06915500  |
| C  | 0.62301700  | 2.72124500  | 0.02162700  |
| C  | 2.44083900  | 1.56762200  | 1.31549600  |
| C  | 2.64591700  | 1.90044000  | -1.18706400 |
| C  | 2.05217300  | -1.82882600 | 1.44169200  |
| C  | 0.90998000  | -2.73963600 | -0.60365600 |
| C  | 3.06681800  | -1.48486800 | -0.83427100 |
| H  | -3.70683600 | 1.64920700  | -1.64874200 |
| H  | -2.73523200 | 2.48306400  | -0.41590500 |
| H  | -1.93595800 | 1.67427700  | -1.78458400 |
| H  | -3.54987600 | -1.45962100 | -1.94778200 |
| H  | -2.64696100 | -2.43538400 | -0.76795000 |
| H  | -1.77025100 | -1.43042000 | -1.94442100 |
| H  | -4.20637300 | 0.68849300  | 1.76909600  |
| H  | -5.10803900 | -0.16794700 | 0.49863100  |
| H  | -4.12536300 | -1.08136000 | 1.66106300  |
| H  | 1.13374100  | 3.68751500  | 0.14764400  |
| H  | 0.04286000  | 2.76365500  | -0.90907100 |
| H  | -0.07122200 | 2.59641900  | 0.86294200  |
| H  | 2.84032400  | 2.57119700  | 1.52958600  |
| H  | 3.29094100  | 0.87566400  | 1.28409500  |
| H  | 1.78070700  | 1.28116700  | 2.14426800  |
| H  | 2.11350000  | 1.91548800  | -2.14688200 |
| H  | 3.09782800  | 2.89166800  | -1.03059400 |
| H  | 3.46004800  | 1.17175500  | -1.25865800 |
| H  | 2.61104200  | -2.77398300 | 1.52449000  |
| H  | 2.66292400  | -1.03806100 | 1.88638100  |
| H  | 1.13995700  | -1.93216200 | 2.04026500  |
| H  | 1.46642600  | -3.67836000 | -0.46237900 |
| H  | 0.70962600  | -2.61344700 | -1.67502800 |
| H  | -0.05247000 | -2.83989300 | -0.08593300 |
| H  | 2.89724900  | -1.22828600 | -1.88832800 |
| H  | 3.75446000  | -0.74929800 | -0.40063400 |
| H  | 3.56500000  | -2.46542600 | -0.79883000 |
| H  | -0.83746300 | -1.38154000 | 1.42766600  |
| Si | -2.68031500 | -0.01373700 | -0.09888800 |



E.3.17. Optimized structures of **4a-4e**

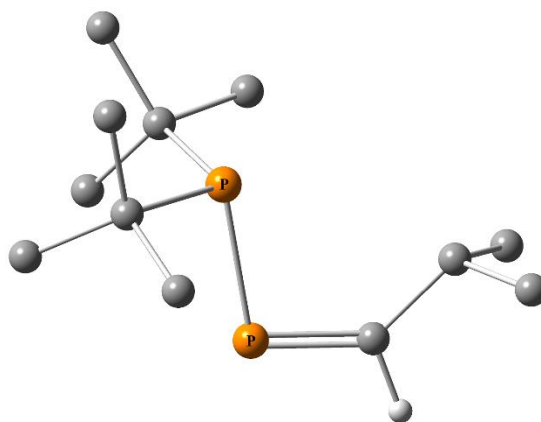

**Figure S226.** Optimized structure of **Z-4a**.

Below are presented xyz coordinates for optimized geometry of **Z-4a**:

|   |             |             |             |
|---|-------------|-------------|-------------|
| C | -2.27856300 | -0.53384700 | 0.90967500  |
| H | -2.99303400 | -0.77080100 | 1.70524800  |
| P | -0.68497000 | -0.59820400 | 1.42095900  |
| P | 0.45805400  | -0.09990700 | -0.43008300 |
| C | 0.90181100  | 1.72731700  | -0.08966400 |
| C | -0.35548700 | 2.50930000  | -0.51375400 |
| C | 1.23362400  | 2.10161400  | 1.36252000  |
| C | 2.06525900  | 2.14691600  | -1.00005800 |
| H | -0.61358600 | 2.32295100  | -1.56122000 |
| H | -1.21968800 | 2.24423600  | 0.10459200  |
| H | -0.17900200 | 3.58503900  | -0.39063100 |
| H | 2.10680600  | 1.56961700  | 1.74404000  |
| H | 1.44820500  | 3.17674400  | 1.41807500  |
| H | 0.39525700  | 1.90053000  | 2.03653100  |
| H | 2.16951800  | 3.23886400  | -0.97649900 |
| H | 3.01637300  | 1.72244600  | -0.66648200 |
| H | 1.89829200  | 1.84885000  | -2.04069900 |
| C | 1.98426700  | -1.21366800 | -0.18180700 |
| C | 2.81644500  | -1.16852000 | -1.47653900 |
| C | 2.88275900  | -0.89400800 | 1.01858300  |
| C | 1.43870100  | -2.64700200 | -0.03331700 |
| H | 2.20718200  | -1.42557400 | -2.34878700 |
| H | 3.26358300  | -0.18797300 | -1.65358100 |
| H | 3.63513700  | -1.89614600 | -1.40837500 |
| H | 2.32002800  | -0.87023500 | 1.95714800  |
| H | 3.65660300  | -1.66670300 | 1.11301600  |
| H | 3.39518600  | 0.06458200  | 0.89813500  |
| H | 2.27289100  | -3.35800000 | -0.07351800 |
| H | 0.92391700  | -2.79690700 | 0.92105900  |
| H | 0.74271300  | -2.90054600 | -0.84071100 |
| C | -2.93760800 | -0.24267900 | -0.41089700 |
| C | -3.57355800 | -1.52989400 | -0.95820900 |
| C | -3.98971900 | 0.86303800  | -0.25061800 |
| H | -2.17897400 | 0.09122500  | -1.12521000 |
| H | -4.31910500 | -1.92757100 | -0.25973900 |
| H | -2.81428000 | -2.29962200 | -1.12237900 |
| H | -4.77733200 | 0.55537900  | 0.44728800  |
| H | -3.54472800 | 1.78741200  | 0.12941800  |
| H | -4.07510400 | -1.33023200 | -1.91101800 |
| H | -4.46068800 | 1.08269000  | -1.21431800 |

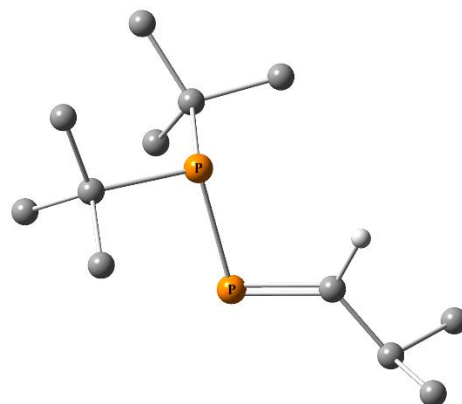

**Figure S227.** Optimized structure of *E-4a*.

Below are presented xyz coordinates for optimized geometry of *E-4a*:

|   |             |             |             |
|---|-------------|-------------|-------------|
| C | -2.20672300 | -0.23143600 | -0.20095900 |
| H | -2.05954400 | 0.03792600  | -1.25014900 |
| P | -0.90274800 | -0.51477300 | 0.81015300  |
| P | 0.75113300  | -0.08302300 | -0.61513800 |
| C | 1.23968600  | 1.68474300  | -0.07255200 |
| C | 0.23053300  | 2.60085300  | -0.79046800 |
| C | 1.17875400  | 1.98522000  | 1.43248500  |
| C | 2.64529500  | 2.01105400  | -0.59888000 |
| H | 0.27964100  | 2.47903600  | -1.87714800 |
| H | -0.79792700 | 2.40033600  | -0.47137600 |
| H | 0.45327600  | 3.64853900  | -0.55256300 |
| H | 1.85090500  | 1.35227200  | 2.01467500  |
| H | 1.47119300  | 3.02916700  | 1.60481500  |
| H | 0.16741000  | 1.85980400  | 1.83136200  |
| H | 2.83121600  | 3.08713100  | -0.49287900 |
| H | 3.42418400  | 1.48979900  | -0.03539100 |
| H | 2.75427500  | 1.75660200  | -1.65864800 |
| C | 2.06388400  | -1.33594000 | -0.03435200 |
| C | 3.21486800  | -1.33049300 | -1.05728100 |
| C | 2.62782600  | -1.13634100 | 1.37742900  |
| C | 1.38571100  | -2.71746900 | -0.11035100 |
| H | 2.84374300  | -1.50040000 | -2.07297400 |
| H | 3.77452900  | -0.39277900 | -1.05415400 |
| H | 3.92044300  | -2.13549700 | -0.81559700 |
| H | 1.83607200  | -1.09542800 | 2.13235300  |
| H | 3.28694600  | -1.97665600 | 1.63104700  |
| H | 3.22389200  | -0.22268700 | 1.45293000  |
| H | 2.14039900  | -3.50010400 | 0.03448000  |
| H | 0.62422800  | -2.84743500 | 0.66538600  |
| H | 0.91215800  | -2.88337800 | -1.08423600 |
| C | -3.64559000 | -0.30988300 | 0.23225500  |
| C | -4.30729300 | 1.07054900  | 0.10220500  |
| C | -4.39281100 | -1.35768400 | -0.60536100 |
| H | -3.68482000 | -0.61363900 | 1.28611900  |
| H | -4.27627600 | 1.41930600  | -0.93666100 |
| H | -3.79746900 | 1.81154600  | 0.72474700  |
| H | -4.37222900 | -1.09112600 | -1.66848500 |
| H | -3.93929200 | -2.34670900 | -0.49485100 |
| H | -5.44068400 | -1.42137700 | -0.29392500 |
| H | -5.35688500 | 1.02365400  | 0.41087500  |

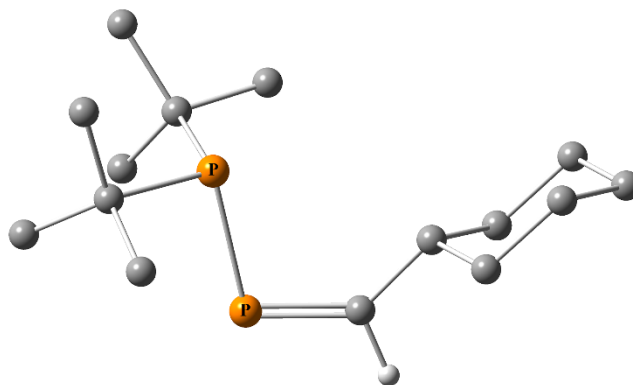

**Figure S228.** Optimized structure of **Z-4b**.

Below are presented xyz coordinates for optimized geometry of **Z-4b**

|   |             |             |             |
|---|-------------|-------------|-------------|
| C | -1.27300500 | -0.47352400 | 1.55403700  |
| H | -1.80576900 | -0.67421000 | 2.48933500  |
| P | 0.39239600  | -0.53799300 | 1.72125300  |
| P | 1.12005100  | -0.12357600 | -0.34829300 |
| C | 1.59200600  | 1.72238000  | -0.19961500 |
| C | 0.26199100  | 2.47402900  | -0.39533800 |
| C | 2.20769700  | 2.17493900  | 1.13266300  |
| C | 2.53701500  | 2.10055200  | -1.34956700 |
| H | -0.20478500 | 2.22809100  | -1.35473300 |
| H | -0.45084700 | 2.24079000  | 0.40243900  |
| H | 0.44336600  | 3.55570200  | -0.37013100 |
| H | 3.14852300  | 1.66796000  | 1.35361800  |
| H | 2.41238000  | 3.25253900  | 1.08831600  |
| H | 1.52787700  | 2.00588700  | 1.97337300  |
| H | 2.62565200  | 3.19285000  | -1.40263700 |
| H | 3.54329300  | 1.69996600  | -1.19801500 |
| H | 2.16500800  | 1.74741300  | -2.31731100 |
| C | 2.68469500  | -1.21105400 | -0.36840200 |
| C | 3.23110300  | -1.22567900 | -1.80797500 |
| C | 3.80566400  | -0.82443300 | 0.60350400  |
| C | 2.20762300  | -2.63940800 | -0.04203100 |
| H | 2.45941400  | -1.53072000 | -2.52182900 |
| H | 3.61547300  | -0.25252000 | -2.12097100 |
| H | 4.05846800  | -1.94348300 | -1.87572800 |
| H | 3.44811400  | -0.75727200 | 1.63588300  |
| H | 4.59577900  | -1.58576000 | 0.57291400  |
| H | 4.26563400  | 0.13047600  | 0.33399300  |
| H | 3.02771800  | -3.34507400 | -0.22239700 |
| H | 1.90601000  | -2.74592800 | 1.00475700  |
| H | 1.36324700  | -2.93797100 | -0.67323700 |
| C | -2.18429600 | -0.21940900 | 0.39054100  |
| C | -2.92746400 | -1.51393300 | 0.00470500  |
| C | -3.19387300 | 0.89735700  | 0.71232500  |
| H | -1.58961100 | 0.08986000  | -0.47686200 |
| C | -3.89170600 | -1.27550100 | -1.16078700 |
| H | -3.48671100 | -1.88248700 | 0.87699700  |
| H | -2.19537100 | -2.28598500 | -0.25548700 |
| C | -4.15246500 | 1.13648800  | -0.45695000 |
| H | -3.77030400 | 0.61268700  | 1.60475000  |
| H | -2.66087800 | 1.82118000  | 0.96348800  |
| C | -4.88271700 | -0.15023400 | -0.85111000 |
| H | -4.42805000 | -2.20181400 | -1.39466600 |
| H | -3.31161400 | -1.01116800 | -2.05546500 |
| H | -4.87301800 | 1.91893200  | -0.19428200 |
| H | -3.58157100 | 1.50849500  | -1.31900600 |
| H | -5.53255300 | 0.03114600  | -1.71432400 |
| H | -5.53519200 | -0.46146200 | -0.02318700 |

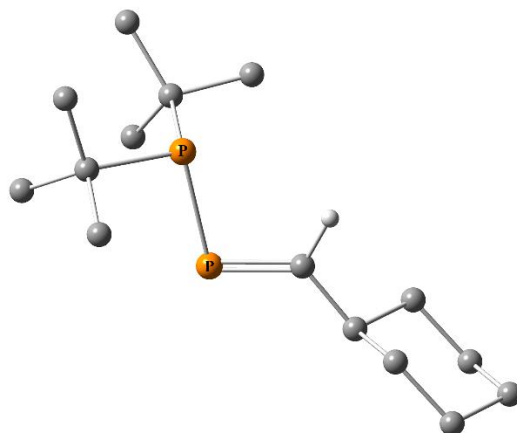

**Figure S229.** Optimized structure of *E-4b*.

Below are presented xyz coordinates for optimized geometry of *E-4b*:

|   |             |             |             |
|---|-------------|-------------|-------------|
| C | -1.29195100 | -0.21235000 | -0.19835600 |
| H | -1.14145700 | 0.04011200  | -1.25103300 |
| P | 0.01003400  | -0.49962500 | 0.81451300  |
| P | 1.66654600  | -0.10707800 | -0.61816800 |
| C | 2.15488900  | 1.67510700  | -0.12376300 |
| C | 1.14837100  | 2.57175800  | -0.86940900 |
| C | 2.09022400  | 2.01785700  | 1.37208800  |
| C | 3.56210700  | 1.98542800  | -0.65546400 |
| H | 1.19935100  | 2.41907700  | -1.95211400 |
| H | 0.11908400  | 2.38177900  | -0.54657500 |
| H | 1.37219500  | 3.62547200  | -0.66086000 |
| H | 2.76088600  | 1.40167800  | 1.97368900  |
| H | 2.38221000  | 3.06629500  | 1.51564000  |
| H | 1.07779200  | 1.90354400  | 1.77154800  |
| H | 3.74893100  | 3.06384800  | -0.57870300 |
| H | 4.33915900  | 1.47914500  | -0.07598400 |
| H | 3.67330300  | 1.70170200  | -1.70753300 |
| C | 2.97763400  | -1.34372500 | -0.00039000 |
| C | 4.13021400  | -1.36844200 | -1.02120500 |
| C | 3.53960800  | -1.10408700 | 1.40595600  |
| C | 2.29849600  | -2.72637400 | -0.03775600 |
| H | 3.76044300  | -1.56648700 | -2.03228100 |
| H | 4.69091000  | -0.43159500 | -1.04366100 |
| H | 4.83455900  | -2.16706000 | -0.75582700 |
| H | 2.74665700  | -1.04167200 | 2.15815400  |
| H | 4.19842600  | -1.93676900 | 1.68437400  |
| H | 4.13539100  | -0.18846400 | 1.45620700  |
| H | 3.05211500  | -3.50508100 | 0.13179900  |
| H | 1.53473000  | -2.83277700 | 0.73934000  |
| H | 1.82729000  | -2.92018000 | -1.00763100 |
| C | -2.72630500 | -0.26099200 | 0.23922000  |
| C | -3.37563600 | 1.13155000  | 0.11209600  |
| C | -3.51407900 | -1.29437500 | -0.58826700 |
| H | -2.77234100 | -0.56079700 | 1.29642200  |
| C | -4.85678900 | 1.10237600  | 0.49901800  |
| H | -3.27583000 | 1.47567300  | -0.92770800 |
| H | -2.82910000 | 1.84658600  | 0.73698600  |
| C | -4.99470100 | -1.32028800 | -0.19917100 |
| H | -3.42107800 | -1.03980900 | -1.65408000 |
| H | -3.06497300 | -2.28505000 | -0.45888700 |
| C | -5.63030500 | 0.06709400  | -0.32183500 |
| H | -5.29464600 | 2.09805700  | 0.36768400  |
| H | -4.94519400 | 0.85703500  | 1.56638800  |
| H | -5.53070800 | -2.04208400 | -0.82527100 |
| H | -5.08899100 | -1.67106100 | 0.83784300  |
| H | -6.67757000 | 0.03478300  | -0.00176300 |
| H | -5.63089700 | 0.37143000  | -1.37790400 |

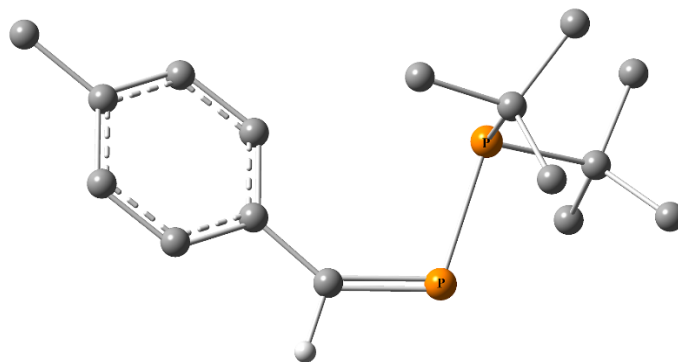

**Figure S230.** Optimized structure of **Z-4c**.

Below are presented xyz coordinates for optimized geometry of **Z-4c**:

|   |             |             |             |
|---|-------------|-------------|-------------|
| C | 3.23333600  | 0.14659500  | 1.35470900  |
| C | 2.08977000  | -0.39468500 | 0.78514600  |
| C | 2.11668900  | -0.92187200 | -0.51552500 |
| C | 3.34039900  | -0.89934400 | -1.20214300 |
| C | 4.47902600  | -0.34148500 | -0.63158900 |
| C | 4.44601400  | 0.19482500  | 0.65712200  |
| H | 3.18437400  | 0.54088300  | 2.36673200  |
| H | 5.40860300  | -0.33117100 | -1.19458500 |
| C | 0.95898600  | -1.52766500 | -1.18592000 |
| H | 1.26307400  | -2.20106700 | -1.99190600 |
| P | -0.72095300 | -1.46515700 | -1.12951600 |
| P | -1.31288900 | 0.00858200  | 0.43746900  |
| C | -1.38930600 | 1.61658300  | -0.59592800 |
| C | 0.06546300  | 2.12039200  | -0.64243600 |
| C | -1.90235500 | 1.49034500  | -2.03798600 |
| C | -2.23875500 | 2.65431900  | 0.15300500  |
| H | 0.47283200  | 2.27650800  | 0.36129100  |
| H | 0.72300900  | 1.42083100  | -1.16754800 |
| H | 0.10129300  | 3.07657400  | -1.17942000 |
| H | -2.92500400 | 1.11264800  | -2.08960000 |
| H | -1.88873100 | 2.48066700  | -2.51125200 |
| H | -1.26756200 | 0.83222300  | -2.63873300 |
| H | -2.09794900 | 3.63820200  | -0.31159300 |
| H | -3.30614400 | 2.42146100  | 0.10314400  |
| H | -1.94947600 | 2.73741100  | 1.20606900  |
| C | -3.06965600 | -0.63611500 | 0.80327900  |
| C | -3.60843000 | 0.13749000  | 2.02093300  |
| C | -4.08505100 | -0.56289000 | -0.34313900 |
| C | -2.89971400 | -2.10642800 | 1.23239900  |
| H | -2.91668400 | 0.07697400  | 2.86710400  |
| H | -3.78575300 | 1.19282900  | 1.80367500  |
| H | -4.56532800 | -0.29923400 | 2.33373600  |
| H | -3.72052200 | -1.06145700 | -1.24684400 |
| H | -5.01516600 | -1.06075000 | -0.04031900 |
| H | -4.33809200 | 0.47052400  | -0.59604100 |
| H | -3.84996000 | -2.47664500 | 1.63614100  |
| H | -2.62436400 | -2.75429800 | 0.39445900  |
| H | -2.13931900 | -2.21462600 | 2.01377300  |
| C | 5.66820500  | 0.81911600  | 1.27915500  |
| H | 5.59613200  | 1.91233400  | 1.26286900  |
| H | 5.78058900  | 0.51371700  | 2.32373300  |
| H | 6.57778800  | 0.53749200  | 0.74225400  |
| H | 1.16496200  | -0.40878200 | 1.34999700  |
| H | 3.39731900  | -1.31970200 | -2.20293200 |

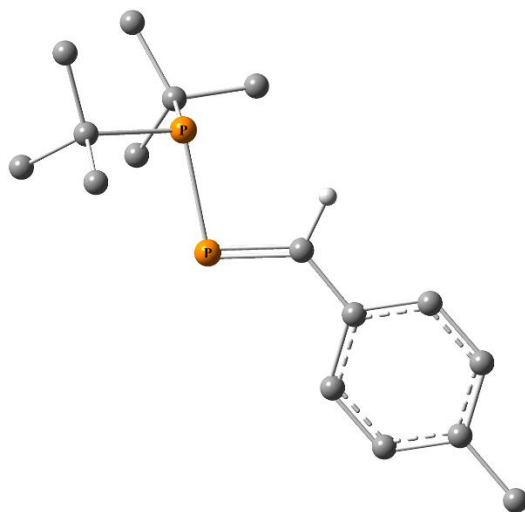

**Figure S231.** Optimized structure of *E-4c*.

Below are presented xyz coordinates for optimized geometry of *E-4c*:

|   |             |             |             |
|---|-------------|-------------|-------------|
| C | -4.75947600 | 0.26544400  | -1.17166400 |
| C | -3.37715500 | 0.28375000  | -1.33424000 |
| C | -2.51765100 | -0.04093000 | -0.27646500 |
| C | -3.09888100 | -0.37886100 | 0.95854900  |
| C | -4.47511200 | -0.39667100 | 1.11490100  |
| C | -5.33320700 | -0.07510300 | 0.05343100  |
| H | -5.39960300 | 0.52054000  | -2.01195300 |
| H | -4.89892000 | -0.66203300 | 2.08027000  |
| C | -1.06980800 | -0.02049600 | -0.50004800 |
| H | -0.77516000 | 0.31105200  | -1.49656400 |
| P | 0.12432900  | -0.46131800 | 0.60480400  |
| P | 1.90368600  | 0.00024100  | -0.64277500 |
| C | 2.47303900  | 1.65131600  | 0.13634700  |
| C | 1.58258400  | 2.71675400  | -0.53065600 |
| C | 2.32405200  | 1.78193300  | 1.65945300  |
| C | 3.93191000  | 1.92680500  | -0.25706800 |
| H | 1.70266400  | 2.71676400  | -1.61866700 |
| H | 0.52260600  | 2.55920600  | -0.30450800 |
| H | 1.85732300  | 3.71059400  | -0.15576200 |
| H | 2.90886600  | 1.03842300  | 2.20401400  |
| H | 2.67232100  | 2.77473300  | 1.97256100  |
| H | 1.28034100  | 1.68737900  | 1.97490900  |
| H | 4.18241600  | 2.96674600  | -0.01323000 |
| H | 4.63062400  | 1.28752500  | 0.28977700  |
| H | 4.09972800  | 1.78639800  | -1.33032900 |
| C | 3.07913600  | -1.40936100 | -0.13155200 |
| C | 4.29968600  | -1.37480600 | -1.06996100 |
| C | 3.55030000  | -1.41678600 | 1.32746400  |
| C | 2.31544100  | -2.71689700 | -0.41640500 |
| H | 3.99332000  | -1.39839000 | -2.12059900 |
| H | 4.92109400  | -0.48971400 | -0.91845800 |
| H | 4.92835400  | -2.25419200 | -0.88108500 |
| H | 2.70986200  | -1.39984400 | 2.02876600  |
| H | 4.12769600  | -2.32998900 | 1.52126200  |
| H | 4.20248800  | -0.56771000 | 1.54981500  |
| H | 3.00259400  | -3.56619100 | -0.31840200 |
| H | 1.49206600  | -2.87614300 | 0.28719000  |
| H | 1.90351600  | -2.73305000 | -1.43137600 |
| C | -6.82744300 | -0.09434600 | 0.24664500  |
| H | -7.35327300 | 0.14310900  | -0.68153900 |
| H | -7.16655400 | -1.07881400 | 0.58518200  |
| H | -7.13370600 | 0.63512900  | 1.00384700  |
| H | -2.46020900 | -0.62664800 | 1.80163700  |
| H | -2.95517900 | 0.55079900  | -2.29958000 |

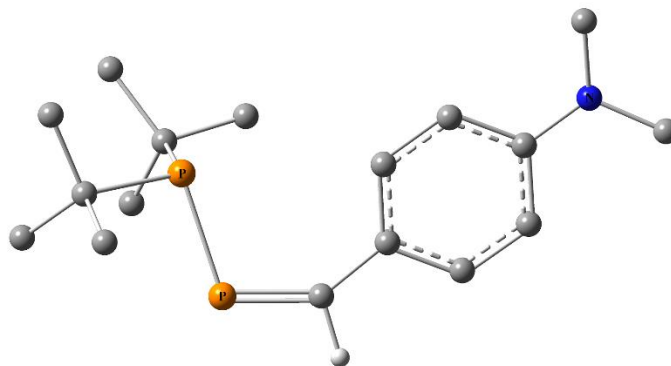

**Figure S232.** Optimized structure of **Z-4d**.

Below are presented xyz coordinates for optimized geometry of **Z-4d**:

|   |             |             |             |
|---|-------------|-------------|-------------|
| C | -2.74970500 | 0.53509700  | -0.71656900 |
| C | -1.54006600 | -0.08555900 | -0.46219100 |
| C | -1.45309700 | -1.24332800 | 0.32955900  |
| C | -2.66323700 | -1.74792400 | 0.83746600  |
| C | -3.88195300 | -1.13480800 | 0.60240300  |
| C | -3.95856100 | 0.03913500  | -0.17785400 |
| H | -2.74926500 | 1.41811300  | -1.34369400 |
| H | -4.77514500 | -1.57758100 | 1.02528600  |
| C | -0.22341300 | -1.96848200 | 0.62804700  |
| H | -0.43402000 | -2.93245100 | 1.10047100  |
| P | 1.45165300  | -1.80113000 | 0.50648200  |
| P | 1.89811700  | 0.19868900  | -0.37312300 |
| C | 2.12487400  | 1.24350700  | 1.21327000  |
| C | 0.69279800  | 1.63150200  | 1.62751900  |
| C | 2.80072600  | 0.55414300  | 2.40774700  |
| C | 2.89585400  | 2.52661300  | 0.86990900  |
| H | 0.18002200  | 2.18942000  | 0.83762300  |
| H | 0.08624300  | 0.75286000  | 1.86968300  |
| H | 0.73139900  | 2.26525600  | 2.52249000  |
| H | 3.81766600  | 0.22705100  | 2.18415000  |
| H | 2.85480500  | 1.26068200  | 3.24628700  |
| H | 2.23303700  | -0.31699300 | 2.74747200  |
| H | 2.82386000  | 3.22787300  | 1.71082400  |
| H | 3.95850200  | 2.33066400  | 0.70059400  |
| H | 2.48866400  | 3.02414300  | -0.01689100 |
| C | 3.58860200  | -0.18297900 | -1.16764600 |
| C | 4.00101900  | 1.03934800  | -2.00841500 |
| C | 4.72832800  | -0.55841600 | -0.21332700 |
| C | 3.34366700  | -1.35049700 | -2.14285400 |
| H | 3.21705800  | 1.31204900  | -2.72207100 |
| H | 4.22054700  | 1.91622800  | -1.39561400 |
| H | 4.90863600  | 0.79956200  | -2.57699600 |
| H | 4.45687600  | -1.39290000 | 0.44090300  |
| H | 5.60782300  | -0.86298700 | -0.79530100 |
| H | 5.02960000  | 0.28762500  | 0.41087000  |
| H | 4.23586100  | -1.49506200 | -2.76452700 |
| H | 3.14839300  | -2.29157200 | -1.61974000 |
| H | 2.49843200  | -1.14896600 | -2.81022900 |
| H | -0.63910500 | 0.33307800  | -0.89621800 |
| H | -2.64794700 | -2.65354600 | 1.43900000  |
| N | -5.15923200 | 0.67540500  | -0.40357200 |
| C | -5.22210400 | 1.77252600  | -1.34756300 |
| H | -4.92381400 | 1.46874700  | -2.36147600 |
| H | -6.24431300 | 2.14915200  | -1.39124800 |
| H | -4.57840000 | 2.60168600  | -1.03318600 |
| C | -6.39188400 | 0.05187700  | 0.03132200  |
| H | -6.39895600 | -0.09270500 | 1.11756200  |
| H | -7.23040400 | 0.70254500  | -0.21804000 |
| H | -6.55907200 | -0.92372000 | -0.44831200 |

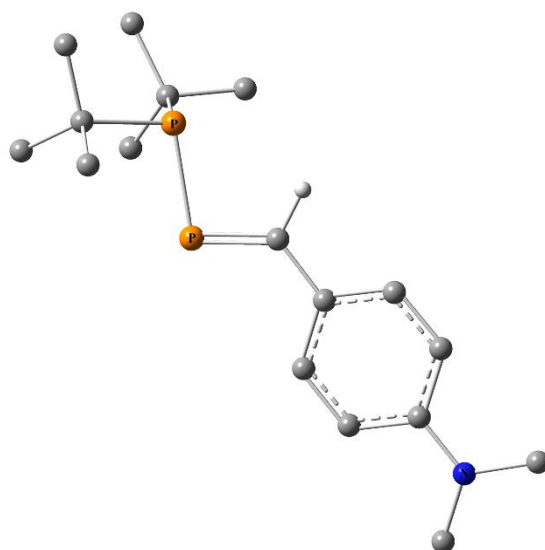

**Figure S233.** Optimized structure of *E-4d*.

Below are presented xyz coordinates for optimized geometry of *E-4d*:

|   |             |             |             |
|---|-------------|-------------|-------------|
| P | 0.82516200  | -0.42614500 | 0.61066400  |
| P | 2.61129400  | 0.03515400  | -0.62539600 |
| N | -6.01675300 | -0.12779800 | 0.08721300  |
| C | -0.36143500 | -0.00420400 | -0.51733500 |
| H | -0.04881600 | 0.32391800  | -1.50989900 |
| C | -1.80513600 | -0.03215100 | -0.32400900 |
| C | -2.41852900 | -0.38185500 | 0.89142700  |
| H | -1.79950000 | -0.63467000 | 1.74785900  |
| C | -3.79271200 | -0.40799300 | 1.03485400  |
| H | -4.20632600 | -0.67981900 | 1.99807200  |
| C | -4.64642000 | -0.08373500 | -0.04620600 |
| C | -4.03648300 | 0.28382400  | -1.26447500 |
| H | -4.63738300 | 0.55702300  | -2.12286100 |
| C | -2.65638500 | 0.30285700  | -1.38780000 |
| H | -2.22217600 | 0.58780800  | -2.34287900 |
| C | -6.60453800 | -0.35609300 | 1.39129600  |
| H | -6.30199700 | -1.32800500 | 1.79722400  |
| H | -7.69072300 | -0.36379500 | 1.29805900  |
| H | -6.32774200 | 0.42292600  | 2.11643800  |
| C | -6.85581700 | 0.35980900  | -0.98770400 |
| H | -6.67578700 | 1.42209500  | -1.20826300 |
| H | -7.90273000 | 0.24278700  | -0.70699700 |
| H | -6.69466700 | -0.21479000 | -1.90701000 |
| C | 3.23519100  | 1.63653400  | 0.21300000  |
| C | 3.10868000  | 1.70824900  | 1.74199800  |
| H | 2.06786800  | 1.61597700  | 2.06693600  |
| H | 3.47749300  | 2.68202800  | 2.08996200  |
| H | 3.68880800  | 0.93421000  | 2.24779700  |
| C | 2.36167300  | 2.74926200  | -0.39703200 |
| H | 2.46934200  | 2.79255900  | -1.48556300 |
| H | 2.66257400  | 3.72027600  | 0.01608200  |
| H | 1.30112500  | 2.60391200  | -0.16525300 |
| C | 4.69496500  | 1.89504200  | -0.18804200 |
| H | 5.38519400  | 1.21794000  | 0.32310900  |
| H | 4.97320800  | 2.91816700  | 0.09448900  |
| H | 4.84612600  | 1.79446200  | -1.26829200 |
| C | 3.75773600  | -1.42294400 | -0.18607700 |
| C | 4.97174000  | -1.37805300 | -1.13247900 |
| H | 4.65650300  | -1.35176800 | -2.18046700 |
| H | 5.58173800  | -2.27845500 | -0.98496500 |
| H | 5.61428500  | -0.51392800 | -0.95091900 |



|   |            |             |             |
|---|------------|-------------|-------------|
| C | 2.96186800 | -2.69950500 | -0.51816500 |
| H | 2.13934300 | -2.86645900 | 0.18424800  |
| H | 3.62986200 | -3.56785000 | -0.46145300 |
| H | 2.54181800 | -2.66304900 | -1.52933200 |
| C | 4.24007000 | -1.50289100 | 1.26713600  |
| H | 4.91626400 | -0.68082100 | 1.51782500  |
| H | 4.79455200 | -2.43817800 | 1.41884800  |
| H | 3.40537800 | -1.49195100 | 1.97537700  |

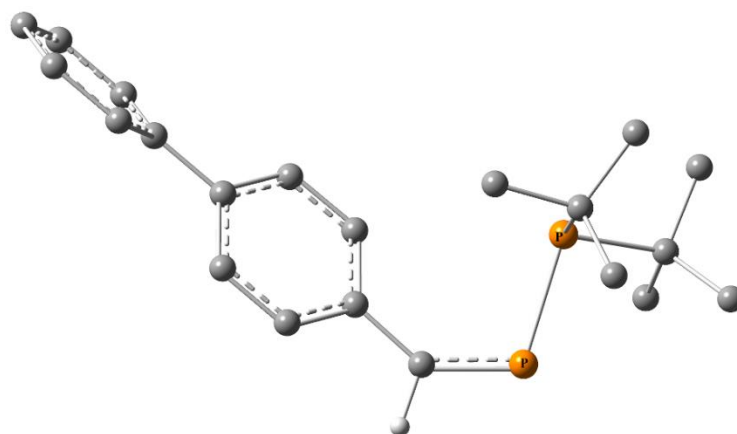

**Figure S234.** Optimized structure of **Z-4e**.

Below are presented xyz coordinates for optimized geometry of **Z-4e**:

|   |             |             |             |
|---|-------------|-------------|-------------|
| C | -0.79639300 | 2.27711500  | 0.42117700  |
| C | 0.52210400  | 1.65938500  | 0.21753400  |
| C | 0.79045100  | 0.70062000  | -0.76932300 |
| H | -0.00613400 | 0.36776400  | -1.42385000 |
| C | 2.06042900  | 0.15747400  | -0.90452300 |
| H | 2.23454200  | -0.59888700 | -1.66431100 |
| C | 3.11053900  | 0.54342400  | -0.06188200 |
| C | 2.84913400  | 1.51323900  | 0.91278600  |
| H | 3.65244000  | 1.85690300  | 1.55780800  |
| C | 1.58313000  | 2.06919400  | 1.03974100  |
| H | 1.40852000  | 2.83157700  | 1.79436400  |
| C | 4.46315100  | -0.05100800 | -0.20328600 |
| C | 5.02265100  | -0.26742600 | -1.46853100 |
| H | 4.46824000  | 0.02503500  | -2.35555500 |
| C | 6.29115700  | -0.82491800 | -1.60010700 |
| H | 6.71148900  | -0.97770800 | -2.58934200 |
| C | 7.02366400  | -1.17572400 | -0.46796500 |
| H | 8.01306300  | -1.61021600 | -0.57032200 |
| C | 6.47757600  | -0.96498300 | 0.79640200  |
| H | 7.03722300  | -1.24258800 | 1.68431200  |
| C | 5.20864000  | -0.40824300 | 0.92696000  |
| H | 4.78032200  | -0.26925800 | 1.91544100  |
| C | -2.44259400 | -1.20501500 | 1.27553200  |
| C | -3.19319900 | -0.54651000 | 2.44237400  |
| H | -4.25990600 | -0.42794300 | 2.24412400  |
| H | -3.08847000 | -1.17495800 | 3.33620300  |
| H | -2.78226200 | 0.43780400  | 2.68604400  |
| C | -0.95012200 | -1.29091100 | 1.64670800  |
| H | -0.51540900 | -0.30226300 | 1.82131000  |
| H | -0.84001900 | -1.86939500 | 2.57251600  |
| H | -0.36404500 | -1.78258500 | 0.86416200  |
| C | -2.97421300 | -2.63220500 | 1.07413400  |
| H | -4.05946200 | -2.64972700 | 0.94047700  |
| H | -2.50908400 | -3.12484700 | 0.21365400  |
| H | -2.74616900 | -3.23005600 | 1.96527600  |
| C | -4.23716400 | -0.30388100 | -1.13741600 |
| C | -4.43009000 | -1.65050800 | -1.85912500 |
| H | -3.63104200 | -1.82931900 | -2.58556300 |

|   |             |             |             |
|---|-------------|-------------|-------------|
| H | -4.45626800 | -2.49702800 | -1.16993200 |
| H | -5.38410300 | -1.63809600 | -2.40122600 |
| C | -4.25654800 | 0.79955800  | -2.21305600 |
| H | -3.41087600 | 0.70664300  | -2.90353600 |
| H | -5.17892800 | 0.71510200  | -2.80043900 |
| H | -4.23542300 | 1.80369500  | -1.77810700 |
| C | -5.39686800 | -0.07212100 | -0.16175000 |
| H | -5.50411800 | -0.89935000 | 0.54534700  |
| H | -5.27640800 | 0.85574300  | 0.40634200  |
| H | -6.33766000 | 0.00052800  | -0.72234600 |
| P | -2.41257200 | 1.83789300  | 0.27919100  |
| P | -2.47750100 | -0.28637300 | -0.40209000 |
| H | -0.72156100 | 3.29129300  | 0.82231600  |

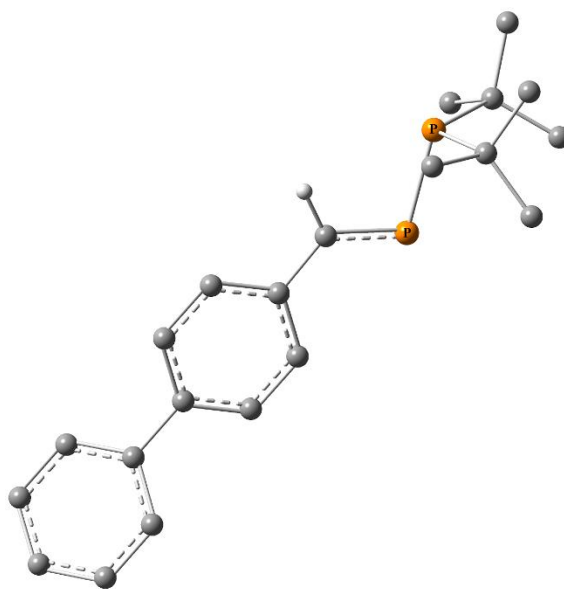

**Figure S235.** Optimized structure of *E-4e*.

Below are presented xyz coordinates for optimized geometry of *E-4e*:

|   |             |             |             |
|---|-------------|-------------|-------------|
| C | 0.44909700  | -0.09787500 | -0.56315900 |
| C | -1.00434300 | -0.07647000 | -0.37814800 |
| C | -1.61943000 | -0.20785300 | 0.87802700  |
| H | -1.00530200 | -0.32608600 | 1.76615100  |
| C | -2.99959400 | -0.19534100 | 1.00042900  |
| H | -3.44943600 | -0.32281900 | 1.98066000  |
| C | -3.82597400 | -0.04604400 | -0.12322200 |
| C | -3.21727700 | 0.09118700  | -1.37513700 |
| H | -3.83265800 | 0.23449500  | -2.25837200 |
| C | -1.83365200 | 0.07695900  | -1.49890100 |
| H | -1.38358300 | 0.19225700  | -2.48131100 |
| C | -5.30364300 | -0.03027400 | 0.01354900  |
| C | -5.91873000 | 0.66483600  | 1.06208800  |
| H | -5.30680700 | 1.21732600  | 1.76925500  |
| C | -7.30457400 | 0.67996200  | 1.18990300  |
| H | -7.76355400 | 1.23117600  | 2.00483700  |
| C | -8.10075900 | -0.00002300 | 0.27065900  |
| H | -9.18154700 | 0.01163200  | 0.37005900  |
| C | -7.50027100 | -0.69531300 | -0.77686400 |
| H | -8.11179100 | -1.23526900 | -1.49318300 |
| C | -6.11435400 | -0.71035900 | -0.90362300 |
| H | -5.65327000 | -1.27495600 | -1.70886800 |
| C | 3.96523000  | 1.64732000  | -0.10249800 |
| C | 3.75990700  | 2.02554900  | 1.37183600  |
| H | 4.32164600  | 1.38361500  | 2.05284200  |
| H | 4.09879300  | 3.05748600  | 1.53043700  |

|   |            |             |             |
|---|------------|-------------|-------------|
| H | 2.70472500 | 1.98088400  | 1.65875300  |
| C | 3.10037100 | 2.58327100  | -0.96780900 |
| H | 2.03271900 | 2.45953000  | -0.75727500 |
| H | 3.36162700 | 3.62673000  | -0.75193100 |
| H | 3.26029700 | 2.40496900  | -2.03587100 |
| C | 5.43779500 | 1.86257500  | -0.48231300 |
| H | 6.11534100 | 1.32458800  | 0.18655100  |
| H | 5.64483000 | 1.55002600  | -1.51149500 |
| H | 5.67979000 | 2.92966600  | -0.40254400 |
| C | 4.58509200 | -1.41162900 | 0.15690200  |
| C | 5.83716300 | -1.52330700 | -0.73270700 |
| H | 5.56724300 | -1.72163300 | -1.77484300 |
| H | 6.45175800 | -0.62100900 | -0.70807100 |
| H | 6.46001100 | -2.35524600 | -0.38051900 |
| C | 3.83319800 | -2.75343000 | 0.06546100  |
| H | 3.45790800 | -2.93988400 | -0.94671600 |
| H | 4.51713700 | -3.57017200 | 0.32654800  |
| H | 2.98547900 | -2.80035200 | 0.75654800  |
| C | 5.00568200 | -1.17528600 | 1.61224800  |
| H | 5.64729100 | -0.29563500 | 1.71365200  |
| H | 4.14166200 | -1.05072000 | 2.27284400  |
| H | 5.57875800 | -2.03928000 | 1.97265300  |
| P | 1.60711700 | -0.37851000 | 0.62822400  |
| P | 3.42637800 | -0.11357200 | -0.61899600 |
| H | 0.77290000 | 0.07917900  | -1.58953300 |

## PART F. Experimental and theoretical UV-VIS spectra of phosphalkenes isolated in the solid state form

UV-VIS Solution electronic spectra were recorded in the range 250-650 nm on a Unicam SP300 spectrometer. Quartz cuvettes and pentane as solvent were used. TD-DFT calculations for **3a**, **3c**, **3d**, **3e**, **3f**, **4d** and **4e** were carried out using CAM-B3LYP functional with 6-31+G(d,p) basis set including presence of a solvent (pentane) using the CPCM polarizable conductor calculation model.<sup>16</sup>

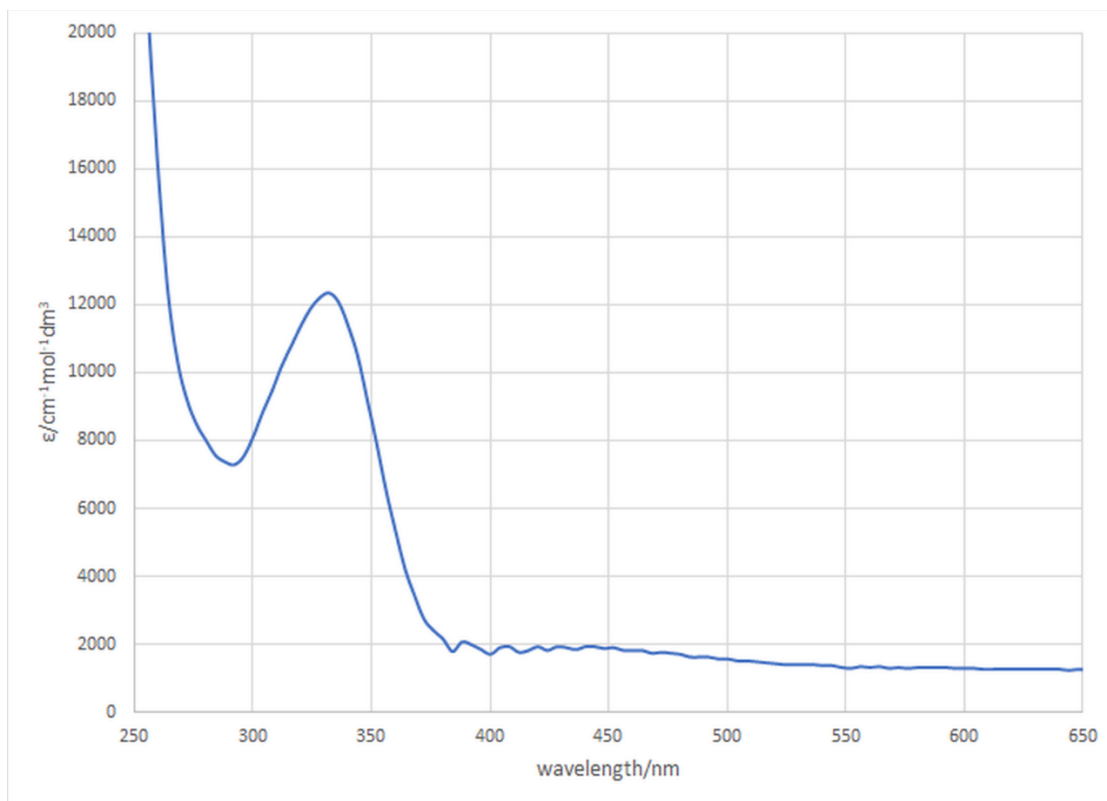

Figure S236. UV-VIS spectrum for phosphanylphosphaalkene **3a** in pentane.

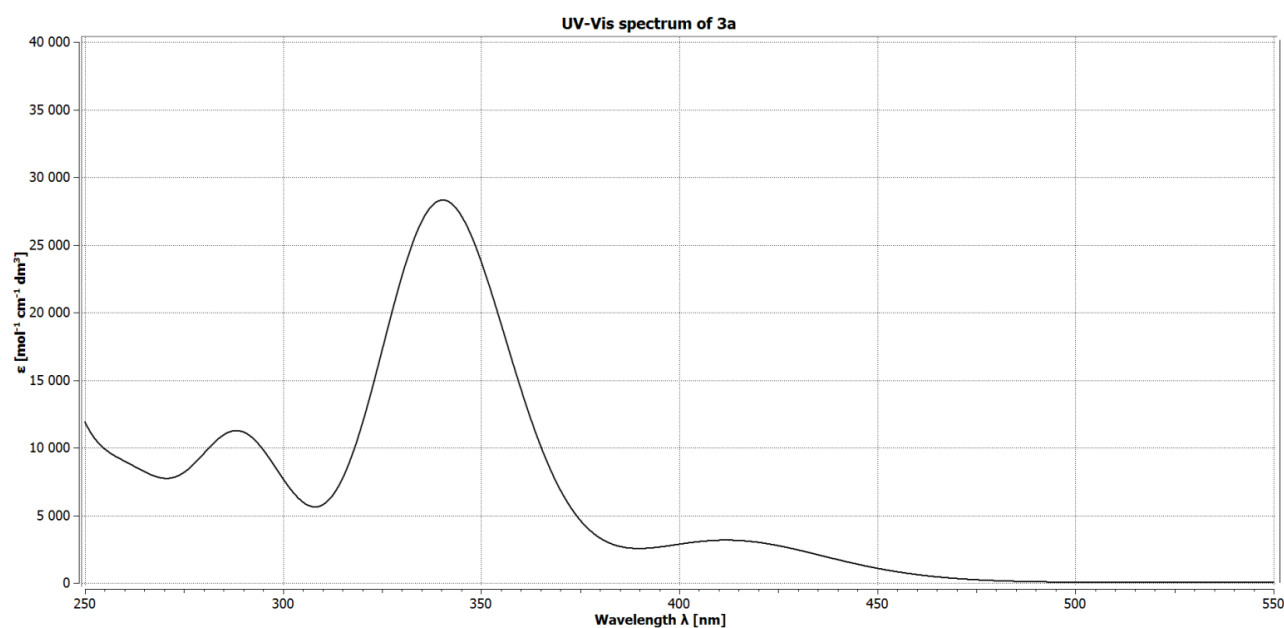

Figure S237. Theoretical UV-VIS spectrum for phosphanylphosphaalkene **3a**.

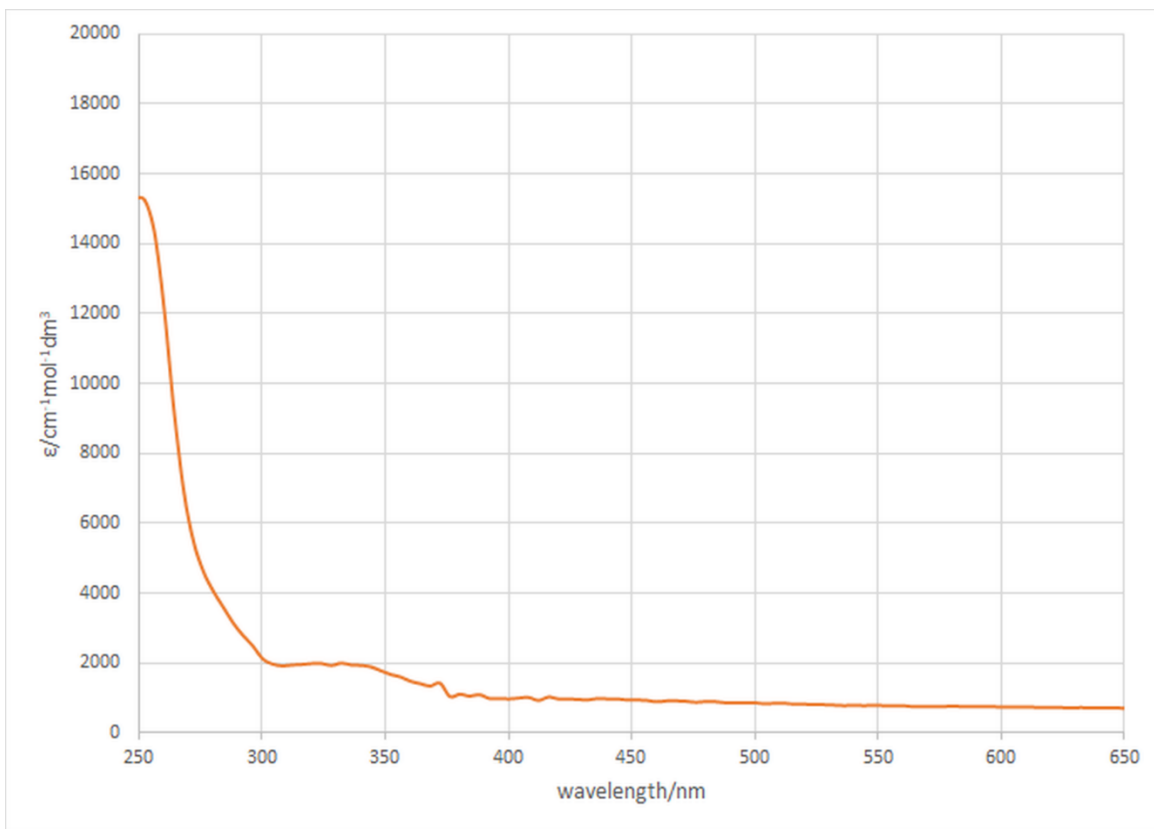

**Figure S238.** UV-VIS spectrum for phosphanylphosphaalkene **3c** in pentane.

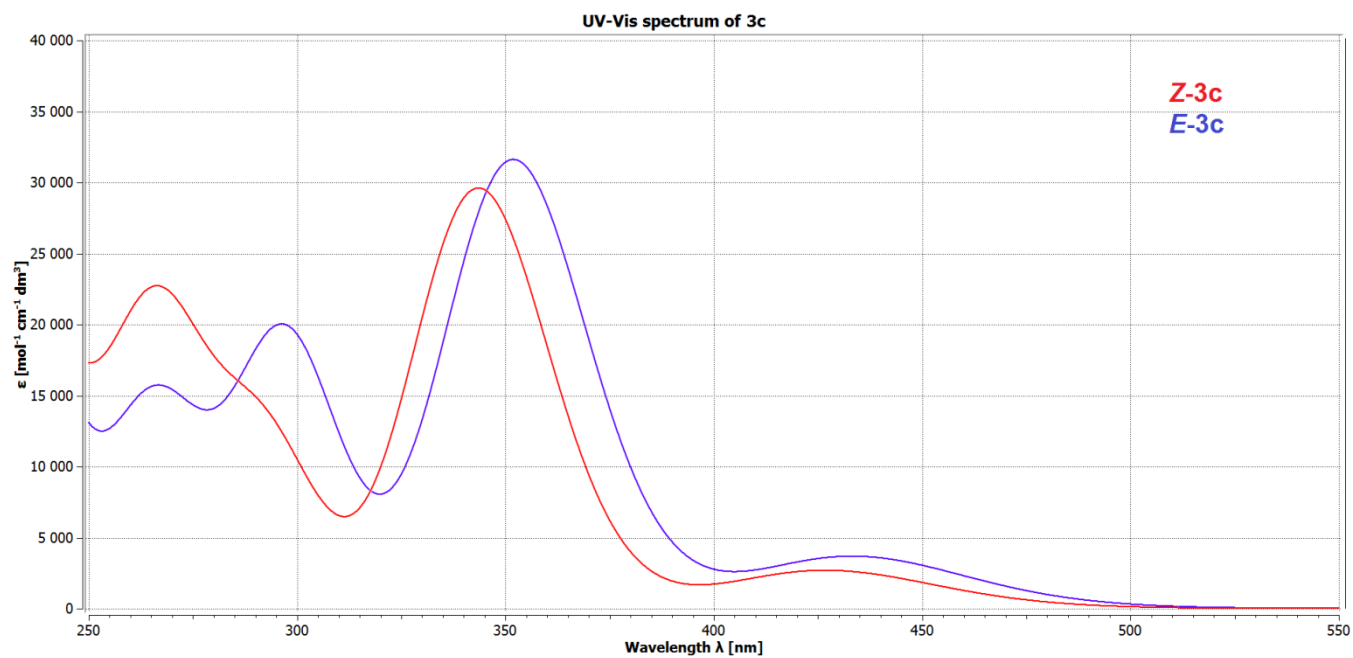

**Figure S239.** Theoretical UV-VIS spectrum for phosphanylphosphaalkene **3c**.

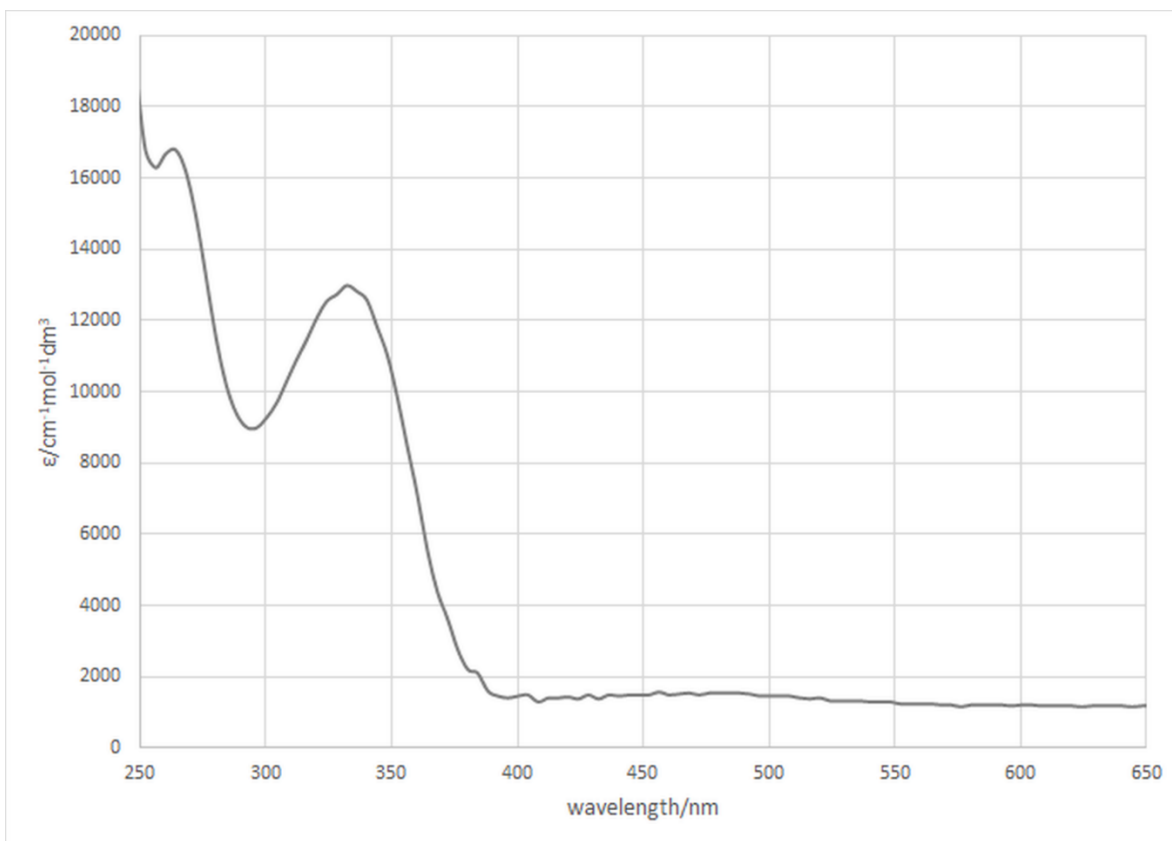

**Figure S240.** UV-VIS spectrum for phosphanylphosphaalkene **3d** in pentane.

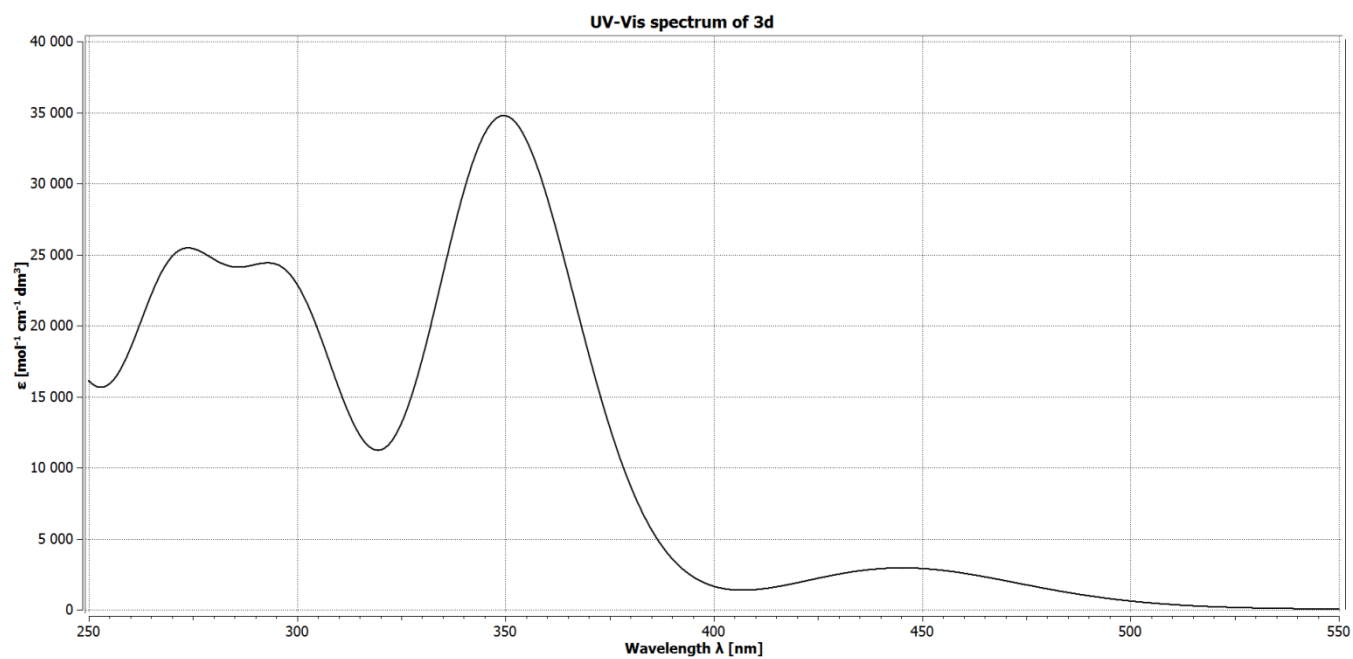

**Figure S241.** Theoretical UV-Vis spectrum for phosphanylphosphaalkene **3d**.

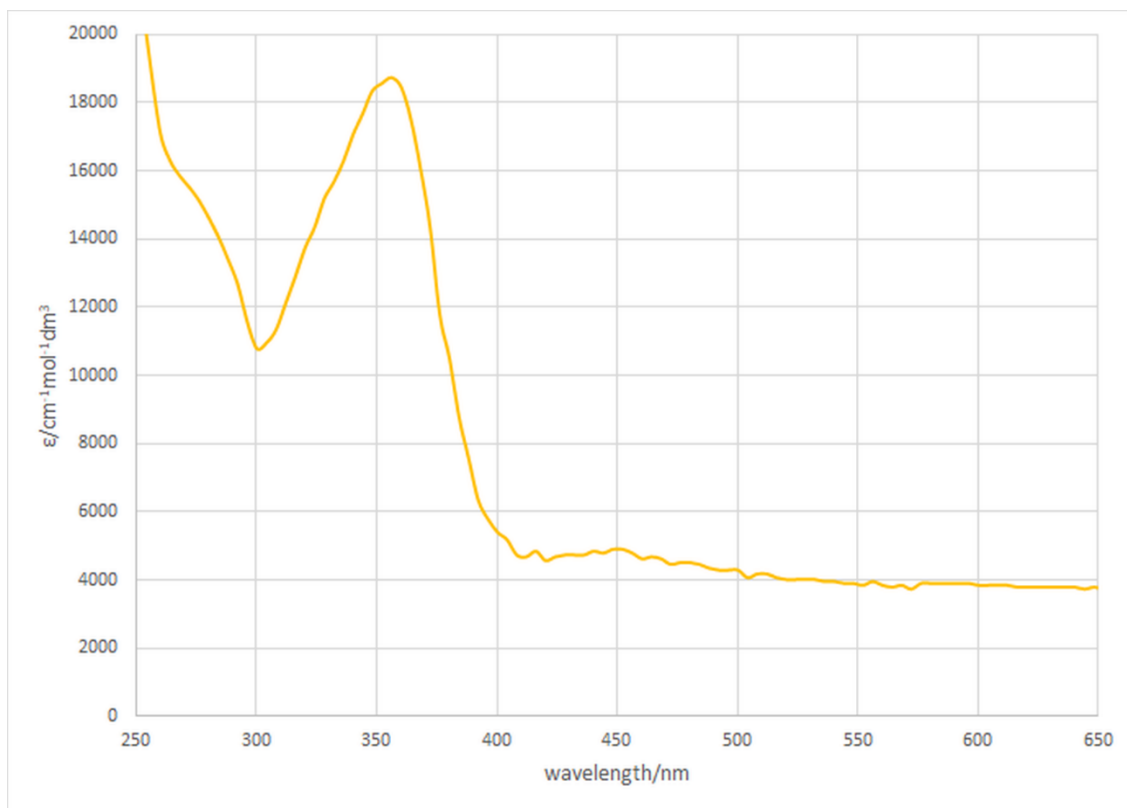

**Figure S242.** UV-VIS spectrum for phosphanylphosphaalkene **3e** in pentane.

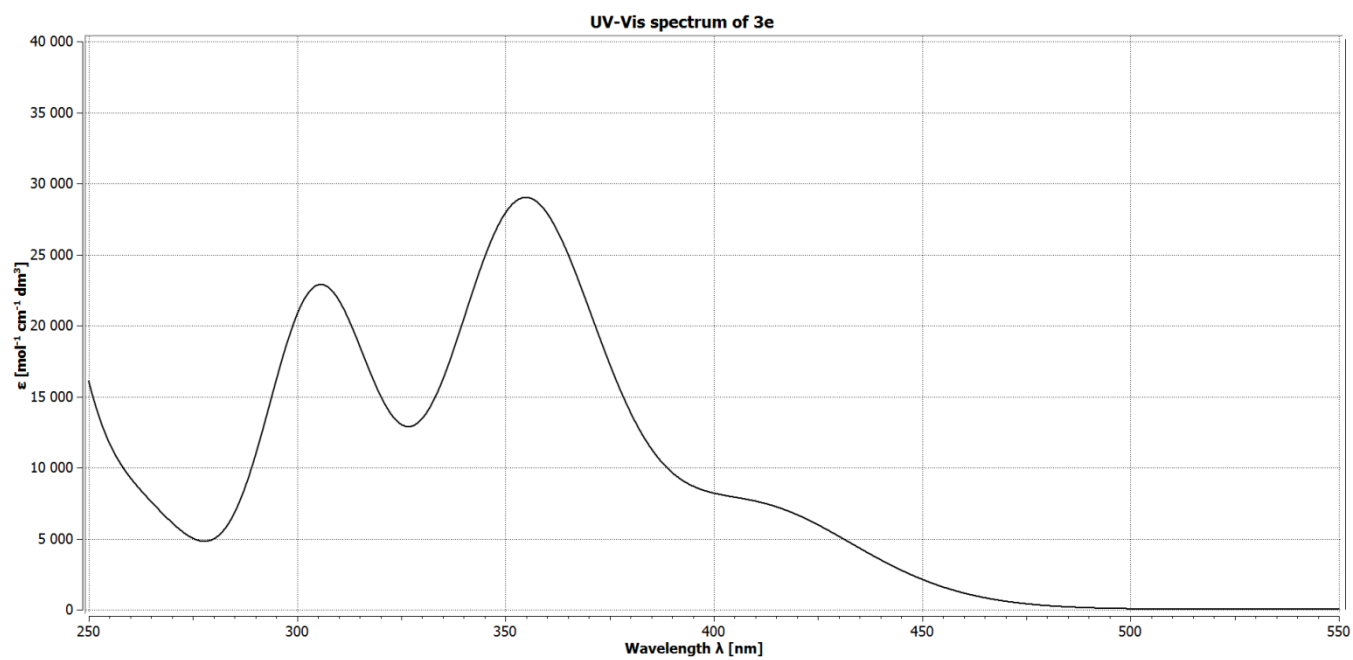

**Figure S243.** Theoretical UV-VIS spectrum for phosphanylphosphaalkene **3e**.

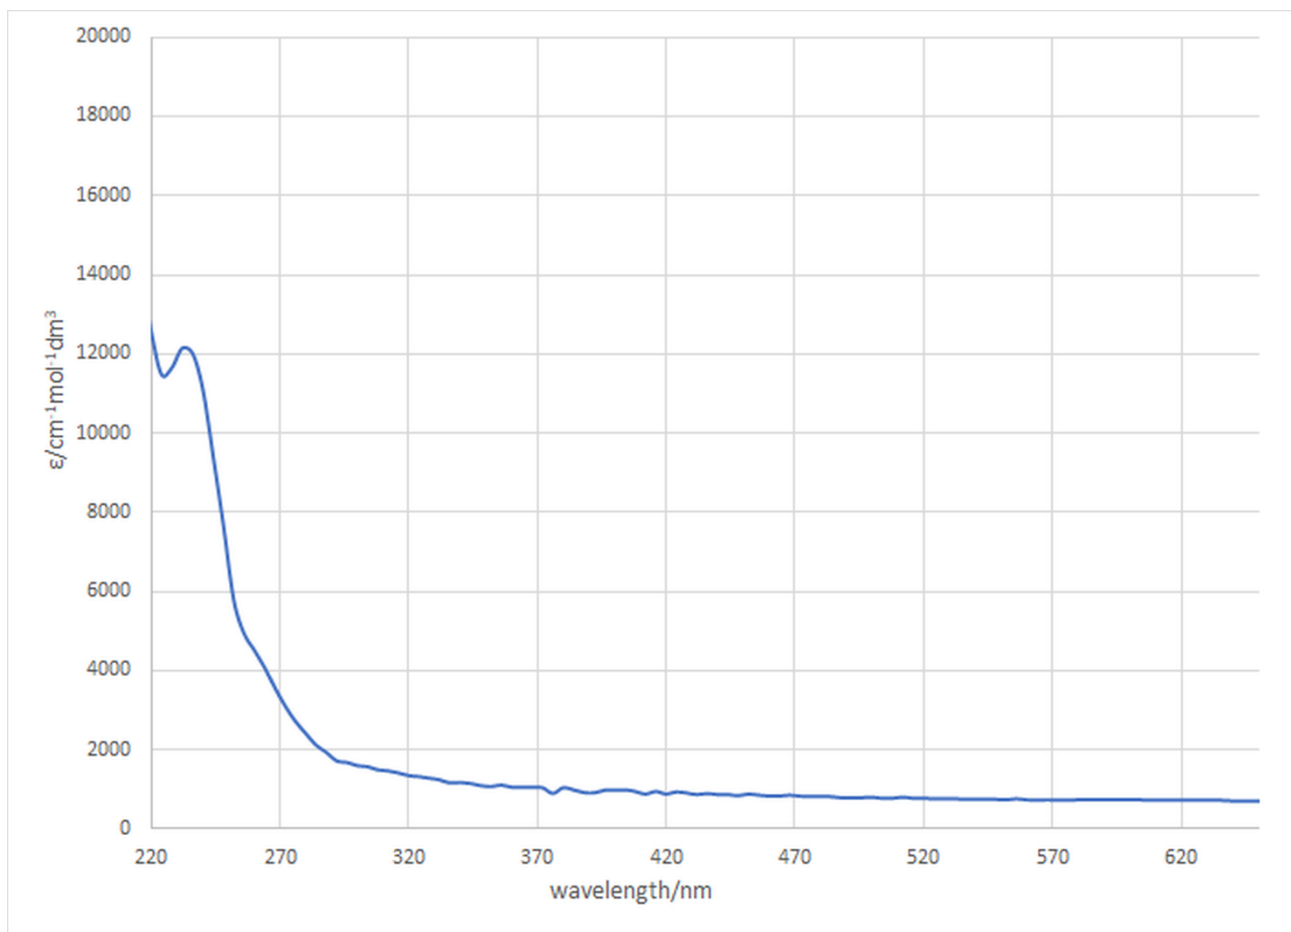

**Figure S244.** UV-VIS spectrum for phosphanylphosphaalkene **3f** in pentane.

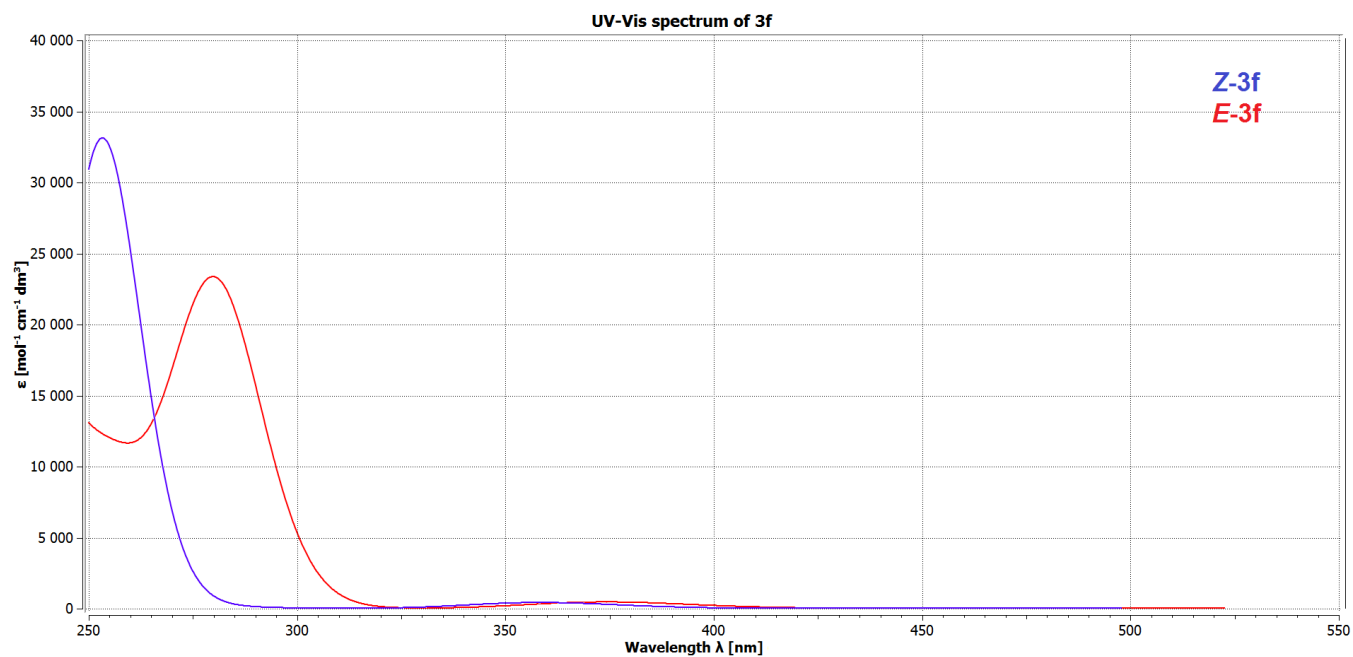

**Figure S245.** Theoretical UV-VIS spectrum for phosphanylphosphaalkene **3f**.



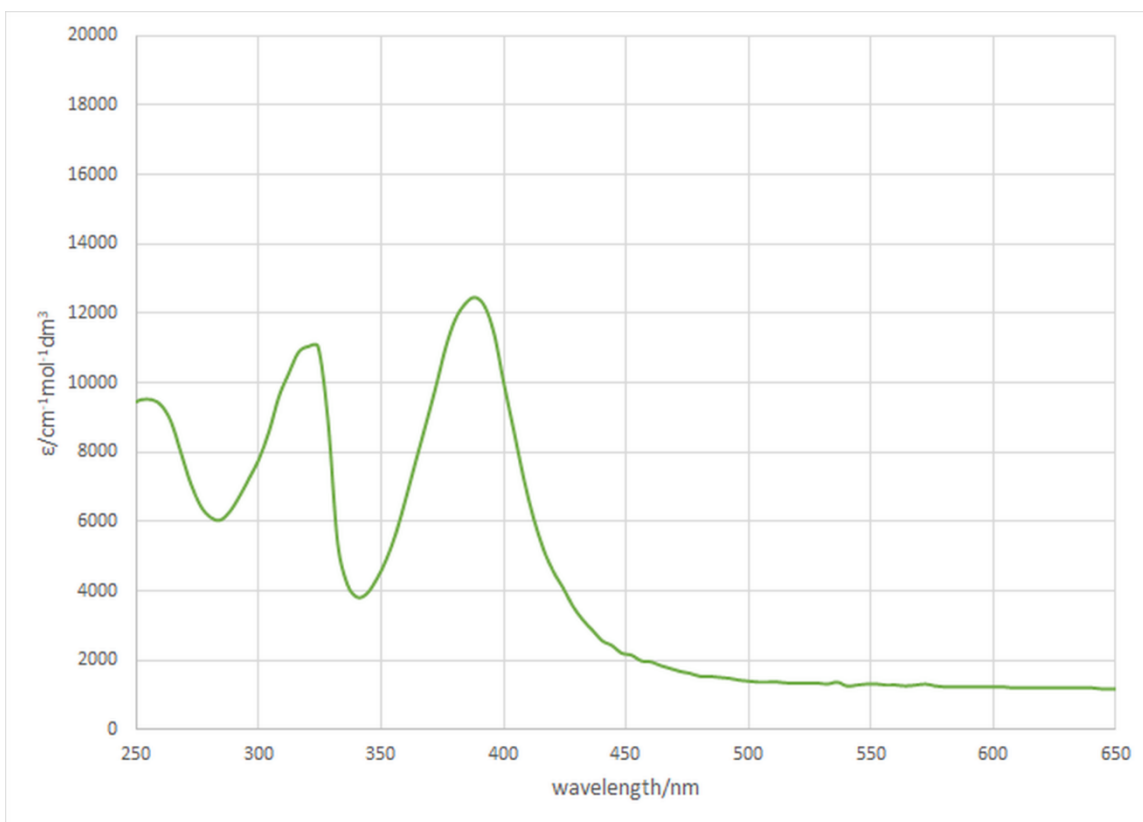

**Figure S246.** UV-VIS spectrum for phosphanylphosphaalkene **4d** in pentane.

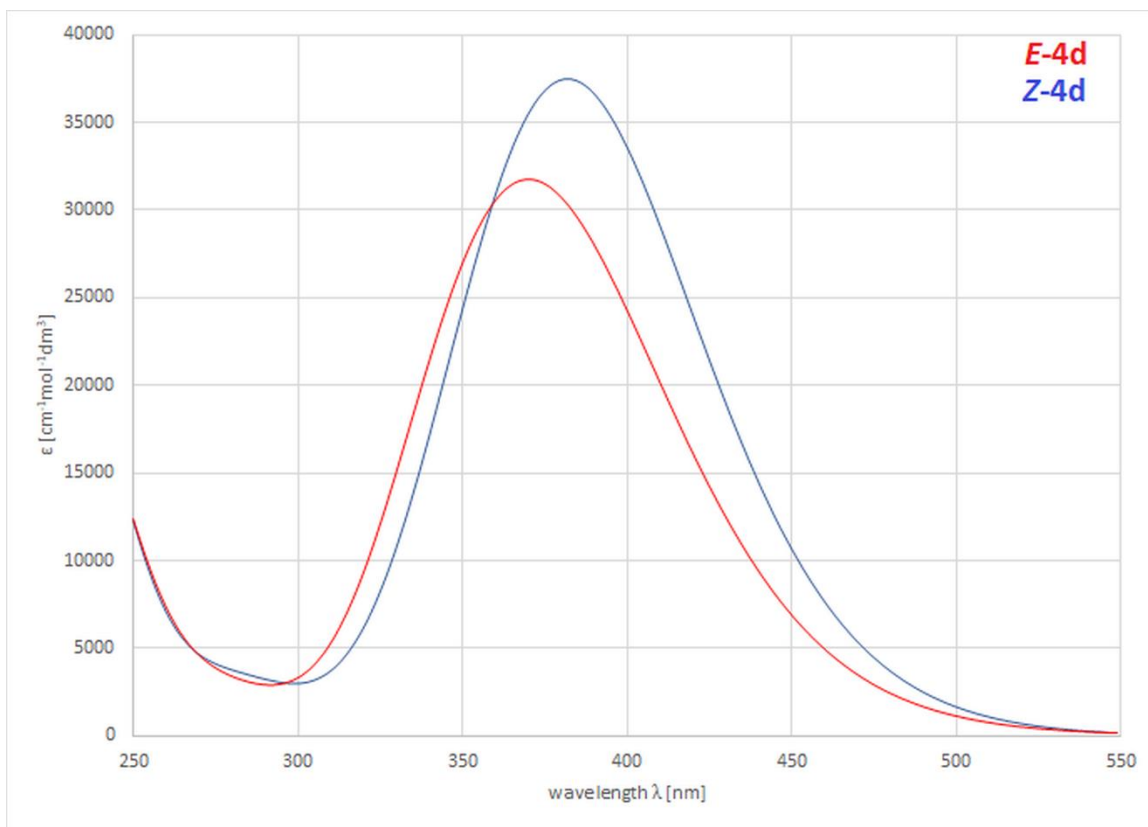

**Figure S247.** Theoretical UV-VIS spectrum for phosphanylphosphaalkene **4d**.

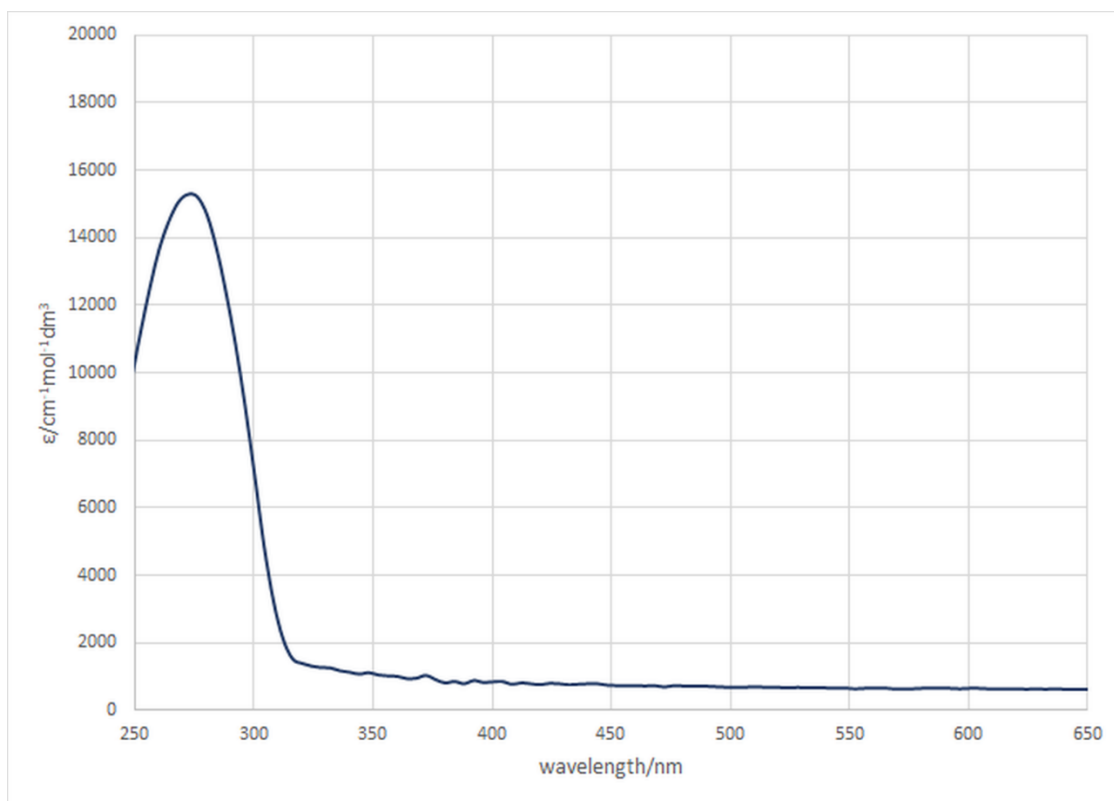

**Figure S248.** UV-VIS spectrum for phosphanylphosphaalkene **4e** in pentane.

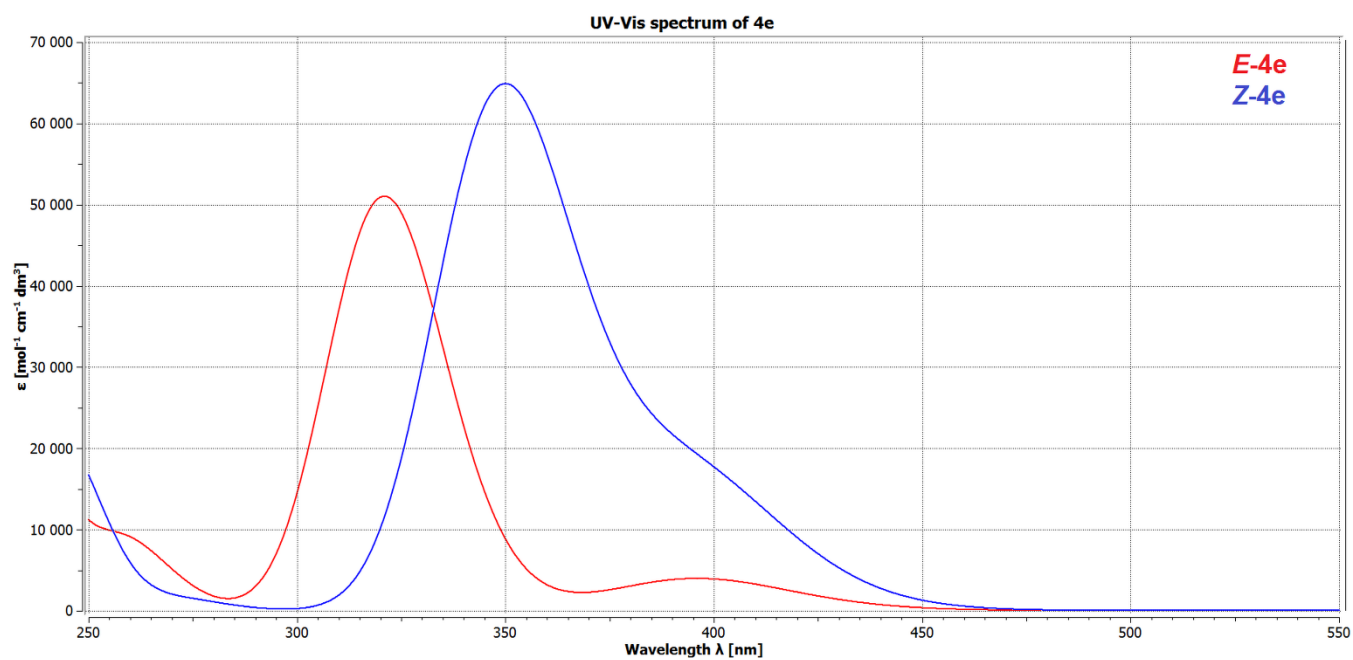

**Figure S249.** Theoretical UV-VIS spectrum for phosphanylphosphaalkene **4e**.

**Table S8.** UV-VIS spectroscopic data of **3a**, **3c**, **3d**, **3e**, **3f**, **4c** and **4d** in pentane at room temperature.

|           | Experimental                                           |                                                       | Theoretical                                            |                                                       |
|-----------|--------------------------------------------------------|-------------------------------------------------------|--------------------------------------------------------|-------------------------------------------------------|
|           | $\pi-\pi^*$ [ $\lambda/\text{nm}$ ( $\log \epsilon$ )] | n- $\pi^*$ [ $\lambda/\text{nm}$ ( $\log \epsilon$ )] | $\pi-\pi^*$ [ $\lambda/\text{nm}$ ( $\log \epsilon$ )] | n- $\pi^*$ [ $\lambda/\text{nm}$ ( $\log \epsilon$ )] |
| <b>3a</b> | 322 (4.09)                                             | 440 (3.28)                                            | 340 (4.45)                                             | 412 (3.49)                                            |
| <b>3c</b> | 320 (3.29)<br>not visible                              | not visible<br>not visible                            | 351 (4.49) <sub>E</sub><br>343 (4.47) <sub>Z</sub>     | 433 (3.56) <sub>E</sub><br>426 (3.42) <sub>Z</sub>    |
| <b>3d</b> | 332 (4.11)                                             | 480 (3.18)                                            | 349 (4.54)                                             | 445 (3.46)                                            |
| <b>3e</b> | 356 (4.27)                                             | 456 (3.69)                                            | 354 (4.46)                                             | 410 (3.87)                                            |
| <b>3f</b> | 264 (3.93)<br>not visible                              | not visible<br>not visible                            | 280 (4.36) <sub>E</sub><br>253 (4.51) <sub>Z</sub>     | 374 (2.65) <sub>E</sub><br>358 (2.61) <sub>Z</sub>    |
| <b>4d</b> | 316 (4.04) <sub>E</sub><br>388 (4.06) <sub>Z</sub>     | not visible<br>not visible                            | 369 (4.51) <sub>E</sub><br>380 (4.64) <sub>Z</sub>     | 391 (4.31) <sub>E</sub><br>359 (4.22) <sub>Z</sub>    |
| <b>4e</b> | 277 (4.18)<br>not visible                              | not visible<br>not visible                            | 320 (4.7) <sub>E</sub><br>349 (4.7) <sub>Z</sub>       | 395 (3.65) <sub>E</sub><br>400 (4.32) <sub>Z</sub>    |

## PART G. References

1. W. Domanska-Babul, J. Chojnacki, E. Matern and J. Pikies, Reactions of  $R_2P-P(SiMe_3)Li$  with  $[(R_3P)_2PtCl_2]$ . A general and efficient entry to phosphanylphosphinidene complexes of platinum. Syntheses and structures of  $[(\eta^2-P=PiPr_2)Pt(p-Tol_3P)_2]$ ,  $[(\eta^2-P=PtBu_2)Pt(p-Tol_3P)_2]$ ,  $[(\eta^2-P=PtBu_2)Pt(p-Tol_3P)_2]$ ,  $[(\eta^2-P=PtBu_2)Pt(p-Tol_3P)_2]$  and  $[(\eta^2-P=PtBu_2)Pt(p-Tol_3P)_2]$ , *Dalton Trans.*, 2009, 146-151.
2. Ł. Ponikiewski, A. Ziólkowska and J. Pikies, Reactions of Lithiated Diphosphanes  $R_2P-P(SiMe_3)Li$  ( $R = tBu$  and  $iPr$ ) with  $[MeNacnacTiCl_2 \cdot THF]$  and  $[MeNacnacTiCl_3]$ . Formation and Structure of TitaniumIII and TitaniumIV  $\beta$ -Diketiminato Complexes Bearing the Side-on Phosphanylphosphido and Phosphanylphosphinidene Functionalities, *Inorg. Chem.*, 2017, **56**, 1094-1103.
3. E. Sattler, E. Matern, A. Rothenberger, A. Okrut, P. Bombicz, I. Fernández and I. Kovács, From Neutral to Ionic Species: Syntheses and X-ray Crystallographic and Multinuclear NMR Spectroscopic Studies of  $Li \cdots P(SiMe_3)-PtBu_2$  and Its Solvent Complexes, *Eur. J. Inorg. Chem.*, 2014, **2014**, 221-232.
4. A. Ziólkowska, N. Szykiewicz and Ł. Ponikiewski, Molecular Structures of the Phospha-Wittig Reaction Intermediate: Initial Step in the Synthesis of Compounds with a  $C=P-P$  Bond as Products in the Phospha-Wittig Reaction, *Organometallics*, 2019, **38**, 2873-2877.
5. A. Ziólkowska, N. Szykiewicz, J. Pikies and Ł. Ponikiewski, Synthesis of compounds with  $C-P-P$  and  $C=P-P$  bond systems based on the phospha-Wittig reaction, *Dalton Transactions*, 2020, **49**, 13635-13646.
6. G. Sheldrick, A short history of SHELX, *Acta Crystallogr. A*, 2008, **64**, 112-122.
7. L. Farrugia, WinGX and ORTEP for Windows: an update, *J. Appl. Cryst.*, 2012, **45**, 849-854.
8. M. J. Frisch, G. W. Trucks, H. B. Schlegel, G. E. Scuseria, M. A. Robb, J. R. Cheeseman, G. Scalmani, V. Barone, G. A. Petersson, H. Nakatsuji, X. Li, M. Caricato, A. V. Marenich, J. Bloino, B. G. Janesko, R. Gomperts, B. Mennucci, H. P. Hratchian, J. V. Ortiz, A. F. Izmaylov, J. L. Sonnenberg, Williams, F. Ding, F. Lipparini, F. Egidi, J. Goings, B. Peng, A. Petrone, T. Henderson, D. Ranasinghe, V. G. Zakrzewski, J. Gao, N. Rega, G. Zheng, W. Liang, M. Hada, M. Ehara, K. Toyota, R. Fukuda, J. Hasegawa, M. Ishida, T. Nakajima, Y. Honda, O. Kitao, H. Nakai, T. Vreven, K. Throssell, J. A. Montgomery Jr., J. E. Peralta, F. Ogliaro, M. J. Bearpark, J. J. Heyd, E. N. Brothers, K. N. Kudin, V. N. Staroverov, T. A. Keith, R. Kobayashi, J. Normand, K. Raghavachari, A. P. Rendell, J. C. Burant, S. S. Iyengar, J. Tomasi, M. Cossi, J. M. Millam, M. Klene, C. Adamo, R. Cammi, J. W. Ochterski, R. L. Martin, K. Morokuma, O. Farkas, J. B. Foresman and D. J. Fox, Gaussian 16 Rev. B.01, *Journal*, 2016.
9. J. Tao, J. P. Perdew, V. N. Staroverov and G. E. Scuseria, Climbing the Density Functional Ladder: Nonempirical Meta-Generalized Gradient Approximation Designed for Molecules and Solids, *Phys. Rev. Lett.*, 2003, **91**, 146401.
10. S. Grimme, S. Ehrlich and L. Goerigk, Effect of the damping function in dispersion corrected density functional theory, *J. Comput. Chem.*, 2011, **32**, 1456-1465.
11. S. Kozuch and S. Shaik, How to Conceptualize Catalytic Cycles? The Energetic Span Model, *Acc. Chem. Res.*, 2011, **44**, 101-110.
12. S. Grimme, Density functional theory with London dispersion corrections, *Wiley Interdiscip. Rev. Comput. Mol. Sci.*, 2011, **1**, 211-228.
13. Y.-S. Lin, G.-D. Li, S.-P. Mao and J.-D. Chai, Long-Range Corrected Hybrid Density Functionals with Improved Dispersion Corrections, *J. Chem. Theory Comput.*, 2013, **9**, 263-272.
14. K. Wolinski, J. F. Hinton and P. Pulay, Efficient implementation of the gauge-independent atomic orbital method for NMR chemical shift calculations, *J. Am. Chem. Soc.*, 1990, **112**, 8251-8260.
15. R. Peverati and D. G. Truhlar, Screened-exchange density functionals with broad accuracy for chemistry and solid-state physics, *Phys. Chem. Chem. Phys.*, 2012, **14**, 16187-16191.
16. V. Barone and M. Cossi, Quantum Calculation of Molecular Energies and Energy Gradients in Solution by a Conductor Solvent Model, *J. Phys. Chem. A.*, 1998, **102**, 1995-2001.
17. R. G. Parr and W. Yang, Density functional approach to the frontier-electron theory of chemical reactivity, *J. Am. Chem. Soc.*, 1984, **106**, 4049-4050.
18. C. Morell, A. Grand and A. Toro-Labbé, New Dual Descriptor for Chemical Reactivity, *J. Phys. Chem. A.*, 2005, **109**, 205-212.
19. F. Weigend, Accurate Coulomb-fitting basis sets for H to Rn, *Phys. Chem. Chem. Phys.*, 2006, **8**, 1057-1065.
20. F. Weigend and R. Ahlrichs, Balanced basis sets of split valence, triple zeta valence and quadruple zeta valence quality for H to Rn: Design and assessment of accuracy, *Phys. Chem. Chem. Phys.*, 2005, **7**, 3297-3305.
